# Supplementary material for: Distinct architectural requirements for the parS centromeric sequence of the pSM19035 plasmid partition machinery
Source: eLife. 2022 Sep 5;11:e79480. doi: 10.7554/eLife.79480 (PMC9499535; doi:10.7554/eLife.79480)
Supplement: Figure 1—figure supplement 1—source data 1. [file elife-79480-fig1-figsupp1-data1.xlsx]

## Sheet: Fig 1-fig supplement 1
Source Data 1: Figure 1-figure supplement 1A (background subtracted data)
		0.25 mM ParA				0.5 mM ParA				1 mM ParA				2 mM ParA
[ParB] (mM)		Mean	SEM	n		Mean	SEM	n		Mean	SEM	n		Mean	SEM	n
0		1.47006	0.569279	3		0.486727	0.118743	4		1.69698	0.552348	4		2.45139	1.82259	3
0.063
0.125
0.25		5.03509	0.653235	3		4.77042	0.949099	3		2.99842	1.46381	3		8.79842	1.62897	3
0.5		5.71345	0.92019	3		8.35487	1.30014	4		13.8261	4.0852	4		17.3891	5.43596	3
1		7.37484	0.716977	3		10.1305	0.454344	4		17.7835	4.35063	4		34.5315	7.06274	3
2		9.28128	1.12742	3		11.007	1.82371	4		22.851	6.26109	4		50.4623	5.02228	3
4		7.37683	1.25243	3		16.5986	2.34173	4		25.8988	7.99366	4		50.0305	11.2051	3
8		9.20227	0.884998	3		13.1719	1.37941	4		25.6534	6.82618	4		58.5609	7.96971	3
Figure 1-figure supplement 1B
		ParBpSM1-27				ParBpSM1-27K10A				ParBpSM1-27-NOpBR322(60uMbp)				ParBP1-30
Peptide(µM)		Mean	SEM	n		Mean	SEM	n		Mean	SEM	n		Mean	SEM	n
0		0.622	0.12038	5		0.783667	0.0360117	6		0.719	0.18438	3		0.751	0.161163	5
0.125		0.903333	0.147779	3		0.795333	0.100335	3		0.815	0.0511175	3		0.9204	0.0199138	5
0.25		1.03133	0.0845406	3		0.797667	0.0578974	3		0.795333	0.002848	3		0.8788	0.048978	5
0.5		1.23467	0.0491031	3		0.779333	0.116247	3		0.717333	0.0217358	3		0.91625	0.0284323	4
1		1.383	0.044238	3		0.797667	0.0396709	3		0.704667	0.0160451	3		0.636333	0.0840364	3
2		1.859	0.15094	3		0.924	0.018735	3		0.886	0.0654548	3		0.6524	0.172628	5
4		1.86633	0.0879703	3		0.957333	0.0625309	3		0.627333	0.00895048	3		0.37	0.133028	3
8		1.8188	0.247719	5		0.9484	0.0522538	5		0.798	0.0419047	3		0.641	0.140287	5
16		1.9246	0.185226	5		0.844333	0.0620568	6		0.667333	0.0225191	3		0.561333	0.057762	3
32		2.0415	0.115054	4		1.27967	0.164825	6		0.736333	0.0349205	3		0.729	0.160274	5
64		2.24575	0.12185	4		1.4015	0.0417969	6		0.691	0.0295014	3		0.525667	0.0826263	3
128		3.097	0.0992195	4		2.039	0.0984811	6		0.718	0.0280416	3		0.6898	0.0776398	5
256		3.2405	0.126487	4		3.169	0.0279678	6		0.659667	0.0307481	3		0.485667	0.186298	3
Figure 1-figure supplement 1C
		no DNA				7R 150 nM				7R 750 nM
		Mean	SEM	n		Mean	SEM	n		Mean	SEM	n
[ParB]
0		0.940333	0.0833753	3		0.816	0.12282	6		1.018	0.399331	3
0.25		0.679	0.263345	3		3.0035	0.267131	6		2.89367	0.6398	3
0.5		0.846333	0.0900765	3		5.83067	0.316871	6		5.49433	1.52444	3
1		0.802667	0.201961	3		10.8398	1.57155	6		11.5917	0.462478	3
2		0.841667	0.308377	3		9.59167	1.23459	6		15.1393	0.97419	3
4		1.29433	0.442689	3		7.81133	0.59084	6		19.2263	1.24792	3
8		0.826	0.161958	3		6.4025	0.349798	6		15.3203	0.641416	3
16		0.366667	0.140789	3		5.35033	0.343135	6		13.2903	1.47363	3
