# Supplementary material for: Distinct architectural requirements for the parS centromeric sequence of the pSM19035 plasmid partition machinery
Source: eLife. 2022 Sep 5;11:e79480. doi: 10.7554/eLife.79480 (PMC9499535; doi:10.7554/eLife.79480)
Supplement: Figure 1—figure supplement 3—source data 1. [file elife-79480-fig1-figsupp3-data1.xlsx]

## Sheet: Fig 1-fig supplement 3
Source Data 1: Figure 1-figur+A1:L73e supplement 3A
	4R parSpSM
	free DNA				specific complex				non-specific complex
[ParBpSM] (nM)
	Mean	SEM	n		Mean	SEM	n		Mean	SEM	n
0	97.6017	1.36503	4		0.213666	0.114175	4		1.16233	0.347132	4
0.24	96.7965	1.8345	3		0.229079	0.0627886	3		3.11487	1.17962	3
0.485	95.931	1.10007	4		0.223443	0.0297323	4		1.99637	0.668065	4
0.975	97.6392	1.5345	4		0.21178	0.0830425	4		2.76197	0.819164	4
1.95	97.5576	1.18858	4		2.09878	1.75698	4		2.44823	0.822868	4
3.905	89.6171	4.14093	4		6.63233	2.13589	4		3.02519	0.872218	4
7.81	83.4658	5.56041	4		20.7258	2.42457	4		2.17372	0.741571	4
15.625	68.3108	7.64203	4		29.0532	4.9519	4		2.21867	0.653742	4
31.25	42.8489	10.8663	4		34.9632	7.63902	4		1.32519	0.458777	4
62.5	29.6528	2.24912	4		50.3971	5.64465	4		0.747732	0.35801	4
125	26.5456	4.35583	4		59.1912	3.40092	4		1.7621	0.697845	4
250	19.5893	2.16751	4		58.4851	2.14854	4		0.874226	0.473257	4
500	15.5457	3.08408	4		62.7563	2.3514	4		1.41574	0.452291	4
1000	12.1299	1.42273	4		61.9236	3.37004	4		1.80964	0.603411	4
2000	10.2109	1.90674	4		67.0176	4.23495	4		2.19115	1.0647	4
4000	9.68948	1.39963	4		59.0169	4.37941	4		1.97138	0.560937	4
Figure 1-figure supplement 3B
	3R parSpSM
	free DNA				specific complex				non-specific complex
[ParBpSM] (nM)
	Mean	SEM	n		Mean	SEM	n		Mean	SEM	n
0	98.237	1.11445	4		0.154248	0.0534342	4		0.934711	0.48817	4
0.24	96.7581	1.15809	3		0.221378	0.0343785	3		1.5242	0.756567	3
0.485	93.8327	1.90906	3		0.181901	0.0240796	3		2.31504	0.268035	3
0.975	97.8937	2.10631	3		0.0670815	0.0234257	3		1.97934	0.783661	3
1.95	94.1678	0.525426	3		0.176702	0.0836502	3		1.82137	1.22015	3
3.905	95.9808	0.492577	3		7.82221	4.09789	3		1.10076	0.872996	3
7.81	81.8709	5.53048	3		23.2939	7.19101	3		1.37193	0.540152	3
15.625	66.3668	7.29018	4		36.3221	5.91491	4		3.3281	1.30685	4
31.25	47.667	6.6437	4		50.068	4.59372	4		3.02428	0.913301	4
62.5	28.4192	4.43447	4		52.569	3.09528	4		2.11773	0.890239	4
125	24.0706	5.49824	4		60.0557	4.60649	4		2.47326	0.876328	4
250	19.428	5.81784	4		55.9822	3.87916	4		1.78238	0.885694	4
500	20.1793	7.14262	4		58.2864	5.80329	4		1.91815	0.587194	4
1000	16.6021	6.05489	4		59.4846	4.2802	4		2.37836	0.837415	4
2000	13.8462	4.02884	4		62.3673	8.47765	4		2.35071	0.263665	4
4000	9.25794	3.5439	4		60.7887	6.65367	4		2.12201	0.727606	4
Figure 1-figure supplement 3C
	nsDNA
	free DNA				specific complex				non-specific complex
[ParBpSM] (nM)
	Mean	SEM	n		Mean	SEM	n		Mean	SEM	n
0	98.5811	0.91689	4						2.00251	1.03987	4
0.24	94.9872	0.37527	2						1.7331	0.381353	2
0.485	97.1635	0.627275	2						5.93768	0.0583303	2
0.975	94.9742	1.28045	2						2.61385	1.21773	2
1.95	93.6554	5.06955	2						1.75171	0.420104	2
3.905	96.3582	0.52377	2						4.75068	1.12667	2
7.81	99.023	0.97699	2						0.497436	0.485436	2
15.625	91.4787	4.09912	4						0.694562	0.308322	4
31.25	92.701	1.89421	4						1.06381	0.429845	4
62.5	90.6299	4.11468	4						1.29599	0.652986	4
125	84.2078	7.97421	4						1.33075	0.50589	4
250	71.2049	10.1992	4						1.81048	1.16791	4
500	52.8072	6.89582	4						7.08038	2.07412	4
1000	34.6067	9.41216	4						11.7398	3.51436	4
2000	16.4543	3.66195	4						20.7329	9.06032	4
4000	15.5543	4.44704	4						21.8979	8.17265	4
8000	11.8448	1.80857	2						9.52817	7.11204	2
