# Supplementary material for: Distinct architectural requirements for the parS centromeric sequence of the pSM19035 plasmid partition machinery
Source: eLife. 2022 Sep 5;11:e79480. doi: 10.7554/eLife.79480 (PMC9499535; doi:10.7554/eLife.79480)
Supplement: Figure 1—source data 1. [file elife-79480-fig1-data1.xlsx]

## Sheet: Fig 1A-D
Figure 1A baseline corrected data
		7R				6R				5R				4R				3R				2R				1R				scram				no DNA
ParBpSM (μM)		Mean	SEM	n		Mean	SEM	n		Mean	SEM	n		Mean	SEM	n		Mean	SEM	n		Mean	SEM	n		Mean	SEM	n		Mean	SEM	n		Mean	SEM	n
0		1.06758	0.177204	7		1.09206	0.207506	6		1.30713	0.459333	5		0.807299	0.198963	7		1.05844	0.292536	7		0.989227	0.610397	4		0.436227	0.187885	4		0.598227	0.196818	6		0.712061	0.0871597	3
0.063		2.50761	0.620579	4		2.53086	0.655859	4		1.78286	0.791758	3		0.906262	0.419591	5		0.889862	0.210652	4		0.305196	0.231107	3		0.420529	0.146129	3		0.696196	0.310388	3
0.125		4.04507	0.799408	4		3.98532	0.959748	4		2.70874	1.09261	3		1.82667	0.7589	5		1.00957	0.17928	4		0.575408	0.16903	3		0.702074	0.433894	3		0.597074	0.166693	3
0.187		5.55029	1.37928	7																										0.861786	0.290805	6
0.25		6.41028	0.588517	7		6.46625	0.475728	6		5.04662	0.482409	5		3.67822	1.18557	5		1.41199	0.452538	7		1.72692	0.791167	4		1.35667	0.80371	4		0.748088	0.231731	3		0.431421	0.264461	3
0.375		7.62444	0.990905	7																										0.944435	0.303187	6
0.5		9.72869	0.285362	7		9.43628	0.821586	6		7.83412	0.686496	5		5.61426	0.919319	7		2.22354	0.3342	7		3.16712	1.32164	4		1.50987	0.642862	4		1.02178	0.385536	3		0.579449	0.0930356	3
0.75		12.5301	1.24824	7																										1.26581	0.0750421	6
1		15.3839	0.892506	7		15.8877	1.19108	6		14.9107	0.888802	5		8.46407	1.27572	7		2.84379	0.299107	7		2.7745	0.749271	4		1.82025	0.663789	4		1.15884	0.596208	3		0.49717	0.203127	3
1.5		17.3752	0.861792	7																										1.47272	0.45617	6
2		20.3889	0.7073	7		19.8876	0.818756	6		19.1231	1.07572	5		14.1629	1.02853	7		3.19528	0.599524	7		3.88653	1.45717	4		2.34253	1.07168	4		1.19895	0.250967	3		0.458946	0.309082	3
3		21.3781	1.40921	7																										1.34022	0.53496	6
4		21.6625	0.891972	7		21.633	1.11859	6		22.5772	0.854173	5		17.015	1.12307	7		3.63283	0.550912	7		3.63983	1.11674	4		3.35758	1.04336	4		1.83716	0.65301	3		0.757165	0.443558	3
6		21.892	1.05245	7																										2.20055	0.466862	6
8		20.3592	1.32601	4		21.5376	0.83894	6		21.0955	0.840591	5		19.9046	1.07828	6		4.07327	0.819751	6		4.09244	1.47881	4		3.25344	1.28969	4		2.3996	1.06644	3		-0.0200647	0.171182	3
Fig 1B baseline corrected data
		4R-parS(→→←←)				4R-parS(→→←→)				4R-parS(→→→→)
ParBpSM (μM)		Mean	SEM	n		Mean	SEM	n		Mean	SEM	n
0		0.817299	0.201274	7		0.793727	0.370133	3		0.835394	0.183468	3
0.063		0.906262	0.419591	5
0.125		1.82667	0.7589	5
0.25		3.67822	1.18557	5		2.23909	0.599937	3		3.15475	0.400906	3
0.5		5.61426	0.919319	7		5.51312	0.661937	3		6.04045	0.814178	3
1		8.46407	1.27572	7		9.38117	0.71623	3		7.86117	1.429	3
2		14.1629	1.02853	7		12.4866	1.40321	3		10.5386	0.965177	3
4		17.015	1.12307	7		16.2962	0.775321	3		14.0778	0.599388	3
8		19.9213	1.0811	6		18.8979	1.08197	3		14.0169	2.47524	3
Fig 1C baseline corrected data
		3R-parS(→→←)				3R-parS(→→→)				3R-1ncparS(→→←-)				3R-1nc-3RparS(→→→-←←←)				3R-2nc-3RparS(→→→--←←←)
ParBpSM (μM)		Mean	SEM	n		Mean	SEM	n		Mean	SEM	n		Mean	SEM	n		Mean	SEM	n
0		1.0483	0.292145	7		0.486727	0.130287	3		1.09458	0.24218	7		0.682852	0.122776	8		1.62339	0.265766	6
0.063		0.817862	0.142512	4
0.125		1.00957	0.17928	4						2.03632	0.140966	4		1.69274	0.16265	3		1.54187	0.309312	5
0.25		1.46828	0.472431	7		1.20875	0.316548	3		1.85592	0.30284	4		1.72799	0.248635	7		2.31982	0.471443	5
0.5		2.22369	0.334277	7		1.83478	0.509026	3		2.74983	0.261738	7		2.24962	0.305512	8		3.05645	0.508185	6
1		2.84693	0.300615	7		1.88817	0.271835	3		3.01936	0.235246	7		2.76925	0.299912	8		3.0435	0.345212	6
2		3.18614	0.59514	7		2.57728	0.307161	3		3.84228	0.434918	7		4.6859	0.382669	8		3.80478	0.464755	6
4		3.63283	0.550912	7		3.92716	0.684209	3		4.55733	0.550334	6		5.85083	0.409521	8		4.44516	0.527783	6
8		4.0816	0.828842	6		2.9576	0.290014	3		4.27665	0.487761	7		6.88731	0.857307	8		4.88444	0.634322	6
	Figure 1D data
	7R-parS (nM)		Mean	SEM	n
	0		3.309	0.480359	7
	1.2		4.415	0.454889	4
	2.3		5.74733	0.388893	6
	4.7		6.90943	0.535641	7
	9.4		8.59714	0.57912	7
	18.8		12.8279	1.32733	7
	37.5		20.6173	1.44246	7
	75		22.1194	0.778866	7
	150		22.7937	0.801604	3
