# Supplementary material for: Distinct architectural requirements for the parS centromeric sequence of the pSM19035 plasmid partition machinery
Source: eLife. 2022 Sep 5;11:e79480. doi: 10.7554/eLife.79480 (PMC9499535; doi:10.7554/eLife.79480)
Supplement: Figure 2—figure supplement 1—source data 1. [file elife-79480-fig2-figsupp1-data1.xlsx]

## Sheet: Fig 2-fig supplement 1
Figure 2-figure supplement 1
		ParA-GFP				ParA D60A-GFP
[ParB] (mM)		Mean	SEM	n		Mean	SEM	n
0		1.29173	0.507765	5		1.98933	0.559498	5
0.031		0.611	0.290496	3		2.672	0.0482709	3
0.063		1.07053	0.291519	3		2.50853	0.332283	3
0.125		1.72441	0.355737	3		3.58174	0.385004	3
0.25		2.85609	0.426424	3		2.67142	0.187186	3
0.5		5.26845	0.481453	3		2.17372	0.501155	5
1		13.4673	0.744409	5		1.8813	0.587486	5
2		17.5683	1.01917	5		1.83728	0.615756	5
4		24.5516	2.12904	5		1.79763	0.495584	5
