# Supplementary material for: Distinct architectural requirements for the parS centromeric sequence of the pSM19035 plasmid partition machinery
Source: eLife. 2022 Sep 5;11:e79480. doi: 10.7554/eLife.79480 (PMC9499535; doi:10.7554/eLife.79480)
Supplement: Figure 2—figure supplement 3—source data 1. [file elife-79480-fig2-figsupp3-data1.xlsx]

## Sheet: Fig 2-fig supplement 3
Figure 2-figure supplement 3 (A)																															Figure 2-figure supplement 3 (B)
		Buffer				nsDNA				ParB				ParB-3R				ParB-4R				ParB-7R				ParB-nsDNA							Buffer				nsDNA				ParB				ParB-7R				ParB-nsDNA
Time(min)		Mean	SEM	n		Mean	SEM	n		Mean	SEM	n		Mean	SEM	n		Mean	SEM	n		Mean	SEM	n		Mean	SEM	n			Time(min)		Mean	SEM	n		Mean	SEM	n		Mean	SEM	n		Mean	SEM	n		Mean
0		1	0	2		1	0	2		1	0	2		1	0	2		1	0	2		1	0	2		1	0	2			0		1	0	2		1	0	2		1	0	2		1	0	2		1
0.017		0.9975	0.0015	2		0.9925	0.0015	2		0.9945	0.0005	2		0.991	0	2		0.9935	0.0035	2		0.9965	0.0015	2		0.983	0.012	2			0.017		0.9885	0.0005	2		0.99	0.005	2		0.996	0	2		0.989	0.005	2		0.991
0.033		0.992	0.004	2		0.995	0.001	2		0.99	0.009	2		0.981	0.002	2		0.9945	0.0005	2		0.9935	0.0005	2		0.9795	0.0155	2			0.033		0.949	0.039	2		0.988	0.009	2		0.9875	0.0015	2		0.9925	0.0145	2		0.991
0.05		0.9905	0.0065	2		0.993	0	2		0.9795	0.0135	2		0.9785	0.0035	2		0.9915	0.0005	2		0.9915	0.0005	2		0.9775	0.0185	2			0.05		0.943	0.042	2		0.9795	0.0185	2		0.992	0	2		0.968	0.018	2		0.995
0.067		0.98	0.001	2		0.9885	0.0035	2		0.9715	0.0095	2		0.9715	0.0025	2		0.9875	0.0045	2		0.99	0.001	2		0.975	0.021	2			0.067		0.9425	0.0415	2		0.9535	0.0415	2		0.98	0.001	2		0.96	0.023	2		0.97
0.083		0.9765	0.0015	2		0.9945	0.0015	2		0.9655	0.0085	2		0.971	0.003	2		0.9905	0.0015	2		0.9885	0.0025	2		0.975	0.02	2			0.083		0.937	0.042	2		0.9345	0.0615	2		0.9735	0.0015	2		0.956	0.031	2		0.957
0.1		0.974	0.003	2		0.9895	0.0045	2		0.9625	0.0125	2		0.9695	0.0025	2		0.985	0.001	2		0.9845	0.0015	2		0.972	0.025	2			0.1		0.933	0.04	2		0.928	0.068	2		0.9675	0.0015	2		0.95	0.035	2		0.9475
0.117		0.97	0.004	2		0.982	0.001	2		0.958	0.013	2		0.9685	0.0015	2		0.9825	0.0035	2		0.9825	0.0005	2		0.972	0.026	2			0.117		0.93	0.043	2		0.921	0.074	2		0.959	0.002	2		0.9475	0.0405	2		0.9445
0.133		0.9675	0.0045	2		0.98	0.001	2		0.951	0.014	2		0.9645	0.0005	2		0.98	0.003	2		0.981	0	2		0.968	0.026	2			0.133		0.9235	0.0445	2		0.9155	0.0795	2		0.9505	0.0025	2		0.943	0.043	2		0.9365
0.15		0.9645	0.0065	2		0.982	0.003	2		0.9505	0.0145	2		0.9625	0.0005	2		0.982	0.001	2		0.9805	0.0015	2		0.967	0.031	2			0.15		0.9175	0.0425	2		0.9135	0.0865	2		0.936	0.003	2		0.944	0.054	2		0.9315
0.167		0.965	0.003	2		0.9775	0.0005	2		0.9465	0.0145	2		0.9595	0.0015	2		0.978	0.002	2		0.98	0.002	2		0.966	0.029	2			0.167		0.912	0.039	2		0.911	0.085	2		0.9285	0.0035	2		0.936	0.051	2		0.926
0.183		0.963	0.003	2		0.976	0.001	2		0.9455	0.0165	2		0.959	0.001	2		0.975	0.001	2		0.976	0.001	2		0.9635	0.0305	2			0.183		0.911	0.038	2		0.9065	0.0895	2		0.914	0.004	2		0.931	0.052	2		0.924
0.2		0.961	0.004	2		0.9735	0.0005	2		0.9405	0.0195	2		0.9545	0.0015	2		0.973	0.002	2		0.9745	0.0015	2		0.9645	0.0315	2			0.2		0.9045	0.0395	2		0.9075	0.0915	2		0.908	0.004	2		0.93	0.054	2		0.9245
0.217		0.96	0.005	2		0.972	0.004	2		0.9385	0.0205	2		0.9565	0.0015	2		0.972	0.001	2		0.972	0.002	2		0.961	0.031	2			0.217		0.906	0.036	2		0.908	0.091	2		0.8985	0.0045	2		0.9305	0.0605	2		0.921
0.233		0.959	0.006	2		0.973	0.005	2		0.936	0.021	2		0.954	0.002	2		0.9735	0.0025	2		0.971	0.002	2		0.9605	0.0335	2			0.233		0.901	0.036	2		0.8535	0.0455	2		0.897	0.005	2		0.9395	0.0605	2		0.921
0.25		0.958	0.004	2		0.971	0.004	2		0.934	0.023	2		0.952	0.003	2		0.9695	0.0025	2		0.968	0.001	2		0.9615	0.0335	2			0.25		0.896	0.034	2		0.8345	0.0325	2		0.8835	0.0055	2		0.921	0.063	2		0.924
0.267		0.957	0.004	2		0.969	0.008	2		0.9345	0.0255	2		0.953	0.002	2		0.9705	0.0035	2		0.966	0.002	2		0.961	0.036	2			0.267		0.8915	0.0325	2		0.821	0.019	2		0.8745	0.0055	2		0.9185	0.0595	2		0.909
0.283		0.9535	0.0055	2		0.9665	0.0025	2		0.931	0.027	2		0.953	0.002	2		0.9645	0.0005	2		0.9645	0.0015	2		0.9585	0.0325	2			0.283		0.891	0.032	2		0.813	0.011	2		0.8705	0.0055	2		0.92	0.066	2		0.899
0.3		0.955	0.005	2		0.9685	0.0045	2		0.929	0.028	2		0.945	0.004	2		0.966	0.004	2		0.962	0.002	2		0.94	0.017	2			0.3		0.8885	0.0325	2		0.809	0.008	2		0.8675	0.0065	2		0.9185	0.0695	2		0.882
0.317		0.9535	0.0045	2		0.968	0.005	2		0.924	0.028	2		0.9475	0.0035	2		0.966	0.004	2		0.9615	0.0005	2		0.938	0.015	2			0.317		0.8865	0.0325	2		0.802	0.006	2		0.8605	0.0065	2		0.9105	0.0615	2		0.867
0.333		0.9525	0.0035	2		0.9675	0.0065	2		0.925	0.03	2		0.9455	0.0045	2		0.9645	0.0065	2		0.9615	0.0005	2		0.9355	0.0135	2			0.333		0.887	0.033	2		0.798	0.006	2		0.854	0.007	2		0.9115	0.0675	2		0.8595
0.35		0.949	0.003	2		0.962	0.003	2		0.9215	0.0295	2		0.9455	0.0035	2		0.9585	0.0035	2		0.9585	0.0015	2		0.9345	0.0145	2			0.35		0.877	0.033	2		0.797	0.004	2		0.855	0.007	2		0.913	0.074	2		0.854
0.367		0.951	0.007	2		0.9585	0.0045	2		0.92	0.031	2		0.9445	0.0055	2		0.9585	0.0005	2		0.9565	0.0015	2		0.933	0.012	2			0.367		0.877	0.034	2		0.79	0.002	2		0.846	0.007	2		0.913	0.077	2		0.843
0.383		0.9495	0.0045	2		0.9575	0.0025	2		0.919	0.033	2		0.94	0.006	2		0.955	0	2		0.9575	0.0025	2		0.9305	0.0145	2			0.383		0.8755	0.0345	2		0.789	0.002	2		0.8435	0.0075	2		0.9085	0.0745	2		0.838
0.4		0.9495	0.0045	2		0.9575	0.0065	2		0.9155	0.0335	2		0.9385	0.0065	2		0.956	0.004	2		0.9545	0.0005	2		0.9255	0.0105	2			0.4		0.872	0.031	2		0.782	0.003	2		0.846	0.007	2		0.907	0.077	2		0.8305
0.417		0.946	0.006	2		0.9555	0.0045	2		0.9155	0.0345	2		0.9395	0.0075	2		0.9525	0.0025	2		0.953	0	2		0.9245	0.0115	2			0.417		0.873	0.035	2		0.78	0.004	2		0.8365	0.0075	2		0.9005	0.0705	2		0.8285
0.433		0.9465	0.0045	2		0.952	0.004	2		0.9135	0.0335	2		0.939	0.007	2		0.9495	0.0015	2		0.952	0.001	2		0.9255	0.0115	2			0.433		0.865	0.034	2		0.7755	0.0015	2		0.8495	0.0075	2		0.9215	0.0795	2		0.826
0.45		0.9455	0.0055	2		0.953	0.004	2		0.912	0.035	2		0.938	0.007	2		0.9485	0.0045	2		0.952	0.001	2		0.9205	0.0105	2			0.45		0.867	0.03	2		0.775	0.002	2		0.8385	0.0075	2		0.905	0.083	2		0.8335
0.467		0.945	0.004	2		0.946	0.004	2		0.91	0.036	2		0.936	0.008	2		0.9455	0.0005	2		0.948	0.001	2		0.9185	0.0095	2			0.467		0.866	0.031	2		0.771	0.004	2		0.8325	0.0075	2		0.8945	0.0745	2		0.8195
0.483		0.9415	0.0035	2		0.945	0.005	2		0.907	0.038	2		0.9345	0.0085	2		0.943	0.001	2		0.944	0.001	2		0.918	0.009	2			0.483		0.8645	0.0295	2		0.774	0.003	2		0.8315	0.0075	2		0.8655	0.0485	2		0.814
0.5		0.9425	0.0035	2		0.9405	0.0025	2		0.909	0.04	2		0.936	0.008	2		0.9405	0.0035	2		0.9425	0.0025	2		0.919	0.01	2			0.5		0.864	0.029	2		0.772	0.002	2		0.8325	0.0075	2		0.848	0.033	2		0.818
0.517		0.9425	0.0045	2		0.943	0.006	2		0.9075	0.0385	2		0.935	0.009	2		0.9425	0.0005	2		0.9425	0.0005	2		0.9125	0.0075	2			0.517		0.8605	0.0265	2		0.7705	0.0025	2		0.825	0.008	2		0.836	0.021	2		0.8095
0.533		0.9415	0.0045	2		0.9355	0.0025	2		0.906	0.039	2		0.9315	0.0095	2		0.9365	0.0055	2		0.942	0.001	2		0.9115	0.0075	2			0.533		0.8605	0.0285	2		0.771	0.002	2		0.83	0.008	2		0.835	0.019	2		0.807
0.55		0.941	0.006	2		0.9355	0.0045	2		0.903	0.041	2		0.931	0.009	2		0.9375	0.0045	2		0.9405	0.0025	2		0.9135	0.0085	2			0.55		0.8575	0.0265	2		0.7655	0.0035	2		0.826	0.008	2		0.825	0.014	2		0.8035
0.567		0.9395	0.0045	2		0.937	0.005	2		0.9035	0.0405	2		0.9305	0.0085	2		0.9365	0.0015	2		0.9375	0.0015	2		0.91	0.009	2			0.567		0.8585	0.0265	2		0.7635	0.0025	2		0.826	0.008	2		0.822	0.014	2		0.8005
0.583		0.9415	0.0045	2		0.934	0.004	2		0.9025	0.0415	2		0.931	0.01	2		0.933	0.002	2		0.9385	0.0005	2		0.91	0.008	2			0.583		0.8575	0.0265	2		0.7645	0.0025	2		0.825	0.01	2		0.8145	0.0065	2		0.8005
0.6		0.939	0.003	2		0.9335	0.0055	2		0.8975	0.0435	2		0.929	0.01	2		0.933	0.001	2		0.9375	0.0005	2		0.908	0.009	2			0.6		0.858	0.026	2		0.764	0.004	2		0.824	0.008	2		0.8125	0.0075	2		0.8
0.617		0.9385	0.0045	2		0.928	0.003	2		0.8985	0.0425	2		0.928	0.011	2		0.9285	0.0045	2		0.936	0.001	2		0.9065	0.0075	2			0.617		0.856	0.024	2		0.762	0.004	2		0.822	0.008	2		0.81	0.003	2		0.7945
0.633		0.937	0.005	2		0.9275	0.0035	2		0.898	0.045	2		0.9235	0.0115	2		0.9275	0.0035	2		0.933	0.001	2		0.904	0.007	2			0.633		0.8535	0.0255	2		0.7625	0.0025	2		0.831	0.008	2		0.8165	0.0035	2		0.7935
0.65		0.9375	0.0025	2		0.925	0.002	2		0.8945	0.0465	2		0.927	0.012	2		0.9245	0.0055	2		0.933	0.003	2		0.9035	0.0065	2			0.65		0.8495	0.0265	2		0.7575	0.0015	2		0.8225	0.0085	2		0.796	0.007	2		0.8025
0.667		0.9365	0.0035	2		0.9255	0.0025	2		0.895	0.046	2		0.9265	0.0115	2		0.923	0.003	2		0.928	0.003	2		0.9045	0.0065	2			0.667		0.853	0.025	2		0.757	0.006	2		0.8205	0.0085	2		0.8	0.002	2		0.791
0.683		0.9375	0.0025	2		0.922	0.001	2		0.8955	0.0475	2		0.9255	0.0115	2		0.9195	0.0045	2		0.9265	0.0025	2		0.9035	0.0075	2			0.683		0.853	0.026	2		0.7555	0.0045	2		0.8185	0.0085	2		0.7985	0.0045	2		0.788
0.7		0.9325	0.0015	2		0.923	0.003	2		0.893	0.048	2		0.924	0.012	2		0.922	0.004	2		0.929	0.002	2		0.902	0.007	2			0.7		0.8475	0.0225	2		0.7535	0.0045	2		0.8195	0.0085	2		0.792	0.008	2		0.7875
0.717		0.9345	0.0025	2		0.9165	0.0005	2		0.894	0.047	2		0.9215	0.0125	2		0.9145	0.0075	2		0.9285	0.0005	2		0.904	0.007	2			0.717		0.8455	0.0275	2		0.753	0.003	2		0.8175	0.0085	2		0.792	0.008	2		0.785
0.733		0.9335	0.0045	2		0.916	0	2		0.8945	0.0475	2		0.9225	0.0125	2		0.9155	0.0085	2		0.927	0.002	2		0.901	0.006	2			0.733		0.848	0.026	2		0.753	0.006	2		0.8225	0.0085	2		0.797	0.001	2		0.785
0.75		0.934	0.004	2		0.9145	0.0015	2		0.8915	0.0475	2		0.9225	0.0125	2		0.913	0.009	2		0.924	0.004	2		0.9005	0.0065	2			0.75		0.8465	0.0285	2		0.753	0.003	2		0.8185	0.0085	2		0.788	0.01	2		0.786
0.767		0.9325	0.0015	2		0.914	0	2		0.89	0.049	2		0.922	0.013	2		0.9125	0.0085	2		0.9225	0.0025	2		0.8985	0.0065	2			0.767		0.847	0.026	2		0.754	0.001	2		0.8165	0.0085	2		0.787	0.007	2		0.7815
0.783		0.933	0	2		0.912	0	2		0.8875	0.0485	2		0.9225	0.0125	2		0.9115	0.0095	2		0.9215	0.0045	2		0.9	0.008	2			0.783		0.8435	0.0255	2		0.754	0.006	2		0.8135	0.0085	2		0.786	0.009	2		0.783
0.8		0.932	0.002	2		0.9095	0.0005	2		0.887	0.05	2		0.918	0.014	2		0.9075	0.0085	2		0.9215	0.0045	2		0.899	0.01	2			0.8		0.8425	0.0275	2		0.7515	0.0015	2		0.8155	0.0085	2		0.7825	0.0085	2		0.78
0.817		0.932	0.003	2		0.9095	0.0015	2		0.886	0.052	2		0.9185	0.0145	2		0.9085	0.0075	2		0.9185	0.0025	2		0.8965	0.0055	2			0.817		0.842	0.027	2		0.7505	0.0035	2		0.812	0.009	2		0.785	0.007	2		0.7815
0.833		0.9295	0.0035	2		0.912	0.004	2		0.885	0.052	2		0.9175	0.0145	2		0.912	0.005	2		0.916	0.003	2		0.895	0.009	2			0.833		0.8425	0.0245	2		0.749	0.004	2		0.819	0.009	2		0.796	0.009	2		0.784
0.85		0.929	0.004	2		0.911	0.004	2		0.884	0.053	2		0.917	0.014	2		0.911	0.005	2		0.915	0.005	2		0.8945	0.0075	2			0.85		0.8405	0.0245	2		0.7475	0.0065	2		0.81	0.009	2		0.782	0.006	2		0.793
0.867		0.93	0.003	2		0.9055	0.0005	2		0.883	0.053	2		0.916	0.015	2		0.9035	0.0095	2		0.9165	0.0015	2		0.8935	0.0075	2			0.867		0.8395	0.0255	2		0.7475	0.0055	2		0.8125	0.0085	2		0.781	0.007	2		0.783
0.883		0.927	0.002	2		0.906	0.001	2		0.882	0.054	2		0.915	0.014	2		0.905	0.008	2		0.914	0.002	2		0.891	0.006	2			0.883		0.8375	0.0265	2		0.7465	0.0055	2		0.8125	0.0085	2		0.776	0.01	2		0.777
0.9		0.9275	0.0035	2		0.9045	0.0015	2		0.882	0.054	2		0.914	0.015	2		0.9005	0.0085	2		0.9155	0.0035	2		0.891	0.007	2			0.9		0.84	0.024	2		0.741	0.007	2		0.8125	0.0085	2		0.7725	0.0115	2		0.776
0.917		0.928	0.004	2		0.9025	0.0025	2		0.881	0.054	2		0.916	0.016	2		0.9005	0.0115	2		0.912	0.002	2		0.888	0.007	2			0.917		0.837	0.024	2		0.7445	0.0045	2		0.8075	0.0085	2		0.767	0.017	2		0.7735
0.933		0.9265	0.0025	2		0.9035	0.0025	2		0.8815	0.0565	2		0.914	0.016	2		0.902	0.007	2		0.912	0.003	2		0.8885	0.0065	2			0.933		0.8385	0.0265	2		0.7435	0.0055	2		0.8105	0.0085	2		0.768	0.014	2		0.774
0.95		0.926	0.004	2		0.899	0.004	2		0.882	0.056	2		0.9135	0.0155	2		0.894	0.01	2		0.911	0.005	2		0.889	0.008	2			0.95		0.8365	0.0225	2		0.74	0.007	2		0.809	0.009	2		0.772	0.009	2		0.773
0.967		0.9255	0.0045	2		0.901	0.003	2		0.88	0.058	2		0.9125	0.0165	2		0.896	0.01	2		0.9085	0.0025	2		0.8885	0.0065	2			0.967		0.8345	0.0215	2		0.7425	0.0055	2		0.8105	0.0085	2		0.7645	0.0145	2		0.773
0.983		0.9245	0.0045	2		0.8985	0.0035	2		0.876	0.058	2		0.9105	0.0165	2		0.894	0.011	2		0.908	0.003	2		0.8875	0.0075	2			0.983		0.8345	0.0245	2		0.7425	0.0035	2		0.8105	0.0085	2		0.7685	0.0115	2		0.773
1		0.923	0.004	2		0.8945	0.0045	2		0.875	0.059	2		0.9085	0.0165	2		0.89	0.012	2		0.9065	0.0045	2		0.888	0.006	2			1		0.8355	0.0255	2		0.74	0.003	2		0.807	0.009	2		0.7605	0.0185	2		0.771
1.017		0.9225	0.0025	2		0.895	0.005	2		0.876	0.059	2		0.9095	0.0165	2		0.888	0.011	2		0.9055	0.0035	2		0.8865	0.0065	2			1.017		0.835	0.024	2		0.7425	0.0015	2		0.804	0.009	2		0.7595	0.0185	2		0.772
1.033		0.9245	0.0035	2		0.895	0.004	2		0.8755	0.0595	2		0.9095	0.0165	2		0.8905	0.0115	2		0.9045	0.0035	2		0.886	0.007	2			1.033		0.8355	0.0235	2		0.7365	0.0045	2		0.807	0.009	2		0.7745	0.0195	2		0.7725
1.05		0.9225	0.0045	2		0.894	0.002	2		0.8735	0.0615	2		0.9085	0.0175	2		0.89	0.01	2		0.9035	0.0015	2		0.8855	0.0095	2			1.05		0.8325	0.0275	2		0.7395	0.0035	2		0.808	0.009	2		0.757	0.017	2		0.786
1.067		0.9225	0.0035	2		0.892	0.006	2		0.874	0.062	2		0.9095	0.0175	2		0.885	0.012	2		0.9005	0.0025	2		0.8845	0.0055	2			1.067		0.8295	0.0245	2		0.738	0.006	2		0.809	0.009	2		0.7545	0.0195	2		0.774
1.083		0.923	0.004	2		0.8895	0.0055	2		0.8715	0.0575	2		0.9075	0.0175	2		0.8845	0.0135	2		0.9005	0.0065	2		0.884	0.008	2			1.083		0.8305	0.0225	2		0.7375	0.0045	2		0.805	0.009	2		0.759	0.012	2		0.775
1.1		0.921	0.004	2		0.888	0.006	2		0.872	0.063	2		0.909	0.016	2		0.884	0.015	2		0.9015	0.0075	2		0.8815	0.0085	2			1.1		0.83	0.025	2		0.7385	0.0025	2		0.805	0.009	2		0.7555	0.0165	2		0.7725
1.117		0.9215	0.0045	2		0.887	0.007	2		0.871	0.061	2		0.91	0.017	2		0.8805	0.0135	2		0.8985	0.0035	2		0.881	0.007	2			1.117		0.829	0.027	2		0.7335	0.0015	2		0.806	0.009	2		0.758	0.013	2		0.768
1.133		0.92	0.007	2		0.8845	0.0075	2		0.8705	0.0595	2		0.908	0.017	2		0.878	0.015	2		0.8995	0.0045	2		0.8775	0.0055	2			1.133		0.8285	0.0275	2		0.734	0	2		0.807	0.009	2		0.756	0.014	2		0.767
1.15		0.918	0.002	2		0.884	0.009	2		0.8725	0.0625	2		0.9075	0.0175	2		0.8775	0.0165	2		0.896	0.004	2		0.878	0.006	2			1.15		0.827	0.025	2		0.7355	0.0035	2		0.8015	0.0095	2		0.7505	0.0145	2		0.769
1.167		0.919	0.005	2		0.8825	0.0085	2		0.87	0.06	2		0.904	0.017	2		0.8765	0.0165	2		0.8945	0.0035	2		0.8755	0.0065	2			1.167		0.8285	0.0235	2		0.7325	0.0015	2		0.804	0.009	2		0.755	0.012	2		0.7645
1.183		0.9195	0.0035	2		0.8775	0.0115	2		0.8705	0.0625	2		0.906	0.017	2		0.871	0.02	2		0.8945	0.0035	2		0.8725	0.0035	2			1.183		0.833	0.02	2		0.7355	0.0005	2		0.804	0.009	2		0.7525	0.0155	2		0.7635
1.2		0.919	0.005	2		0.876	0.012	2		0.87	0.061	2		0.9055	0.0175	2		0.8695	0.0205	2		0.8935	0.0055	2		0.8725	0.0055	2			1.2		0.8285	0.0215	2		0.7375	0.0005	2		0.806	0.009	2		0.752	0.012	2		0.7645
1.217		0.9165	0.0015	2		0.8795	0.0105	2		0.8715	0.0615	2		0.9025	0.0175	2		0.871	0.016	2		0.892	0.005	2		0.8735	0.0055	2			1.217		0.827	0.022	2		0.7325	0.0005	2		0.804	0.009	2		0.7565	0.0095	2		0.7635
1.233		0.918	0.004	2		0.8755	0.0115	2		0.871	0.063	2		0.904	0.019	2		0.867	0.018	2		0.8905	0.0045	2		0.872	0.005	2			1.233		0.825	0.025	2		0.733	0.001	2		0.807	0.009	2		0.765	0.013	2		0.7625
1.25		0.918	0.003	2		0.881	0.009	2		0.8705	0.0595	2		0.9045	0.0175	2		0.8715	0.0135	2		0.8915	0.0065	2		0.875	0.009	2			1.25		0.827	0.022	2		0.732	0.001	2		0.801	0.009	2		0.7455	0.0135	2		0.775
1.267		0.915	0.004	2		0.873	0.014	2		0.867	0.06	2		0.9035	0.0175	2		0.862	0.018	2		0.889	0.006	2		0.8735	0.0055	2			1.267		0.8225	0.0205	2		0.731	0.001	2		0.805	0.009	2		0.747	0.013	2		0.764
1.283		0.9155	0.0065	2		0.876	0.012	2		0.8695	0.0615	2		0.8995	0.0185	2		0.865	0.016	2		0.8885	0.0075	2		0.872	0.004	2			1.283		0.826	0.024	2		0.733	0.006	2		0.804	0.009	2		0.7435	0.0165	2		0.7625
1.3		0.9155	0.0045	2		0.871	0.014	2		0.866	0.06	2		0.8985	0.0185	2		0.8605	0.0195	2		0.8845	0.0045	2		0.8695	0.0045	2			1.3		0.8275	0.0205	2		0.7295	0.0005	2		0.804	0.009	2		0.744	0.016	2		0.762
1.317		0.916	0.005	2		0.8745	0.0105	2		0.869	0.062	2		0.902	0.019	2		0.863	0.014	2		0.884	0.007	2		0.8705	0.0075	2			1.317		0.825	0.024	2		0.7295	0.0005	2		0.805	0.009	2		0.743	0.016	2		0.7615
1.333		0.914	0.004	2		0.873	0.012	2		0.8705	0.0625	2		0.903	0.019	2		0.862	0.016	2		0.884	0.008	2		0.8675	0.0075	2			1.333		0.832	0.025	2		0.7235	0.0025	2		0.807	0.009	2		0.747	0.013	2		0.7595
1.35		0.915	0.003	2		0.87	0.014	2		0.8685	0.0625	2		0.9015	0.0185	2		0.859	0.019	2		0.8825	0.0075	2		0.87	0.003	2			1.35		0.828	0.02	2		0.7255	0.0005	2		0.802	0.009	2		0.743	0.012	2		0.76
1.367		0.9135	0.0035	2		0.8675	0.0145	2		0.8655	0.0605	2		0.9015	0.0175	2		0.853	0.017	2		0.884	0.008	2		0.8675	0.0025	2			1.367		0.827	0.019	2		0.7265	0.0025	2		0.803	0.009	2		0.7425	0.0115	2		0.7565
1.383		0.9145	0.0005	2		0.8695	0.0145	2		0.869	0.062	2		0.9005	0.0175	2		0.855	0.016	2		0.883	0.006	2		0.867	0.008	2			1.383		0.8225	0.0215	2		0.7235	0.0005	2		0.802	0.009	2		0.744	0.012	2		0.7565
1.4		0.915	0	2		0.8665	0.0155	2		0.87	0.063	2		0.8985	0.0185	2		0.854	0.02	2		0.8815	0.0065	2		0.864	0.005	2			1.4		0.822	0.021	2		0.726	0	2		0.804	0.009	2		0.743	0.012	2		0.756
1.417		0.9135	0.0015	2		0.868	0.014	2		0.8685	0.0635	2		0.899	0.018	2		0.854	0.016	2		0.882	0.007	2		0.864	0.004	2			1.417		0.823	0.019	2		0.728	0.001	2		0.802	0.009	2		0.7415	0.0125	2		0.7535
1.433		0.912	0.003	2		0.8655	0.0145	2		0.8695	0.0615	2		0.9	0.017	2		0.8515	0.0175	2		0.8805	0.0075	2		0.864	0.007	2			1.433		0.8215	0.0195	2		0.73	0	2		0.7975	0.0095	2		0.7565	0.0115	2		0.7515
1.45		0.914	0.002	2		0.8595	0.0165	2		0.8665	0.0605	2		0.8995	0.0175	2		0.8465	0.0215	2		0.878	0.008	2		0.859	0.004	2			1.45		0.8245	0.0205	2		0.724	0.004	2		0.8	0.009	2		0.7475	0.0055	2		0.764
1.467		0.9105	0.0025	2		0.8595	0.0185	2		0.866	0.063	2		0.9	0.018	2		0.843	0.02	2		0.8765	0.0075	2		0.8615	0.0035	2			1.467		0.8215	0.0215	2		0.7225	0.0045	2		0.7975	0.0095	2		0.74	0.011	2		0.753
1.483		0.9115	0.0035	2		0.8565	0.0185	2		0.866	0.06	2		0.895	0.018	2		0.8435	0.0235	2		0.8755	0.0075	2		0.8605	0.0045	2			1.483		0.823	0.019	2		0.7265	0.0025	2		0.8	0.009	2		0.742	0.009	2		0.7545
1.5		0.9075	0.0055	2		0.8535	0.0225	2		0.867	0.064	2		0.8985	0.0175	2		0.8405	0.0285	2		0.874	0.008	2		0.8615	0.0045	2			1.5		0.819	0.021	2		0.7245	0.0005	2		0.7955	0.0095	2		0.746	0.005	2		0.752
1.517		0.911	0.003	2		0.855	0.02	2		0.867	0.063	2		0.8955	0.0185	2		0.842	0.025	2		0.8725	0.0075	2		0.859	0.005	2			1.517		0.8245	0.0225	2		0.7235	0.0005	2		0.8	0.009	2		0.743	0.006	2		0.751
1.533		0.9055	0.0045	2		0.8525	0.0235	2		0.8635	0.0625	2		0.896	0.018	2		0.8355	0.0255	2		0.872	0.009	2		0.859	0.003	2			1.533		0.8195	0.0245	2		0.721	0.002	2		0.7955	0.0095	2		0.7435	0.0065	2		0.7495
1.55		0.9105	0.0015	2		0.851	0.021	2		0.866	0.063	2		0.8955	0.0185	2		0.8365	0.0255	2		0.87	0.008	2		0.857	0.002	2			1.55		0.82	0.024	2		0.722	0.002	2		0.801	0.009	2		0.742	0.005	2		0.7505
1.567		0.909	0.002	2		0.851	0.022	2		0.865	0.062	2		0.896	0.018	2		0.836	0.026	2		0.871	0.01	2		0.855	0.006	2			1.567		0.8265	0.0175	2		0.7245	0.0005	2		0.799	0.009	2		0.7415	0.0045	2		0.7465
1.583		0.9085	0.0015	2		0.851	0.023	2		0.8665	0.0605	2		0.8925	0.0195	2		0.8325	0.0235	2		0.8705	0.0075	2		0.857	0.004	2			1.583		0.8215	0.0175	2		0.72	0.001	2		0.8	0.009	2		0.738	0.009	2		0.749
1.6		0.906	0.001	2		0.85	0.023	2		0.866	0.061	2		0.8965	0.0175	2		0.832	0.025	2		0.87	0.008	2		0.8545	0.0035	2			1.6		0.82	0.02	2		0.7195	0.0005	2		0.7985	0.0085	2		0.746	0.001	2		0.748
1.617		0.9085	0.0015	2		0.85	0.025	2		0.8635	0.0595	2		0.8925	0.0185	2		0.8305	0.0245	2		0.8685	0.0105	2		0.8565	0.0035	2			1.617		0.8215	0.0225	2		0.717	0.002	2		0.804	0.009	2		0.735	0.009	2		0.7455
1.633		0.911	0.002	2		0.851	0.022	2		0.8645	0.0585	2		0.8935	0.0175	2		0.8315	0.0215	2		0.8675	0.0105	2		0.854	0.007	2			1.633		0.8165	0.0225	2		0.718	0.001	2		0.801	0.009	2		0.739	0.006	2		0.7475
1.65		0.907	0.003	2		0.8495	0.0225	2		0.862	0.06	2		0.894	0.017	2		0.831	0.023	2		0.865	0.009	2		0.853	0.006	2			1.65		0.8185	0.0225	2		0.7195	0.0015	2		0.802	0.009	2		0.7375	0.0055	2		0.7475
1.667		0.9065	0.0035	2		0.8485	0.0235	2		0.865	0.059	2		0.8925	0.0185	2		0.826	0.02	2		0.865	0.013	2		0.8515	0.0075	2			1.667		0.819	0.023	2		0.72	0.002	2		0.803	0.009	2		0.7365	0.0045	2		0.745
1.683		0.907	0.001	2		0.8465	0.0235	2		0.863	0.059	2		0.8935	0.0175	2		0.826	0.023	2		0.8645	0.0085	2		0.8515	0.0065	2			1.683		0.818	0.022	2		0.716	0.001	2		0.8025	0.0085	2		0.73	0.01	2		0.7445
1.7		0.908	0.003	2		0.8435	0.0255	2		0.863	0.06	2		0.8915	0.0185	2		0.8215	0.0235	2		0.863	0.012	2		0.851	0.004	2			1.7		0.8195	0.0195	2		0.7155	0.0025	2		0.7965	0.0095	2		0.731	0.008	2		0.7505
1.717		0.9085	0.0025	2		0.8425	0.0255	2		0.861	0.059	2		0.8915	0.0185	2		0.821	0.025	2		0.862	0.012	2		0.852	0.004	2			1.717		0.8155	0.0185	2		0.7165	0.0025	2		0.799	0.009	2		0.7305	0.0105	2		0.7435
1.733		0.908	0.002	2		0.838	0.026	2		0.864	0.059	2		0.8915	0.0175	2		0.8175	0.0265	2		0.861	0.013	2		0.8505	0.0035	2			1.733		0.817	0.022	2		0.716	0.001	2		0.7965	0.0095	2		0.7375	0.0025	2		0.743
1.75		0.907	0.002	2		0.8415	0.0255	2		0.862	0.058	2		0.893	0.017	2		0.82	0.024	2		0.859	0.011	2		0.8485	0.0045	2			1.75		0.814	0.021	2		0.716	0.004	2		0.7955	0.0095	2		0.73	0.008	2		0.7455
1.767		0.9045	0.0035	2		0.837	0.028	2		0.861	0.058	2		0.8925	0.0165	2		0.8155	0.0275	2		0.858	0.012	2		0.85	0.004	2			1.767		0.819	0.023	2		0.719	0	2		0.7975	0.0095	2		0.7335	0.0035	2		0.744
1.783		0.9035	0.0035	2		0.837	0.028	2		0.861	0.059	2		0.8905	0.0175	2		0.813	0.025	2		0.859	0.015	2		0.846	0.005	2			1.783		0.814	0.026	2		0.719	0.001	2		0.7945	0.0095	2		0.7265	0.0095	2		0.7415
1.8		0.904	0.001	2		0.8355	0.0295	2		0.86	0.058	2		0.893	0.017	2		0.8115	0.0275	2		0.857	0.014	2		0.849	0.005	2			1.8		0.8185	0.0215	2		0.717	0.003	2		0.799	0.009	2		0.73	0.006	2		0.7415
1.817		0.905	0.002	2		0.835	0.029	2		0.8615	0.0595	2		0.8885	0.0175	2		0.8105	0.0255	2		0.8555	0.0135	2		0.847	0.003	2			1.817		0.8165	0.0215	2		0.718	0.002	2		0.7935	0.0095	2		0.725	0.011	2		0.7415
1.833		0.9055	0.0035	2		0.8345	0.0295	2		0.861	0.059	2		0.886	0.019	2		0.8095	0.0265	2		0.854	0.012	2		0.847	0.002	2			1.833		0.815	0.021	2		0.7175	0.0035	2		0.7975	0.0095	2		0.733	0.004	2		0.7415
1.85		0.9035	0.0015	2		0.833	0.03	2		0.8605	0.0575	2		0.888	0.019	2		0.808	0.027	2		0.852	0.013	2		0.845	0.002	2			1.85		0.8165	0.0195	2		0.7165	0.0005	2		0.7955	0.0095	2		0.729	0.008	2		0.74
1.867		0.903	0.002	2		0.836	0.029	2		0.861	0.058	2		0.8905	0.0185	2		0.809	0.023	2		0.8515	0.0165	2		0.8435	0.0035	2			1.867		0.812	0.023	2		0.716	0	2		0.7965	0.0095	2		0.731	0.003	2		0.741
1.883		0.9045	0.0005	2		0.8355	0.0295	2		0.8615	0.0585	2		0.8895	0.0175	2		0.809	0.024	2		0.851	0.014	2		0.8415	0.0045	2			1.883		0.815	0.022	2		0.7165	0.0055	2		0.7975	0.0095	2		0.7335	0.0005	2		0.7365
1.9		0.9005	0.0015	2		0.83	0.031	2		0.859	0.056	2		0.8875	0.0185	2		0.8045	0.0275	2		0.849	0.014	2		0.8405	0.0045	2			1.9		0.8145	0.0235	2		0.7145	0.0045	2		0.7935	0.0095	2		0.7275	0.0035	2		0.7395
1.917		0.9025	0.0015	2		0.8325	0.0295	2		0.8595	0.0575	2		0.888	0.018	2		0.805	0.024	2		0.85	0.016	2		0.8405	0.0045	2			1.917		0.814	0.019	2		0.7135	0.0005	2		0.7945	0.0095	2		0.727	0.005	2		0.74
1.933		0.902	0.002	2		0.829	0.029	2		0.8565	0.0565	2		0.8855	0.0185	2		0.8025	0.0245	2		0.8485	0.0175	2		0.8415	0.0055	2			1.933		0.8145	0.0215	2		0.7095	0.0015	2		0.7945	0.0095	2		0.7285	0.0035	2		0.739
1.95		0.9035	0.0005	2		0.829	0.032	2		0.86	0.057	2		0.888	0.019	2		0.7995	0.0255	2		0.849	0.016	2		0.8415	0.0055	2			1.95		0.8115	0.0225	2		0.711	0	2		0.7935	0.0095	2		0.73	0.001	2		0.741
1.967		0.9025	0.0005	2		0.8295	0.0295	2		0.8585	0.0565	2		0.887	0.019	2		0.8	0.022	2		0.8455	0.0185	2		0.838	0.003	2			1.967		0.8115	0.0205	2		0.7125	0.0015	2		0.806	0.009	2		0.727	0.002	2		0.7445
1.983		0.902	0.003	2		0.8265	0.0315	2		0.8605	0.0565	2		0.884	0.019	2		0.797	0.024	2		0.843	0.022	2		0.839	0.004	2			1.983		0.813	0.02	2		0.71	0.003	2		0.803	0.009	2		0.73	0.001	2		0.7385
2		0.8995	0.0015	2		0.8225	0.0315	2		0.8585	0.0545	2		0.8865	0.0175	2		0.7935	0.0255	2		0.8455	0.0185	2		0.8375	0.0035	2			2		0.8115	0.0215	2		0.7105	0.0005	2		0.7945	0.0095	2		0.726	0.003	2		0.7395
2.017		0.8995	0.0015	2		0.827	0.034	2		0.8565	0.0565	2		0.886	0.017	2		0.7955	0.0255	2		0.8445	0.0165	2		0.835	0.002	2			2.017		0.812	0.021	2		0.7105	0.0015	2		0.7945	0.0095	2		0.7225	0.0065	2		0.739
2.033		0.898	0.002	2		0.822	0.034	2		0.8575	0.0555	2		0.8835	0.0185	2		0.791	0.027	2		0.844	0.02	2		0.834	0.004	2			2.033		0.8075	0.0245	2		0.7095	0.0035	2		0.7955	0.0095	2		0.733	0.005	2		0.7395
2.05		0.901	0.003	2		0.82	0.035	2		0.857	0.056	2		0.885	0.018	2		0.789	0.028	2		0.841	0.02	2		0.835	0.006	2			2.05		0.8075	0.0225	2		0.713	0.002	2		0.7965	0.0095	2		0.7265	0.0015	2		0.7385
2.067		0.8995	0.0015	2		0.8205	0.0335	2		0.855	0.055	2		0.883	0.018	2		0.7895	0.0255	2		0.8375	0.0215	2		0.8345	0.0045	2			2.067		0.808	0.02	2		0.7245	0.0125	2		0.7975	0.0095	2		0.7285	0.0005	2		0.738
2.083		0.8955	0.0045	2		0.8195	0.0335	2		0.8545	0.0545	2		0.8795	0.0185	2		0.7885	0.0255	2		0.838	0.021	2		0.831	0.003	2			2.083		0.807	0.021	2		0.722	0.007	2		0.799	0.009	2		0.725	0	2		0.7355
2.1		0.897	0.002	2		0.82	0.033	2		0.857	0.053	2		0.8835	0.0175	2		0.7885	0.0255	2		0.8395	0.0215	2		0.832	0.003	2			2.1		0.807	0.02	2		0.711	0.003	2		0.7975	0.0095	2		0.7265	0.0005	2		0.7375
2.117		0.899	0.002	2		0.818	0.037	2		0.8545	0.0545	2		0.8815	0.0185	2		0.783	0.027	2		0.838	0.022	2		0.831	0.002	2			2.117		0.806	0.02	2		0.7115	0.0045	2		0.7975	0.0095	2		0.724	0	2		0.736
2.133		0.8985	0.0025	2		0.819	0.036	2		0.8565	0.0555	2		0.8805	0.0185	2		0.7825	0.0235	2		0.8335	0.0215	2		0.8305	0.0005	2			2.133		0.8085	0.0225	2		0.711	0.003	2		0.798	0.01	2		0.7245	0.0005	2		0.7375
2.15		0.898	0.002	2		0.816	0.037	2		0.8525	0.0525	2		0.8805	0.0185	2		0.781	0.026	2		0.8325	0.0185	2		0.8305	0.0005	2			2.15		0.8055	0.0205	2		0.7115	0.0035	2		0.8	0.009	2		0.728	0.004	2		0.741
2.167		0.899	0.001	2		0.816	0.038	2		0.855	0.055	2		0.882	0.018	2		0.7795	0.0255	2		0.831	0.021	2		0.831	0.001	2			2.167		0.8035	0.0235	2		0.711	0.007	2		0.801	0.009	2		0.753	0.029	2		0.74
2.183		0.896	0.002	2		0.8145	0.0365	2		0.853	0.053	2		0.8815	0.0175	2		0.7775	0.0245	2		0.832	0.021	2		0.83	0	2			2.183		0.804	0.021	2		0.712	0.001	2		0.8	0.009	2		0.735	0.013	2		0.737
2.2		0.8955	0.0025	2		0.816	0.036	2		0.852	0.054	2		0.882	0.018	2		0.776	0.021	2		0.8325	0.0225	2		0.8265	0.0005	2			2.2		0.802	0.023	2		0.711	0.004	2		0.802	0.009	2		0.7255	0.0065	2		0.739
2.217		0.8975	0.0015	2		0.8145	0.0385	2		0.851	0.054	2		0.8795	0.0185	2		0.776	0.025	2		0.829	0.023	2		0.8275	0.0025	2			2.217		0.8025	0.0215	2		0.7095	0.0035	2		0.802	0.009	2		0.7245	0.0045	2		0.736
2.233		0.897	0.003	2		0.8155	0.0355	2		0.852	0.053	2		0.8795	0.0185	2		0.7755	0.0205	2		0.829	0.024	2		0.826	0.004	2			2.233		0.803	0.024	2		0.7105	0.0015	2		0.7965	0.0095	2		0.7455	0.0255	2		0.741
2.25		0.8955	0.0025	2		0.8115	0.0375	2		0.853	0.052	2		0.8815	0.0175	2		0.7725	0.0235	2		0.824	0.024	2		0.824	0.002	2			2.25		0.8035	0.0225	2		0.7065	0.0005	2		0.7975	0.0095	2		0.7275	0.0055	2		0.7385
2.267		0.8945	0.0005	2		0.809	0.041	2		0.8525	0.0535	2		0.8785	0.0185	2		0.768	0.025	2		0.825	0.025	2		0.824	0.003	2			2.267		0.8015	0.0225	2		0.707	0.005	2		0.8	0.009	2		0.7235	0.0035	2		0.7395
2.283		0.896	0.002	2		0.8105	0.0415	2		0.8505	0.0505	2		0.879	0.017	2		0.767	0.024	2		0.8235	0.0285	2		0.8225	0.0035	2			2.283		0.8015	0.0205	2		0.7105	0.0005	2		0.796	0.009	2		0.7205	0.0015	2		0.7375
2.3		0.895	0.004	2		0.8085	0.0425	2		0.852	0.051	2		0.88	0.018	2		0.7655	0.0255	2		0.8235	0.0275	2		0.8205	0.0035	2			2.3		0.8015	0.0195	2		0.707	0.007	2		0.799	0.009	2		0.721	0.003	2		0.7415
2.317		0.894	0.004	2		0.804	0.041	2		0.8505	0.0505	2		0.878	0.018	2		0.76	0.024	2		0.8205	0.0285	2		0.8205	0.0025	2			2.317		0.802	0.021	2		0.7065	0.0015	2		0.7965	0.0095	2		0.7225	0.0055	2		0.7365
2.333		0.8935	0.0055	2		0.8045	0.0405	2		0.8485	0.0485	2		0.8775	0.0185	2		0.761	0.023	2		0.821	0.029	2		0.82	0.001	2			2.333		0.8015	0.0225	2		0.704	0	2		0.797	0.009	2		0.7205	0.0045	2		0.737
2.35		0.894	0.003	2		0.8045	0.0425	2		0.85	0.05	2		0.877	0.018	2		0.759	0.023	2		0.8215	0.0295	2		0.8205	0.0025	2			2.35		0.7995	0.0225	2		0.708	0.001	2		0.7935	0.0115	2		0.7215	0.0045	2		0.738
2.367		0.8965	0.0025	2		0.803	0.042	2		0.849	0.049	2		0.874	0.019	2		0.757	0.023	2		0.8175	0.0305	2		0.819	0.002	2			2.367		0.8	0.023	2		0.7065	0.0035	2		0.7965	0.0095	2		0.72	0.003	2		0.7395
2.383		0.894	0.003	2		0.7985	0.0435	2		0.8485	0.0485	2		0.876	0.017	2		0.7535	0.0255	2		0.8185	0.0315	2		0.8185	0.0025	2			2.383		0.799	0.02	2		0.704	0.002	2		0.7975	0.0095	2		0.7245	0.0075	2		0.737
2.4		0.892	0.006	2		0.799	0.044	2		0.848	0.049	2		0.8775	0.0165	2		0.7515	0.0245	2		0.812	0.032	2		0.816	0.004	2			2.4		0.796	0.022	2		0.7095	0.0035	2		0.799	0.009	2		0.722	0.003	2		0.738
2.417		0.893	0.002	2		0.802	0.045	2		0.8485	0.0485	2		0.876	0.017	2		0.7535	0.0235	2		0.812	0.031	2		0.8165	0.0015	2			2.417		0.795	0.025	2		0.7095	0.0065	2		0.7975	0.0095	2		0.719	0.004	2		0.735
2.433		0.8935	0.0025	2		0.801	0.044	2		0.847	0.048	2		0.8775	0.0175	2		0.752	0.022	2		0.8135	0.0325	2		0.8155	0.0015	2			2.433		0.7965	0.0225	2		0.706	0.001	2		0.7955	0.0095	2		0.722	0.007	2		0.735
2.45		0.893	0.002	2		0.7995	0.0455	2		0.848	0.048	2		0.8765	0.0175	2		0.7495	0.0225	2		0.811	0.035	2		0.814	0.001	2			2.45		0.7955	0.0225	2		0.7015	0.0005	2		0.7955	0.0095	2		0.7185	0.0065	2		0.736
2.467		0.893	0.002	2		0.8015	0.0435	2		0.847	0.049	2		0.875	0.017	2		0.7495	0.0185	2		0.8105	0.0345	2		0.816	0.001	2			2.467		0.7955	0.0245	2		0.702	0.002	2		0.7965	0.0095	2		0.7225	0.0075	2		0.7365
2.483		0.8915	0.0015	2		0.8005	0.0465	2		0.8475	0.0495	2		0.8745	0.0175	2		0.7465	0.0195	2		0.8095	0.0345	2		0.8135	0.0005	2			2.483		0.796	0.024	2		0.7	0.001	2		0.7975	0.0095	2		0.7245	0.0105	2		0.7335
2.5		0.895	0.003	2		0.8005	0.0425	2		0.846	0.049	2		0.875	0.017	2		0.7485	0.0175	2		0.8045	0.0335	2		0.8095	0.0015	2			2.5		0.7945	0.0235	2		0.7	0	2		0.7935	0.0095	2		0.7255	0.0105	2		0.7365
2.517		0.893	0.002	2		0.7995	0.0465	2		0.8475	0.0485	2		0.8725	0.0175	2		0.744	0.018	2		0.8045	0.0345	2		0.8135	0.0025	2			2.517		0.796	0.023	2		0.6995	0.0015	2		0.7955	0.0095	2		0.7175	0.0075	2		0.7345
2.533		0.896	0.004	2		0.799	0.047	2		0.8455	0.0485	2		0.8725	0.0175	2		0.743	0.019	2		0.801	0.038	2		0.813	0.001	2			2.533		0.795	0.022	2		0.697	0.001	2		0.7915	0.0095	2		0.755	0.032	2		0.732
2.55		0.893	0.003	2		0.795	0.05	2		0.8425	0.0485	2		0.874	0.017	2		0.7375	0.0215	2		0.8035	0.0375	2		0.8115	0.0005	2			2.55		0.795	0.023	2		0.696	0.002	2		0.7975	0.0095	2		0.7135	0.0025	2		0.736
2.567		0.892	0.002	2		0.795	0.048	2		0.8435	0.0465	2		0.8745	0.0165	2		0.739	0.02	2		0.8005	0.0365	2		0.8095	0.0005	2			2.567		0.7955	0.0215	2		0.699	0.005	2		0.7955	0.0095	2		0.715	0.005	2		0.731
2.583		0.89	0.002	2		0.7945	0.0515	2		0.8445	0.0475	2		0.8725	0.0175	2		0.7355	0.0205	2		0.7995	0.0375	2		0.8085	0.0005	2			2.583		0.793	0.024	2		0.6995	0.0035	2		0.7945	0.0095	2		0.716	0.007	2		0.7315
2.6		0.889	0.001	2		0.793	0.05	2		0.8455	0.0475	2		0.872	0.018	2		0.733	0.019	2		0.797	0.04	2		0.8095	0.0005	2			2.6		0.7955	0.0175	2		0.6965	0.0015	2		0.7925	0.0095	2		0.716	0.004	2		0.732
2.617		0.8905	0.0015	2		0.7915	0.0495	2		0.841	0.048	2		0.8675	0.0185	2		0.731	0.018	2		0.7975	0.0425	2		0.8095	0.0015	2			2.617		0.7915	0.0245	2		0.699	0.003	2		0.7955	0.0095	2		0.7125	0.0035	2		0.731
2.633		0.891	0.001	2		0.789	0.047	2		0.8435	0.0455	2		0.8705	0.0175	2		0.7305	0.0165	2		0.796	0.04	2		0.808	0.001	2			2.633		0.7915	0.0215	2		0.6965	0.0055	2		0.7935	0.0095	2		0.7125	0.0045	2		0.7295
2.65		0.8905	0.0005	2		0.79	0.049	2		0.8415	0.0455	2		0.8705	0.0185	2		0.728	0.016	2		0.7925	0.0415	2		0.8065	0.0005	2			2.65		0.7945	0.0225	2		0.6975	0.0005	2		0.7945	0.0095	2		0.7185	0.0085	2		0.731
2.667		0.889	0.003	2		0.787	0.049	2		0.842	0.044	2		0.869	0.018	2		0.7275	0.0185	2		0.7925	0.0425	2		0.8055	0.0005	2			2.667		0.789	0.023	2		0.694	0.001	2		0.7965	0.0095	2		0.7145	0.0075	2		0.7285
2.683		0.89	0.001	2		0.789	0.05	2		0.842	0.046	2		0.868	0.018	2		0.7245	0.0145	2		0.7915	0.0455	2		0.8055	0.0005	2			2.683		0.7895	0.0235	2		0.698	0.005	2		0.7935	0.0095	2		0.713	0.004	2		0.7295
2.7		0.887	0.004	2		0.7865	0.0505	2		0.8385	0.0435	2		0.871	0.018	2		0.7245	0.0185	2		0.7895	0.0455	2		0.8045	0.0005	2			2.7		0.791	0.024	2		0.6965	0.0025	2		0.7925	0.0095	2		0.712	0.002	2		0.731
2.717		0.89	0.003	2		0.7845	0.0495	2		0.8395	0.0455	2		0.8715	0.0165	2		0.72	0.015	2		0.788	0.047	2		0.8055	0.0005	2			2.717		0.7905	0.0225	2		0.695	0	2		0.7895	0.0095	2		0.714	0.003	2		0.73
2.733		0.888	0.002	2		0.7845	0.0535	2		0.841	0.043	2		0.871	0.017	2		0.7175	0.0165	2		0.7865	0.0465	2		0.8015	0.0005	2			2.733		0.7875	0.0255	2		0.6945	0.0005	2		0.7935	0.0095	2		0.7145	0.0075	2		0.7285
2.75		0.89	0.003	2		0.7825	0.0525	2		0.8405	0.0455	2		0.8685	0.0175	2		0.717	0.017	2		0.785	0.049	2		0.8005	0.0015	2			2.75		0.784	0.027	2		0.6965	0.0015	2		0.7935	0.0095	2		0.716	0.011	2		0.7285
2.767		0.887	0.003	2		0.7835	0.0535	2		0.841	0.044	2		0.869	0.017	2		0.7155	0.0155	2		0.783	0.045	2		0.8015	0.0005	2			2.767		0.786	0.026	2		0.696	0.005	2		0.7895	0.0095	2		0.7105	0.0025	2		0.728
2.783		0.8885	0.0045	2		0.7835	0.0535	2		0.839	0.045	2		0.8685	0.0165	2		0.7145	0.0145	2		0.7815	0.0475	2		0.8005	0.0005	2			2.783		0.79	0.026	2		0.695	0.002	2		0.7895	0.0095	2		0.712	0.007	2		0.7265
2.8		0.8875	0.0045	2		0.7815	0.0535	2		0.8395	0.0445	2		0.865	0.018	2		0.711	0.013	2		0.78	0.05	2		0.8015	0.0015	2			2.8		0.783	0.026	2		0.697	0.002	2		0.785	0.01	2		0.7125	0.0045	2		0.7255
2.817		0.887	0.003	2		0.7835	0.0535	2		0.838	0.045	2		0.8665	0.0175	2		0.7125	0.0125	2		0.78	0.048	2		0.7995	0.0005	2			2.817		0.7875	0.0215	2		0.6975	0.0035	2		0.7845	0.0095	2		0.7095	0.0035	2		0.7245
2.833		0.888	0.002	2		0.783	0.053	2		0.8395	0.0445	2		0.8685	0.0165	2		0.7125	0.0125	2		0.7775	0.0485	2		0.7975	0.0005	2			2.833		0.785	0.024	2		0.697	0.003	2		0.786	0.01	2		0.7095	0.0095	2		0.725
2.85		0.8875	0.0035	2		0.783	0.053	2		0.8375	0.0435	2		0.8675	0.0175	2		0.7105	0.0105	2		0.775	0.053	2		0.798	0	2			2.85		0.7845	0.0275	2		0.698	0.004	2		0.787	0.01	2		0.7065	0.0025	2		0.7255
2.867		0.8885	0.0045	2		0.7805	0.0525	2		0.8385	0.0435	2		0.865	0.018	2		0.7085	0.0115	2		0.773	0.053	2		0.796	0.002	2			2.867		0.785	0.025	2		0.6975	0.0065	2		0.788	0.01	2		0.71	0.009	2		0.7255
2.883		0.886	0.001	2		0.781	0.056	2		0.84	0.043	2		0.8665	0.0165	2		0.7055	0.0115	2		0.7755	0.0535	2		0.7965	0.0005	2			2.883		0.7845	0.0245	2		0.697	0.006	2		0.7915	0.0095	2		0.7085	0.0065	2		0.7225
2.9		0.887	0.002	2		0.7825	0.0525	2		0.837	0.04	2		0.867	0.017	2		0.7065	0.0065	2		0.772	0.054	2		0.7955	0.0015	2			2.9		0.784	0.023	2		0.6955	0.0035	2		0.7925	0.0095	2		0.7055	0.0045	2		0.7225
2.917		0.8855	0.0015	2		0.7785	0.0545	2		0.8375	0.0415	2		0.867	0.017	2		0.7025	0.0095	2		0.7715	0.0555	2		0.7945	0.0015	2			2.917		0.7855	0.0255	2		0.694	0	2		0.7885	0.0105	2		0.71	0.009	2		0.7225
2.933		0.886	0.002	2		0.778	0.054	2		0.837	0.041	2		0.8685	0.0165	2		0.7005	0.0075	2		0.77	0.057	2		0.794	0.001	2			2.933		0.7875	0.0245	2		0.694	0.003	2		0.792	0.009	2		0.706	0.001	2		0.7235
2.95		0.882	0.001	2		0.7765	0.0555	2		0.837	0.043	2		0.8665	0.0185	2		0.698	0.008	2		0.7655	0.0575	2		0.7925	0.0015	2			2.95		0.7855	0.0275	2		0.695	0.003	2		0.794	0.01	2		0.709	0.008	2		0.724
2.967		0.8865	0.0025	2		0.775	0.056	2		0.837	0.041	2		0.8655	0.0165	2		0.6985	0.0105	2		0.7655	0.0575	2		0.7915	0.0005	2			2.967		0.7825	0.0255	2		0.692	0.001	2		0.7885	0.0095	2		0.708	0.009	2		0.7225
2.983		0.884	0	2		0.7745	0.0565	2		0.8385	0.0425	2		0.863	0.017	2		0.6955	0.0085	2		0.7655	0.0585	2		0.7905	0.0005	2			2.983		0.7815	0.0275	2		0.692	0.003	2		0.789	0.009	2		0.7065	0.0085	2		0.7185
3		0.884	0.001	2		0.7745	0.0575	2		0.837	0.042	2		0.863	0.018	2		0.6925	0.0065	2		0.764	0.058	2		0.7915	0.0005	2			3		0.7815	0.0265	2		0.693	0.003	2		0.7875	0.0085	2		0.701	0.002	2		0.7195
3.017		0.883	0	2		0.7735	0.0575	2		0.8345	0.0405	2		0.864	0.017	2		0.691	0.007	2		0.7595	0.0565	2		0.7905	0.0015	2			3.017		0.782	0.027	2		0.695	0.001	2		0.7865	0.0115	2		0.7075	0.0075	2		0.719
3.033		0.883	0.002	2		0.7705	0.0575	2		0.8335	0.0415	2		0.8645	0.0175	2		0.688	0.007	2		0.759	0.06	2		0.79	0.001	2			3.033		0.7835	0.0245	2		0.693	0.003	2		0.786	0.008	2		0.7045	0.0045	2		0.717
3.05		0.8835	0.0025	2		0.77	0.058	2		0.8355	0.0415	2		0.8615	0.0175	2		0.6875	0.0075	2		0.76	0.063	2		0.7885	0.0015	2			3.05		0.7815	0.0275	2		0.69	0.001	2		0.7855	0.0105	2		0.696	0.001	2		0.7195
3.067		0.8825	0.0035	2		0.769	0.059	2		0.8345	0.0375	2		0.8635	0.0165	2		0.686	0.008	2		0.7585	0.0635	2		0.789	0.002	2			3.067		0.782	0.024	2		0.6915	0.0015	2		0.787	0.01	2		0.7025	0.0065	2		0.72
3.083		0.885	0.002	2		0.771	0.058	2		0.835	0.039	2		0.861	0.018	2		0.685	0.004	2		0.7555	0.0635	2		0.7865	0.0015	2			3.083		0.7815	0.0295	2		0.6895	0.0015	2		0.788	0.01	2		0.7095	0.0125	2		0.718
3.1		0.8825	0.0005	2		0.77	0.058	2		0.836	0.041	2		0.861	0.017	2		0.6845	0.0045	2		0.7545	0.0645	2		0.787	0.002	2			3.1		0.78	0.025	2		0.6925	0.0025	2		0.787	0.008	2		0.703	0.006	2		0.72
3.117		0.884	0.001	2		0.7705	0.0595	2		0.8335	0.0395	2		0.862	0.017	2		0.6835	0.0045	2		0.7535	0.0645	2		0.7825	0.0045	2			3.117		0.779	0.027	2		0.6895	0.0015	2		0.783	0.009	2		0.7055	0.0065	2		0.7145
3.133		0.88	0.001	2		0.7665	0.0605	2		0.834	0.038	2		0.857	0.017	2		0.679	0.006	2		0.752	0.067	2		0.785	0.002	2			3.133		0.7805	0.0265	2		0.693	0	2		0.7875	0.0095	2		0.7045	0.0055	2		0.7155
3.15		0.8835	0.0005	2		0.768	0.058	2		0.835	0.037	2		0.857	0.018	2		0.6795	0.0025	2		0.7505	0.0665	2		0.7845	0.0015	2			3.15		0.778	0.027	2		0.69	0	2		0.7865	0.0105	2		0.7035	0.0055	2		0.719
3.167		0.8815	0.0005	2		0.7635	0.0615	2		0.8335	0.0375	2		0.8605	0.0165	2		0.676	0.007	2		0.7475	0.0665	2		0.784	0.003	2			3.167		0.7795	0.0275	2		0.6895	0.0015	2		0.7895	0.0095	2		0.705	0.01	2		0.717
3.183		0.882	0.002	2		0.7635	0.0595	2		0.832	0.04	2		0.8595	0.0165	2		0.6755	0.0045	2		0.746	0.07	2		0.7815	0.0045	2			3.183		0.7825	0.0235	2		0.692	0.002	2		0.7875	0.0105	2		0.705	0.011	2		0.715
3.2		0.8815	0.0025	2		0.7675	0.0585	2		0.831	0.038	2		0.8585	0.0175	2		0.677	0	2		0.7455	0.0685	2		0.781	0.002	2			3.2		0.778	0.024	2		0.6895	0.0005	2		0.784	0.009	2		0.696	0.005	2		0.7135
3.217		0.8835	0.0015	2		0.765	0.062	2		0.832	0.038	2		0.859	0.017	2		0.672	0.002	2		0.742	0.071	2		0.782	0.001	2			3.217		0.7785	0.0265	2		0.6905	0.0025	2		0.7795	0.0085	2		0.7055	0.0125	2		0.714
3.233		0.8815	0.0005	2		0.7635	0.0625	2		0.8325	0.0385	2		0.8565	0.0175	2		0.6705	0.0035	2		0.7415	0.0705	2		0.7815	0.0015	2			3.233		0.7775	0.0255	2		0.6885	0.0055	2		0.781	0.01	2		0.7015	0.0065	2		0.715
3.25		0.8795	0.0015	2		0.7595	0.0635	2		0.8315	0.0345	2		0.8575	0.0175	2		0.667	0.005	2		0.7395	0.0715	2		0.7815	0.0025	2			3.25		0.7795	0.0265	2		0.685	0.002	2		0.782	0.009	2		0.7	0.006	2		0.7135
3.267		0.8815	0.0005	2		0.7595	0.0615	2		0.832	0.039	2		0.858	0.017	2		0.666	0.002	2		0.74	0.072	2		0.7785	0.0025	2			3.267		0.778	0.027	2		0.6875	0.0035	2		0.7845	0.0085	2		0.7005	0.0075	2		0.7165
3.283		0.878	0.002	2		0.76	0.064	2		0.8315	0.0375	2		0.859	0.017	2		0.664	0.002	2		0.7375	0.0725	2		0.7785	0.0015	2			3.283		0.7765	0.0265	2		0.6885	0.0025	2		0.7835	0.0105	2		0.6985	0.0075	2		0.713
3.3		0.8805	0.0025	2		0.7575	0.0625	2		0.8315	0.0335	2		0.8595	0.0175	2		0.663	0.002	2		0.7375	0.0735	2		0.7795	0.0035	2			3.3		0.7755	0.0265	2		0.6905	0.0045	2		0.7845	0.0105	2		0.708	0.013	2		0.712
3.317		0.8785	0.0005	2		0.7585	0.0665	2		0.829	0.036	2		0.8575	0.0185	2		0.6595	0.0015	2		0.734	0.075	2		0.779	0.001	2			3.317		0.7765	0.0275	2		0.687	0.004	2		0.7845	0.0105	2		0.6975	0.0065	2		0.716
3.333		0.88	0.001	2		0.757	0.065	2		0.829	0.035	2		0.856	0.017	2		0.6585	0.0015	2		0.7335	0.0745	2		0.7775	0.0005	2			3.333		0.777	0.029	2		0.6885	0.0015	2		0.7855	0.0105	2		0.6985	0.0045	2		0.7145
3.35		0.8795	0.0015	2		0.757	0.065	2		0.8285	0.0355	2		0.8545	0.0175	2		0.6575	0.0005	2		0.732	0.076	2		0.774	0.001	2			3.35		0.776	0.029	2		0.6865	0.0045	2		0.7845	0.0085	2		0.705	0.011	2		0.713
3.367		0.8785	0.0015	2		0.7565	0.0655	2		0.829	0.036	2		0.8565	0.0175	2		0.657	0	2		0.7295	0.0755	2		0.7775	0.0035	2			3.367		0.7775	0.0275	2		0.6865	0.0045	2		0.782	0.009	2		0.7	0.006	2		0.7145
3.383		0.8805	0.0005	2		0.7565	0.0665	2		0.8285	0.0375	2		0.8525	0.0185	2		0.655	0.001	2		0.7285	0.0785	2		0.775	0.003	2			3.383		0.776	0.029	2		0.6865	0.0025	2		0.784	0.01	2		0.696	0.005	2		0.7135
3.4		0.879	0.002	2		0.753	0.067	2		0.83	0.034	2		0.8565	0.0175	2		0.65	0.001	2		0.726	0.078	2		0.7755	0.0035	2			3.4		0.773	0.03	2		0.6835	0.0015	2		0.7785	0.0105	2		0.7005	0.0105	2		0.7145
3.417		0.8795	0.0015	2		0.754	0.067	2		0.829	0.035	2		0.854	0.018	2		0.6495	0.0025	2		0.7285	0.0785	2		0.773	0	2			3.417		0.7765	0.0275	2		0.6845	0.0005	2		0.782	0.01	2		0.698	0.009	2		0.7125
3.433		0.879	0.001	2		0.7545	0.0665	2		0.8295	0.0335	2		0.853	0.017	2		0.6505	0.0025	2		0.7235	0.0805	2		0.7735	0.0015	2			3.433		0.778	0.029	2		0.6875	0.0045	2		0.7815	0.0095	2		0.6935	0.0045	2		0.7135
3.45		0.876	0.001	2		0.7495	0.0685	2		0.8285	0.0355	2		0.8525	0.0175	2		0.646	0	2		0.7245	0.0825	2		0.7735	0.0015	2			3.45		0.7735	0.0285	2		0.682	0.001	2		0.781	0.01	2		0.6945	0.0025	2		0.712
3.467		0.8755	0.0005	2		0.7505	0.0695	2		0.8285	0.0355	2		0.8515	0.0185	2		0.644	0.001	2		0.722	0.079	2		0.771	0.003	2			3.467		0.773	0.026	2		0.6865	0.0015	2		0.7815	0.0095	2		0.697	0.006	2		0.7125
3.483		0.878	0.003	2		0.7505	0.0685	2		0.8285	0.0355	2		0.852	0.018	2		0.6435	0.0035	2		0.7215	0.0835	2		0.769	0.004	2			3.483		0.7735	0.0265	2		0.687	0.001	2		0.7795	0.0125	2		0.6995	0.0105	2		0.7115
3.5		0.8795	0.0005	2		0.7515	0.0685	2		0.8275	0.0345	2		0.8535	0.0175	2		0.6435	0.0045	2		0.7185	0.0845	2		0.7695	0.0035	2			3.5		0.773	0.027	2		0.6835	0.0015	2		0.7815	0.0105	2		0.695	0.008	2		0.71
3.517		0.878	0	2		0.75	0.069	2		0.827	0.033	2		0.851	0.019	2		0.6415	0.0045	2		0.7165	0.0835	2		0.768	0.004	2			3.517		0.771	0.027	2		0.686	0.002	2		0.7795	0.0135	2		0.697	0.008	2		0.708
3.533		0.878	0.001	2		0.7495	0.0685	2		0.8275	0.0325	2		0.8515	0.0165	2		0.6395	0.0065	2		0.7145	0.0835	2		0.769	0.005	2			3.533		0.773	0.025	2		0.687	0.001	2		0.78	0.013	2		0.695	0.009	2		0.708
3.55		0.8775	0.0015	2		0.7485	0.0705	2		0.8275	0.0335	2		0.8525	0.0165	2		0.6365	0.0055	2		0.716	0.086	2		0.7705	0.0015	2			3.55		0.7755	0.0285	2		0.6835	0.0035	2		0.7815	0.0135	2		0.698	0.011	2		0.7075
3.567		0.876	0.001	2		0.7465	0.0705	2		0.826	0.033	2		0.851	0.017	2		0.635	0.004	2		0.7145	0.0855	2		0.7695	0.0025	2			3.567		0.772	0.028	2		0.684	0.003	2		0.7845	0.0095	2		0.6955	0.0095	2		0.706
3.583		0.8765	0.0005	2		0.747	0.071	2		0.828	0.031	2		0.8525	0.0175	2		0.6335	0.0065	2		0.7115	0.0875	2		0.766	0.005	2			3.583		0.7725	0.0285	2		0.685	0.004	2		0.783	0.009	2		0.6935	0.0045	2		0.707
3.6		0.8755	0.0005	2		0.7495	0.0685	2		0.8265	0.0335	2		0.8515	0.0175	2		0.6355	0.0095	2		0.7105	0.0875	2		0.7645	0.0015	2			3.6		0.7705	0.0255	2		0.683	0.003	2		0.7795	0.0105	2		0.6965	0.0105	2		0.7045
3.617		0.876	0	2		0.7465	0.0695	2		0.8255	0.0315	2		0.8505	0.0185	2		0.6335	0.0075	2		0.709	0.088	2		0.7665	0.0015	2			3.617		0.7705	0.0275	2		0.685	0.004	2		0.7845	0.0095	2		0.696	0.012	2		0.7045
3.633		0.8765	0.0005	2		0.7445	0.0695	2		0.8245	0.0315	2		0.8475	0.0185	2		0.6305	0.0085	2		0.7085	0.0905	2		0.7625	0.0025	2			3.633		0.7735	0.0265	2		0.684	0.004	2		0.7815	0.0105	2		0.695	0.01	2		0.702
3.65		0.874	0	2		0.7425	0.0685	2		0.8245	0.0325	2		0.851	0.017	2		0.629	0.009	2		0.706	0.09	2		0.764	0.001	2			3.65		0.771	0.03	2		0.682	0.003	2		0.779	0.01	2		0.6915	0.0065	2		0.703
3.667		0.875	0.001	2		0.7415	0.0715	2		0.824	0.028	2		0.8485	0.0165	2		0.6265	0.0065	2		0.7025	0.0905	2		0.7615	0.0025	2			3.667		0.7725	0.0325	2		0.6845	0.0035	2		0.778	0.009	2		0.6945	0.0075	2		0.7025
3.683		0.875	0.001	2		0.7385	0.0685	2		0.8245	0.0295	2		0.849	0.017	2		0.6245	0.0085	2		0.702	0.092	2		0.763	0.003	2			3.683		0.772	0.031	2		0.682	0	2		0.7755	0.0095	2		0.694	0.008	2		0.7025
3.7		0.8755	0.0015	2		0.742	0.069	2		0.8225	0.0315	2		0.8475	0.0165	2		0.6255	0.0115	2		0.702	0.092	2		0.7605	0.0015	2			3.7		0.7725	0.0275	2		0.684	0.005	2		0.7755	0.0095	2		0.6915	0.0075	2		0.7025
3.717		0.873	0.001	2		0.7415	0.0705	2		0.8225	0.0305	2		0.8475	0.0175	2		0.622	0.012	2		0.6985	0.0935	2		0.7615	0.0035	2			3.717		0.7715	0.0265	2		0.6835	0.0035	2		0.7765	0.0095	2		0.691	0.008	2		0.702
3.733		0.873	0.001	2		0.739	0.071	2		0.825	0.028	2		0.8475	0.0175	2		0.621	0.01	2		0.6975	0.0955	2		0.762	0.003	2			3.733		0.771	0.029	2		0.6835	0.0035	2		0.776	0.011	2		0.69	0.006	2		0.7015
3.75		0.8755	0.0015	2		0.7385	0.0745	2		0.8205	0.0285	2		0.8475	0.0185	2		0.617	0.01	2		0.6975	0.0935	2		0.761	0.001	2			3.75		0.77	0.028	2		0.6805	0.0025	2		0.777	0.011	2		0.6925	0.0085	2		0.6995
3.767		0.875	0.002	2		0.7385	0.0715	2		0.8215	0.0315	2		0.8465	0.0165	2		0.619	0.011	2		0.695	0.095	2		0.761	0.004	2			3.767		0.773	0.027	2		0.684	0.005	2		0.7765	0.0105	2		0.6905	0.0075	2		0.7005
3.783		0.875	0.001	2		0.7355	0.0755	2		0.8225	0.0295	2		0.846	0.018	2		0.614	0.008	2		0.694	0.096	2		0.7575	0.0025	2			3.783		0.7685	0.0255	2		0.6775	0.0035	2		0.7775	0.0095	2		0.692	0.008	2		0.7015
3.8		0.8745	0.0015	2		0.734	0.075	2		0.821	0.028	2		0.8445	0.0185	2		0.612	0.009	2		0.6935	0.0965	2		0.7575	0.0015	2			3.8		0.772	0.028	2		0.6765	0.0015	2		0.7765	0.0095	2		0.6955	0.0115	2		0.7005
3.817		0.8755	0.0005	2		0.736	0.074	2		0.8215	0.0295	2		0.846	0.018	2		0.6115	0.0125	2		0.6905	0.0955	2		0.7575	0.0025	2			3.817		0.77	0.028	2		0.6815	0.0015	2		0.78	0.011	2		0.691	0.01	2		0.697
3.833		0.874	0	2		0.7365	0.0755	2		0.8215	0.0295	2		0.843	0.018	2		0.611	0.012	2		0.6865	0.0965	2		0.754	0.002	2			3.833		0.7715	0.0275	2		0.6825	0.0035	2		0.777	0.01	2		0.691	0.012	2		0.699
3.85		0.875	0.002	2		0.7335	0.0755	2		0.8235	0.0275	2		0.8435	0.0165	2		0.609	0.011	2		0.6885	0.0995	2		0.7575	0.0015	2			3.85		0.77	0.027	2		0.683	0.004	2		0.779	0.01	2		0.6905	0.0095	2		0.6955
3.867		0.8745	0.0005	2		0.7355	0.0745	2		0.823	0.031	2		0.844	0.017	2		0.608	0.016	2		0.686	0.099	2		0.7555	0.0025	2			3.867		0.7695	0.0295	2		0.681	0.004	2		0.7765	0.0095	2		0.6905	0.0115	2		0.6975
3.883		0.8735	0.0015	2		0.733	0.076	2		0.8225	0.0265	2		0.8445	0.0175	2		0.6055	0.0135	2		0.685	0.1	2		0.7545	0.0015	2			3.883		0.7685	0.0235	2		0.679	0.003	2		0.778	0.01	2		0.6935	0.0115	2		0.696
3.9		0.8745	0.0025	2		0.73	0.076	2		0.822	0.028	2		0.843	0.018	2		0.6035	0.0125	2		0.685	0.1	2		0.753	0.002	2			3.9		0.7695	0.0265	2		0.679	0.001	2		0.779	0.011	2		0.695	0.009	2		0.695
3.917		0.8735	0.0025	2		0.733	0.076	2		0.8205	0.0275	2		0.844	0.017	2		0.604	0.015	2		0.6825	0.1015	2		0.7535	0.0025	2			3.917		0.768	0.03	2		0.681	0.006	2		0.7805	0.0095	2		0.6875	0.0085	2		0.696
3.933		0.8725	0.0005	2		0.7285	0.0775	2		0.821	0.025	2		0.841	0.018	2		0.6005	0.0125	2		0.6815	0.1035	2		0.7525	0.0035	2			3.933		0.7705	0.0315	2		0.684	0.003	2		0.779	0.01	2		0.684	0.005	2		0.695
3.95		0.872	0.001	2		0.7295	0.0795	2		0.821	0.027	2		0.8415	0.0165	2		0.597	0.014	2		0.68	0.102	2		0.753	0.002	2			3.95		0.7675	0.0245	2		0.68	0	2		0.776	0.011	2		0.6875	0.0075	2		0.6945
3.967		0.873	0.001	2		0.7295	0.0775	2		0.8185	0.0265	2		0.843	0.018	2		0.598	0.015	2		0.6755	0.1005	2		0.752	0.002	2			3.967		0.765	0.027	2		0.681	0.003	2		0.7765	0.0105	2		0.689	0.01	2		0.695
3.983		0.87	0.002	2		0.725	0.077	2		0.817	0.023	2		0.843	0.018	2		0.5945	0.0145	2		0.676	0.104	2		0.7495	0.0025	2			3.983		0.768	0.03	2		0.6795	0.0035	2		0.778	0.01	2		0.687	0.007	2		0.6955
4		0.872	0	2		0.725	0.081	2		0.8195	0.0235	2		0.8395	0.0185	2		0.5915	0.0125	2		0.673	0.104	2		0.749	0.004	2			4		0.767	0.028	2		0.681	0.003	2		0.78	0.01	2		0.6905	0.0125	2		0.696
4.017		0.8715	0.0015	2		0.724	0.079	2		0.818	0.026	2		0.8425	0.0175	2		0.592	0.014	2		0.673	0.106	2		0.749	0.002	2			4.017		0.767	0.03	2		0.6795	0.0025	2		0.7745	0.0095	2		0.692	0.014	2		0.6945
4.033		0.8705	0.0005	2		0.725	0.08	2		0.818	0.026	2		0.8415	0.0185	2		0.5905	0.0145	2		0.671	0.105	2		0.75	0.002	2			4.033		0.7675	0.0285	2		0.679	0.003	2		0.775	0.01	2		0.688	0.012	2		0.6945
4.05		0.8695	0.0005	2		0.7195	0.0835	2		0.8165	0.0245	2		0.8405	0.0175	2		0.583	0.012	2		0.669	0.105	2		0.7475	0.0035	2			4.05		0.767	0.031	2		0.678	0	2		0.7785	0.0105	2		0.683	0.006	2		0.695
4.067		0.8685	0.0015	2		0.7205	0.0825	2		0.8165	0.0245	2		0.838	0.018	2		0.585	0.013	2		0.668	0.107	2		0.747	0.004	2			4.067		0.7695	0.0265	2		0.675	0.004	2		0.7755	0.0095	2		0.6835	0.0075	2		0.6925
4.083		0.8695	0.0035	2		0.7225	0.0815	2		0.8165	0.0255	2		0.8385	0.0175	2		0.586	0.015	2		0.6635	0.1075	2		0.7485	0.0035	2			4.083		0.768	0.028	2		0.68	0.002	2		0.776	0.01	2		0.682	0.008	2		0.696
4.1		0.8705	0.0015	2		0.718	0.082	2		0.819	0.024	2		0.8365	0.0175	2		0.5805	0.0155	2		0.665	0.108	2		0.748	0.004	2			4.1		0.7685	0.0275	2		0.681	0.003	2		0.7745	0.0115	2		0.6875	0.0115	2		0.6915
4.117		0.871	0.002	2		0.72	0.083	2		0.816	0.026	2		0.839	0.017	2		0.58	0.017	2		0.663	0.108	2		0.7485	0.0015	2			4.117		0.7675	0.0295	2		0.6785	0.0015	2		0.7735	0.0105	2		0.691	0.015	2		0.6925
4.133		0.8715	0.0015	2		0.717	0.083	2		0.8155	0.0245	2		0.8385	0.0175	2		0.578	0.016	2		0.6625	0.1085	2		0.7485	0.0035	2			4.133		0.768	0.029	2		0.676	0.001	2		0.7745	0.0105	2		0.6825	0.0075	2		0.6935
4.15		0.8705	0.0025	2		0.719	0.082	2		0.8165	0.0245	2		0.8375	0.0165	2		0.5785	0.0175	2		0.6575	0.1095	2		0.7465	0.0025	2			4.15		0.7645	0.0325	2		0.6805	0.0035	2		0.777	0.012	2		0.6915	0.0165	2		0.691
4.167		0.871	0.004	2		0.718	0.083	2		0.8175	0.0245	2		0.837	0.018	2		0.578	0.016	2		0.6565	0.1075	2		0.7455	0.0025	2			4.167		0.7705	0.0305	2		0.6775	0.0015	2		0.7755	0.0095	2		0.688	0.014	2		0.6915
4.183		0.868	0.003	2		0.719	0.083	2		0.8165	0.0225	2		0.838	0.017	2		0.5765	0.0185	2		0.657	0.11	2		0.7445	0.0045	2			4.183		0.7665	0.0275	2		0.678	0.002	2		0.776	0.008	2		0.682	0.009	2		0.6915
4.2		0.8695	0.0035	2		0.721	0.084	2		0.8165	0.0235	2		0.835	0.017	2		0.576	0.021	2		0.654	0.111	2		0.7435	0.0045	2			4.2		0.7655	0.0275	2		0.677	0.001	2		0.7755	0.0105	2		0.684	0.009	2		0.691
4.217		0.87	0.003	2		0.715	0.086	2		0.814	0.023	2		0.835	0.018	2		0.571	0.017	2		0.6525	0.1105	2		0.743	0.003	2			4.217		0.7665	0.0255	2		0.674	0.003	2		0.778	0.01	2		0.682	0.008	2		0.692
4.233		0.868	0.004	2		0.7145	0.0865	2		0.814	0.023	2		0.8355	0.0175	2		0.5685	0.0185	2		0.651	0.112	2		0.7425	0.0025	2			4.233		0.7675	0.0285	2		0.674	0.004	2		0.775	0.01	2		0.6895	0.0145	2		0.691
4.25		0.866	0	2		0.71	0.087	2		0.814	0.023	2		0.8355	0.0175	2		0.565	0.016	2		0.6495	0.1125	2		0.7425	0.0025	2			4.25		0.769	0.03	2		0.678	0.003	2		0.777	0.01	2		0.6855	0.0135	2		0.692
4.267		0.869	0.002	2		0.7085	0.0885	2		0.8125	0.0205	2		0.8345	0.0165	2		0.5625	0.0155	2		0.649	0.113	2		0.7425	0.0035	2			4.267		0.764	0.028	2		0.676	0.001	2		0.7795	0.0105	2		0.684	0.014	2		0.6935
4.283		0.8675	0.0005	2		0.712	0.088	2		0.8135	0.0185	2		0.834	0.017	2		0.5645	0.0175	2		0.646	0.114	2		0.742	0.002	2			4.283		0.765	0.028	2		0.6755	0.0005	2		0.7755	0.0105	2		0.685	0.014	2		0.6905
4.3		0.866	0	2		0.7075	0.0915	2		0.8135	0.0215	2		0.833	0.019	2		0.5595	0.0135	2		0.6445	0.1135	2		0.7405	0.0035	2			4.3		0.7665	0.0305	2		0.6775	0.0015	2		0.7745	0.0105	2		0.6855	0.0155	2		0.6915
4.317		0.864	0.001	2		0.712	0.088	2		0.8115	0.0215	2		0.8325	0.0175	2		0.563	0.019	2		0.644	0.114	2		0.7395	0.0055	2			4.317		0.767	0.03	2		0.678	0.002	2		0.7755	0.0105	2		0.6805	0.0095	2		0.6905
4.333		0.8665	0.0005	2		0.7065	0.0895	2		0.812	0.021	2		0.8335	0.0185	2		0.5585	0.0165	2		0.6435	0.1155	2		0.74	0.005	2			4.333		0.768	0.03	2		0.678	0.004	2		0.776	0.01	2		0.686	0.014	2		0.6915
4.35		0.868	0.001	2		0.708	0.089	2		0.813	0.021	2		0.831	0.017	2		0.559	0.018	2		0.6415	0.1155	2		0.7395	0.0045	2			4.35		0.7655	0.0285	2		0.6745	0.0025	2		0.777	0.01	2		0.68	0.009	2		0.6895
4.367		0.866	0.001	2		0.706	0.092	2		0.8125	0.0205	2		0.8315	0.0175	2		0.5535	0.0175	2		0.639	0.118	2		0.739	0.005	2			4.367		0.7655	0.0285	2		0.6785	0.0005	2		0.7785	0.0095	2		0.6815	0.0105	2		0.692
4.383		0.866	0.001	2		0.7065	0.0915	2		0.814	0.02	2		0.8285	0.0185	2		0.5535	0.0185	2		0.6385	0.1175	2		0.736	0.006	2			4.383		0.7665	0.0295	2		0.678	0.005	2		0.777	0.011	2		0.6795	0.0075	2		0.6905
4.4		0.8665	0.0005	2		0.7045	0.0935	2		0.811	0.02	2		0.83	0.017	2		0.5505	0.0175	2		0.637	0.117	2		0.738	0.004	2			4.4		0.768	0.029	2		0.679	0.003	2		0.778	0.011	2		0.678	0.01	2		0.6915
4.417		0.8675	0.0015	2		0.706	0.091	2		0.811	0.021	2		0.83	0.018	2		0.5505	0.0215	2		0.6355	0.1175	2		0.7365	0.0055	2			4.417		0.7675	0.0295	2		0.673	0.001	2		0.775	0.011	2		0.6845	0.0125	2		0.692
4.433		0.8675	0.0025	2		0.7045	0.0915	2		0.812	0.02	2		0.83	0.018	2		0.5495	0.0205	2		0.631	0.121	2		0.7365	0.0055	2			4.433		0.765	0.027	2		0.675	0.006	2		0.778	0.01	2		0.685	0.013	2		0.6865
4.45		0.866	0	2		0.7055	0.0915	2		0.8105	0.0195	2		0.829	0.017	2		0.5505	0.0205	2		0.632	0.121	2		0.7345	0.0035	2			4.45		0.7655	0.0285	2		0.6755	0.0015	2		0.779	0.01	2		0.6835	0.0115	2		0.6885
4.467		0.8635	0.0025	2		0.7035	0.0925	2		0.808	0.019	2		0.829	0.018	2		0.547	0.02	2		0.6295	0.1195	2		0.7375	0.0045	2			4.467		0.765	0.03	2		0.6765	0.0025	2		0.778	0.008	2		0.6865	0.0165	2		0.6905
4.483		0.8635	0.0005	2		0.706	0.09	2		0.8105	0.0205	2		0.8275	0.0175	2		0.5485	0.0255	2		0.626	0.119	2		0.733	0.007	2			4.483		0.764	0.031	2		0.6765	0.0015	2		0.777	0.012	2		0.68	0.013	2		0.6905
4.5		0.865	0.001	2		0.7025	0.0925	2		0.8075	0.0205	2		0.8295	0.0185	2		0.5445	0.0215	2		0.625	0.12	2		0.7335	0.0055	2			4.5		0.765	0.029	2		0.676	0.002	2		0.7745	0.0105	2		0.675	0.008	2		0.691
4.517		0.8655	0.0005	2		0.7045	0.0925	2		0.807	0.018	2		0.8295	0.0185	2		0.546	0.023	2		0.6245	0.1215	2		0.7315	0.0045	2			4.517		0.7645	0.0285	2		0.6715	0.0005	2		0.771	0.01	2		0.684	0.016	2		0.6885
4.533		0.865	0.004	2		0.696	0.094	2		0.8085	0.0195	2		0.8285	0.0175	2		0.539	0.019	2		0.6235	0.1215	2		0.734	0.005	2			4.533		0.7665	0.0275	2		0.676	0.002	2		0.7755	0.0105	2		0.681	0.013	2		0.688
4.55		0.864	0.004	2		0.7005	0.0945	2		0.807	0.015	2		0.8275	0.0175	2		0.5385	0.0235	2		0.622	0.122	2		0.733	0.005	2			4.55		0.763	0.027	2		0.6725	0.0035	2		0.777	0.01	2		0.6825	0.0135	2		0.6895
4.567		0.864	0.004	2		0.699	0.096	2		0.8075	0.0165	2		0.8285	0.0165	2		0.5365	0.0215	2		0.6165	0.1205	2		0.733	0.006	2			4.567		0.7615	0.0275	2		0.6755	0.0035	2		0.7785	0.0105	2		0.682	0.015	2		0.687
4.583		0.86	0.003	2		0.701	0.093	2		0.806	0.018	2		0.828	0.016	2		0.5395	0.0245	2		0.618	0.124	2		0.7325	0.0055	2			4.583		0.765	0.029	2		0.677	0.005	2		0.78	0.01	2		0.6765	0.0095	2		0.6875
4.6		0.8635	0.0015	2		0.697	0.096	2		0.8075	0.0175	2		0.825	0.017	2		0.5345	0.0225	2		0.6145	0.1235	2		0.732	0.007	2			4.6		0.763	0.028	2		0.676	0.004	2		0.7805	0.0105	2		0.6875	0.0195	2		0.6865
4.617		0.8635	0.0025	2		0.7005	0.0945	2		0.8085	0.0165	2		0.824	0.017	2		0.5365	0.0255	2		0.615	0.123	2		0.732	0.008	2			4.617		0.7645	0.0285	2		0.6775	0.0015	2		0.7755	0.0105	2		0.672	0.006	2		0.6875
4.633		0.8635	0.0005	2		0.697	0.096	2		0.807	0.016	2		0.8275	0.0175	2		0.5325	0.0245	2		0.6115	0.1225	2		0.7325	0.0075	2			4.633		0.7635	0.0285	2		0.678	0	2		0.777	0.01	2		0.679	0.011	2		0.6835
4.65		0.8615	0.0015	2		0.6965	0.0955	2		0.8045	0.0185	2		0.825	0.017	2		0.532	0.025	2		0.61	0.123	2		0.7295	0.0055	2			4.65		0.7635	0.0295	2		0.673	0.001	2		0.774	0.01	2		0.6795	0.0125	2		0.6855
4.667		0.8635	0.0015	2		0.697	0.097	2		0.8035	0.0175	2		0.8255	0.0165	2		0.5305	0.0255	2		0.6085	0.1265	2		0.7295	0.0045	2			4.667		0.7625	0.0295	2		0.6695	0.0005	2		0.7735	0.0105	2		0.679	0.01	2		0.683
4.683		0.8635	0.0025	2		0.698	0.096	2		0.805	0.016	2		0.825	0.018	2		0.53	0.028	2		0.605	0.124	2		0.7285	0.0065	2			4.683		0.761	0.031	2		0.6755	0.0015	2		0.773	0.01	2		0.6775	0.0125	2		0.685
4.7		0.863	0	2		0.694	0.097	2		0.807	0.018	2		0.826	0.017	2		0.527	0.026	2		0.6045	0.1235	2		0.726	0.007	2			4.7		0.763	0.031	2		0.673	0.001	2		0.7735	0.0105	2		0.6785	0.0125	2		0.6815
4.717		0.863	0.001	2		0.695	0.096	2		0.806	0.017	2		0.823	0.017	2		0.5275	0.0275	2		0.601	0.122	2		0.7265	0.0075	2			4.717		0.763	0.03	2		0.6775	0.0025	2		0.7735	0.0105	2		0.673	0.01	2		0.6835
4.733		0.86	0.002	2		0.695	0.095	2		0.8035	0.0185	2		0.823	0.016	2		0.527	0.029	2		0.5995	0.1255	2		0.7275	0.0075	2			4.733		0.7585	0.0275	2		0.6745	0.0015	2		0.7735	0.0105	2		0.679	0.014	2		0.684
4.75		0.8645	0.0025	2		0.695	0.095	2		0.804	0.016	2		0.8215	0.0165	2		0.5265	0.0295	2		0.6	0.124	2		0.7265	0.0055	2			4.75		0.761	0.03	2		0.673	0.002	2		0.7735	0.0105	2		0.6755	0.0105	2		0.685
4.767		0.862	0.003	2		0.694	0.096	2		0.804	0.015	2		0.824	0.018	2		0.524	0.029	2		0.597	0.126	2		0.7265	0.0075	2			4.767		0.759	0.027	2		0.672	0.002	2		0.7685	0.0105	2		0.6805	0.0135	2		0.6825
4.783		0.8645	0.0025	2		0.692	0.096	2		0.803	0.014	2		0.8235	0.0175	2		0.522	0.03	2		0.5955	0.1255	2		0.7255	0.0065	2			4.783		0.759	0.03	2		0.671	0.002	2		0.7695	0.0105	2		0.6735	0.0095	2		0.6855
4.8		0.8635	0.0045	2		0.6915	0.0945	2		0.802	0.017	2		0.8215	0.0175	2		0.5205	0.0315	2		0.5925	0.1245	2		0.727	0.006	2			4.8		0.76	0.025	2		0.677	0.003	2		0.7705	0.0105	2		0.675	0.012	2		0.6825
4.817		0.8605	0.0035	2		0.691	0.098	2		0.803	0.014	2		0.8235	0.0165	2		0.5185	0.0295	2		0.5925	0.1255	2		0.725	0.006	2			4.817		0.763	0.028	2		0.67	0.001	2		0.7715	0.0105	2		0.6755	0.0105	2		0.6815
4.833		0.862	0.003	2		0.6915	0.0955	2		0.8025	0.0145	2		0.821	0.018	2		0.52	0.032	2		0.5905	0.1255	2		0.724	0.006	2			4.833		0.761	0.028	2		0.6735	0.0025	2		0.7745	0.0125	2		0.6795	0.0175	2		0.6835
4.85		0.8615	0.0035	2		0.6905	0.0955	2		0.803	0.016	2		0.82	0.016	2		0.5175	0.0325	2		0.589	0.126	2		0.7245	0.0065	2			4.85		0.7585	0.0305	2		0.672	0.004	2		0.769	0.011	2		0.6755	0.0105	2		0.683
4.867		0.8605	0.0045	2		0.6915	0.0955	2		0.803	0.015	2		0.8145	0.0185	2		0.518	0.033	2		0.587	0.128	2		0.724	0.006	2			4.867		0.76	0.032	2		0.671	0.006	2		0.7725	0.0105	2		0.679	0.014	2		0.68
4.883		0.86	0.005	2		0.6895	0.0955	2		0.8025	0.0145	2		0.818	0.017	2		0.5155	0.0335	2		0.583	0.125	2		0.723	0.006	2			4.883		0.7615	0.0275	2		0.671	0.003	2		0.7705	0.0105	2		0.6785	0.0115	2		0.6795
4.9		0.8585	0.0065	2		0.6875	0.0985	2		0.802	0.015	2		0.8205	0.0165	2		0.5115	0.0315	2		0.5845	0.1265	2		0.7235	0.0065	2			4.9		0.7615	0.0285	2		0.6725	0.0035	2		0.773	0.012	2		0.673	0.012	2		0.682
4.917		0.857	0.004	2		0.689	0.098	2		0.802	0.014	2		0.819	0.017	2		0.5125	0.0335	2		0.583	0.127	2		0.723	0.005	2			4.917		0.758	0.03	2		0.67	0.002	2		0.774	0.01	2		0.6715	0.0095	2		0.6805
4.933		0.858	0.002	2		0.6895	0.0955	2		0.7985	0.0145	2		0.819	0.015	2		0.513	0.036	2		0.577	0.125	2		0.723	0.008	2			4.933		0.759	0.032	2		0.675	0.002	2		0.7755	0.0105	2		0.6775	0.0165	2		0.6785
4.95		0.859	0.004	2		0.6855	0.0975	2		0.8005	0.0135	2		0.8185	0.0165	2		0.509	0.034	2		0.5775	0.1265	2		0.7205	0.0075	2			4.95		0.76	0.027	2		0.671	0.004	2		0.7715	0.0105	2		0.673	0.011	2		0.6805
4.967		0.859	0.003	2		0.689	0.097	2		0.8	0.012	2		0.8185	0.0175	2		0.51	0.037	2		0.574	0.129	2		0.721	0.01	2			4.967		0.757	0.029	2		0.668	0	2		0.7735	0.0105	2		0.678	0.015	2		0.681
4.983		0.8575	0.0025	2		0.685	0.097	2		0.7995	0.0135	2		0.818	0.016	2		0.5065	0.0355	2		0.574	0.127	2		0.719	0.007	2			4.983		0.759	0.031	2		0.6675	0.0005	2		0.7715	0.0115	2		0.6775	0.0155	2		0.681
5		0.859	0.003	2		0.684	0.098	2		0.7995	0.0145	2		0.8155	0.0175	2		0.504	0.036	2		0.571	0.126	2		0.72	0.01	2			5		0.76	0.027	2		0.669	0.001	2		0.7725	0.0115	2		0.678	0.016	2		0.679
5.017		0.859	0.003	2		0.6835	0.0965	2		0.7995	0.0125	2		0.818	0.017	2		0.505	0.036	2		0.5685	0.1245	2		0.72	0.008	2			5.017		0.759	0.03	2		0.6705	0.0025	2		0.77	0.008	2		0.6735	0.0145	2		0.6785
5.033		0.8575	0.0055	2		0.6835	0.0975	2		0.796	0.014	2		0.8175	0.0175	2		0.502	0.038	2		0.566	0.128	2		0.716	0.007	2			5.033		0.7585	0.0295	2		0.671	0.001	2		0.774	0.011	2		0.6735	0.0125	2		0.68
5.05		0.8575	0.0055	2		0.686	0.098	2		0.7965	0.0135	2		0.813	0.017	2		0.5025	0.0395	2		0.5655	0.1255	2		0.7175	0.0065	2			5.05		0.7585	0.0305	2		0.6705	0.0025	2		0.768	0.011	2		0.67	0.005	2		0.684
5.067		0.8595	0.0045	2		0.6835	0.0985	2		0.796	0.013	2		0.8155	0.0165	2		0.5005	0.0385	2		0.5645	0.1275	2		0.717	0.009	2			5.067		0.762	0.029	2		0.6675	0.0035	2		0.767	0.01	2		0.6735	0.0125	2		0.6825
5.083		0.8585	0.0035	2		0.6805	0.0995	2		0.795	0.014	2		0.8145	0.0175	2		0.498	0.037	2		0.5605	0.1265	2		0.7175	0.0075	2			5.083		0.7595	0.0285	2		0.672	0.002	2		0.7695	0.0105	2		0.676	0.014	2		0.6785
5.1		0.8585	0.0035	2		0.6825	0.0985	2		0.7965	0.0125	2		0.815	0.018	2		0.498	0.04	2		0.559	0.127	2		0.716	0.006	2			5.1		0.759	0.029	2		0.6685	0.0005	2		0.7695	0.0105	2		0.673	0.012	2		0.6795
5.117		0.858	0.004	2		0.685	0.097	2		0.7975	0.0135	2		0.8125	0.0165	2		0.5	0.042	2		0.559	0.128	2		0.7175	0.0075	2			5.117		0.759	0.03	2		0.672	0	2		0.7695	0.0105	2		0.6755	0.0155	2		0.6825
5.133		0.856	0.004	2		0.681	0.098	2		0.796	0.015	2		0.8115	0.0175	2		0.4965	0.0405	2		0.5555	0.1255	2		0.714	0.008	2			5.133		0.758	0.032	2		0.6715	0.0025	2		0.77	0.011	2		0.673	0.013	2		0.681
5.15		0.8575	0.0045	2		0.679	0.099	2		0.794	0.014	2		0.814	0.016	2		0.493	0.04	2		0.553	0.125	2		0.7135	0.0075	2			5.15		0.757	0.029	2		0.671	0.002	2		0.7695	0.0105	2		0.6705	0.0115	2		0.68
5.167		0.859	0.004	2		0.68	0.099	2		0.795	0.014	2		0.8135	0.0165	2		0.4925	0.0415	2		0.5515	0.1285	2		0.715	0.007	2			5.167		0.756	0.031	2		0.6685	0.0015	2		0.765	0.011	2		0.6765	0.0195	2		0.682
5.183		0.8585	0.0045	2		0.6775	0.1005	2		0.795	0.012	2		0.813	0.017	2		0.491	0.039	2		0.55	0.127	2		0.7145	0.0085	2			5.183		0.757	0.031	2		0.67	0.002	2		0.7715	0.0105	2		0.672	0.011	2		0.679
5.2		0.8565	0.0045	2		0.68	0.102	2		0.791	0.012	2		0.813	0.016	2		0.489	0.042	2		0.548	0.127	2		0.718	0.008	2			5.2		0.757	0.026	2		0.668	0	2		0.7695	0.0105	2		0.6725	0.0145	2		0.68
5.217		0.857	0.005	2		0.677	0.102	2		0.7945	0.0125	2		0.813	0.017	2		0.488	0.04	2		0.5455	0.1265	2		0.714	0.008	2			5.217		0.754	0.028	2		0.671	0.004	2		0.7705	0.0105	2		0.671	0.014	2		0.68
5.233		0.8565	0.0035	2		0.676	0.102	2		0.792	0.014	2		0.812	0.016	2		0.486	0.041	2		0.5425	0.1255	2		0.7115	0.0095	2			5.233		0.758	0.028	2		0.673	0.002	2		0.7715	0.0105	2		0.6695	0.0115	2		0.6785
5.25		0.8555	0.0035	2		0.679	0.102	2		0.792	0.012	2		0.8135	0.0175	2		0.4875	0.0425	2		0.5395	0.1265	2		0.712	0.007	2			5.25		0.7595	0.0285	2		0.6705	0.0035	2		0.7725	0.0105	2		0.6705	0.0135	2		0.677
5.267		0.8575	0.0045	2		0.676	0.103	2		0.791	0.012	2		0.8105	0.0165	2		0.485	0.041	2		0.5385	0.1275	2		0.7105	0.0095	2			5.267		0.757	0.032	2		0.6685	0.0015	2		0.7715	0.0105	2		0.6745	0.0175	2		0.678
5.283		0.856	0.003	2		0.6765	0.1015	2		0.791	0.015	2		0.8095	0.0165	2		0.4845	0.0435	2		0.5375	0.1265	2		0.7105	0.0085	2			5.283		0.761	0.032	2		0.669	0.001	2		0.7715	0.0105	2		0.674	0.018	2		0.6795
5.3		0.856	0.004	2		0.6715	0.1045	2		0.7915	0.0115	2		0.8085	0.0175	2		0.4795	0.0395	2		0.5355	0.1255	2		0.7105	0.0075	2			5.3		0.757	0.032	2		0.667	0.004	2		0.7685	0.0105	2		0.6685	0.0115	2		0.676
5.317		0.8545	0.0055	2		0.6705	0.1025	2		0.791	0.014	2		0.811	0.017	2		0.477	0.043	2		0.534	0.125	2		0.71	0.008	2			5.317		0.7575	0.0325	2		0.6705	0.0005	2		0.768	0.011	2		0.6725	0.0155	2		0.676
5.333		0.856	0.004	2		0.675	0.102	2		0.79	0.012	2		0.8095	0.0175	2		0.48	0.045	2		0.5305	0.1255	2		0.709	0.008	2			5.333		0.7575	0.0265	2		0.6685	0.0005	2		0.768	0.011	2		0.671	0.015	2		0.6765
5.35		0.8555	0.0035	2		0.676	0.101	2		0.7875	0.0105	2		0.8095	0.0165	2		0.4815	0.0465	2		0.532	0.126	2		0.708	0.009	2			5.35		0.756	0.03	2		0.6695	0.0005	2		0.767	0.01	2		0.672	0.015	2		0.677
5.367		0.8565	0.0025	2		0.675	0.103	2		0.789	0.012	2		0.811	0.016	2		0.479	0.046	2		0.5295	0.1245	2		0.709	0.009	2			5.367		0.757	0.032	2		0.6675	0.0025	2		0.7675	0.0105	2		0.6735	0.0175	2		0.6745
5.383		0.856	0.004	2		0.672	0.101	2		0.7885	0.0125	2		0.809	0.016	2		0.4775	0.0455	2		0.5275	0.1245	2		0.7085	0.0115	2			5.383		0.757	0.033	2		0.669	0.001	2		0.765	0.011	2		0.67	0.016	2		0.6755
5.4		0.858	0.004	2		0.6715	0.1035	2		0.79	0.012	2		0.8085	0.0165	2		0.475	0.045	2		0.524	0.127	2		0.709	0.01	2			5.4		0.755	0.03	2		0.669	0.001	2		0.7685	0.0105	2		0.673	0.019	2		0.678
5.417		0.856	0.002	2		0.6715	0.1015	2		0.788	0.012	2		0.8075	0.0165	2		0.476	0.047	2		0.5205	0.1235	2		0.7085	0.0105	2			5.417		0.755	0.031	2		0.668	0.004	2		0.767	0.01	2		0.668	0.014	2		0.676
5.433		0.856	0.004	2		0.672	0.104	2		0.787	0.013	2		0.8065	0.0165	2		0.474	0.046	2		0.519	0.124	2		0.7065	0.0075	2			5.433		0.757	0.032	2		0.669	0.003	2		0.768	0.011	2		0.672	0.016	2		0.6735
5.45		0.8555	0.0025	2		0.67	0.104	2		0.788	0.013	2		0.8065	0.0165	2		0.4725	0.0455	2		0.5175	0.1245	2		0.706	0.007	2			5.45		0.7545	0.0335	2		0.665	0.001	2		0.769	0.011	2		0.673	0.018	2		0.6745
5.467		0.855	0.003	2		0.672	0.103	2		0.7855	0.0125	2		0.806	0.016	2		0.472	0.049	2		0.5155	0.1225	2		0.706	0.009	2			5.467		0.757	0.031	2		0.6685	0.0045	2		0.767	0.01	2		0.6685	0.0165	2		0.676
5.483		0.8565	0.0015	2		0.671	0.102	2		0.787	0.012	2		0.805	0.018	2		0.4715	0.0495	2		0.512	0.124	2		0.7055	0.0095	2			5.483		0.7565	0.0305	2		0.6655	0.0005	2		0.7685	0.0085	2		0.6745	0.0215	2		0.673
5.5		0.854	0.005	2		0.6705	0.1055	2		0.7865	0.0105	2		0.8065	0.0175	2		0.468	0.049	2		0.5115	0.1235	2		0.7045	0.0105	2			5.5		0.756	0.031	2		0.6665	0.0035	2		0.766	0.011	2		0.666	0.014	2		0.6725
5.517		0.8545	0.0025	2		0.67	0.105	2		0.787	0.011	2		0.8085	0.0155	2		0.4685	0.0485	2		0.5085	0.1235	2		0.706	0.008	2			5.517		0.7525	0.0325	2		0.669	0.001	2		0.7645	0.0105	2		0.6705	0.0165	2		0.675
5.533		0.854	0.005	2		0.667	0.106	2		0.7865	0.0105	2		0.8075	0.0155	2		0.465	0.048	2		0.5045	0.1215	2		0.701	0.007	2			5.533		0.752	0.03	2		0.6675	0.0015	2		0.766	0.01	2		0.671	0.018	2		0.673
5.55		0.854	0.004	2		0.6695	0.1055	2		0.7855	0.0115	2		0.8055	0.0165	2		0.466	0.049	2		0.5055	0.1235	2		0.7025	0.0075	2			5.55		0.753	0.03	2		0.6695	0.0005	2		0.767	0.01	2		0.668	0.014	2		0.6725
5.567		0.85	0.001	2		0.6675	0.1055	2		0.7835	0.0115	2		0.806	0.016	2		0.464	0.049	2		0.503	0.121	2		0.703	0.008	2			5.567		0.754	0.03	2		0.6675	0.0005	2		0.772	0.011	2		0.6685	0.0165	2		0.6705
5.583		0.8515	0.0045	2		0.67	0.104	2		0.787	0.012	2		0.8035	0.0175	2		0.466	0.051	2		0.5015	0.1225	2		0.703	0.01	2			5.583		0.7565	0.0315	2		0.6675	0.0015	2		0.7665	0.0105	2		0.67	0.018	2		0.674
5.6		0.851	0.003	2		0.669	0.104	2		0.7815	0.0115	2		0.8045	0.0165	2		0.4645	0.0525	2		0.4995	0.1225	2		0.7025	0.0085	2			5.6		0.7555	0.0325	2		0.6665	0.0005	2		0.764	0.01	2		0.668	0.016	2		0.673
5.617		0.854	0.003	2		0.6655	0.1065	2		0.783	0.011	2		0.803	0.016	2		0.46	0.05	2		0.4975	0.1235	2		0.699	0.011	2			5.617		0.7545	0.0335	2		0.6675	0.0015	2		0.766	0.011	2		0.6695	0.0175	2		0.6725
5.633		0.8525	0.0035	2		0.667	0.107	2		0.7835	0.0115	2		0.801	0.018	2		0.461	0.051	2		0.496	0.122	2		0.6985	0.0075	2			5.633		0.753	0.033	2		0.6645	0.0025	2		0.765	0.011	2		0.6695	0.0155	2		0.669
5.65		0.852	0.003	2		0.6645	0.1075	2		0.783	0.013	2		0.803	0.017	2		0.4575	0.0505	2		0.4945	0.1215	2		0.701	0.009	2			5.65		0.756	0.033	2		0.6655	0.0015	2		0.7665	0.0105	2		0.667	0.014	2		0.6705
5.667		0.8525	0.0045	2		0.664	0.108	2		0.7805	0.0125	2		0.804	0.016	2		0.4565	0.0505	2		0.4915	0.1205	2		0.701	0.008	2			5.667		0.755	0.033	2		0.665	0	2		0.7675	0.0105	2		0.667	0.016	2		0.6735
5.683		0.853	0.003	2		0.662	0.107	2		0.78	0.012	2		0.8035	0.0155	2		0.4535	0.0515	2		0.4885	0.1205	2		0.6985	0.0095	2			5.683		0.7525	0.0305	2		0.6645	0.0005	2		0.7685	0.0105	2		0.6625	0.0125	2		0.6715
5.7		0.852	0.003	2		0.6635	0.1095	2		0.782	0.013	2		0.805	0.016	2		0.454	0.051	2		0.4855	0.1195	2		0.698	0.01	2			5.7		0.7545	0.0335	2		0.6645	0.0015	2		0.766	0.011	2		0.6695	0.0195	2		0.6725
5.717		0.8515	0.0045	2		0.6585	0.1085	2		0.78	0.012	2		0.802	0.016	2		0.4505	0.0495	2		0.4835	0.1195	2		0.6995	0.0085	2			5.717		0.754	0.033	2		0.661	0.003	2		0.765	0.011	2		0.6695	0.0185	2		0.6715
5.733		0.853	0.004	2		0.663	0.111	2		0.7795	0.0125	2		0.799	0.017	2		0.451	0.051	2		0.4825	0.1195	2		0.698	0.009	2			5.733		0.751	0.031	2		0.668	0.002	2		0.7655	0.0105	2		0.6705	0.0195	2		0.672
5.75		0.8535	0.0045	2		0.6555	0.1085	2		0.7775	0.0105	2		0.799	0.017	2		0.4475	0.0495	2		0.4785	0.1175	2		0.6975	0.0085	2			5.75		0.7515	0.0345	2		0.663	0.002	2		0.764	0.011	2		0.6645	0.0145	2		0.672
5.767		0.8535	0.0045	2		0.659	0.111	2		0.779	0.011	2		0.7985	0.0165	2		0.4475	0.0505	2		0.478	0.119	2		0.6965	0.0095	2			5.767		0.7515	0.0315	2		0.668	0.001	2		0.766	0.011	2		0.667	0.019	2		0.674
5.783		0.8515	0.0055	2		0.657	0.111	2		0.7805	0.0115	2		0.8005	0.0165	2		0.4455	0.0505	2		0.476	0.117	2		0.697	0.011	2			5.783		0.752	0.03	2		0.663	0.002	2		0.7615	0.0115	2		0.6675	0.0195	2		0.6725
5.8		0.8515	0.0045	2		0.657	0.111	2		0.779	0.011	2		0.797	0.017	2		0.444	0.051	2		0.473	0.119	2		0.697	0.01	2			5.8		0.753	0.031	2		0.6635	0.0015	2		0.7685	0.0105	2		0.665	0.016	2		0.671
5.817		0.8525	0.0055	2		0.6525	0.1125	2		0.779	0.01	2		0.7975	0.0165	2		0.441	0.048	2		0.4705	0.1175	2		0.693	0.008	2			5.817		0.752	0.031	2		0.664	0.001	2		0.76	0.011	2		0.6655	0.0165	2		0.6735
5.833		0.85	0.006	2		0.658	0.111	2		0.7795	0.0115	2		0.797	0.016	2		0.443	0.054	2		0.4695	0.1165	2		0.6915	0.0105	2			5.833		0.7505	0.0335	2		0.664	0.001	2		0.7635	0.0135	2		0.6715	0.0215	2		0.6745
5.85		0.8495	0.0055	2		0.6575	0.1125	2		0.7765	0.0105	2		0.799	0.015	2		0.442	0.053	2		0.4685	0.1185	2		0.694	0.01	2			5.85		0.7535	0.0315	2		0.664	0	2		0.765	0.01	2		0.666	0.019	2		0.673
5.867		0.8495	0.0045	2		0.655	0.11	2		0.7785	0.0115	2		0.7965	0.0165	2		0.4415	0.0525	2		0.4665	0.1165	2		0.6935	0.0115	2			5.867		0.7525	0.0335	2		0.6635	0.0005	2		0.766	0.01	2		0.6625	0.0145	2		0.672
5.883		0.8505	0.0055	2		0.654	0.111	2		0.777	0.011	2		0.7995	0.0155	2		0.4395	0.0535	2		0.463	0.118	2		0.692	0.009	2			5.883		0.7515	0.0355	2		0.6615	0.0025	2		0.7675	0.0095	2		0.669	0.021	2		0.6725
5.9		0.85	0.005	2		0.655	0.113	2		0.7775	0.0095	2		0.798	0.016	2		0.438	0.053	2		0.463	0.116	2		0.6925	0.0095	2			5.9		0.753	0.033	2		0.666	0.003	2		0.766	0.011	2		0.6665	0.0195	2		0.674
5.917		0.848	0.002	2		0.651	0.113	2		0.7775	0.0105	2		0.797	0.016	2		0.436	0.051	2		0.4595	0.1165	2		0.694	0.01	2			5.917		0.7535	0.0325	2		0.663	0.003	2		0.765	0.011	2		0.662	0.017	2		0.672
5.933		0.8475	0.0045	2		0.655	0.111	2		0.7775	0.0115	2		0.796	0.015	2		0.438	0.056	2		0.4585	0.1155	2		0.692	0.009	2			5.933		0.751	0.033	2		0.663	0	2		0.7655	0.0105	2		0.665	0.016	2		0.6715
5.95		0.8495	0.0035	2		0.654	0.113	2		0.7745	0.0095	2		0.796	0.017	2		0.435	0.055	2		0.4555	0.1135	2		0.692	0.01	2			5.95		0.751	0.034	2		0.662	0	2		0.764	0.011	2		0.661	0.012	2		0.6705
5.967		0.85	0.005	2		0.6545	0.1115	2		0.7735	0.0115	2		0.797	0.016	2		0.436	0.056	2		0.455	0.115	2		0.6925	0.0105	2			5.967		0.7515	0.0345	2		0.663	0.002	2		0.767	0.011	2		0.6645	0.0175	2		0.6705
5.983		0.85	0.005	2		0.651	0.112	2		0.773	0.013	2		0.7945	0.0165	2		0.433	0.055	2		0.4525	0.1145	2		0.693	0.01	2			5.983		0.7505	0.0325	2		0.661	0	2		0.761	0.011	2		0.662	0.017	2		0.67
6		0.848	0.005	2		0.6495	0.1135	2		0.7735	0.0125	2		0.797	0.015	2		0.4305	0.0535	2		0.4525	0.1115	2		0.6885	0.0095	2			6		0.7515	0.0315	2		0.6615	0.0015	2		0.763	0.011	2		0.6635	0.0165	2		0.671
6.017		0.849	0.005	2		0.649	0.112	2		0.7745	0.0135	2		0.7945	0.0155	2		0.4315	0.0545	2		0.449	0.112	2		0.6905	0.0105	2			6.017		0.752	0.033	2		0.663	0.002	2		0.765	0.011	2		0.662	0.015	2		0.6695
6.033		0.848	0.006	2		0.6505	0.1145	2		0.7725	0.0135	2		0.7965	0.0155	2		0.4305	0.0545	2		0.448	0.113	2		0.689	0.009	2			6.033		0.7535	0.0345	2		0.665	0.007	2		0.762	0.007	2		0.6655	0.0185	2		0.6705
6.05		0.8485	0.0055	2		0.6485	0.1135	2		0.773	0.014	2		0.7945	0.0155	2		0.4285	0.0555	2		0.444	0.112	2		0.6875	0.0095	2			6.05		0.7495	0.0335	2		0.6595	0.0025	2		0.7605	0.0115	2		0.664	0.018	2		0.6685
6.067		0.847	0.006	2		0.6505	0.1125	2		0.771	0.012	2		0.7955	0.0165	2		0.43	0.056	2		0.4425	0.1115	2		0.688	0.01	2			6.067		0.75	0.03	2		0.6655	0.0035	2		0.759	0.01	2		0.663	0.017	2		0.6685
6.083		0.8485	0.0055	2		0.6475	0.1125	2		0.7725	0.0125	2		0.7925	0.0155	2		0.4275	0.0565	2		0.441	0.111	2		0.6895	0.0095	2			6.083		0.7505	0.0315	2		0.6585	0.0015	2		0.7595	0.0105	2		0.6635	0.0205	2		0.6695
6.1		0.848	0.007	2		0.649	0.112	2		0.77	0.013	2		0.7925	0.0155	2		0.4265	0.0585	2		0.4385	0.1115	2		0.686	0.009	2			6.1		0.749	0.029	2		0.6595	0.0005	2		0.7605	0.0105	2		0.6615	0.0165	2		0.6675
6.117		0.8465	0.0065	2		0.646	0.112	2		0.768	0.012	2		0.791	0.016	2		0.4255	0.0565	2		0.437	0.11	2		0.687	0.01	2			6.117		0.752	0.03	2		0.662	0.005	2		0.763	0.013	2		0.6615	0.0185	2		0.666
6.133		0.8455	0.0065	2		0.646	0.113	2		0.771	0.012	2		0.793	0.016	2		0.424	0.057	2		0.433	0.109	2		0.6875	0.0095	2			6.133		0.75	0.033	2		0.665	0.003	2		0.7655	0.0095	2		0.6635	0.0195	2		0.668
6.15		0.8465	0.0075	2		0.6465	0.1115	2		0.7685	0.0135	2		0.79	0.016	2		0.424	0.059	2		0.4335	0.1105	2		0.6875	0.0105	2			6.15		0.748	0.031	2		0.6615	0.0005	2		0.763	0.011	2		0.6635	0.0175	2		0.6675
6.167		0.843	0.008	2		0.647	0.112	2		0.7695	0.0115	2		0.7935	0.0145	2		0.424	0.059	2		0.4305	0.1075	2		0.685	0.011	2			6.167		0.748	0.031	2		0.664	0.004	2		0.761	0.011	2		0.66	0.016	2		0.6655
6.183		0.845	0.007	2		0.647	0.113	2		0.7675	0.0105	2		0.792	0.016	2		0.423	0.059	2		0.43	0.109	2		0.6855	0.0095	2			6.183		0.747	0.032	2		0.6615	0.0035	2		0.7615	0.0115	2		0.662	0.019	2		0.665
6.2		0.8475	0.0065	2		0.646	0.114	2		0.7695	0.0095	2		0.7905	0.0165	2		0.4215	0.0585	2		0.427	0.109	2		0.684	0.011	2			6.2		0.749	0.034	2		0.6605	0.0015	2		0.7615	0.0115	2		0.6585	0.0155	2		0.6675
6.217		0.8465	0.0065	2		0.644	0.112	2		0.769	0.011	2		0.7895	0.0155	2		0.419	0.061	2		0.426	0.108	2		0.6865	0.0095	2			6.217		0.7475	0.0335	2		0.659	0.001	2		0.7615	0.0095	2		0.662	0.018	2		0.666
6.233		0.847	0.008	2		0.6425	0.1135	2		0.7655	0.0135	2		0.788	0.017	2		0.418	0.059	2		0.423	0.107	2		0.684	0.011	2			6.233		0.75	0.031	2		0.661	0.005	2		0.76	0.01	2		0.664	0.02	2		0.6645
6.25		0.8465	0.0085	2		0.642	0.113	2		0.765	0.012	2		0.7885	0.0165	2		0.416	0.06	2		0.422	0.107	2		0.684	0.011	2			6.25		0.7475	0.0335	2		0.6595	0.0005	2		0.759	0.011	2		0.6595	0.0185	2		0.6675
6.267		0.844	0.007	2		0.6415	0.1145	2		0.764	0.014	2		0.7875	0.0175	2		0.415	0.06	2		0.42	0.106	2		0.6845	0.0125	2			6.267		0.75	0.034	2		0.656	0.001	2		0.765	0.011	2		0.661	0.02	2		0.6675
6.283		0.8445	0.0085	2		0.6405	0.1145	2		0.768	0.013	2		0.788	0.017	2		0.4125	0.0605	2		0.418	0.107	2		0.6845	0.0115	2			6.283		0.747	0.034	2		0.663	0.001	2		0.758	0.01	2		0.6595	0.0165	2		0.6655
6.3		0.843	0.007	2		0.6395	0.1145	2		0.766	0.011	2		0.7895	0.0165	2		0.4125	0.0595	2		0.416	0.106	2		0.6805	0.0115	2			6.3		0.748	0.034	2		0.6595	0.0005	2		0.759	0.01	2		0.66	0.018	2		0.664
6.317		0.8435	0.0085	2		0.6415	0.1155	2		0.7655	0.0125	2		0.788	0.016	2		0.4125	0.0605	2		0.4145	0.1055	2		0.682	0.011	2			6.317		0.749	0.034	2		0.658	0	2		0.761	0.009	2		0.6615	0.0175	2		0.6675
6.333		0.8435	0.0075	2		0.639	0.115	2		0.763	0.013	2		0.787	0.016	2		0.4105	0.0615	2		0.412	0.104	2		0.6805	0.0115	2			6.333		0.7475	0.0325	2		0.659	0.002	2		0.762	0.009	2		0.665	0.024	2		0.6645
6.35		0.8445	0.0075	2		0.6395	0.1155	2		0.7645	0.0125	2		0.786	0.017	2		0.409	0.062	2		0.411	0.104	2		0.6805	0.0115	2			6.35		0.7475	0.0325	2		0.658	0.002	2		0.762	0.013	2		0.6595	0.0185	2		0.664
6.367		0.844	0.007	2		0.6335	0.1155	2		0.7645	0.0105	2		0.787	0.016	2		0.406	0.058	2		0.4085	0.1035	2		0.6785	0.0115	2			6.367		0.7495	0.0325	2		0.659	0.002	2		0.7625	0.0115	2		0.662	0.021	2		0.665
6.383		0.844	0.004	2		0.638	0.113	2		0.763	0.013	2		0.786	0.016	2		0.409	0.063	2		0.4065	0.1025	2		0.6805	0.0115	2			6.383		0.7495	0.0305	2		0.66	0.006	2		0.7615	0.0115	2		0.6625	0.0195	2		0.6635
6.4		0.846	0.006	2		0.6375	0.1155	2		0.7645	0.0125	2		0.7865	0.0155	2		0.407	0.062	2		0.4035	0.1015	2		0.681	0.011	2			6.4		0.7455	0.0315	2		0.6595	0.0005	2		0.7605	0.0115	2		0.6585	0.0165	2		0.664
6.417		0.845	0.008	2		0.6405	0.1155	2		0.763	0.013	2		0.7855	0.0155	2		0.408	0.065	2		0.403	0.102	2		0.6815	0.0125	2			6.417		0.7455	0.0305	2		0.661	0.002	2		0.7615	0.0115	2		0.663	0.02	2		0.662
6.433		0.8435	0.0085	2		0.6405	0.1135	2		0.7615	0.0125	2		0.7845	0.0165	2		0.4085	0.0665	2		0.401	0.101	2		0.677	0.01	2			6.433		0.7455	0.0325	2		0.658	0.002	2		0.7605	0.0115	2		0.6635	0.0235	2		0.663
6.45		0.8405	0.0075	2		0.641	0.112	2		0.7625	0.0125	2		0.786	0.016	2		0.4085	0.0675	2		0.399	0.101	2		0.6775	0.0105	2			6.45		0.746	0.036	2		0.6545	0.0025	2		0.7605	0.0105	2		0.6605	0.0195	2		0.6615
6.467		0.843	0.007	2		0.64	0.115	2		0.7615	0.0125	2		0.7865	0.0155	2		0.406	0.066	2		0.3975	0.1005	2		0.679	0.012	2			6.467		0.746	0.031	2		0.6545	0.0015	2		0.7605	0.0115	2		0.661	0.023	2		0.6645
6.483		0.8425	0.0075	2		0.639	0.114	2		0.7605	0.0115	2		0.7885	0.0145	2		0.406	0.067	2		0.3945	0.1005	2		0.677	0.012	2			6.483		0.7455	0.0305	2		0.6595	0.0055	2		0.761	0.011	2		0.6565	0.0175	2		0.662
6.5		0.843	0.009	2		0.6375	0.1165	2		0.7615	0.0115	2		0.785	0.015	2		0.402	0.065	2		0.3925	0.0995	2		0.6775	0.0135	2			6.5		0.746	0.031	2		0.6575	0.0025	2		0.76	0.011	2		0.657	0.015	2		0.664
6.517		0.844	0.007	2		0.6365	0.1145	2		0.76	0.012	2		0.786	0.016	2		0.4025	0.0665	2		0.392	0.099	2		0.6765	0.0135	2			6.517		0.746	0.033	2		0.6585	0.0025	2		0.761	0.011	2		0.658	0.019	2		0.6625
6.533		0.843	0.008	2		0.6365	0.1145	2		0.7595	0.0135	2		0.783	0.016	2		0.4025	0.0665	2		0.3905	0.0985	2		0.677	0.011	2			6.533		0.747	0.032	2		0.659	0.003	2		0.761	0.011	2		0.6615	0.0225	2		0.663
6.55		0.8415	0.0075	2		0.6345	0.1135	2		0.76	0.011	2		0.7835	0.0155	2		0.401	0.067	2		0.388	0.097	2		0.6745	0.0125	2			6.55		0.7455	0.0335	2		0.6565	0.0035	2		0.7615	0.0105	2		0.6565	0.0175	2		0.6635
6.567		0.841	0.006	2		0.636	0.114	2		0.7605	0.0135	2		0.781	0.017	2		0.401	0.068	2		0.385	0.096	2		0.6735	0.0125	2			6.567		0.7465	0.0315	2		0.658	0.005	2		0.7625	0.0105	2		0.6585	0.0195	2		0.665
6.583		0.84	0.007	2		0.6335	0.1135	2		0.7575	0.0135	2		0.782	0.017	2		0.399	0.067	2		0.383	0.096	2		0.677	0.011	2			6.583		0.747	0.031	2		0.6585	0.0055	2		0.7615	0.0115	2		0.6625	0.0235	2		0.662
6.6		0.8415	0.0085	2		0.631	0.118	2		0.757	0.014	2		0.7845	0.0155	2		0.3945	0.0635	2		0.382	0.096	2		0.6745	0.0155	2			6.6		0.748	0.031	2		0.6575	0.0025	2		0.7645	0.0105	2		0.6565	0.0205	2		0.663
6.617		0.8415	0.0085	2		0.6335	0.1165	2		0.7575	0.0125	2		0.783	0.015	2		0.3965	0.0665	2		0.381	0.094	2		0.675	0.013	2			6.617		0.7485	0.0325	2		0.6565	0.0015	2		0.761	0.011	2		0.6635	0.0245	2		0.6645
6.633		0.839	0.007	2		0.631	0.117	2		0.7575	0.0135	2		0.782	0.016	2		0.395	0.065	2		0.378	0.093	2		0.674	0.013	2			6.633		0.7455	0.0285	2		0.659	0.005	2		0.76	0.01	2		0.659	0.022	2		0.6625
6.65		0.839	0.007	2		0.6285	0.1155	2		0.7575	0.0115	2		0.7815	0.0165	2		0.3935	0.0655	2		0.3755	0.0935	2		0.673	0.012	2			6.65		0.748	0.032	2		0.656	0.002	2		0.762	0.011	2		0.658	0.02	2		0.659
6.667		0.8395	0.0085	2		0.628	0.117	2		0.7575	0.0125	2		0.7775	0.0175	2		0.391	0.066	2		0.374	0.094	2		0.6735	0.0125	2			6.667		0.748	0.03	2		0.6555	0.0035	2		0.7565	0.0105	2		0.6555	0.0175	2		0.663
6.683		0.8405	0.0075	2		0.6295	0.1165	2		0.7585	0.0145	2		0.78	0.016	2		0.3925	0.0665	2		0.373	0.093	2		0.6725	0.0105	2			6.683		0.7455	0.0285	2		0.658	0.006	2		0.7595	0.0095	2		0.655	0.019	2		0.6625
6.7		0.839	0.009	2		0.6295	0.1165	2		0.7535	0.0105	2		0.7795	0.0155	2		0.3915	0.0675	2		0.371	0.092	2		0.669	0.009	2			6.7		0.744	0.033	2		0.6535	0.0045	2		0.7595	0.0135	2		0.657	0.02	2		0.666
6.717		0.8415	0.0085	2		0.6305	0.1165	2		0.7555	0.0125	2		0.78	0.016	2		0.391	0.068	2		0.3675	0.0905	2		0.6695	0.0115	2			6.717		0.7435	0.0315	2		0.6575	0.0025	2		0.758	0.011	2		0.657	0.02	2		0.662
6.733		0.8395	0.0065	2		0.632	0.116	2		0.7545	0.0135	2		0.7815	0.0155	2		0.392	0.07	2		0.3675	0.0915	2		0.6725	0.0135	2			6.733		0.7465	0.0325	2		0.659	0.005	2		0.76	0.012	2		0.654	0.018	2		0.658
6.75		0.8405	0.0055	2		0.6275	0.1165	2		0.7535	0.0155	2		0.7775	0.0155	2		0.389	0.068	2		0.365	0.09	2		0.6725	0.0115	2			6.75		0.748	0.032	2		0.657	0.002	2		0.7595	0.0105	2		0.66	0.022	2		0.663
6.767		0.841	0.007	2		0.63	0.118	2		0.7545	0.0135	2		0.7805	0.0155	2		0.388	0.07	2		0.363	0.09	2		0.671	0.012	2			6.767		0.743	0.031	2		0.655	0.003	2		0.7595	0.0125	2		0.6625	0.0245	2		0.662
6.783		0.8395	0.0065	2		0.6285	0.1175	2		0.7525	0.0145	2		0.779	0.015	2		0.3875	0.0685	2		0.361	0.088	2		0.671	0.011	2			6.783		0.7455	0.0325	2		0.655	0.003	2		0.7605	0.0105	2		0.656	0.019	2		0.665
6.8		0.84	0.008	2		0.6265	0.1185	2		0.7515	0.0135	2		0.7765	0.0165	2		0.3855	0.0675	2		0.3605	0.0885	2		0.6705	0.0115	2			6.8		0.7405	0.0355	2		0.6555	0.0025	2		0.757	0.011	2		0.6545	0.0175	2		0.6615
6.817		0.838	0.009	2		0.625	0.117	2		0.751	0.012	2		0.7785	0.0165	2		0.385	0.068	2		0.3575	0.0885	2		0.668	0.011	2			6.817		0.7435	0.0325	2		0.656	0.005	2		0.756	0.011	2		0.6555	0.0175	2		0.66
6.833		0.8375	0.0065	2		0.624	0.117	2		0.751	0.014	2		0.7775	0.0165	2		0.3845	0.0675	2		0.357	0.089	2		0.668	0.013	2			6.833		0.7425	0.0345	2		0.6555	0.0065	2		0.7575	0.0115	2		0.6625	0.0265	2		0.6595
6.85		0.8385	0.0095	2		0.6265	0.1165	2		0.7495	0.0155	2		0.775	0.017	2		0.385	0.07	2		0.3545	0.0885	2		0.6695	0.0135	2			6.85		0.747	0.036	2		0.6545	0.0035	2		0.759	0.012	2		0.6555	0.0195	2		0.66
6.867		0.84	0.008	2		0.623	0.118	2		0.7515	0.0145	2		0.7785	0.0155	2		0.3825	0.0675	2		0.3525	0.0865	2		0.669	0.011	2			6.867		0.7445	0.0325	2		0.657	0.005	2		0.759	0.011	2		0.6545	0.0195	2		0.66
6.883		0.8355	0.0085	2		0.624	0.121	2		0.751	0.013	2		0.774	0.017	2		0.381	0.067	2		0.3515	0.0865	2		0.669	0.012	2			6.883		0.7435	0.0345	2		0.6525	0.0025	2		0.755	0.011	2		0.6555	0.0205	2		0.659
6.9		0.837	0.01	2		0.626	0.119	2		0.7505	0.0135	2		0.775	0.016	2		0.382	0.07	2		0.3505	0.0865	2		0.666	0.013	2			6.9		0.747	0.033	2		0.652	0.001	2		0.7575	0.0105	2		0.655	0.02	2		0.66
6.917		0.838	0.008	2		0.6245	0.1195	2		0.751	0.012	2		0.7765	0.0165	2		0.38	0.07	2		0.348	0.085	2		0.667	0.012	2			6.917		0.744	0.034	2		0.656	0.006	2		0.7625	0.0105	2		0.6555	0.0215	2		0.6575
6.933		0.8385	0.0075	2		0.6245	0.1205	2		0.7505	0.0145	2		0.7755	0.0175	2		0.38	0.069	2		0.347	0.085	2		0.664	0.012	2			6.933		0.7455	0.0325	2		0.6555	0.0025	2		0.755	0.011	2		0.6545	0.0195	2		0.6585
6.95		0.838	0.008	2		0.6245	0.1205	2		0.749	0.014	2		0.7745	0.0165	2		0.379	0.07	2		0.3455	0.0845	2		0.6655	0.0125	2			6.95		0.7455	0.0335	2		0.6535	0.0015	2		0.757	0.01	2		0.653	0.019	2		0.6575
6.967		0.838	0.009	2		0.621	0.119	2		0.748	0.015	2		0.774	0.017	2		0.3775	0.0695	2		0.343	0.083	2		0.6635	0.0145	2			6.967		0.7445	0.0325	2		0.655	0.004	2		0.7595	0.0085	2		0.652	0.018	2		0.6585
6.983		0.836	0.009	2		0.62	0.121	2		0.747	0.015	2		0.7735	0.0175	2		0.376	0.068	2		0.3415	0.0835	2		0.6645	0.0135	2			6.983		0.7435	0.0335	2		0.6555	0.0075	2		0.7605	0.0115	2		0.6555	0.0215	2		0.656
7		0.8375	0.0075	2		0.6235	0.1215	2		0.746	0.015	2		0.775	0.016	2		0.376	0.071	2		0.34	0.083	2		0.6665	0.0135	2			7		0.742	0.032	2		0.656	0.005	2		0.7685	0.0105	2		0.6515	0.0175	2		0.6585
7.017		0.8385	0.0075	2		0.621	0.122	2		0.7475	0.0145	2		0.774	0.016	2		0.374	0.07	2		0.337	0.081	2		0.6655	0.0135	2			7.017		0.7435	0.0345	2		0.6545	0.0035	2		0.758	0.011	2		0.653	0.017	2		0.656
7.033		0.838	0.008	2		0.6205	0.1215	2		0.747	0.013	2		0.7725	0.0165	2		0.374	0.069	2		0.3345	0.0795	2		0.6635	0.0135	2			7.033		0.7435	0.0335	2		0.6545	0.0035	2		0.759	0.012	2		0.6575	0.0235	2		0.657
7.05		0.838	0.009	2		0.62	0.122	2		0.747	0.016	2		0.772	0.016	2		0.372	0.07	2		0.334	0.08	2		0.6625	0.0135	2			7.05		0.7425	0.0325	2		0.655	0.005	2		0.7585	0.0115	2		0.6575	0.0235	2		0.6575
7.067		0.837	0.01	2		0.6185	0.1215	2		0.7445	0.0135	2		0.771	0.016	2		0.372	0.07	2		0.332	0.078	2		0.664	0.012	2			7.067		0.7445	0.0325	2		0.6555	0.0035	2		0.7595	0.0115	2		0.652	0.019	2		0.6575
7.083		0.8385	0.0075	2		0.619	0.123	2		0.7455	0.0135	2		0.769	0.016	2		0.371	0.069	2		0.3305	0.0785	2		0.6635	0.0105	2			7.083		0.744	0.032	2		0.658	0.005	2		0.7585	0.0085	2		0.653	0.02	2		0.6585
7.1		0.836	0.008	2		0.6195	0.1215	2		0.7465	0.0125	2		0.7705	0.0165	2		0.3705	0.0715	2		0.3275	0.0765	2		0.662	0.011	2			7.1		0.7425	0.0345	2		0.6555	0.0065	2		0.757	0.012	2		0.659	0.025	2		0.6525
7.117		0.8365	0.0085	2		0.621	0.121	2		0.746	0.014	2		0.7715	0.0165	2		0.372	0.072	2		0.327	0.076	2		0.6615	0.0115	2			7.117		0.7395	0.0305	2		0.654	0.004	2		0.756	0.011	2		0.6525	0.0185	2		0.656
7.133		0.837	0.008	2		0.62	0.121	2		0.742	0.015	2		0.77	0.016	2		0.3715	0.0715	2		0.324	0.077	2		0.662	0.014	2			7.133		0.7425	0.0335	2		0.6515	0.0045	2		0.758	0.011	2		0.6525	0.0225	2		0.6545
7.15		0.839	0.008	2		0.618	0.121	2		0.744	0.013	2		0.7685	0.0165	2		0.3695	0.0715	2		0.3235	0.0755	2		0.659	0.013	2			7.15		0.742	0.034	2		0.6525	0.0045	2		0.75	0.011	2		0.6515	0.0205	2		0.6565
7.167		0.8345	0.0065	2		0.6165	0.1235	2		0.741	0.015	2		0.77	0.018	2		0.3665	0.0705	2		0.3215	0.0755	2		0.66	0.013	2			7.167		0.7445	0.0325	2		0.6525	0.0045	2		0.753	0.012	2		0.6505	0.0205	2		0.6545
7.183		0.836	0.008	2		0.618	0.124	2		0.743	0.015	2		0.7695	0.0165	2		0.366	0.071	2		0.321	0.075	2		0.66	0.011	2			7.183		0.7435	0.0315	2		0.651	0.003	2		0.7545	0.0115	2		0.653	0.02	2		0.654
7.2		0.836	0.009	2		0.616	0.124	2		0.7415	0.0155	2		0.771	0.017	2		0.3645	0.0705	2		0.319	0.074	2		0.659	0.014	2			7.2		0.742	0.033	2		0.6565	0.0045	2		0.7575	0.0115	2		0.6515	0.0205	2		0.6545
7.217		0.8335	0.0055	2		0.613	0.125	2		0.744	0.014	2		0.7675	0.0175	2		0.3625	0.0685	2		0.3175	0.0735	2		0.6585	0.0135	2			7.217		0.741	0.033	2		0.6535	0.0045	2		0.7575	0.0095	2		0.6555	0.0225	2		0.655
7.233		0.833	0.011	2		0.6155	0.1255	2		0.741	0.013	2		0.7695	0.0165	2		0.3625	0.0705	2		0.3155	0.0735	2		0.6605	0.0135	2			7.233		0.742	0.033	2		0.654	0.002	2		0.757	0.013	2		0.654	0.023	2		0.6535
7.25		0.836	0.008	2		0.6135	0.1255	2		0.7425	0.0145	2		0.77	0.016	2		0.362	0.069	2		0.314	0.072	2		0.6575	0.0125	2			7.25		0.7405	0.0345	2		0.655	0.002	2		0.763	0.011	2		0.655	0.023	2		0.652
7.267		0.837	0.008	2		0.614	0.125	2		0.7425	0.0135	2		0.767	0.017	2		0.3615	0.0715	2		0.312	0.073	2		0.657	0.013	2			7.267		0.7435	0.0325	2		0.6545	0.0035	2		0.759	0.011	2		0.6565	0.0245	2		0.6555
7.283		0.8335	0.0095	2		0.61	0.124	2		0.742	0.015	2		0.7675	0.0175	2		0.359	0.07	2		0.311	0.071	2		0.6555	0.0115	2			7.283		0.7415	0.0305	2		0.6535	0.0045	2		0.762	0.011	2		0.651	0.019	2		0.6545
7.3		0.8345	0.0075	2		0.6115	0.1255	2		0.743	0.013	2		0.7685	0.0165	2		0.3595	0.0695	2		0.309	0.07	2		0.6545	0.0125	2			7.3		0.743	0.03	2		0.655	0.005	2		0.763	0.011	2		0.657	0.025	2		0.6535
7.317		0.834	0.009	2		0.612	0.124	2		0.74	0.013	2		0.767	0.017	2		0.3595	0.0715	2		0.308	0.07	2		0.6565	0.0145	2			7.317		0.7405	0.0325	2		0.654	0.004	2		0.7585	0.0105	2		0.6505	0.0195	2		0.6525
7.333		0.833	0.007	2		0.612	0.124	2		0.7415	0.0135	2		0.768	0.017	2		0.359	0.072	2		0.3055	0.0675	2		0.655	0.014	2			7.333		0.737	0.032	2		0.6515	0.0045	2		0.758	0.013	2		0.6515	0.0205	2		0.655
7.35		0.8335	0.0055	2		0.611	0.126	2		0.74	0.016	2		0.7675	0.0175	2		0.3565	0.0705	2		0.3025	0.0675	2		0.6535	0.0145	2			7.35		0.7445	0.0335	2		0.6545	0.0045	2		0.758	0.009	2		0.652	0.022	2		0.652
7.367		0.836	0.006	2		0.611	0.126	2		0.7405	0.0125	2		0.764	0.017	2		0.3565	0.0715	2		0.3015	0.0665	2		0.6545	0.0135	2			7.367		0.743	0.035	2		0.649	0.003	2		0.752	0.011	2		0.6495	0.0195	2		0.6535
7.383		0.8325	0.0065	2		0.6105	0.1245	2		0.739	0.012	2		0.767	0.016	2		0.3565	0.0725	2		0.301	0.067	2		0.652	0.014	2			7.383		0.7425	0.0335	2		0.648	0.007	2		0.7535	0.0115	2		0.653	0.022	2		0.652
7.4		0.8345	0.0085	2		0.608	0.124	2		0.7395	0.0125	2		0.767	0.016	2		0.3555	0.0715	2		0.2985	0.0665	2		0.6535	0.0145	2			7.4		0.738	0.031	2		0.653	0.006	2		0.754	0.011	2		0.6565	0.0245	2		0.6525
7.417		0.8335	0.0075	2		0.61	0.125	2		0.7365	0.0125	2		0.7625	0.0175	2		0.3555	0.0715	2		0.297	0.065	2		0.655	0.014	2			7.417		0.741	0.032	2		0.6525	0.0045	2		0.7555	0.0115	2		0.656	0.028	2		0.6525
7.433		0.8325	0.0075	2		0.611	0.124	2		0.738	0.016	2		0.7655	0.0165	2		0.356	0.074	2		0.2955	0.0635	2		0.654	0.013	2			7.433		0.74	0.033	2		0.6555	0.0085	2		0.759	0.011	2		0.655	0.026	2		0.6495
7.45		0.8315	0.0085	2		0.6085	0.1255	2		0.7365	0.0155	2		0.7655	0.0165	2		0.353	0.073	2		0.294	0.064	2		0.6505	0.0145	2			7.45		0.742	0.032	2		0.6505	0.0015	2		0.7545	0.0115	2		0.6545	0.0255	2		0.6495
7.467		0.833	0.008	2		0.607	0.126	2		0.7365	0.0125	2		0.7625	0.0175	2		0.3515	0.0715	2		0.2925	0.0625	2		0.6525	0.0135	2			7.467		0.739	0.029	2		0.6495	0.0025	2		0.754	0.012	2		0.651	0.022	2		0.6505
7.483		0.833	0.008	2		0.6105	0.1235	2		0.7365	0.0135	2		0.7615	0.0185	2		0.3545	0.0755	2		0.29	0.062	2		0.6505	0.0145	2			7.483		0.7365	0.0315	2		0.652	0.005	2		0.7575	0.0105	2		0.651	0.024	2		0.6525
7.5		0.8365	0.0085	2		0.6075	0.1245	2		0.737	0.015	2		0.766	0.016	2		0.352	0.073	2		0.2885	0.0615	2		0.65	0.014	2			7.5		0.738	0.034	2		0.653	0.005	2		0.7575	0.0115	2		0.653	0.025	2		0.652
7.517		0.8345	0.0085	2		0.6065	0.1245	2		0.7345	0.0145	2		0.7625	0.0175	2		0.351	0.073	2		0.287	0.061	2		0.6505	0.0145	2			7.517		0.7395	0.0315	2		0.6505	0.0055	2		0.756	0.009	2		0.6525	0.0245	2		0.649
7.533		0.8325	0.0105	2		0.605	0.127	2		0.7345	0.0115	2		0.764	0.017	2		0.348	0.072	2		0.2865	0.0605	2		0.6525	0.0135	2			7.533		0.7395	0.0335	2		0.6535	0.0085	2		0.7545	0.0115	2		0.655	0.025	2		0.6495
7.55		0.8275	0.0115	2		0.6055	0.1245	2		0.734	0.013	2		0.7615	0.0175	2		0.349	0.074	2		0.286	0.06	2		0.651	0.015	2			7.55		0.7365	0.0325	2		0.6515	0.0005	2		0.757	0.011	2		0.652	0.024	2		0.649
7.567		0.8305	0.0085	2		0.605	0.126	2		0.7345	0.0125	2		0.7595	0.0185	2		0.3485	0.0725	2		0.283	0.059	2		0.65	0.014	2			7.567		0.7385	0.0325	2		0.6535	0.0025	2		0.759	0.011	2		0.6475	0.0205	2		0.651
7.583		0.831	0.008	2		0.6045	0.1265	2		0.734	0.012	2		0.7605	0.0175	2		0.3465	0.0735	2		0.281	0.058	2		0.6495	0.0145	2			7.583		0.7415	0.0315	2		0.6545	0.0075	2		0.7585	0.0115	2		0.653	0.026	2		0.6505
7.6		0.83	0.007	2		0.6065	0.1265	2		0.737	0.013	2		0.762	0.016	2		0.348	0.074	2		0.2805	0.0575	2		0.6505	0.0155	2			7.6		0.74	0.032	2		0.652	0.003	2		0.7595	0.0115	2		0.649	0.021	2		0.649
7.617		0.828	0.006	2		0.6055	0.1275	2		0.736	0.012	2		0.761	0.016	2		0.346	0.074	2		0.279	0.057	2		0.6475	0.0155	2			7.617		0.738	0.032	2		0.649	0.003	2		0.76	0.012	2		0.653	0.024	2		0.6475
7.633		0.829	0.008	2		0.605	0.127	2		0.734	0.013	2		0.761	0.017	2		0.345	0.075	2		0.276	0.056	2		0.6485	0.0135	2			7.633		0.7395	0.0325	2		0.653	0.003	2		0.76	0.009	2		0.6535	0.0235	2		0.649
7.65		0.831	0.007	2		0.6035	0.1285	2		0.735	0.014	2		0.7605	0.0165	2		0.344	0.073	2		0.276	0.056	2		0.6485	0.0145	2			7.65		0.7405	0.0325	2		0.653	0.004	2		0.758	0.012	2		0.6475	0.0225	2		0.6465
7.667		0.8305	0.0075	2		0.604	0.128	2		0.733	0.013	2		0.7615	0.0155	2		0.3435	0.0745	2		0.2745	0.0545	2		0.648	0.014	2			7.667		0.74	0.031	2		0.6525	0.0045	2		0.758	0.011	2		0.652	0.027	2		0.6485
7.683		0.832	0.006	2		0.6055	0.1265	2		0.733	0.014	2		0.758	0.018	2		0.3445	0.0765	2		0.2725	0.0535	2		0.648	0.015	2			7.683		0.7395	0.0335	2		0.653	0.004	2		0.757	0.01	2		0.654	0.027	2		0.648
7.7		0.829	0.007	2		0.6055	0.1295	2		0.734	0.013	2		0.757	0.018	2		0.343	0.075	2		0.27	0.053	2		0.648	0.015	2			7.7		0.741	0.031	2		0.6515	0.0045	2		0.758	0.011	2		0.647	0.021	2		0.649
7.717		0.8275	0.0065	2		0.6025	0.1275	2		0.732	0.013	2		0.76	0.017	2		0.342	0.075	2		0.269	0.054	2		0.647	0.014	2			7.717		0.7405	0.0315	2		0.651	0.002	2		0.7575	0.0105	2		0.652	0.025	2		0.647
7.733		0.829	0.007	2		0.606	0.128	2		0.7325	0.0135	2		0.76	0.017	2		0.343	0.077	2		0.268	0.051	2		0.647	0.015	2			7.733		0.738	0.032	2		0.653	0.003	2		0.7595	0.0115	2		0.6505	0.0245	2		0.648
7.75		0.832	0.008	2		0.6	0.128	2		0.728	0.014	2		0.7585	0.0165	2		0.3405	0.0735	2		0.266	0.05	2		0.6455	0.0145	2			7.75		0.736	0.031	2		0.6535	0.0065	2		0.7575	0.0105	2		0.646	0.022	2		0.647
7.767		0.83	0.01	2		0.5985	0.1285	2		0.731	0.013	2		0.758	0.017	2		0.338	0.074	2		0.265	0.051	2		0.644	0.014	2			7.767		0.735	0.034	2		0.652	0.006	2		0.759	0.011	2		0.649	0.024	2		0.6475
7.783		0.831	0.01	2		0.6035	0.1285	2		0.7285	0.0105	2		0.755	0.018	2		0.3405	0.0765	2		0.263	0.05	2		0.645	0.014	2			7.783		0.7385	0.0315	2		0.6495	0.0015	2		0.7595	0.0105	2		0.648	0.022	2		0.6485
7.8		0.83	0.008	2		0.602	0.129	2		0.729	0.013	2		0.756	0.018	2		0.3395	0.0755	2		0.261	0.049	2		0.645	0.014	2			7.8		0.74	0.032	2		0.6515	0.0045	2		0.756	0.012	2		0.6485	0.0235	2		0.6465
7.817		0.8275	0.0085	2		0.5995	0.1285	2		0.7285	0.0115	2		0.757	0.017	2		0.3375	0.0745	2		0.2615	0.0485	2		0.6435	0.0155	2			7.817		0.738	0.033	2		0.6495	0.0085	2		0.7575	0.0105	2		0.6525	0.0255	2		0.644
7.833		0.8275	0.0115	2		0.5995	0.1315	2		0.73	0.014	2		0.7595	0.0165	2		0.3355	0.0735	2		0.2595	0.0475	2		0.6435	0.0165	2			7.833		0.7365	0.0325	2		0.65	0.005	2		0.7585	0.0115	2		0.649	0.025	2		0.644
7.85		0.8275	0.0115	2		0.6025	0.1295	2		0.728	0.012	2		0.7555	0.0175	2		0.3375	0.0765	2		0.2575	0.0475	2		0.6445	0.0175	2			7.85		0.738	0.029	2		0.6485	0.0055	2		0.757	0.01	2		0.652	0.027	2		0.6475
7.867		0.8255	0.0085	2		0.5985	0.1295	2		0.73	0.012	2		0.755	0.017	2		0.3345	0.0745	2		0.2565	0.0465	2		0.643	0.015	2			7.867		0.7345	0.0315	2		0.6485	0.0035	2		0.7565	0.0115	2		0.646	0.02	2		0.648
7.883		0.8255	0.0105	2		0.598	0.131	2		0.729	0.013	2		0.756	0.017	2		0.334	0.073	2		0.256	0.046	2		0.643	0.015	2			7.883		0.735	0.03	2		0.6495	0.0035	2		0.757	0.012	2		0.6495	0.0265	2		0.646
7.9		0.825	0.011	2		0.5965	0.1305	2		0.7275	0.0145	2		0.756	0.018	2		0.333	0.074	2		0.2535	0.0455	2		0.642	0.015	2			7.9		0.7365	0.0325	2		0.6505	0.0045	2		0.761	0.011	2		0.6505	0.0245	2		0.6465
7.917		0.8255	0.0095	2		0.5975	0.1305	2		0.728	0.015	2		0.7565	0.0165	2		0.333	0.075	2		0.2525	0.0445	2		0.6415	0.0155	2			7.917		0.734	0.035	2		0.651	0.004	2		0.7565	0.0115	2		0.647	0.023	2		0.646
7.933		0.8295	0.0095	2		0.5975	0.1315	2		0.727	0.014	2		0.754	0.017	2		0.333	0.074	2		0.25	0.043	2		0.642	0.016	2			7.933		0.7375	0.0325	2		0.6525	0.0065	2		0.757	0.011	2		0.647	0.024	2		0.6455
7.95		0.826	0.009	2		0.596	0.13	2		0.7265	0.0135	2		0.756	0.017	2		0.332	0.075	2		0.2505	0.0435	2		0.641	0.018	2			7.95		0.7335	0.0315	2		0.6505	0.0055	2		0.757	0.011	2		0.647	0.024	2		0.649
7.967		0.8265	0.0095	2		0.594	0.131	2		0.724	0.013	2		0.7555	0.0175	2		0.3305	0.0735	2		0.2485	0.0435	2		0.639	0.016	2			7.967		0.737	0.033	2		0.656	0.002	2		0.758	0.011	2		0.6455	0.0235	2		0.645
7.983		0.8275	0.0085	2		0.5935	0.1295	2		0.7265	0.0115	2		0.753	0.016	2		0.3305	0.0745	2		0.2475	0.0425	2		0.6385	0.0145	2			7.983		0.738	0.031	2		0.648	0.005	2		0.754	0.011	2		0.6445	0.0215	2		0.642
8		0.8275	0.0105	2		0.5925	0.1305	2		0.7245	0.0125	2		0.754	0.017	2		0.3285	0.0735	2		0.245	0.042	2		0.64	0.015	2			8		0.736	0.028	2		0.6505	0.0055	2		0.756	0.01	2		0.6455	0.0225	2		0.6455
8.017		0.827	0.007	2		0.5945	0.1305	2		0.7255	0.0135	2		0.7545	0.0165	2		0.3285	0.0755	2		0.244	0.04	2		0.638	0.013	2			8.017		0.737	0.031	2		0.6515	0.0025	2		0.757	0.011	2		0.6455	0.0225	2		0.644
8.033		0.8275	0.0095	2		0.592	0.132	2		0.7235	0.0145	2		0.754	0.016	2		0.327	0.073	2		0.242	0.039	2		0.6395	0.0155	2			8.033		0.735	0.03	2		0.652	0.003	2		0.758	0.011	2		0.6475	0.0265	2		0.6405
8.05		0.8275	0.0085	2		0.594	0.131	2		0.724	0.013	2		0.7535	0.0165	2		0.3275	0.0755	2		0.24	0.04	2		0.6385	0.0155	2			8.05		0.734	0.032	2		0.653	0.003	2		0.76	0.011	2		0.6415	0.0205	2		0.644
8.067		0.8255	0.0085	2		0.5945	0.1305	2		0.724	0.012	2		0.7515	0.0175	2		0.328	0.076	2		0.24	0.038	2		0.6385	0.0145	2			8.067		0.739	0.033	2		0.65	0.004	2		0.759	0.011	2		0.6445	0.0225	2		0.643
8.083		0.8255	0.0095	2		0.592	0.13	2		0.724	0.012	2		0.7495	0.0175	2		0.3275	0.0755	2		0.238	0.038	2		0.637	0.014	2			8.083		0.7345	0.0325	2		0.6515	0.0035	2		0.76	0.011	2		0.644	0.021	2		0.644
8.1		0.8245	0.0135	2		0.593	0.132	2		0.7215	0.0115	2		0.753	0.017	2		0.3255	0.0755	2		0.2375	0.0365	2		0.634	0.015	2			8.1		0.7365	0.0325	2		0.649	0.005	2		0.756	0.011	2		0.6495	0.0285	2		0.64
8.117		0.823	0.011	2		0.5925	0.1315	2		0.722	0.011	2		0.752	0.017	2		0.326	0.076	2		0.2355	0.0365	2		0.6375	0.0155	2			8.117		0.7345	0.0335	2		0.6495	0.0065	2		0.761	0.011	2		0.644	0.022	2		0.6435
8.133		0.825	0.011	2		0.595	0.131	2		0.7245	0.0115	2		0.752	0.017	2		0.327	0.078	2		0.235	0.036	2		0.6365	0.0145	2			8.133		0.7325	0.0315	2		0.652	0.005	2		0.7525	0.0115	2		0.643	0.022	2		0.641
8.15		0.824	0.011	2		0.594	0.131	2		0.7235	0.0105	2		0.751	0.017	2		0.3255	0.0775	2		0.233	0.035	2		0.636	0.016	2			8.15		0.735	0.033	2		0.65	0.006	2		0.757	0.011	2		0.6435	0.0215	2		0.642
8.167		0.826	0.012	2		0.593	0.129	2		0.721	0.012	2		0.753	0.016	2		0.3255	0.0785	2		0.232	0.035	2		0.636	0.014	2			8.167		0.7325	0.0335	2		0.65	0.004	2		0.7585	0.0105	2		0.643	0.024	2		0.639
8.183		0.825	0.011	2		0.5905	0.1315	2		0.7205	0.0095	2		0.7505	0.0165	2		0.3235	0.0755	2		0.2305	0.0345	2		0.636	0.015	2			8.183		0.7335	0.0305	2		0.647	0	2		0.755	0.011	2		0.6475	0.0275	2		0.64
8.2		0.8225	0.0105	2		0.59	0.13	2		0.7215	0.0125	2		0.75	0.017	2		0.3225	0.0775	2		0.23	0.033	2		0.635	0.015	2			8.2		0.734	0.032	2		0.647	0.002	2		0.7525	0.0115	2		0.6485	0.0295	2		0.6405
8.217		0.8245	0.0115	2		0.5895	0.1315	2		0.7205	0.0135	2		0.7505	0.0175	2		0.3215	0.0765	2		0.228	0.033	2		0.6345	0.0155	2			8.217		0.731	0.034	2		0.649	0.003	2		0.7565	0.0085	2		0.6435	0.0225	2		0.6425
8.233		0.823	0.01	2		0.5885	0.1305	2		0.719	0.012	2		0.7495	0.0165	2		0.321	0.076	2		0.2265	0.0325	2		0.635	0.015	2			8.233		0.734	0.034	2		0.6475	0.0005	2		0.758	0.012	2		0.6435	0.0245	2		0.639
8.25		0.824	0.01	2		0.59	0.131	2		0.7175	0.0105	2		0.749	0.016	2		0.321	0.077	2		0.225	0.032	2		0.6345	0.0145	2			8.25		0.737	0.032	2		0.6435	0.0035	2		0.7595	0.0125	2		0.6415	0.0215	2		0.642
8.267		0.824	0.01	2		0.5895	0.1305	2		0.7175	0.0105	2		0.7485	0.0155	2		0.3215	0.0775	2		0.224	0.032	2		0.6355	0.0165	2			8.267		0.734	0.033	2		0.6485	0.0025	2		0.758	0.01	2		0.6405	0.0225	2		0.6395
8.283		0.825	0.01	2		0.586	0.131	2		0.7195	0.0135	2		0.7455	0.0175	2		0.3195	0.0755	2		0.2225	0.0305	2		0.633	0.018	2			8.283		0.7335	0.0295	2		0.648	0.005	2		0.7585	0.0095	2		0.6485	0.0275	2		0.6385
8.3		0.825	0.009	2		0.5885	0.1295	2		0.718	0.014	2		0.748	0.017	2		0.3205	0.0785	2		0.222	0.03	2		0.634	0.017	2			8.3		0.7345	0.0315	2		0.648	0.003	2		0.7575	0.0115	2		0.65	0.029	2		0.6375
8.317		0.823	0.009	2		0.585	0.131	2		0.7165	0.0145	2		0.748	0.017	2		0.318	0.076	2		0.2205	0.0295	2		0.633	0.015	2			8.317		0.734	0.033	2		0.6485	0.0055	2		0.757	0.011	2		0.6455	0.0275	2		0.64
8.333		0.824	0.009	2		0.591	0.129	2		0.7165	0.0115	2		0.7485	0.0165	2		0.3215	0.0805	2		0.219	0.029	2		0.6315	0.0155	2			8.333		0.733	0.032	2		0.6475	0.0035	2		0.756	0.011	2		0.639	0.023	2		0.6385
8.35		0.824	0.009	2		0.5855	0.1325	2		0.718	0.01	2		0.7455	0.0175	2		0.317	0.076	2		0.2175	0.0285	2		0.6325	0.0155	2			8.35		0.731	0.036	2		0.6455	0.0005	2		0.756	0.011	2		0.6415	0.0235	2		0.6405
8.367		0.8205	0.0105	2		0.589	0.13	2		0.719	0.013	2		0.747	0.017	2		0.319	0.08	2		0.216	0.027	2		0.6305	0.0165	2			8.367		0.7335	0.0315	2		0.646	0.003	2		0.756	0.011	2		0.6435	0.0235	2		0.639
8.383		0.823	0.01	2		0.59	0.129	2		0.717	0.013	2		0.745	0.017	2		0.3205	0.0805	2		0.2155	0.0265	2		0.6325	0.0165	2			8.383		0.7325	0.0285	2		0.647	0.004	2		0.756	0.011	2		0.644	0.025	2		0.636
8.4		0.8205	0.0115	2		0.588	0.13	2		0.716	0.012	2		0.745	0.017	2		0.318	0.079	2		0.214	0.026	2		0.6315	0.0155	2			8.4		0.732	0.031	2		0.6465	0.0045	2		0.754	0.011	2		0.6475	0.0285	2		0.6395
8.417		0.8215	0.0125	2		0.5875	0.1305	2		0.7175	0.0115	2		0.748	0.016	2		0.317	0.08	2		0.2135	0.0255	2		0.633	0.015	2			8.417		0.731	0.034	2		0.65	0.005	2		0.7555	0.0105	2		0.6415	0.0235	2		0.6425
8.433		0.8225	0.0105	2		0.5865	0.1315	2		0.7155	0.0115	2		0.747	0.017	2		0.317	0.078	2		0.212	0.025	2		0.629	0.016	2			8.433		0.7315	0.0355	2		0.6485	0.0055	2		0.756	0.011	2		0.64	0.021	2		0.6405
8.45		0.823	0.011	2		0.5895	0.1295	2		0.7155	0.0125	2		0.747	0.017	2		0.3185	0.0815	2		0.211	0.025	2		0.63	0.017	2			8.45		0.7335	0.0335	2		0.649	0.005	2		0.7535	0.0105	2		0.6415	0.0225	2		0.6415
8.467		0.8225	0.0115	2		0.5855	0.1295	2		0.7145	0.0115	2		0.7455	0.0165	2		0.316	0.079	2		0.21	0.023	2		0.6285	0.0185	2			8.467		0.729	0.034	2		0.6455	0.0055	2		0.7545	0.0105	2		0.648	0.029	2		0.641
8.483		0.821	0.011	2		0.5855	0.1315	2		0.7145	0.0115	2		0.7445	0.0165	2		0.3145	0.0785	2		0.2085	0.0235	2		0.6295	0.0165	2			8.483		0.734	0.033	2		0.645	0.003	2		0.755	0.011	2		0.6415	0.0245	2		0.6395
8.5		0.8195	0.0115	2		0.585	0.132	2		0.714	0.011	2		0.747	0.017	2		0.3145	0.0775	2		0.2075	0.0235	2		0.626	0.016	2			8.5		0.7315	0.0335	2		0.6475	0.0025	2		0.757	0.011	2		0.6425	0.0265	2		0.6395
8.517		0.8205	0.0105	2		0.5845	0.1335	2		0.714	0.012	2		0.7435	0.0165	2		0.3125	0.0775	2		0.2065	0.0225	2		0.6285	0.0165	2			8.517		0.733	0.031	2		0.6465	0.0045	2		0.7565	0.0115	2		0.6435	0.0285	2		0.639
8.533		0.822	0.01	2		0.584	0.133	2		0.712	0.012	2		0.7435	0.0155	2		0.311	0.078	2		0.205	0.022	2		0.628	0.018	2			8.533		0.7305	0.0335	2		0.6495	0.0045	2		0.756	0.011	2		0.6405	0.0225	2		0.6425
8.55		0.8205	0.0095	2		0.5815	0.1325	2		0.713	0.01	2		0.747	0.016	2		0.311	0.077	2		0.2035	0.0215	2		0.6285	0.0165	2			8.55		0.73	0.03	2		0.645	0.004	2		0.755	0.012	2		0.64	0.023	2		0.6395
8.567		0.821	0.013	2		0.582	0.132	2		0.7125	0.0125	2		0.7445	0.0165	2		0.311	0.078	2		0.203	0.02	2		0.6255	0.0155	2			8.567		0.733	0.033	2		0.6465	0.0055	2		0.7555	0.0115	2		0.645	0.026	2		0.64
8.583		0.8205	0.0095	2		0.5795	0.1315	2		0.711	0.013	2		0.7405	0.0175	2		0.31	0.077	2		0.2025	0.0215	2		0.626	0.015	2			8.583		0.733	0.031	2		0.6445	0.0025	2		0.7545	0.0115	2		0.6415	0.0255	2		0.6375
8.6		0.821	0.011	2		0.5815	0.1315	2		0.713	0.012	2		0.7435	0.0165	2		0.311	0.078	2		0.2015	0.0205	2		0.626	0.016	2			8.6		0.731	0.034	2		0.646	0.004	2		0.7535	0.0095	2		0.6425	0.0265	2		0.638
8.617		0.821	0.011	2		0.5805	0.1325	2		0.711	0.013	2		0.7435	0.0155	2		0.309	0.078	2		0.1995	0.0205	2		0.625	0.019	2			8.617		0.73	0.03	2		0.6445	0.0035	2		0.753	0.013	2		0.6425	0.0255	2		0.6375
8.633		0.8225	0.0125	2		0.5795	0.1335	2		0.7105	0.0115	2		0.743	0.017	2		0.3085	0.0765	2		0.199	0.019	2		0.625	0.016	2			8.633		0.733	0.031	2		0.6445	0.0055	2		0.7585	0.0115	2		0.6365	0.0205	2		0.6435
8.65		0.8215	0.0095	2		0.581	0.133	2		0.711	0.011	2		0.7405	0.0175	2		0.3085	0.0785	2		0.1975	0.0175	2		0.626	0.017	2			8.65		0.7285	0.0305	2		0.6425	0.0045	2		0.7555	0.0115	2		0.644	0.029	2		0.6405
8.667		0.8215	0.0095	2		0.578	0.134	2		0.712	0.012	2		0.7415	0.0165	2		0.306	0.076	2		0.1965	0.0175	2		0.6235	0.0165	2			8.667		0.734	0.031	2		0.6435	0.0015	2		0.754	0.012	2		0.643	0.029	2		0.644
8.683		0.818	0.01	2		0.581	0.131	2		0.7115	0.0125	2		0.741	0.017	2		0.309	0.08	2		0.1945	0.0165	2		0.625	0.018	2			8.683		0.734	0.032	2		0.647	0.004	2		0.755	0.012	2		0.638	0.023	2		0.636
8.7		0.817	0.012	2		0.5805	0.1315	2		0.7115	0.0125	2		0.74	0.017	2		0.308	0.079	2		0.1945	0.0155	2		0.6235	0.0165	2			8.7		0.7325	0.0325	2		0.644	0	2		0.756	0.011	2		0.6455	0.0315	2		0.64
8.717		0.818	0.011	2		0.578	0.129	2		0.7105	0.0125	2		0.7405	0.0165	2		0.3075	0.0795	2		0.193	0.016	2		0.624	0.018	2			8.717		0.731	0.032	2		0.6465	0.0025	2		0.7555	0.0115	2		0.6435	0.0285	2		0.6425
8.733		0.818	0.013	2		0.5795	0.1305	2		0.7085	0.0105	2		0.739	0.017	2		0.308	0.08	2		0.1925	0.0155	2		0.623	0.017	2			8.733		0.7345	0.0335	2		0.6455	0.0035	2		0.756	0.011	2		0.641	0.026	2		0.64
8.75		0.818	0.012	2		0.58	0.131	2		0.71	0.01	2		0.7395	0.0165	2		0.307	0.081	2		0.1905	0.0145	2		0.6215	0.0165	2			8.75		0.7305	0.0325	2		0.6475	0.0055	2		0.7555	0.0135	2		0.64	0.022	2		0.639
8.767		0.82	0.01	2		0.579	0.132	2		0.709	0.01	2		0.741	0.017	2		0.307	0.079	2		0.1895	0.0145	2		0.62	0.016	2			8.767		0.7295	0.0345	2		0.6455	0.0025	2		0.7535	0.0115	2		0.637	0.023	2		0.6405
8.783		0.8195	0.0125	2		0.5805	0.1325	2		0.7085	0.0085	2		0.7395	0.0165	2		0.3065	0.0805	2		0.1895	0.0145	2		0.6175	0.0155	2			8.783		0.7285	0.0325	2		0.6455	0.0035	2		0.7545	0.0115	2		0.6375	0.0235	2		0.6415
8.8		0.8185	0.0095	2		0.5765	0.1335	2		0.707	0.012	2		0.7405	0.0165	2		0.303	0.078	2		0.188	0.014	2		0.6215	0.0175	2			8.8		0.7265	0.0295	2		0.6445	0.0045	2		0.7575	0.0115	2		0.6405	0.0245	2		0.6415
8.817		0.817	0.011	2		0.5775	0.1315	2		0.7085	0.0115	2		0.738	0.017	2		0.304	0.08	2		0.187	0.013	2		0.6215	0.0175	2			8.817		0.7265	0.0355	2		0.642	0.002	2		0.7565	0.0115	2		0.64	0.026	2		0.641
8.833		0.8195	0.0115	2		0.576	0.133	2		0.707	0.013	2		0.7385	0.0175	2		0.3025	0.0785	2		0.1865	0.0125	2		0.621	0.016	2			8.833		0.7305	0.0305	2		0.6415	0.0035	2		0.7545	0.0115	2		0.6415	0.0255	2		0.638
8.85		0.82	0.011	2		0.576	0.134	2		0.706	0.014	2		0.74	0.016	2		0.3015	0.0775	2		0.186	0.012	2		0.6205	0.0165	2			8.85		0.729	0.034	2		0.6465	0.0015	2		0.753	0.01	2		0.641	0.027	2		0.6415
8.867		0.8195	0.0125	2		0.575	0.133	2		0.7065	0.0125	2		0.738	0.016	2		0.3	0.079	2		0.1845	0.0115	2		0.622	0.018	2			8.867		0.731	0.033	2		0.6425	0.0005	2		0.7555	0.0115	2		0.638	0.024	2		0.641
8.883		0.819	0.01	2		0.5765	0.1355	2		0.707	0.014	2		0.7385	0.0165	2		0.301	0.078	2		0.1835	0.0115	2		0.6185	0.0175	2			8.883		0.73	0.035	2		0.6445	0.0055	2		0.7505	0.0105	2		0.6385	0.0255	2		0.639
8.9		0.819	0.011	2		0.575	0.134	2		0.7065	0.0135	2		0.7375	0.0165	2		0.3015	0.0775	2		0.183	0.011	2		0.6185	0.0185	2			8.9		0.728	0.03	2		0.648	0.005	2		0.751	0.011	2		0.641	0.028	2		0.643
8.917		0.818	0.011	2		0.574	0.135	2		0.7065	0.0115	2		0.735	0.017	2		0.2995	0.0775	2		0.182	0.01	2		0.618	0.019	2			8.917		0.7335	0.0315	2		0.646	0.006	2		0.7545	0.0125	2		0.643	0.029	2		0.6385
8.933		0.8195	0.0115	2		0.5745	0.1335	2		0.7055	0.0115	2		0.7385	0.0165	2		0.3	0.079	2		0.181	0.01	2		0.617	0.018	2			8.933		0.732	0.03	2		0.6455	0.0045	2		0.7555	0.0115	2		0.6395	0.0255	2		0.6395
8.95		0.819	0.01	2		0.576	0.134	2		0.7065	0.0125	2		0.739	0.017	2		0.3005	0.0795	2		0.18	0.01	2		0.6185	0.0175	2			8.95		0.7285	0.0295	2		0.644	0.007	2		0.755	0.01	2		0.6365	0.0225	2		0.6425
8.967		0.8165	0.0095	2		0.573	0.133	2		0.7035	0.0125	2		0.7365	0.0175	2		0.299	0.079	2		0.1785	0.0095	2		0.6185	0.0185	2			8.967		0.7325	0.0315	2		0.642	0.002	2		0.757	0.012	2		0.6365	0.0215	2		0.6405
8.983		0.8165	0.0095	2		0.5735	0.1345	2		0.706	0.012	2		0.7355	0.0175	2		0.2975	0.0785	2		0.1775	0.0085	2		0.6185	0.0175	2			8.983		0.729	0.033	2		0.645	0.004	2		0.755	0.012	2		0.638	0.025	2		0.6405
9		0.8155	0.0095	2		0.5725	0.1355	2		0.7065	0.0115	2		0.7335	0.0175	2		0.2965	0.0775	2		0.177	0.007	2		0.618	0.016	2			9		0.732	0.035	2		0.645	0.001	2		0.755	0.01	2		0.6385	0.0255	2		0.6405
9.017		0.816	0.01	2		0.574	0.135	2		0.7065	0.0125	2		0.7355	0.0165	2		0.2975	0.0795	2		0.1755	0.0075	2		0.6155	0.0145	2			9.017		0.7305	0.0315	2		0.646	0.004	2		0.7545	0.0105	2		0.6425	0.0285	2		0.6415
9.033		0.8165	0.0095	2		0.5725	0.1345	2		0.703	0.012	2		0.733	0.018	2		0.297	0.079	2		0.1755	0.0065	2		0.616	0.016	2			9.033		0.729	0.033	2		0.6435	0.0055	2		0.752	0.011	2		0.64	0.028	2		0.6425
9.05		0.817	0.01	2		0.571	0.136	2		0.706	0.011	2		0.7345	0.0165	2		0.295	0.077	2		0.1735	0.0065	2		0.617	0.017	2			9.05		0.73	0.033	2		0.6425	0.0025	2		0.755	0.009	2		0.6355	0.0225	2		0.6395
9.067		0.817	0.012	2		0.574	0.134	2		0.7025	0.0125	2		0.734	0.016	2		0.2965	0.0805	2		0.1735	0.0065	2		0.615	0.018	2			9.067		0.7295	0.0315	2		0.645	0.005	2		0.754	0.014	2		0.6365	0.0245	2		0.6395
9.083		0.815	0.01	2		0.5695	0.1355	2		0.7005	0.0135	2		0.7315	0.0175	2		0.2935	0.0775	2		0.172	0.006	2		0.6155	0.0175	2			9.083		0.7285	0.0305	2		0.641	0.002	2		0.752	0.012	2		0.6405	0.0305	2		0.6375
9.1		0.8145	0.0085	2		0.5715	0.1355	2		0.703	0.013	2		0.73	0.017	2		0.295	0.079	2		0.171	0.006	2		0.614	0.016	2			9.1		0.7275	0.0355	2		0.6425	0.0035	2		0.753	0.012	2		0.639	0.028	2		0.6435
9.117		0.8175	0.0105	2		0.571	0.133	2		0.702	0.012	2		0.7325	0.0165	2		0.296	0.079	2		0.171	0.005	2		0.614	0.017	2			9.117		0.7275	0.0285	2		0.642	0.005	2		0.7555	0.0125	2		0.6375	0.0265	2		0.642
9.133		0.8175	0.0125	2		0.5705	0.1355	2		0.7025	0.0135	2		0.7305	0.0165	2		0.2935	0.0785	2		0.1705	0.0045	2		0.6145	0.0175	2			9.133		0.73	0.031	2		0.6415	0.0035	2		0.754	0.01	2		0.639	0.027	2		0.6425
9.15		0.8185	0.0105	2		0.571	0.136	2		0.7005	0.0145	2		0.7355	0.0165	2		0.2935	0.0785	2		0.1695	0.0045	2		0.615	0.016	2			9.15		0.7285	0.0345	2		0.6445	0.0045	2		0.7535	0.0125	2		0.6375	0.0255	2		0.6395
9.167		0.815	0.012	2		0.5695	0.1365	2		0.7015	0.0125	2		0.7305	0.0165	2		0.2915	0.0775	2		0.168	0.004	2		0.6145	0.0175	2			9.167		0.728	0.036	2		0.645	0.007	2		0.755	0.011	2		0.635	0.024	2		0.6405
9.183		0.816	0.011	2		0.571	0.135	2		0.7005	0.0105	2		0.7335	0.0165	2		0.293	0.08	2		0.1675	0.0045	2		0.6125	0.0195	2			9.183		0.729	0.032	2		0.643	0.004	2		0.756	0.011	2		0.639	0.029	2		0.641
9.2		0.8165	0.0105	2		0.5705	0.1345	2		0.6995	0.0105	2		0.733	0.017	2		0.2935	0.0805	2		0.1665	0.0035	2		0.6105	0.0165	2			9.2		0.729	0.032	2		0.6465	0.0035	2		0.7535	0.0115	2		0.6335	0.0235	2		0.64
9.217		0.8145	0.0105	2		0.57	0.134	2		0.7005	0.0105	2		0.731	0.017	2		0.293	0.08	2		0.166	0.003	2		0.611	0.018	2			9.217		0.7305	0.0335	2		0.6415	0.0035	2		0.7545	0.0115	2		0.638	0.029	2		0.6445
9.233		0.8155	0.0095	2		0.569	0.136	2		0.6975	0.0105	2		0.7315	0.0165	2		0.2915	0.0785	2		0.1655	0.0015	2		0.6105	0.0165	2			9.233		0.7295	0.0315	2		0.6425	0.0035	2		0.75	0.011	2		0.636	0.026	2		0.6395
9.25		0.8155	0.0105	2		0.568	0.135	2		0.7	0.012	2		0.73	0.017	2		0.2915	0.0785	2		0.164	0.002	2		0.6115	0.0155	2			9.25		0.7285	0.0305	2		0.6405	0.0045	2		0.7535	0.0115	2		0.6365	0.0275	2		0.6375
9.267		0.815	0.012	2		0.5655	0.1345	2		0.7015	0.0115	2		0.7315	0.0165	2		0.2895	0.0775	2		0.1635	0.0015	2		0.6095	0.0175	2			9.267		0.726	0.034	2		0.6415	0.0035	2		0.752	0.011	2		0.6385	0.0295	2		0.639
9.283		0.8155	0.0095	2		0.569	0.136	2		0.7	0.01	2		0.7275	0.0175	2		0.291	0.079	2		0.163	0.001	2		0.6115	0.0185	2			9.283		0.7315	0.0295	2		0.6395	0.0025	2		0.7505	0.0105	2		0.637	0.026	2		0.6395
9.3		0.8135	0.0095	2		0.567	0.137	2		0.6995	0.0115	2		0.73	0.017	2		0.289	0.078	2		0.162	0	2		0.6085	0.0185	2			9.3		0.727	0.03	2		0.643	0.005	2		0.7515	0.0115	2		0.637	0.028	2		0.642
9.317		0.8135	0.0125	2		0.567	0.136	2		0.698	0.012	2		0.729	0.018	2		0.2895	0.0785	2		0.16	0	2		0.611	0.02	2			9.317		0.7285	0.0275	2		0.641	0	2		0.749	0.011	2		0.639	0.03	2		0.6415
9.333		0.8165	0.0115	2		0.565	0.135	2		0.6985	0.0115	2		0.73	0.017	2		0.288	0.078	2		0.16	0	2		0.611	0.019	2			9.333		0.728	0.035	2		0.6405	0.0055	2		0.75	0.011	2		0.634	0.026	2		0.6395
9.35		0.8155	0.0115	2		0.5685	0.1355	2		0.697	0.013	2		0.7275	0.0165	2		0.289	0.08	2		0.1595	0.0005	2		0.609	0.018	2			9.35		0.73	0.032	2		0.6435	0.0075	2		0.752	0.011	2		0.635	0.026	2		0.642
9.367		0.814	0.012	2		0.567	0.135	2		0.6975	0.0125	2		0.726	0.018	2		0.289	0.08	2		0.159	0.001	2		0.61	0.018	2			9.367		0.729	0.034	2		0.644	0.007	2		0.752	0.011	2		0.637	0.029	2		0.641
9.383		0.815	0.01	2		0.567	0.137	2		0.6975	0.0095	2		0.729	0.016	2		0.2885	0.0785	2		0.158	0.001	2		0.6095	0.0165	2			9.383		0.731	0.03	2		0.641	0.003	2		0.754	0.011	2		0.6385	0.0295	2		0.64
9.4		0.8155	0.0125	2		0.5655	0.1365	2		0.6975	0.0145	2		0.7285	0.0165	2		0.2875	0.0785	2		0.157	0.001	2		0.607	0.018	2			9.4		0.7255	0.0325	2		0.644	0.005	2		0.7515	0.0115	2		0.639	0.028	2		0.639
9.417		0.8145	0.0105	2		0.565	0.139	2		0.696	0.013	2		0.7255	0.0185	2		0.2855	0.0775	2		0.1565	0.0015	2		0.608	0.019	2			9.417		0.7245	0.0325	2		0.6435	0.0055	2		0.755	0.011	2		0.636	0.029	2		0.641
9.433		0.814	0.012	2		0.564	0.137	2		0.698	0.011	2		0.7265	0.0175	2		0.285	0.078	2		0.1565	0.0015	2		0.606	0.02	2			9.433		0.727	0.033	2		0.641	0.003	2		0.752	0.011	2		0.631	0.022	2		0.641
9.45		0.8135	0.0105	2		0.5675	0.1385	2		0.694	0.011	2		0.724	0.018	2		0.2865	0.0795	2		0.155	0.002	2		0.6045	0.0185	2			9.45		0.7265	0.0335	2		0.6365	0.0035	2		0.7485	0.0125	2		0.636	0.027	2		0.6405
9.467		0.8135	0.0135	2		0.5665	0.1365	2		0.694	0.011	2		0.7245	0.0175	2		0.286	0.08	2		0.1545	0.0025	2		0.6045	0.0175	2			9.467		0.7295	0.0305	2		0.642	0.002	2		0.7455	0.0115	2		0.637	0.028	2		0.639
9.483		0.814	0.012	2		0.5635	0.1375	2		0.695	0.011	2		0.7255	0.0175	2		0.284	0.078	2		0.153	0.003	2		0.6055	0.0175	2			9.483		0.726	0.032	2		0.6395	0.0035	2		0.748	0.011	2		0.6355	0.0265	2		0.6355
9.5		0.8145	0.0135	2		0.561	0.138	2		0.695	0.012	2		0.7265	0.0165	2		0.2825	0.0765	2		0.1535	0.0035	2		0.606	0.017	2			9.5		0.729	0.03	2		0.642	0.004	2		0.749	0.012	2		0.6365	0.0275	2		0.6395
9.517		0.8145	0.0125	2		0.562	0.137	2		0.693	0.013	2		0.726	0.017	2		0.283	0.078	2		0.1525	0.0035	2		0.604	0.018	2			9.517		0.7305	0.0285	2		0.6415	0.0065	2		0.7505	0.0115	2		0.6375	0.0285	2		0.639
9.533		0.8145	0.0135	2		0.564	0.137	2		0.6945	0.0115	2		0.726	0.017	2		0.284	0.08	2		0.1515	0.0035	2		0.604	0.018	2			9.533		0.7305	0.0305	2		0.6425	0.0065	2		0.75	0.012	2		0.636	0.029	2		0.641
9.55		0.8145	0.0125	2		0.5625	0.1355	2		0.6935	0.0105	2		0.726	0.017	2		0.2835	0.0795	2		0.151	0.004	2		0.604	0.019	2			9.55		0.7255	0.0305	2		0.6385	0.0015	2		0.7515	0.0115	2		0.6365	0.0285	2		0.6385
9.567		0.815	0.011	2		0.561	0.135	2		0.694	0.011	2		0.725	0.017	2		0.283	0.079	2		0.15	0.004	2		0.6035	0.0165	2			9.567		0.7265	0.0335	2		0.6425	0.0055	2		0.752	0.011	2		0.633	0.024	2		0.6385
9.583		0.814	0.013	2		0.561	0.137	2		0.695	0.013	2		0.7245	0.0175	2		0.2815	0.0785	2		0.15	0.004	2		0.6035	0.0195	2			9.583		0.727	0.034	2		0.638	0.001	2		0.753	0.011	2		0.6345	0.0275	2		0.6355
9.6		0.8125	0.0125	2		0.5615	0.1355	2		0.693	0.011	2		0.7255	0.0165	2		0.2825	0.0795	2		0.149	0.005	2		0.604	0.017	2			9.6		0.727	0.031	2		0.638	0.004	2		0.7495	0.0115	2		0.6365	0.0295	2		0.64
9.617		0.813	0.011	2		0.5605	0.1375	2		0.692	0.011	2		0.7255	0.0165	2		0.281	0.078	2		0.1485	0.0055	2		0.6035	0.0175	2			9.617		0.7265	0.0315	2		0.6405	0.0025	2		0.7485	0.0115	2		0.637	0.028	2		0.642
9.633		0.813	0.012	2		0.56	0.136	2		0.693	0.012	2		0.7235	0.0165	2		0.2815	0.0785	2		0.148	0.006	2		0.6025	0.0175	2			9.633		0.7275	0.0325	2		0.636	0.004	2		0.748	0.011	2		0.636	0.03	2		0.6365
9.65		0.8135	0.0115	2		0.561	0.136	2		0.693	0.013	2		0.7225	0.0175	2		0.281	0.08	2		0.1465	0.0055	2		0.6015	0.0195	2			9.65		0.73	0.029	2		0.6405	0.0035	2		0.7505	0.0115	2		0.635	0.028	2		0.6375
9.667		0.813	0.013	2		0.56	0.136	2		0.6915	0.0125	2		0.7245	0.0165	2		0.2805	0.0795	2		0.1465	0.0065	2		0.6	0.019	2			9.667		0.7285	0.0325	2		0.639	0.006	2		0.75	0.011	2		0.6365	0.0325	2		0.639
9.683		0.814	0.01	2		0.5585	0.1355	2		0.6925	0.0115	2		0.7235	0.0155	2		0.28	0.079	2		0.146	0.006	2		0.6025	0.0195	2			9.683		0.7235	0.0295	2		0.6385	0.0065	2		0.75	0.012	2		0.637	0.03	2		0.636
9.7		0.813	0.012	2		0.559	0.137	2		0.6935	0.0115	2		0.7225	0.0165	2		0.279	0.079	2		0.145	0.006	2		0.6005	0.0185	2			9.7		0.724	0.03	2		0.6425	0.0045	2		0.7485	0.0125	2		0.637	0.032	2		0.637
9.717		0.811	0.011	2		0.56	0.135	2		0.69	0.012	2		0.722	0.016	2		0.281	0.081	2		0.1445	0.0075	2		0.6015	0.0175	2			9.717		0.7285	0.0305	2		0.642	0.007	2		0.748	0.012	2		0.6375	0.0325	2		0.638
9.733		0.812	0.012	2		0.557	0.137	2		0.6905	0.0115	2		0.7215	0.0165	2		0.2775	0.0775	2		0.144	0.007	2		0.601	0.019	2			9.733		0.727	0.032	2		0.6395	0.0045	2		0.753	0.012	2		0.633	0.03	2		0.6355
9.75		0.813	0.013	2		0.561	0.135	2		0.6895	0.0105	2		0.719	0.017	2		0.281	0.082	2		0.144	0.007	2		0.601	0.018	2			9.75		0.7275	0.0305	2		0.6405	0.0055	2		0.7465	0.0125	2		0.636	0.03	2		0.6385
9.767		0.81	0.012	2		0.557	0.136	2		0.6895	0.0095	2		0.7205	0.0165	2		0.278	0.079	2		0.1425	0.0075	2		0.6	0.018	2			9.767		0.7275	0.0325	2		0.6395	0.0045	2		0.7485	0.0115	2		0.6405	0.0345	2		0.637
9.783		0.809	0.014	2		0.557	0.135	2		0.6895	0.0105	2		0.719	0.017	2		0.2785	0.0795	2		0.142	0.007	2		0.5995	0.0175	2			9.783		0.7265	0.0325	2		0.64	0.004	2		0.749	0.011	2		0.633	0.03	2		0.6395
9.8		0.8085	0.0155	2		0.557	0.136	2		0.689	0.012	2		0.72	0.017	2		0.278	0.079	2		0.142	0.008	2		0.598	0.018	2			9.8		0.7245	0.0345	2		0.6405	0.0055	2		0.7455	0.0155	2		0.6355	0.0295	2		0.635
9.817		0.8115	0.0125	2		0.5545	0.1365	2		0.6875	0.0105	2		0.721	0.016	2		0.276	0.077	2		0.141	0.008	2		0.599	0.018	2			9.817		0.7255	0.0305	2		0.638	0.004	2		0.744	0.01	2		0.6305	0.0245	2		0.6375
9.833		0.811	0.011	2		0.5515	0.1375	2		0.688	0.012	2		0.7205	0.0155	2		0.274	0.075	2		0.14	0.008	2		0.599	0.018	2			9.833		0.727	0.032	2		0.642	0.006	2		0.748	0.011	2		0.6335	0.0265	2		0.635
9.85		0.808	0.012	2		0.551	0.138	2		0.6875	0.0115	2		0.72	0.016	2		0.2735	0.0745	2		0.14	0.008	2		0.597	0.02	2			9.85		0.7245	0.0345	2		0.637	0.002	2		0.749	0.012	2		0.6335	0.0295	2		0.6375
9.867		0.809	0.01	2		0.5505	0.1385	2		0.688	0.011	2		0.719	0.016	2		0.273	0.074	2		0.14	0.009	2		0.5985	0.0195	2			9.867		0.7265	0.0325	2		0.6405	0.0045	2		0.748	0.011	2		0.6325	0.0275	2		0.637
9.883		0.8115	0.0115	2		0.553	0.137	2		0.688	0.011	2		0.7185	0.0165	2		0.274	0.077	2		0.139	0.009	2		0.597	0.019	2			9.883		0.725	0.031	2		0.6385	0.0055	2		0.7495	0.0115	2		0.633	0.029	2		0.6355
9.9		0.8085	0.0105	2		0.551	0.139	2		0.6865	0.0125	2		0.7205	0.0165	2		0.2715	0.0745	2		0.1385	0.0095	2		0.5965	0.0185	2			9.9		0.725	0.03	2		0.6375	0.0015	2		0.752	0.009	2		0.6405	0.0355	2		0.6315
9.917		0.809	0.012	2		0.552	0.138	2		0.6865	0.0125	2		0.7185	0.0165	2		0.273	0.076	2		0.1385	0.0095	2		0.5975	0.0185	2			9.917		0.727	0.03	2		0.64	0.004	2		0.7505	0.0115	2		0.6325	0.0275	2		0.6375
9.933		0.809	0.012	2		0.5505	0.1365	2		0.687	0.011	2		0.7175	0.0165	2		0.273	0.076	2		0.137	0.009	2		0.5955	0.0165	2			9.933		0.7255	0.0325	2		0.6405	0.0025	2		0.7505	0.0125	2		0.632	0.028	2		0.636
9.95		0.8095	0.0095	2		0.554	0.138	2		0.6885	0.0115	2		0.7185	0.0165	2		0.2735	0.0775	2		0.1365	0.0095	2		0.596	0.018	2			9.95		0.7245	0.0315	2		0.6395	0.0045	2		0.7505	0.0115	2		0.6355	0.0315	2		0.634
9.967		0.809	0.012	2		0.55	0.138	2		0.6865	0.0115	2		0.7175	0.0165	2		0.2715	0.0755	2		0.137	0.01	2		0.594	0.018	2			9.967		0.725	0.032	2		0.638	0.004	2		0.75	0.012	2		0.6335	0.0315	2		0.6365
9.983		0.808	0.009	2		0.551	0.139	2		0.687	0.01	2		0.7165	0.0165	2		0.2705	0.0765	2		0.136	0.01	2		0.594	0.018	2			9.983		0.7215	0.0325	2		0.637	0.004	2		0.7525	0.0125	2		0.6345	0.0305	2		0.637
10		0.807	0.01	2		0.5525	0.1385	2		0.6845	0.0095	2		0.7165	0.0165	2		0.272	0.077	2		0.1345	0.0105	2		0.593	0.019	2			10		0.724	0.032	2		0.639	0.005	2		0.752	0.01	2		0.635	0.031	2		0.6335
10.017		0.8105	0.0125	2		0.5495	0.1395	2		0.6855	0.0125	2		0.7165	0.0175	2		0.2695	0.0755	2		0.135	0.011	2		0.5945	0.0195	2			10.017		0.724	0.033	2		0.637	0.004	2		0.7515	0.0115	2		0.632	0.029	2		0.632
10.033		0.807	0.011	2		0.55	0.141	2		0.6845	0.0125	2		0.7145	0.0175	2		0.2685	0.0745	2		0.134	0.01	2		0.5945	0.0175	2			10.033		0.725	0.032	2		0.6395	0.0065	2		0.7515	0.0125	2		0.6335	0.0295	2		0.635
10.05		0.8095	0.0115	2		0.55	0.142	2		0.6845	0.0105	2		0.714	0.017	2		0.268	0.074	2		0.1335	0.0105	2		0.596	0.018	2			10.05		0.7245	0.0305	2		0.6375	0.0055	2		0.747	0.012	2		0.6325	0.0275	2		0.6325
10.067		0.808	0.013	2		0.55	0.139	2		0.685	0.012	2		0.7165	0.0165	2		0.269	0.076	2		0.133	0.011	2		0.5935	0.0185	2			10.067		0.723	0.029	2		0.638	0.002	2		0.749	0.012	2		0.634	0.031	2		0.6315
10.083		0.809	0.013	2		0.5505	0.1415	2		0.6835	0.0115	2		0.715	0.016	2		0.268	0.075	2		0.1325	0.0115	2		0.593	0.019	2			10.083		0.7245	0.0315	2		0.637	0.001	2		0.7455	0.0115	2		0.6285	0.0255	2		0.6325
10.1		0.807	0.01	2		0.546	0.142	2		0.6845	0.0105	2		0.716	0.016	2		0.265	0.072	2		0.132	0.012	2		0.5945	0.0175	2			10.1		0.722	0.031	2		0.6385	0.0045	2		0.751	0.012	2		0.6325	0.0285	2		0.635
10.117		0.8075	0.0105	2		0.5495	0.1425	2		0.683	0.012	2		0.7155	0.0165	2		0.2665	0.0745	2		0.132	0.011	2		0.5925	0.0185	2			10.117		0.723	0.031	2		0.6385	0.0055	2		0.7475	0.0115	2		0.6335	0.0315	2		0.6335
10.133		0.807	0.01	2		0.547	0.142	2		0.684	0.012	2		0.7135	0.0165	2		0.2655	0.0735	2		0.132	0.012	2		0.593	0.019	2			10.133		0.7235	0.0305	2		0.638	0.003	2		0.744	0.009	2		0.6345	0.0325	2		0.6345
10.15		0.8075	0.0125	2		0.5465	0.1405	2		0.6815	0.0095	2		0.7135	0.0175	2		0.266	0.074	2		0.131	0.012	2		0.5925	0.0175	2			10.15		0.7245	0.0345	2		0.638	0.005	2		0.7475	0.0115	2		0.6315	0.0295	2		0.631
10.167		0.8055	0.0105	2		0.5475	0.1405	2		0.6815	0.0105	2		0.7135	0.0165	2		0.2655	0.0755	2		0.13	0.012	2		0.592	0.019	2			10.167		0.7255	0.0335	2		0.6355	0.0015	2		0.7475	0.0095	2		0.6255	0.0235	2		0.6335
10.183		0.804	0.013	2		0.549	0.141	2		0.6825	0.0095	2		0.7135	0.0175	2		0.2665	0.0755	2		0.1295	0.0125	2		0.5905	0.0185	2			10.183		0.7215	0.0345	2		0.638	0.001	2		0.7465	0.0105	2		0.6325	0.0325	2		0.635
10.2		0.8085	0.0105	2		0.548	0.14	2		0.681	0.01	2		0.714	0.016	2		0.2665	0.0755	2		0.1295	0.0125	2		0.589	0.018	2			10.2		0.7235	0.0285	2		0.6365	0.0025	2		0.749	0.012	2		0.6335	0.0325	2		0.6325
10.217		0.807	0.012	2		0.548	0.14	2		0.681	0.012	2		0.7135	0.0165	2		0.2665	0.0755	2		0.129	0.013	2		0.5895	0.0175	2			10.217		0.725	0.033	2		0.637	0.006	2		0.7485	0.0115	2		0.631	0.027	2		0.6315
10.233		0.806	0.012	2		0.5455	0.1395	2		0.68	0.014	2		0.7115	0.0165	2		0.265	0.075	2		0.129	0.013	2		0.5905	0.0195	2			10.233		0.7215	0.0325	2		0.6335	0.0015	2		0.75	0.013	2		0.636	0.032	2		0.634
10.25		0.806	0.01	2		0.5465	0.1395	2		0.6795	0.0115	2		0.712	0.016	2		0.265	0.076	2		0.1285	0.0135	2		0.5905	0.0175	2			10.25		0.725	0.031	2		0.636	0.002	2		0.7495	0.0125	2		0.6305	0.0285	2		0.632
10.267		0.8065	0.0105	2		0.546	0.14	2		0.6805	0.0095	2		0.711	0.016	2		0.2645	0.0755	2		0.128	0.013	2		0.59	0.019	2			10.267		0.7235	0.0335	2		0.6365	0.0005	2		0.752	0.011	2		0.635	0.032	2		0.6315
10.283		0.8085	0.0135	2		0.548	0.138	2		0.678	0.01	2		0.7105	0.0175	2		0.267	0.077	2		0.1275	0.0135	2		0.5895	0.0195	2			10.283		0.723	0.031	2		0.6335	0.0005	2		0.7455	0.0095	2		0.6365	0.0345	2		0.6315
10.3		0.8075	0.0105	2		0.5465	0.1395	2		0.679	0.011	2		0.7115	0.0175	2		0.265	0.076	2		0.1265	0.0135	2		0.588	0.018	2			10.3		0.723	0.031	2		0.6355	0.0025	2		0.7495	0.0115	2		0.6325	0.0235	2		0.6345
10.317		0.808	0.011	2		0.5475	0.1385	2		0.679	0.012	2		0.7095	0.0175	2		0.2655	0.0775	2		0.127	0.014	2		0.5885	0.0175	2			10.317		0.723	0.031	2		0.638	0.004	2		0.7505	0.0115	2		0.6345	0.0325	2		0.631
10.333		0.808	0.011	2		0.548	0.14	2		0.6795	0.0125	2		0.7115	0.0165	2		0.2655	0.0775	2		0.126	0.014	2		0.589	0.019	2			10.333		0.7245	0.0305	2		0.638	0.005	2		0.7455	0.0115	2		0.636	0.035	2		0.6325
10.35		0.807	0.011	2		0.5455	0.1395	2		0.68	0.011	2		0.7095	0.0165	2		0.263	0.077	2		0.1245	0.0145	2		0.5885	0.0185	2			10.35		0.7235	0.0305	2		0.6375	0.0025	2		0.7475	0.0115	2		0.6275	0.0265	2		0.632
10.367		0.8045	0.0105	2		0.5495	0.1395	2		0.678	0.013	2		0.708	0.017	2		0.266	0.079	2		0.125	0.014	2		0.588	0.019	2			10.367		0.7225	0.0295	2		0.6405	0.0055	2		0.747	0.012	2		0.633	0.03	2		0.631
10.383		0.8055	0.0135	2		0.547	0.14	2		0.677	0.013	2		0.7095	0.0165	2		0.264	0.077	2		0.125	0.014	2		0.587	0.018	2			10.383		0.722	0.031	2		0.6355	0.0025	2		0.749	0.011	2		0.631	0.031	2		0.629
10.4		0.806	0.012	2		0.5485	0.1415	2		0.6785	0.0115	2		0.709	0.016	2		0.2635	0.0775	2		0.124	0.015	2		0.5865	0.0165	2			10.4		0.7235	0.0325	2		0.64	0.008	2		0.746	0.011	2		0.6345	0.0325	2		0.6315
10.417		0.807	0.013	2		0.546	0.139	2		0.6785	0.0115	2		0.71	0.018	2		0.2635	0.0775	2		0.124	0.014	2		0.5865	0.0195	2			10.417		0.723	0.033	2		0.637	0.007	2		0.747	0.012	2		0.627	0.026	2		0.63
10.433		0.8055	0.0105	2		0.5475	0.1385	2		0.6765	0.0105	2		0.708	0.017	2		0.2645	0.0785	2		0.123	0.015	2		0.5835	0.0195	2			10.433		0.7225	0.0305	2		0.6365	0.0055	2		0.75	0.01	2		0.6325	0.0325	2		0.632
10.45		0.8045	0.0125	2		0.545	0.139	2		0.677	0.012	2		0.709	0.017	2		0.263	0.077	2		0.1225	0.0145	2		0.5855	0.0185	2			10.45		0.723	0.032	2		0.633	0.003	2		0.75	0.012	2		0.632	0.03	2		0.6325
10.467		0.804	0.014	2		0.543	0.14	2		0.675	0.011	2		0.707	0.016	2		0.2615	0.0755	2		0.1225	0.0155	2		0.5855	0.0185	2			10.467		0.7215	0.0295	2		0.6335	0.0035	2		0.7485	0.0125	2		0.63	0.031	2		0.6305
10.483		0.8045	0.0135	2		0.5465	0.1395	2		0.676	0.012	2		0.711	0.016	2		0.263	0.078	2		0.122	0.015	2		0.5855	0.0195	2			10.483		0.7205	0.0285	2		0.633	0.003	2		0.7475	0.0115	2		0.632	0.03	2		0.6305
10.5		0.8055	0.0135	2		0.544	0.14	2		0.6755	0.0105	2		0.7065	0.0185	2		0.2615	0.0765	2		0.1215	0.0155	2		0.584	0.018	2			10.5		0.722	0.031	2		0.637	0.006	2		0.7465	0.0115	2		0.6275	0.0275	2		0.631
10.517		0.8035	0.0125	2		0.546	0.139	2		0.6765	0.0115	2		0.707	0.017	2		0.263	0.078	2		0.1215	0.0155	2		0.5825	0.0195	2			10.517		0.7215	0.0325	2		0.637	0.004	2		0.7485	0.0115	2		0.634	0.034	2		0.6315
10.533		0.804	0.016	2		0.546	0.139	2		0.676	0.01	2		0.706	0.016	2		0.2625	0.0785	2		0.121	0.015	2		0.5835	0.0195	2			10.533		0.7225	0.0315	2		0.638	0.005	2		0.7505	0.0115	2		0.6345	0.0345	2		0.632
10.55		0.805	0.013	2		0.5455	0.1405	2		0.673	0.012	2		0.7065	0.0165	2		0.261	0.078	2		0.1205	0.0155	2		0.582	0.019	2			10.55		0.7235	0.0295	2		0.6335	0.0005	2		0.7475	0.0075	2		0.6325	0.0325	2		0.6295
10.567		0.8045	0.0125	2		0.5455	0.1395	2		0.6725	0.0105	2		0.705	0.016	2		0.2615	0.0785	2		0.12	0.015	2		0.582	0.019	2			10.567		0.722	0.033	2		0.636	0.007	2		0.746	0.014	2		0.6315	0.0305	2		0.6285
10.583		0.804	0.012	2		0.5455	0.1395	2		0.6735	0.0125	2		0.7055	0.0165	2		0.262	0.078	2		0.1205	0.0155	2		0.5825	0.0195	2			10.583		0.721	0.033	2		0.635	0.005	2		0.749	0.012	2		0.632	0.033	2		0.63
10.6		0.8045	0.0115	2		0.543	0.14	2		0.6745	0.0105	2		0.707	0.016	2		0.2595	0.0765	2		0.1195	0.0155	2		0.5805	0.0185	2			10.6		0.7215	0.0345	2		0.636	0.005	2		0.746	0.013	2		0.6315	0.0335	2		0.629
10.617		0.802	0.013	2		0.5425	0.1385	2		0.6755	0.0105	2		0.703	0.017	2		0.2605	0.0775	2		0.119	0.016	2		0.58	0.019	2			10.617		0.723	0.032	2		0.638	0.005	2		0.747	0.01	2		0.6345	0.0365	2		0.6315
10.633		0.8035	0.0105	2		0.542	0.139	2		0.674	0.011	2		0.7055	0.0165	2		0.2595	0.0775	2		0.119	0.016	2		0.5825	0.0205	2			10.633		0.7205	0.0315	2		0.6355	0.0065	2		0.7475	0.0105	2		0.6325	0.0315	2		0.631
10.65		0.804	0.01	2		0.543	0.14	2		0.6735	0.0095	2		0.706	0.016	2		0.2595	0.0775	2		0.118	0.017	2		0.5825	0.0185	2			10.65		0.7235	0.0335	2		0.6345	0.0025	2		0.75	0.01	2		0.6255	0.0265	2		0.6295
10.667		0.804	0.011	2		0.5435	0.1375	2		0.6715	0.0105	2		0.705	0.017	2		0.2605	0.0795	2		0.117	0.016	2		0.5825	0.0195	2			10.667		0.723	0.032	2		0.637	0.005	2		0.7505	0.0105	2		0.635	0.036	2		0.63
10.683		0.8065	0.0105	2		0.5435	0.1385	2		0.6725	0.0095	2		0.7055	0.0165	2		0.26	0.079	2		0.1175	0.0165	2		0.581	0.018	2			10.683		0.7225	0.0315	2		0.6345	0.0045	2		0.75	0.013	2		0.636	0.037	2		0.6295
10.7		0.805	0.013	2		0.5435	0.1405	2		0.671	0.011	2		0.7025	0.0175	2		0.2585	0.0785	2		0.1175	0.0165	2		0.582	0.019	2			10.7		0.7205	0.0325	2		0.633	0.002	2		0.748	0.012	2		0.628	0.028	2		0.629
10.717		0.804	0.012	2		0.5435	0.1395	2		0.672	0.01	2		0.704	0.017	2		0.259	0.079	2		0.1165	0.0165	2		0.5795	0.0195	2			10.717		0.7175	0.0325	2		0.633	0.004	2		0.7485	0.0115	2		0.626	0.026	2		0.627
10.733		0.805	0.013	2		0.543	0.14	2		0.672	0.009	2		0.7025	0.0165	2		0.2585	0.0785	2		0.1165	0.0175	2		0.5795	0.0175	2			10.733		0.7175	0.0345	2		0.634	0.005	2		0.743	0.012	2		0.6305	0.0325	2		0.6305
10.75		0.8025	0.0125	2		0.542	0.141	2		0.671	0.011	2		0.7025	0.0165	2		0.257	0.078	2		0.1155	0.0175	2		0.5785	0.0175	2			10.75		0.721	0.031	2		0.6335	0.0075	2		0.745	0.012	2		0.631	0.034	2		0.6295
10.767		0.8025	0.0135	2		0.5415	0.1405	2		0.671	0.01	2		0.703	0.017	2		0.257	0.078	2		0.115	0.017	2		0.578	0.018	2			10.767		0.718	0.03	2		0.632	0.004	2		0.7455	0.0125	2		0.6355	0.0375	2		0.628
10.783		0.804	0.012	2		0.54	0.142	2		0.6695	0.0115	2		0.7025	0.0165	2		0.255	0.076	2		0.115	0.017	2		0.5785	0.0185	2			10.783		0.7165	0.0305	2		0.634	0.009	2		0.744	0.011	2		0.6285	0.0315	2		0.628
10.8		0.803	0.013	2		0.542	0.138	2		0.6685	0.0105	2		0.702	0.016	2		0.2585	0.0795	2		0.115	0.017	2		0.578	0.02	2			10.8		0.717	0.032	2		0.636	0.006	2		0.746	0.012	2		0.63	0.032	2		0.6285
10.817		0.8025	0.0125	2		0.54	0.137	2		0.6695	0.0105	2		0.703	0.016	2		0.258	0.078	2		0.115	0.017	2		0.5755	0.0195	2			10.817		0.7185	0.0325	2		0.633	0.004	2		0.7505	0.0115	2		0.63	0.032	2		0.628
10.833		0.8025	0.0125	2		0.5375	0.1385	2		0.667	0.01	2		0.703	0.016	2		0.256	0.077	2		0.1145	0.0175	2		0.576	0.02	2			10.833		0.719	0.032	2		0.6355	0.0035	2		0.7445	0.0125	2		0.628	0.031	2		0.63
10.85		0.803	0.012	2		0.537	0.138	2		0.6685	0.0105	2		0.7015	0.0165	2		0.2555	0.0775	2		0.1145	0.0175	2		0.577	0.02	2			10.85		0.719	0.034	2		0.637	0.002	2		0.745	0.012	2		0.628	0.031	2		0.631
10.867		0.8015	0.0125	2		0.5375	0.1385	2		0.6675	0.0105	2		0.702	0.017	2		0.255	0.077	2		0.1135	0.0175	2		0.5745	0.0195	2			10.867		0.718	0.033	2		0.634	0.003	2		0.746	0.012	2		0.6315	0.0345	2		0.629
10.883		0.802	0.01	2		0.5385	0.1375	2		0.668	0.01	2		0.702	0.016	2		0.2565	0.0785	2		0.1135	0.0175	2		0.5765	0.0205	2			10.883		0.7205	0.0335	2		0.632	0	2		0.747	0.012	2		0.63	0.033	2		0.627
10.9		0.8025	0.0125	2		0.5375	0.1385	2		0.6675	0.0115	2		0.701	0.017	2		0.2545	0.0775	2		0.113	0.018	2		0.575	0.02	2			10.9		0.721	0.033	2		0.6355	0.0065	2		0.7475	0.0125	2		0.6305	0.0335	2		0.6275
10.917		0.802	0.013	2		0.537	0.139	2		0.668	0.009	2		0.7	0.017	2		0.254	0.077	2		0.113	0.018	2		0.575	0.02	2			10.917		0.723	0.035	2		0.634	0.006	2		0.7495	0.0115	2		0.627	0.03	2		0.628
10.933		0.8015	0.0115	2		0.5365	0.1385	2		0.6665	0.0115	2		0.7005	0.0175	2		0.253	0.078	2		0.113	0.018	2		0.5755	0.0195	2			10.933		0.724	0.034	2		0.637	0.004	2		0.747	0.011	2		0.6315	0.0345	2		0.629
10.95		0.8	0.013	2		0.537	0.139	2		0.6675	0.0105	2		0.6995	0.0165	2		0.254	0.077	2		0.1125	0.0185	2		0.575	0.021	2			10.95		0.7185	0.0345	2		0.6365	0.0035	2		0.746	0.012	2		0.6265	0.0295	2		0.6295
10.967		0.8015	0.0115	2		0.5365	0.1395	2		0.666	0.011	2		0.7	0.017	2		0.2525	0.0775	2		0.112	0.018	2		0.5745	0.0175	2			10.967		0.7195	0.0325	2		0.6315	0.0005	2		0.748	0.011	2		0.6255	0.0305	2		0.626
10.983		0.801	0.012	2		0.534	0.14	2		0.667	0.01	2		0.7005	0.0165	2		0.251	0.075	2		0.1115	0.0185	2		0.574	0.019	2			10.983		0.721	0.031	2		0.633	0.006	2		0.749	0.011	2		0.6325	0.0365	2		0.6265
11		0.802	0.013	2		0.5315	0.1405	2		0.6665	0.0085	2		0.699	0.017	2		0.2495	0.0745	2		0.1115	0.0185	2		0.574	0.017	2			11		0.719	0.034	2		0.631	0.004	2		0.7435	0.0115	2		0.6315	0.0355	2		0.627
11.017		0.803	0.012	2		0.5315	0.1415	2		0.665	0.007	2		0.6985	0.0165	2		0.249	0.074	2		0.111	0.018	2		0.575	0.018	2			11.017		0.7165	0.0315	2		0.6335	0.0055	2		0.7445	0.0105	2		0.6285	0.0325	2		0.627
11.033		0.8025	0.0125	2		0.532	0.142	2		0.6655	0.0095	2		0.6985	0.0165	2		0.249	0.073	2		0.1105	0.0185	2		0.575	0.018	2			11.033		0.7165	0.0345	2		0.635	0.004	2		0.7465	0.0105	2		0.6295	0.0345	2		0.626
11.05		0.8005	0.0115	2		0.5315	0.1415	2		0.6665	0.0095	2		0.6985	0.0165	2		0.248	0.074	2		0.11	0.018	2		0.5725	0.0175	2			11.05		0.719	0.032	2		0.6335	0.0055	2		0.747	0.013	2		0.629	0.033	2		0.6255
11.067		0.8005	0.0135	2		0.5315	0.1405	2		0.665	0.01	2		0.698	0.017	2		0.2485	0.0745	2		0.1095	0.0185	2		0.572	0.017	2			11.067		0.717	0.03	2		0.6345	0.0055	2		0.746	0.011	2		0.629	0.033	2		0.6285
11.083		0.802	0.012	2		0.5315	0.1425	2		0.665	0.011	2		0.696	0.017	2		0.2475	0.0735	2		0.11	0.019	2		0.5725	0.0175	2			11.083		0.7195	0.0365	2		0.632	0.004	2		0.7435	0.0145	2		0.6295	0.0345	2		0.6255
11.1		0.8015	0.0125	2		0.534	0.138	2		0.666	0.01	2		0.697	0.017	2		0.251	0.077	2		0.109	0.019	2		0.5725	0.0175	2			11.1		0.7175	0.0335	2		0.634	0.004	2		0.744	0.015	2		0.6275	0.0315	2		0.626
11.117		0.801	0.012	2		0.5325	0.1415	2		0.663	0.01	2		0.697	0.016	2		0.2485	0.0745	2		0.1085	0.0185	2		0.573	0.019	2			11.117		0.72	0.034	2		0.6325	0.0065	2		0.7435	0.0135	2		0.633	0.036	2		0.626
11.133		0.8	0.012	2		0.5275	0.1405	2		0.664	0.01	2		0.698	0.016	2		0.2465	0.0725	2		0.109	0.019	2		0.57	0.021	2			11.133		0.722	0.033	2		0.6315	0.0055	2		0.7465	0.0115	2		0.627	0.029	2		0.6275
11.15		0.801	0.012	2		0.531	0.139	2		0.664	0.01	2		0.6975	0.0165	2		0.2495	0.0755	2		0.109	0.019	2		0.571	0.019	2			11.15		0.7195	0.0345	2		0.631	0.006	2		0.746	0.011	2		0.6275	0.0335	2		0.626
11.167		0.8	0.012	2		0.5295	0.1415	2		0.663	0.01	2		0.6965	0.0155	2		0.247	0.073	2		0.1085	0.0195	2		0.5705	0.0185	2			11.167		0.7195	0.0325	2		0.6335	0.0035	2		0.749	0.011	2		0.628	0.034	2		0.629
11.183		0.7985	0.0125	2		0.529	0.141	2		0.663	0.012	2		0.6945	0.0165	2		0.2465	0.0735	2		0.108	0.019	2		0.57	0.02	2			11.183		0.718	0.035	2		0.6325	0.0065	2		0.7475	0.0115	2		0.628	0.032	2		0.6295
11.2		0.7975	0.0145	2		0.528	0.142	2		0.663	0.009	2		0.697	0.017	2		0.2455	0.0715	2		0.1075	0.0185	2		0.57	0.019	2			11.2		0.7195	0.0335	2		0.632	0	2		0.7455	0.0115	2		0.6305	0.0365	2		0.6265
11.217		0.797	0.013	2		0.527	0.142	2		0.663	0.009	2		0.696	0.017	2		0.245	0.072	2		0.1075	0.0195	2		0.569	0.022	2			11.217		0.72	0.036	2		0.635	0.006	2		0.747	0.011	2		0.6275	0.0315	2		0.622
11.233		0.7965	0.0145	2		0.5295	0.1415	2		0.66	0.011	2		0.696	0.016	2		0.246	0.074	2		0.1075	0.0195	2		0.5715	0.0195	2			11.233		0.7225	0.0345	2		0.6325	0.0035	2		0.745	0.012	2		0.6275	0.0315	2		0.625
11.25		0.8	0.016	2		0.5255	0.1425	2		0.6635	0.0085	2		0.6945	0.0165	2		0.243	0.072	2		0.1065	0.0195	2		0.5675	0.0195	2			11.25		0.72	0.033	2		0.6345	0.0055	2		0.746	0.012	2		0.6275	0.0335	2		0.623
11.267		0.798	0.014	2		0.5265	0.1415	2		0.662	0.008	2		0.6975	0.0165	2		0.244	0.073	2		0.1065	0.0185	2		0.567	0.02	2			11.267		0.7185	0.0335	2		0.6315	0.0035	2		0.7475	0.0115	2		0.625	0.032	2		0.625
11.283		0.799	0.013	2		0.527	0.141	2		0.6605	0.0085	2		0.6945	0.0165	2		0.2445	0.0725	2		0.106	0.02	2		0.568	0.021	2			11.283		0.717	0.035	2		0.6345	0.0025	2		0.7485	0.0115	2		0.63	0.036	2		0.625
11.3		0.798	0.012	2		0.5295	0.1405	2		0.6615	0.0085	2		0.6935	0.0165	2		0.246	0.075	2		0.105	0.019	2		0.567	0.019	2			11.3		0.716	0.035	2		0.631	0.005	2		0.7505	0.0115	2		0.6295	0.0385	2		0.623
11.317		0.7985	0.0125	2		0.528	0.14	2		0.6615	0.0095	2		0.689	0.018	2		0.245	0.075	2		0.106	0.019	2		0.5675	0.0185	2			11.317		0.72	0.035	2		0.6305	0.0045	2		0.7505	0.0115	2		0.627	0.035	2		0.624
11.333		0.799	0.012	2		0.528	0.139	2		0.6595	0.0075	2		0.6945	0.0185	2		0.2455	0.0755	2		0.1055	0.0195	2		0.5685	0.0195	2			11.333		0.719	0.034	2		0.6295	0.0055	2		0.7465	0.0115	2		0.6275	0.0325	2		0.625
11.35		0.799	0.012	2		0.5285	0.1395	2		0.66	0.01	2		0.693	0.018	2		0.247	0.075	2		0.1055	0.0195	2		0.5675	0.0195	2			11.35		0.715	0.032	2		0.633	0.004	2		0.7485	0.0115	2		0.624	0.029	2		0.6265
11.367		0.798	0.014	2		0.5275	0.1395	2		0.6605	0.0095	2		0.693	0.017	2		0.245	0.075	2		0.105	0.02	2		0.567	0.019	2			11.367		0.718	0.032	2		0.6285	0.0045	2		0.7475	0.0115	2		0.6265	0.0325	2		0.624
11.383		0.797	0.012	2		0.5275	0.1405	2		0.66	0.011	2		0.694	0.017	2		0.2445	0.0745	2		0.1045	0.0195	2		0.565	0.018	2			11.383		0.7175	0.0325	2		0.632	0.007	2		0.7455	0.0115	2		0.6285	0.0355	2		0.627
11.4		0.8	0.014	2		0.526	0.141	2		0.6575	0.0115	2		0.692	0.018	2		0.2425	0.0735	2		0.1045	0.0205	2		0.5645	0.0175	2			11.4		0.716	0.034	2		0.63	0.004	2		0.7465	0.0115	2		0.622	0.03	2		0.624
11.417		0.798	0.012	2		0.526	0.141	2		0.6585	0.0105	2		0.6925	0.0165	2		0.2435	0.0735	2		0.1045	0.0205	2		0.565	0.02	2			11.417		0.717	0.032	2		0.633	0.006	2		0.745	0.012	2		0.624	0.031	2		0.623
11.433		0.7965	0.0125	2		0.526	0.141	2		0.6575	0.0115	2		0.692	0.017	2		0.2435	0.0735	2		0.104	0.02	2		0.5665	0.0185	2			11.433		0.718	0.033	2		0.63	0.004	2		0.7415	0.0115	2		0.6275	0.0345	2		0.6235
11.45		0.7975	0.0135	2		0.524	0.141	2		0.6575	0.0105	2		0.6925	0.0175	2		0.242	0.072	2		0.104	0.02	2		0.564	0.018	2			11.45		0.716	0.034	2		0.6335	0.0065	2		0.7405	0.0115	2		0.626	0.032	2		0.6235
11.467		0.796	0.013	2		0.5235	0.1415	2		0.657	0.01	2		0.6915	0.0175	2		0.2415	0.0715	2		0.103	0.02	2		0.564	0.021	2			11.467		0.7135	0.0315	2		0.6315	0.0015	2		0.7435	0.0115	2		0.63	0.039	2		0.6245
11.483		0.7975	0.0125	2		0.522	0.141	2		0.656	0.009	2		0.691	0.018	2		0.241	0.072	2		0.1035	0.0205	2		0.563	0.018	2			11.483		0.7155	0.0345	2		0.63	0.005	2		0.7445	0.0115	2		0.624	0.031	2		0.623
11.5		0.7965	0.0125	2		0.5245	0.1405	2		0.657	0.009	2		0.6915	0.0185	2		0.242	0.073	2		0.103	0.02	2		0.5625	0.0185	2			11.5		0.7145	0.0335	2		0.629	0.004	2		0.745	0.012	2		0.6255	0.0325	2		0.627
11.517		0.797	0.012	2		0.522	0.14	2		0.6585	0.0085	2		0.6925	0.0175	2		0.2405	0.0725	2		0.1025	0.0205	2		0.562	0.019	2			11.517		0.7155	0.0345	2		0.6315	0.0055	2		0.746	0.011	2		0.623	0.032	2		0.622
11.533		0.795	0.014	2		0.5215	0.1405	2		0.6555	0.0105	2		0.6915	0.0175	2		0.24	0.072	2		0.102	0.02	2		0.5635	0.0215	2			11.533		0.715	0.033	2		0.632	0.005	2		0.7475	0.0115	2		0.6265	0.0335	2		0.6215
11.55		0.795	0.015	2		0.5235	0.1405	2		0.6555	0.0085	2		0.6895	0.0185	2		0.2405	0.0735	2		0.1025	0.0205	2		0.5605	0.0195	2			11.55		0.7145	0.0345	2		0.628	0.002	2		0.7435	0.0115	2		0.624	0.03	2		0.622
11.567		0.795	0.013	2		0.52	0.142	2		0.655	0.009	2		0.69	0.018	2		0.2375	0.0705	2		0.1025	0.0205	2		0.561	0.021	2			11.567		0.716	0.035	2		0.629	0.007	2		0.746	0.011	2		0.6285	0.0345	2		0.619
11.583		0.798	0.012	2		0.5195	0.1415	2		0.656	0.008	2		0.689	0.018	2		0.2375	0.0715	2		0.1015	0.0205	2		0.562	0.021	2			11.583		0.7135	0.0325	2		0.631	0.006	2		0.7445	0.0135	2		0.624	0.032	2		0.6235
11.6		0.796	0.013	2		0.5175	0.1425	2		0.656	0.009	2		0.689	0.017	2		0.236	0.07	2		0.1015	0.0205	2		0.5615	0.0205	2			11.6		0.716	0.033	2		0.632	0.007	2		0.7405	0.0115	2		0.6285	0.0365	2		0.6235
11.617		0.7955	0.0125	2		0.5195	0.1425	2		0.6535	0.0095	2		0.688	0.017	2		0.2375	0.0705	2		0.1015	0.0205	2		0.5615	0.0185	2			11.617		0.7165	0.0335	2		0.6315	0.0045	2		0.7395	0.0125	2		0.627	0.037	2		0.6195
11.633		0.795	0.013	2		0.518	0.142	2		0.653	0.011	2		0.691	0.017	2		0.2365	0.0705	2		0.1005	0.0205	2		0.5625	0.0195	2			11.633		0.7165	0.0345	2		0.6295	0.0055	2		0.7415	0.0135	2		0.622	0.032	2		0.62
11.65		0.795	0.013	2		0.5185	0.1415	2		0.655	0.009	2		0.6885	0.0175	2		0.2375	0.0705	2		0.1005	0.0205	2		0.562	0.02	2			11.65		0.717	0.033	2		0.6295	0.0055	2		0.744	0.012	2		0.6275	0.0365	2		0.6205
11.667		0.7955	0.0125	2		0.52	0.139	2		0.6535	0.0105	2		0.689	0.018	2		0.2385	0.0735	2		0.1005	0.0205	2		0.5605	0.0195	2			11.667		0.716	0.032	2		0.632	0.006	2		0.7415	0.0115	2		0.6255	0.0335	2		0.6195
11.683		0.7965	0.0145	2		0.5175	0.1405	2		0.653	0.01	2		0.69	0.017	2		0.2365	0.0715	2		0.1	0.021	2		0.5615	0.0195	2			11.683		0.717	0.035	2		0.6285	0.0025	2		0.7465	0.0115	2		0.6295	0.0375	2		0.6215
11.7		0.795	0.013	2		0.5195	0.1395	2		0.652	0.01	2		0.687	0.018	2		0.238	0.073	2		0.1005	0.0205	2		0.559	0.019	2			11.7		0.714	0.033	2		0.6295	0.0025	2		0.7375	0.0115	2		0.6215	0.0315	2		0.6205
11.717		0.7955	0.0135	2		0.518	0.141	2		0.6515	0.0095	2		0.688	0.018	2		0.236	0.071	2		0.1005	0.0205	2		0.5595	0.0195	2			11.717		0.7145	0.0315	2		0.628	0.004	2		0.739	0.012	2		0.621	0.031	2		0.6185
11.733		0.7965	0.0135	2		0.52	0.14	2		0.651	0.01	2		0.6845	0.0185	2		0.238	0.073	2		0.1	0.021	2		0.558	0.019	2			11.733		0.7145	0.0315	2		0.63	0.004	2		0.74	0.012	2		0.6265	0.0355	2		0.6185
11.75		0.795	0.014	2		0.522	0.141	2		0.6545	0.0085	2		0.684	0.018	2		0.2385	0.0735	2		0.0995	0.0205	2		0.5585	0.0195	2			11.75		0.7175	0.0355	2		0.6285	0.0045	2		0.741	0.012	2		0.6255	0.0345	2		0.6205
11.767		0.7965	0.0135	2		0.5225	0.1395	2		0.653	0.009	2		0.686	0.017	2		0.239	0.075	2		0.099	0.021	2		0.558	0.019	2			11.767		0.7155	0.0335	2		0.6295	0.0055	2		0.7445	0.0115	2		0.623	0.033	2		0.618
11.783		0.797	0.013	2		0.521	0.14	2		0.6525	0.0095	2		0.685	0.018	2		0.238	0.074	2		0.0995	0.0215	2		0.5565	0.0195	2			11.783		0.714	0.032	2		0.627	0.004	2		0.7495	0.0115	2		0.6255	0.0345	2		0.6205
11.8		0.7955	0.0135	2		0.5185	0.1405	2		0.6515	0.0105	2		0.685	0.018	2		0.237	0.072	2		0.0985	0.0205	2		0.558	0.019	2			11.8		0.712	0.033	2		0.6285	0.0005	2		0.7415	0.0125	2		0.6245	0.0355	2		0.618
11.817		0.7935	0.0135	2		0.5185	0.1415	2		0.6525	0.0115	2		0.6855	0.0175	2		0.236	0.072	2		0.099	0.021	2		0.5575	0.0215	2			11.817		0.714	0.035	2		0.63	0.005	2		0.7415	0.0115	2		0.629	0.039	2		0.6205
11.833		0.7925	0.0135	2		0.519	0.141	2		0.651	0.009	2		0.6855	0.0175	2		0.2365	0.0725	2		0.0985	0.0205	2		0.5565	0.0205	2			11.833		0.7165	0.0335	2		0.629	0.005	2		0.7445	0.0125	2		0.622	0.032	2		0.6175
11.85		0.7955	0.0125	2		0.5175	0.1395	2		0.65	0.009	2		0.685	0.017	2		0.236	0.073	2		0.098	0.021	2		0.556	0.02	2			11.85		0.716	0.033	2		0.628	0.004	2		0.7445	0.0115	2		0.629	0.039	2		0.6165
11.867		0.7925	0.0135	2		0.517	0.141	2		0.6505	0.0095	2		0.6845	0.0175	2		0.235	0.072	2		0.098	0.021	2		0.5555	0.0185	2			11.867		0.7165	0.0355	2		0.626	0.006	2		0.746	0.012	2		0.6205	0.0295	2		0.6175
11.883		0.794	0.013	2		0.519	0.139	2		0.6475	0.0075	2		0.684	0.018	2		0.237	0.074	2		0.098	0.021	2		0.556	0.022	2			11.883		0.7155	0.0345	2		0.6305	0.0045	2		0.743	0.012	2		0.6225	0.0315	2		0.618
11.9		0.7955	0.0125	2		0.5185	0.1405	2		0.65	0.009	2		0.6855	0.0175	2		0.236	0.073	2		0.098	0.021	2		0.555	0.02	2			11.9		0.7145	0.0395	2		0.627	0.002	2		0.747	0.011	2		0.625	0.036	2		0.619
11.917		0.7895	0.0145	2		0.5185	0.1385	2		0.6485	0.0085	2		0.683	0.018	2		0.2365	0.0745	2		0.097	0.021	2		0.5555	0.0195	2			11.917		0.714	0.036	2		0.63	0.004	2		0.746	0.013	2		0.628	0.038	2		0.617
11.933		0.7915	0.0145	2		0.518	0.141	2		0.6465	0.0085	2		0.6825	0.0175	2		0.235	0.073	2		0.0975	0.0205	2		0.5555	0.0205	2			11.933		0.7125	0.0335	2		0.6305	0.0045	2		0.7465	0.0125	2		0.6235	0.0365	2		0.6135
11.95		0.791	0.015	2		0.5175	0.1405	2		0.648	0.008	2		0.6825	0.0175	2		0.235	0.073	2		0.097	0.021	2		0.5535	0.0195	2			11.95		0.71	0.036	2		0.627	0.003	2		0.747	0.012	2		0.626	0.036	2		0.615
11.967		0.793	0.015	2		0.5185	0.1385	2		0.6485	0.0085	2		0.683	0.017	2		0.236	0.075	2		0.097	0.021	2		0.555	0.021	2			11.967		0.716	0.034	2		0.628	0.004	2		0.7475	0.0115	2		0.621	0.032	2		0.6155
11.983		0.794	0.014	2		0.5195	0.1395	2		0.647	0.008	2		0.6835	0.0165	2		0.237	0.075	2		0.097	0.021	2		0.5545	0.0215	2			11.983		0.7095	0.0315	2		0.6245	0.0015	2		0.7475	0.0115	2		0.625	0.035	2		0.614
12		0.794	0.014	2		0.516	0.139	2		0.648	0.01	2		0.682	0.018	2		0.234	0.073	2		0.097	0.021	2		0.554	0.021	2			12		0.715	0.035	2		0.6285	0.0045	2		0.746	0.012	2		0.6235	0.0355	2		0.6155
12.017		0.7935	0.0135	2		0.5155	0.1405	2		0.647	0.01	2		0.6805	0.0175	2		0.2325	0.0725	2		0.0965	0.0215	2		0.552	0.018	2			12.017		0.7135	0.0325	2		0.629	0.005	2		0.744	0.012	2		0.623	0.035	2		0.617
12.033		0.7935	0.0125	2		0.5175	0.1385	2		0.648	0.009	2		0.682	0.017	2		0.235	0.075	2		0.0965	0.0215	2		0.5535	0.0185	2			12.033		0.7115	0.0345	2		0.628	0.004	2		0.7445	0.0115	2		0.6225	0.0345	2		0.6145
12.05		0.793	0.014	2		0.515	0.14	2		0.6445	0.0105	2		0.683	0.018	2		0.2325	0.0725	2		0.096	0.021	2		0.553	0.02	2			12.05		0.7145	0.0325	2		0.6295	0.0065	2		0.7465	0.0115	2		0.6245	0.0355	2		0.6155
12.067		0.794	0.014	2		0.516	0.138	2		0.646	0.007	2		0.682	0.018	2		0.234	0.075	2		0.0965	0.0215	2		0.5525	0.0185	2			12.067		0.712	0.034	2		0.63	0.004	2		0.7425	0.0115	2		0.6215	0.0335	2		0.616
12.083		0.791	0.018	2		0.516	0.14	2		0.646	0.007	2		0.6805	0.0185	2		0.2325	0.0735	2		0.0955	0.0215	2		0.5515	0.0175	2			12.083		0.7135	0.0325	2		0.625	0.002	2		0.7425	0.0115	2		0.6205	0.0335	2		0.613
12.1		0.7935	0.0145	2		0.5135	0.1405	2		0.646	0.009	2		0.68	0.018	2		0.2315	0.0715	2		0.095	0.021	2		0.5525	0.0195	2			12.1		0.7155	0.0295	2		0.628	0.004	2		0.7425	0.0115	2		0.623	0.034	2		0.6145
12.117		0.789	0.016	2		0.5145	0.1385	2		0.646	0.009	2		0.6815	0.0175	2		0.2325	0.0735	2		0.095	0.021	2		0.552	0.02	2			12.117		0.7195	0.0295	2		0.629	0.005	2		0.7445	0.0115	2		0.6205	0.0335	2		0.6135
12.133		0.7925	0.0145	2		0.514	0.139	2		0.645	0.01	2		0.6815	0.0175	2		0.232	0.073	2		0.0955	0.0215	2		0.552	0.019	2			12.133		0.715	0.034	2		0.63	0.002	2		0.743	0.011	2		0.618	0.03	2		0.612
12.15		0.79	0.015	2		0.5145	0.1395	2		0.6455	0.0085	2		0.6795	0.0185	2		0.232	0.073	2		0.095	0.022	2		0.551	0.02	2			12.15		0.715	0.034	2		0.6305	0.0045	2		0.7445	0.0115	2		0.619	0.032	2		0.613
12.167		0.791	0.015	2		0.5135	0.1395	2		0.645	0.01	2		0.6805	0.0175	2		0.2315	0.0735	2		0.0945	0.0215	2		0.55	0.021	2			12.167		0.716	0.033	2		0.6275	0.0045	2		0.7455	0.0115	2		0.623	0.036	2		0.6105
12.183		0.791	0.013	2		0.515	0.138	2		0.644	0.011	2		0.678	0.017	2		0.233	0.074	2		0.095	0.021	2		0.551	0.02	2			12.183		0.713	0.036	2		0.626	0.008	2		0.7455	0.0115	2		0.622	0.034	2		0.6115
12.2		0.7905	0.0145	2		0.5125	0.1385	2		0.6435	0.0105	2		0.6785	0.0185	2		0.2315	0.0735	2		0.094	0.021	2		0.5495	0.0195	2			12.2		0.7105	0.0345	2		0.6265	0.0075	2		0.7445	0.0105	2		0.6215	0.0335	2		0.612
12.217		0.79	0.015	2		0.513	0.139	2		0.6435	0.0085	2		0.6785	0.0175	2		0.2315	0.0735	2		0.094	0.021	2		0.5495	0.0205	2			12.217		0.712	0.036	2		0.627	0.006	2		0.7465	0.0115	2		0.625	0.037	2		0.6125
12.233		0.791	0.016	2		0.515	0.14	2		0.642	0.009	2		0.678	0.017	2		0.232	0.074	2		0.0945	0.0215	2		0.549	0.019	2			12.233		0.7115	0.0375	2		0.631	0.005	2		0.7435	0.0115	2		0.619	0.031	2		0.613
12.25		0.79	0.013	2		0.5135	0.1385	2		0.6445	0.0105	2		0.6805	0.0175	2		0.232	0.074	2		0.094	0.022	2		0.55	0.02	2			12.25		0.709	0.037	2		0.628	0.006	2		0.7445	0.0125	2		0.625	0.038	2		0.61
12.267		0.7925	0.0145	2		0.514	0.139	2		0.642	0.009	2		0.6785	0.0175	2		0.2315	0.0745	2		0.0935	0.0215	2		0.5495	0.0205	2			12.267		0.7125	0.0335	2		0.627	0.004	2		0.742	0.014	2		0.623	0.035	2		0.613
12.283		0.792	0.016	2		0.515	0.139	2		0.6415	0.0105	2		0.6785	0.0165	2		0.2325	0.0745	2		0.0935	0.0215	2		0.5495	0.0195	2			12.283		0.711	0.036	2		0.63	0.008	2		0.742	0.013	2		0.6265	0.0395	2		0.613
12.3		0.7915	0.0155	2		0.514	0.139	2		0.6395	0.0095	2		0.6775	0.0175	2		0.2315	0.0735	2		0.0935	0.0215	2		0.5475	0.0175	2			12.3		0.711	0.032	2		0.6285	0.0075	2		0.7445	0.0135	2		0.623	0.037	2		0.6105
12.317		0.791	0.016	2		0.5145	0.1385	2		0.641	0.008	2		0.6765	0.0165	2		0.2325	0.0745	2		0.0935	0.0215	2		0.547	0.021	2			12.317		0.7105	0.0345	2		0.63	0.003	2		0.7405	0.0125	2		0.623	0.035	2		0.6105
12.333		0.789	0.015	2		0.513	0.14	2		0.641	0.009	2		0.6775	0.0175	2		0.2305	0.0735	2		0.0925	0.0215	2		0.5485	0.0195	2			12.333		0.712	0.034	2		0.626	0.007	2		0.7485	0.0115	2		0.618	0.032	2		0.6125
12.35		0.7895	0.0155	2		0.512	0.14	2		0.6415	0.0115	2		0.6775	0.0175	2		0.229	0.073	2		0.0925	0.0215	2		0.548	0.02	2			12.35		0.712	0.035	2		0.6285	0.0045	2		0.7435	0.0125	2		0.621	0.036	2		0.6115
12.367		0.7895	0.0155	2		0.512	0.138	2		0.642	0.01	2		0.679	0.018	2		0.2305	0.0745	2		0.0925	0.0215	2		0.547	0.019	2			12.367		0.712	0.033	2		0.625	0.004	2		0.7445	0.0125	2		0.6225	0.0355	2		0.614
12.383		0.79	0.015	2		0.514	0.139	2		0.6415	0.0105	2		0.677	0.017	2		0.2305	0.0745	2		0.0925	0.0215	2		0.548	0.02	2			12.383		0.709	0.033	2		0.627	0.008	2		0.7455	0.0115	2		0.6195	0.0335	2		0.613
12.4		0.79	0.015	2		0.514	0.14	2		0.639	0.009	2		0.6745	0.0175	2		0.23	0.074	2		0.092	0.021	2		0.547	0.021	2			12.4		0.7085	0.0345	2		0.626	0.005	2		0.7455	0.0125	2		0.6235	0.0385	2		0.609
12.417		0.7905	0.0145	2		0.512	0.139	2		0.6395	0.0095	2		0.6755	0.0175	2		0.23	0.074	2		0.0915	0.0215	2		0.5455	0.0195	2			12.417		0.713	0.035	2		0.631	0.004	2		0.7465	0.0125	2		0.617	0.032	2		0.613
12.433		0.791	0.016	2		0.5125	0.1405	2		0.638	0.011	2		0.6755	0.0185	2		0.2285	0.0735	2		0.0915	0.0215	2		0.545	0.02	2			12.433		0.712	0.034	2		0.6265	0.0045	2		0.744	0.012	2		0.619	0.031	2		0.6095
12.45		0.788	0.016	2		0.511	0.14	2		0.6395	0.0105	2		0.676	0.018	2		0.229	0.073	2		0.0915	0.0215	2		0.5445	0.0215	2			12.45		0.7145	0.0345	2		0.628	0.005	2		0.745	0.012	2		0.6175	0.0325	2		0.609
12.467		0.7885	0.0145	2		0.5115	0.1405	2		0.638	0.011	2		0.6755	0.0175	2		0.228	0.073	2		0.091	0.021	2		0.5445	0.0215	2			12.467		0.7125	0.0355	2		0.6265	0.0085	2		0.745	0.01	2		0.619	0.034	2		0.6125
12.483		0.7885	0.0135	2		0.5105	0.1405	2		0.639	0.01	2		0.675	0.018	2		0.228	0.072	2		0.0915	0.0215	2		0.544	0.021	2			12.483		0.7095	0.0335	2		0.6265	0.0085	2		0.745	0.012	2		0.622	0.037	2		0.61
12.5		0.789	0.016	2		0.51	0.139	2		0.6375	0.0095	2		0.673	0.019	2		0.228	0.073	2		0.091	0.021	2		0.5435	0.0215	2			12.5		0.7075	0.0365	2		0.628	0.009	2		0.7465	0.0115	2		0.622	0.034	2		0.6085
12.517		0.7875	0.0195	2		0.51	0.141	2		0.638	0.009	2		0.674	0.019	2		0.227	0.072	2		0.0915	0.0215	2		0.5445	0.0215	2			12.517		0.7095	0.0355	2		0.6255	0.0055	2		0.7465	0.0115	2		0.6215	0.0375	2		0.6075
12.533		0.788	0.015	2		0.51	0.138	2		0.6375	0.0085	2		0.671	0.018	2		0.229	0.073	2		0.0905	0.0215	2		0.544	0.021	2			12.533		0.713	0.035	2		0.626	0.005	2		0.7435	0.0115	2		0.621	0.035	2		0.609
12.55		0.788	0.016	2		0.5105	0.1395	2		0.637	0.009	2		0.6755	0.0175	2		0.228	0.073	2		0.0905	0.0215	2		0.544	0.022	2			12.55		0.717	0.026	2		0.6275	0.0075	2		0.7455	0.0115	2		0.622	0.037	2		0.6095
12.567		0.7865	0.0185	2		0.5085	0.1395	2		0.6365	0.0085	2		0.674	0.017	2		0.2275	0.0715	2		0.0905	0.0215	2		0.542	0.021	2			12.567		0.725	0.023	2		0.625	0.005	2		0.7415	0.0115	2		0.6205	0.0375	2		0.61
12.583		0.7875	0.0155	2		0.5095	0.1385	2		0.6365	0.0095	2		0.6735	0.0165	2		0.228	0.073	2		0.0905	0.0215	2		0.543	0.021	2			12.583		0.7175	0.0275	2		0.6265	0.0045	2		0.743	0.012	2		0.6215	0.0365	2		0.6115
12.6		0.789	0.016	2		0.511	0.14	2		0.6365	0.0095	2		0.6725	0.0175	2		0.228	0.073	2		0.0905	0.0215	2		0.542	0.021	2			12.6		0.7125	0.0365	2		0.625	0.006	2		0.744	0.012	2		0.621	0.036	2		0.612
12.617		0.787	0.017	2		0.511	0.14	2		0.635	0.009	2		0.67	0.018	2		0.228	0.073	2		0.09	0.022	2		0.542	0.021	2			12.617		0.712	0.034	2		0.6275	0.0065	2		0.745	0.012	2		0.623	0.037	2		0.6065
12.633		0.7885	0.0155	2		0.5095	0.1395	2		0.637	0.01	2		0.672	0.017	2		0.2275	0.0725	2		0.09	0.022	2		0.5415	0.0205	2			12.633		0.7115	0.0345	2		0.626	0.008	2		0.744	0.012	2		0.618	0.033	2		0.6085
12.65		0.789	0.014	2		0.508	0.14	2		0.636	0.008	2		0.673	0.017	2		0.2265	0.0715	2		0.09	0.022	2		0.5425	0.0205	2			12.65		0.712	0.035	2		0.6255	0.0065	2		0.7425	0.0115	2		0.621	0.035	2		0.6085
12.667		0.7865	0.0145	2		0.5085	0.1395	2		0.6355	0.0085	2		0.6735	0.0165	2		0.2265	0.0715	2		0.0895	0.0215	2		0.543	0.021	2			12.667		0.71	0.038	2		0.625	0.006	2		0.743	0.012	2		0.6185	0.0335	2		0.6075
12.683		0.787	0.016	2		0.5095	0.1385	2		0.6355	0.0085	2		0.672	0.017	2		0.2285	0.0725	2		0.0895	0.0215	2		0.5415	0.0205	2			12.683		0.7075	0.0325	2		0.628	0.006	2		0.741	0.012	2		0.6195	0.0365	2		0.611
12.7		0.787	0.015	2		0.514	0.138	2		0.6355	0.0095	2		0.67	0.018	2		0.231	0.076	2		0.0895	0.0215	2		0.539	0.02	2			12.7		0.71	0.034	2		0.626	0.009	2		0.742	0.012	2		0.6205	0.0365	2		0.608
12.717		0.785	0.017	2		0.51	0.138	2		0.6345	0.0105	2		0.67	0.019	2		0.228	0.074	2		0.089	0.022	2		0.54	0.021	2			12.717		0.7105	0.0325	2		0.625	0.007	2		0.7435	0.0105	2		0.6165	0.0345	2		0.6085
12.733		0.787	0.014	2		0.509	0.14	2		0.634	0.009	2		0.6715	0.0175	2		0.2265	0.0725	2		0.089	0.022	2		0.54	0.02	2			12.733		0.707	0.036	2		0.6245	0.0045	2		0.7405	0.0115	2		0.621	0.037	2		0.6065
12.75		0.789	0.015	2		0.508	0.14	2		0.634	0.009	2		0.673	0.018	2		0.2265	0.0715	2		0.0885	0.0225	2		0.5395	0.0215	2			12.75		0.7105	0.0345	2		0.6295	0.0055	2		0.7405	0.0115	2		0.617	0.031	2		0.6065
12.767		0.785	0.016	2		0.5075	0.1385	2		0.6355	0.0095	2		0.671	0.018	2		0.2265	0.0725	2		0.089	0.022	2		0.539	0.022	2			12.767		0.712	0.036	2		0.626	0.006	2		0.741	0.012	2		0.62	0.036	2		0.609
12.783		0.7865	0.0155	2		0.51	0.139	2		0.6345	0.0095	2		0.672	0.018	2		0.2275	0.0735	2		0.0885	0.0215	2		0.538	0.019	2			12.783		0.7095	0.0355	2		0.628	0.007	2		0.7395	0.0115	2		0.621	0.036	2		0.6095
12.8		0.7885	0.0165	2		0.508	0.14	2		0.6315	0.0085	2		0.6695	0.0185	2		0.226	0.072	2		0.089	0.022	2		0.537	0.02	2			12.8		0.71	0.037	2		0.6275	0.0045	2		0.742	0.011	2		0.621	0.036	2		0.6095
12.817		0.7865	0.0155	2		0.509	0.14	2		0.633	0.011	2		0.668	0.018	2		0.2265	0.0725	2		0.089	0.022	2		0.5385	0.0205	2			12.817		0.711	0.034	2		0.6215	0.0035	2		0.7415	0.0125	2		0.623	0.041	2		0.6085
12.833		0.783	0.015	2		0.5065	0.1395	2		0.633	0.008	2		0.6695	0.0185	2		0.2255	0.0715	2		0.088	0.022	2		0.537	0.02	2			12.833		0.7105	0.0335	2		0.6255	0.0065	2		0.7425	0.0125	2		0.6185	0.0355	2		0.6075
12.85		0.788	0.015	2		0.503	0.139	2		0.6325	0.0105	2		0.67	0.018	2		0.224	0.069	2		0.0875	0.0215	2		0.5365	0.0195	2			12.85		0.71	0.033	2		0.622	0.007	2		0.741	0.012	2		0.6215	0.0365	2		0.607
12.867		0.787	0.017	2		0.505	0.14	2		0.631	0.01	2		0.668	0.018	2		0.225	0.07	2		0.088	0.022	2		0.536	0.021	2			12.867		0.7115	0.0355	2		0.624	0.004	2		0.741	0.012	2		0.62	0.035	2		0.609
12.883		0.787	0.016	2		0.5045	0.1395	2		0.6325	0.0095	2		0.6695	0.0175	2		0.2245	0.0705	2		0.0875	0.0215	2		0.537	0.02	2			12.883		0.712	0.035	2		0.622	0.003	2		0.74	0.012	2		0.6215	0.0385	2		0.607
12.9		0.7855	0.0165	2		0.5035	0.1415	2		0.633	0.01	2		0.6685	0.0175	2		0.223	0.068	2		0.088	0.022	2		0.538	0.021	2			12.9		0.709	0.036	2		0.625	0.003	2		0.739	0.012	2		0.619	0.037	2		0.6115
12.917		0.7855	0.0175	2		0.505	0.14	2		0.631	0.009	2		0.6685	0.0175	2		0.224	0.07	2		0.0875	0.0225	2		0.5375	0.0215	2			12.917		0.7085	0.0325	2		0.6215	0.0035	2		0.743	0.012	2		0.619	0.037	2		0.6065
12.933		0.788	0.017	2		0.505	0.139	2		0.632	0.009	2		0.666	0.017	2		0.2245	0.0705	2		0.0875	0.0215	2		0.536	0.021	2			12.933		0.711	0.036	2		0.621	0.004	2		0.739	0.012	2		0.622	0.039	2		0.6045
12.95		0.785	0.016	2		0.507	0.138	2		0.631	0.009	2		0.668	0.018	2		0.2265	0.0725	2		0.087	0.022	2		0.537	0.022	2			12.95		0.7085	0.0335	2		0.623	0.006	2		0.74	0.012	2		0.6205	0.0395	2		0.606
12.967		0.7865	0.0175	2		0.505	0.139	2		0.6315	0.0105	2		0.6665	0.0185	2		0.2245	0.0705	2		0.0875	0.0225	2		0.536	0.021	2			12.967		0.707	0.036	2		0.624	0.006	2		0.7435	0.0125	2		0.6195	0.0355	2		0.6065
12.983		0.787	0.018	2		0.507	0.137	2		0.6325	0.0105	2		0.665	0.019	2		0.2265	0.0735	2		0.0875	0.0225	2		0.536	0.022	2			12.983		0.7075	0.0345	2		0.6245	0.0055	2		0.737	0.012	2		0.619	0.036	2		0.606
13		0.784	0.017	2		0.5045	0.1395	2		0.6295	0.0095	2		0.6685	0.0185	2		0.2245	0.0705	2		0.0875	0.0235	2		0.5365	0.0205	2			13		0.7085	0.0335	2		0.626	0.007	2		0.7385	0.0125	2		0.6185	0.0355	2		0.6065
13.017		0.787	0.016	2		0.504	0.137	2		0.6305	0.0105	2		0.664	0.018	2		0.225	0.072	2		0.0875	0.0225	2		0.5345	0.0225	2			13.017		0.712	0.036	2		0.6255	0.0035	2		0.7395	0.0125	2		0.6235	0.0385	2		0.6035
13.033		0.7865	0.0165	2		0.505	0.137	2		0.631	0.009	2		0.6655	0.0175	2		0.2255	0.0725	2		0.086	0.022	2		0.535	0.022	2			13.033		0.7075	0.0345	2		0.6265	0.0035	2		0.741	0.013	2		0.623	0.041	2		0.6085
13.05		0.786	0.015	2		0.503	0.139	2		0.629	0.01	2		0.665	0.018	2		0.223	0.071	2		0.086	0.022	2		0.5325	0.0205	2			13.05		0.709	0.037	2		0.626	0.007	2		0.7375	0.0165	2		0.616	0.034	2		0.6045
13.067		0.786	0.016	2		0.5045	0.1375	2		0.6285	0.0085	2		0.6675	0.0175	2		0.225	0.072	2		0.086	0.022	2		0.532	0.022	2			13.067		0.707	0.036	2		0.623	0.003	2		0.7425	0.0115	2		0.617	0.034	2		0.6065
13.083		0.782	0.017	2		0.505	0.139	2		0.6295	0.0115	2		0.665	0.018	2		0.2235	0.0715	2		0.0855	0.0215	2		0.534	0.021	2			13.083		0.7065	0.0345	2		0.6215	0.0065	2		0.7415	0.0125	2		0.617	0.034	2		0.607
13.1		0.782	0.016	2		0.504	0.137	2		0.6295	0.0105	2		0.664	0.018	2		0.2235	0.0725	2		0.086	0.022	2		0.5325	0.0225	2			13.1		0.7095	0.0355	2		0.623	0.007	2		0.7435	0.0115	2		0.615	0.034	2		0.6075
13.117		0.7845	0.0155	2		0.5055	0.1375	2		0.628	0.009	2		0.6635	0.0185	2		0.2245	0.0735	2		0.086	0.022	2		0.531	0.021	2			13.117		0.709	0.032	2		0.624	0.007	2		0.7375	0.0115	2		0.6235	0.0415	2		0.606
13.133		0.7825	0.0175	2		0.5005	0.1375	2		0.6285	0.0105	2		0.663	0.018	2		0.222	0.071	2		0.0855	0.0215	2		0.531	0.019	2			13.133		0.7075	0.0375	2		0.623	0.006	2		0.7405	0.0125	2		0.6165	0.0355	2		0.606
13.15		0.7825	0.0175	2		0.5035	0.1385	2		0.6285	0.0095	2		0.665	0.017	2		0.222	0.072	2		0.0855	0.0225	2		0.533	0.021	2			13.15		0.711	0.034	2		0.6235	0.0045	2		0.7415	0.0115	2		0.6195	0.0385	2		0.6055
13.167		0.784	0.016	2		0.5025	0.1375	2		0.626	0.01	2		0.6635	0.0175	2		0.222	0.072	2		0.0855	0.0225	2		0.531	0.022	2			13.167		0.707	0.038	2		0.6235	0.0035	2		0.737	0.012	2		0.617	0.034	2		0.6045
13.183		0.7835	0.0155	2		0.5035	0.1385	2		0.6285	0.0105	2		0.6615	0.0185	2		0.2225	0.0725	2		0.0855	0.0225	2		0.5325	0.0205	2			13.183		0.709	0.034	2		0.6225	0.0055	2		0.7365	0.0125	2		0.6195	0.0365	2		0.6075
13.2		0.781	0.017	2		0.5035	0.1385	2		0.629	0.008	2		0.664	0.017	2		0.222	0.073	2		0.085	0.022	2		0.531	0.021	2			13.2		0.707	0.036	2		0.621	0.005	2		0.7375	0.0115	2		0.6195	0.0395	2		0.6045
13.217		0.7805	0.0155	2		0.501	0.138	2		0.627	0.01	2		0.663	0.018	2		0.221	0.071	2		0.085	0.022	2		0.5315	0.0205	2			13.217		0.71	0.035	2		0.6225	0.0015	2		0.7365	0.0145	2		0.618	0.037	2		0.6075
13.233		0.782	0.017	2		0.5025	0.1375	2		0.627	0.009	2		0.662	0.018	2		0.2215	0.0725	2		0.0845	0.0225	2		0.5295	0.0205	2			13.233		0.7075	0.0355	2		0.6215	0.0045	2		0.736	0.012	2		0.6195	0.0385	2		0.6065
13.25		0.7835	0.0165	2		0.5025	0.1375	2		0.6285	0.0105	2		0.661	0.017	2		0.221	0.073	2		0.085	0.022	2		0.5305	0.0205	2			13.25		0.708	0.036	2		0.6215	0.0055	2		0.737	0.012	2		0.6175	0.0375	2		0.604
13.267		0.784	0.017	2		0.503	0.137	2		0.626	0.01	2		0.662	0.018	2		0.2225	0.0735	2		0.0845	0.0225	2		0.53	0.02	2			13.267		0.707	0.035	2		0.625	0.006	2		0.738	0.012	2		0.623	0.043	2		0.604
13.283		0.781	0.017	2		0.504	0.137	2		0.6265	0.0105	2		0.6645	0.0175	2		0.222	0.074	2		0.085	0.022	2		0.5295	0.0195	2			13.283		0.7075	0.0345	2		0.62	0.001	2		0.742	0.012	2		0.616	0.035	2		0.6035
13.3		0.783	0.017	2		0.5035	0.1375	2		0.627	0.01	2		0.6625	0.0185	2		0.2215	0.0735	2		0.0845	0.0225	2		0.529	0.022	2			13.3		0.7085	0.0355	2		0.625	0.009	2		0.739	0.012	2		0.6205	0.0385	2		0.606
13.317		0.784	0.017	2		0.503	0.137	2		0.626	0.011	2		0.661	0.017	2		0.2215	0.0735	2		0.0845	0.0225	2		0.529	0.021	2			13.317		0.706	0.032	2		0.622	0.007	2		0.739	0.012	2		0.6105	0.0305	2		0.604
13.333		0.7825	0.0185	2		0.5005	0.1375	2		0.6255	0.0115	2		0.66	0.017	2		0.22	0.072	2		0.0845	0.0215	2		0.5295	0.0215	2			13.333		0.7065	0.0335	2		0.624	0.007	2		0.74	0.011	2		0.617	0.036	2		0.6055
13.35		0.782	0.019	2		0.5005	0.1375	2		0.626	0.012	2		0.659	0.019	2		0.2195	0.0725	2		0.084	0.022	2		0.5285	0.0215	2			13.35		0.7065	0.0375	2		0.6225	0.0065	2		0.738	0.012	2		0.614	0.035	2		0.603
13.367		0.783	0.017	2		0.5005	0.1385	2		0.626	0.01	2		0.66	0.018	2		0.2185	0.0725	2		0.0835	0.0215	2		0.5285	0.0195	2			13.367		0.7065	0.0335	2		0.624	0.006	2		0.74	0.012	2		0.6165	0.0355	2		0.605
13.383		0.781	0.019	2		0.5035	0.1365	2		0.6255	0.0105	2		0.6595	0.0175	2		0.221	0.075	2		0.0835	0.0215	2		0.5285	0.0205	2			13.383		0.707	0.033	2		0.621	0.003	2		0.738	0.012	2		0.619	0.04	2		0.6045
13.4		0.7815	0.0175	2		0.501	0.138	2		0.625	0.009	2		0.6585	0.0185	2		0.219	0.073	2		0.0835	0.0225	2		0.528	0.022	2			13.4		0.7065	0.0325	2		0.6215	0.0065	2		0.7385	0.0115	2		0.6195	0.0395	2		0.602
13.417		0.7825	0.0185	2		0.502	0.137	2		0.624	0.009	2		0.6585	0.0185	2		0.22	0.075	2		0.083	0.022	2		0.526	0.021	2			13.417		0.704	0.034	2		0.6235	0.0065	2		0.735	0.012	2		0.615	0.036	2		0.605
13.433		0.7805	0.0175	2		0.499	0.138	2		0.623	0.01	2		0.6595	0.0185	2		0.2175	0.0725	2		0.0835	0.0215	2		0.527	0.022	2			13.433		0.707	0.035	2		0.621	0.003	2		0.7355	0.0125	2		0.617	0.037	2		0.6045
13.45		0.779	0.016	2		0.498	0.138	2		0.624	0.012	2		0.66	0.018	2		0.2175	0.0715	2		0.0825	0.0215	2		0.527	0.02	2			13.45		0.706	0.034	2		0.6225	0.0075	2		0.737	0.012	2		0.618	0.038	2		0.607
13.467		0.78	0.017	2		0.498	0.137	2		0.624	0.009	2		0.6595	0.0165	2		0.2175	0.0725	2		0.083	0.022	2		0.524	0.022	2			13.467		0.7095	0.0355	2		0.621	0.005	2		0.738	0.012	2		0.6155	0.0375	2		0.6055
13.483		0.7815	0.0185	2		0.499	0.138	2		0.6245	0.0115	2		0.659	0.02	2		0.2175	0.0725	2		0.083	0.022	2		0.526	0.022	2			13.483		0.7095	0.0355	2		0.621	0.008	2		0.739	0.012	2		0.6205	0.0395	2		0.602
13.5		0.78	0.017	2		0.499	0.136	2		0.623	0.01	2		0.659	0.018	2		0.2185	0.0735	2		0.083	0.022	2		0.5265	0.0205	2			13.5		0.7065	0.0365	2		0.6225	0.0055	2		0.7375	0.0125	2		0.6155	0.0345	2		0.607
13.517		0.7805	0.0185	2		0.501	0.137	2		0.6235	0.0105	2		0.6585	0.0185	2		0.219	0.075	2		0.083	0.022	2		0.527	0.022	2			13.517		0.7065	0.0355	2		0.6215	0.0095	2		0.739	0.012	2		0.621	0.041	2		0.604
13.533		0.78	0.018	2		0.497	0.136	2		0.6215	0.0095	2		0.6595	0.0175	2		0.2175	0.0725	2		0.0825	0.0215	2		0.5255	0.0205	2			13.533		0.7075	0.0345	2		0.6235	0.0055	2		0.738	0.012	2		0.619	0.04	2		0.6055
13.55		0.7815	0.0165	2		0.498	0.136	2		0.623	0.011	2		0.658	0.019	2		0.217	0.074	2		0.082	0.022	2		0.5245	0.0205	2			13.55		0.707	0.035	2		0.6235	0.0045	2		0.7355	0.0125	2		0.6195	0.0415	2		0.608
13.567		0.782	0.017	2		0.5005	0.1355	2		0.6205	0.0095	2		0.659	0.019	2		0.2195	0.0755	2		0.0825	0.0225	2		0.525	0.021	2			13.567		0.705	0.033	2		0.622	0.001	2		0.735	0.012	2		0.61	0.031	2		0.602
13.583		0.78	0.019	2		0.501	0.135	2		0.6225	0.0095	2		0.6555	0.0185	2		0.2205	0.0755	2		0.0815	0.0215	2		0.5235	0.0205	2			13.583		0.7055	0.0345	2		0.619	0.004	2		0.736	0.012	2		0.6205	0.0415	2		0.605
13.6		0.78	0.016	2		0.5005	0.1345	2		0.622	0.01	2		0.6575	0.0185	2		0.2195	0.0755	2		0.0815	0.0215	2		0.523	0.021	2			13.6		0.707	0.034	2		0.624	0.008	2		0.74	0.012	2		0.615	0.035	2		0.604
13.617		0.7805	0.0175	2		0.499	0.136	2		0.619	0.01	2		0.6545	0.0185	2		0.218	0.074	2		0.0815	0.0215	2		0.524	0.022	2			13.617		0.7075	0.0335	2		0.625	0.003	2		0.7385	0.0125	2		0.62	0.039	2		0.6055
13.633		0.7835	0.0165	2		0.5005	0.1345	2		0.6205	0.0085	2		0.6565	0.0185	2		0.2195	0.0755	2		0.0815	0.0215	2		0.5245	0.0215	2			13.633		0.7055	0.0335	2		0.624	0.007	2		0.7395	0.0125	2		0.617	0.04	2		0.604
13.65		0.7805	0.0155	2		0.5	0.133	2		0.6185	0.0085	2		0.6565	0.0185	2		0.221	0.076	2		0.081	0.022	2		0.525	0.023	2			13.65		0.706	0.035	2		0.621	0.008	2		0.737	0.013	2		0.6175	0.0395	2		0.6035
13.667		0.7805	0.0175	2		0.499	0.134	2		0.619	0.011	2		0.655	0.018	2		0.219	0.075	2		0.0815	0.0215	2		0.5215	0.0205	2			13.667		0.702	0.034	2		0.623	0.005	2		0.7385	0.0125	2		0.619	0.038	2		0.6035
13.683		0.7825	0.0165	2		0.5	0.135	2		0.619	0.01	2		0.6525	0.0185	2		0.2195	0.0755	2		0.0815	0.0215	2		0.5235	0.0215	2			13.683		0.704	0.031	2		0.6215	0.0045	2		0.739	0.012	2		0.616	0.037	2		0.6055
13.7		0.781	0.016	2		0.499	0.136	2		0.6185	0.0095	2		0.654	0.018	2		0.218	0.074	2		0.0815	0.0215	2		0.5225	0.0225	2			13.7		0.705	0.037	2		0.622	0.004	2		0.74	0.012	2		0.616	0.038	2		0.603
13.717		0.778	0.016	2		0.4975	0.1355	2		0.618	0.01	2		0.655	0.018	2		0.2175	0.0735	2		0.0815	0.0215	2		0.523	0.021	2			13.717		0.705	0.033	2		0.62	0.01	2		0.7385	0.0125	2		0.6195	0.0395	2		0.599
13.733		0.779	0.016	2		0.497	0.137	2		0.617	0.01	2		0.6555	0.0175	2		0.216	0.072	2		0.081	0.022	2		0.5225	0.0215	2			13.733		0.704	0.034	2		0.623	0.006	2		0.7375	0.0125	2		0.6195	0.0385	2		0.605
13.75		0.779	0.015	2		0.4995	0.1335	2		0.6205	0.0095	2		0.6515	0.0195	2		0.22	0.075	2		0.0805	0.0215	2		0.521	0.021	2			13.75		0.706	0.035	2		0.6205	0.0045	2		0.7385	0.0125	2		0.618	0.039	2		0.603
13.767		0.7805	0.0175	2		0.498	0.137	2		0.6185	0.0105	2		0.653	0.018	2		0.2175	0.0725	2		0.081	0.022	2		0.5215	0.0225	2			13.767		0.704	0.032	2		0.619	0.004	2		0.74	0.012	2		0.62	0.04	2		0.6065
13.783		0.775	0.016	2		0.496	0.135	2		0.62	0.009	2		0.651	0.018	2		0.217	0.073	2		0.0815	0.0215	2		0.5205	0.0205	2			13.783		0.705	0.038	2		0.619	0.005	2		0.74	0.012	2		0.618	0.041	2		0.6035
13.8		0.7805	0.0165	2		0.4965	0.1355	2		0.618	0.01	2		0.6535	0.0185	2		0.217	0.073	2		0.0805	0.0215	2		0.5205	0.0205	2			13.8		0.7045	0.0365	2		0.6215	0.0085	2		0.7385	0.0095	2		0.6145	0.0365	2		0.604
13.817		0.7785	0.0165	2		0.497	0.136	2		0.6175	0.0105	2		0.651	0.018	2		0.217	0.073	2		0.0805	0.0215	2		0.5205	0.0205	2			13.817		0.703	0.035	2		0.62	0.007	2		0.7365	0.0115	2		0.617	0.038	2		0.605
13.833		0.781	0.017	2		0.496	0.136	2		0.616	0.011	2		0.6535	0.0175	2		0.2165	0.0725	2		0.0805	0.0215	2		0.52	0.022	2			13.833		0.7015	0.0395	2		0.6195	0.0055	2		0.736	0.012	2		0.6165	0.0375	2		0.606
13.85		0.7785	0.0155	2		0.4945	0.1355	2		0.6175	0.0105	2		0.652	0.018	2		0.2155	0.0725	2		0.0805	0.0215	2		0.52	0.021	2			13.85		0.7055	0.0365	2		0.62	0.005	2		0.7385	0.0105	2		0.617	0.035	2		0.603
13.867		0.777	0.017	2		0.497	0.135	2		0.6175	0.0125	2		0.652	0.019	2		0.2175	0.0735	2		0.0795	0.0215	2		0.519	0.022	2			13.867		0.705	0.037	2		0.622	0.007	2		0.739	0.013	2		0.6155	0.0345	2		0.6045
13.883		0.779	0.017	2		0.496	0.135	2		0.618	0.012	2		0.6495	0.0175	2		0.2175	0.0735	2		0.08	0.022	2		0.517	0.023	2			13.883		0.7045	0.0365	2		0.622	0.008	2		0.738	0.012	2		0.6135	0.0355	2		0.602
13.9		0.778	0.019	2		0.4975	0.1335	2		0.615	0.012	2		0.6515	0.0175	2		0.218	0.075	2		0.08	0.022	2		0.5185	0.0215	2			13.9		0.703	0.037	2		0.618	0.004	2		0.739	0.012	2		0.615	0.037	2		0.605
13.917		0.779	0.016	2		0.498	0.133	2		0.6155	0.0115	2		0.649	0.019	2		0.2185	0.0755	2		0.08	0.022	2		0.5185	0.0215	2			13.917		0.705	0.04	2		0.617	0.007	2		0.737	0.013	2		0.616	0.039	2		0.605
13.933		0.78	0.017	2		0.497	0.134	2		0.615	0.012	2		0.6495	0.0195	2		0.2175	0.0745	2		0.0795	0.0225	2		0.5185	0.0215	2			13.933		0.7045	0.0355	2		0.618	0.009	2		0.732	0.012	2		0.613	0.036	2		0.6035
13.95		0.78	0.017	2		0.496	0.133	2		0.615	0.011	2		0.651	0.019	2		0.217	0.075	2		0.0795	0.0215	2		0.519	0.021	2			13.95		0.704	0.038	2		0.622	0.006	2		0.7355	0.0095	2		0.615	0.036	2		0.603
13.967		0.7815	0.0175	2		0.497	0.133	2		0.6155	0.0105	2		0.65	0.019	2		0.2175	0.0755	2		0.0795	0.0215	2		0.518	0.022	2			13.967		0.7035	0.0365	2		0.622	0.009	2		0.739	0.012	2		0.616	0.04	2		0.604
13.983		0.781	0.019	2		0.5005	0.1325	2		0.6145	0.0105	2		0.651	0.019	2		0.2195	0.0775	2		0.0795	0.0215	2		0.5185	0.0215	2			13.983		0.7045	0.0365	2		0.6215	0.0065	2		0.737	0.011	2		0.619	0.042	2		0.6065
14		0.7775	0.0185	2		0.498	0.134	2		0.615	0.01	2		0.6505	0.0185	2		0.2185	0.0755	2		0.079	0.022	2		0.5155	0.0205	2			14		0.7025	0.0355	2		0.6215	0.0065	2		0.7405	0.0115	2		0.6145	0.0385	2		0.603
14.017		0.779	0.019	2		0.4995	0.1315	2		0.613	0.011	2		0.649	0.019	2		0.2205	0.0775	2		0.079	0.022	2		0.516	0.021	2			14.017		0.703	0.035	2		0.6215	0.0065	2		0.74	0.013	2		0.612	0.037	2		0.6045
14.033		0.779	0.017	2		0.496	0.132	2		0.612	0.012	2		0.6495	0.0195	2		0.218	0.076	2		0.0785	0.0215	2		0.5165	0.0215	2			14.033		0.7025	0.0365	2		0.62	0.006	2		0.739	0.012	2		0.6135	0.0365	2		0.603
14.05		0.778	0.017	2		0.497	0.131	2		0.614	0.012	2		0.6485	0.0185	2		0.219	0.077	2		0.079	0.022	2		0.517	0.022	2			14.05		0.704	0.033	2		0.621	0.009	2		0.7375	0.0115	2		0.616	0.038	2		0.6055
14.067		0.7775	0.0165	2		0.496	0.132	2		0.6115	0.0095	2		0.648	0.019	2		0.2175	0.0755	2		0.0795	0.0215	2		0.516	0.023	2			14.067		0.701	0.033	2		0.618	0.005	2		0.737	0.011	2		0.613	0.038	2		0.6025
14.083		0.776	0.016	2		0.4985	0.1305	2		0.614	0.012	2		0.648	0.019	2		0.2195	0.0785	2		0.0785	0.0215	2		0.5155	0.0225	2			14.083		0.702	0.038	2		0.6185	0.0065	2		0.732	0.012	2		0.6175	0.0405	2		0.6025
14.1		0.7735	0.0175	2		0.496	0.132	2		0.6105	0.0115	2		0.647	0.019	2		0.217	0.076	2		0.0785	0.0215	2		0.514	0.02	2			14.1		0.7035	0.0355	2		0.6185	0.0075	2		0.7325	0.0115	2		0.6165	0.0395	2		0.603
14.117		0.7755	0.0185	2		0.4975	0.1305	2		0.611	0.011	2		0.6475	0.0195	2		0.219	0.078	2		0.079	0.022	2		0.5165	0.0215	2			14.117		0.702	0.035	2		0.6185	0.0045	2		0.7355	0.0095	2		0.617	0.04	2		0.6025
14.133		0.7755	0.0185	2		0.4955	0.1305	2		0.613	0.012	2		0.648	0.019	2		0.218	0.076	2		0.078	0.022	2		0.5145	0.0225	2			14.133		0.706	0.037	2		0.621	0.009	2		0.7365	0.0135	2		0.618	0.041	2		0.6035
14.15		0.777	0.015	2		0.496	0.13	2		0.6115	0.0115	2		0.6465	0.0185	2		0.2185	0.0775	2		0.0785	0.0215	2		0.5145	0.0225	2			14.15		0.7005	0.0365	2		0.617	0.004	2		0.739	0.012	2		0.616	0.039	2		0.604
14.167		0.777	0.017	2		0.4975	0.1275	2		0.613	0.013	2		0.6485	0.0185	2		0.22	0.08	2		0.0785	0.0215	2		0.514	0.022	2			14.167		0.7035	0.0345	2		0.6155	0.0035	2		0.735	0.012	2		0.617	0.039	2		0.603
14.183		0.775	0.018	2		0.496	0.129	2		0.6115	0.0115	2		0.6465	0.0195	2		0.218	0.078	2		0.078	0.022	2		0.5135	0.0215	2			14.183		0.7015	0.0365	2		0.619	0.005	2		0.737	0.012	2		0.6145	0.0385	2		0.6025
14.2		0.776	0.016	2		0.5	0.126	2		0.6105	0.0125	2		0.6465	0.0195	2		0.2215	0.0825	2		0.078	0.022	2		0.514	0.021	2			14.2		0.702	0.035	2		0.62	0.009	2		0.737	0.012	2		0.618	0.041	2		0.6045
14.217		0.778	0.016	2		0.498	0.127	2		0.6105	0.0095	2		0.647	0.019	2		0.2205	0.0805	2		0.078	0.022	2		0.514	0.021	2			14.217		0.7015	0.0365	2		0.6175	0.0065	2		0.737	0.012	2		0.6145	0.0375	2		0.6015
14.233		0.7775	0.0155	2		0.4955	0.1285	2		0.611	0.01	2		0.6465	0.0195	2		0.2175	0.0785	2		0.078	0.022	2		0.514	0.022	2			14.233		0.7005	0.0385	2		0.618	0.002	2		0.7355	0.0115	2		0.6155	0.0375	2		0.602
14.25		0.777	0.018	2		0.497	0.127	2		0.609	0.011	2		0.6465	0.0185	2		0.22	0.08	2		0.0775	0.0215	2		0.514	0.021	2			14.25		0.7025	0.0375	2		0.621	0.006	2		0.7345	0.0125	2		0.6195	0.0425	2		0.6025
14.267		0.7775	0.0185	2		0.4965	0.1295	2		0.6095	0.0125	2		0.6425	0.0195	2		0.218	0.079	2		0.078	0.022	2		0.512	0.02	2			14.267		0.701	0.038	2		0.617	0.006	2		0.732	0.012	2		0.615	0.038	2		0.602
14.283		0.779	0.016	2		0.493	0.13	2		0.608	0.011	2		0.6455	0.0195	2		0.2155	0.0775	2		0.0775	0.0215	2		0.512	0.022	2			14.283		0.7005	0.0375	2		0.619	0.009	2		0.7345	0.0105	2		0.6155	0.0405	2		0.6025
14.3		0.776	0.018	2		0.495	0.129	2		0.6075	0.0105	2		0.6445	0.0195	2		0.217	0.078	2		0.0775	0.0215	2		0.5115	0.0225	2			14.3		0.7035	0.0355	2		0.6195	0.0045	2		0.738	0.012	2		0.6195	0.0415	2		0.6045
14.317		0.777	0.017	2		0.4955	0.1295	2		0.609	0.01	2		0.643	0.02	2		0.217	0.078	2		0.0775	0.0215	2		0.5135	0.0225	2			14.317		0.7	0.036	2		0.6205	0.0045	2		0.7325	0.0125	2		0.6145	0.0395	2		0.5995
14.333		0.777	0.016	2		0.4955	0.1285	2		0.609	0.01	2		0.643	0.019	2		0.217	0.079	2		0.0775	0.0215	2		0.5125	0.0215	2			14.333		0.702	0.035	2		0.621	0.007	2		0.7335	0.0125	2		0.6125	0.0375	2		0.6025
14.35		0.7765	0.0185	2		0.4965	0.1295	2		0.608	0.011	2		0.6465	0.0185	2		0.2175	0.0795	2		0.077	0.021	2		0.5115	0.0225	2			14.35		0.702	0.035	2		0.6215	0.0065	2		0.735	0.013	2		0.611	0.036	2		0.6015
14.367		0.777	0.018	2		0.494	0.13	2		0.6075	0.0105	2		0.645	0.02	2		0.2155	0.0775	2		0.077	0.022	2		0.5115	0.0215	2			14.367		0.6995	0.0355	2		0.6205	0.0065	2		0.736	0.012	2		0.615	0.041	2		0.602
14.383		0.7745	0.0155	2		0.4945	0.1285	2		0.6085	0.0115	2		0.6445	0.0195	2		0.2175	0.0785	2		0.0765	0.0215	2		0.5105	0.0215	2			14.383		0.701	0.037	2		0.6195	0.0065	2		0.736	0.013	2		0.6175	0.0425	2		0.601
14.4		0.776	0.018	2		0.4945	0.1275	2		0.607	0.012	2		0.644	0.019	2		0.2175	0.0795	2		0.0765	0.0215	2		0.51	0.022	2			14.4		0.7035	0.0365	2		0.6205	0.0055	2		0.7345	0.0115	2		0.6175	0.0425	2		0.6005
14.417		0.7765	0.0165	2		0.494	0.129	2		0.6065	0.0095	2		0.6435	0.0195	2		0.216	0.078	2		0.0765	0.0215	2		0.509	0.022	2			14.417		0.703	0.036	2		0.6225	0.0075	2		0.735	0.013	2		0.6065	0.0315	2		0.602
14.433		0.776	0.019	2		0.4945	0.1255	2		0.6055	0.0095	2		0.643	0.019	2		0.2175	0.0815	2		0.0765	0.0215	2		0.51	0.023	2			14.433		0.7015	0.0325	2		0.617	0.007	2		0.736	0.012	2		0.6125	0.0375	2		0.6
14.45		0.7755	0.0175	2		0.493	0.128	2		0.6075	0.0115	2		0.6425	0.0195	2		0.2165	0.0785	2		0.0765	0.0215	2		0.51	0.022	2			14.45		0.7035	0.0335	2		0.619	0.005	2		0.7355	0.0115	2		0.612	0.038	2		0.6
14.467		0.7755	0.0175	2		0.493	0.129	2		0.6065	0.0105	2		0.6415	0.0205	2		0.216	0.078	2		0.076	0.021	2		0.5085	0.0205	2			14.467		0.6995	0.0375	2		0.6185	0.0055	2		0.7345	0.0125	2		0.6135	0.0385	2		0.601
14.483		0.7725	0.0195	2		0.494	0.127	2		0.608	0.01	2		0.6425	0.0195	2		0.2175	0.0795	2		0.0765	0.0215	2		0.51	0.023	2			14.483		0.701	0.037	2		0.622	0.006	2		0.7355	0.0125	2		0.6145	0.0395	2		0.601
14.5		0.773	0.018	2		0.4945	0.1265	2		0.606	0.011	2		0.6425	0.0195	2		0.2175	0.0805	2		0.076	0.022	2		0.509	0.022	2			14.5		0.6995	0.0355	2		0.617	0.006	2		0.737	0.012	2		0.6135	0.0385	2		0.602
14.517		0.7725	0.0215	2		0.494	0.126	2		0.6055	0.0125	2		0.642	0.019	2		0.217	0.08	2		0.0755	0.0215	2		0.5095	0.0215	2			14.517		0.6995	0.0355	2		0.6185	0.0055	2		0.7295	0.0125	2		0.6095	0.0365	2		0.6
14.533		0.7745	0.0195	2		0.492	0.127	2		0.606	0.011	2		0.6435	0.0185	2		0.216	0.078	2		0.0765	0.0215	2		0.5105	0.0225	2			14.533		0.7005	0.0345	2		0.6185	0.0045	2		0.7305	0.0125	2		0.6155	0.0405	2		0.602
14.55		0.776	0.019	2		0.4935	0.1265	2		0.606	0.011	2		0.64	0.019	2		0.217	0.08	2		0.0765	0.0215	2		0.509	0.022	2			14.55		0.7015	0.0355	2		0.6155	0.0055	2		0.7315	0.0125	2		0.6135	0.0405	2		0.6005
14.567		0.7745	0.0195	2		0.4945	0.1265	2		0.6065	0.0105	2		0.639	0.02	2		0.2175	0.0805	2		0.076	0.022	2		0.509	0.022	2			14.567		0.7	0.033	2		0.619	0.006	2		0.7325	0.0125	2		0.6125	0.0385	2		0.6
14.583		0.7775	0.0195	2		0.4965	0.1245	2		0.605	0.011	2		0.641	0.02	2		0.2195	0.0825	2		0.0755	0.0215	2		0.507	0.024	2			14.583		0.698	0.034	2		0.618	0.008	2		0.7325	0.0125	2		0.617	0.043	2		0.599
14.6		0.7755	0.0185	2		0.496	0.125	2		0.6045	0.0115	2		0.6425	0.0195	2		0.219	0.082	2		0.0755	0.0215	2		0.5065	0.0235	2			14.6		0.7015	0.0335	2		0.6175	0.0085	2		0.7345	0.0125	2		0.612	0.037	2		0.599
14.617		0.776	0.019	2		0.494	0.125	2		0.6035	0.0125	2		0.639	0.02	2		0.218	0.081	2		0.075	0.021	2		0.5085	0.0235	2			14.617		0.7015	0.0325	2		0.616	0.008	2		0.737	0.012	2		0.612	0.039	2		0.601
14.633		0.7745	0.0195	2		0.4935	0.1235	2		0.603	0.012	2		0.6395	0.0205	2		0.2185	0.0815	2		0.0755	0.0215	2		0.507	0.023	2			14.633		0.703	0.033	2		0.619	0.007	2		0.736	0.012	2		0.611	0.039	2		0.598
14.65		0.7755	0.0185	2		0.497	0.125	2		0.602	0.012	2		0.64	0.02	2		0.219	0.083	2		0.0755	0.0215	2		0.5065	0.0225	2			14.65		0.6985	0.0335	2		0.616	0.009	2		0.735	0.012	2		0.613	0.04	2		0.596
14.667		0.7745	0.0175	2		0.497	0.125	2		0.602	0.012	2		0.639	0.019	2		0.2195	0.0825	2		0.0755	0.0215	2		0.505	0.021	2			14.667		0.7005	0.0335	2		0.6185	0.0085	2		0.735	0.013	2		0.612	0.039	2		0.5995
14.683		0.7745	0.0165	2		0.4965	0.1255	2		0.6015	0.0105	2		0.64	0.019	2		0.219	0.082	2		0.0755	0.0215	2		0.5055	0.0215	2			14.683		0.7005	0.0315	2		0.6175	0.0055	2		0.736	0.013	2		0.6145	0.0415	2		0.5975
14.7		0.7745	0.0185	2		0.4965	0.1245	2		0.602	0.01	2		0.64	0.019	2		0.219	0.083	2		0.0755	0.0215	2		0.5065	0.0225	2			14.7		0.7	0.032	2		0.6185	0.0075	2		0.7355	0.0105	2		0.6175	0.0395	2		0.5985
14.717		0.773	0.019	2		0.497	0.125	2		0.602	0.009	2		0.638	0.02	2		0.219	0.083	2		0.075	0.021	2		0.505	0.021	2			14.717		0.6995	0.0325	2		0.6195	0.0045	2		0.7345	0.0125	2		0.613	0.036	2		0.599
14.733		0.7715	0.0195	2		0.492	0.124	2		0.602	0.011	2		0.637	0.019	2		0.217	0.08	2		0.075	0.022	2		0.503	0.022	2			14.733		0.7005	0.0345	2		0.616	0.007	2		0.736	0.012	2		0.6115	0.0385	2		0.6005
14.75		0.7735	0.0175	2		0.495	0.124	2		0.6015	0.0115	2		0.636	0.019	2		0.219	0.082	2		0.075	0.022	2		0.505	0.022	2			14.75		0.699	0.036	2		0.618	0.006	2		0.737	0.012	2		0.6105	0.0375	2		0.599
14.767		0.7755	0.0175	2		0.493	0.125	2		0.601	0.01	2		0.637	0.02	2		0.2165	0.0805	2		0.0745	0.0215	2		0.5045	0.0225	2			14.767		0.701	0.034	2		0.616	0.008	2		0.7375	0.0125	2		0.611	0.039	2		0.5985
14.783		0.7725	0.0195	2		0.495	0.124	2		0.6005	0.0085	2		0.6385	0.0195	2		0.2185	0.0825	2		0.0745	0.0215	2		0.503	0.02	2			14.783		0.7005	0.0355	2		0.6185	0.0065	2		0.7365	0.0135	2		0.6155	0.0425	2		0.6005
14.8		0.776	0.019	2		0.4935	0.1245	2		0.6005	0.0115	2		0.6385	0.0195	2		0.217	0.082	2		0.0745	0.0215	2		0.503	0.022	2			14.8		0.7035	0.0355	2		0.618	0.009	2		0.736	0.013	2		0.6105	0.0375	2		0.5975
14.817		0.7735	0.0175	2		0.494	0.124	2		0.6015	0.0115	2		0.6375	0.0185	2		0.218	0.082	2		0.0745	0.0215	2		0.505	0.023	2			14.817		0.6995	0.0365	2		0.617	0.007	2		0.738	0.012	2		0.613	0.04	2		0.5985
14.833		0.775	0.019	2		0.495	0.124	2		0.6015	0.0115	2		0.6355	0.0195	2		0.219	0.083	2		0.074	0.021	2		0.5025	0.0235	2			14.833		0.6975	0.0335	2		0.6185	0.0075	2		0.7355	0.0115	2		0.612	0.04	2		0.5985
14.85		0.775	0.018	2		0.4955	0.1235	2		0.6005	0.0105	2		0.6355	0.0205	2		0.219	0.083	2		0.074	0.021	2		0.502	0.023	2			14.85		0.695	0.034	2		0.618	0.007	2		0.729	0.013	2		0.614	0.043	2		0.6025
14.867		0.775	0.019	2		0.4925	0.1245	2		0.6015	0.0095	2		0.6355	0.0195	2		0.2165	0.0815	2		0.0745	0.0215	2		0.503	0.023	2			14.867		0.7015	0.0365	2		0.616	0.007	2		0.7305	0.0135	2		0.614	0.043	2		0.599
14.883		0.773	0.018	2		0.495	0.123	2		0.5995	0.0095	2		0.635	0.02	2		0.2195	0.0825	2		0.0745	0.0215	2		0.503	0.023	2			14.883		0.7	0.034	2		0.6155	0.0065	2		0.733	0.012	2		0.6135	0.0415	2		0.5965
14.9		0.774	0.018	2		0.4935	0.1255	2		0.601	0.011	2		0.633	0.02	2		0.217	0.081	2						0.5015	0.0205	2			14.9		0.6975	0.0375	2		0.6205	0.0085	2		0.7355	0.0125	2		0.613	0.042	2		0.5975
14.917		0.774	0.019	2		0.4935	0.1225	2		0.5985	0.0105	2		0.635	0.019	2		0.218	0.083	2						0.5005	0.0215	2			14.917		0.6985	0.0355	2		0.6175	0.0085	2		0.7325	0.0125	2		0.6085	0.0365	2		0.598
14.933		0.774	0.018	2		0.4945	0.1245	2		0.599	0.011	2		0.6365	0.0195	2		0.217	0.083	2						0.502	0.022	2			14.933		0.697	0.034	2		0.6155	0.0085	2		0.735	0.012	2		0.611	0.039	2		0.6005
14.95		0.7735	0.0185	2		0.4915	0.1245	2		0.5995	0.0105	2		0.6355	0.0195	2		0.216	0.081	2						0.5025	0.0235	2			14.95		0.6995	0.0375	2		0.619	0.009	2		0.7305	0.0125	2		0.6035	0.0325	2		0.597
14.967		0.7725	0.0205	2		0.4935	0.1245	2		0.599	0.009	2		0.638	0.019	2		0.2175	0.0815	2						0.5015	0.0225	2			14.967		0.7	0.034	2		0.6195	0.0075	2		0.7315	0.0125	2		0.612	0.042	2		0.5965
14.983		0.775	0.02	2		0.4925	0.1245	2		0.5985	0.0105	2		0.637	0.02	2										0.501	0.023	2			14.983		0.6985	0.0345	2		0.616	0.004	2		0.7325	0.0125	2		0.611	0.04	2		0.6
15						0.493	0.124	2						0.6345	0.0185	2										0.5	0.022	2			15		0.698	0.034	2		0.616	0.008	2		0.7335	0.0125	2		0.613	0.042	2		0.598
[truncated: 2 more columns]
