# Supplementary material for: Distinct architectural requirements for the parS centromeric sequence of the pSM19035 plasmid partition machinery
Source: eLife. 2022 Sep 5;11:e79480. doi: 10.7554/eLife.79480 (PMC9499535; doi:10.7554/eLife.79480)
Supplement: Figure 2—source data 1. [file elife-79480-fig2-data1.xlsx]

## Sheet: Fig 2B
Figure 2B
		ATP buffer wash				nsDNA wash				ParB wash				ParB-3RparS wash				ParB-4RparS wash				ParB-7RparS wash
Time(min)		Mean	SEM	n		Mean	SEM	n		Mean	SEM	n		Mean	SEM	n		Mean	SEM	n		Mean	SEM	n
0		1	0	3		1	0	3		0.99134	0.00468447	4		1	0	3		0.99956	0.000439744	5		0.999441	0.000559138	6
0.017		0.983086	0.00202204	3		0.949812	0.0229626	3		0.994758	0.00346931	4		0.985467	0.00525885	3		0.986602	0.00283813	5		0.99443	0.00183609	6
0.033		0.988637	0.0006803	3		0.9489	0.024023	3		0.987387	0.00202626	4		0.975621	0.00807591	3		0.986734	0.00386486	5		0.992314	0.00283055	6
0.05		0.978067	0.00808129	3		0.949024	0.018941	3		0.98796	0.00671765	4		0.968925	0.011286	3		0.988192	0.00334424	5		0.98847	0.00361534	6
0.067		0.973958	0.00501531	3		0.943709	0.0208067	3		0.98248	0.00696268	4		0.962644	0.00351198	3		0.983868	0.00450814	5		0.983755	0.00168548	6
0.083		0.977548	0.00235688	3		0.927508	0.0172276	3		0.9758	0.00906563	4		0.95885	0.0108328	3		0.969885	0.00763708	5		0.977747	0.0023715	6
0.1		0.975394	0.0053587	3		0.926639	0.0217631	3		0.969326	0.00928056	4		0.959883	0.00985775	3		0.966727	0.00830028	5		0.979014	0.00483376	6
0.117		0.968301	0.00469418	3		0.923657	0.021862	3		0.969972	0.0101655	4		0.951935	0.00990509	3		0.96642	0.00967639	5		0.972883	0.005145	6
0.133		0.973387	0.0065798	3		0.921657	0.0245135	3		0.967005	0.00741953	4		0.947517	0.00888212	3		0.955015	0.00933791	5		0.963712	0.00264519	6
0.15		0.972758	0.00800273	3		0.918855	0.0209638	3		0.960721	0.00725704	4		0.946313	0.0115286	3		0.947581	0.00969607	5		0.952743	0.00482645	6
0.167		0.971282	0.00585434	3		0.916784	0.0220832	3		0.964559	0.00487172	4		0.943807	0.0102134	3		0.937845	0.0118578	5		0.939831	0.00235738	6
0.183		0.96939	0.00845828	3		0.913602	0.0241272	3		0.96302	0.00660649	4		0.941441	0.00834655	3		0.926615	0.0135795	5		0.927722	0.00419909	6
0.2		0.965373	0.00550852	3		0.910645	0.0232269	3		0.957658	0.00730473	4		0.944774	0.00843913	3		0.917079	0.0129135	5		0.917532	0.00406	6
0.217		0.969555	0.00788265	3		0.909087	0.0234454	3		0.952794	0.00697637	4		0.942404	0.0109215	3		0.898412	0.0160765	5		0.903753	0.00619005	6
0.233		0.968979	0.00738913	3		0.909485	0.0239689	3		0.957407	0.00609699	4		0.930041	0.015919	3		0.882385	0.0174555	5		0.885866	0.00571949	6
0.25		0.967822	0.00707446	3		0.907288	0.0210677	3		0.95288	0.00459843	4		0.930972	0.0131697	3		0.862102	0.019212	5		0.870186	0.00669861	6
0.267		0.963256	0.00872265	3		0.904645	0.0215363	3		0.952498	0.00868395	4		0.931366	0.00924101	3		0.843441	0.0195604	5		0.852584	0.0101024	6
0.283		0.962675	0.00803573	3		0.904698	0.0234801	3		0.94862	0.00836704	4		0.932583	0.0133703	3		0.822822	0.0215411	5		0.835301	0.0109321	6
0.3		0.958904	0.0101149	3		0.89363	0.0191896	3		0.953835	0.00722545	4		0.920094	0.0173958	3		0.805209	0.0232562	5		0.816574	0.011527	6
0.317		0.960097	0.00963603	3		0.894755	0.0218811	3		0.94847	0.00820405	4		0.922835	0.0156399	3		0.785754	0.0248753	5		0.79206	0.0135777	6
0.333		0.96422	0.00871325	3		0.899395	0.0226802	3		0.947737	0.00979827	4		0.922252	0.0160883	3		0.767231	0.0263858	5		0.772343	0.0167434	6
0.35		0.9566	0.0105842	3		0.893293	0.0233112	3		0.949908	0.00887387	4		0.922787	0.00802587	3		0.742393	0.0264518	5		0.753726	0.0197457	6
0.367		0.9572	0.00902165	3		0.892211	0.0209426	3		0.942304	0.0112499	4		0.91443	0.0126767	3		0.722913	0.0264137	5		0.735144	0.0181434	6
0.383		0.959292	0.010357	3		0.88939	0.023131	3		0.941147	0.00971579	4		0.907903	0.0122065	3		0.702908	0.0285076	5		0.714461	0.0200614	6
0.4		0.959329	0.00809151	3		0.88621	0.0189887	3		0.942332	0.0104484	4		0.919762	0.0100454	3		0.68092	0.0275455	5		0.701398	0.0219661	6
0.417		0.959371	0.00996549	3		0.880326	0.0199066	3		0.938627	0.00977748	4		0.917047	0.0129966	3		0.660638	0.0286459	5		0.683498	0.0254482	6
0.433		0.957847	0.00805103	3		0.878544	0.0220144	3		0.939777	0.00784255	4		0.912594	0.0145176	3		0.642018	0.0291359	5		0.651218	0.027899	6
0.45		0.960626	0.00780198	3		0.88341	0.0220067	3		0.934058	0.00940438	4		0.908061	0.0152274	3		0.623976	0.0300401	5		0.633111	0.0304244	6
0.467		0.953752	0.0078767	3		0.877261	0.0193485	3		0.930109	0.0117484	4		0.907592	0.0119499	3		0.60671	0.030211	5		0.613429	0.0318349	6
0.483		0.955817	0.00725109	3		0.873574	0.0220738	3		0.933231	0.0123352	4		0.905983	0.0144193	3		0.592755	0.0349325	5		0.5958	0.033208	6
0.5		0.956978	0.00985359	3		0.876192	0.0212972	3		0.932278	0.0118039	4		0.90107	0.0134376	3		0.577196	0.0374166	5		0.576184	0.0365416	6
0.517		0.956026	0.0122626	3		0.869203	0.0193932	3		0.926562	0.0104522	4		0.903412	0.0100293	3		0.550285	0.0299495	5		0.559907	0.037502	6
0.533		0.958572	0.00893646	3		0.868789	0.0201146	3		0.924665	0.0120369	4		0.903808	0.0130548	3		0.531602	0.0301759	5		0.540933	0.0384994	6
0.55		0.962379	0.00972487	3		0.87359	0.021764	3		0.918096	0.0124829	4		0.896269	0.0177425	3		0.513888	0.0287085	5		0.525614	0.0397692	6
0.567		0.954351	0.00935721	3		0.864345	0.0194013	3		0.918046	0.0108625	4		0.897715	0.0168427	3		0.497414	0.0286039	5		0.510229	0.0406646	6
0.583		0.956265	0.0114125	3		0.872442	0.0256069	3		0.918975	0.0115827	4		0.898353	0.0144055	3		0.484796	0.0284074	5		0.494089	0.0421974	6
0.6		0.947882	0.00825903	3		0.864641	0.0190329	3		0.914454	0.0128787	4		0.882155	0.016596	3		0.464321	0.0292402	5		0.475725	0.0432141	6
0.617		0.950937	0.0143048	3		0.859725	0.0192845	3		0.910258	0.0123602	4		0.900004	0.017161	3		0.447654	0.0288593	5		0.46033	0.0433801	6
0.633		0.949985	0.0124543	3		0.86296	0.023351	3		0.90857	0.0116566	4		0.891265	0.014298	3		0.435178	0.0304155	5		0.447606	0.0448901	6
0.65		0.951386	0.00919152	3		0.861267	0.0202676	3		0.90893	0.014635	4		0.887311	0.0186379	3		0.416596	0.0280266	5		0.434584	0.0456785	6
0.667		0.947924	0.00804691	3		0.857416	0.0203087	3		0.904319	0.012137	4		0.886409	0.0133663	3		0.405157	0.0272462	5		0.420445	0.0478471	6
0.683		0.946927	0.0112582	3		0.852097	0.016875	3		0.905207	0.0119598	4		0.888251	0.0181735	3		0.390652	0.0272123	5		0.404837	0.0485264	6
0.7		0.954264	0.0063345	3		0.856655	0.0225343	3		0.898347	0.0160997	4		0.881083	0.0136571	3		0.37606	0.0262562	5		0.392937	0.0494278	6
0.717		0.951708	0.012295	3		0.848553	0.018566	3		0.899673	0.0169437	4		0.889454	0.0153112	3		0.362958	0.027175	5		0.377462	0.0498558	6
0.733		0.951646	0.0100376	3		0.847686	0.0195908	3		0.895624	0.0142539	4		0.88174	0.0172328	3		0.352098	0.0254286	5		0.362771	0.051238	6
0.75		0.951316	0.0100751	3		0.845012	0.0207791	3		0.892377	0.0146382	4		0.882439	0.0159125	3		0.335295	0.0253545	5		0.353046	0.0511623	6
0.767		0.952995	0.00982559	3		0.849624	0.0198809	3		0.893263	0.0143708	4		0.879832	0.0170172	3		0.327505	0.0243967	5		0.338533	0.0526486	6
0.783		0.946489	0.00826996	3		0.845133	0.0200496	3		0.885933	0.0164588	4		0.873989	0.0149992	3		0.316016	0.0232607	5		0.32636	0.0530869	6
0.8		0.964303	0.00454002	3		0.844858	0.0213089	3		0.885224	0.0148553	4		0.874544	0.0160607	3		0.304327	0.0240902	5		0.315029	0.055066	6
0.817		0.959519	0.00728949	3		0.842325	0.019445	3		0.887461	0.0159085	4		0.875024	0.0173526	3		0.294334	0.0231996	5		0.301518	0.0550135	6
0.833		0.945692	0.00788572	3		0.843959	0.0210676	3		0.879926	0.0163146	4		0.87013	0.0167799	3		0.281226	0.0221965	5		0.293974	0.0553533	6
0.85		0.944485	0.00931859	3		0.846526	0.0239617	3		0.879051	0.0152731	4		0.868204	0.0199715	3		0.275039	0.0218558	5		0.284341	0.0548727	6
0.867		0.943037	0.0107988	3		0.846424	0.0197836	3		0.876969	0.0141568	4		0.868952	0.0179122	3		0.263428	0.0219245	5		0.274997	0.0559821	6
0.883		0.950098	0.0089884	3		0.838133	0.0190776	3		0.872479	0.0149762	4		0.863315	0.0190785	3		0.253812	0.0207019	5		0.265612	0.0543953	6
0.9		0.940956	0.00758409	3		0.834446	0.0193293	3		0.864518	0.0167668	4		0.861604	0.0179016	3		0.244898	0.0209562	5		0.255634	0.0539564	6
0.917		0.94224	0.00430398	3		0.838273	0.0213812	3		0.867371	0.0153941	4		0.860111	0.0159171	3		0.236157	0.0191478	5		0.248313	0.0541851	6
0.933		0.946146	0.0087014	3		0.834252	0.017376	3		0.870994	0.0168072	4		0.858439	0.0179817	3		0.228929	0.0189835	5		0.239816	0.0537302	6
0.95		0.950855	0.0132563	3		0.832722	0.0223099	3		0.862585	0.0166773	4		0.876539	0.0139938	3		0.221193	0.0183198	5		0.23198	0.0539596	6
0.967		0.947113	0.0106036	3		0.834548	0.0211857	3		0.864105	0.0151145	4		0.875942	0.0101137	3		0.212855	0.0165983	5		0.223936	0.0537423	6
0.983		0.948545	0.00278206	3		0.828927	0.018372	3		0.857975	0.013681	4		0.886021	0.0125377	3		0.205214	0.0169152	5		0.217803	0.0527947	6
1		0.951859	0.0106657	3		0.83272	0.0228704	3		0.855838	0.0174416	4		0.858116	0.0158946	3		0.197655	0.0173269	5		0.211477	0.0532863	6
1.017		0.949945	0.00898705	3		0.824108	0.0178628	3		0.85297	0.0141734	4		0.854227	0.0201429	3		0.19136	0.0163857	5		0.204003	0.0515567	6
1.033		0.944816	0.00555091	3		0.823359	0.0172888	3		0.849589	0.0198113	4		0.8527	0.0135069	3		0.18531	0.0157341	5		0.194829	0.0502237	6
1.05		0.952903	0.00762528	3		0.828517	0.0234395	3		0.842516	0.0160808	4		0.850797	0.0181463	3		0.178207	0.0162196	5		0.190453	0.0500749	6
1.067		0.949875	0.00400847	3		0.828291	0.019335	3		0.85019	0.0167122	4		0.857665	0.0158394	3		0.170118	0.0153954	5		0.1833	0.0499363	6
1.083		0.946347	0.00675574	3		0.822281	0.019255	3		0.844241	0.0165057	4		0.849325	0.0172038	3		0.163847	0.0142434	5		0.177602	0.0483966	6
1.1		0.950757	0.00831118	3		0.821233	0.019975	3		0.843023	0.018121	4		0.855521	0.0188412	3		0.159639	0.0135061	5		0.171624	0.0483921	6
1.117		0.952993	0.0104653	3		0.821306	0.0202681	3		0.840067	0.0174777	4		0.849872	0.0179358	3		0.1542	0.0135533	5		0.166942	0.0479657	6
1.133		0.946631	0.00870379	3		0.816641	0.0184892	3		0.835581	0.0161349	4		0.848653	0.0165388	3		0.149719	0.013089	5		0.160836	0.0472972	6
1.15		0.945	0.00709436	3		0.812747	0.019172	3		0.83335	0.0157765	4		0.836763	0.0169341	3		0.1428	0.0124336	5		0.155958	0.0461591	6
1.167		0.949439	0.00723526	3		0.818385	0.0218166	3		0.833893	0.0193891	4		0.836177	0.0172336	3		0.137168	0.0125367	5		0.151833	0.0455371	6
1.183		0.94707	0.00799408	3		0.816369	0.0198374	3		0.830016	0.0198518	4		0.839928	0.0159518	3		0.132918	0.0120983	5		0.14609	0.0450221	6
1.2		0.948827	0.0056536	3		0.810616	0.0186898	3		0.823065	0.0157617	4		0.830918	0.0170711	3		0.129373	0.0117841	5		0.142577	0.0443708	6
1.217		0.948778	0.00691886	3		0.808143	0.0180122	3		0.817376	0.0175424	4		0.831845	0.0167041	3		0.125055	0.0104917	5		0.138389	0.0434411	6
1.233		0.941046	0.00574453	3		0.815312	0.0224926	3		0.820405	0.0182709	4		0.832989	0.0158517	3		0.119381	0.010532	5		0.133307	0.0422914	6
1.25		0.944582	0.00473014	3		0.81225	0.0209295	3		0.819641	0.0182101	4		0.830829	0.0167377	3		0.115386	0.0104752	5		0.131026	0.0425038	6
1.267		0.945559	0.00929605	3		0.810532	0.0185094	3		0.818861	0.0202402	4		0.830574	0.0181059	3		0.111903	0.00971538	5		0.126124	0.0410159	6
1.283		0.947363	0.0136443	3		0.809223	0.0192983	3		0.815801	0.0161364	4		0.82756	0.0165791	3		0.107795	0.00901307	5		0.122248	0.0408887	6
1.3		0.954661	0.0207002	3		0.81135	0.0195443	3		0.814442	0.0181845	4		0.826414	0.0158794	3		0.105316	0.00850347	5		0.119488	0.0400047	6
1.317		0.947591	0.0154046	3		0.807848	0.0189073	3		0.812639	0.0157865	4		0.830455	0.0183263	3		0.101796	0.00855116	5		0.116151	0.0397252	6
1.333		0.938111	0.00807453	3		0.806496	0.0204104	3		0.807692	0.0168956	4		0.825059	0.0201329	3		0.0989405	0.00833976	5		0.112876	0.0390194	6
1.35		0.938787	0.0119495	3		0.805735	0.0205776	3		0.808088	0.0186213	4		0.824368	0.0202192	3		0.0950804	0.00811402	5		0.108659	0.0378335	6
1.367		0.941226	0.00841918	3		0.804002	0.0180907	3		0.804405	0.0163247	4		0.819292	0.0165227	3		0.0923682	0.00781601	5		0.104893	0.0372593	6
1.383		0.94105	0.00920674	3		0.798418	0.017238	3		0.803431	0.0187182	4		0.823519	0.0190776	3		0.0885538	0.00769445	5		0.101783	0.0360263	6
1.4		0.941136	0.00712498	3		0.79797	0.0185108	3		0.797734	0.0175384	4		0.816487	0.0210658	3		0.0859283	0.00688891	5		0.0990632	0.0356173	6
1.417		0.932761	0.0127335	3		0.795377	0.0175804	3		0.805403	0.0197073	4		0.824276	0.0198162	3		0.0837414	0.00606071	5		0.095601	0.0348548	6
1.433		0.934104	0.0100402	3		0.79765	0.0206183	3		0.800603	0.0194566	4		0.812188	0.0215162	3		0.080913	0.00629028	5		0.0933965	0.0345463	6
1.45		0.93713	0.0113621	3		0.794636	0.0191264	3		0.794277	0.019903	4		0.81238	0.018265	3		0.0780472	0.00617728	5		0.0898416	0.0333677	6
1.467		0.938533	0.0058496	3		0.792982	0.0193499	3		0.792301	0.0187423	4		0.816725	0.0224182	3		0.0752532	0.0058325	5		0.0885907	0.0336667	6
1.483		0.941008	0.0067971	3		0.788703	0.0173154	3		0.793218	0.0186488	4		0.815629	0.0205227	3		0.0716698	0.00662482	5		0.0857645	0.0330028	6
1.5		0.940843	0.00644977	3		0.798317	0.0227664	3		0.783888	0.0185821	4		0.814703	0.016269	3		0.0706319	0.00557493	5		0.083507	0.0319795	6
1.517		0.936274	0.0117146	3		0.790848	0.0174604	3		0.784802	0.0198202	4		0.807214	0.0170512	3		0.0677094	0.0052244	5		0.0796702	0.030324	6
1.533		0.939362	0.0029974	3		0.788296	0.0186591	3		0.780816	0.0195907	4		0.803073	0.0208377	3		0.0647587	0.00539812	5		0.0773008	0.029259	6
1.55		0.933569	0.0108054	3		0.789069	0.0185812	3		0.782389	0.0198427	4		0.803183	0.0198424	3		0.0652745	0.00489704	5		0.0751197	0.0284179	6
1.567		0.938114	0.00924027	3		0.790324	0.0199651	3		0.778886	0.0195552	4		0.806902	0.0199611	3		0.0624097	0.00494862	5		0.072372	0.0281062	6
1.583		0.935551	0.0090154	3		0.788119	0.0181685	3		0.774492	0.0193883	4		0.804671	0.0176444	3		0.0595653	0.00449843	5		0.0709459	0.0279089	6
1.6		0.937763	0.00675617	3		0.785308	0.0172439	3		0.775519	0.0178676	4		0.80575	0.0226108	3		0.0579908	0.00487838	5		0.0683215	0.0277366	6
1.617		0.935931	0.0101064	3		0.782329	0.0176015	3		0.769657	0.0199372	4		0.801206	0.0213441	3		0.0567112	0.00427983	5		0.0665306	0.0264351	6
1.633		0.935053	0.0140693	3		0.791936	0.0224303	3		0.769291	0.0181543	4		0.797714	0.0187015	3		0.054643	0.00439867	5		0.0645532	0.0263327	6
1.65		0.932996	0.0105955	3		0.785345	0.0205733	3		0.76834	0.0189639	4		0.802843	0.0180102	3		0.0520903	0.00465389	5		0.0629598	0.0255499	6
1.667		0.931864	0.0114	3		0.783409	0.0201881	3		0.760814	0.0174645	4		0.800461	0.0220047	3		0.0502123	0.00516168	5		0.060907	0.0247793	6
1.683		0.930034	0.00920821	3		0.785922	0.0208137	3		0.766477	0.0187106	4		0.800877	0.0184312	3		0.0490871	0.00403497	5		0.0591419	0.0237272	6
1.7		0.929742	0.0104782	3		0.784677	0.0215886	3		0.760142	0.0186889	4		0.793684	0.0181105	3		0.0483831	0.00399987	5		0.0577653	0.0236697	6
1.717		0.93374	0.0083776	3		0.779814	0.0186415	3		0.757914	0.0205904	4		0.795349	0.0233576	3		0.0463942	0.00365714	5		0.0554739	0.0230493	6
1.733		0.934817	0.0071919	3		0.781559	0.019838	3		0.758751	0.0160851	4		0.790842	0.0196165	3		0.0448219	0.00426493	5		0.0545091	0.0225591	6
1.75		0.927644	0.00917002	3		0.773462	0.0180849	3		0.751516	0.0205222	4		0.790944	0.020783	3		0.0436512	0.00369709	5		0.0533621	0.0221858	6
1.767		0.936651	0.00585101	3		0.777247	0.0197234	3		0.748655	0.0178593	4		0.789718	0.021281	3		0.0427498	0.00362469	5		0.0516734	0.0215283	6
1.783		0.935436	0.0107069	3		0.772188	0.0180478	3		0.752408	0.0182753	4		0.791252	0.0217516	3		0.0418126	0.0034823	5		0.050796	0.0209683	6
1.8		0.935142	0.00772546	3		0.772688	0.0191273	3		0.743357	0.0194947	4		0.787972	0.0231191	3		0.0399419	0.00323226	5		0.0498968	0.0209742	6
1.817		0.931589	0.0109097	3		0.774873	0.0233191	3		0.744982	0.0208013	4		0.782112	0.0211403	3		0.0386946	0.00342367	5		0.0479189	0.0196067	6
1.833		0.931011	0.0075466	3		0.764269	0.0171827	3		0.739357	0.0194553	4		0.785166	0.0234033	3		0.0369157	0.00341166	5		0.0467961	0.0200377	6
1.85		0.931316	0.0108057	3		0.768104	0.0207082	3		0.737387	0.0178526	4		0.779876	0.0231589	3		0.0361488	0.00341804	5		0.0453736	0.0188312	6
1.867		0.929989	0.00932607	3		0.762098	0.0174489	3		0.735986	0.0207806	4		0.777313	0.0218078	3		0.0344164	0.00392326	5		0.0433875	0.0188957	6
1.883		0.931907	0.0118547	3		0.766513	0.0194766	3		0.735376	0.0212261	4		0.776631	0.0245431	3		0.0333377	0.00361082	5		0.0424752	0.0182986	6
1.9		0.930656	0.00721632	3		0.765347	0.0169889	3		0.733181	0.0190769	4		0.775353	0.017868	3		0.0332923	0.0035152	5		0.0406284	0.0181221	6
1.917		0.923958	0.0090797	3		0.765766	0.0207977	3		0.731229	0.018857	4		0.781549	0.0228876	3		0.0318098	0.00325469	5		0.0409221	0.0174283	6
1.933		0.937762	0.00593091	3		0.761279	0.0166819	3		0.729681	0.0184219	4		0.777599	0.0208577	3		0.0305514	0.00367817	5		0.0400367	0.0172144	6
1.95		0.940802	0.00876421	3		0.762315	0.0176677	3		0.726211	0.0198004	4		0.77902	0.0255014	3		0.0293245	0.00314745	5		0.0384539	0.0165261	6
1.967		0.930425	0.00466386	3		0.764392	0.0191675	3		0.726417	0.0201312	4		0.772392	0.0243102	3		0.0290525	0.00343674	5		0.0383939	0.0162956	6
1.983		0.928634	0.0065402	3		0.761395	0.0210673	3		0.723927	0.0167899	4		0.767213	0.0248637	3		0.0270965	0.00329464	5		0.0366302	0.0162121	6
2		0.929033	0.0102056	3		0.760719	0.0177815	3		0.722919	0.0184882	4		0.767296	0.0220516	3		0.0271617	0.00305081	5		0.0365249	0.0159611	6
2.017		0.92643	0.0123118	3		0.756432	0.0183722	3		0.723681	0.0216073	4		0.763123	0.02542	3		0.0251898	0.00341838	5		0.0345143	0.0158476	6
2.033		0.930601	0.0084598	3		0.758444	0.0194208	3		0.719144	0.0184011	4		0.764476	0.0225397	3		0.0245391	0.00316972	5		0.0342444	0.0150456	6
2.05		0.924693	0.00702975	3		0.757194	0.0196962	3		0.713963	0.0227603	4		0.765825	0.0228627	3		0.0243266	0.00282453	5		0.0335714	0.0148685	6
2.067		0.924972	0.00652584	3		0.758328	0.019152	3		0.710552	0.0198056	4		0.756351	0.0230127	3		0.0230718	0.00312076	5		0.0322971	0.0143079	6
2.083		0.930764	0.00865354	3		0.758079	0.0193215	3		0.711534	0.0224415	4		0.763527	0.0244906	3		0.0207287	0.0040082	5		0.0311702	0.0134709	6
2.1		0.926373	0.00782861	3		0.75158	0.0164676	3		0.704199	0.0221609	4		0.759277	0.0237423	3		0.0201863	0.00396307	5		0.031161	0.0135569	6
2.117		0.92984	0.0105492	3		0.754414	0.0188098	3		0.707837	0.0205858	4		0.75416	0.020771	3		0.01934	0.00395746	5		0.0296156	0.0135939	6
2.133		0.92146	0.0113227	3		0.753122	0.0187511	3		0.70452	0.0219772	4		0.759329	0.0230658	3		0.0175243	0.00395457	4		0.0289865	0.0131903	6
2.15		0.925203	0.0125872	3		0.753322	0.0205074	3		0.698848	0.0219063	4		0.751125	0.0227164	3		0.0165272	0.00392994	4		0.0282402	0.0127082	6
2.167		0.928453	0.00707315	3		0.751568	0.0182347	3		0.702899	0.0192196	4		0.754717	0.0245166	3		0.0166498	0.0037709	4		0.0271443	0.0120461	6
2.183		0.929658	0.00536022	3		0.74658	0.0193483	3		0.698639	0.0206188	4		0.750933	0.0244894	3		0.0186921	0.00294688	3		0.0268279	0.0117336	6
2.2		0.921681	0.00951257	3		0.749793	0.0186317	3		0.697088	0.0206906	4		0.749959	0.0216359	3		0.0181744	0.00320676	3		0.02575	0.0117851	6
2.217		0.924974	0.0129658	3		0.748791	0.0207346	3		0.692146	0.0226547	4		0.742165	0.0243097	3		0.0165871	0.00384778	3		0.0252088	0.0112206	6
2.233		0.92375	0.00771651	3		0.74475	0.0195465	3		0.687961	0.0205284	4		0.745083	0.0248234	3		0.0163173	0.00280811	3		0.024814	0.0113389	6
2.25		0.927433	0.00940543	3		0.748581	0.0207842	3		0.690415	0.0214744	4		0.744639	0.0236435	3		0.0142189	0.0031667	3		0.0237536	0.0110887	6
2.267		0.924435	0.00850158	3		0.746519	0.0195418	3		0.686302	0.0207284	4		0.746277	0.0227752	3		0.0151507	0.00269863	3		0.0230631	0.0105416	6
2.283		0.920131	0.00941575	3		0.742984	0.0175205	3		0.69034	0.0216098	4		0.735499	0.0228023	3		0.0136216	0.00370795	3		0.0233179	0.00986681	6
2.3		0.926215	0.00610724	3		0.738679	0.0166485	3		0.684151	0.0241242	4		0.740419	0.0253534	3		0.0128141	0.00311886	3		0.0219792	0.00968818	6
2.317		0.918171	0.00762592	3		0.744432	0.0204037	3		0.685404	0.0206425	4		0.744504	0.0243344	3		0.0117778	0.0036487	3		0.0215287	0.00947122	6
2.333		0.918218	0.00786724	3		0.737027	0.0173873	3		0.681702	0.0192574	4		0.737349	0.0254619	3		0.0121533	0.00275768	3		0.0207507	0.00968323	6
2.35		0.915449	0.0074906	3		0.73763	0.0203912	3		0.678589	0.0203283	4		0.740802	0.026225	3		0.0147909	0.00166768	2		0.0200688	0.00886897	6
2.367		0.922978	0.00681266	3		0.737525	0.0180128	3		0.678974	0.0233965	4		0.736291	0.0256871	3		0.0152276	0.00105481	2		0.0197328	0.0093616	6
2.383		0.915312	0.0110591	3		0.738967	0.0176662	3		0.676368	0.019758	4		0.735731	0.0264812	3		0.014639	0.00171982	2		0.0196551	0.0086424	6
2.4		0.919089	0.0106285	3		0.740527	0.021755	3		0.671498	0.0205241	4		0.731584	0.0272172	3		0.013742	0.0014674	2		0.019048	0.00805489	6
2.417		0.92252	0.00790604	3		0.736391	0.0167799	3		0.672725	0.02082	4		0.727034	0.0297454	3		0.0136927	0.00145471	2		0.0190729	0.00841515	6
2.433		0.920259	0.00839526	3		0.729105	0.0142231	3		0.671031	0.0191713	4		0.728573	0.025194	3		0.0121164	0.00221743	2		0.0177016	0.00765608	6
2.45		0.922132	0.00380806	3		0.730033	0.0180747	3		0.665965	0.0198814	4		0.727981	0.0280611	3		0.0111266	0.00253606	2		0.017605	0.00742539	6
2.467		0.919959	0.00629119	3		0.734194	0.0183926	3		0.665294	0.0219744	4		0.722966	0.0303136	3		0.0107166	0.0018878	2		0.0173797	0.00754453	6
2.483		0.919756	0.0110172	3		0.738088	0.0199701	3		0.660268	0.0205824	4		0.721775	0.0292721	3		0.0108985	0.0017435	2		0.0167372	0.00755444	6
2.5		0.918877	0.00747195	3		0.73121	0.0156544	3		0.658256	0.0185818	4		0.723242	0.0262478	3		0.0106725	0.00163761	2		0.0163964	0.00730438	6
2.517		0.916914	0.0110889	3		0.730653	0.0183633	3		0.659572	0.0201742	4		0.719167	0.027006	3		0.0103251	0.00114006	2		0.0156765	0.00745839	6
2.533		0.918717	0.00952036	3		0.732527	0.0199065	3		0.655123	0.0212947	4		0.717	0.0288962	3		0.0104875	0.00179848	2		0.0141933	0.00670236	6
2.55		0.917196	0.00523751	3		0.727855	0.0161482	3		0.653401	0.0220343	4		0.718698	0.0259926	3		0.00941597	0.00213952	2		0.0174994	0.00664236	5
2.567		0.914328	0.012023	3		0.727416	0.0186993	3		0.649612	0.0204413	4		0.71884	0.0283521	3		0.00952347	0.00155921	2		0.0158678	0.00709597	5
2.583		0.915134	0.00581187	3		0.731846	0.0189987	3		0.651497	0.0197166	4		0.717737	0.0303719	3		0.00911959	0.00178537	2		0.0150802	0.0069345	5
2.6		0.91439	0.0082715	3		0.724296	0.0181264	3		0.64806	0.018094	4		0.719424	0.0289945	3		0.0108547		1		0.0143251	0.00670589	5
2.617		0.91646	0.009406	3		0.724518	0.0176102	3		0.650895	0.0219769	4		0.715028	0.0305513	3		0.0111556		1		0.0143176	0.00692827	5
2.633		0.918291	0.00573272	3		0.727035	0.0195705	3		0.641174	0.0229168	4		0.716746	0.029592	3		0.00992895		1		0.0137891	0.00655965	5
2.65		0.919475	0.00515553	3		0.727859	0.0208917	3		0.645508	0.0191591	4		0.712492	0.0269738	3		0.0103224		1		0.0146652	0.0070513	4
2.667		0.912824	0.00650776	3		0.726249	0.019711	3		0.642876	0.0210344	4		0.718003	0.0319777	3		0.0107159		1		0.01587	0.00669153	4
2.683		0.919267	0.00866018	3		0.724491	0.0191265	3		0.638491	0.0222162	4		0.710151	0.0301411	3		0.010091		1		0.0148906	0.0068583	4
2.7		0.91607	0.00513988	3		0.726309	0.0228037	3		0.6389	0.0222516	4		0.707944	0.0323609	3		0.00988266		1		0.0182471	0.00665887	3
2.717		0.913242	0.0113237	3		0.752326	0.0357664	3		0.636721	0.0213736	4		0.706432	0.0292936	3		0.00999838		1		0.0193217	0.00651782	3
2.733		0.914206	0.0108816	3		0.726943	0.0218633	3		0.634735	0.0226408	4		0.703476	0.0314205	3		0.00923461		1		0.0174388	0.00621939	3
2.75		0.917071	0.0101593	3		0.717418	0.0186059	3		0.632527	0.0210667	4		0.70669	0.0312142	3		0.00872544		1		0.0179595	0.00661664	3
2.767		0.917992	0.0119964	3		0.722815	0.0200407	3		0.629195	0.0228976	4		0.704579	0.0321537	3		0.00823941		1		0.0181106	0.00660085	3
2.783		0.920816	0.00974715	3		0.723287	0.0167474	3		0.627977	0.0205948	4		0.702746	0.0310693	3		0.00816997		1		0.0209649	0.00483347	3
2.8		0.909361	0.00989309	3		0.718614	0.020172	3		0.625714	0.0216464	4		0.702507	0.0307214	3		0.00828569		1		0.0345197	0.00842451	3
2.817		0.911598	0.00935289	3		0.717746	0.0218867	3		0.626523	0.022657	4		0.700788	0.0312667	3		0.00819312		1		0.0331107	0.0085894	3
2.833		0.910955	0.00738879	3		0.713388	0.0196268	3		0.627996	0.0209453	4		0.695881	0.0305346	3		0.00733677		1		0.014497	0.0058184	3
2.85		0.909907	0.0110397	3		0.711581	0.0201375	3		0.621381	0.0200541	4		0.693305	0.0326175	3		0.00717476		1		0.0152792	0.00508185	3
2.867		0.914395	0.00776724	3		0.711936	0.0193236	3		0.618703	0.0209157	4		0.69107	0.0330826	3		0.00738306		1		0.0149404	0.00488115	3
2.883		0.913388	0.0109357	3		0.710819	0.0222336	3		0.613555	0.0223662	4		0.69328	0.0316332	3		0.00738306		1		0.0145313	0.00455805	3
2.9		0.917988	0.00450459	3		0.711235	0.0209405	3		0.615124	0.0227451	4		0.692052	0.0308035	3		0.00689703		1		0.0205466	0.0030954	2
2.917		0.915759	0.00888543	3		0.710416	0.0196355	3		0.613239	0.0210976	4		0.691044	0.034468	3		0.00636471		1		0.01987	0.00337302	2
2.933		0.912457	0.0103505	3		0.707934	0.0207526	3		0.609694	0.0217411	4		0.685445	0.0346873	3		0.00631842		1		0.0191829	0.00248182	2
2.95		0.915968	0.012312	3		0.70465	0.0177993	3		0.612265	0.0217235	4		0.686369	0.0338714	3		0.00654986		1		0.0177297	0.00248479	2
2.967		0.915304	0.0082926	3		0.70452	0.0198468	3		0.607944	0.0234219	4		0.690697	0.0326592	3		0.00615641		1		0.0177661	0.00259935	2
2.983		0.909156	0.00790806	3		0.70465	0.0194424	3		0.608586	0.0211106	4		0.685511	0.035249	3		0.00664244		1		0.0179584	0.00244311	2
3		0.914306	0.00646995	3		0.705008	0.0202991	3		0.606783	0.0211422	4		0.687099	0.0317746	3		0.00608698		1		0.017655	0.00241494	2
3.017		0.908552	0.00749238	3		0.702428	0.0184935	3		0.602943	0.020471	4		0.686987	0.0336964	3		0.00567038		1		0.0152626	0.00187563	2
3.033		0.908719	0.010176	3		0.704794	0.0214876	3		0.60108	0.0215555	4		0.68819	0.0368435	3		0.00678131		1		0.0152292	0.00137523	2
3.05		0.912783	0.00955841	3		0.700587	0.0198369	3		0.597512	0.0218454	4		0.677888	0.0342261	3		0.00490661		1		0.0153392	0.00178621	2
3.067		0.909972	0.00808771	3		0.69877	0.0181888	3		0.597489	0.0228252	4		0.677291	0.0348253	3		0.00460574		1		0.0156672	0.00222951	2
3.083		0.911912	0.0116228	3		0.699884	0.0199672	3		0.596186	0.0200982	4		0.680453	0.0375965	3		0.00530007		1		0.0151807	0.0018551	2
3.1		0.91152	0.00819969	3		0.697943	0.0193637	3		0.594616	0.023555	4		0.676251	0.0402245	3		0.00539264		1		0.0152447	0.00199894	2
3.117		0.910699	0.00901297	3		0.700104	0.0196141	3		0.591725	0.0206793	4		0.673527	0.0370154	3		0.00481403		1		0.0129299	0.00114364	2
3.133		0.910078	0.00979528	3		0.699661	0.0213072	3		0.591508	0.0204079	4		0.670734	0.0339405	3		0.0049529		1		0.0141693	0.00144488	2
3.15		0.912749	0.00846156	3		0.697875	0.0201126	3		0.59157	0.0188167	4		0.667831	0.0351597	3		0.00405027		1		0.0139281	0.00142594	2
3.167		0.910479	0.0125607	3		0.697329	0.0167471	3		0.584179	0.0200914	4		0.668863	0.0382822	3		0.00418914		1		0.0138297	0.00100827	2
3.183		0.915708	0.0101357	3		0.695648	0.0191475	3		0.583692	0.0204446	4		0.669241	0.0350958	3		0.00455945		1		0.0135423	0.00101606	2
3.2		0.91194	0.00816636	3		0.696716	0.019879	3		0.583364	0.021654	4		0.664507	0.0368035	3		0.00442058		1		0.013262	0.000974519	2
3.217		0.907256	0.0121185	3		0.688931	0.0184916	3		0.584094	0.0205625	4		0.668986	0.0364596	3		0.00421228		1		0.0125055	0.00107235	2
3.233		0.911551	0.0066404	3		0.691604	0.0182566	3		0.582282	0.020451	4		0.663536	0.036622	3		0.00446687		1		0.0120171	0.000857212	2
3.25		0.907436	0.00481045	3		0.693702	0.0218138	3		0.579996	0.0215446	4		0.667975	0.0349966	3		0.00492976		1		0.012376	0.001599	2
3.267		0.91004	0.00709763	3		0.691097	0.0184111	3		0.573951	0.0216473	4		0.663259	0.0359716	3		0.00374939		1		0.0122305	0.00114076	2
3.283		0.908874	0.00691322	3		0.691443	0.0195438	3		0.576897	0.0220821	4		0.660235	0.0374858	3		0.00543893		1		0.0123352	0.0014418	2
3.3		0.913991	0.00657427	3		0.693814	0.0215718	3		0.573007	0.0218239	4		0.661037	0.0372573	3		0.00664244		1		0.0116038	0.00136699	2
3.317		0.907137	0.010289	3		0.686183	0.017687	3		0.571776	0.0225265	4		0.660847	0.0366748	3		0.00573981		1		0.0115005	0.00149444	2
3.333		0.908055	0.00633783	3		0.683646	0.0184032	3		0.572816	0.020107	4		0.660111	0.0374604	3		0.00798482		1		0.0111962	0.00139896	2
3.35		0.907797	0.00712894	3		0.679383	0.0180673	3		0.566924	0.0226534	4		0.662014	0.037932	3		0.00678131		1		0.0102208	0.000448237	2
3.367		0.910342	0.00901709	3		0.680665	0.0168477	3		0.566056	0.0223055	4		0.65605	0.03666	3		0.00611012		1		0.00980748	0.000958016	2
3.383		0.906617	0.0076595	3		0.68321	0.0212744	3		0.565469	0.0221665	4		0.658255	0.0378532	3		0.00638785		1		0.010255	0.00101595	2
3.4		0.913634	0.00647791	3		0.681366	0.0205754	3		0.567142	0.0218343	4		0.655123	0.0374594	3		0.00717476		1		0.00904516	0.000584715	2
3.417		0.912248	0.00892267	3		0.678973	0.0166853	3		0.561021	0.0208963	4		0.651506	0.0378886	3		0.00773023		1		0.00850251	0.00037833	2
3.433		0.907646	0.00542665	3		0.674357	0.0167434	3		0.560059	0.0212228	4		0.650266	0.0357168	3		0.00604069		1		0.00827677	3.41646e-05	2
3.45		0.904305	0.00817803	3		0.676426	0.019146	3		0.553944	0.0219492	4		0.64931	0.0359618	3		0.00597125		1		0.00792513	0.000191991	2
3.467		0.91437	0.0120488	3		0.679407	0.0200909	3		0.557751	0.0202692	4		0.641929	0.0370719	3		0.00629528		1		0.00772504	3.63739e-05	2
3.483		0.914027	0.0104808	3		0.684605	0.020968	3		0.552581	0.0204675	4		0.644086	0.0354355	3		0.00791538		1		0.0074605	0.000324675	2
3.5		0.907067	0.00909253	3		0.677785	0.0201101	3		0.554156	0.0206849	4		0.637038	0.0356936	3		0.00611012		1		0.00919396	0.000363237	2
3.517		0.906598	0.00930843	3		0.67932	0.0208182	3		0.552166	0.0201248	4		0.635921	0.037427	3		0.0068276		1		0.00785951	8.64556e-05	2
3.533		0.905042	0.00990039	3		0.674512	0.0173188	3		0.546056	0.020617	4		0.638306	0.036893	3		0.00530007		1		0.0062037		1
3.55		0.905444	0.00643972	3		0.670076	0.0181696	3		0.540529	0.0205919	4		0.637246	0.0351268	3		0.00428171		1		0.00703704		1
3.567		0.912513	0.00428598	3		0.672545	0.0192962	3		0.546148	0.0201001	4		0.642999	0.0372899	3		0.004328		1		0.00756944		1
3.583		0.903038	0.00719799	3		0.672978	0.0189324	3		0.542116	0.0193437	4		0.635394	0.0382987	3		0.00407341		1		0.00673611		1
3.6		0.907555	0.00794571	3		0.675896	0.0211078	3		0.541247	0.0203798	4		0.641475	0.0403522	3		0.0059944		1		0.00740741		1
3.617		0.908744	0.00954178	3		0.672826	0.0185364	3		0.540839	0.0223091	4		0.634682	0.0411924	3		0.0057861		1		0.0062037		1
3.633		0.906036	0.0079661	3		0.674082	0.0199817	3		0.539032	0.0212289	4		0.632852	0.0393912	3		0.00449001		1		0.00664352		1
3.65		0.910136	0.00841697	3		0.672158	0.0194837	3		0.540267	0.0199358	4		0.634399	0.0380233	3		0.00541579		1		0.00701389		1
3.667		0.906644	0.0117026	3		0.669015	0.017981	3		0.537444	0.0217573	4		0.628581	0.0377471	3		0.00509177		1		0.00685185		1
3.683		0.904203	0.0125854	3		0.66912	0.0208361	3		0.536318	0.0200098	4		0.629152	0.0405743	3		0.00275418		1		0.00652778		1
3.7		0.91144	0.0071989	3		0.672537	0.0173894	3		0.531562	0.0191966	4		0.626693	0.039652	3		0.00465202		1		0.00618056		1
3.717		0.899165	0.00402389	3		0.673195	0.0186745	3		0.530299	0.0202951	4		0.628294	0.0379889	3		0.0039114		1		0.00673611		1
3.733		0.906928	0.00693781	3		0.664175	0.0165809	3		0.529665	0.0219366	4		0.623463	0.0397505	3		0.00425857		1		0.00625		1
3.75		0.9064	0.00711063	3		0.664315	0.0176388	3		0.524602	0.0203738	4		0.630231	0.0376324	3		0.00296248		1		0.00627315		1
3.767		0.907467	0.00803945	3		0.663987	0.0179255	3		0.524075	0.0221663	4		0.623183	0.0377779	3		0.00273104		1		0.0055787		1
3.783		0.89871	0.00895162	3		0.662861	0.0192826	3		0.524893	0.0216642	4		0.626338	0.0385412	3		0.00444372		1		0.0062037		1
3.8		0.905179	0.0106351	3		0.664574	0.0199821	3		0.521884	0.0207102	4		0.619684	0.0397601	3		0.00310135		1		0.00601852		1
3.817		0.898265	0.00952814	3		0.659917	0.0186556	3		0.521111	0.0193768	4		0.620661	0.0405422	3		0.00141181		1		0.00664352		1
3.833		0.901001	0.00557759	3		0.656079	0.0179621	3		0.519525	0.020933	4		0.616392	0.0390269	3						0.00597222		1
3.85		0.902747	0.00952905	3		0.653792	0.0174037	3		0.519112	0.0213862	4		0.61809	0.0401021	3						0.0049537		1
3.867		0.908266	0.00406795	3		0.657206	0.0179735	3		0.515625	0.0209704	4		0.61393	0.0431424	3						0.00648148		1
3.883		0.904372	0.00523521	3		0.660167	0.0185541	3		0.512477	0.0206717	4		0.619173	0.0425503	3						0.00662037		1
3.9		0.901193	0.0116324	3		0.654712	0.0157878	3		0.515446	0.0212099	4		0.608842	0.0420796	3						0.00541667		1
3.917		0.909424	0.00809911	3		0.650764	0.0171522	3		0.512233	0.0217246	4		0.610483	0.0367669	3						0.00560185		1
3.933		0.899157	0.00535627	3		0.659897	0.0206422	3		0.510217	0.0212362	4		0.607288	0.04082	3						0.00583333		1
3.95		0.90595	0.00718676	3		0.657806	0.0167427	3		0.508615	0.0193733	4		0.609517	0.0417462	3						0.00534722		1
3.967		0.902394	0.00737663	3		0.655234	0.0187001	3		0.504304	0.0209992	4		0.608765	0.0380679	3						0.00518519		1
3.983		0.899708	0.00962362	3		0.657386	0.0187048	3		0.506086	0.0200711	4		0.610496	0.0403241	3						0.00497685		1
4		0.904535	0.00838793	3		0.652585	0.0171055	3		0.504458	0.0216345	4		0.606403	0.0432138	3						0.00527778		1
4.017		0.904972	0.0109453	3		0.65333	0.0189525	3		0.514961	0.0258079	4		0.606154	0.0381948	3						0.005		1
4.033		0.902808	0.00750944	3		0.654464	0.0187443	3		0.516967	0.0251028	4		0.604683	0.0419428	3						0.00493056		1
4.05		0.90843	0.0111166	3		0.652298	0.0171817	3		0.502322	0.019989	4		0.603585	0.0433808	3						0.00407407		1
4.067		0.899391	0.00633247	3		0.652399	0.0185001	3		0.499823	0.0228558	4		0.613264	0.0490087	3						0.00474537		1
4.083		0.901924	0.00417982	3		0.651518	0.0184937	3		0.496064	0.0224323	4		0.623164	0.065251	3						0.00516204		1
4.1		0.903547	0.00736598	3		0.65073	0.0181802	3		0.493208	0.0224286	4		0.630957	0.071421	3						0.00476852		1
4.117		0.901968	0.00621784	3		0.650524	0.0193512	3		0.494043	0.0208451	4		0.598528	0.0405018	3						0.00518519		1
4.133		0.894863	0.00861046	3		0.642508	0.014313	3		0.493743	0.0202348	4		0.596474	0.0414638	3						0.00483796		1
4.15		0.893708	0.0070351	3		0.648068	0.0200684	3		0.490689	0.0229075	4		0.595357	0.0422295	3						0.00451389		1
4.167		0.897867	0.00728878	3		0.649135	0.0190954	3		0.491564	0.0205151	4		0.594185	0.0437454	3						0.00456019		1
4.183		0.900074	0.0107335	3		0.642302	0.015148	3		0.489552	0.0211485	4		0.593593	0.0418942	3						0.00479167		1
4.2		0.898285	0.00899262	3		0.64332	0.0182318	3		0.488857	0.0194375	4		0.593645	0.0427851	3						0.00439815		1
4.217		0.899092	0.00985659	3		0.637936	0.0149573	3		0.4848	0.0200077	4		0.59483	0.0411774	3						0.00490741		1
4.233		0.897724	0.00580758	3		0.641812	0.016636	3		0.482703	0.0212799	4		0.592497	0.0434292	3						0.00444444		1
4.25		0.904802	0.00581613	3		0.642446	0.0174679	3		0.481432	0.0207886	4		0.592427	0.0455857	3						0.00525463		1
4.267		0.903253	0.00604503	3		0.640845	0.0174975	3		0.483201	0.0188424	4		0.590698	0.047717	3						0.0044213		1
4.283		0.900117	0.00709247	3		0.641481	0.0174412	3		0.480381	0.0206246	4		0.588538	0.0462861	3						0.00446759		1
4.3		0.892566	0.00742589	3		0.636633	0.0132343	3		0.478199	0.0202347	4		0.58788	0.0438713	3						0.00449074		1
4.317		0.898637	0.0087543	3		0.636034	0.0150465	3		0.477816	0.0217209	4		0.585121	0.046273	3						0.00421296		1
4.333		0.897439	0.00592952	3		0.635589	0.0174699	3		0.475557	0.0216499	4		0.589616	0.0457837	3						0.00375		1
4.35		0.90233	0.00900254	3		0.636567	0.0159397	3		0.475138	0.0168394	4		0.58384	0.0459368	3						0.00423611		1
4.367		0.897562	0.005531	3		0.634989	0.0137536	3		0.470817	0.0215267	4		0.589354	0.0468471	3						0.00328704		1
4.383		0.899801	0.00829572	3		0.636905	0.0178912	3		0.469412	0.0186335	4		0.585035	0.0428884	3						0.00386574		1
4.4		0.900936	0.00630924	3		0.633831	0.0142599	3		0.468085	0.0194691	4		0.583984	0.0449425	3						0.0037963		1
4.417		0.906847	0.00586983	3		0.628835	0.0162829	3		0.469676	0.0204981	4		0.586318	0.0493989	3						0.00416667		1
4.433		0.895242	0.00893584	3		0.632373	0.0177938	3		0.465672	0.0197274	4		0.578046	0.0509914	3						0.00456019		1
4.45		0.896767	0.00664707	3		0.63008	0.0138036	3		0.464702	0.0202219	4		0.580235	0.0475624	3						0.00405093		1
4.467		0.900736	0.00831407	3		0.629204	0.0164097	3		0.463153	0.0212158	4		0.577853	0.0454521	3						0.0043287		1
4.483		0.894331	0.0098753	3		0.630257	0.0159985	3		0.465472	0.0196898	4		0.57802	0.0485803	3						0.00435185		1
4.5		0.900884	0.00812544	3		0.6269	0.0149945	3		0.46212	0.0200225	4		0.576375	0.0459466	3						0.00407407		1
4.517		0.89915	0.00704073	3		0.625207	0.0141714	3		0.458636	0.0198745	4		0.57498	0.0491507	3						0.00377315		1
4.533		0.897326	0.00706713	3		0.629281	0.016535	3		0.463205	0.0212054	4		0.572923	0.0459062	3						0.00451389		1
4.55		0.898168	0.00469944	3		0.624643	0.0152982	3		0.454114	0.0201152	4		0.568873	0.0488682	3						0.00372685		1
4.567		0.902425	0.00516257	3		0.619678	0.0140555	3		0.454256	0.0188288	4		0.569485	0.048514	3						0.00377315		1
4.583		0.902983	0.00605527	3		0.620609	0.0145191	3		0.456169	0.0198917	4		0.570038	0.0477955	3
4.6		0.905174	0.00570054	3		0.622415	0.017923	3		0.449451	0.0195426	4		0.566437	0.0485933	3
4.617		0.900317	0.00727325	3		0.623259	0.0174368	3		0.452492	0.0174437	4		0.566663	0.044143	3
4.633		0.90225	0.00487029	3		0.619801	0.0147332	3		0.449938	0.0181244	4		0.565049	0.0466354	3
4.65		0.902936	0.00457181	3		0.619158	0.0168803	3		0.449294	0.0190739	4		0.567645	0.0481303	3
4.667		0.89636	0.00472574	3		0.618884	0.0162653	3		0.445615	0.0198194	4		0.563469	0.0473114	3
4.683		0.898767	0.00813072	3		0.619852	0.0145072	3		0.445521	0.0197603	4		0.559579	0.0447606	3
4.7		0.894687	0.00614069	3		0.612998	0.0154219	3		0.445289	0.0178963	4		0.561825	0.0483528	3
4.717		0.897474	0.00574267	3		0.618663	0.0176621	3		0.442325	0.0193669	4		0.560453	0.0466784	3
4.733		0.897732	0.00657077	3		0.619711	0.0186578	3		0.44639	0.0188388	4		0.559733	0.0472947	3
4.75		0.892969	0.00747498	3		0.615797	0.0131118	3		0.441174	0.0178619	4		0.556973	0.0485726	3
4.767		0.89465	0.00425507	3		0.614136	0.017227	3		0.440801	0.018688	4		0.553212	0.0459529	3
4.783		0.899375	0.00627598	3		0.615164	0.0173998	3		0.439641	0.0179664	4		0.556609	0.0487535	3
4.8		0.903146	0.00431913	3		0.6123	0.0150985	3		0.43655	0.0193857	4		0.552959	0.0490303	3
4.817		0.898129	0.00634742	3		0.611125	0.016879	3		0.432816	0.0195448	4		0.553723	0.0465409	3
4.833		0.896181	0.00285586	3		0.610418	0.0154	3		0.432195	0.0207359	4		0.554178	0.0466938	3
4.85		0.89782	0.00619193	3		0.611354	0.0151174	3		0.436002	0.0182417	4		0.544105	0.0508805	3
4.867		0.896043	0.0106949	3		0.609393	0.0156813	3		0.431035	0.0197308	4		0.547981	0.0462743	3
4.883		0.898422	0.00968507	3		0.606093	0.0147922	3		0.42977	0.0189645	4		0.546731	0.0510092	3
4.9		0.900419	0.0111494	3		0.608743	0.0167908	3		0.431025	0.018741	4		0.5475	0.0473877	3
4.917		0.897224	0.0104275	3		0.608063	0.0163484	3		0.431648	0.0187231	4		0.545299	0.0477011	3
4.933		0.885041	0.00543587	3		0.606311	0.0169241	3		0.427644	0.0190811	4		0.546608	0.0492862	3
4.95		0.893235	0.0104831	3		0.605141	0.0145428	3		0.423383	0.0197727	4		0.541945	0.049001	3
4.967		0.898902	0.00709008	3		0.605735	0.0194206	3		0.422501	0.0190156	4		0.542225	0.0470278	3
4.983		0.894253	0.0108326	3		0.603027	0.0143681	3		0.418639	0.0205	4		0.5407	0.0484459	3
5		0.895902	0.0101325	3		0.605283	0.0173005	3		0.419673	0.0187286	4		0.539967	0.0500218	3
