# Supplementary material for: Distinct architectural requirements for the parS centromeric sequence of the pSM19035 plasmid partition machinery
Source: eLife. 2022 Sep 5;11:e79480. doi: 10.7554/eLife.79480 (PMC9499535; doi:10.7554/eLife.79480)
Supplement: Figure 3—source data 1. [file elife-79480-fig3-data1.xlsx]

## Sheet: Fig 3A
Figure 3A-a 7R-1000 nM ParB											Figure 3A-b 4R-1000 nM ParB											Figure 3A-c 3R-1000 nM ParB											Figure 3A-d none-1000 nM ParB											Figure 3A-e 7R-250 nM ParB
		ParA-GFP				ParB							ParA-GFP				ParB							ParA-GFP				ParB							ParA-GFP				ParB							ParA-GFP
Time(min)		Mean	SEM	n		Mean	SEM	n			Time(min)		Mean	SEM	n		Mean	SEM	n			Time(min)		Mean	SEM	n		Mean	SEM	n			Time(min)		Mean	SEM	n		Mean	SEM	n			Time(min)		Mean	SEM	n
0		3928.52	196.953	5		578.08	200.808	5			0		3988.78	408.108	5		144.62	60.6805	5			0		4639.57	133.43	3		807.5	358.704	3			0		3859.9	23.3283	3		393.767	413.026	3			0		4050.36	222.463	5
0.017		3924.82	194.56	5		800.36	232.028	5			0.017		4156.5	437.997	5		285.44	139.69	5			0.017		4842	67.2333	3		1598.8	662.546	3			0.017		3956.13	61.6124	3		572.333	526.248	3			0.017		4144.36	135.946	5
0.033		3937.44	188.763	5		1049.9	323.181	5			0.033		4127.36	412.928	5		480.78	254.884	5			0.033		4805.7	103.36	3		2067.87	671.868	3			0.033		3870.77	75.9541	3		753.433	664.153	3			0.033		4049.68	188.109	5
0.05		3813.06	203.316	5		1362.32	391.962	5			0.05		4110.8	387.911	5		1008.14	362.087	5			0.05		4700.8	70.0042	3		2727.9	733.404	3			0.05		3806.17	62.2711	3		975.6	741.52	3			0.05		4085.9	160.852	5
0.067		3880.82	213.131	5		1707.62	457.087	5			0.067		4025.96	365.527	5		1673	478.834	5			0.067		4764.13	97.6149	3		3441.47	773.378	3			0.067		3745.57	77.8187	3		1127.13	696.546	3			0.067		4009.94	173.404	5
0.083		3763.54	196.076	5		2120.54	572.182	5			0.083		3859.14	324.981	5		2521.46	638.814	5			0.083		4594.47	103.607	3		3932.7	756.307	3			0.083		3704.67	95.5693	3		1402.77	719.776	3			0.083		3941.86	182.96	5
0.1		3757.7	236.765	5		2609.16	619.211	5			0.1		3814.36	317.259	5		3594.1	654.031	5			0.1		4611.37	90.0111	3		4600.1	708.27	3			0.1		3640.5	83.8928	3		1763.5	657.806	3			0.1		3888.12	176.375	5
0.117		3695.86	225.951	5		3203.96	755.427	5			0.117		3732.18	314.312	5		4699.44	636.198	5			0.117		4571.6	96.6013	3		4922.27	528.942	3			0.117		3598.6	84.5819	3		2090.9	463.834	3			0.117		3822.6	178.304	5
0.133		3616.42	219.594	5		3829.58	790.998	5			0.133		3653.6	334.256	5		5524.68	710.431	5			0.133		4437.97	86.3014	3		5202.2	376.067	3			0.133		3645.3	81.382	3		2392	244.234	3			0.133		3825.32	169.635	5
0.15		3649.98	207.991	5		4435.18	804.724	5			0.15		3627.04	303.014	5		5967.88	772.422	5			0.15		4470.17	84.2379	3		5440.7	257.493	3			0.15		3617.83	89.5714	3		2734.77	159.866	3			0.15		3712.2	137.21	5
0.167		3505.72	217.762	5		5177.74	885.046	5			0.167		3520.42	314.695	5		6012.68	873.953	5			0.167		4326.03	133.863	3		5431.83	272.616	3			0.167		3495.6	127.47	3		2690.4	89.7765	3			0.167		3672.4	163.983	5
0.183		3515.78	214.779	5		5941.78	956.707	5			0.183		3513.9	324.08	5		5666.4	923.486	5			0.183		4334.83	123.198	3		5450.23	232.998	3			0.183		3375.7	143.316	3		2859.7	50.327	3			0.183		3633.16	151.943	5
0.2		3436.06	193.266	5		6574.72	978.089	5			0.2		3410.92	334.935	5		5375.86	882.663	5			0.2		4330.27	90.6685	3		5418.1	298.063	3			0.2		3483.97	177.6	3		2989.47	108.038	3			0.2		3591.62	163.074	5
0.217		3374.8	201.655	5		7155.18	925.159	5			0.217		3334.52	322.377	5		4851.04	748.455	5			0.217		4164.33	82.1353	3		5350.33	227.038	3			0.217		3539.3	169.436	3		2793.97	131.916	3			0.217		3558.22	148.478	5
0.233		3347.1	184.621	5		7654.74	872.119	5			0.233		3174.88	294.484	5		4414.62	724.91	5			0.233		4167.33	70.1501	3		5259.63	323.803	3			0.233		3437.37	125.31	3		2506.7	209.565	3			0.233		3512.46	137.081	5
0.25		3315.48	181.064	5		8102.32	797.013	5			0.25		3184.76	340.515	5		4253.9	696.412	5			0.25		4219.87	81.8209	3		5122.6	292.297	3			0.25		3386.03	120.981	3		2795.63	172.931	3			0.25		3489.34	165.261	5
0.267		3296.16	194.908	5		8454.02	733.262	5			0.267		3080.84	310.296	5		4025.6	611.074	5			0.267		4182	116.903	3		5015.63	232.008	3			0.267		3444.2	149.024	3		2586	120.533	3			0.267		3485.38	141.16	5
0.283		3218.38	189.276	5		8486.66	603.306	5			0.283		2937.48	288.346	5		3547.1	599.646	5			0.283		4221.8	67.3379	3		4945.6	284.543	3			0.283		3356.77	144.153	3		2528.37	143.192	3			0.283		3505.3	143.776	5
0.3		3196.06	184.458	5		8502.88	567.84	5			0.3		2838.9	276.747	5		3344.16	564.225	5			0.3		4131.23	91.0535	3		4810.17	262.696	3			0.3		3304.87	255.503	3		2410.53	194.104	3			0.3		3387.94	122.893	5
0.317		3154.1	177.39	5		8589.82	436.189	5			0.317		2793.54	322.461	5		3156.88	525.475	5			0.317		3991.3	71.867	3		4758.77	225.76	3			0.317		3186.23	239.728	3		2385.77	192.968	3			0.317		3338.4	148.703	5
0.333		3125.76	198.639	5		8415.68	532.343	5			0.333		2720.96	289.436	5		3002.78	547.977	5			0.333		4147.1	90.5394	3		4762.2	189.105	3			0.333		3214.37	221.789	3		2134.03	183.402	3			0.333		3335.52	157.056	5
0.35		3023.7	209.628	5		8430.5	548.698	5			0.35		2622.1	297.529	5		2763.64	475.266	5			0.35		4050	63.6877	3		4596.53	191.519	3			0.35		3207.27	153.343	3		2240.4	359.091	3			0.35		3378.32	159.346	5
0.367		2979.34	215.62	5		8153.84	618.353	5			0.367		2485.44	268.145	5		2539.42	431.199	5			0.367		3950.57	83.9333	3		4598.57	129.428	3			0.367		3233.93	170.243	3		2153.9	269.165	3			0.367		3372.44	127.253	5
0.383		2883.06	227.444	5		7900.92	653.756	5			0.383		2466.4	269.173	5		2280.64	421.731	5			0.383		4015.77	80.381	3		4576.67	262.684	3			0.383		3184.9	233.383	3		1991.07	268.951	3			0.383		3325.78	146.868	5
0.4		2855.48	198.121	5		7673.44	609.376	5			0.4		2347.2	250.107	5		2215.34	386.731	5			0.4		4011.17	106.683	3		4582.63	241.102	3			0.4		3236.07	186.776	3		1900.9	212.84	3			0.4		3324.9	121.146	5
0.417		2795.58	198.655	5		7485.32	565.312	5			0.417		2290.78	261.281	5		2086.36	369.539	5			0.417		3916.2	85.2659	3		4567.2	260.125	3			0.417		3163.63	292.213	3		1842.17	236.206	3			0.417		3315.74	161.715	5
0.433		2743.42	188.344	5		7217.4	588.379	5			0.433		2243.88	280.868	5		2079.78	346.024	5			0.433		3961	67.7853	3		4517.97	179.761	3			0.433		3106.27	224.912	3		1926.93	115.842	3			0.433		3337.98	150.975	5
0.45		2712.18	188.958	5		7018.76	538.982	5			0.45		2194.28	266.469	5		1808.42	346.349	5			0.45		3906.3	72.6424	3		4494.9	202.822	3			0.45		3202.4	201.445	3		1850	183.694	3			0.45		3307.48	122.457	5
0.467		2607.08	190.633	5		6633.68	560.482	5			0.467		2120.78	261.029	5		1745.68	341.939	5			0.467		3975.73	62.4592	3		4500.9	225.523	3			0.467		3135.27	219.087	3		1833.43	125.837	3			0.467		3288.92	144.482	5
0.483		2527.46	202.827	5		6373.08	550.887	5			0.483		1980.3	218.541	5		1614.76	313.101	5			0.483		3981.33	70.1823	3		4480.97	189.84	3			0.483		3101.07	226.223	3		1769.17	103.851	3			0.483		3275.36	136.434	5
0.5		2443.34	188.378	5		6185.06	529.438	5			0.5		1930.82	222.454	5		1610.84	262.515	5			0.5		3943.03	87.406	3		4356.33	179.896	3			0.5		3092.93	239.895	3		1749.47	92.3293	3			0.5		3263.18	130.278	5
0.517		2408.54	202.849	5		5876.18	519.628	5			0.517		1853.2	213.827	5		1576.26	248.713	5			0.517		3963.2	81.0536	3		4395.4	249.736	3			0.517		3118.8	140.705	3		1656.47	141.467	3			0.517		3227.18	154.751	5
0.533		2352.38	193.129	5		5629.64	532.362	5			0.533		1794.2	207.695	5		1493.76	237.06	5			0.533		3936.1	77.5	3		4408.63	277.188	3			0.533		3106.07	242.677	3		1745.23	72.8345	3			0.533		3242.84	112.928	5
0.55		2301.54	195.357	5		5347.3	497.716	5			0.55		1779.7	218.856	5		1312.16	278.402	5			0.55		3845.2	65.5725	3		4359.23	243.032	3			0.55		3090.43	181.111	3		1795.4	99.3103	3			0.55		3146.14	141.695	5
0.567		2249.14	188.171	5		5238.94	492.375	5			0.567		1693.04	216.761	5		1329.6	259.063	5			0.567		3884.73	69.3007	3		4268	252.737	3			0.567		3136.63	179.092	3		1743.87	92.5666	3			0.567		3174.88	136.54	5
0.583		2140.82	189.479	5		4989.84	491.461	5			0.583		1656.38	195.873	5		1170.2	218.459	5			0.583		3838.63	71.7472	3		4280.33	236.754	3			0.583		3173.1	236.081	3		1677.2	126.786	3			0.583		3119.28	124.491	5
0.6		2078.12	182.895	5		4784.54	487.485	5			0.6		1564.42	182.705	5		1119.06	194.035	5			0.6		3808.47	64.4817	3		4304.1	294.322	3			0.6		3054.07	248.94	3		1711.73	135.777	3			0.6		3121.14	151.868	5
0.617		2020.54	166.987	5		4542.76	456.741	5			0.617		1555.44	192.547	5		1204.16	174.308	5			0.617		3843.47	63.2969	3		4233.57	294.597	3			0.617		3084.67	199.497	3		1708.8	33.2608	3			0.617		3134.74	132.444	5
0.633		1989.98	171.605	5		4369.8	439.651	5			0.633		1507.98	186.218	5		1114.02	186.536	5			0.633		3756.7	76.3546	3		4219.7	265.258	3			0.633		3069	253.421	3		1756.37	77.8328	3			0.633		3095.32	126.081	5
0.65		1964.98	151.254	5		4247.86	398.424	5			0.65		1447.18	188.969	5		1107.2	166.731	5			0.65		3755.97	55.0245	3		4200.13	196.371	3			0.65		3041.97	223.427	3		1782	200.249	3			0.65		3076.12	131.392	5
0.667		1898.42	156.307	5		4071.4	378.852	5			0.667		1385	167.926	5		1034.32	148.465	5			0.667		3842.3	64.2607	3		4191.13	154.083	3			0.667		3054.93	214.549	3		1706.57	161.334	3			0.667		3037.02	121.82	5
0.683		1826.48	161.081	5		4011	349.32	5			0.683		1372.18	178.29	5		986	164.509	5			0.683		3714.87	70.6832	3		4161.57	219.182	3			0.683		3058.03	266.735	3		1747.13	120.758	3			0.683		3020.56	153.428	5
0.7		1789	160.98	5		3849.24	392.463	5			0.7		1305.86	163.445	5		904.44	172.418	5			0.7		3701.93	64.6193	3		4140.23	317.161	3			0.7		2942.53	256.126	3		1700.47	183.461	3			0.7		3055.48	115.173	5
0.717		1749.16	138.06	5		3672	409.476	5			0.717		1278.76	153.978	5		826.38	131.706	5			0.717		3847.17	78.2558	3		4160.8	155.267	3			0.717		2997.03	225.948	3		1659.83	155.105	3			0.717		3018.9	126.248	5
0.733		1710.52	146.512	5		3496.32	393.454	5			0.733		1266.2	160.325	5		827.56	146.513	5			0.733		3823.3	68.7302	3		4144.9	122.519	3			0.733		3003.97	193.422	3		1654.3	192.061	3			0.733		2995.6	126.607	5
0.75		1626.72	144.933	5		3414.04	332.18	5			0.75		1205.54	139.401	5		812.4	152.003	5			0.75		3716.3	70.1115	3		4160.37	148.002	3			0.75		3043.97	169.03	3		1736	216.471	3			0.75		2962.64	133.147	5
0.767		1606.6	145.857	5		3266.08	298.273	5			0.767		1161.54	146.606	5		761.8	131.369	5			0.767		3856.6	69.2135	3		4095.77	165.582	3			0.767		3100	184.886	3		1719.57	219.82	3			0.767		2937.42	124.45	5
0.783		1561.3	143.092	5		3202.78	275.39	5			0.783		1138.18	134.16	5		735.22	133.956	5			0.783		3885.93	61.1458	3		4147.93	232.223	3			0.783		3035.1	210.386	3		1702	244.504	3			0.783		2899.58	118.826	5
0.8		1527.36	141.118	5		3080.4	281.563	5			0.8		1107.02	132.579	5		651.56	132.46	5			0.8		3669.37	63.7603	3		4154.83	252.365	3			0.8		2942.33	228.135	3		1673.8	150.334	3			0.8		2920.18	129.238	5
0.817		1496.88	125.973	5		2942.56	284.025	5			0.817		1072.04	136.599	5		789.5	135.135	5			0.817		3858.17	99.9086	3		4193.57	262.025	3			0.817		2940.73	197.919	3		1748.13	137.738	3			0.817		2886.04	142.36	5
0.833		1419.88	135.093	5		2919.1	256.763	5			0.833		1041.84	119.675	5		675.24	152.659	5			0.833		3869	65.7502	3		4175.93	206.88	3			0.833		2950.63	243.109	3		1695.3	152.851	3			0.833		2891.44	101.062	5
0.85		1383.18	130.542	5		2807.72	266.909	5			0.85		997.06	124.494	5		676.7	117.38	5			0.85		3741.53	73.829	3		4146.3	206.225	3			0.85		2859.5	213.15	3		1698.67	178.021	3			0.85		2828.68	108.352	5
0.867		1332.14	118.223	5		2663.44	291.743	5			0.867		986.52	115.303	5		588.78	85.484	5			0.867		3743.93	68.5444	3		4160.77	165.919	3			0.867		2966.77	193.287	3		1738.23	203.174	3			0.867		2803.3	135.197	5
0.883		1326.16	126.437	5		2556.12	263.122	5			0.883		948.96	121.188	5		580.82	151.837	5			0.883		3800.97	88.0163	3		4224.53	248.236	3			0.883		3006.47	187.445	3		1829.9	132.754	3			0.883		2763.16	111.341	5
0.9		1274.16	120.86	5		2449.78	242.381	5			0.9		906.64	107.581	5		519.04	76.4154	5			0.9		3768.1	73.1945	3		4120.87	191.082	3			0.9		2972.63	196.962	3		1706.47	116.266	3			0.9		2750.08	121.53	5
0.917		1249.12	129.702	5		2467.66	238.203	5			0.917		890.5	104.106	5		544.68	89.2653	5			0.917		3700.47	80.5978	3		4037.43	223.729	3			0.917		2981.87	182.339	3		1754.13	146.995	3			0.917		2695.46	116.067	5
0.933		1177.72	124.731	5		2327.28	216.404	5			0.933		884.6	97.7399	5		552.94	68.4483	5			0.933		3728.53	56.3943	3		4213.53	260.872	3			0.933		2902.9	217.064	3		1783.7	92.7871	3			0.933		2679.68	116.764	5
0.95		1173.36	122.659	5		2237.3	232.452	5			0.95		853.12	96.554	5		563.8	121.424	5			0.95		3724.67	72.9977	3		4023.33	224.309	3			0.95		2900.9	188.248	3		1761	139.338	3			0.95		2676.74	147.138	5
0.967		1127.32	104.355	5		2127.24	198.628	5			0.967		843.28	99.316	5		505.86	72.8439	5			0.967		3603.3	69.1162	3		3936.93	198.501	3			0.967		2965.47	244.855	3		1797.93	203.48	3			0.967		2627.52	120.514	5
0.983		1105.06	106.083	5		2079.3	188.685	5			0.983		804.28	89.7052	5		511.84	103.847	5			0.983		3702.73	70.4049	3		4009.17	273.096	3			0.983		2922.53	210.288	3		1746.5	142.577	3			0.983		2586.44	123.852	5
1		1059.24	108.85	5		1996.06	197.972	5			1		793.98	81.8993	5		413.58	76.0985	5			1		3691.03	72.5515	3		3987.93	204.111	3			1		2932.33	219.257	3		1687.37	162.348	3			1		2585.54	124.72	5
1.017		1041.58	98.0138	5		1945.72	205.274	5			1.017		773.72	88.1981	5		424.94	95.5347	5			1.017		3667.8	93.132	3		4008.13	225.109	3			1.017		2994.07	187.542	3		1753.6	113.733	3			1.017		2568.92	118.091	5
1.033		1008.6	102.384	5		1858.48	197.909	5			1.033		754.72	84.4164	5		367.32	68.776	5			1.033		3650.8	70.9348	3		3948.53	175.314	3			1.033		2990.4	211.125	3		1735.83	170.017	3			1.033		2500.1	112.373	5
1.05		964.98	99.6504	5		1802.34	180.228	5			1.05		753	94.5395	5		369.64	49.3816	5			1.05		3675.37	79.3755	3		3993.8	172.777	3			1.05		2849.7	244.683	3		1890.83	29.7005	3			1.05		2441.72	122.184	5
1.067		959	92.0097	5		1712.06	182.296	5			1.067		702.26	71.423	5		392.7	94.7371	5			1.067		3741.93	96.3815	3		4028.17	169.923	3			1.067		2863.2	202.557	3		1898.23	158.348	3			1.067		2392.46	110.625	5
1.083		924.82	91.9953	5		1647	144.224	5			1.083		699.72	74.2492	5		445.3	64.7912	5			1.083		3743.63	40.8171	3		3971.9	165.776	3			1.083		2871.17	286.176	3		1786.7	70.1335	3			1.083		2388.92	137.565	5
1.1		908.86	89.2859	5		1628.14	147.399	5			1.1		669.18	82.3829	5		300.94	93.3805	5			1.1		3737.47	82.2475	3		3910	142.7	3			1.1		2801.1	279.246	3		1769.6	148.916	3			1.1		2376.64	112.757	5
1.117		867.9	85.4136	5		1551.36	153.656	5			1.117		657.94	69.856	5		374.14	60.3579	5			1.117		3648.8	65.7329	3		3898.83	183.567	3			1.117		2812.93	279.299	3		1624.4	159.258	3			1.117		2343.4	131.699	5
1.133		853.52	91.4039	5		1543.02	149.945	5			1.133		650.66	64.9289	5		377.3	41.8217	5			1.133		3717.3	87.3616	3		3887.1	188.084	3			1.133		2806.3	260.804	3		1647.8	170.507	3			1.133		2303.28	106.013	5
1.15		816.74	85.3858	5		1484.32	124.546	5			1.15		603.26	66.4266	5		301.38	57.1566	5			1.15		3710.03	67.7411	3		3823.67	185.276	3			1.15		2837.63	212.483	3		1750.57	66.1604	3			1.15		2269.08	119.015	5
1.167		795.6	82.6417	5		1477.3	142.4	5			1.167		609.16	70.4772	5		401.18	64.0789	5			1.167		3728.8	62.2643	3		3849.4	175.143	3			1.167		2796.77	260.895	3		1734.4	202.581	3			1.167		2203.06	121.123	5
1.183		797.1	71.9998	5		1424.58	128.798	5			1.183		600.34	66.4609	5		394.08	64.0483	5			1.183		3683.57	84.898	3		3879.7	158.791	3			1.183		2860.77	250.403	3		1698.6	94.143	3			1.183		2169.48	109.622	5
1.2		763.84	73.5182	5		1367.18	151.447	5			1.2		577.82	66.9515	5		370.16	71.5125	5			1.2		3707.73	96.5039	3		3819.7	133.59	3			1.2		2901.4	171.164	3		1761.5	102.612	3			1.2		2124.96	119.398	5
1.217		745.76	82.7032	5		1323.06	156.991	5			1.217		571.98	53.8088	5		424.72	47.6219	5			1.217		3683.03	94.4434	3		3768.83	186.335	3			1.217		2839.97	244.829	3		1720.33	26.126	3			1.217		2075.84	110.331	5
1.233		724.96	71.3786	5		1342.98	103.695	5			1.233		560.22	58.8696	5		407.7	93.4053	5			1.233		3799.4	68.4641	3		3895.3	173.503	3			1.233		2828.27	209.425	3		1764.93	38.8783	3			1.233		2052.8	109.401	5
1.25		695.38	79.0285	5		1229.12	100.914	5			1.25		550.54	63.3779	5		373.58	56.3659	5			1.25		3572.83	57.8034	3		3847.5	137.138	3			1.25		2855.43	242.826	3		1664.6	70.6739	3			1.25		2024.08	114.976	5
1.267		675.52	78.4569	5		1249.36	120.37	5			1.267		515.38	53.8595	5		261.56	78.3909	5			1.267		3625.07	99.3334	3		3805.93	162.149	3			1.267		2772.03	190.648	3		1750.6	85.7921	3			1.267		1971.46	107.222	5
1.283		657.4	68.6754	5		1166.02	130.605	5			1.283		524.36	54.1299	5		259.46	51.4929	5			1.283		3767.73	71.3094	3		3817.73	178.552	3			1.283		2770.8	256.739	3		1732.97	50.6295	3			1.283		1921.4	91.915	5
1.3		635.54	79.0242	5		1151.28	134.647	5			1.3		496.26	54.1291	5		284.86	97.4828	5			1.3		3643.37	80.9155	3		3811.23	136.485	3			1.3		2807.37	248.574	3		1712.17	69.5006	3			1.3		1860.58	106.165	5
1.317		613.5	74.9319	5		1160.34	124.169	5			1.317		509.22	57.7586	5		312.22	82.2076	5			1.317		3686.43	103.381	3		3792.53	183.852	3			1.317		2756.1	242.849	3		1641.7	90.2593	3			1.317		1862.7	100.887	5
1.333		599.62	70.2232	5		1056.24	115.974	5			1.333		490.78	57.0816	5		340.88	72.2906	5			1.333		3679.13	76.0891	3		3734.2	178.381	3			1.333		2727.37	218.816	3		1656.2	76.7615	3			1.333		1789.8	94.8392	5
1.35		581.26	69.5578	5		1083.18	129.615	5			1.35		496.62	55.3074	5		261.76	59.2139	5			1.35		3654.43	107.405	3		3779.53	194.734	3			1.35		2717.87	265.675	3		1630.23	43.5013	3			1.35		1738.14	106.941	5
1.367		572.52	60.7713	5		1005.5	92.9581	5			1.367		470.5	49.3719	5		244.58	58.1818	5			1.367		3567.97	77.326	3		3755.5	174.361	3			1.367		2711.2	172.969	3		1686.47	81.4128	3			1.367		1709.6	83.7449	5
1.383		546.44	60.0815	5		1027.24	110.216	5			1.383		457.74	41.545	5		289.66	57.1971	5			1.383		3595.67	62.2699	3		3678.8	95.6814	3			1.383		2789.53	232.553	3		1714.03	101.145	3			1.383		1651.88	98.637	5
1.4		534.26	60.9771	5		929.04	89.064	5			1.4		459.6	53.1837	5		237.94	68.003	5			1.4		3540.3	71.9059	3		3720.03	154.941	3			1.4		2756.77	258.801	3		1650.23	126.157	3			1.4		1639.84	92.2826	5
1.417		510.14	61.6365	5		928.62	104.792	5			1.417		448.16	47.39	5		294.64	41.5733	5			1.417		3613.8	92.4801	3		3751.87	161.794	3			1.417		2730.67	268.521	3		1632.13	58.7442	3			1.417		1615.34	90.2843	5
1.433		503.44	56.4	5		862.78	104.541	5			1.433		431.42	45.7509	5		392.66	32.915	5			1.433		3601.97	59.1534	3		3718.77	169.774	3			1.433		2691.67	267.161	3		1575.47	83.5236	3			1.433		1592.42	88.3608	5
1.45		483.98	57.7313	5		893.18	107.958	5			1.45		403.54	39.0903	5		302.12	49.4684	5			1.45		3616.7	62.4885	3		3622.43	143.661	3			1.45		2677.27	224.964	3		1523.1	134.434	3			1.45		1533.1	101.612	5
1.467		476.64	54.262	5		791.18	110.466	5			1.467		421.46	33.4222	5		300.8	78.845	5			1.467		3551.37	69.7487	3		3686.17	192.107	3			1.467		2762.93	215.203	3		1673.83	44.2625	3			1.467		1507.12	86.784	5
1.483		461.96	50.6797	5		820.74	91.6952	5			1.483		394.46	43.2114	5		356.16	28.4834	5			1.483		3591.77	68.6001	3		3676.17	187.112	3			1.483		2759.77	204.429	3		1830.43	29.1302	3			1.483		1495.24	84.3177	5
1.5		446.28	52.7007	5		822.56	90.4645	5			1.5		403.36	39.198	5		337.36	88.0261	5			1.5		3643.8	59.9374	3		3566.97	130.231	3			1.5		2740.33	217.555	3		1585.8	84.4508	3			1.5		1452.06	98.7851	5
1.517		430.94	51.2904	5		706.04	73.0442	5			1.517		377.32	36.1119	5		307.2	53.6139	5			1.517		3598.4	68.4994	3		3639.23	196.962	3			1.517		2760.03	229.82	3		1651.97	20.612	3			1.517		1422.3	84.8024	5
1.533		424.72	46.7938	5		763.16	100.702	5			1.533		379.72	37.3368	5		329.58	58.4462	5			1.533		3549.3	90.4074	3		3598.2	190.447	3			1.533		2736.17	252.243	3		1667.8	91.2828	3			1.533		1368.62	75.4652	5
1.55		420.74	43.3127	5		661.68	95.3583	5			1.55		382.72	33.4769	5		324.52	43.0217	5			1.55		3630.1	82.7725	3		3650.87	168.579	3			1.55		2767.13	246.265	3		1615.8	117.992	3			1.55		1345.58	85.9711	5
1.567		399.56	46.7367	5		704.7	107.445	5			1.567		381.9	37.6655	5		288.94	58.4752	5			1.567		3593.07	85.7991	3		3651.83	91.4697	3			1.567		2786.6	199.866	3		1684.73	95.708	3			1.567		1295.5	73.0565	5
1.583		394.2	45.5606	5		673.08	72.9323	5			1.583		372.82	40.0436	5		306.32	39.9059	5			1.583		3510.33	90.1873	3		3641.97	110.901	3			1.583		2765.47	249.101	3		1662.53	108.803	3			1.583		1265.14	80.173	5
1.6		385.44	41.8659	5		672.76	76.9467	5			1.6		365.54	42.4154	5		425.74	45.4909	5			1.6		3497.83	65.1174	3		3789.27	137.46	3			1.6		2687.73	257.855	3		1672.37	74.598	3			1.6		1262.2	80.5596	5
1.617		371.6	45.4772	5		673.42	52.1181	5			1.617		349.9	35.5938	5		309.98	69.0851	5			1.617		3486.4	67.1185	3		3686.9	147.99	3			1.617		2713.73	208.457	3		1682.23	29.9866	3			1.617		1210.74	83.6821	5
1.633		369.62	38.7955	5		650.44	78.4941	5			1.633		350.52	30.6407	5		315.22	33.9327	5			1.633		3586.17	84.5806	3		3633.07	153.027	3			1.633		2714.4	202.374	3		1670.57	61.1331	3			1.633		1193.48	76.7547	5
1.65		358.08	41.8049	5		630.18	69.8771	5			1.65		347.2	32.7835	5		275.42	47.1529	5			1.65		3451.4	66.5069	3		3647.93	209.629	3			1.65		2712.17	183.823	3		1660.33	66.3383	3			1.65		1170.98	69.5545	5
1.667		358.6	39.864	5		576.16	70.3625	5			1.667		340.56	30.7971	5		240.06	55.517	5			1.667		3539.17	56.1866	3		3663.9	185.753	3			1.667		2719.47	181.023	3		1759.3	44.7689	3			1.667		1114.52	67.9067	5
1.683		348.3	35.9078	5		565.9	70.428	5			1.683		338.7	36.2439	5		273.56	68.8735	5			1.683		3512.27	70.6999	3		3691.23	208.764	3			1.683		2711.13	224.315	3		1644.7	54.0509	3			1.683		1101.68	72.4483	5
1.7		337.24	38.345	5		587.48	68.0813	5			1.7		331.28	37.0705	5		179.08	68.1404	5			1.7		3480.03	77.5545	3		3557.57	149.831	3			1.7		2616.4	265.597	3		1694.53	59.746	3			1.7		1067.66	67.4532	5
1.717		330.26	36.9373	5		589.86	72.0461	5			1.717		319.02	33.8777	5		282.18	71.4792	5			1.717		3505.9	74.0302	3		3704.1	202.835	3			1.717		2644.93	234.385	3		1658.13	78.0542	3			1.717		1048.82	74.4783	5
1.733		315.42	34.5029	5		575.8	72.4102	5			1.733		312.22	34.2584	5		297.62	71.3895	5			1.733		3517.07	82.4782	3		3699.1	180.875	3			1.733		2595.83	237.077	3		1656.27	35.842	3			1.733		1016	67.481	5
1.75		315.72	35.9929	5		524.88	79.3503	5			1.75		316.48	32.8474	5		226.96	51.3483	5			1.75		3475.07	67.8484	3		3546.2	151.508	3			1.75		2588.27	219.549	3		1578.37	30.8607	3			1.75		992.6	66.2071	5
1.767		307.7	38.3886	5		551.18	70.2211	5			1.767		301.3	31.2001	5		254.74	36.2757	5			1.767		3415.2	66.967	3		3731.67	224.325	3			1.767		2584.73	259.899	3		1647.97	149.434	3			1.767		957.38	70.005	5
1.783		305.68	33.4893	5		503.14	57.5639	5			1.783		294.38	30.4733	5		245.54	24.5953	5			1.783		3476.13	56.7241	3		3671.23	233.288	3			1.783		2636.63	211.626	3		1629.37	28.9644	3			1.783		946.52	72.2718	5
1.8		290.54	34.0853	5		501.2	45.5029	5			1.8		298.2	33.4091	5		223	57.7941	5			1.8		3466.67	89.3814	3		3692.9	249.638	3			1.8		2629	230.766	3		1573.07	62.6835	3			1.8		947.76	52.9121	5
1.817		288.52	31.3112	5		512.92	51.541	5			1.817		299.16	37.0309	5		249.84	47.089	5			1.817		3434.5	66.4269	3		3652.33	219.569	3			1.817		2700.33	232.043	3		1682.97	95.6886	3			1.817		899.82	53.8894	5
1.833		281.44	31.6793	5		495.22	45.7956	5			1.833		292.28	26.6521	5		238.2	29.2965	5			1.833		3482.2	64.4811	3		3611.03	206.583	3			1.833		2674.5	256.366	3		1636.6	85.7567	3			1.833		891.96	64.3102	5
1.85		269.3	35.1081	5		467.2	54.4154	5			1.85		289.54	29.7927	5		232.16	43.7343	5			1.85		3419.8	91.4818	3		3664.2	237.062	3			1.85		2601.47	271.708	3		1561.47	120.187	3			1.85		856.7	53.553	5
1.867		271.86	34.981	5		495.16	31.4285	5			1.867		276.86	26.1782	5		248.58	52.9886	5			1.867		3527.3	66.3966	3		3604.8	221.829	3			1.867		2613.13	186.913	3		1680.4	67.1795	3			1.867		827	58.4802	5
1.883		255.64	32.6508	5		447.4	46.3075	5			1.883		277.14	25.5136	5		217.66	39.3769	5			1.883		3462.57	66.9254	3		3635.97	321.333	3			1.883		2619.17	248.811	3		1679.4	9.63483	3			1.883		808.26	57.6697	5
1.9		262.22	32.5949	5		491.4	52.165	5			1.9		268.68	20.6987	5		253.48	97.7296	5			1.9		3526.63	70.0032	3		3689.93	267.841	3			1.9		2565.93	276.149	3		1723.73	64.1636	3			1.9		801.84	59.0866	5
1.917		252.16	26.5579	5		466.02	43.5102	5			1.917		269.74	31.1278	5		212.18	73.7805	5			1.917		3557.57	66.9866	3		3566.2	127.114	3			1.917		2631.77	218.13	3		1751.57	47.5689	3			1.917		773.56	52.9853	5
1.933		247.22	29.7865	5		469.76	37.025	5			1.933		264.3	27.9678	5		137.18	56.8749	5			1.933		3499.8	69.7169	3		3579.13	129.668	3			1.933		2645.57	273.726	3		1621.7	65.2216	3			1.933		733	45.8056	5
1.95		244.28	29.1227	5		452.38	40.6655	5			1.95		261.24	27.0864	5		203.08	42.5553	5			1.95		3472.23	67.2795	3		3659.03	164.211	3			1.95		2580.5	237.79	3		1679.43	48.7889	3			1.95		713.7	45.4178	5
1.967		230.3	30.2913	5		447.16	59.4186	5			1.967		244.18	25.44	5		219.88	58.8152	5			1.967		3537.3	67.4099	3		3627.1	152.938	3			1.967		2608.87	239.054	3		1558.33	42.652	3			1.967		703.24	44.7129	5
1.983		243.24	28.7713	5		470.06	53.2304	5			1.983		260.88	25.8507	5		259.9	64.4479	5			1.983		3387.97	71.4667	3		3530.97	171.098	3			1.983		2623.1	230.235	3		1694.6	12.0898	3			1.983		677.66	46.4844	5
2		232.5	25.9469	5		459.24	24.0799	5			2		234.34	23.0771	5		192.74	41.7368	5			2		3419.17	76.8436	3		3602.1	295.502	3			2		2623.33	226.984	3		1678.67	65.9495	3			2		672.48	44.2136	5
2.017		227.58	30.9418	5		453.38	47.427	5			2.017		249.74	22.7622	5		224.34	55.6779	5			2.017		3486.57	67.4054	3		3740.03	249.945	3			2.017		2581.93	244.504	3		1496.07	138.537	3			2.017		652.36	40.8642	5
2.033		218.92	28.145	5		422.52	54.2454	5			2.033		252.88	28.516	5		246.56	48.7353	5			2.033		3366.4	73.0703	3		3612.37	213.609	3			2.033		2581.3	240.813	3		1582.13	103.066	3			2.033		637.96	47.4102	5
2.05		213.42	27.7952	5		427.6	50.8734	5			2.05		240.48	22.4962	5		223.3	41.541	5			2.05		3326.63	59.7751	3		3573.67	183.751	3			2.05		2600	194.155	3		1567.97	79.8094	3			2.05		610.26	43.1831	5
2.067		209.34	28.6544	5		449.1	34.2969	5			2.067		234.14	24.0156	5		236.1	67.1373	5			2.067		3443	67.4529	3		3632.53	151.82	3			2.067		2602.6	178.367	3		1525.87	14.8551	3			2.067		591.12	45.5067	5
2.083		212.64	23.178	5		408.06	63.0687	5			2.083		240.42	20.616	5		344.16	57.6372	5			2.083		3415.83	72.2375	3		3624.33	260.468	3			2.083		2569.93	295.781	3		1618.9	81.9995	3			2.083		579.2	36.7365	5
2.1		205.94	25.3787	5		432.88	37.1411	5			2.1		229.96	25.3642	5		306.4	74.5399	5			2.1		3343.4	60.0623	3		3617.67	223.247	3			2.1		2535.6	227.997	3		1712.2	46.0999	3			2.1		570.14	42.6694	5
2.117		201.18	27.4522	5		437.54	46.1048	5			2.117		234.76	23.4607	5		322.2	67.1874	5			2.117		3331.93	68.0908	3		3587.93	200.477	3			2.117		2489.5	285.778	3		1586.37	76.7939	3			2.117		556.64	38.8789	5
2.133		189.66	22.3307	5		474.42	24.6601	5			2.133		220.54	19.7052	5		187.68	69.8225	5			2.133		3373.3	75.6132	3		3593.9	150.725	3			2.133		2486.4	243.159	3		1678.87	46.7794	3			2.133		537.78	37.5643	5
2.15		196.44	25.929	5		398.4	44.3382	5			2.15		221.3	24.5019	5		206.2	70.7178	5			2.15		3337.63	57.6485	3		3710.83	235.644	3			2.15		2578.1	250.189	3		1588.73	71.3723	3			2.15		520.4	41.9497	5
2.167		191.98	20.6165	5		410.88	61.7911	5			2.167		209.82	17.4214	5		257.32	51.9267	5			2.167		3317.3	78.8115	3		3577.97	242.376	3			2.167		2545.77	207.722	3		1652.83	66.8864	3			2.167		506.74	41.508	5
2.183		195.26	24.3585	5		435.06	48.2888	5			2.183		208	17.7391	5		287.64	65.4997	5			2.183		3457.03	78.2316	3		3629.83	263.858	3			2.183		2526	250.229	3		1715.13	17.1799	3			2.183		504.4	40.8161	5
2.2		193.36	23.7937	5		420.94	50.6104	5			2.2		222.88	22.6809	5		338.52	71.2244	5			2.2		3320.9	71.5646	3		3640.9	220.724	3			2.2		2531.83	272.536	3		1584.03	124.141	3			2.2		491.16	30.7006	5
2.217		179.2	25.8012	5		428.14	42.7228	5			2.217		217.98	22.4326	5		200.34	46.7294	5			2.217		3418.1	57.6533	3		3570.23	219.637	3			2.217		2499.17	278.186	3		1609.1	64.3851	3			2.217		464.14	31.6971	5
2.233		188.72	23.108	5		451.04	24.1424	5			2.233		211.74	23.6745	5		275.68	83.7666	5			2.233		3425.37	55.0164	3		3493.5	203.715	3			2.233		2515.63	236.591	3		1634.87	105.81	3			2.233		460.78	35.1134	5
2.25		175.38	20.371	5		438.62	42.4211	5			2.25		208.6	19.6084	5		243.92	74.3388	5			2.25		3285.27	48.4975	3		3529.07	192.787	3			2.25		2510.2	262.673	3		1654.23	56.763	3			2.25		434.52	33.5952	5
2.267		178.1	24.3725	5		439.58	50.5854	5			2.267		211.12	25.296	5		284.1	68.8947	5			2.267		3400.8	63.0975	3		3502.5	236.612	3			2.267		2429.43	242.369	3		1677.2	40.3331	3			2.267		422.2	29.9837	5
2.283		176.6	22.9688	5		392.56	43.6525	5			2.283		205.18	23.2063	5		248.66	58.8733	5			2.283		3424.4	67.5942	3		3445.47	216.468	3			2.283		2429.33	263.003	3		1689.97	54.4625	3			2.283		419.46	34.7358	5
2.3		161.68	26.0885	5		414.38	63.2168	5			2.3		200.26	21.1135	5		240.16	92.2306	5			2.3		3309.1	68.8995	3		3473.07	211.353	3			2.3		2484.03	240.117	3		1618.33	70.6854	3			2.3		411.5	28.3933	5
2.317		169.2	26.0715	5		384.74	43.8827	5			2.317		200.92	20.9754	5		268.46	62.4726	5			2.317		3315.4	73.3595	3		3504.07	173.322	3			2.317		2453.03	237.856	3		1606.3	68.2068	3			2.317		398.78	30.7871	5
2.333		167.66	16.731	5		391.68	40.7136	5			2.333		187.26	16.5589	5		185.7	90.74	5			2.333		3396.1	58.3641	3		3495.77	152.333	3			2.333		2481.57	275.529	3		1693.53	73.4767	3			2.333		385.66	26.0833	5
2.35		170.7	19.7592	5		386.88	51.8113	5			2.35		186.66	19.6429	5		217.74	74.8462	5			2.35		3298.53	78.6616	3		3385.43	133.745	3			2.35		2492.93	260.1	3		1602.27	74.4365	3			2.35		380.64	26.924	5
2.367		161	19.7651	5		408.34	57.0683	5			2.367		191.9	19.575	5		157.26	93.0477	5			2.367		3271.87	89.4702	3		3424.67	191.032	3			2.367		2474.07	254.091	3		1616	65.9209	3			2.367		367.22	22.8226	5
2.383		154.22	21.6884	5		394.26	49.6029	5			2.383		189.82	19.2958	5		287.16	79.366	5			2.383		3344.93	102.156	3		3427.63	214.54	3			2.383		2431.7	228.504	3		1571.03	98.3562	3			2.383		361.7	27.6872	5
2.4		157.44	22.0652	5		366.16	52.125	5			2.4		179.3	17.2326	5		183.44	90.9387	5			2.4		3250.17	85.8647	3		3405.87	218.018	3			2.4		2437	256.964	3		1574.87	58.6668	3			2.4		358.42	24.4518	5
2.417		159.76	17.8775	5		366.64	53.7178	5			2.417		183.42	21.9638	5		150.56	50.6703	5			2.417		3390.67	69.6008	3		3411.93	164.555	3			2.417		2484.33	231.888	3		1597.2	103.765	3			2.417		348.74	25.3176	5
2.433		150.56	22.1157	5		386.44	34.034	5			2.433		181.74	16.2898	5		136.18	52.8465	5			2.433		3206.13	55.7014	3		3429.63	258.053	3			2.433		2423.83	252.759	3		1608.5	20.6826	3			2.433		336.94	25.9384	5
2.45		150.18	22.2232	5		378.88	37.7846	5			2.45		182.24	13.384	5		195.3	59.6011	5			2.45		3359.83	51.6477	3		3409.7	162.558	3			2.45		2479.57	194.308	3		1630.97	39.0945	3			2.45		321.04	24.5185	5
2.467		145.7	21.8743	5		343.84	45.9432	5			2.467		174.36	16.5454	5		157.46	93.5815	5			2.467		3338.1	80.5723	3		3478.83	217.159	3			2.467		2475.47	260.846	3		1509.23	52.1287	3			2.467		313.32	23.3912	5
2.483		149.76	20.0302	5		395.48	24.3243	5			2.483		181.88	20.9093	5		185.94	73.452	5			2.483		3282.17	73.1348	3		3418.5	155.254	3			2.483		2422	215.669	3		1560.13	107.524	3			2.483		317.34	22.4413	5
2.5		149.12	16.8541	5		339.42	57.2148	5			2.5		176.26	17.198	5		144.68	74.1105	5			2.5		3283.67	65.1198	3		3501.73	211.45	3			2.5		2397.93	248.823	3		1639.9	31.1078	3			2.5		301.08	22.9013	5
2.517		145.64	17.8382	5		348.74	53.506	5			2.517		169.66	17.7401	5		73.98	60.4497	5			2.517		3250.5	73.1449	3		3407.17	74.2941	3			2.517		2453.13	216.888	3		1525.83	40.0482	3			2.517		293.38	20.1822	5
2.533		139.02	22.1822	5		321.46	53.8041	5			2.533		167.9	23.5701	5		123.78	87.9974	5			2.533		3353.7	56.636	3		3404.07	194.346	3			2.533		2452.63	279.816	3		1649.53	44.9261	3			2.533		285.78	20.4282	5
2.55		142.9	20.05	5		352.66	47.8324	5			2.55		169.54	12.5586	5		190.26	74.5716	5			2.55		3227.53	72.9288	3		3381.73	181.996	3			2.55		2389.97	252.825	3		1645.7	31.3052	3			2.55		278.12	19.8024	5
2.567		145.06	18.9221	5		347.64	49.5728	5			2.567		166.92	20.1214	5		122.02	94.5345	5			2.567		3262.87	75.8902	3		3387.47	184.652	3			2.567		2403.8	264.995	3		1585.1	127.96	3			2.567		269.98	18.0409	5
2.583		137.76	20.3982	5		353.18	33.6707	5			2.583		150.98	13.4068	5		149.08	119.607	5			2.583		3302.3	76.3811	3		3403.53	151.737	3			2.583		2345.63	280.597	3		1595.9	41.1792	3			2.583		262.16	22.7112	5
2.6		134.16	19.9045	5		315.08	40.0351	5			2.6		164.58	11.159	5		188.46	129.277	5			2.6		3298.83	77.6872	3		3349.03	133.721	3			2.6		2341.37	254.599	3		1617.87	14.3181	3			2.6		261.52	19.1163	5
2.617		127.98	21.5509	5		326.34	54.8886	5			2.617		162.7	16.9454	5		115.9	99.4052	5			2.617		3212.97	60.2753	3		3363.93	140.446	3			2.617		2461.87	227.401	3		1681.73	55.8845	3			2.617		251.76	18.9014	5
2.633		124.8	23.8386	5		328.52	22.8683	5			2.633		163.48	16.9105	5		102.54	71.9882	5			2.633		3188.6	57.7152	3		3429.57	138.942	3			2.633		2404.4	243.777	3		1681.6	33.3241	3			2.633		256.3	18.4429	5
2.65		134.16	19.3468	5		377.2	27.4681	5			2.65		153.26	19.6862	5		214.16	104.238	5			2.65		3281.23	53.7815	3		3407.83	146.045	3			2.65		2425.23	231.125	3		1556.5	49.2	3			2.65		244.54	17.9663	5
2.667		128.1	19.5044	5		365.64	54.1736	5			2.667		160.68	15.9757	5		168.08	86.0871	5			2.667		3221.07	55.5693	3		3323.8	66.0473	3			2.667		2450	239.507	3		1609.27	102.124	3			2.667		230.44	18.0764	5
2.683		131.44	18.1824	5		369.78	29.4305	5			2.683		149.52	15.9137	5		123.16	62.0755	5			2.683		3205.2	82.1091	3		3381.63	114.825	3			2.683		2448.37	210.917	3		1560.03	37.3283	3			2.683		235.24	18.217	5
2.7		124.56	15.9235	5		388.88	27.4633	5			2.7		157.2	18.3266	5		184.58	60.5518	5			2.7		3266	76.6195	3		3321.93	123.845	3			2.7		2379.33	294.361	3		1637.2	39.8643	3			2.7		232.18	14.7585	5
2.717		127.08	13.4242	5		397.92	17.2938	5			2.717		143.72	18.8045	5		155.38	74.1469	5			2.717		3155.2	60.8615	3		3225.7	107.558	3			2.717		2369.3	240.245	3		1664.13	25.8872	3			2.717		227.22	18.3559	5
2.733		122.98	16.7654	5		341.1	41.4428	5			2.733		146.04	12.3725	5		145.5	79.1247	5			2.733		3298.23	80.8433	3		3293.63	162.829	3			2.733		2384.6	236.166	3		1675.3	25.046	3			2.733		227.92	12.6614	5
2.75		118.64	18.1128	5		365.44	45.6555	5			2.75		148.6	12.7519	5		102.54	93.5453	5			2.75		3175.7	59.1355	3		3198.07	132.14	3			2.75		2378.77	250.907	3		1591.6	64.1555	3			2.75		210.2	16.4304	5
2.767		126.14	20.2888	5		360.84	45.1652	5			2.767		150.76	15.3924	5		143.62	68.5246	5			2.767		3173.6	92.8735	3		3317.87	214.644	3			2.767		2343.83	229.02	3		1568.43	30.8734	3			2.767		206.38	15.1943	5
2.783		123.5	16.7637	5		381.88	60.2486	5			2.783		157.74	18.2295	5		169.38	58.4884	5			2.783		3203.7	57.5578	3		3347.23	207.885	3			2.783		2393.9	194.67	3		1463.27	86.2624	3			2.783		207.68	15.0108	5
2.8		120.5	19.4507	5		376.78	36.2765	5			2.8		150.5	13.5657	5		211.58	92.7084	5			2.8		3192.63	82.3744	3		3261.33	255.397	3			2.8		2352.3	262.513	3		1545.17	224.002	3			2.8		199.4	13.8554	5
2.817		118.02	18.4858	5		357.22	39.8004	5			2.817		143.24	9.25082	5		131.18	84.5753	5			2.817		3258.87	87.077	3		3386.97	155.754	3			2.817		2324.9	218.744	3		1499.77	117.272	3			2.817		193.12	13.5408	5
2.833		122.48	17.2721	5		347.62	46.1723	5			2.833		143.7	11.7998	5		156.8	87.9703	5			2.833		3214.53	63.8313	3		3335.3	121.705	3			2.833		2367.53	233.036	3		1606.47	108.444	3			2.833		194.1	14.3164	5
2.85		120.9	16.4788	5		370.42	21.7646	5			2.85		136.16	13.7275	5		184.74	49.48	5			2.85		3249.33	83.9728	3		3389.3	168.272	3			2.85		2398.2	178.9	3		1694.97	20.9617	3			2.85		187.6	12.2081	5
2.867		116.12	20.8415	5		360.42	23.0947	5			2.867		150.36	15.9288	5		209.34	59.2907	5			2.867		3113.87	50.0041	3		3264.97	119.265	3			2.867		2401.67	221.165	3		1602.5	45.326	3			2.867		189.02	13.7526	5
2.883		115.74	17.1147	5		386.28	25.3942	5			2.883		130.62	14.3878	5		191.86	73.5644	5			2.883		3243.17	47.1985	3		3254.53	73.8762	3			2.883		2400.6	252.445	3		1614.5	87.102	3			2.883		186	11.6709	5
2.9		112.58	19.2241	5		344.72	37.7361	5			2.9		140.38	13.3908	5		232.12	71.4348	5			2.9		3150.9	62.7965	3		3405.4	70.8873	3			2.9		2411.03	231.395	3		1603.87	120.906	3			2.9		176.68	13.7207	5
2.917		115.62	16.3261	5		375.66	40.8674	5			2.917		129.54	16.6724	5		244.28	29.3651	5			2.917		3085.53	47.1198	3		3287.97	184.808	3			2.917		2336.23	256.298	3		1507.4	64.4633	3			2.917		174.28	14.7446	5
2.933		111.74	18.2814	5		374.14	41.4697	5			2.933		136.58	15.1746	5		168.1	96.4786	5			2.933		3161.9	71.8677	3		3249.47	139.614	3			2.933		2297.83	200.3	3		1655.67	95.9773	3			2.933		176.54	14.4847	5
2.95		106.56	20.1985	5		391.04	31.9988	5			2.95		130.54	15.8996	5		167.48	54.6658	5			2.95		3220.93	71.6749	3		3358.67	95.0614	3			2.95		2382.2	252.152	3		1567.03	68.0976	3			2.95		175.8	10.5166	5
2.967		104.12	19.6631	5		376.4	35.4566	5			2.967		130.32	10.9107	5		206.38	66.9997	5			2.967		3082.43	62.5908	3		3385.93	159.291	3			2.967		2278.87	271.551	3		1608.93	57.0854	3			2.967		165.24	12.5106	5
2.983		102.34	18.2005	5		366.66	28.0976	5			2.983		131.88	16.3571	5		300.62	88.5264	5			2.983		3127.03	61.9925	3		3325.5	135.4	3			2.983		2289.8	220.602	3		1640.23	84.1792	3			2.983		159.9	14.4158	5
3		110.06	14.2111	5		381	38.9868	5			3		133.96	16.1268	5		302.24	86.7311	5			3		3253.9	64.0433	3		3300.9	143.267	3			3		2314.47	250.956	3		1586.27	46.2463	3			3		153.98	10.7021	5
3.017		116.34	12.3682	5		359.3	35.2973	5			3.017		119.8	13.1826	5		244.74	83.6982	5			3.017		3106.73	56.02	3		3329.1	28.4944	3			3.017		2313.53	230.934	3		1541.7	94.9233	3			3.017		147.62	11.9224	5
3.033		115.74	12.8983	5		411.56	43.1256	5			3.033		125.54	12.2795	5		203.46	70.7912	5			3.033		3211.3	67.7267	3		3335.87	75.3071	3			3.033		2343.27	231.697	3		1611.4	74.5131	3			3.033		145.36	11.5133	5
3.05		106.06	20.4128	5		314.6	36.5062	5			3.05		125.24	13.2593	5		297.48	54.9126	5			3.05		3209.77	49.2499	3		3259.8	66.2553	3			3.05		2315.33	264.978	3		1570.8	69.4693	3			3.05		147.26	11.5466	5
3.067		104.44	18.8856	5		366.06	28.9351	5			3.067		135.78	15.4095	5		291.14	65.1313	5			3.067		3182.67	76.2826	3		3261.63	100.258	3			3.067		2288.9	225.573	3		1605.1	47.8548	3			3.067		144.4	9.19712	5
3.083		99.7	21.5062	5		377.24	32.3495	5			3.083		113.02	13.5964	5		264.26	76.6688	5			3.083		3233.27	56.993	3		3266.37	41.7217	3			3.083		2362.37	236.075	3		1540.4	10.591	3			3.083		140.62	11.9427	5
3.1		101.66	19.7535	5		344.82	40.3189	5			3.1		127.38	10.3578	5		215.18	68.6974	5			3.1		3208.93	46.8004	3		3210	166.482	3			3.1		2321.47	308.582	3		1516.67	87.6185	3			3.1		139.98	13.1481	5
3.117		98.08	16.7472	5		353.98	41.793	5			3.117		123.88	14.3618	5		136	40.1234	5			3.117		3258.53	70.998	3		3215.37	102.261	3			3.117		2293.13	192.903	3		1625.73	57.961	3			3.117		143.54	11.2984	5
3.133		98.92	18.0551	5		333.3	36.1057	5			3.133		120.66	17.8153	5		232.1	42.4375	5			3.133		3131.57	74.332	3		3240.1	117.992	3			3.133		2355	203.303	3		1575.17	88.8365	3			3.133		135.96	11.1021	5
3.15		100.62	14.082	5		384.62	50.5782	5			3.15		123.84	12.1189	5		222.4	37.9989	5			3.15		3222.33	58.4261	3		3188.47	112.95	3			3.15		2317.1	285.572	3		1609.53	41.0195	3			3.15		132.98	12.2968	5
3.167		92.88	17.7614	5		368.2	50.1192	5			3.167		121.74	15.2761	5		148.5	62.6381	5			3.167		3197.53	59.2903	3		3152.77	148.181	3			3.167		2297.03	271.141	3		1544.63	60.763	3			3.167		133.62	11.3625	5
3.183		101.02	15.002	5		386.08	37.1029	5			3.183		123.32	12.9173	5		187.34	40.2065	5			3.183		3052.67	51.9391	3		3196.27	97.5667	3			3.183		2287.83	200.101	3		1564.07	70.4798	3			3.183		133.72	14.2069	5
3.2		96.06	13.792	5		361.58	42.1915	5			3.2		123.72	10.0062	5		198.36	69.4547	5			3.2		3180.23	64.2461	3		3095.1	80.1919	3			3.2		2316.4	217.563	3		1532.23	46.5558	3			3.2		132.56	10.8659	5
3.217		100.56	16.5621	5		347.84	37.6244	5			3.217		116.9	9.92618	5		213.98	39.8556	5			3.217		3131.3	56.6909	3		3190.87	155.201	3			3.217		2262.7	233.421	3		1660.93	37.9967	3			3.217		121.54	10.0155	5
3.233		95.64	14.629	5		376.34	24.8951	5			3.233		109.6	9.52875	5		138.68	74.0484	5			3.233		3153	81.9076	3		3262.37	188.174	3			3.233		2286.97	217.081	3		1662.53	99.9457	3			3.233		120.3	10.8183	5
3.25		94.16	17.9953	5		328.44	60.272	5			3.25		118.2	12.2576	5		152	38.3563	5			3.25		3118.07	68.7389	3		3202.23	219.432	3			3.25		2328.23	237.61	3		1607.87	57.5325	3			3.25		118.46	11.1919	5
3.267		92.24	18.5622	5		415.9	30.1816	5			3.267		103.4	9.79474	5		208.92	45.2165	5			3.267		3090.37	57.7903	3		3262.57	169.976	3			3.267		2262.43	251.999	3		1566.67	74.6337	3			3.267		116.78	10.535	5
3.283		93.72	16.6495	5		356.8	43.0742	5			3.283		108.78	10.4604	5		172.82	72.7775	5			3.283		3169.1	121.325	3		3419.5	240.768	3			3.283		2275.67	223.422	3		1487.23	39.2792	3			3.283		121.88	11.2729	5
3.3		97.08	16.5046	5		332.5	62.6843	5			3.3		123.78	17.1466	5		180.6	96.4694	5			3.3		3044.07	59.0713	3		3371.1	206.963	3			3.3		2222.23	222.614	3		1522.17	65.0001	3			3.3		116.16	8.5115	5
3.317		94.8	14.3192	5		321.34	52.0486	5			3.317		121.9	11.4426	5		230.46	79.4572	5			3.317		3130.07	69.3682	3		3261.23	186.76	3			3.317		2251.17	255.968	3		1567.53	38.3018	3			3.317		115.74	11.798	5
3.333		85.58	17.5415	5		281.08	60.1188	5			3.333		112.14	12.3611	5		229.72	66.6103	5			3.333		3020	79.5949	3		3351.6	242.488	3			3.333		2218.9	272.53	3		1625.13	63.0862	3			3.333		112.6	7.3435	5
3.35		91.9	16.0992	5		343.96	42.2518	5			3.35		107.84	9.93336	5		293.54	101.898	5			3.35		3066.67	65.1235	3		3313.5	104.621	3			3.35		2268.03	226.1	3		1547.17	53.395	3			3.35		111.78	12.7061	5
3.367		87.1	15.7176	5		295.02	53.5964	5			3.367		109.26	10.7076	5		186.04	90.6528	5			3.367		3109.97	61.0303	3		3331.6	181.413	3			3.367		2328.03	254.011	3		1593.67	47.3116	3			3.367		109.42	8.1666	5
3.383		93.06	18.7496	5		366.06	41.72	5			3.383		112.58	13.8308	5		182.5	95.1837	5			3.383		3102.2	68.2469	3		3295.13	215.946	3			3.383		2299.9	277.285	3		1509.13	33.2554	3			3.383		106.7	10.155	5
3.4		86.5	15.3126	5		360.34	11.9999	5			3.4		108	9.78259	5		205.32	65.6201	5			3.4		3057.6	61.317	3		3219.53	222.373	3			3.4		2280.73	195.177	3		1552.63	91.6731	3			3.4		104.8	9.66442	5
3.417		89.24	16.9323	5		276.82	42.9463	5			3.417		107.82	13.8344	5		270.5	75.3315	5			3.417		3155.23	57.4773	3		3255.7	219.899	3			3.417		2261.03	286.685	3		1542.33	17.7367	3			3.417		107.88	8.28024	5
3.433		84.52	15.5614	5		289.08	36.9572	5			3.433		110.54	9.62863	5		187.52	85.3996	5			3.433		3037.83	47.8297	3		3266	127.971	3			3.433		2228.7	258.105	3		1479.63	63.0245	3			3.433		106.08	10.5865	5
3.45		86.66	13.9577	5		323.68	13.1616	5			3.45		102.86	9.05989	5		186.72	56.6593	5			3.45		3064.7	59.1426	3		3223.57	127.763	3			3.45		2205.53	298.131	3		1549.9	75.8173	3			3.45		99.44	7.43254	5
3.467		84.28	16.8404	5		382.7	26.0647	5			3.467		107.6	10.4768	5		191.98	48.4735	5			3.467		3109	78.5599	3		3177.8	125.842	3			3.467		2178.03	250.182	3		1747.17	96.7661	3			3.467		101.24	12.8281	5
3.483		80.36	18.1167	5		320.18	49.2113	5			3.483		106.2	8.74911	5		201.98	59.9534	5			3.483		3041.93	57.3669	3		3138.13	60.2458	3			3.483		2184.7	250.053	3		1496.77	34.8819	3			3.483		102.78	6.99174	5
3.5		84.2	16.9755	5		312.74	37.5261	5			3.5		114.16	8.41318	5		262.6	67.3425	5			3.5		3040.83	51.6134	3		3082.47	83.7345	3			3.5		2189.73	259.239	3		1603.07	96.7389	3			3.5		91.98	11.696	5
3.517		82.86	14.1187	5		322.84	47.013	5			3.517		107.44	12.7013	5		259.32	71.8651	5			3.517		3043.37	51.5707	3		3163.03	89.9957	3			3.517		2209	224.448	3		1564.8	62.7185	3			3.517		95.46	8.19863	5
3.533		85.28	16.3124	5		341	31.1482	5			3.533		102.54	9.63767	5		175.5	64.9387	5			3.533		3011.77	67.6127	3		3079	114.591	3			3.533		2222.5	245.845	3		1614.97	30.6232	3			3.533		95.24	8.84735	5
3.55		83.26	13.4779	5		352.48	37.0765	5			3.55		99.1	13.6019	5		304.76	70.0718	5			3.55		3035.77	56.0448	3		3024.1	139.56	3			3.55		2200.73	232.764	3		1625.7	35.0023	3			3.55		93.04	9.56246	5
3.567		86.34	15.1329	5		312.46	44.8925	5			3.567		102.96	10.2269	5		226.08	82.7415	5			3.567		3102	57.9426	3		3175.63	146.166	3			3.567		2199.47	210.223	3		1595.97	19.7802	3			3.567		92.18	10.0473	5
3.583		78.92	16.2376	5		345.92	45.4435	5			3.583		102.1	12.9841	5		236.62	34.9115	5			3.583		3101.77	43.5726	3		3106	124.821	3			3.583		2250.17	276.931	3		1560.93	30.0613	3			3.583		89.9	7.26492	5
3.6		76.88	17.9995	5		326.7	23.1711	5			3.6		99.48	12.2261	5		246.28	89.084	5			3.6		3043.13	78.7885	3		3106.27	138.714	3			3.6		2142.7	241.251	3		1625.33	40.5737	3			3.6		83.06	11.1728	5
3.617		77.14	14.7975	5		326.04	45.2888	5			3.617		100.94	8.87088	5		239.66	70.75	5			3.617		3042.97	76.0552	3		3107.37	161.967	3			3.617		2184.17	252.238	3		1628.57	25.1059	3			3.617		86	7.73835	5
3.633		75.06	16.4553	5		321.18	23.4307	5			3.633		89.56	7.39409	5		307.08	58.3834	5			3.633		3113.77	52.7426	3		3138.57	168.867	3			3.633		2126.4	249.118	3		1637.97	27.3428	3			3.633		86.4	8.41998	5
3.65		74.8	17.3235	5		342.5	33.5837	5			3.65		100.42	10.6865	5		163.38	45.4888	5			3.65		2931	59.2883	3		3129.4	79.7692	3			3.65		2199.7	208.189	3		1686.8	27.654	3			3.65		84.72	9.78051	5
3.667		77.6	14.5706	5		348.12	25.6767	5			3.667		92.54	14.7497	5		230.24	58.7359	5			3.667		2960.23	54.9588	3		3087.77	117.747	3			3.667		2234.13	208.989	3		1648.87	12.9843	3			3.667		89.44	10.1511	5
3.683		78.1	13.93	5		337.96	45.5211	5			3.683		103.28	12.4262	5		282.84	55.2486	5			3.683		3052.13	61.406	3		3147.07	124.552	3			3.683		2179.63	210.12	3		1631.27	54.0325	3			3.683		86.88	7.40584	5
3.7		80.86	15.0349	5		328.6	28.995	5			3.7		92.98	9.30373	5		218	43.94	5			3.7		2985.1	54.9988	3		3105.73	141.253	3			3.7		2154.77	208.656	3		1604.4	89.4422	3			3.7		76.58	7.47492	5
3.717		74.62	13.7501	5		283.1	51.077	5			3.717		98.34	10.2951	5		306.7	80.5354	5			3.717		2989.9	41.0094	3		3073.27	104.828	3			3.717		2174.93	206.962	3		1641	36.4261	3			3.717		78.94	9.48628	5
3.733		79.26	15.7671	5		357.46	29.7545	5			3.733		93	10.8362	5		221.36	32.3758	5			3.733		3028.87	57.5797	3		3077.67	114.108	3			3.733		2174.37	256.181	3		1508.07	58.3678	3			3.733		82.9	7.96021	5
3.75		78.58	11.3478	5		327.64	21.9887	5			3.75		85.6	12.1209	5		232.66	77.6873	5			3.75		2987	61.3279	3		3056.43	165.298	3			3.75		2183.73	241.983	3		1503.13	75.9084	3			3.75		84.5	10.2603	5
3.767		72.12	17.6801	5		315.38	33.1459	5			3.767		94.14	11.6875	5		247.44	30.5637	5			3.767		2991.07	58.1765	3		3102.5	150.703	3			3.767		2129.03	297.773	3		1509.9	94.5104	3			3.767		86.8	4.86559	5
3.783		74.34	16.0844	5		356.08	33.7383	5			3.783		89.7	9.51646	5		249.5	61.854	5			3.783		2995.93	68.3738	3		3136.43	169.002	3			3.783		2114.37	233.611	3		1548.53	62.7365	3			3.783		80.1	9.04351	5
3.8		72.66	16.158	5		310.48	37.221	5			3.8		89.54	15.6611	5		303.9	40.3802	5			3.8		2885.2	47.0768	3		3087.2	143.175	3			3.8		2107.57	302.634	3		1457.33	84.3984	3			3.8		78.72	8.00671	5
3.817		83.04	13.9736	5		331.36	52.4077	5			3.817		81.64	8.09818	5		299.26	28.5303	5			3.817		3022.33	45.3303	3		3125.07	187.938	3			3.817		2069.17	267.204	3		1630.87	78.0468	3			3.817		75.96	8.83213	5
3.833		72.14	16.4596	5		311.08	38.8417	5			3.833		91	12.1735	5		302.9	59.6386	5			3.833		2926.1	60.2134	3		3111.1	95.6237	3			3.833		2096.27	234.2	3		1593.5	83.6222	3			3.833		78.86	8.73502	5
3.85		72.2	16.8964	5		325.84	61.4731	5			3.85		84.72	11.3616	5		370.96	33.5149	5			3.85		2927.27	79.0478	3		3049.03	126.132	3			3.85		2126.83	253.452	3		1504.9	134.259	3			3.85		79.62	8.36298	5
3.867		75.82	13.2695	5		339.98	34.6158	5			3.867		90.48	12.1503	5		300.6	51.1008	5			3.867		3028.2	57.9964	3		2990.2	77.7741	3			3.867		2167.1	238.586	3		1584.27	61.9325	3			3.867		78.12	8.59159	5
3.883		75.52	14.7502	5		313.48	23.1435	5			3.883		91.34	12.6847	5		257.16	32.7962	5			3.883		2971.67	46.0519	3		3039.37	91.8654	3			3.883		2095.03	257.975	3		1622.1	74.6084	3			3.883		82.02	8.3955	5
3.9		69.1	16.8429	5		300.02	42.6362	5			3.9		102.12	9.45914	5		293.58	37.3748	5			3.9		3050.13	46.4503	3		3014.5	91.2697	3			3.9		2119.1	196.561	3		1626.83	36.0257	3			3.9		78.52	6.79672	5
3.917		72.26	14.9416	5		308.88	26.2306	5			3.917		85.84	11.4321	5		247.62	45.8783	5			3.917		3017.9	52.6584	3		2913.63	82.3521	3			3.917		2089.27	261.987	3		1508.17	22.8247	3			3.917		73.32	9.14436	5
3.933		70.78	16.2293	5		313.72	34.0113	5			3.933		95.64	11.3082	5		276.28	31.5906	5			3.933		2997.93	60.9083	3		2966.83	64.8083	3			3.933		2101.77	198.773	3		1496.53	40.5279	3			3.933		75.06	6.5715	5
3.95		70.06	16.4312	5		320.8	32.3097	5			3.95		89.82	10.1685	5		282.22	73.0578	5			3.95		2996.7	67.6419	3		3043.47	97.0383	3			3.95		2169.47	234.496	3		1618.8	70.8184	3			3.95		66.34	6.85964	5
3.967		68.5	15.7181	5		331.8	29.924	5			3.967		81.16	10.2676	5		247.18	32.3693	5			3.967		2986.43	50.6753	3		2943.5	122.52	3			3.967		2070.83	288.007	3		1598.2	61.4752	3			3.967		64.76	10.7968	5
3.983		70.74	13.0019	5		296.8	42.5811	5			3.983		82.28	9.40401	5		236.38	66.0987	5			3.983		3058.73	54.8385	3		3020.1	140.034	3			3.983		2018	266.726	3		1643.27	12.8885	3			3.983		73.82	7.77781	5
4		67.26	17.6865	5		320.48	37.6644	5			4		81.2	9.59239	5		211.92	63.041	5			4		2917.63	62.9932	3		2981	127.82	3			4		2068.8	220.996	3		1698.37	124.242	3			4		67.82	8.74291	5
4.017		64.48	16.7409	5		314.1	36.036	5			4.017		86.9	12.0567	5		235.98	42.4111	5			4.017		3011.97	45.5	3		2905.4	74.4039	3			4.017		2099.73	231.567	3		1595.6	62.5448	3			4.017		72.42	7.67407	5
4.033		66.38	17.796	5		359.94	33.0008	5			4.033		80.16	6.77396	5		285.18	52.9348	5			4.033		3009.9	67.9457	3		3073.57	81.9141	3			4.033		2030.13	287.956	3		1561.2	89.0885	3			4.033		72.96	6.93625	5
4.05		70.72	14.7093	5		306.92	39.7687	5			4.05		86.42	12.2231	5		255.44	42.3559	5			4.05		2910.83	50.6868	3		2985.33	122.811	3			4.05		2045.57	219.528	3		1605.97	33.0172	3			4.05		64.02	7.38616	5
4.067		63.46	16.597	5		326	28.0794	5			4.067		79.14	7.68255	5		294.14	55.7523	5			4.067		2960.1	67.7237	3		2927.57	119.959	3			4.067		2113	180.473	3		1570.77	63.7999	3			4.067		65.52	6.83925	5
4.083		65.88	12.3228	5		345.14	33.6177	5			4.083		85.56	12.7564	5		181.58	44.0392	5			4.083		2916.97	59.8807	3		3028.5	109.115	3			4.083		2086.7	295.848	3		1612.77	23.557	3			4.083		65.04	7.96107	5
4.1		59.68	16.0206	5		339.08	16.7994	5			4.1		90.52	9.57253	5		167.68	49.8958	5			4.1		2925.67	54.637	3		3034.57	94.2265	3			4.1		2078.47	190.857	3		1488.9	21.7945	3			4.1		60.04	11.0416	5
4.117		64.32	14.0257	5		292.2	33.1559	5			4.117		86.46	15.5804	5		165.64	35.75	5			4.117		2850.27	52.0677	3		3081.87	151.125	3			4.117		2078.9	275.331	3		1627.73	52.0531	3			4.117		65.14	8.61926	5
4.133		59.52	14.7617	5		311.46	50.2285	5			4.133		81.8	10.8072	5		88.1	49.2331	5			4.133		2918.83	58.8388	3		3086.07	145.568	3			4.133		2042.9	234.804	3		1607.73	62.6975	3			4.133		66.08	6.22996	5
4.15		63.24	14.6188	5		271.04	41.8973	5			4.15		79.96	8.62813	5		227.46	37.7064	5			4.15		2947.3	65.4824	3		3106.83	118.211	3			4.15		2076.63	211.263	3		1549.87	48.2776	3			4.15		61.26	8.64584	5
4.167		66.32	12.886	5		325.84	49.0741	5			4.167		82.6	9.47317	5		187.14	38.2302	5			4.167		2857	50.1075	3		3068.53	54.9554	3			4.167		2062.57	249.429	3		1518.23	93.0342	3			4.167		66.22	8.09138	5
4.183		64.76	15.1972	5		302.08	25.4242	5			4.183		77.94	11.6662	5		187.98	42.022	5			4.183		2953.43	76.0493	3		3069.6	79.2216	3			4.183		2117.7	221.1	3		1506.1	101.621	3			4.183		62.28	5.15397	5
4.2		65.56	14.5373	5		352.84	30.6753	5			4.2		73.04	10.9021	5		131.24	35.6747	5			4.2		2867.4	37.951	3		3024.93	17.3125	3			4.2		2085.97	234.813	3		1459.47	41.4602	3			4.2		52.84	8.26242	5
4.217		60.46	14.3927	5		289.3	46.5858	5			4.217		78.16	13.9623	5		138.02	85.6054	5			4.217		2898.27	57.1354	3		2968.37	60.2811	3			4.217		2006.3	251.138	3		1608	51.0888	3			4.217		53.1	10.8906	5
4.233		61.62	14.8489	5		299.1	37.2872	5			4.233		78.3	11.0029	5		245.38	45.7942	5			4.233		2905.6	54.5767	3		3023.6	74.1017	3			4.233		1999.53	294.617	3		1625.03	48.6881	3			4.233		64.02	4.36387	5
4.25		58.94	14.2525	5		334.68	32.3489	5			4.25		79.08	7.2562	5		219.18	52.2032	5			4.25		2910.7	53.4921	3		3016.37	114.285	3			4.25		1956	276.156	3		1555.93	41.9684	3			4.25		54.96	8.88294	5
4.267		56.98	17.2248	5		310.38	45.268	5			4.267		68.64	7.6366	5		233.62	75.0061	5			4.267		2834.47	48.2547	3		3009.1	141.571	3			4.267		1990.7	272.206	3		1564.73	63.7683	3			4.267		58.6	7.17565	5
4.283		57.72	16.3425	5		334.18	28.2854	5			4.283		66.12	12.1068	5		183.04	58.7973	5			4.283		2902.23	72.4823	3		2950.73	53.7713	3			4.283		1990.63	249.022	3		1577.67	23.5718	3			4.283		55.68	7.20412	5
4.3		56.46	17.6355	5		306.9	35.6246	5			4.3		75.62	11.235	5		223.06	57.3422	5			4.3		2912.63	69.4496	3		2987.3	49.8099	3			4.3		2015.77	187.809	3		1495.93	51.3112	3			4.3		58.86	11.6595	5
4.317		59.2	15.4011	5		297.22	40.2155	5			4.317		66.32	8.47151	5		132.84	51.6107	5			4.317		2853.87	63.9706	3		2999.43	53.9598	3			4.317		2093.7	213.666	3		1533.47	58.768	3			4.317		65.98	4.69909	5
4.333		59.24	14.0502	5		292.04	39.1179	5			4.333		70.46	11.0872	5		148.68	80.9684	5			4.333		2796.3	49.416	3		2957.37	108.981	3			4.333		2041.23	281.68	3		1542.93	44.9005	3			4.333		54.74	7.11229	5
4.35		63.95	10.9796	5		296.425	38.6781	5			4.35		69.18	9.3555	5		252.62	94.1731	5			4.35		2804.37	46.3682	3		2895.63	64.6356	3			4.35		1995.57	205.303	3		1555.67	63.6142	3			4.35		56.9	6.66506	5
4.367		73.125	8.81025	5		315.65	51.4229	5			4.367		66.76	9.26043	5		158.64	69.272	5			4.367		2905.03	50.919	3		2993.27	103.279	3			4.367		2001.1	272.864	3		1594.4	19.9174	3			4.367		52.64	8.80055	5
4.383		57.625	11.9076	5		330.15	28.8974	5			4.383		74.6	8.9787	5		245.26	66.3146	5			4.383		2769.6	59.0401	3		2974.77	77.4192	3			4.383		1972.23	261.717	3		1554.17	44.5664	3			4.383		55.02	8.75485	5
4.4		66.55	15.1784	5		299	51.6939	5			4.4		75.78	9.63335	5		253.24	87.5855	5			4.4		2818.27	54.5237	3		2924.77	125.478	3			4.4		2027.8	237.19	3		1635.13	27.7919	3			4.4		55.24	6.59648	5
4.417		57.35	15.3021	5		305.125	36.3252	5			4.417		63.84	10.4226	5		232.38	82.7969	5			4.417		2907.83	48.2625	3		2996.27	92.851	3			4.417		2014.7	277.812	3		1537.1	58.3137	3			4.417		55.28	8.86755	5
4.433		63.7	18.218	5		301.4	24.0751	5			4.433		73.5	11.6469	5		245.72	92.7922	5			4.433		2755.93	55.5799	3		3007.83	117.015	3			4.433		1979.3	255.182	3		1570.23	9.69714	3			4.433		52.88	10.3569	5
4.45		68.225	17.1479	5		348.025	26.8803	5			4.45		66.1	7.91025	5		156.1	54.1214	5			4.45		2876.33	58.0943	3		3069	187.96	3			4.45		1987.17	256.629	3		1485.17	41.0506	3			4.45		58.52	5.34962	5
4.467		75.5333	12.7817	5		314.867	31.7053	5			4.467		66.22	11.0968	5		175.22	29.1477	5			4.467		2890.27	40.5375	3		3060.03	187.736	3			4.467		1979.13	240.716	3		1506.13	117.178	3			4.467		49.62	6.47398	5
4.483		81.1333	16.1591	5		331.4	4.65682	5			4.483		63.4	8.50653	5		214.22	54.2686	5			4.483		2814.87	36.1542	3		3044.2	104.63	3			4.483		1964.3	272.008	3		1462.17	80.8776	3			4.483		49.86	8.07927	5
4.5		73.8	7.77547	5		335.267	19.9016	5			4.5		72.5	8.60116	5		211.08	45.0998	5			4.5		2829.53	46.5091	3		3145	129.739	3			4.5		2005.83	227.956	3		1556.87	125.645	3			4.5		51.76	8.27929	5
4.517		67.3	13.8451	5		301.367	33.4073	5			4.517		74.5	10.4375	5		215.2	44.5662	5			4.517		2890.27	48.0469	3		3038.03	132.883	3			4.517		2077.17	206.953	3		1514.7	34.1506	3			4.517		54.34	5.74122	5
4.533		67.3	13.2477	5		359.033	39.3874	5			4.533		64.52	7.97536	5		206.7	33.2884	5			4.533		2815.1	45.5818	3		3070.03	131.785	3			4.533		2083.5	220.603	3		1550.1	76.8138	3			4.533		49.54	7.48723	5
4.55		75.7667	17.0555	5		323.5	22.3712	5			4.55		64.34	9.20579	5		224.06	43.924	5			4.55		2883.53	46.9378	3		3085.67	62.6622	3			4.55		2051.33	225.735	3		1521.57	70.507	3			4.55		49.44	7.04114	5
4.567		74.8	19.4006	5		412.067	30.3653	5			4.567		63.22	7.95295	5		146.68	61.3982	5			4.567		2814.47	59.5995	3		3000.97	117.678	3			4.567		1964.97	293.514	3		1602	26.4904	3			4.567		46.64	6.47878	5
4.583		93.8667	19.2662	5		360.5	12.4267	5			4.583		65.14	11.0906	5		201.06	54.7762	5			4.583		2840.2	47.4546	3		3035.63	83.5921	3			4.583		1893.53	228.431	3		1470.07	72.3047	3			4.583		46.36	10.5672	5
4.6		83.9667	16.0524	5		396.5	29.809	5			4.6		69.16	12.9454	5		158.72	56.4795	5			4.6		2909.53	49.7678	3		3091.87	137.225	3			4.6		1985.13	164.804	3		1626.97	56.9152	3			4.6		50.18	6.91819	5
4.617		88.6	19.5231	5		355.233	26.1971	5			4.617		67.58	5.1855	5		127.72	27.2264	5			4.617		2782.9	48.8703	3		2960.9	64.9813	3			4.617		1996.7	291.653	3		1537.53	21.5237	3			4.617		48.8	6.33419	5
4.633		83.2667	14.0064	5		354.033	12.7939	5			4.633		64.7	9.9921	5		188.72	73.3776	5			4.633		2895.3	52.1849	3		2934.77	62.7603	3			4.633		1985.77	225.227	3		1584.83	65.4975	3			4.633		41.28	8.69019	5
4.65		79.8667	12.9437	5		354.5	45.8072	5			4.65		59.38	10.3724	5		129.44	68.762	5			4.65		2877.83	55.0504	3		3047.9	68.044	3			4.65		1953.97	244.315	3		1582.87	25.8599	3			4.65		43.42	5.80805	5
4.667		83.0333	20.0527	5		329.267	66.1663	5			4.667		68.18	12.1297	5		222.86	65.5294	5			4.667		2788.93	58.673	3		3038.37	148.279	3			4.667		1962.63	235.736	3		1462.73	57.2035	3			4.667		43.22	7.69574	5
4.683		81.8	16.2924	5		376.533	83.9333	5			4.683		60.12	10.4788	5		220.98	74.9483	5			4.683		2855.63	77.2249	3		2941.53	139.761	3			4.683		1919.63	255.419	3		1426.4	102.47	3			4.683		42.34	9.38662	5
4.7		89.5333	16.8634	5		328.067	73.8078	5			4.7		59.14	7.25249	5		214.54	61.7449	5			4.7		2859.7	62.2611	3		3061.37	124.621	3			4.7		1926.07	213.439	3		1417.27	58.0647	3			4.7		49.06	5.90107	5
4.717		93	16.5739	5		384.467	90.564	5			4.717		62.36	8.88817	5		172.92	57.8864	5			4.717		2818.53	72.3997	3		3089.97	97.6562	3			4.717		1958.1	253.468	3		1537.47	24.1422	3			4.717		48.2	7.44372	5
4.733		90.5667	17.0788	5		327.233	66.0315	5			4.733		72.36	10.041	5		296.56	55.1024	5			4.733		2769.63	42.484	3		2931.47	78.4709	3			4.733		1950.3	215.202	3		1409.07	30.2409	3			4.733		48.58	8.42908	5
4.75		86.6667	16.7287	5		343	54.4206	5			4.75		65.08	11.5806	5		195.7	39.535	5			4.75		2873	96.5462	3		2938.57	144.597	3			4.75		1963.43	283.172	3		1533	12.2442	3			4.75		48.68	6.01061	5
4.767		90.9667	17.2445	5		323.833	70.3514	5			4.767		56.3	6.19395	5		217.6	42.5204	5			4.767		2772.3	54.8079	3		3059.27	134.703	3			4.767		1904.1	226.712	3		1461.1	28.0867	3			4.767		46.52	7.43071	5
4.783		89.3333	15.6055	5		270.133	39.6457	5			4.783		68.54	11.234	5		301.54	78.5985	5			4.783		2782.4	60.8862	3		2997.73	147.485	3			4.783		1938.57	231.011	3		1465.47	93.801	3			4.783		44.64	7.59438	5
4.8		82.4667	16.3711	5		290.567	61.0637	5			4.8		59.04	8.07754	5		219.78	84.9766	5			4.8		2696.93	29.9964	3		2918.7	142.893	3			4.8		1994.3	209.253	3		1529.33	62.5395	3			4.8		48.04	6.40895	5
4.817		71.5667	17.2049	5		184.033	70.1436	5			4.817		63.74	10.6785	5		169.58	37.6344	5			4.817		2854.9	34.2667	3		2948.13	136.191	3			4.817		1934.9	289.44	3		1509.33	95.7782	3			4.817		47.88	10.861	5
4.833		71.2	12.3103	5		248	93.1585	5			4.833		63.42	8.33321	5		173.48	46.6061	5			4.833		2739.73	48.4357	3		3021.03	96.6757	3			4.833		1890.7	230.153	3		1404.13	17.272	3			4.833		51.36	5.31466	5
4.85		76.9333	17.1017	5		207.067	61.1033	5			4.85		67.18	10.9557	5		191.38	53.9226	5			4.85		2731.53	68.6328	3		2907.87	128.595	3			4.85		1941.9	226.151	3		1531.47	4.81398	3			4.85		45.54	7.28516	5
4.867		68.7	16.16	5		201.733	96.263	5			4.867		61.54	9.36283	5		120.26	32.1531	5			4.867		2810.27	69.3729	3		2898.07	85.2845	3			4.867		1894.57	290.921	3		1551.37	22.8962	3			4.867		43.88	8.07746	5
4.883		79.2333	17.1802	5		232.433	76.1691	5			4.883		61.66	13.0825	5		49.42	44.1489	5			4.883		2761.33	58.9801	3		2992.37	92.4132	3			4.883		1927.3	185.981	3		1342.47	74.2818	3			4.883		40.66	5.38763	5
4.9		77.1667	16.3295	5		212.6	74.4939	5			4.9		52.3	13.933	5		170.44	50.9879	5			4.9		2838.57	35.1826	3		2855.1	85.2578	3			4.9		1926.97	288.438	3		1532.47	71.0418	3			4.9		36.16	9.5798	5
4.917		77.4333	17.377	5		248.333	93.5397	5			4.917		50.14	10.452	5		188.84	66.1755	5			4.917		2728.23	49.2482	3		2960.93	117.731	3			4.917		1952.03	210.98	3		1377.53	29.115	3			4.917		42.88	8.50155	5
4.933		78.7	14.9795	5		239.7	87.6722	5			4.933		58.8	11.5244	5		202.68	48.2527	5			4.933		2725.77	48.3601	3		2919.83	69.5783	3			4.933		1980.03	259.119	3		1382.8	55.9293	3			4.933		44.02	4.17222	5
4.95		82.3333	13.4974	5		218.267	70.7247	5			4.95		61	7.62188	5		161.12	76.3544	5			4.95		2798.17	72.3502	3		2878.17	146.904	3			4.95		1910.3	288.611	3		1461.07	46.7311	3			4.95		35.92	8.713	5
4.967		75.2	12.984	5		222.833	73.9029	5			4.967		58.36	7.98427	5		162.36	47.2722	5			4.967		2777	47.9511	3		2984.73	126.942	3			4.967		1833.7	246.501	3		1589.87	48.9267	3			4.967		41.86	6.88176	5
4.983		79.5	13.2237	5		224.8	89.1651	5			4.983		50.56	7.43065	5		96.08	75.3161	5			4.983		2721.97	49.0317	3		2891.73	144.091	3			4.983		1858.5	279.992	3		1441.1	122.415	3			4.983		43.44	5.54839	5
5		62.85	2.62469	5		137.05	54.9288	5			5		60.08	7.27416	5		66.46	21.5821	5			5		2728.07	53.307	3		2879.1	165.227	3			5		1899.27	205.841	3		1391.43	43.4538	3			5		37.16	7.93313	5
[truncated: 52 more columns]

## Sheet: Fig 3B
Figure 3B a-d B/A ratio																		Figure 3B e-h B/A ratio																		Figure 3B i-l B/A ratio
	7R-1000				4R-1000				3R-1000				0R-1000						7R-250				4R-250				3R-250				0R-250						7R-62.5				4R-62.5				3R-62.5				0R-62.5
Time (min)	Mean	SEM	n		Mean	SEM	n		Mean	SEM	n		Mean	SEM	n			Time (min)	Mean	SEM	n		Mean	SEM	n		Mean	SEM	n		Mean	SEM	n			Time (min)	Mean	SEM	n		Mean	SEM	n		Mean	SEM	n		Mean
0	0.152772	0.0573369	5		0.0370659	0.0147523	5		0.177774	0.0792457	3		0.10075	0.105833	3			0	0.033524	0.0121995	5		0.0625553	0.0153536	4		0.0830806	0.0273721	4		0.10491	0.0538307	3			0	0.0432392	0.00701422	4		0.0613872	0.0203192	4		0.0461549	0.00623497	3		0.0715262
0.017	0.21183	0.065508	5		0.0682471	0.0328325	5		0.3297	0.136295	3		0.144616	0.132503	3			0.017	0.0424258	0.00733976	5		0.0638352	0.0228312	4		0.100819	0.0356416	4		0.124998	0.0802377	3			0.017	0.0536348	0.00299035	4		0.0685314	0.0195198	4		0.0484854	0.0103803	3		0.0839598
0.033	0.275399	0.0889025	5		0.116626	0.0607422	5		0.426536	0.135519	3		0.195291	0.173017	3			0.033	0.0465093	0.00952988	5		0.0723471	0.032847	4		0.137358	0.0624959	4		0.150839	0.0674577	3			0.033	0.043139	0.0058689	4		0.0632293	0.0174383	4		0.0444827	0.00707952	3		0.107047
0.05	0.375299	0.116091	5		0.241553	0.0891284	5		0.57852	0.15262	3		0.25042	0.188365	3			0.05	0.055696	0.00680997	5		0.118048	0.0387466	4		0.197765	0.0869699	4		0.221387	0.0836525	3			0.05	0.0476561	0.0113567	4		0.0713643	0.0167273	4		0.0514652	0.00842635	3		0.131654
0.067	0.461757	0.134212	5		0.409491	0.126594	5		0.717683	0.151934	3		0.294075	0.178266	3			0.067	0.0557239	0.00340332	5		0.123096	0.0500614	4		0.274206	0.115155	4		0.298311	0.10486	3			0.067	0.0556771	0.00619645	4		0.0618285	0.00689754	4		0.0550964	0.00524493	3		0.155726
0.083	0.588245	0.168731	5		0.634796	0.171647	5		0.850229	0.149494	3		0.36948	0.181653	3			0.083	0.0591482	0.00317826	5		0.136047	0.0690836	4		0.340275	0.134193	4		0.333627	0.106256	3			0.083	0.0591817	0.00443582	4		0.0714487	0.0150992	4		0.0624456	0.00823093	3		0.168394
0.1	0.728111	0.187685	5		0.927587	0.164361	5		0.99381	0.139762	3		0.477428	0.167813	3			0.1	0.0576455	0.00496022	5		0.185665	0.0746651	4		0.413094	0.151236	4		0.415798	0.105252	3			0.1	0.0611122	0.00433665	4		0.0769471	0.0161256	4		0.0668646	0.00528971	3		0.204507
0.117	0.905528	0.230948	5		1.24676	0.132537	5		1.07287	0.0926319	3		0.576455	0.114845	3			0.117	0.068516	0.0108914	5		0.234497	0.090827	4		0.485602	0.138975	4		0.433657	0.0538027	3			0.117	0.0647119	0.00919248	4		0.11212	0.0200726	4		0.0776533	0.00744531	3		0.226074
0.133	1.11418	0.267222	5		1.49048	0.0899867	5		1.17118	0.0725922	3		0.653936	0.0515469	3			0.133	0.0805359	0.00657547	5		0.301005	0.0992478	4		0.603515	0.168221	4		0.487742	0.0720874	3			0.133	0.062409	0.00988318	4		0.111366	0.0250547	4		0.0876432	0.00633783	3		0.232867
0.15	1.2674	0.267414	5		1.61922	0.0863916	5		1.21589	0.0352052	3		0.75596	0.0396283	3			0.15	0.0953132	0.00718695	5		0.375593	0.110575	4		0.697387	0.153844	4		0.540956	0.0396161	3			0.15	0.0657997	0.00719646	4		0.140708	0.0274776	4		0.0924468	0.00256115	3		0.247881
0.167	1.55111	0.326312	5		1.67339	0.100365	5		1.25534	0.0449955	3		0.77283	0.0488867	3			0.167	0.0960375	0.0102851	5		0.430543	0.119639	4		0.785385	0.140084	4		0.510384	0.0233615	3			0.167	0.0713728	0.0122233	4		0.156291	0.0215	4		0.104034	0.0108841	3		0.251596
0.183	1.77151	0.357389	5		1.57125	0.114751	5		1.25804	0.0504022	3		0.851567	0.0521595	3			0.183	0.121647	0.00818579	5		0.503692	0.124042	4		0.866909	0.105709	4		0.503459	0.0468193	3			0.183	0.0723215	0.00800793	4		0.178277	0.0277049	4		0.0972325	0.00925634	3		0.269623
0.2	1.98462	0.361767	5		1.53814	0.113928	5		1.25021	0.0531759	3		0.86535	0.0714722	3			0.2	0.121423	0.00859064	5		0.566078	0.115415	4		0.967428	0.0747208	4		0.587682	0.0824198	3			0.2	0.0710126	0.00796518	4		0.178093	0.0283368	4		0.104622	0.0149348	3		0.296772
0.217	2.20495	0.374967	5		1.42526	0.0909605	5		1.28382	0.0336673	3		0.792539	0.0495478	3			0.217	0.142694	0.00795606	5		0.665045	0.116205	4		1.045	0.0620412	4		0.540385	0.0516243	3			0.217	0.0749866	0.013926	4		0.218785	0.0290811	4		0.110471	0.0139347	3		0.286227
0.233	2.35555	0.349708	5		1.35379	0.101511	5		1.26026	0.05809	3		0.729316	0.0557141	3			0.233	0.16287	0.00715429	5		0.728096	0.10527	4		1.05007	0.0665525	4		0.52039	0.0752967	3			0.233	0.0743007	0.0117296	4		0.226566	0.0336107	4		0.116081	0.011	3		0.287368
0.25	2.49983	0.316008	5		1.30586	0.0846564	5		1.21269	0.0533833	3		0.825119	0.0377047	3			0.25	0.179147	0.00891786	5		0.825796	0.117576	4		1.08036	0.0800615	4		0.546245	0.0841482	3			0.25	0.0913661	0.0118044	4		0.237389	0.0327629	4		0.121135	0.0166485	3		0.307021
0.267	2.62192	0.302745	5		1.28029	0.0685765	5		1.20107	0.0646087	3		0.752069	0.0343928	3			0.267	0.186696	0.0199113	5		0.934615	0.13247	4		1.02829	0.0711035	4		0.5182	0.070495	3			0.267	0.090817	0.0111393	4		0.246067	0.0395161	4		0.133884	0.0187221	3		0.303292
0.283	2.67808	0.244772	5		1.17573	0.0972305	5		1.17024	0.0534862	3		0.754379	0.0398235	3			0.283	0.21333	0.00810594	5		1.0042	0.0964851	4		0.989219	0.0413153	4		0.487182	0.0871652	3			0.283	0.0895965	0.0104419	4		0.285665	0.0545644	4		0.135345	0.0258555	3		0.301341
0.3	2.69097	0.216374	5		1.14605	0.0872283	5		1.16371	0.0520478	3		0.736785	0.0729106	3			0.3	0.21947	0.0187283	5		1.06576	0.117384	4		0.993078	0.0539244	4		0.486395	0.0849643	3			0.3	0.0939926	0.0136436	4		0.315329	0.0475673	4		0.135052	0.0153987	3		0.302313
0.317	2.75199	0.18666	5		1.10568	0.0690883	5		1.19108	0.0365567	3		0.756378	0.0771355	3			0.317	0.241997	0.0197745	5		1.15781	0.101743	4		0.98733	0.0502754	4		0.47648	0.0693887	3			0.317	0.0933698	0.0141229	4		0.290922	0.0420474	4		0.14122	0.0217677	3		0.282711
0.333	2.7044	0.127186	5		1.07037	0.0899979	5		1.14781	0.0295719	3		0.667745	0.0634566	3			0.333	0.289673	0.0214733	5		1.18365	0.0985258	4		0.950868	0.0497058	4		0.441229	0.0522674	3			0.333	0.0891033	0.016966	4		0.330969	0.0541745	4		0.1481	0.017901	3		0.299377
0.35	2.80324	0.139171	5		1.02834	0.0670793	5		1.13402	0.0297929	3		0.698173	0.109327	3			0.35	0.314435	0.0210664	5		1.26363	0.0724478	4		0.926963	0.0372727	4		0.465595	0.042	3			0.35	0.120589	0.0149874	4		0.334154	0.0483696	4		0.156234	0.0149282	3		0.27782
0.367	2.74399	0.13134	5		0.996362	0.0720722	5		1.16389	0.0180528	3		0.667273	0.0822539	3			0.367	0.338278	0.0182419	5		1.38706	0.0905643	4		0.990935	0.0600748	4		0.431381	0.034144	3			0.367	0.111218	0.0172375	4		0.379527	0.0473938	4		0.161801	0.0119743	3		0.285993
0.383	2.7431	0.111984	5		0.897116	0.0824248	5		1.13851	0.0496592	3		0.625252	0.0738875	3			0.383	0.365002	0.0257317	5		1.3607	0.0538175	4		0.938631	0.0458465	4		0.433429	0.0521851	3			0.383	0.115902	0.0142079	4		0.365192	0.0479135	4		0.157397	0.00931738	3		0.283866
0.4	2.68553	0.107551	5		0.916612	0.0724338	5		1.14137	0.0368352	3		0.590641	0.0747592	3			0.4	0.396343	0.0312846	5		1.41914	0.0682333	4		0.947982	0.0572114	4		0.433969	0.0428587	3			0.4	0.122475	0.0149713	4		0.394453	0.0585148	4		0.157588	0.0135299	3		0.279982
0.417	2.68072	0.109223	5		0.89853	0.095501	5		1.16472	0.0445145	3		0.582794	0.0557003	3			0.417	0.441953	0.0473284	5		1.40605	0.079606	4		0.938575	0.0645292	4		0.415899	0.0282076	3			0.417	0.116419	0.00993806	4		0.419487	0.073176	4		0.171042	0.0145834	3		0.279379
0.433	2.62441	0.0892828	5		0.910627	0.0531985	5		1.13986	0.0282534	3		0.628023	0.0638503	3			0.433	0.464358	0.0360676	5		1.44541	0.107698	4		0.944098	0.0514264	4		0.440938	0.0463	3			0.433	0.124391	0.0152831	4		0.433189	0.0623992	4		0.177285	0.0151331	3		0.278788
0.45	2.58723	0.0926753	5		0.80045	0.069265	5		1.14969	0.0336826	3		0.580542	0.0622229	3			0.45	0.494873	0.0372792	5		1.42601	0.12963	4		0.937954	0.0411144	4		0.421759	0.0381479	3			0.45	0.118657	0.0217001	4		0.486206	0.0826426	4		0.156901	0.00889004	3		0.279134
0.467	2.53873	0.0839785	5		0.796801	0.0583343	5		1.13087	0.0391543	3		0.587141	0.0358905	3			0.467	0.509266	0.0423658	5		1.41082	0.12914	4		0.928714	0.041564	4		0.429382	0.0348145	3			0.467	0.132713	0.0200132	4		0.480443	0.0505434	4		0.168182	0.0154644	3		0.261238
0.483	2.52021	0.0927988	5		0.785486	0.0718854	5		1.12451	0.0278784	3		0.575899	0.0487992	3			0.483	0.548844	0.0370781	5		1.39039	0.130656	4		0.929273	0.0583514	4		0.449444	0.0387499	3			0.483	0.136999	0.0180225	4		0.48625	0.0516512	4		0.165072	0.0122916	3		0.273822
0.5	2.53168	0.115022	5		0.817955	0.0398499	5		1.10417	0.0277754	3		0.57052	0.0410701	3			0.5	0.599845	0.0393443	5		1.39341	0.143909	4		0.894536	0.0378688	4		0.432322	0.0435464	3			0.5	0.129784	0.0226905	4		0.505452	0.051451	4		0.167527	0.0122676	3		0.268991
0.517	2.43882	0.0742081	5		0.833818	0.0377477	5		1.10761	0.0428689	3		0.531486	0.0430593	3			0.517	0.640845	0.053361	5		1.33866	0.133842	4		0.912315	0.0490682	4		0.432057	0.0321165	3			0.517	0.143365	0.0196834	4		0.537891	0.0781939	4		0.170716	0.0114389	3		0.277552
0.533	2.38553	0.0848778	5		0.817534	0.0478753	5		1.1185	0.0518468	3		0.565503	0.0244413	3			0.533	0.652836	0.0565948	5		1.32024	0.116278	4		0.905413	0.048773	4		0.427389	0.0424558	3			0.533	0.156555	0.0293425	4		0.531069	0.0605442	4		0.171751	0.0135373	3		0.284264
0.55	2.31839	0.0680891	5		0.707878	0.0668523	5		1.1322	0.0434047	3		0.581567	0.0170965	3			0.55	0.751412	0.059247	5		1.24548	0.112969	4		0.909458	0.05856	4		0.400366	0.0276626	3			0.55	0.172662	0.015903	4		0.557943	0.0650458	4		0.171925	0.00663934	3		0.281164
0.567	2.3248	0.0869235	5		0.761564	0.0650059	5		1.09717	0.0470108	3		0.556728	0.0179762	3			0.567	0.76544	0.0630684	5		1.21124	0.117439	4		0.900422	0.0311376	4		0.409204	0.0124734	3			0.567	0.18118	0.0180151	4		0.558581	0.0535723	4		0.176639	0.0210233	3		0.275936
0.583	2.32599	0.0906754	5		0.682364	0.0535708	5		1.11371	0.0432111	3		0.528578	0.0109924	3			0.583	0.814964	0.0581219	5		1.21439	0.117054	4		0.923182	0.0402573	4		0.422958	0.0391525	3			0.583	0.178832	0.0176791	4		0.574083	0.0638385	4		0.166817	0.00904945	3		0.268194
0.6	2.30113	0.135801	5		0.703111	0.0630986	5		1.1282	0.0584507	3		0.560661	0.00332541	3			0.6	0.874348	0.079446	5		1.19562	0.129943	4		0.954711	0.0581814	4		0.400807	0.012468	3			0.6	0.19744	0.0178259	4		0.623026	0.0645459	4		0.170216	0.0194074	3		0.262637
0.617	2.23849	0.0910444	5		0.765493	0.0226444	5		1.09959	0.0582218	3		0.557639	0.029697	3			0.617	0.928927	0.0691463	5		1.15213	0.112544	4		0.922948	0.030115	4		0.41705	0.0258775	3			0.617	0.195672	0.0190857	4		0.608685	0.0629311	4		0.168206	0.0066461	3		0.267647
0.633	2.19234	0.118285	5		0.732653	0.0659784	5		1.12158	0.0501535	3		0.576244	0.0250288	3			0.633	0.961991	0.0706327	5		1.14648	0.109932	4		0.898731	0.043211	4		0.446137	0.0203598	3			0.633	0.198921	0.0184417	4		0.622685	0.0618122	4		0.166678	0.0194386	3		0.278099
0.65	2.15508	0.0977613	5		0.760233	0.0466592	5		1.11765	0.0419005	3		0.584292	0.0452766	3			0.65	1.02962	0.0900988	5		1.11612	0.104625	4		0.893537	0.0388636	4		0.427863	0.0177395	3			0.65	0.20293	0.0210624	4		0.62449	0.0654937	4		0.159581	0.0129081	3		0.267465
0.667	2.14294	0.101394	5		0.738974	0.0201419	5		1.09008	0.0223705	3		0.557428	0.0283253	3			0.667	1.04447	0.0833738	5		1.04936	0.106824	4		0.892864	0.0373495	4		0.432395	0.0210791	3			0.667	0.203227	0.0119183	4		0.671044	0.0836556	4		0.162005	0.0120159	3		0.289195
0.683	2.20182	0.092526	5		0.703156	0.0334414	5		1.1192	0.0432978	3		0.574462	0.0308803	3			0.683	1.09831	0.101613	5		1.04943	0.1114	4		0.920539	0.0529551	4		0.433199	0.00508754	3			0.683	0.211778	0.0171213	4		0.678651	0.0724454	4		0.159643	0.00989293	3		0.285258
0.7	2.14775	0.098239	5		0.671153	0.0543293	5		1.1164	0.0688981	3		0.577726	0.0399126	3			0.7	1.12388	0.094696	5		1.02821	0.0953043	4		0.91765	0.0329289	4		0.430209	0.0249427	3			0.7	0.231594	0.0170186	4		0.683603	0.0635603	4		0.148773	0.0106643	3		0.277573
0.717	2.08259	0.122636	5		0.636207	0.0489171	5		1.0808	0.0184522	3		0.553472	0.0311894	3			0.717	1.18945	0.0921719	5		1.04107	0.104741	4		0.951058	0.0544148	4		0.431983	0.0051939	3			0.717	0.249712	0.0107699	4		0.68784	0.0820348	4		0.16252	0.0105424	3		0.264113
0.733	2.0324	0.1272	5		0.647217	0.0672274	5		1.0841	0.0246331	3		0.547953	0.0409754	3			0.733	1.24908	0.108947	5		0.981785	0.0886162	4		0.919839	0.0415147	4		0.439614	0.00582496	3			0.733	0.251121	0.0284415	4		0.724809	0.0957957	4		0.152581	0.0039413	3		0.27836
0.75	2.09868	0.106009	5		0.660362	0.0664317	5		1.11881	0.0187485	3		0.56843	0.0588821	3			0.75	1.32335	0.11676	5		0.963408	0.103414	4		0.929976	0.053649	4		0.447061	0.019803	3			0.75	0.274025	0.0275014	4		0.75564	0.0891143	4		0.150638	0.00611048	3		0.265439
0.767	2.03552	0.0682795	5		0.645923	0.0563362	5		1.06133	0.0275389	3		0.551022	0.0480199	3			0.767	1.3835	0.109447	5		0.896731	0.0799116	4		0.977187	0.0482833	4		0.452717	0.0547053	3			0.767	0.274962	0.0267007	4		0.76137	0.0826735	4		0.152343	0.00952997	3		0.25863
0.783	2.05747	0.0573903	5		0.632548	0.0604979	5		1.06609	0.0429047	3		0.554878	0.046758	3			0.783	1.49601	0.115038	5		0.915043	0.0626095	4		0.973708	0.0533127	4		0.475877	0.0222565	3			0.783	0.278564	0.0283496	4		0.739896	0.0679991	4		0.153383	0.0127615	3		0.263836
0.8	2.02507	0.106393	5		0.570803	0.0651341	5		1.13087	0.0521447	3		0.568424	0.0240068	3			0.8	1.52756	0.132279	5		0.916688	0.068245	4		0.939197	0.0487688	4		0.465065	0.0258788	3			0.8	0.295239	0.0211381	4		0.787707	0.0790191	4		0.150452	0.0187007	3		0.277349
0.817	1.95817	0.0665741	5		0.736707	0.0874205	5		1.08499	0.0396783	3		0.594642	0.0297441	3			0.817	1.62895	0.138308	5		0.890299	0.0837545	4		1.00147	0.0601874	4		0.451837	0.0280538	3			0.817	0.301273	0.026192	4		0.802288	0.076404	4		0.159402	0.0122829	3		0.266045
0.833	2.0646	0.0724676	5		0.625987	0.0896098	5		1.07815	0.0347563	3		0.574555	0.0250519	3			0.833	1.62795	0.109802	5		0.883114	0.0662321	4		0.979291	0.0604287	4		0.471834	0.0167025	3			0.833	0.314383	0.024613	4		0.799293	0.0448545	4		0.149866	0.0149405	3		0.279613
0.85	2.03507	0.0956318	5		0.669163	0.0540484	5		1.10717	0.0375898	3		0.592288	0.0345187	3			0.85	1.76405	0.140322	5		0.855666	0.0428028	4		0.976541	0.0609379	4		0.458269	0.0204655	3			0.85	0.309458	0.0258966	4		0.837602	0.0895532	4		0.162082	0.0111536	3		0.305664
0.867	1.98918	0.104624	5		0.59784	0.0530921	5		1.11046	0.0242157	3		0.585495	0.0595228	3			0.867	1.82494	0.155398	5		0.86364	0.0680986	4		0.916653	0.0433164	4		0.477586	0.0326702	3			0.867	0.339531	0.0276244	4		0.818958	0.0706016	4		0.152959	0.0148358	3		0.280114
0.883	1.92501	0.0835309	5		0.588428	0.11385	5		1.10973	0.0403105	3		0.609692	0.0347228	3			0.883	1.90252	0.139725	5		0.890232	0.0884939	4		0.969057	0.0735887	4		0.486045	0.0111402	3			0.883	0.348934	0.0250351	4		0.859987	0.0648205	4		0.153703	0.0106557	3		0.289848
0.9	1.92388	0.0778425	5		0.581056	0.0712011	5		1.09251	0.029695	3		0.574368	0.0180435	3			0.9	1.96915	0.161313	5		0.925064	0.0896462	4		0.954667	0.0567962	4		0.464788	0.0250272	3			0.9	0.358999	0.0297736	4		0.917185	0.0818908	4		0.154483	0.00930035	3		0.276311
0.917	1.98747	0.0881263	5		0.609104	0.0606767	5		1.08994	0.0426916	3		0.587413	0.0284998	3			0.917	2.06432	0.157118	5		0.90834	0.0850685	4		0.976062	0.055166	4		0.482109	0.0370611	3			0.917	0.382479	0.032735	4		0.872252	0.0549823	4		0.153862	0.00865169	3		0.285334
0.933	1.99418	0.0974346	5		0.624892	0.0382244	5		1.12852	0.0532287	3		0.616756	0.0166116	3			0.933	2.12338	0.155984	5		0.900086	0.078377	4		0.962753	0.0682609	4		0.485394	0.0116336	3			0.933	0.385078	0.0388422	4		0.858985	0.0666034	4		0.154129	0.01299	3		0.273833
0.95	1.90968	0.0651905	5		0.642896	0.072747	5		1.07866	0.0390896	3		0.606527	0.0243522	3			0.95	2.16495	0.176554	5		0.879679	0.0852654	4		0.968873	0.0715169	4		0.47001	0.0202416	3			0.95	0.412946	0.028973	4		0.900612	0.0586471	4		0.156609	0.0154447	3		0.287714
0.967	1.88642	0.0293821	5		0.604256	0.0552155	5		1.09129	0.0340431	3		0.603503	0.0290696	3			0.967	2.20604	0.158665	5		0.833103	0.10538	4		0.960679	0.0695759	4		0.473962	0.0145813	3			0.967	0.403273	0.0266237	4		0.89865	0.0556975	4		0.146275	0.0211389	3		0.289701
0.983	1.88653	0.0461151	5		0.624293	0.0797197	5		1.08163	0.0616977	3		0.597408	0.0241002	3			0.983	2.27546	0.140763	5		0.790364	0.0885393	4		0.993891	0.072341	4		0.471087	0.00233305	3			0.983	0.410248	0.0207283	4		0.890961	0.0662414	4		0.15181	0.0148744	3		0.274302
1	1.88774	0.0579846	5		0.507483	0.0451848	5		1.07916	0.0342679	3		0.574291	0.0283216	3			1	2.30359	0.128522	5		0.835873	0.0950214	4		0.96138	0.0660101	4		0.480404	0.0208085	3			1	0.437906	0.0196001	4		0.882007	0.0474374	4		0.142201	0.0178643	3		0.279831
1.017	1.86103	0.0598416	5		0.529206	0.0588711	5		1.09334	0.0591158	3		0.587729	0.0375121	3			1.017	2.3223	0.121982	5		0.854369	0.0782655	4		1.00451	0.0834081	4		0.490056	0.00132602	3			1.017	0.454592	0.0382356	4		0.911197	0.079552	4		0.146334	0.0261249	3		0.274913
1.033	1.8408	0.0733826	5		0.489459	0.0749428	5		1.08109	0.0362089	3		0.578687	0.0273941	3			1.033	2.37109	0.124747	5		0.82488	0.0778617	4		0.956314	0.0746651	4		0.517681	0.0321308	3			1.033	0.451651	0.0333729	4		0.894919	0.0605553	4		0.137416	0.0170399	3		0.269007
1.05	1.87438	0.0657925	5		0.501557	0.0506151	5		1.08638	0.0366321	3		0.674077	0.0617423	3			1.05	2.40971	0.107973	5		0.817302	0.0777555	4		0.966007	0.061578	4		0.495186	0.0120568	3			1.05	0.471321	0.0334271	4		0.882942	0.0681952	4		0.13771	0.014991	3		0.285665
1.067	1.7791	0.0746784	5		0.544085	0.081016	5		1.076	0.0272526	3		0.664257	0.0449555	3			1.067	2.41499	0.0776039	5		0.767609	0.079136	4		0.996849	0.0830352	4		0.500419	0.0175688	3			1.067	0.516268	0.0309185	4		0.898266	0.0752464	4		0.146653	0.0185676	3		0.283626
1.083	1.79162	0.0539024	5		0.647939	0.0869021	5		1.0604	0.0346095	3		0.63288	0.0557813	3			1.083	2.41235	0.0761855	5		0.768275	0.0942658	4		0.990154	0.074842	4		0.507799	0.0299012	3			1.083	0.523495	0.0408071	4		0.878407	0.0646223	4		0.147137	0.0173706	3		0.284432
1.1	1.79767	0.044715	5		0.41753	0.0907712	5		1.04561	0.018842	3		0.634386	0.0265563	3			1.1	2.39658	0.0993742	5		0.76138	0.0942759	4		0.976749	0.0798364	4		0.487036	0.0382157	3			1.1	0.539055	0.0483016	4		0.844472	0.066671	4		0.130935	0.0167062	3		0.287022
1.117	1.79137	0.07593	5		0.561787	0.0382394	5		1.06762	0.0349616	3		0.57996	0.0411779	3			1.117	2.39638	0.0929118	5		0.805424	0.112714	4		0.960326	0.0801534	4		0.473354	0.0251074	3			1.117	0.557957	0.0513085	4		0.839547	0.0600465	4		0.13577	0.021153	3		0.297327
1.133	1.82194	0.0972143	5		0.582558	0.0367197	5		1.04483	0.0325157	3		0.590577	0.0544563	3			1.133	2.37335	0.103887	5		0.779805	0.151954	4		0.954131	0.0690904	4		0.489263	0.0162859	3			1.133	0.591646	0.0578785	4		0.827339	0.047765	4		0.129246	0.0159579	3		0.310379
1.15	1.84181	0.104302	5		0.484903	0.0397853	5		1.02993	0.0376428	3		0.62215	0.0401598	3			1.15	2.37203	0.102015	5		0.769234	0.101089	4		0.963769	0.0696164	4		0.487657	0.0124062	3			1.15	0.593631	0.043873	4		0.836277	0.0545014	4		0.134313	0.00765071	3		0.300771
1.167	1.86804	0.0876266	5		0.645757	0.0336979	5		1.03153	0.0322143	3		0.619645	0.0437302	3			1.167	2.35278	0.12445	5		0.732829	0.0842149	4		1.006	0.0740215	4		0.46773	0.0353134	3			1.167	0.630194	0.0418249	4		0.777455	0.0461699	4		0.143141	0.0111162	3		0.270083
1.183	1.79045	0.0700064	5		0.653304	0.0667588	5		1.05372	0.0413719	3		0.597996	0.0319399	3			1.183	2.30288	0.123036	5		0.739472	0.10787	4		1.03258	0.103803	4		0.472844	0.0333118	3			1.183	0.643071	0.0703015	4		0.78231	0.0441605	4		0.136504	0.0183803	3		0.261342
1.2	1.78146	0.0816174	5		0.637844	0.0920012	5		1.02989	0.0153695	3		0.611495	0.0500114	3			1.2	2.33952	0.124196	5		0.716734	0.107861	4		0.998561	0.0630128	4		0.478071	0.0340192	3			1.2	0.67113	0.0541506	4		0.796131	0.0508691	4		0.142688	0.0122579	3		0.269229
1.217	1.77211	0.0702538	5		0.742334	0.0420046	5		1.02273	0.035556	3		0.614246	0.0493386	3			1.217	2.34207	0.13353	5		0.754078	0.0891606	4		0.990377	0.0810194	4		0.495372	0.0211959	3			1.217	0.68046	0.0533741	4		0.787559	0.0585427	4		0.146792	0.0128432	3		0.267736
1.233	1.87243	0.0683571	5		0.742644	0.190075	5		1.0243	0.027396	3		0.631463	0.0530177	3			1.233	2.30445	0.127157	5		0.734355	0.0887417	4		0.988836	0.0862407	4		0.461407	0.012683	3			1.233	0.700186	0.0628166	4		0.752385	0.0350517	4		0.152094	0.0151189	3		0.291851
1.25	1.79687	0.0817073	5		0.697312	0.0935885	5		1.07649	0.0269279	3		0.588366	0.0351897	3			1.25	2.28871	0.13549	5		0.730712	0.123023	4		1.02194	0.0962741	4		0.504109	0.0127228	3			1.25	0.698888	0.0691141	4		0.745438	0.0453696	4		0.149343	0.00896496	3		0.277274
1.267	1.87255	0.0792299	5		0.501364	0.144354	5		1.05113	0.0486039	3		0.63365	0.0199467	3			1.267	2.25853	0.135178	5		0.752489	0.0866434	4		1.0037	0.0956195	4		0.513067	0.0217145	3			1.267	0.74212	0.0416635	4		0.768157	0.0459154	4		0.151718	0.0139192	3		0.292738
1.283	1.76974	0.0755447	5		0.495077	0.0843037	5		1.01226	0.0290716	3		0.634523	0.0501807	3			1.283	2.26372	0.130128	5		0.813602	0.0945351	4		1.02062	0.106496	4		0.514522	0.0260914	3			1.283	0.791232	0.0679642	4		0.728034	0.0413422	4		0.14783	0.0137914	3		0.291747
1.3	1.8236	0.0931574	5		0.567994	0.186528	5		1.0459	0.0256229	3		0.615034	0.0295983	3			1.3	2.25622	0.133127	5		0.787202	0.0825598	4		0.949555	0.0855037	4		0.544743	0.0250598	3			1.3	0.817111	0.0739103	4		0.732577	0.054794	4		0.148622	0.0100953	3		0.287336
1.317	1.9175	0.134889	5		0.587944	0.111532	5		1.02848	0.0359908	3		0.599667	0.025398	3			1.317	2.16344	0.117858	5		0.767974	0.117883	4		0.979435	0.100501	4		0.533786	0.0303216	3			1.317	0.815617	0.0697524	4		0.725042	0.0509047	4		0.148172	0.00640251	3		0.281526
1.333	1.76918	0.0472488	5		0.707561	0.153907	5		1.01406	0.0308489	3		0.617168	0.0648149	3			1.333	2.20454	0.122677	5		0.8219	0.14998	4		0.982363	0.0976518	4		0.53325	0.028594	3			1.333	0.841974	0.0709604	4		0.742692	0.0750048	4		0.147578	0.00995677	3		0.285006
1.35	1.86347	0.0634742	5		0.519652	0.0904071	5		1.03335	0.0305716	3		0.610027	0.0529567	3			1.35	2.27417	0.134931	5		0.715756	0.0977918	4		0.977093	0.114112	4		0.518979	0.0219294	3			1.35	0.879369	0.0636697	4		0.690246	0.0424817	4		0.134195	0.0125016	3		0.304587
1.367	1.76878	0.0573151	5		0.521098	0.127451	5		1.05216	0.0375476	3		0.62815	0.0544091	3			1.367	2.20183	0.12157	5		0.841311	0.145889	4		0.978299	0.073364	4		0.522218	0.0209172	3			1.367	0.914248	0.0615044	4		0.70146	0.0596773	4		0.142851	0.00413767	3		0.312981
1.383	1.88601	0.0741318	5		0.650164	0.156219	5		1.02295	0.0144567	3		0.617018	0.0155352	3			1.383	2.24904	0.12805	5		0.786858	0.127022	4		0.99618	0.101882	4		0.526188	0.031406	3			1.383	0.926316	0.075309	4		0.717421	0.0427771	4		0.153735	0.00296088	3		0.289019
1.4	1.75553	0.0421821	5		0.519527	0.151981	5		1.05025	0.0299968	3		0.603974	0.0453647	3			1.4	2.18237	0.131983	5		0.880228	0.139872	4		1.01829	0.0712127	4		0.506161	0.0166862	3			1.4	0.960641	0.0864932	4		0.680125	0.0641795	4		0.151899	0.00842732	3		0.286945
1.417	1.83335	0.114313	5		0.697029	0.138439	5		1.0373	0.0180762	3		0.608244	0.0558965	3			1.417	2.10398	0.122405	5		0.723091	0.0889092	4		1.01088	0.0946647	4		0.484995	0.0125801	3			1.417	0.96275	0.0828991	4		0.677161	0.0638103	4		0.151448	0.0176784	3		0.284703
1.433	1.7052	0.0542866	5		0.964659	0.153863	5		1.03157	0.0317282	3		0.591176	0.0311436	3			1.433	2.11402	0.109886	5		0.736134	0.140054	4		1.04608	0.123271	4		0.511128	0.00145769	3			1.433	1.02307	0.10069	4		0.656385	0.0483177	4		0.150387	0.00580699	3		0.280289
1.45	1.85734	0.119305	5		0.815633	0.206868	5		1.00085	0.0230133	3		0.569095	0.0228738	3			1.45	2.14043	0.110169	5		0.829428	0.0923348	4		1.00463	0.0927084	4		0.517466	0.0121554	3			1.45	1.05542	0.0958275	4		0.672904	0.0543502	4		0.15488	0.0170805	3		0.297956
1.467	1.63711	0.0553463	5		0.726685	0.208212	5		1.03672	0.0347816	3		0.612458	0.0465476	3			1.467	2.13334	0.133726	5		0.838797	0.15211	4		1.02085	0.103458	4		0.485905	0.0290704	3			1.467	1.09423	0.109934	4		0.653119	0.0416279	4		0.14685	0.0152812	3		0.285954
1.483	1.78547	0.120849	5		0.971122	0.17842	5		1.02228	0.0327119	3		0.670816	0.0514748	3			1.483	2.08674	0.108542	5		0.781256	0.141165	4		1.00114	0.108258	4		0.500354	0.0569231	3			1.483	1.10431	0.0900691	4		0.681043	0.0631895	4		0.145301	0.0138146	3		0.273434
1.5	1.86569	0.146124	5		0.861955	0.262663	5		0.978541	0.0250923	3		0.581484	0.0207611	3			1.5	2.11123	0.125336	5		0.703588	0.108312	4		0.978675	0.080033	4		0.532848	0.0265104	3			1.5	1.15661	0.0971868	4		0.657473	0.0367422	4		0.143159	0.00951141	3		0.27267
1.517	1.65172	0.0419512	5		0.801714	0.0854519	5		1.01035	0.0398265	3		0.606741	0.0505893	3			1.517	2.07897	0.132244	5		0.718191	0.104947	4		1.00961	0.108595	4		0.487288	0.0273136	3			1.517	1.19431	0.1236	4		0.663937	0.0668597	4		0.135902	0.016451	3		0.293976
1.533	1.79317	0.171602	5		0.860388	0.125418	5		1.01259	0.0309135	3		0.614213	0.027401	3			1.533	2.0872	0.142348	5		0.692863	0.113411	4		1.0407	0.0872846	4		0.491038	0.0349201	3			1.533	1.21796	0.0897452	4		0.683994	0.0823944	4		0.129303	0.0123455	3		0.292485
1.55	1.55465	0.162432	5		0.846271	0.0746858	5		1.00467	0.0231592	3		0.585996	0.0209901	3			1.55	2.02815	0.110897	5		0.790158	0.118701	4		1.05041	0.127142	4		0.496374	0.0547675	3			1.55	1.25353	0.0773043	4		0.65835	0.0979992	4		0.127688	0.0150416	3		0.299882
1.567	1.73246	0.0906852	5		0.744155	0.121301	5		1.0163	0.00153716	3		0.606109	0.0160517	3			1.567	2.1124	0.128103	5		0.705483	0.138777	4		1.0001	0.105958	4		0.495623	0.0545865	3			1.567	1.29589	0.0941738	4		0.673016	0.0867047	4		0.139556	0.0114156	3		0.269702
1.583	1.72506	0.130136	5		0.831443	0.0873769	5		1.03915	0.0440147	3		0.604998	0.0291474	3			1.583	2.13569	0.143366	5		0.650838	0.111273	4		0.984913	0.122061	4		0.541866	0.0307551	3			1.583	1.36724	0.104988	4		0.683254	0.0913422	4		0.135391	0.0190721	3		0.267559
1.6	1.74658	0.0817353	5		1.20422	0.152831	5		1.08267	0.0204065	3		0.628641	0.0335318	3			1.6	2.06316	0.131206	5		0.711168	0.131165	4		0.973433	0.116019	4		0.510433	0.0242116	3			1.6	1.41594	0.137356	4		0.618327	0.056756	4		0.136565	0.00719665	3		0.259636
1.617	1.86097	0.103219	5		0.904394	0.231754	5		1.05724	0.0325221	3		0.625531	0.0367066	3			1.617	2.01915	0.121508	5		0.660062	0.111834	4		0.954931	0.092092	4		0.539756	0.049067	3			1.617	1.42373	0.0914178	4		0.678227	0.0657412	4		0.150278	0.0033915	3		0.284115
1.633	1.78279	0.206891	5		0.918886	0.115558	5		1.01233	0.021608	3		0.623272	0.0554151	3			1.633	1.97019	0.117153	5		0.685533	0.175732	4		0.927317	0.0652914	4		0.535381	0.061425	3			1.633	1.46666	0.119021	4		0.674416	0.0709663	4		0.148694	0.0208985	3		0.282728
1.65	1.77451	0.130912	5		0.849582	0.225541	5		1.05538	0.0410786	3		0.616819	0.0400811	3			1.65	1.9662	0.129751	5		0.711749	0.142171	4		0.997688	0.103525	4		0.540594	0.0335383	3			1.65	1.48024	0.115697	4		0.637583	0.054302	4		0.144962	0.0112405	3		0.26831
1.667	1.62074	0.176888	5		0.746792	0.230125	5		1.03416	0.0365436	3		0.65104	0.0319388	3			1.667	1.92844	0.130329	5		0.675461	0.133998	4		0.976461	0.0789553	4		0.559042	0.0529728	3			1.667	1.50627	0.0990752	4		0.594185	0.0468688	4		0.141354	0.0137624	3		0.269313
1.683	1.63151	0.14711	5		0.790896	0.1581	5		1.05005	0.0451797	3		0.616068	0.0587632	3			1.683	1.93823	0.128279	5		0.59697	0.167695	4		0.963291	0.10626	4		0.551407	0.0284988	3			1.683	1.55764	0.149688	4		0.666896	0.109239	4		0.145724	0.0116114	3		0.275219
1.7	1.75661	0.147606	5		0.491941	0.147723	5		1.02147	0.0216953	3		0.659727	0.0612771	3			1.7	1.90838	0.118012	5		0.723231	0.0842854	4		0.98568	0.120309	4		0.525812	0.0542129	3			1.7	1.6167	0.123945	4		0.624813	0.099336	4		0.136677	0.0145433	3		0.307147
1.717	1.78214	0.118127	5		0.896938	0.243149	5		1.05508	0.0351717	3		0.632413	0.0354436	3			1.717	1.89488	0.0853023	5		0.693433	0.0996985	4		0.977681	0.101957	4		0.530292	0.0656049	3			1.717	1.66485	0.138004	4		0.643201	0.084486	4		0.137715	0.0205219	3		0.271954
1.733	1.81985	0.144369	5		0.977855	0.259985	5		1.05055	0.0271577	3		0.650227	0.0689147	3			1.733	1.96294	0.0934762	5		0.568476	0.0989967	4		0.997417	0.106622	4		0.555288	0.044047	3			1.733	1.72019	0.111974	4		0.600005	0.0698525	4		0.135682	0.0126349	3		0.303406
1.75	1.65018	0.177185	5		0.751914	0.215114	5		1.01995	0.0305797	3		0.617629	0.0464708	3			1.75	1.95928	0.124928	5		0.694038	0.115536	4		1.01726	0.133079	4		0.530288	0.0142334	3			1.75	1.67637	0.103014	4		0.575992	0.0729111	4		0.139527	0.01016	3		0.287614
1.767	1.81238	0.192061	5		0.870654	0.134693	5		1.09095	0.0438416	3		0.639475	0.0230008	3			1.767	1.92925	0.121467	5		0.622375	0.0966201	4		1.00415	0.093854	4		0.565533	0.0425579	3			1.767	1.76914	0.0936994	4		0.54684	0.0835498	4		0.139296	0.0198082	3		0.267091
1.783	1.67512	0.207275	5		0.853058	0.0970629	5		1.05479	0.052614	3		0.626105	0.052877	3			1.783	1.93694	0.131698	5		0.691653	0.189582	4		0.979821	0.0919248	4		0.549207	0.0488502	3			1.783	1.77188	0.0787681	4		0.525715	0.0579153	4		0.13223	0.012868	3		0.292291
1.8	1.75284	0.0878013	5		0.818895	0.297664	5		1.06303	0.0436977	3		0.604816	0.0391304	3			1.8	1.85564	0.123114	5		0.760488	0.143714	4		0.941778	0.0767378	4		0.500879	0.035661	3			1.8	1.76782	0.105581	4		0.584681	0.0818346	4		0.143301	0.014702	3		0.29507
1.817	1.79141	0.0936535	5		0.867973	0.144854	5		1.0623	0.0499988	3		0.62674	0.0251304	3			1.817	1.89803	0.134294	5		0.815221	0.229858	4		0.957004	0.0941387	4		0.545691	0.0194685	3			1.817	1.82857	0.0894859	4		0.598115	0.111121	4		0.140675	0.0142137	3		0.306386
1.833	1.78141	0.0942262	5		0.841205	0.142294	5		1.03565	0.0412771	3		0.617506	0.0298783	3			1.833	1.80983	0.106188	5		0.706834	0.141843	4		0.956248	0.0860437	4		0.525198	0.0516069	3			1.833	1.84844	0.0497347	4		0.576871	0.0584634	4		0.14364	0.00359064	3		0.272054
1.85	1.76593	0.151955	5		0.862356	0.215854	5		1.07032	0.0533988	3		0.603852	0.0173603	3			1.85	1.83198	0.0985138	5		0.791734	0.23744	4		0.984623	0.093754	4		0.510491	0.022505	3			1.85	1.85346	0.0688018	4		0.56506	0.0658315	4		0.146511	0.0154608	3		0.295357
1.867	1.90184	0.180244	5		0.936222	0.215266	5		1.02058	0.0459908	3		0.649412	0.0500406	3			1.867	1.90991	0.117547	5		0.693723	0.111121	4		1.00787	0.105393	4		0.530462	0.0319493	3			1.867	1.87376	0.0762028	4		0.597477	0.108651	4		0.143421	0.0133594	3		0.25833
1.883	1.77427	0.0745298	5		0.802491	0.148525	5		1.04851	0.0807054	3		0.653656	0.0660782	3			1.883	1.84401	0.124642	5		0.695095	0.20685	4		1.03249	0.155115	4		0.54775	0.040669	3			1.883	1.85967	0.116992	4		0.56735	0.0737896	4		0.131821	0.0163325	3		0.286488
1.9	1.9105	0.166164	5		0.912491	0.336133	5		1.04415	0.0542169	3		0.689495	0.0885905	3			1.9	1.7336	0.110194	5		0.799286	0.184257	4		0.992048	0.111728	4		0.564401	0.0438931	3			1.9	1.83308	0.124617	4		0.543854	0.0578634	4		0.13155	0.0142036	3		0.282341
1.917	1.86489	0.104099	5		0.832277	0.35343	5		1.00189	0.0189009	3		0.67666	0.0673548	3			1.917	1.77347	0.114298	5		0.783169	0.202709	4		1.03349	0.124467	4		0.562798	0.0402081	3			1.917	1.88411	0.0874089	4		0.559996	0.0627754	4		0.14088	0.0129873	3		0.278687
1.933	1.9504	0.116262	5		0.525759	0.22259	5		1.02219	0.0213804	3		0.62473	0.0592358	3			1.933	1.84128	0.121108	5		0.740942	0.147831	4		1.02349	0.158658	4		0.557376	0.044365	3			1.933	1.79092	0.0771079	4		0.566922	0.0795422	4		0.149114	0.01338	3		0.273215
1.95	1.884	0.0720333	5		0.80856	0.193196	5		1.05276	0.026835	3		0.660658	0.0548523	3			1.95	1.90468	0.137918	5		0.83854	0.15761	4		0.986678	0.0998187	4		0.539825	0.0463069	3			1.95	1.91273	0.0593738	4		0.48975	0.0412213	4		0.154035	0.0166727	3		0.25542
1.967	1.9582	0.187311	5		0.877653	0.210958	5		1.0246	0.02552	3		0.606293	0.0501192	3			1.967	1.89258	0.103701	5		0.879989	0.204882	4		1.01525	0.139814	4		0.563318	0.0213558	3			1.967	1.94466	0.080062	4		0.556173	0.0878387	4		0.151182	0.0186352	3		0.269625
1.983	1.94406	0.13469	5		0.972717	0.197597	5		1.04105	0.0284238	3		0.655671	0.0549441	3			1.983	1.89153	0.171558	5		0.781813	0.210031	4		1.01537	0.126497	4		0.546072	0.0636147	3			1.983	1.99495	0.0726057	4		0.551944	0.0932348	4		0.148658	0.0121199	3		0.275798
2	2.03858	0.153249	5		0.799456	0.125858	5		1.05134	0.0666065	3		0.647376	0.0468153	3			2	1.76796	0.125877	5		0.741438	0.150564	4		0.993253	0.144967	4		0.544431	0.0355092	3			2	1.90528	0.0664272	4		0.497855	0.064299	4		0.145467	0.0133509	3		0.268483
2.017	2.03367	0.126144	5		0.882788	0.193229	5		1.0709	0.0517149	3		0.580858	0.0276216	3			2.017	1.78547	0.114432	5		0.858959	0.270829	4		0.97124	0.114972	4		0.55981	0.00499271	3			2.017	1.9168	0.0962027	4		0.564092	0.0968074	4		0.148295	0.020259	3		0.278763
2.033	1.94987	0.187626	5		0.984643	0.171043	5		1.07309	0.0584645	3		0.616226	0.0177122	3			2.033	1.847	0.113144	5		0.889343	0.295052	4		1.01259	0.121568	4		0.567634	0.0342978	3			2.033	1.90773	0.0998944	4		0.507021	0.0616348	4		0.144633	0.0217642	3		0.285499
2.05	2.02059	0.112612	5		0.920018	0.140662	5		1.07315	0.0380457	3		0.606129	0.0272584	3			2.05	1.82641	0.14954	5		0.853299	0.228385	4		1.01075	0.110971	4		0.535028	0.0274244	3			2.05	1.92428	0.11357	4		0.626922	0.155603	4		0.14772	0.0188871	3		0.287343
2.067	2.22726	0.150135	5		1.0108	0.281026	5		1.05461	0.0325492	3		0.591948	0.0414453	3			2.067	1.77835	0.146332	5		0.718144	0.247446	4		0.992626	0.0971995	4		0.559588	0.0433068	3			2.067	1.89688	0.0640181	4		0.516791	0.0627212	4		0.149479	0.0234355	3		0.291104
2.083	1.8937	0.195398	5		1.40357	0.146369	5		1.05931	0.0578639	3		0.640761	0.0477135	3			2.083	1.77765	0.137357	5		0.814063	0.193319	4		1.02961	0.114644	4		0.579162	0.0412593	3			2.083	1.9011	0.0524992	4		0.587704	0.0827028	4		0.150508	0.0168362	3		0.285599
2.1	2.14942	0.105521	5		1.28317	0.209298	5		1.08049	0.0481805	3		0.6894	0.0798681	3			2.1	1.80081	0.120336	5		0.816181	0.205881	4		1.02331	0.1287	4		0.559971	0.032078	3			2.1	1.84867	0.0727795	4		0.583049	0.144356	4		0.151256	0.0235055	3		0.302253
2.117	2.27237	0.254291	5		1.42007	0.333392	5		1.07532	0.0376716	3		0.64819	0.0483087	3			2.117	1.86558	0.136218	5		0.779375	0.234134	4		0.978248	0.0871987	4		0.563953	0.0447685	3			2.117	1.90945	0.0816166	4		0.610636	0.140894	4		0.144358	0.0189133	3		0.277701
2.133	2.60532	0.236364	5		0.82097	0.314752	5		1.06557	0.0396196	3		0.686927	0.0611586	3			2.133	1.71499	0.0852909	5		0.766941	0.229695	4		0.985125	0.112343	4		0.594016	0.0139104	3			2.133	1.80923	0.0896077	4		0.56066	0.0800707	4		0.15044	0.02308	3		0.285545
2.15	2.06712	0.11551	5		0.935027	0.333065	5		1.11024	0.0525935	3		0.622718	0.0339227	3			2.15	1.74996	0.0988558	5		0.831131	0.114487	4		1.04388	0.12579	4		0.574522	0.0173112	3			2.15	1.78116	0.133017	4		0.616663	0.174888	4		0.139256	0.0238392	3		0.296091
2.167	2.13626	0.261751	5		1.23574	0.267109	5		1.07752	0.0595236	3		0.660318	0.0735272	3			2.167	1.74221	0.128056	5		0.899384	0.28028	4		0.996654	0.0943811	4		0.594958	0.0253568	3			2.167	1.78871	0.100869	4		0.592235	0.142752	4		0.137626	0.0152317	3		0.277954
2.183	2.25593	0.121784	5		1.34875	0.268157	5		1.04765	0.051707	3		0.69229	0.0677332	3			2.183	1.73468	0.143377	5		0.790377	0.256194	4		1.00434	0.126074	4		0.560974	0.0252814	3			2.183	1.77684	0.0890369	4		0.631297	0.166852	4		0.132353	0.0197129	3		0.295194
2.2	2.22548	0.282359	5		1.58143	0.379331	5		1.09462	0.0439857	3		0.629965	0.0242957	3			2.2	1.76684	0.117418	5		0.705523	0.232849	4		1.00016	0.123435	4		0.533416	0.0290403	3			2.2	1.73379	0.0460285	4		0.619263	0.198611	4		0.140995	0.0166377	3		0.290968
2.217	2.46123	0.156205	5		0.957212	0.277071	5		1.04303	0.0470739	3		0.662347	0.0843751	3			2.217	1.81293	0.136465	5		0.715476	0.226836	4		1.02358	0.127262	4		0.565949	0.0198644	3			2.217	1.73186	0.119263	4		0.613841	0.223209	4		0.140408	0.014971	3		0.278611
2.233	2.49301	0.237152	5		1.273	0.407338	5		1.0185	0.0434055	3		0.653573	0.0212523	3			2.233	1.79873	0.102209	5		0.735442	0.191946	4		0.987554	0.120873	4		0.577932	0.0196115	3			2.233	1.72505	0.0891475	4		0.618154	0.135649	4		0.146805	0.015745	3		0.267678
2.25	2.53349	0.155864	5		1.15965	0.330926	5		1.07298	0.0429009	3		0.669552	0.0504223	3			2.25	1.87775	0.116973	5		0.965534	0.2888	4		0.938738	0.0995703	4		0.535763	0.0119759	3			2.25	1.74294	0.0998682	4		0.571804	0.169598	4		0.163496	0.0189907	3		0.252955
2.267	2.52608	0.243672	5		1.43481	0.41209	5		1.02809	0.0505853	3		0.701712	0.0568701	3			2.267	1.84185	0.160167	5		0.826266	0.279299	4		0.988725	0.130737	4		0.533279	0.0161483	3			2.267	1.66954	0.0974024	4		0.563201	0.184373	4		0.144168	0.0224551	3		0.291574
2.283	2.25166	0.115594	5		1.21564	0.30468	5		1.00448	0.0427041	3		0.708698	0.0607232	3			2.283	1.72	0.115911	5		0.758097	0.130046	4		0.969301	0.125235	4		0.540403	0.0430405	3			2.283	1.7151	0.0812602	4		0.478121	0.151606	4		0.136424	0.0180722	3		0.290945
2.3	2.59466	0.225281	5		1.20859	0.532583	5		1.0482	0.0462479	3		0.663986	0.0683665	3			2.3	1.76527	0.136211	5		0.682122	0.201146	4		0.97206	0.118046	4		0.541226	0.0293868	3			2.3	1.70853	0.0870214	4		0.591169	0.169299	4		0.135719	0.0183995	3		0.285554
2.317	2.33938	0.148605	5		1.38629	0.397414	5		1.05574	0.0297582	3		0.673712	0.0992095	3			2.317	1.78613	0.184313	5		0.770961	0.168112	4		1.03088	0.130355	4		0.579394	0.0584793	3			2.317	1.7073	0.0453248	4		0.554673	0.159566	4		0.147957	0.0213786	3		0.276187
2.333	2.33556	0.0493954	5		0.936443	0.478796	5		1.02885	0.0338107	3		0.703472	0.0956546	3			2.333	1.75503	0.139677	5		0.678788	0.245113	4		1.01461	0.120915	4		0.546412	0.0198541	3			2.333	1.67411	0.0683848	4		0.556149	0.122043	4		0.156103	0.0128169	3		0.274412
2.35	2.30037	0.317514	5		1.16953	0.408251	5		1.02591	0.0240367	3		0.653729	0.0568314	3			2.35	1.84401	0.131812	5		0.698035	0.290091	4		0.970441	0.134629	4		0.53717	0.0303598	3			2.35	1.53586	0.102436	4		0.460527	0.069912	4		0.156991	0.0200901	3		0.275905
2.367	2.58878	0.3915	5		0.848852	0.512467	5		1.04591	0.0422768	3		0.668802	0.0781359	3			2.367	1.80522	0.198986	5		0.750229	0.205136	4		1.01823	0.136188	4		0.558074	0.0174874	3			2.367	1.53996	0.115695	4		0.68786	0.174189	4		0.151577	0.026206	3		0.277489
2.383	2.62794	0.318832	5		1.44901	0.287809	5		1.02397	0.047592	3		0.660918	0.0843141	3			2.383	1.72186	0.220763	5		0.821755	0.233088	4		0.998674	0.118071	4		0.577162	0.00960817	3			2.383	1.48337	0.0822176	4		0.539886	0.131964	4		0.155536	0.013524	3		0.276501
2.4	2.34264	0.192694	5		0.97393	0.483553	5		1.04822	0.06286	3		0.656656	0.0508181	3			2.4	1.70663	0.213616	5		0.747397	0.184971	4		0.978044	0.117385	4		0.58044	0.0281636	3			2.4	1.552	0.103906	4		0.58339	0.21932	4		0.144046	0.016522	3		0.284537
2.417	2.27575	0.210926	5		0.814213	0.254678	5		1.00548	0.0326318	3		0.662296	0.105038	3			2.417	1.68602	0.100489	5		0.803237	0.17646	4		1.03501	0.121804	4		0.578502	0.0336408	3			2.417	1.50146	0.115222	4		0.50557	0.102517	4		0.151149	0.018919	3		0.293714
2.433	2.69525	0.263655	5		0.704347	0.245096	5		1.06821	0.0665971	3		0.679623	0.0777985	3			2.433	1.80747	0.130463	5		0.764872	0.383942	4		1.01115	0.106437	4		0.571883	0.0123595	3			2.433	1.59883	0.0941532	4		0.715648	0.273464	4		0.142231	0.0219084	3		0.265931
2.45	2.62247	0.247939	5		1.09273	0.352676	5		1.01385	0.0324153	3		0.668212	0.0675865	3			2.45	1.85958	0.117307	5		0.803017	0.31688	4		1.00271	0.149078	4		0.559779	0.015839	3			2.45	1.51828	0.063539	4		0.606563	0.191195	4		0.153535	0.0090681	3		0.275122
2.467	2.4409	0.319491	5		0.819721	0.457082	5		1.04047	0.0413774	3		0.619875	0.0486227	3			2.467	1.88459	0.142455	5		0.981948	0.435564	4		0.991283	0.114205	4		0.548807	0.0142367	3			2.467	1.47373	0.0935143	4		0.568915	0.13568	4		0.143535	0.0207904	3		0.275395
2.483	2.76145	0.252631	5		1.04859	0.4549	5		1.04115	0.0354287	3		0.66201	0.105965	3			2.483	1.92807	0.151642	5		1.0355	0.347818	4		0.993532	0.115186	4		0.540367	0.00773633	3			2.483	1.52681	0.0685556	4		0.547141	0.105715	4		0.143937	0.0234065	3		0.278937
2.5	2.28183	0.396703	5		0.761496	0.365599	5		1.06481	0.0435315	3		0.700256	0.0791577	3			2.5	1.93586	0.131359	5		0.879856	0.179408	4		0.981863	0.132354	4		0.545054	0.0035241	3			2.5	1.48132	0.0594261	4		0.681346	0.224411	4		0.151239	0.0150503	3		0.2799
2.517	2.39486	0.314544	5		0.380966	0.316985	5		1.04837	0.0116233	3		0.632163	0.0614181	3			2.517	1.99449	0.123796	5		1.06076	0.240284	4		1.00517	0.129525	4		0.53625	0.00838038	3			2.517	1.45306	0.0882983	4		0.541519	0.196435	4		0.149762	0.0176822	3		0.271095
2.533	2.32071	0.219547	5		0.537278	0.485266	5		1.01373	0.0412107	3		0.687428	0.0656957	3			2.533	1.96224	0.122114	5		0.862108	0.283658	4		0.997593	0.122992	4		0.566189	0.0259694	3			2.533	1.48368	0.0876085	4		0.493417	0.0921649	4		0.143365	0.0191059	3		0.244108
2.55	2.53134	0.341407	5		1.02646	0.34588	5		1.04652	0.0369339	3		0.707189	0.0898087	3			2.55	1.85334	0.200543	5		0.856579	0.197972	4		1.02465	0.133485	4		0.537866	0.0117054	3			2.55	1.4247	0.0810703	4		0.64114	0.243821	4		0.144202	0.018392	3		0.249553
2.567	2.3814	0.0767028	5		0.577287	0.545667	5		1.03671	0.0317725	3		0.664013	0.0210887	3			2.567	1.73089	0.11203	5		0.995932	0.355893	4		1.00819	0.149937	4		0.548421	0.0422154	3			2.567	1.45262	0.0919199	4		0.695171	0.249227	4		0.154464	0.0142807	3		0.276514
2.583	2.68298	0.280906	5		0.814036	0.80599	5		1.02969	0.0224633	3		0.70485	0.105091	3			2.583	1.79053	0.110102	5		0.995771	0.314307	4		1.02328	0.14406	4		0.583211	0.0185527	3			2.583	1.39346	0.11365	4		0.510921	0.121922	4		0.154703	0.0160097	3		0.274106
2.6	2.39901	0.190146	5		1.03411	0.739798	5		1.01492	0.0272338	3		0.707028	0.0744986	3			2.6	1.86668	0.180368	5		1.09044	0.314474	4		1.00162	0.127428	4		0.54579	0.014607	3			2.6	1.42181	0.101127	4		0.532936	0.21139	4		0.161882	0.0187765	3		0.265542
2.617	2.6837	0.532056	5		0.649044	0.527806	5		1.04633	0.0283512	3		0.696193	0.0765025	3			2.617	1.89275	0.231087	5		0.880358	0.44117	4		0.998913	0.127827	4		0.536048	0.025472	3			2.617	1.33606	0.117077	4		0.572207	0.223081	4		0.142677	0.0241255	3		0.275637
2.633	2.93129	0.41931	5		0.527945	0.36881	5		1.07473	0.0241102	3		0.713211	0.0684281	3			2.633	1.65523	0.155823	5		0.788391	0.226273	4		1.00169	0.110094	4		0.555036	0.0266701	3			2.633	1.4304	0.0720719	4		0.591916	0.0474616	4		0.132839	0.0202821	3		0.294236
2.65	3.02953	0.442672	5		1.21761	0.580484	5		1.03805	0.0331055	3		0.65307	0.0608846	3			2.65	1.54565	0.160907	5		0.860806	0.329715	4		1.00339	0.13825	4		0.542413	0.0194926	3			2.65	1.36659	0.0663694	4		0.674498	0.117939	4		0.143523	0.0154248	3		0.288723
2.667	2.97767	0.480612	5		0.932591	0.510448	5		1.03201	0.0149854	3		0.668287	0.0680452	3			2.667	1.66848	0.159344	5		0.695578	0.272234	4		0.988162	0.119832	4		0.514846	0.00949939	3			2.667	1.36398	0.0799946	4		0.564396	0.142022	4		0.136144	0.0172063	3		0.286594
2.683	2.97673	0.385941	5		0.74762	0.389585	5		1.05583	0.0368909	3		0.645226	0.0473725	3			2.683	1.7695	0.208274	5		0.606068	0.273127	4		0.970951	0.125036	4		0.550194	0.0296231	3			2.683	1.33955	0.0465191	4		0.566274	0.164391	4		0.146658	0.011751	3		0.27287
2.7	3.24437	0.300318	5		1.12789	0.352719	5		1.01658	0.0174379	3		0.707505	0.0786432	3			2.7	1.75256	0.155359	5		0.861515	0.320738	4		1.00813	0.139677	4		0.547809	0.0282951	3			2.7	1.38107	0.0151021	4		0.645467	0.130193	4		0.141168	0.0182838	3		0.286626
2.717	3.26002	0.344953	5		1.03104	0.561311	5		1.02184	0.015812	3		0.717339	0.0738695	3			2.717	1.62819	0.138461	5		0.697161	0.21306	4		1.06788	0.145739	4		0.52652	0.0402587	3			2.717	1.40973	0.0393984	4		0.555764	0.0601765	4		0.142506	0.0126445	3		0.278732
2.733	2.79473	0.0476686	5		0.882857	0.474089	5		0.997528	0.0268082	3		0.719436	0.0852884	3			2.733	1.65739	0.206377	5		0.823017	0.435902	4		1.05393	0.142546	4		0.560713	0.0379037	3			2.733	1.35382	0.0394786	4		0.528826	0.173761	4		0.152125	0.0194352	3		0.26154
2.75	3.13737	0.0996225	5		0.540646	0.547485	5		1.00621	0.0227379	3		0.68071	0.0589145	3			2.75	1.69091	0.266139	5		0.841875	0.37407	4		1.03321	0.15853	4		0.553039	0.0130177	3			2.75	1.29186	0.0863218	4		0.679598	0.208904	4		0.14716	0.009132	3		0.288671
2.767	2.9801	0.306863	5		0.906176	0.503836	5		1.0476	0.0751274	3		0.681863	0.0668351	3			2.767	1.64963	0.242546	5		0.693921	0.341275	4		1.03701	0.133005	4		0.591514	0.0385763	3			2.767	1.28564	0.068951	4		0.586139	0.12574	4		0.147839	0.0138474	3		0.260636
2.783	3.11057	0.401239	5		0.991908	0.239812	5		1.04337	0.0475211	3		0.614437	0.0272421	3			2.783	1.54619	0.174049	5		0.851347	0.485824	4		1.03068	0.138366	4		0.552095	0.022067	3			2.783	1.36921	0.024442	4		0.524302	0.174072	4		0.150068	0.0135018	3		0.273117
2.8	3.30009	0.333512	5		1.31553	0.606423	5		1.02167	0.0754948	3		0.651271	0.0253377	3			2.8	1.70921	0.284611	5		0.853796	0.282588	4		1.05663	0.1557	4		0.581541	0.0464616	3			2.8	1.2657	0.0776344	4		0.411806	0.147495	4		0.151892	0.0161589	3		0.272847
2.817	3.15106	0.272031	5		0.79365	0.520406	5		1.03855	0.0257625	3		0.648237	0.0297483	3			2.817	1.83177	0.297972	5		0.919293	0.398772	4		1.03698	0.149671	4		0.555548	0.0353295	3			2.817	1.30993	0.0666941	4		0.649858	0.191996	4		0.147094	0.011445	3		0.28028
2.833	2.87396	0.235719	5		0.986127	0.55705	5		1.03728	0.0260892	3		0.682987	0.0226441	3			2.833	1.72901	0.218382	5		0.643364	0.350546	4		1.06381	0.144908	4		0.598252	0.0672585	3			2.833	1.18046	0.0563449	4		0.721844	0.252178	4		0.134666	0.0166462	3		0.267272
2.85	3.2613	0.43691	5		1.32893	0.3282	5		1.04184	0.0247288	3		0.7153	0.057369	3			2.85	1.58183	0.164022	5		0.998837	0.435121	4		1.06362	0.13243	4		0.601372	0.0363874	3			2.85	1.20862	0.0808146	4		0.524422	0.196774	4		0.133624	0.0168408	3		0.259965
2.867	3.39379	0.434475	5		1.43142	0.442398	5		1.04786	0.0219437	3		0.675928	0.0471534	3			2.867	1.66643	0.325961	5		0.702402	0.208955	4		1.06598	0.163471	4		0.536996	0.0385751	3			2.867	1.24698	0.11542	4		0.596309	0.124961	4		0.139728	0.0153682	3		0.277263
2.883	3.5503	0.402852	5		1.35621	0.510539	5		1.00327	0.00830776	3		0.682365	0.0527486	3			2.883	1.51576	0.326994	5		0.915038	0.511807	4		1.06078	0.13313	4		0.547931	0.0331489	3			2.883	1.30536	0.0491001	4		0.691699	0.154646	4		0.145989	0.01995	3		0.276027
2.9	3.20263	0.237213	5		1.68763	0.589435	5		1.08133	0.0250174	3		0.675184	0.0676023	3			2.9	1.35687	0.21586	5		0.830283	0.324232	4		1.07978	0.13477	4		0.575793	0.0550865	3			2.9	1.24148	0.0748972	4		0.427562	0.162591	4		0.142653	0.0212766	3		0.25782
2.917	3.31978	0.178035	5		1.99923	0.350179	5		1.0646	0.0465014	3		0.665773	0.0950986	3			2.917	1.29838	0.197344	5		0.856948	0.289807	4		1.04223	0.118722	4		0.530186	0.0327585	3			2.917	1.2632	0.0868909	4		0.581228	0.201104	4		0.142203	0.0171542	3		0.269852
2.933	3.7348	0.861595	5		1.13275	0.794789	5		1.0268	0.0210594	3		0.73621	0.093859	3			2.933	1.49732	0.188685	5		0.990548	0.130609	4		1.0181	0.115043	4		0.5526	0.0309426	3			2.933	1.23154	0.114058	4		0.719554	0.102793	4		0.141608	0.0204604	3		0.270113
2.95	4.15904	0.787714	5		1.26754	0.451849	5		1.04301	0.0237371	3		0.676488	0.0894953	3			2.95	1.49317	0.140084	5		1.11288	0.351134	4		1.06301	0.127856	4		0.55628	0.0406304	3			2.95	1.24732	0.113853	4		0.606782	0.164815	4		0.150533	0.0152094	3		0.264054
2.967	4.09822	0.841628	5		1.68894	0.570334	5		1.09779	0.0368627	3		0.722281	0.0682348	3			2.967	1.33914	0.106756	5		1.13068	0.466397	4		1.0686	0.140876	4		0.576427	0.0645375	3			2.967	1.2228	0.107098	4		0.493743	0.232532	4		0.154467	0.0243157	3		0.265217
2.983	3.86508	0.40856	5		2.19403	0.676574	5		1.06397	0.0434634	3		0.730317	0.0782786	3			2.983	1.62368	0.371122	5		1.26816	0.440101	4		1.09038	0.136183	4		0.584771	0.0499884	3			2.983	1.17766	0.0998549	4		0.600196	0.161058	4		0.138502	0.0277114	3		0.253329
3	3.5198	0.170194	5		2.34899	0.757669	5		1.01351	0.0236948	3		0.700911	0.0748253	3			3	1.57646	0.286267	5		1.10561	0.469548	4		1.07851	0.13823	4		0.568658	0.0233676	3			3	1.15827	0.0934834	4		0.709984	0.163891	4		0.142947	0.0200622	3		0.25856
3.017	3.15289	0.308639	5		2.11343	0.814546	5		1.07252	0.0269696	3		0.676673	0.0640528	3			3.017	1.3911	0.24873	5		1.0323	0.213253	4		1.0516	0.132022	4		0.559781	0.070605	3			3.017	1.15096	0.0632421	4		0.486452	0.123227	4		0.145881	0.0222729	3		0.263845
3.033	3.75632	0.636204	5		1.82156	0.828586	5		1.03936	0.025356	3		0.70033	0.0724575	3			3.033	1.47058	0.231579	5		1.43513	0.283045	4		1.05429	0.132726	4		0.550075	0.0461743	3			3.033	1.22356	0.0991462	4		0.64192	0.0745467	4		0.147533	0.0168616	3		0.274827
3.05	3.18918	0.327236	5		2.43562	0.478223	5		1.01575	0.0187354	3		0.704078	0.115863	3			3.05	1.42188	0.185378	5		1.06956	0.292999	4		1.07793	0.120788	4		0.544505	0.0303286	3			3.05	1.10576	0.0396741	4		0.605764	0.202366	4		0.135236	0.0232347	3		0.255807
3.067	3.79396	0.414631	5		2.36898	0.651064	5		1.02565	0.0345712	3		0.712324	0.0567911	3			3.067	1.28837	0.141034	5		1.01508	0.426075	4		1.10416	0.150842	4		0.511036	0.0395711	3			3.067	1.12316	0.0854294	4		0.506245	0.0650612	4		0.140522	0.0193338	3		0.279199
3.083	4.41205	0.792882	5		2.60159	0.985006	5		1.01067	0.0171352	3		0.664896	0.0644062	3			3.083	1.45967	0.132907	5		1.19986	0.313735	4		1.03238	0.127521	4		0.534869	0.0428121	3			3.083	1.09668	0.0661559	4		0.598828	0.241385	4		0.145536	0.0211981	3		0.282004
3.1	3.63276	0.372537	5		1.72095	0.598045	5		0.999446	0.0394838	3		0.674419	0.0830933	3			3.1	1.44292	0.0652862	5		1.2487	0.398686	4		1.06465	0.14175	4		0.525691	0.0378717	3			3.1	1.1144	0.0404071	4		0.619931	0.0865134	4		0.14289	0.0191538	3		0.265356
3.117	3.80324	0.407548	5		1.12314	0.366489	5		0.986368	0.0113504	3		0.71728	0.0530288	3			3.117	1.47422	0.0997613	5		1.247	0.244573	4		1.06526	0.157876	4		0.562883	0.0796284	3			3.117	1.08595	0.0802226	4		0.485445	0.18043	4		0.1414	0.0206202	3		0.275091
3.133	3.65759	0.521797	5		1.99175	0.308502	5		1.03405	0.0129511	3		0.677276	0.0579009	3			3.133	1.47754	0.0973902	5		1.35576	0.425723	4		1.03124	0.132857	4		0.522743	0.0504712	3			3.133	1.10459	0.0561823	4		0.51545	0.199128	4		0.137964	0.0136702	3		0.262791
3.15	4.0065	0.659892	5		1.86486	0.398473	5		0.988989	0.019748	3		0.714996	0.0841523	3			3.15	1.70075	0.154067	5		1.09024	0.327389	4		1.07438	0.152066	4		0.55163	0.0359698	3			3.15	1.10845	0.0783374	4		0.556883	0.124392	4		0.135993	0.0281706	3		0.265427
3.167	4.25986	0.480139	5		1.28777	0.588368	5		0.98498	0.0277268	3		0.695713	0.0990174	3			3.167	1.53216	0.21569	5		0.865002	0.125634	4		1.06182	0.138178	4		0.557718	0.0770818	3			3.167	1.07522	0.0871612	4		0.547105	0.165402	4		0.144882	0.0151532	3		0.2695
3.183	4.07678	0.568457	5		1.59765	0.414521	5		1.04697	0.0246283	3		0.700427	0.0959389	3			3.183	1.68146	0.275261	5		1.36091	0.269413	4		1.11692	0.152154	4		0.550806	0.0602339	3			3.183	1.20355	0.0247274	4		0.45735	0.143528	4		0.151155	0.0177019	3		0.274993
3.2	3.88722	0.343709	5		1.69412	0.638463	5		0.973031	0.00697243	3		0.678103	0.0896216	3			3.2	1.36336	0.101836	5		1.10761	0.238261	4		1.02241	0.135837	4		0.573284	0.0516444	3			3.2	1.05699	0.0732025	4		0.437441	0.17644	4		0.149726	0.0229217	3		0.263779
3.217	3.71992	0.588242	5		1.89306	0.372031	5		1.01792	0.0308062	3		0.755506	0.104345	3			3.217	1.43665	0.145861	5		1.16236	0.23358	4		1.0546	0.137443	4		0.582383	0.0485798	3			3.217	1.19134	0.0737396	4		0.504963	0.235081	4		0.155191	0.0227353	3		0.263958
3.233	4.17049	0.426667	5		1.37803	0.718528	5		1.03587	0.0624642	3		0.747801	0.116377	3			3.233	1.34761	0.188137	5		1.03303	0.335666	4		1.05287	0.139431	4		0.54698	0.0212847	3			3.233	1.18992	0.027324	4		0.441904	0.251843	4		0.149296	0.0239789	3		0.251483
3.25	3.61551	0.65673	5		1.4162	0.464256	5		1.02493	0.0472185	3		0.708032	0.0866288	3			3.25	1.34135	0.195086	5		0.976816	0.329896	4		1.08727	0.181123	4		0.57978	0.036598	3			3.25	1.19247	0.0418297	4		0.528966	0.271989	4		0.15273	0.0264311	3		0.272721
3.267	5.02922	0.660881	5		2.02572	0.416773	5		1.05553	0.0485334	3		0.718823	0.121139	3			3.267	1.57048	0.221617	5		1.19133	0.32255	4		1.04446	0.151089	4		0.563759	0.00149536	3			3.267	1.20776	0.0777937	4		0.450723	0.264655	4		0.140646	0.0225628	3		0.252624
3.283	4.04746	0.483725	5		1.55864	0.708099	5		1.07726	0.0439541	3		0.670544	0.0874903	3			3.283	1.38551	0.273511	5		1.22858	0.359934	4		1.09361	0.14899	4		0.593099	0.0435275	3			3.283	1.21347	0.0662358	4		0.433725	0.278213	4		0.153531	0.0196132	3		0.270456
3.3	3.39682	0.16719	5		1.5563	0.827461	5		1.10646	0.0543676	3		0.706577	0.108042	3			3.3	1.53035	0.145902	5		1.01089	0.466024	4		1.02189	0.144903	4		0.555291	0.047798	3			3.3	1.14086	0.0481743	4		0.378187	0.230943	4		0.137777	0.0186875	3		0.272665
3.317	3.38618	0.232639	5		2.00832	0.771037	5		1.04031	0.0359622	3		0.716454	0.0888571	3			3.317	1.69596	0.303871	5		1.19684	0.453379	4		1.07604	0.169539	4		0.547531	0.0379338	3			3.317	1.19162	0.0792408	4		0.610251	0.335714	4		0.140303	0.0186901	3		0.286609
3.333	3.62148	0.8895	5		2.20762	0.720765	5		1.10855	0.0659752	3		0.764058	0.128859	3			3.333	1.30742	0.287366	5		1.11299	0.287781	4		1.06253	0.131492	4		0.583094	0.0324852	3			3.333	1.17042	0.0596325	4		0.437085	0.182553	4		0.153624	0.015127	3		0.258201
3.35	3.96001	0.42445	5		2.9134	1.14925	5		1.08002	0.0110975	3		0.691776	0.049739	3			3.35	1.26671	0.225737	5		1.05503	0.413891	4		1.01208	0.13464	4		0.56968	0.0507955	3			3.35	1.14194	0.0812351	4		0.327678	0.123311	4		0.149878	0.0271506	3		0.274948
3.367	3.63163	0.77415	5		1.93512	1.07787	5		1.07093	0.0498749	3		0.698098	0.0636209	3			3.367	1.51027	0.238143	5		1.2424	0.360376	4		1.06854	0.165336	4		0.552141	0.0531772	3			3.367	1.1861	0.0622995	4		0.575801	0.356568	4		0.154214	0.0195227	3		0.270831
3.383	4.3196	0.517148	5		1.72111	0.99476	5		1.06034	0.0469096	3		0.680078	0.101217	3			3.383	1.54083	0.260437	5		1.11983	0.501481	4		1.02109	0.158325	4		0.614729	0.0260075	3			3.383	1.16187	0.11616	4		0.576349	0.241606	4		0.156213	0.0284418	3		0.272913
3.4	4.73849	0.838274	5		1.89084	0.618272	5		1.05103	0.0523419	3		0.687415	0.0516757	3			3.4	1.53266	0.0892241	5		0.81107	0.189378	4		1.08173	0.199077	4		0.583024	0.0268341	3			3.4	1.07085	0.0585914	4		0.564713	0.306792	4		0.156514	0.0238586	3		0.290497
3.417	3.24977	0.461506	5		2.62259	0.772506	5		1.02999	0.0509002	3		0.706248	0.0958075	3			3.417	1.88279	0.0977703	5		1.26908	0.3217	4		1.08679	0.162363	4		0.547678	0.0192727	3			3.417	1.1022	0.0683107	4		0.558165	0.293397	4		0.152508	0.0174928	3		0.286904
3.433	3.6434	0.436915	5		1.6691	0.813614	5		1.07472	0.0321739	3		0.676037	0.0524061	3			3.433	1.91404	0.286642	5		1.54668	0.583655	4		1.11267	0.170754	4		0.577736	0.0409295	3			3.433	1.1179	0.0746596	4		0.614118	0.30829	4		0.155872	0.0200325	3		0.291322
3.45	4.05726	0.527125	5		1.80739	0.55872	5		1.05141	0.0288551	3		0.723196	0.0767437	3			3.45	1.60959	0.153327	5		1.1433	0.624909	4		1.08343	0.140372	4		0.590992	0.0326941	3			3.45	1.01512	0.0642006	4		0.48814	0.34523	4		0.1487	0.0239472	3		0.274214
3.467	5.21486	0.977899	5		1.77666	0.422251	5		1.02142	0.0146298	3		0.836199	0.149542	3			3.467	1.47307	0.202897	5		1.17644	0.504356	4		1.08491	0.154655	4		0.547533	0.0249307	3			3.467	1.1252	0.0708297	4		0.41516	0.511999	4		0.153367	0.017706	3		0.281241
3.483	4.89362	1.46166	5		1.8721	0.547687	5		1.03165	0.00624541	3		0.70106	0.0697349	3			3.483	1.67737	0.327243	5		1.08668	0.586806	4		1.07142	0.157859	4		0.572815	0.0188471	3			3.483	1.23876	0.06074	4		0.531625	0.402776	4		0.150327	0.0261554	3		0.261911
3.5	4.02249	0.452518	5		2.30009	0.586505	5		1.01345	0.0149275	3		0.744883	0.0575186	3			3.5	1.90246	0.462748	5		1.1625	0.462073	4		1.04927	0.136973	4		0.577155	0.0413333	3			3.5	1.07053	0.123114	4		0.461642	0.388715	4		0.151924	0.026771	3		0.294935
3.517	4.01713	0.470698	5		2.45719	0.726483	5		1.03987	0.0332028	3		0.717921	0.047023	3			3.517	1.74728	0.286521	5		1.18132	0.344988	4		1.07849	0.129571	4		0.572073	0.0403313	3			3.517	0.990928	0.0705565	4		0.693168	0.400181	4		0.144419	0.0156959	3		0.269883
3.533	4.4475	0.635093	5		1.80858	0.662008	5		1.02288	0.0377552	3		0.744592	0.0826981	3			3.533	1.81729	0.184589	5		1.18949	0.585134	4		1.06123	0.158425	4		0.573229	0.0273226	3			3.533	1.08289	0.0511042	4		0.37781	0.206564	4		0.153927	0.0200149	3		0.27935
3.55	4.47291	0.537365	5		3.50687	1.0337	5		0.996552	0.0457956	3		0.754837	0.078084	3			3.55	1.69218	0.22213	5		0.676585	0.325205	4		1.1131	0.160178	4		0.562537	0.0459517	3			3.55	0.988449	0.0754804	4		0.518442	0.167524	4		0.144811	0.023704	3		0.269693
3.567	3.73718	0.364728	5		2.31961	0.969772	5		1.02295	0.0314879	3		0.738509	0.067452	3			3.567	1.77407	0.294433	5		0.871771	0.361486	4		1.05001	0.150401	4		0.57317	0.019178	3			3.567	0.873043	0.0892355	4		0.773643	0.414588	4		0.159167	0.0140359	3		0.246654
3.583	4.83641	0.768835	5		2.5394	0.565193	5		1.00138	0.0373974	3		0.720755	0.110462	3			3.583	1.42542	0.402109	5		0.810402	0.331735	4		1.08332	0.14512	4		0.568252	0.0194972	3			3.583	1.05206	0.098692	4		0.648736	0.559177	4		0.175425	0.0292621	3		0.248085
3.6	5.12973	0.988692	5		2.83439	1.2477	5		1.01976	0.0190376	3		0.77562	0.0758612	3			3.6	1.75061	0.395272	5		1.28189	0.660299	4		1.02593	0.158637	4		0.589098	0.0331221	3			3.6	1.05027	0.131546	4		0.539265	0.501325	4		0.160062	0.0291704	3		0.271503
3.617	4.64896	0.980376	5		2.45058	0.776584	5		1.02017	0.0332702	3		0.76521	0.0848008	3			3.617	1.18361	0.344419	5		1.16173	0.40114	4		1.04597	0.142118	4		0.57327	0.0201874	3			3.617	1.02921	0.021118	4		0.510885	0.442678	4		0.144411	0.0279455	3		0.277451
3.633	5.02879	0.987014	5		3.5527	0.764526	5		1.00673	0.0365962	3		0.793897	0.100873	3			3.633	1.091	0.0912316	5		0.96124	0.476496	4		1.08761	0.164023	4		0.596767	0.0546021	3			3.633	1.00404	0.0874085	4		0.639729	0.422192	4		0.151649	0.0174231	3		0.265186
3.65	5.7165	1.54939	5		1.62994	0.450155	5		1.06827	0.0296711	3		0.783329	0.0871741	3			3.65	1.32699	0.48607	5		1.17326	0.504733	4		1.12479	0.190037	4		0.559438	0.0078353	3			3.65	1.05416	0.0693656	4		0.662757	0.513498	4		0.145273	0.0205984	3		0.291018
3.667	4.89807	0.583085	5		2.54497	0.77799	5		1.04328	0.03685	3		0.752572	0.078229	3			3.667	1.72091	0.262471	5		1.10507	0.705204	4		1.11555	0.205721	4		0.548875	0.010829	3			3.667	1.13156	0.0581175	4		0.43384	0.420637	4		0.149512	0.024525	3		0.279039
3.683	4.4881	0.35889	5		2.92487	0.684356	5		1.03043	0.0224838	3		0.767702	0.101743	3			3.683	1.38442	0.275993	5		0.870771	0.484601	4		1.09093	0.170782	4		0.605899	0.019801	3			3.683	1.16877	0.141315	4		0.475677	0.297159	4		0.151721	0.0203483	3		0.249201
3.7	4.52911	0.732205	5		2.37293	0.447434	5		1.04008	0.0384169	3		0.765918	0.113174	3			3.7	1.39117	0.502461	5		1.24841	0.475284	4		1.08432	0.189142	4		0.565038	0.0410787	3			3.7	1.12013	0.147363	4		0.710641	0.430396	4		0.155245	0.023262	3		0.277596
3.717	3.97692	0.576817	5		3.15969	0.811533	5		1.02741	0.0229548	3		0.766277	0.0621996	3			3.717	1.69597	0.503076	5		1.25069	0.636554	4		1.04266	0.145361	4		0.554114	0.0399991	3			3.717	1.05852	0.146928	4		0.508286	0.446735	4		0.158403	0.0251986	3		0.268583
3.733	5.27025	1.06577	5		2.40815	0.32811	5		1.01559	0.0220663	3		0.710962	0.0753389	3			3.733	1.35953	0.362089	5		0.952788	0.520903	4		1.06282	0.162571	4		0.607731	0.0264539	3			3.733	1.12281	0.102305	4		0.725839	0.342382	4		0.145308	0.0233149	3		0.258626
3.75	4.39313	0.463096	5		2.54164	0.694649	5		1.02214	0.0375905	3		0.702104	0.0663651	3			3.75	1.33615	0.457452	5		1.11016	0.70216	4		1.09636	0.174601	4		0.600756	0.0195342	3			3.75	1.20295	0.132675	4		0.842781	0.492022	4		0.149671	0.0260999	3		0.26405
3.767	5.66183	1.76907	5		2.6733	0.244743	5		1.03698	0.0420031	3		0.731536	0.0833875	3			3.767	0.954944	0.395281	5		0.770844	0.499662	4		1.06734	0.161777	4		0.536744	0.0544797	3			3.767	1.19893	0.114638	4		0.713339	0.386277	4		0.150077	0.0206674	3		0.27951
3.783	5.6222	1.18858	5		3.0113	0.931825	5		1.04544	0.0322547	3		0.750216	0.0832145	3			3.783	1.16008	0.392349	5		0.937172	0.466924	4		1.09466	0.160053	4		0.566253	0.0585333	3			3.783	1.26988	0.184363	4		0.501154	0.293907	4		0.14224	0.0249154	3		0.280065
3.8	5.11625	1.34661	5		3.61224	0.522749	5		1.06924	0.0358674	3		0.713008	0.0776639	3			3.8	1.12969	0.361253	5		1.27302	0.794991	4		1.06184	0.148047	4		0.590341	0.0308179	3			3.8	1.13795	0.129081	4		0.441962	0.260938	4		0.15173	0.0190958	3		0.243551
3.817	4.05554	0.333189	5		3.78426	0.473093	5		1.03274	0.0475785	3		0.824858	0.142234	3			3.817	1.19409	0.38906	5		1.11416	0.487892	4		1.05507	0.147651	4		0.606885	0.0439202	3			3.817	1.19569	0.125838	4		0.454488	0.234122	4		0.149149	0.0217865	3		0.279117
3.833	5.18203	1.23158	5		3.28009	0.329487	5		1.06317	0.0225707	3		0.790384	0.138076	3			3.833	0.930082	0.300258	5		1.11536	0.408323	4		1.08815	0.155181	4		0.612061	0.0293087	3			3.833	1.25748	0.0462635	4		0.631523	0.292979	4		0.132825	0.0353909	3		0.267084
3.85	5.16912	1.31071	5		4.63962	0.693924	5		1.04241	0.0432986	3		0.714383	0.0343501	3			3.85	1.32529	0.292285	5		1.05585	0.195621	4		1.07582	0.140343	4		0.571582	0.0239342	3			3.85	1.06713	0.186464	4		0.708233	0.518204	4		0.137985	0.0162589	3		0.257918
3.867	4.93535	0.829514	5		3.56088	0.721351	5		0.987217	0.0081499	3		0.746487	0.0754225	3			3.867	1.05182	0.438085	5		1.36431	0.537232	4		1.08829	0.178574	4		0.565675	0.0265652	3			3.867	1.01963	0.20286	4		0.353894	0.219732	4		0.153318	0.0224756	3		0.277746
3.883	5.18163	1.56025	5		2.95416	0.452226	5		1.02253	0.0206541	3		0.810429	0.148854	3			3.883	1.05495	0.341328	5		1.08907	0.419876	4		1.10384	0.170114	4		0.566059	0.0134667	3			3.883	1.22737	0.0958242	4		0.436687	0.209818	4		0.155763	0.0226428	3		0.275651
3.9	5.22644	1.38546	5		2.89844	0.382625	5		0.988247	0.0243642	3		0.778687	0.0597703	3			3.9	0.621998	0.699703	5		1.04101	0.476962	4		1.0672	0.136764	4		0.576535	0.0447154	3			3.9	0.787092	0.207569	4		0.417771	0.269009	4		0.146365	0.0286794	3		0.252217
3.917	5.16471	1.27412	5		3.08939	0.749969	5		0.965492	0.0227224	3		0.746858	0.100213	3			3.917	0.494534	0.500179	5		0.809651	0.532925	4		1.05306	0.147067	4		0.582239	0.0414323	3			3.917	0.77815	0.169181	4		0.688198	0.282364	4		0.147768	0.0198446	3		0.268454
3.933	5.1696	0.908235	5		3.01663	0.460418	5		0.991299	0.0418275	3		0.721973	0.0525595	3			3.933	0.76222	0.474311	5		1.42106	0.397366	4		1.13081	0.177306	4		0.584019	0.041255	3			3.933	1.04692	0.18728	4		0.712933	0.257614	4		0.153719	0.0246711	3		0.274215
3.95	6.00632	1.92936	5		3.21233	0.775907	5		1.01546	0.0199336	3		0.761919	0.0762355	3			3.95	1.5118	0.599191	5		1.12114	0.625567	4		1.08765	0.168575	4		0.574092	0.0222867	3			3.95	1.13747	0.139986	4		0.484664	0.290607	4		0.147616	0.0198446	3		0.286218
3.967	5.81509	1.24309	5		3.12711	0.434471	5		0.985702	0.0378673	3		0.803748	0.116549	3			3.967	0.969581	0.419659	5		1.06931	0.567033	4		1.08023	0.160239	4		0.567909	0.0170101	3			3.967	1.17044	0.306768	4		0.535562	0.431398	4		0.148238	0.0254671	3		0.258962
3.983	4.4641	0.733439	5		3.12288	0.92074	5		0.987116	0.0388079	3		0.848662	0.130823	3			3.983	0.890567	0.29942	5		0.912307	0.535543	4		1.07841	0.15543	4		0.547795	0.019508	3			3.983	1.09887	0.190982	4		0.575914	0.305465	4		0.145992	0.0213137	3		0.267247
4	5.76198	1.20739	5		2.62544	0.859318	5		1.02089	0.0234805	3		0.854782	0.158431	3			4	0.985295	0.451896	5		1.22341	0.135357	4		1.07558	0.164166	4		0.594877	0.0360324	3			4	1.02137	0.138167	4		0.544817	0.270305	4		0.1518	0.021212	3		0.260454
4.017	6.24952	1.63905	5		2.7685	0.504525	5		0.964515	0.0169715	3		0.774716	0.0695089	3			4.017	0.766245	0.411452	5		0.86471	0.197428	4		1.09756	0.171631	4		0.593902	0.0194606	3			4.017	1.09237	0.318722	4		0.674595	0.357094	4		0.160479	0.0258704	3		0.284456
4.033	7.51457	2.47348	5		3.7071	0.755887	5		1.02152	0.0248514	3		0.792977	0.0869633	3			4.033	0.848679	0.400218	5		1.5142	0.208155	4		1.07173	0.151239	4		0.547191	0.0265485	3			4.033	0.981761	0.214431	4		0.528022	0.374851	4		0.156323	0.0169242	3		0.276654
4.05	4.86557	0.905546	5		3.19412	0.691668	5		1.02524	0.0328417	3		0.808345	0.109162	3			4.05	0.713327	0.472182	5		0.78156	0.254764	4		1.00847	0.150254	4		0.575269	0.0466418	3			4.05	1.00317	0.222285	4		0.591201	0.380076	4		0.163252	0.0239798	3		0.286226
4.067	6.67787	1.83083	5		3.8982	0.836728	5		0.988312	0.0213762	3		0.750471	0.0443048	3			4.067	0.818117	0.349302	5		0.920189	0.310123	4		1.1084	0.19284	4		0.615558	0.0733358	3			4.067	0.916872	0.265515	4		0.428183	0.492147	4		0.162299	0.0195781	3		0.316663
4.083	5.83873	1.0311	5		2.38762	0.754688	5		1.03762	0.0168516	3		0.806846	0.119803	3			4.083	1.22204	0.462367	5		0.953348	0.298318	4		1.06025	0.182997	4		0.604213	0.0384708	3			4.083	0.799965	0.164729	4		0.927219	0.477837	4		0.168778	0.0279048	3		0.299361
4.1	9.18499	3.93454	5		1.77699	0.512502	5		1.0384	0.0430254	3		0.727155	0.0590732	3			4.1	1.21364	0.762425	5		2.01846	0.931295	4		1.1184	0.168114	4		0.573314	0.0387429	3			4.1	0.49623	0.252074	4		0.51041	0.516267	4		0.167623	0.0285961	3		0.300762
4.117	5.01701	0.556904	5		2.15672	0.659087	5		1.08092	0.0454736	3		0.813852	0.117808	3			4.117	1.29432	0.677952	5		1.84565	0.889799	4		1.12203	0.157973	4		0.619686	0.0273727	3			4.117	0.778894	0.211093	4		0.47264	0.351623	4		0.151507	0.025248	3		0.321072
4.133	6.00297	1.22787	5		1.22315	0.664621	5		1.05829	0.0545446	3		0.808285	0.0949258	3			4.133	0.88637	0.663328	5		1.77908	0.73929	4		1.15986	0.193932	4		0.594673	0.0243094	3			4.133	0.799591	0.290301	4		0.182005	0.522841	4		0.155458	0.0257815	3		0.314529
4.15	4.62812	0.477243	5		2.84892	0.421986	5		1.05352	0.0208931	3		0.758298	0.0589169	3			4.15	0.711345	0.52566	5		1.28317	0.554638	4		1.09987	0.173631	4		0.623059	0.0291161	3			4.15	0.885672	0.172415	4		0.431571	0.355698	4		0.140863	0.0224144	3		0.306782
4.167	5.52947	1.38503	5		2.45124	0.623126	5		1.07462	0.0248719	3		0.755808	0.0883401	3			4.167	0.912094	0.311315	5		1.39577	0.321737	4		1.06839	0.176001	4		0.599089	0.0393638	3			4.167	0.72715	0.308535	4		0.465032	0.446832	4		0.150227	0.0262331	3		0.291815
4.183	6.16161	1.88555	5		2.68496	0.738253	5		1.03933	0.00208813	3		0.718422	0.0413231	3			4.183	1.16362	0.23192	5		1.83655	0.949362	4		1.11412	0.163633	4		0.613566	0.0319879	3			4.183	0.752171	0.349036	4		0.707263	0.332288	4		0.163873	0.0187804	3		0.280504
4.2	6.158	0.891068	5		2.04936	0.716117	5		1.05534	0.0161396	3		0.71638	0.0750249	3			4.2	1.67792	0.648515	5		1.3481	0.551216	4		1.12395	0.163177	4		0.605312	0.00286018	3			4.2	0.545892	0.234451	4		0.439691	0.398602	4		0.161276	0.0204968	3		0.262297
4.217	5.48105	1.08543	5		1.71632	1.4392	5		1.02424	0.00897735	3		0.838624	0.148415	3			4.217	1.24869	0.626793	5		1.283	0.76499	4		1.10608	0.179259	4		0.620201	0.0415948	3			4.217	0.770456	0.333421	4		0.295503	0.201406	4		0.141615	0.0282456	3		0.270237
4.233	5.48421	0.748669	5		3.4019	0.822729	5		1.04188	0.03994	3		0.861756	0.169009	3			4.233	1.235	0.507768	5		1.24622	0.745548	4		1.11065	0.172956	4		0.578298	0.0176829	3			4.233	0.72496	0.324258	4		0.510825	0.17765	4		0.14652	0.0222323	3		0.259545
4.25	6.87982	1.39735	5		2.73299	0.697076	5		1.03802	0.0547299	3		0.833512	0.134854	3			4.25	0.714605	1.08831	5		1.51728	0.655089	4		1.1229	0.165013	4		0.625848	0.0345944	3			4.25	0.847753	0.464298	4		0.458681	0.399733	4		0.151965	0.0260635	3		0.29744
4.267	7.52384	2.46669	5		3.74044	1.51153	5		1.06127	0.0419705	3		0.823228	0.143081	3			4.267	2.12106	0.958964	5		1.51291	0.711232	4		1.08323	0.167632	4		0.602324	0.0105147	3			4.267	0.991302	0.378261	4		0.377404	0.429193	4		0.149263	0.0267723	3		0.27918
4.283	7.44874	1.52814	5		2.64482	0.807396	5		1.01707	0.00807209	3		0.817687	0.101051	3			4.283	1.73064	0.466369	5		1.02665	0.517755	4		1.08409	0.17318	4		0.61121	0.011151	3			4.283	0.561193	0.199421	4		0.498055	0.226542	4		0.160381	0.0136993	3		0.26951
4.3	7.69356	2.18579	5		3.24075	0.839907	5		1.02612	0.0141139	3		0.752557	0.0588337	3			4.3	1.3416	0.420922	5		0.986667	0.684273	4		1.09828	0.149291	4		0.595383	0.0131213	3			4.3	0.745236	0.302614	4		0.711052	0.132237	4		0.150562	0.0257778	3		0.260472
4.317	6.59654	1.85562	5		2.06814	0.958728	5		1.05229	0.034091	3		0.74326	0.0534994	3			4.317	0.850156	0.40996	5		1.24127	1.30768	4		1.14786	0.186546	4		0.579812	0.0112256	3			4.317	0.810012	0.350843	4		0.230094	0.278499	4		0.156777	0.0231464	3		0.298099
4.333	5.59991	0.784437	5		2.70054	1.38605	5		1.05784	0.0377519	3		0.784052	0.102203	3			4.333	1.3575	0.603027	5		0.621128	0.640183	4		1.14941	0.152766	4		0.571521	0.0517506	3			4.333	0.776306	0.420316	4		0.221155	0.179689	4		0.154707	0.0206917	3		0.283965
4.35					3.94195	1.39637	5		1.03247	0.0127994	3		0.805333	0.12581	3			4.35	0.928036	0.328174	5		1.3457	0.914837	4		1.13429	0.168101	4		0.595412	0.026696	3			4.35	0.851	0.389992	4		0.306937	0.423884	4		0.147488	0.0251774	3		0.291561
4.367					2.51846	0.963583	5		1.03181	0.049729	3		0.829393	0.119662	3			4.367	1.07351	0.272125	5		1.31863	0.602706	4		1.13124	0.160255	4		0.574905	0.0498509	3			4.367	0.757707	0.252344	4		0.466841	0.337305	4		0.162585	0.0228608	3		0.283015
4.383					3.39764	0.777075	5		1.07448	0.0267219	3		0.8217	0.127169	3			4.383	1.40372	0.752582	5		1.42652	0.851617	4		1.13982	0.204751	4		0.604968	0.0261992	3			4.383	0.701909	0.317942	4		0.392262	0.315959	4		0.159363	0.0287442	3		0.270892
4.4					3.54359	1.06887	5		1.0395	0.0570551	3		0.827992	0.0939069	3			4.4	1.74038	0.42193	5		1.15214	0.889545	4		1.19687	0.184199	4		0.634373	0.0394871	3			4.4	0.66953	0.289638	4		0.710185	0.51728	4		0.161302	0.0254778	3		0.293621
4.417					3.82092	1.38617	5		1.0301	0.0199117	3		0.79867	0.130588	3			4.417	1.05894	0.684206	5		1.03579	0.30043	4		1.10597	0.164411	4		0.601494	0.0277552	3			4.417	0.948355	0.289247	4		0.902131	0.341196	4		0.151152	0.0190728	3		0.283021
4.433					3.60532	1.04066	5		1.09227	0.0468456	3		0.822337	0.113043	3			4.433	0.991334	0.483443	5		0.756886	0.593689	4		1.16749	0.168747	4		0.636706	0.0512298	3			4.433	0.559943	0.305996	4		0.1982	0.252104	4		0.166043	0.022002	3		0.2827
4.45					2.27794	0.716366	5		1.06528	0.043788	3		0.770056	0.0882701	3			4.45	0.955482	0.194922	5		1.07539	0.724558	4		1.13842	0.18847	4		0.627164	0.0242626	3			4.45	0.805737	0.343974	4		1.00815	0.556333	4		0.159613	0.0198567	3		0.276092
4.467					2.74384	0.454874	5		1.05827	0.0584211	3		0.770366	0.0388649	3			4.467	2.29648	0.298596	5		1.82879	0.797929	4		1.18003	0.216861	4		0.661423	0.0740858	3			4.467	0.943557	0.363535	4		0.404247	0.356417	4		0.156692	0.0289601	3		0.279434
4.483					3.59982	1.02887	5		1.0813	0.0312844	3		0.765079	0.0756223	3			4.483	2.17551	0.861054	5		0.810685	0.626876	4		1.13754	0.226163	4		0.66521	0.0524981	3			4.483	0.448134	0.22901	4		0.890622	0.618975	4		0.157991	0.0231876	3		0.283688
4.5					2.88208	0.522791	5		1.11146	0.0409646	3		0.783609	0.0406734	3			4.5	1.3088	0.545818	5		1.55833	1.01573	4		1.10005	0.197606	4		0.651676	0.0572872	3			4.5	0.627498	0.373042	4		0.208269	0.700145	4		0.1535	0.0245996	3		0.301159
4.517					3.08754	0.725111	5		1.05034	0.0306652	3		0.746477	0.0889509	3			4.517	1.11008	0.479592	5		1.94023	1.01857	4		1.15319	0.191688	4		0.652646	0.0546529	3			4.517	0.883744	0.307739	4		0.336761	0.46389	4		0.150737	0.0295824	3		0.283248
4.533					3.30289	0.545754	5		1.09001	0.0350173	3		0.75417	0.048275	3			4.533	1.63954	0.320838	5		1.6969	0.289301	4		1.18544	0.199753	4		0.674104	0.0668281	3			4.533	0.9824	0.157748	4		0.298751	0.333918	4		0.145943	0.0167731	3		0.281075
4.55					3.62667	0.848253	5		1.07028	0.0186807	3		0.753834	0.0552661	3			4.55	2.63944	0.751289	5		1.77944	0.592885	4		1.14154	0.189693	4		0.650362	0.0238309	3			4.55	0.397594	0.335845	4		0.104376	0.231085	4		0.147786	0.0194274	3		0.295699
4.567					2.37246	1.04204	5		1.06575	0.0255976	3		0.859344	0.147614	3			4.567	1.73221	1.00917	5		2.09715	0.872041	4		1.18775	0.185202	4		0.585849	0.0500961	3			4.567	0.627637	0.492237	4		0.349172	0.142718	4		0.162903	0.030377	3		0.281305
4.583					3.09662	0.812676	5		1.06909	0.028537	3		0.80284	0.113256	3			4.583	2.34435	0.93383	5		1.48167	0.812316	4		1.15605	0.200234	4		0.585388	0.0285675	3			4.583	0.71862	0.1464	4		0.20231	0.523414	4		0.161842	0.0281972	3		0.259642
4.6					2.28239	0.872962	5		1.06188	0.0318364	3		0.835682	0.0979278	3			4.6	2.05884	0.513402	5		1.65565	0.628415	4		1.1429	0.194877	4		0.596222	0.0054006	3			4.6	0.984759	0.280196	4		0.183519	0.161059	4		0.167898	0.0287634	3		0.27406
4.617					1.81542	0.327769	5		1.06478	0.0329835	3		0.81241	0.145095	3			4.617	2.36693	0.838087	5		1.82899	0.902134	4		1.14829	0.192572	4		0.608837	0.0656468	3			4.617	1.036	0.437815	4		0.590255	0.375936	4		0.157073	0.0312615	3		0.267886
4.633					3.25652	1.07344	5		1.01378	0.0167381	3		0.825598	0.121881	3			4.633	1.10956	0.597431	5		2.19954	0.894812	4		1.08344	0.165297	4		0.603375	0.0681797	3			4.633	0.864155	0.341656	4		0.601969	0.238536	4		0.159995	0.0196748	3		0.296157
4.65					2.29243	1.02528	5		1.05906	0.0110865	3		0.839483	0.11798	3			4.65	1.41741	0.833419	5		2.36273	0.785389	4		1.16914	0.213602	4		0.6662	0.0539503	3			4.65	1.05615	0.583292	4		0.679382	0.465006	4		0.16325	0.0199475	3		0.272067
4.667					3.51942	1.03008	5		1.09089	0.0612962	3		0.768183	0.0973642	3			4.667	1.53514	0.479663	5		1.22461	0.878189	4		1.13572	0.210792	4		0.627279	0.0345337	3			4.667	0.818861	0.326047	4		1.00798	0.560444	4		0.160349	0.0195118	3		0.280896
4.683					3.92376	1.18715	5		1.02897	0.0212323	3		0.791362	0.181517	3			4.683	1.76519	0.984438	5		1.32775	0.616646	4		1.15634	0.179776	4		0.590449	0.0694887	3			4.683	0.771302	0.320097	4		0.491002	0.611017	4		0.159496	0.0233453	3		0.275776
4.7					3.34392	0.781801	5		1.07182	0.0515063	3		0.751311	0.0720309	3			4.7	2.32259	0.769031	5		1.58283	0.895691	4		1.11687	0.180637	4		0.630793	0.0373985	3			4.7	0.480449	0.322172	4		0.450024	0.330605	4		0.157807	0.0290788	3		0.297474
4.717					2.45642	0.632758	5		1.09601	0.00927629	3		0.81981	0.134188	3			4.717	2.07368	0.534631	5		2.23403	1.02955	4		1.1325	0.193762	4		0.593321	0.0498087	3			4.717	0.713869	0.135603	4		1.36645	0.735834	4		0.165325	0.0206458	3		0.286278
4.733					4.09011	0.398768	5		1.05884	0.0307748	3		0.740515	0.082123	3			4.733	2.0136	0.751305	5		1.75663	0.996063	4		1.15134	0.222306	4		0.617419	0.0308125	3			4.733	0.51529	0.21523	4		0.982232	0.569201	4		0.161073	0.027088	3		0.279018
4.75					3.03118	0.511095	5		1.02343	0.0438396	3		0.819175	0.133179	3			4.75	1.41722	0.73806	5		1.95334	0.804095	4		1.18136	0.210847	4		0.627461	0.0786856	3			4.75	0.727012	0.112539	4		0.932791	0.952473	4		0.157176	0.025167	3		0.303085
4.767					3.84905	0.543801	5		1.10378	0.0460838	3		0.793692	0.112214	3			4.767	1.40615	0.76947	5		1.2571	0.783412	4		1.20784	0.172644	4		0.626923	0.074046	3			4.767	0.714139	0.328584	4		0.532906	0.728118	4		0.156285	0.0243051	3		0.291178
4.783					5.01684	1.2217	5		1.07634	0.0332973	3		0.79115	0.152267	3			4.783	1.20271	1.10369	5		1.27983	0.391349	4		1.16963	0.152938	4		0.650565	0.0601475	3			4.783	0.664806	0.222291	4		1.19332	1.05726	4		0.161114	0.0249518	3		0.257924
4.8					3.80436	1.17612	5		1.08152	0.0431633	3		0.78618	0.0983393	3			4.8	1.79706	0.376284	5		1.36885	0.33868	4		1.20704	0.200476	4		0.714212	0.0682507	3			4.8	0.588187	0.487603	4		1.0054	0.46081	4		0.159947	0.0258492	3		0.299184
4.817					2.78484	0.684792	5		1.03187	0.0359852	3		0.838306	0.195681	3			4.817	1.32236	0.58531	5		1.62064	0.306169	4		1.18078	0.191216	4		0.685294	0.0646806	3			4.817	0.703199	0.4063	4		1.04022	0.850637	4		0.162627	0.0219709	3		0.288587
4.833					2.95881	0.953478	5		1.10299	0.0341697	3		0.765668	0.0950481	3			4.833	1.05258	0.391125	5		1.09573	0.520752	4		1.18529	0.220151	4		0.627246	0.0273945	3			4.833	0.939979	0.426272	4		0.181277	0.10144	4		0.178716	0.0186344	3		0.294934
4.85					2.80758	0.754471	5		1.0653	0.0471989	3		0.812531	0.102745	3			4.85	1.35966	0.449572	5		1.75823	0.972835	4		1.17892	0.204569	4		0.689736	0.0239252	3			4.85	0.545028	0.515672	4		0.497366	0.590989	4		0.174751	0.030902	3		0.289834
4.867					1.90851	0.594109	5		1.03119	0.0157118	3		0.867129	0.158146	3			4.867	1.67835	0.321849	5		1.1949	0.586764	4		1.1487	0.17153	4		0.669913	0.0500496	3			4.867	1.07427	0.489969	4		0.913912	0.622266	4		0.159521	0.0313097	3		0.282496
4.883					0.450831	0.747895	5		1.08336	0.0157606	3		0.706813	0.0608035	3			4.883	3.00012	0.99374	5		1.51323	1.07608	4		1.12426	0.182799	4		0.681841	0.0339312	3			4.883	0.800612	0.511691	4		0.712415	0.732473	4		0.150644	0.0258506	3		0.287385
4.9					4.4213	1.59102	5		1.00575	0.0255651	3		0.84296	0.16162	3			4.9	1.84794	0.552408	5		2.37687	1.36879	4		1.20396	0.196708	4		0.708534	0.0480511	3			4.9	0.583473	0.51603	4		0.254917	0.444439	4		0.152751	0.0225934	3		0.280318
4.917					4.26259	1.53699	5		1.08707	0.0586334	3		0.721278	0.0738693	3			4.917	1.48498	0.584277	5		2.07434	0.665929	4		1.21652	0.202592	4		0.68236	0.0494035	3			4.917	0.481294	0.498314	4		0.502017	0.515503	4		0.172338	0.0196297	3		0.296242
4.933					3.65377	0.776248	5		1.07147	0.0236523	3		0.718077	0.0753128	3			4.933	1.36263	0.496083	5		1.82961	0.542604	4		1.20112	0.193161	4		0.688071	0.0274791	3			4.933	0.741027	0.59974	4		0.848982	0.795671	4		0.147695	0.0346598	3		0.281788
4.95					2.43451	1.03122	5		1.02728	0.0256854	3		0.805279	0.134407	3			4.95	1.64567	0.549067	5		1.09936	0.3498	4		1.16771	0.203926	4		0.710578	0.0355438	3			4.95	0.878924	0.73293	4		0.75923	0.707663	4		0.160147	0.0268332	3		0.271626
4.967					2.75596	0.772479	5		1.07419	0.0322261	3		0.91161	0.165856	3			4.967	1.31219	0.957312	5		0.742296	0.763291	4		1.23727	0.216329	4		0.681942	0.0677674	3			4.967	0.745009	0.751178	4		0.974576	1.11494	4		0.158514	0.0215196	3		0.269914
4.983					1.46668	1.37423	5		1.0612	0.0338007	3		0.841266	0.221425	3			4.983	1.12297	0.583411	5		1.62994	0.568937	4		1.22694	0.17617	4		0.709038	0.030617	3			4.983	1.12923	0.508774	4		0.731972	0.778303	4		0.152743	0.0236952	3		0.297691
5					1.09029	0.363572	5		1.05468	0.0493952	3		0.746225	0.0629927	3			5	2.09292	1.33265	5		2.10547	0.892844	4		1.18517	0.208773	4		0.708981	0.0550892	3			5	0.954276	0.788476	4		0.322816	0.595398	4		0.152158	0.0223103	3		0.257171
[truncated: 2 more columns]

## Sheet: Fig 3C
Figure 3C-m 7R-250 nM ParB											Figure 3C-n 4R-250 nM ParB											Figure 3C-o 3R-250 nM ParB											Figure 3D-p none-250 nM ParB
		ParAD60E-GFP				ParB							ParAD60E-GFP				ParB							ParAD60E-GFP				ParB							ParAD60E-GFP				ParB
Time(min)		Mean	SEM	n		Mean	SEM	n			Time(min)		Mean	SEM	n		Mean	SEM	n			Time(min)		Mean	SEM	n		Mean	SEM	n			Time(min)		Mean	SEM	n		Mean	SEM	n
0		5355.1	1030.9	2		342.85	46.75	2			0		6953.3	828.8	2		693.3	467.5	2			0		7856.85	857.15	2		608.1	330.5	2			0		6058.85	212.55	2		812.15	271.15	2
0.017		5317.75	1026.75	2		386.1	29.9	2			0.017		6913.05	653.95	2		548	257.1	2			0.017		7753.7	778.4	2		533.35	300.55	2			0.017		6029.1	258.4	2		680.45	323.65	2
0.033		5320.65	1016.25	2		384.5	3.6	2			0.033		7111	684.2	2		644.3	145.8	2			0.033		7268.3	750.9	2		472.9	270.3	2			0.033		5986.25	178.65	2		689.3	272.9	2
0.05		5257.15	1023.35	2		375.65	47.85	2			0.05		6563.75	551.05	2		861.2	21.3	2			0.05		6950.9	249.9	2		698.45	469.95	2			0.05		5671.45	122.95	2		1117.25	159.15	2
0.067		5115.3	917	2		500.95	62.65	2			0.067		6483.65	528.35	2		1241	15.3	2			0.067		6938.1	254	2		1012.25	660.65	2			0.067		5670.8	207.5	2		1343.15	243.35	2
0.083		4942.1	798.3	2		422.75	96.95	2			0.083		6364.75	492.05	2		1488.05	308.75	2			0.083		6862.2	105.8	2		1362.7	1003.6	2			0.083		5622.1	228.3	2		1913.1	120.5	2
0.1		4825.7	748.3	2		727.85	69.85	2			0.1		6308	553.9	2		1919.9	284.3	2			0.1		6566.65	402.95	2		1448.1	904.5	2			0.1		5664.5	203.8	2		2094.7	140.8	2
0.117		4833	794.3	2		673.05	74.05	2			0.117		6313.4	531.9	2		2375.3	512.4	2			0.117		6567.65	400.55	2		2057.6	1338	2			0.117		5677.05	170.05	2		2208.35	103.55	2
0.133		4759.2	721.1	2		883.05	99.15	2			0.133		6209	582.6	2		2790.95	676.55	2			0.133		6730	180.2	2		2057.85	1356.15	2			0.133		5675.3	138.1	2		2443.55	222.45	2
0.15		4842.25	816.05	2		948.4	91.5	2			0.15		6277.6	535.2	2		3178.15	772.15	2			0.15		6563.15	324.15	2		2489.75	1574.25	2			0.15		5671.15	161.05	2		2304.6	268.3	2
0.167		4779.45	770.85	2		1165.15	141.15	2			0.167		6272	587.4	2		3640.85	839.65	2			0.167		6530	316.3	2		2481.35	1493.65	2			0.167		5754.25	175.15	2		2290.05	391.55	2
0.183		4782.2	800.8	2		1232.85	131.55	2			0.183		6147.8	677.4	2		3886	767	2			0.183		6423.55	423.75	2		3001.05	1889.45	2			0.183		5585.35	229.65	2		2398.2	342.3	2
0.2		4788.65	810.15	2		1392.1	92.1	2			0.2		6172.4	601.6	2		4305.3	682	2			0.2		6574.05	301.65	2		2960.3	1807.7	2			0.2		5685.85	193.85	2		2497.05	479.55	2
0.217		4710.3	758.1	2		1573.7	219.1	2			0.217		6280.7	626.3	2		4519.45	654.95	2			0.217		6333.75	462.35	2		3201.65	1812.75	2			0.217		5625.05	182.25	2		2291.8	519.8	2
0.233		4797.95	849.45	2		1784.45	327.55	2			0.233		6214.5	599.4	2		4954.55	309.15	2			0.233		6274.85	450.95	2		3149.9	1757.3	2			0.233		5584.8	219.4	2		2398.95	532.05	2
0.25		4780.85	836.35	2		1994	322	2			0.25		6230.75	635.25	2		5190.65	209.15	2			0.25		6327.6	340.6	2		3167.15	1598.35	2			0.25		5657.3	196.3	2		2151	588.2	2
0.267		4772.65	832.85	2		2279.9	430.3	2			0.267		6160.55	584.45	2		5545.6	59.5	2			0.267		6410.45	239.75	2		3409.8	1835.7	2			0.267		5644.9	231.6	2		2298.75	516.45	2
0.283		4735.85	781.75	2		2399.75	435.45	2			0.283		6125.35	624.75	2		5839.9	215.4	2			0.283		6318.55	330.35	2		3405.85	1684.65	2			0.283		5564.2	250.6	2		2404.15	569.25	2
0.3		4710.55	796.85	2		2597.3	459.9	2			0.3		6182.9	588.9	2		6251.95	495.75	2			0.3		6321.95	306.95	2		3255.7	1458.9	2			0.3		5686.6	237.2	2		2332.55	566.25	2
0.317		4708	786.3	2		2825.15	636.75	2			0.317		6109.9	669.5	2		6324.6	615.5	2			0.317		6285.35	310.25	2		3515.05	1753.35	2			0.317		5650.9	260	2		2300.7	507	2
0.333		4723.85	805.95	2		3067.25	657.45	2			0.333		6092.7	698.1	2		6569.75	813.35	2			0.333		6162.1	435.3	2		3406.15	1339.35	2			0.333		5564.25	326.65	2		2291.9	611.2	2
0.35		4761.2	839.1	2		3223	673.7	2			0.35		6069.9	588.6	2		7024.1	1097.6	2			0.35		6242.85	254.85	2		3450.75	1602.25	2			0.35		5616.65	322.65	2		2299.65	513.25	2
0.367		4681.95	772.95	2		3405.4	656.1	2			0.367		6043.7	670.9	2		7062.8	1243.3	2			0.367		6252.3	302.3	2		3518.15	1396.05	2			0.367		5641.1	212.6	2		2351.85	553.25	2
0.383		4727.5	812.6	2		3469.75	630.25	2			0.383		6011.3	713.7	2		7471.25	1558.75	2			0.383		6131.9	330.1	2		3531.65	1412.65	2			0.383		5639.3	244.4	2		2438	501.9	2
0.4		4722.5	813	2		3848.3	773.7	2			0.4		5932.1	620.8	2		7305.75	1260.35	2			0.4		6293	308.3	2		3499	1291.3	2			0.4		5645.1	248.6	2		2311.1	548.2	2
0.417		4681.05	801.05	2		3916.4	742	2			0.417		5954.45	661.95	2		7578.9	1549.9	2			0.417		6189.65	472.05	2		3424.65	1219.45	2			0.417		5631.5	200.9	2		2447.7	472.8	2
0.433		4674.6	789.4	2		4225.85	835.35	2			0.433		5964.15	614.15	2		7793.8	1771.5	2			0.433		6046.85	382.95	2		3452.85	1270.15	2			0.433		5601.25	238.65	2		2242.15	512.25	2
0.45		4696.95	819.65	2		4301.3	882.6	2			0.45		5940.65	600.85	2		7906.1	1952.7	2			0.45		6002.5	460.2	2		3414.05	1180.85	2			0.45		5628	232.1	2		2366.25	488.75	2
0.467		4746.85	871.85	2		4744.6	1071.5	2			0.467		5961.8	585.2	2		7984.45	1856.25	2			0.467		6090.7	343.5	2		3325.65	1150.25	2			0.467		5548.25	259.45	2		2305.7	483.8	2
0.483		4655.55	793.35	2		4877.65	1241.45	2			0.483		5972.05	533.55	2		8032	2002.9	2			0.483		6101	151.9	2		3342.95	988.35	2			0.483		5627.7	237.4	2		2284.1	468.7	2
0.5		4707.1	838.4	2		5163.6	1128.1	2			0.5		5982.45	599.75	2		8130.5	2217.1	2			0.5		6073.4	279.9	2		3165.15	995.45	2			0.5		5620.1	257.1	2		2376.9	413.9	2
0.517		4609.65	736.95	2		5322	1027.2	2			0.517		6005.9	694.2	2		8060.5	2229.1	2			0.517		6150	281.2	2		3350.2	808.5	2			0.517		5602.4	240.3	2		2249.95	421.45	2
0.533		4638.15	778.55	2		5575.55	1210.55	2			0.533		5932.85	652.75	2		7806.8	2030.3	2			0.533		5994.65	329.95	2		3437.75	854.45	2			0.533		5589.7	271.3	2		2256	419.3	2
0.55		4619.05	772.95	2		5478.75	1044.05	2			0.55		5955.75	633.55	2		7975.95	2155.25	2			0.55		5982.05	300.55	2		3441.95	847.25	2			0.55		5600.9	201.4	2		2441.25	387.15	2
0.567		4619.6	755.8	2		5925.3	1283	2			0.567		5866.05	609.15	2		7651.75	2029.25	2			0.567		5965.4	298.4	2		3310.8	715.1	2			0.567		5587.4	271.8	2		2328.4	421	2
0.583		4581.9	719.8	2		6199.65	1572.45	2			0.583		5969.3	642.2	2		7640.7	2016.7	2			0.583		5822.7	385.9	2		3313.65	844.35	2			0.583		5550.9	299.6	2		2192.6	414.3	2
0.6		4625.85	788.45	2		6335.05	1489.55	2			0.6		5888.25	639.35	2		7448.3	1740.2	2			0.6		6031.9	365.5	2		3273.4	730.8	2			0.6		5585.15	255.75	2		2171.2	445	2
0.617		4660.85	828.45	2		6534.5	1467.9	2			0.617		5945.2	690.1	2		7451.2	1817.4	2			0.617		5843.35	396.95	2		3279.9	748.7	2			0.617		5583.65	249.65	2		2275.2	385.1	2
0.633		4685.4	863.3	2		6716.75	1522.65	2			0.633		5901	630.6	2		7518.35	2069.85	2			0.633		5910.75	435.25	2		3409.95	914.45	2			0.633		5583.75	238.35	2		2188.05	416.75	2
0.65		4624.65	790.05	2		6868.6	1609	2			0.65		5847.4	698.8	2		7439.75	1983.65	2			0.65		5816.25	408.55	2		3481.75	836.45	2			0.65		5575.15	247.05	2		2163.2	477.9	2
0.667		4589.6	758.1	2		6867.8	1609.7	2			0.667		5861.8	671.1	2		7291.95	1862.65	2			0.667		5895.85	235.35	2		3310.35	738.55	2			0.667		5563.95	256.45	2		2146.85	481.75	2
0.683		4669.4	831.2	2		7039.95	1581.15	2			0.683		5851.2	609.8	2		7302.65	1923.85	2			0.683		5810.3	373.6	2		3270.7	950.1	2			0.683		5472.5	365.6	2		2306.95	383.45	2
0.7		4630.6	829.5	2		7263.9	1740.4	2			0.7		5881.8	665.8	2		7147.35	1795.05	2			0.7		5783.7	423.5	2		3262.5	828.4	2			0.7		5533.6	282	2		2213.9	443.5	2
0.717		4644.35	836.75	2		7316.25	1719.15	2			0.717		5884.2	672.3	2		6993.1	1744.7	2			0.717		5882.05	291.45	2		3503.4	1004.2	2			0.717		5527.15	276.15	2		2109	451.7	2
0.733		4649.35	831.55	2		7249.25	1519.65	2			0.733		5839.95	629.95	2		6960.1	1722.4	2			0.733		5769.15	390.85	2		3163.85	842.55	2			0.733		5525.45	296.35	2		2272.75	477.95	2
0.75		4663.8	881.4	2		7462.65	1738.35	2			0.75		5905.95	600.25	2		6954.65	1747.55	2			0.75		5743	440.9	2		3297.75	990.85	2			0.75		5561.75	241.85	2		2232.2	398.7	2
0.767		4589.95	802.85	2		7510.95	1914.25	2			0.767		5783.9	633.4	2		6968.95	1714.95	2			0.767		5771.95	375.25	2		3200.1	850.3	2			0.767		5569.75	256.45	2		2284.5	434.3	2
0.783		4604.55	826.05	2		7705.2	1816.4	2			0.783		5932.15	613.85	2		6947.05	1727.05	2			0.783		5882.45	248.85	2		3329.7	953.6	2			0.783		5536.8	255.5	2		2267.6	395.9	2
0.8		4575.3	777.3	2		7690.3	1867.5	2			0.8		5898.95	601.65	2		7078.95	1805.85	2			0.8		5697.8	402.5	2		3221.1	747.4	2			0.8		5498.3	303.7	2		2298.3	429.2	2
0.817		4625.35	844.25	2		7756.75	1748.45	2			0.817		5839.45	699.75	2		7216.65	1915.85	2			0.817		5774.2	300.3	2		3281.75	826.35	2			0.817		5534.1	233.5	2		2346.9	356.7	2
0.833		4530.5	760.1	2		7671.8	1685.5	2			0.833		5870.4	663.1	2		7013.7	1788.7	2			0.833		5716.45	430.05	2		3338.25	851.15	2			0.833		5497.05	267.35	2		2261.1	408.5	2
0.85		4608.6	834	2		7895.9	1996.3	2			0.85		5862.35	624.55	2		7025.65	1842.25	2			0.85		5823.8	234.5	2		3114.8	765.9	2			0.85		5530.9	276.6	2		2252.9	425.8	2
0.867		4614.5	852.2	2		7679.75	1736.65	2			0.867		5870.65	637.35	2		7027.5	1902.8	2			0.867		5794.4	249.9	2		3039.1	796.3	2			0.867		5519.55	308.05	2		2303.3	354	2
0.883		4593.85	845.75	2		8030.1	1922.1	2			0.883		5796.7	662.1	2		6743.2	1544.7	2			0.883		5612.9	391.2	2		3139.35	858.95	2			0.883		5544.6	265.9	2		2195.25	378.65	2
0.9		4593.45	826.35	2		7903.95	1932.35	2			0.9		5843.8	664.2	2		6737.65	1551.05	2			0.9		5806.85	252.75	2		3149.15	919.75	2			0.9		5573.5	265	2		2299.85	376.55	2
0.917		4543.35	731.85	2		7892.15	1701.75	2			0.917		5792.3	649.8	2		6665.15	1530.75	2			0.917		5604.4	357.8	2		3093.6	809.2	2			0.917		5493.6	298.5	2		2331.95	379.95	2
0.933		4568.65	772.45	2		7996.8	1911.1	2			0.933		5792.6	681.4	2		6742.65	1601.15	2			0.933		5663.05	412.35	2		3298.6	994.4	2			0.933		5569.35	252.95	2		2333.25	348.85	2
0.95		4663.65	787.95	2		7952.5	1936.1	2			0.95		5819.6	663.9	2		6579.9	1411.8	2			0.95		5759.75	247.75	2		3168.65	952.85	2			0.95		5486.9	253.4	2		2265.7	440.9	2
0.967		4524.35	764.25	2		7997.45	1943.75	2			0.967		5812.5	651.9	2		6600.5	1483.3	2			0.967		5629.25	396.65	2		3372.45	1084.75	2			0.967		5495.1	327.9	2		2322.4	392.2	2
0.983		4519.7	751.9	2		8025.75	2082.45	2			0.983		5750.8	650	2		6607.35	1517.45	2			0.983		5466.4	431.4	2		3235.4	1139.7	2			0.983		5395.05	397.85	2		2436.45	418.75	2
1		4563.9	797.5	2		7993.65	1879.55	2			1		5771.7	662.1	2		6750.05	1620.95	2			1		5615.65	292.05	2		3222.25	1042.35	2			1		5512.75	261.25	2		2325.4	437.6	2
1.017		4611.05	819.45	2		8079.25	1821.25	2			1.017		5786.75	664.25	2		6739.55	1747.15	2			1.017		5668.15	257.05	2		3141.25	952.35	2			1.017		5473.3	267.9	2		2330.35	415.95	2
1.033		4588.9	840.6	2		7959.1	1724.4	2			1.033		5789.75	651.35	2		6496.25	1566.15	2			1.033		5629	361.3	2		3137.2	906	2			1.033		5497.35	274.65	2		2427.65	354.95	2
1.05		4577.7	835.4	2		7832.6	1588.6	2			1.05		5793.6	668.1	2		6428.2	1557	2			1.05		5519.35	362.15	2		2966.9	683.9	2			1.05		5509.15	249.45	2		2170.25	423.95	2
1.067		4498.7	775.7	2		7908.95	1607.95	2			1.067		5738.35	554.35	2		6566.2	1517.2	2			1.067		5515.85	324.35	2		3093.65	973.95	2			1.067		5507.25	292.35	2		2070.65	382.95	2
1.083		4560.75	839.15	2		7801.55	1484.75	2			1.083		5732.45	647.35	2		6526.45	1542.75	2			1.083		5593	316.2	2		2964.7	881.1	2			1.083		5494.95	283.85	2		2313.1	385.2	2
1.1		4560.8	826.3	2		7812.65	1539.25	2			1.1		5804.25	624.65	2		6516.15	1626.95	2			1.1		5533.2	285.4	2		2913.35	779.25	2			1.1		5512.65	269.45	2		2297.4	349.4	2
1.117		4571.7	876.1	2		7624.1	1462.2	2			1.117		5772.7	628.8	2		6483.05	1448.45	2			1.117		5601.45	373.65	2		3138.45	974.65	2			1.117		5513.8	274.3	2		2376	297.4	2
1.133		4534.6	817.7	2		7870.7	1499.6	2			1.133		5798.15	626.65	2		6265.3	1298.6	2			1.133		5619.1	208	2		3170.55	841.05	2			1.133		5412.95	317.65	2		2135.85	447.55	2
1.15		4523.1	821.9	2		7751.1	1585.1	2			1.15		5758.5	696	2		6581.3	1672	2			1.15		5512.1	247.6	2		3066.9	748.4	2			1.15		5476.3	276.3	2		2159.6	421.8	2
1.167		4544.8	836.6	2		7766.3	1608.4	2			1.167		5746.95	622.05	2		6329.75	1475.35	2			1.167		5504.9	342.1	2		3017.6	884.3	2			1.167		5473.65	317.55	2		2205.85	371.75	2
1.183		4548.6	837.7	2		7735.8	1583	2			1.183		5757.25	587.75	2		6432.45	1562.05	2			1.183		5590.7	225.3	2		3053.3	968.1	2			1.183		5473.85	232.55	2		2304.3	357.6	2
1.2		4491.1	782.7	2		7737.5	1661.1	2			1.2		5714.4	577.9	2		6436.85	1598.25	2			1.2		5550.45	410.55	2		2988.8	839.8	2			1.2		5501.5	234.5	2		2256.95	393.85	2
1.217		4483.15	804.75	2		7791.95	1578.25	2			1.217		5723.25	700.15	2		6425.6	1649.3	2			1.217		5624.85	186.65	2		3243.95	937.15	2			1.217		5459.7	285.1	2		2239.7	363.9	2
1.233		4502.2	802.8	2		7755.9	1670.8	2			1.233		5662.55	628.35	2		6241.15	1394.05	2			1.233		5460.1	450	2		3117.5	1076.6	2			1.233		5490.45	274.35	2		2227.05	432.15	2
1.25		4488.1	797	2		7811.6	1694.9	2			1.25		5758.6	576.8	2		6295.85	1362.25	2			1.25		5516.7	256.6	2		3103.2	896.8	2			1.25		5435.15	261.85	2		2186.5	447	2
1.267		4541.35	839.55	2		7688.15	1550.35	2			1.267		5699.85	664.35	2		6322.6	1485.9	2			1.267		5543.3	235.3	2		3186.05	984.55	2			1.267		5434	235.8	2		2091.45	440.45	2
1.283		4513.9	807.9	2		7662.65	1647.75	2			1.283		5759.8	641.4	2		6442.95	1662.45	2			1.283		5421.95	404.55	2		3077.8	862.5	2			1.283		5460.65	276.45	2		2243.05	425.45	2
1.3		4518.25	823.25	2		7645.3	1513.8	2			1.3		5697.3	616.6	2		6346.2	1491.6	2			1.3		5466.5	294.8	2		2740.6	837.4	2			1.3		5505.45	310.05	2		2175.15	404.05	2
1.317		4540.9	841.1	2		7686.2	1583.6	2			1.317		5671.85	533.05	2		6383.05	1516.05	2			1.317		5552	296.4	2		3248.45	889.05	2			1.317		5466.9	299.1	2		2241.2	317.4	2
1.333		4541.75	840.05	2		7575.3	1350.9	2			1.333		5616.35	650.55	2		6375.35	1547.65	2			1.333		5521.85	213.15	2		2779.7	793.8	2			1.333		5451.75	236.15	2		2371.8	380	2
1.35		4498.4	814.1	2		7590.1	1662.9	2			1.35		5600.15	598.85	2		6300.65	1601.75	2			1.35		5488	287.6	2		2965.5	744.2	2			1.35		5430.8	356.2	2		2317.75	293.45	2
1.367		4522.85	831.35	2		7498.4	1417	2			1.367		5582.1	673.6	2		6318.85	1575.95	2			1.367		5406.3	253.9	2		2947.2	893.9	2			1.367		5480.3	282.4	2		2076.5	391.9	2
1.383		4513.3	816.6	2		7369.7	1386.8	2			1.383		5648.05	608.25	2		6174.25	1507.35	2			1.383		5380.8	342.5	2		2990.7	853.7	2			1.383		5392.25	306.05	2		2243.1	365.2	2
1.4		4555.45	849.75	2		7424.85	1278.65	2			1.4		5606.75	553.75	2		6298.3	1613.1	2			1.4		5488.55	324.05	2		3117.55	950.65	2			1.4		5421.9	341.7	2		2151.35	393.75	2
1.417		4450.15	789.25	2		7499.05	1454.35	2			1.417		5631	634.4	2		6165.9	1528.5	2			1.417		5384.65	404.95	2		3014.65	930.05	2			1.417		5440.85	267.65	2		2185.2	424.3	2
1.433		4512.4	829	2		7607.9	1613.5	2			1.433		5670.85	669.75	2		6013.25	1408.35	2			1.433		5378.65	317.15	2		3034.9	807.1	2			1.433		5445.3	267.2	2		2126.75	419.65	2
1.45		4417.05	731.15	2		7422.45	1246.15	2			1.45		5582.05	638.65	2		6021.15	1375.35	2			1.45		5279.05	242.65	2		2896.25	776.25	2			1.45		5519.4	240.8	2		2236.9	367.2	2
1.467		4445	752.9	2		7457.5	1282.5	2			1.467		5683.5	628.8	2		5947.05	1323.35	2			1.467		5273.5	347.9	2		3034.4	963.1	2			1.467		5481.95	314.25	2		2304.95	315.45	2
1.483		4479.75	804.15	2		7387.95	1213.55	2			1.483		5565.8	571.9	2		5898.55	1304.05	2			1.483		5398.05	306.85	2		2825.4	785.3	2			1.483		5477.2	265.5	2		2137.9	425.8	2
1.5		4480.05	802.25	2		7344.15	1121.75	2			1.5		5619.95	613.55	2		5979.5	1389.9	2			1.5		5281.85	427.05	2		2992.65	889.95	2			1.5		5410.8	305.6	2		2111.3	363.2	2
1.517		4468	785.5	2		7427.65	1267.35	2			1.517		5675.25	581.05	2		5844.75	1273.35	2			1.517		5386.4	246.3	2		2862.2	891	2			1.517		5429.65	312.15	2		2285.25	359.85	2
1.533		4498.4	822.9	2		7439.85	1335.75	2			1.533		5646.05	609.25	2		6002	1386.3	2			1.533		5394.9	322.4	2		3000.8	906.2	2			1.533		5431.7	305.7	2		2060.8	404.7	2
1.55		4507.6	827.1	2		7487.8	1262.2	2			1.55		5650.9	694.6	2		5776.25	1177.15	2			1.55		5342.4	358.9	2		2897.95	803.05	2			1.55		5357.5	363.4	2		2153.15	404.65	2
1.567		4469.6	810.9	2		7387.1	1244.4	2			1.567		5628.2	639.1	2		5709.65	1114.25	2			1.567		5409.65	174.45	2		3119.5	860.2	2			1.567		5449.75	283.65	2		2141.9	370.4	2
1.583		4500.5	810	2		7250.85	1355.55	2			1.583		5544.85	685.75	2		5855.75	1322.95	2			1.583		5230.5	411.4	2		2986.35	810.65	2			1.583		5365	313.8	2		2219.5	397.7	2
1.6		4439.65	761.65	2		7332.5	1263.6	2			1.6		5638.2	567.2	2		6024.15	1476.85	2			1.6		5453	136.3	2		2938.25	719.75	2			1.6		5403.45	281.05	2		2285.95	343.95	2
1.617		4477.45	818.15	2		7159.15	1198.95	2			1.617		5478.05	629.25	2		5757.85	1230.45	2			1.617		5206.65	395.65	2		2803.05	798.65	2			1.617		5419.15	317.95	2		2232.95	334.75	2
1.633		4473.2	812	2		7218.4	1303.4	2			1.633		5590.25	670.65	2		5896.95	1327.05	2			1.633		5298.1	401.6	2		3070.55	820.15	2			1.633		5555.8	526.2	2		2115.2	360.4	2
1.65		4506.35	847.15	2		7423.95	1371.15	2			1.65		5534.55	587.05	2		5848.45	1286.05	2			1.65		5257.35	338.85	2		2843	744.7	2			1.65		5663.15	538.45	2		2229.95	378.25	2
1.667		4452.65	764.35	2		7345.2	1223.2	2			1.667		5556.25	591.75	2		5837.65	1199.55	2			1.667		5190.3	342.7	2		2982.7	897	2			1.667		5469.4	351	2		2304.1	300.2	2
1.683		4447.05	778.05	2		7313.6	1174.1	2			1.683		5617.3	634.2	2		5843.55	1233.45	2			1.683		5308.75	300.25	2		2954.5	782.1	2			1.683		5349.25	337.05	2		2064.95	426.55	2
1.7		4507.65	860.45	2		7344.25	1330.15	2			1.7		5590.7	605.8	2		5901.95	1361.85	2			1.7		5210.45	378.75	2		3110.55	1060.25	2			1.7		5404.2	327.6	2		2213.6	355	2
1.717		4491.1	834.7	2		7383.15	1314.15	2			1.717		5604.25	663.25	2		5850.2	1256.5	2			1.717		5226.2	416.3	2		2864.2	956.3	2			1.717		5392.15	317.95	2		2247.65	424.05	2
1.733		4454.75	802.25	2		7421.45	1388.95	2			1.733		5595.7	675.3	2		5741.55	1207.85	2			1.733		5378.75	293.95	2		2969.1	942.5	2			1.733		5430.5	287.2	2		2306.35	342.15	2
1.75		4440.1	790.9	2		7496.15	1330.85	2			1.75		5568.2	720.6	2		5924.3	1360.3	2			1.75		5239.55	306.55	2		2913.85	877.75	2			1.75		5345.55	349.75	2		2318.45	355.05	2
1.767		4422.75	777.85	2		7283.9	1193.8	2			1.767		5568.05	706.55	2		5890.3	1239.7	2			1.767		5196.3	336.7	2		2922.7	806.8	2			1.767		5403.15	305.95	2		2206.45	367.25	2
1.783		4474.55	832.25	2		7429.2	1226.4	2			1.783		5494.7	592.8	2		5905.45	1318.15	2			1.783		5305	294.5	2		2818.25	828.15	2			1.783		5455.5	230.2	2		2140.2	376.1	2
1.8		4443	790.7	2		7701.9	1085.3	2			1.8		5481.15	560.75	2		5645.15	1093.35	2			1.8		5347.95	268.05	2		2945.6	1025.6	2			1.8		5427.65	290.65	2		2130.05	364.05	2
1.817		4476.4	833.6	2		7360.4	1153.2	2			1.817		5483	606.6	2		5991.7	1535.3	2			1.817		5249.05	339.75	2		2960	962.5	2			1.817		5369.15	280.95	2		2239.8	389.9	2
1.833		4449.7	830.6	2		7388.15	1247.55	2			1.833		5508.05	578.95	2		5904.2	1349.8	2			1.833		5296.6	328.2	2		3159.3	1166.5	2			1.833		5326.8	363.2	2		2233.2	383	2
1.85		4489.9	860.8	2		7450.35	1387.65	2			1.85		5457.95	626.65	2		5766.4	1174.9	2			1.85		5146.15	331.95	2		2942.8	1029.5	2			1.85		5351.4	330.2	2		2261.25	448.25	2
1.867		4406.1	774.6	2		7518.25	1401.55	2			1.867		5478.8	532.6	2		5785.55	1265.25	2			1.867		5199.8	317.1	2		2842.95	790.55	2			1.867		5405.75	311.85	2		2327.3	363.4	2
1.883		4395.85	775.55	2		7323.05	1126.75	2			1.883		5534.45	557.25	2		5947.05	1417.95	2			1.883		5160.85	393.25	2		2802.55	954.85	2			1.883		5346.95	293.65	2		2262.65	321.15	2
1.9		4421	795	2		7334.3	1130.9	2			1.9		5483.65	517.45	2		6099.1	1587.7	2			1.9		5219.9	323.3	2		2816.8	953.8	2			1.9		5377.1	317.3	2		2194.6	364.7	2
1.917		4461.15	840.65	2		7289.45	1321.25	2			1.917		5498.35	564.35	2		5983.05	1439.75	2			1.917		5298.8	301.9	2		2827.6	1039.4	2			1.917		5414.25	287.75	2		2255.05	348.55	2
1.933		4361.15	738.85	2		7358.9	1218.2	2			1.933		5501.8	557.9	2		6021.25	1515.25	2			1.933		5263.35	271.05	2		2773.6	965.8	2			1.933		5331.4	351	2		2080.95	419.35	2
1.95		4492.3	859.4	2		7253.75	1365.75	2			1.95		5463.05	603.95	2		5722.3	1247.7	2			1.95		5045.85	460.95	2		2856.9	893.9	2			1.95		5314.25	344.15	2		2145.85	376.25	2
1.967		4451.35	825.45	2		7069.25	1127.15	2			1.967		5468.2	619	2		5825.85	1467.85	2			1.967		5248.8	218.7	2		2773.15	978.75	2			1.967		5335.7	351.8	2		2200.2	361.7	2
1.983		4460.2	852.5	2		7291.9	1226.5	2			1.983		5508.3	597.2	2		5822.6	1345.5	2			1.983		5048.15	402.45	2		2656.1	705.1	2			1.983		5407	327.4	2		2221.15	355.55	2
2		4439.25	811.55	2		7094.25	1060.25	2			2		5435.15	641.85	2		5873.45	1382.95	2			2		5272	281.8	2		2746.35	746.85	2			2		5358.35	324.25	2		2187.8	294.3	2
2.017		4425.05	812.45	2		7209.4	1289.9	2			2.017		5455.7	637.1	2		5897.95	1430.75	2			2.017		5071.75	301.65	2		2771.8	816.1	2			2.017		5273.25	415.05	2		2168.1	324.4	2
2.033		4453.05	846.15	2		7388.7	1163.7	2			2.033		5535.5	599.2	2		5675.9	1347.6	2			2.033		5031.75	421.95	2		2700.85	893.25	2			2.033		5324.25	326.05	2		2150.95	346.95	2
2.05		4397.05	768.45	2		7277.4	1221	2			2.05		5535.5	653	2		5876.75	1419.05	2			2.05		5109.9	356.8	2		2794.3	788.3	2			2.05		5353	313.8	2		2129.85	354.55	2
2.067		4410.6	802.5	2		7268.1	1115.7	2			2.067		5514.55	728.95	2		5852.25	1469.55	2			2.067		5086.4	394	2		2860.45	887.05	2			2.067		5358.55	308.85	2		2248.2	316.3	2
2.083		4388.6	775.4	2		7054.1	1004.3	2			2.083		5486.95	666.65	2		5869.2	1262.3	2			2.083		5025.15	420.65	2		2735.05	763.65	2			2.083		5347.4	314.2	2		2014.35	417.65	2
2.1		4367.85	768.35	2		7213.45	1079.05	2			2.1		5497.1	679.7	2		5793.45	1241.35	2			2.1		4976.65	367.85	2		2652.35	696.85	2			2.1		5293.9	347.4	2		2141.65	333.45	2
2.117		4340	751.7	2		7245.35	1169.45	2			2.117		5489.45	648.05	2		5837.75	1454.75	2			2.117		5171.4	269.8	2		2749.85	763.75	2			2.117		5353.75	302.95	2		2114	314.6	2
2.133		4412.2	837.5	2		7111.45	1074.35	2			2.133		5487.7	693.2	2		5961.2	1523.6	2			2.133		5128.2	253	2		2814.25	872.35	2			2.133		5391	312.5	2		2166	328.8	2
2.15		4396.2	822.6	2		7098.6	1094.6	2			2.15		5511.8	700.9	2		5664.3	1209.7	2			2.15		5046.05	338.05	2		2824.05	968.95	2			2.15		5340.6	328.3	2		2112.95	376.55	2
2.167		4383.7	788.2	2		7147.45	922.75	2			2.167		5516.45	678.65	2		5892.65	1398.15	2			2.167		5001.45	401.35	2		2850.25	853.75	2			2.167		5320.25	359.55	2		2190.1	242	2
2.183		4360.15	771.45	2		7043.7	983	2			2.183		5384.8	604.4	2		5765.85	1423.05	2			2.183		5127	316.7	2		2801.55	881.45	2			2.183		5321.05	323.65	2		2195.05	354.75	2
2.2		4432.3	861.8	2		7136.45	1131.55	2			2.2		5505.9	696.7	2		5825.7	1372.1	2			2.2		5076.2	459.3	2		2833.35	1043.75	2			2.2		5352.5	329.4	2		2153.85	302.35	2
2.217		4412.65	852.95	2		7083.65	1005.25	2			2.217		5396.4	597.7	2		5716.15	1371.35	2			2.217		5123	367.3	2		2750.6	931.2	2			2.217		5360.25	294.25	2		2138.4	312.1	2
2.233		4332.4	772.3	2		7144.1	1036.2	2			2.233		5441.5	615	2		5780.9	1329.8	2			2.233		5033.65	454.95	2		2717.95	921.85	2			2.233		5350.7	345.8	2		2250.15	333.85	2
2.25		4426.8	839.9	2		7020.1	961.2	2			2.25		5433	659.7	2		5790.15	1396.15	2			2.25		5084.2	367.1	2		2676.4	935	2			2.25		5301.45	337.35	2		2211.85	337.85	2
2.267		4365	794.4	2		7110.9	926.6	2			2.267		5439.4	650.1	2		5808.4	1410.2	2			2.267		5132.2	299.1	2		2819.8	919.8	2			2.267		5294.45	320.95	2		2276.45	312.95	2
2.283		4387.35	813.85	2		7096.65	965.65	2			2.283		5394.6	553.8	2		5886.15	1384.45	2			2.283		5042.8	373.6	2		2653.1	912.4	2			2.283		5356.85	306.95	2		2180.65	365.65	2
2.3		4356.7	780	2		7261.45	1191.95	2			2.3		5470.4	600.4	2		5866.45	1407.45	2			2.3		5104.75	283.65	2		2806.6	912.3	2			2.3		5375.5	334.8	2		2158.95	405.65	2
2.317		4320.2	745.6	2		7150.1	988.6	2			2.317		5499.65	677.75	2		5816.45	1403.65	2			2.317		4957.8	364.1	2		2634.1	764.6	2			2.317		5302.8	302.2	2		2167.4	365.9	2
2.333		4405.25	827.65	2		7107.3	999.2	2			2.333		5393.2	735.9	2		5769	1373.1	2			2.333		4953.25	381.85	2		2740.15	839.05	2			2.333		5322.2	291.7	2		2130.15	383.95	2
2.35		4354	779.1	2		7002.4	944.6	2			2.35		5513.45	639.75	2		5933.15	1505.25	2			2.35		4895.95	427.15	2		2492.6	719.1	2			2.35		5327.85	333.85	2		2198.8	396	2
2.367		4383.2	827	2		7021.95	939.05	2			2.367		5381.75	682.05	2		5933.9	1563.4	2			2.367		5046.2	235	2		2613.85	935.95	2			2.367		5350.35	320.85	2		2131.25	414.75	2
2.383		4421.2	840.4	2		7185.35	1137.05	2			2.383		5465.1	624.2	2		5808.45	1471.55	2			2.383		5053	238.1	2		2783.95	1006.25	2			2.383		5281.25	364.85	2		2255.7	438.6	2
2.4		4372	835.5	2		7100.65	1058.15	2			2.4		5375.8	712.5	2		5653.15	1319.45	2			2.4		4951.15	367.15	2		2870.3	945.8	2			2.4		5281.55	322.25	2		2123.65	522.75	2
2.417		4370	823.2	2		7258.3	1112.2	2			2.417		5423.5	637	2		5604.45	1335.65	2			2.417		4935.85	419.05	2		2908.75	961.55	2			2.417		5272.15	322.85	2		2174.85	446.65	2
2.433		4377.3	819.4	2		7102.6	876.8	2			2.433		5419.75	595.25	2		5825.55	1541.95	2			2.433		4955.1	325.1	2		2802.75	943.45	2			2.433		5321.7	333.6	2		2111.2	480.2	2
2.45		4386.3	819.9	2		7144.45	983.35	2			2.45		5405.95	651.65	2		5769.3	1627.7	2			2.45		4998.15	235.95	2		2680.5	821.4	2			2.45		5317.65	301.75	2		2182.25	470.55	2
2.467		4400.75	831.15	2		7221.9	988.1	2			2.467		5441.85	672.15	2		5580.05	1378.35	2			2.467		4953.85	455.35	2		2746.85	982.15	2			2.467		5337.2	333.7	2		2156.7	394.7	2
2.483		4376.35	810.65	2		7098.8	940.3	2			2.483		5425.55	711.85	2		5406.65	1108.95	2			2.483		4950.15	409.05	2		2743.45	974.35	2			2.483		5285.1	348.1	2		2215.4	353.1	2
2.5		4380.75	826.65	2		7053.05	921.85	2			2.5		5402.25	666.65	2		5479.25	1228.95	2			2.5		4947.25	344.05	2		2607.75	743.05	2			2.5		5370.05	297.95	2		2256.2	338.6	2
2.517		4384.2	836.4	2		7053.9	964.9	2			2.517		5377.3	694.4	2		5680.9	1536.6	2			2.517		5087.85	231.35	2		2561.4	775.7	2			2.517		5285.1	339.3	2		2166.7	429.5	2
2.533		4369.7	828.4	2		6988.95	981.15	2			2.533		5378.25	592.25	2		5499.5	1280	2			2.533		4874.2	396.1	2		2615.9	890	2			2.533		5233.75	379.55	2		2276.45	262.75	2
2.55		4375.5	846.9	2		7198.6	918.2	2			2.55		5427.85	629.65	2		5494.95	1224.55	2			2.55		4906.3	408.7	2		2622.15	614.45	2			2.55		5301.95	310.25	2		2191.05	319.75	2
2.567		4349.1	802.6	2		7110	983.6	2			2.567		5451.9	694.4	2		5470.7	1277.2	2			2.567		4940.05	327.95	2		2497.8	626.6	2			2.567		5324.6	345.7	2		2036.35	387.15	2
2.583		4312.05	779.65	2		7088.8	968.8	2			2.583		5376.35	736.25	2		5483.85	1397.65	2			2.583		5019.8	358.8	2		2652.45	824.65	2			2.583		5231.7	373.8	2		2256.1	230.1	2
2.6		4378.25	848.55	2		6981.2	898.9	2			2.6		5387.45	679.85	2		5373.05	1146.75	2			2.6		4953.1	332.1	2		2878.55	938.55	2			2.6		5296.05	348.25	2		2162.2	323.3	2
2.617		4373.1	835.1	2		7112.65	993.45	2			2.617		5342.65	609.75	2		5294.6	1245.3	2			2.617		4838.5	402.3	2		2657.25	754.15	2			2.617		5282.8	328.6	2		2214.45	299.95	2
2.633		4289.75	765.75	2		7014.95	801.35	2			2.633		5387.25	687.95	2		5616.8	1486.7	2			2.633		4872.35	340.35	2		2488	878.9	2			2.633		5283.75	318.55	2		2131.4	455.3	2
2.65		4338.5	803.4	2		7006.85	963.15	2			2.65		5361.35	700.55	2		5293.1	1122.2	2			2.65		4900.95	318.75	2		2622.1	717.9	2			2.65		5265.95	336.75	2		2212.85	287.65	2
2.667		4267.65	741.65	2		6899.05	906.85	2			2.667		5401.8	627.6	2		5299.7	1208.6	2			2.667		4974.85	233.85	2		2758.85	877.15	2			2.667		5197.2	368.4	2		2196.05	287.85	2
2.683		4353.5	819.3	2		6891.7	928.6	2			2.683		5345.1	721.4	2		5291.45	1250.75	2			2.683		4984.55	311.75	2		2622.65	856.75	2			2.683		5259.8	317.8	2		2190.85	343.55	2
2.7		4317.55	773.95	2		6938.65	907.45	2			2.7		5448.35	667.85	2		5435.9	1264	2			2.7		4786.35	398.15	2		2567.15	638.55	2			2.7		5209.1	338.9	2		2263.25	292.85	2
2.717		4340.6	819.3	2		7164.7	1014.4	2			2.717		5360	667.5	2		5346.45	1285.85	2			2.717		5063.25	195.25	2		2693.7	686.2	2			2.717		5266.3	326.3	2		2221.55	255.55	2
2.733		4325.9	826	2		6979.2	780.6	2			2.733		5380.4	700.8	2		5433.9	1431.5	2			2.733		4829.75	451.65	2		2609.95	797.25	2			2.733		5251.8	341.4	2		2157.15	307.05	2
2.75		4342.85	825.15	2		7111.8	957.8	2			2.75		5380.15	684.35	2		5123.3	1113.2	2			2.75		4980	274.7	2		2624	725.1	2			2.75		5284.5	327.7	2		2242.45	286.05	2
2.767		4354.45	843.85	2		6989.15	971.05	2			2.767		5342.3	716.8	2		5109.8	1060.1	2			2.767		4926.9	320.7	2		2675.1	813.3	2			2.767		5272.1	327.7	2		2141.4	306.2	2
2.783		4369.7	858.8	2		6876.35	839.75	2			2.783		5413.75	640.45	2		5158.75	1167.85	2			2.783		4978.2	285.8	2		2779.85	850.05	2			2.783		5255.5	339.3	2		2157.3	326.8	2
2.8		4311.4	814.8	2		6733.1	778.8	2			2.8		5345.8	651	2		5255.6	1196.4	2			2.8		4837.45	402.75	2		2864.45	870.45	2			2.8		5245.9	309	2		2262.7	320.5	2
2.817		4305.3	791.6	2		7030.05	1008.95	2			2.817		5438.35	646.55	2		5280.5	1289.8	2			2.817		4794.5	472.8	2		3014.75	945.85	2			2.817		5238.8	318	2		2297.85	329.05	2
2.833		4335.1	844.2	2		6893.45	681.65	2			2.833		5325.7	753	2		5212.85	1102.45	2			2.833		4805	344.4	2		2622.75	698.45	2			2.833		5219.15	401.85	2		2177.15	407.15	2
2.85		4291.85	796.45	2		6644	760	2			2.85		5426.2	714.7	2		5445.5	1271.4	2			2.85		4825.95	399.05	2		2717.6	830.9	2			2.85		5167.65	402.95	2		2204.75	281.75	2
2.867		4357.85	869.25	2		6714.75	745.15	2			2.867		5225.05	672.05	2		5310.85	1249.45	2			2.867		4967.9	197.8	2		2617.35	826.35	2			2.867		5250.05	352.75	2		2184.55	329.45	2
2.883		4283.95	779.95	2		6781.75	858.55	2			2.883		5333.05	689.95	2		5506.9	1435.5	2			2.883		4903.05	341.05	2		2715.7	733.5	2			2.883		5251.6	339.3	2		2103	335.2	2
2.9		4293.05	795.75	2		6774.4	696.3	2			2.9		5249.75	603.25	2		5251.05	1206.55	2			2.9		4866	296.9	2		2658.95	803.95	2			2.9		5248.95	284.95	2		2154.8	320.6	2
2.917		4269.6	782.7	2		6696.8	744.4	2			2.917		5356	727.4	2		5304.3	1178.8	2			2.917		4847.95	406.85	2		2544.9	707	2			2.917		5205	396.3	2		2035.8	359.3	2
2.933		4326.2	828.1	2		6625.65	760.35	2			2.933		5242.2	729.4	2		5213.45	1244.55	2			2.933		4799.1	422.2	2		2607.85	965.65	2			2.933		5196.95	340.25	2		2163.65	281.65	2
2.95		4341.3	845.8	2		6661.2	820.9	2			2.95		5246.55	687.85	2		5301	1296.6	2			2.95		4862.65	334.45	2		2538	773.9	2			2.95		5222.65	335.65	2		2287.3	302.7	2
2.967		4320.4	819.6	2		6666.05	793.95	2			2.967		5328.15	591.65	2		5173.5	1203	2			2.967		4820.6	306.1	2		2680.5	866.4	2			2.967		5254.45	329.85	2		2155.8	295	2
2.983		4252.5	776.3	2		6754.35	684.35	2			2.983		5301.45	690.65	2		5271.55	1271.45	2			2.983		4807.7	352.9	2		2578.35	816.75	2			2.983		5198.85	351.55	2		2246.45	310.25	2
3		4345.15	846.25	2		6615.4	601.8	2			3		5378.8	689.3	2		5190.9	1212.8	2			3		4871.6	398.2	2		2763.95	837.95	2			3		5173.1	377.4	2		2179.5	303	2
3.017		4263.65	783.95	2		6705.75	702.45	2			3.017		5328.15	684.65	2		5304.25	1256.85	2			3.017		4813.2	380.8	2		2808.4	917	2			3.017		5169	363.5	2		2105.9	363.3	2
3.033		4328.75	854.95	2		6643.1	685.6	2			3.033		5302.6	675.2	2		5251.9	1234.2	2			3.033		4758.6	412.7	2		2643.45	830.45	2			3.033		5246.65	341.85	2		2117.45	382.25	2
3.05		4250.85	791.35	2		6813.55	656.15	2			3.05		5336.25	605.55	2		5258	1228.7	2			3.05		4875.1	291.5	2		2729.15	879.55	2			3.05		5206.35	328.45	2		2246	297.1	2
3.067		4284	815.2	2		6832.4	798.9	2			3.067		5253	657.8	2		5364.3	1344.1	2			3.067		4737.9	456.2	2		2686.4	790.3	2			3.067		5224.8	358.8	2		2256.55	318.55	2
3.083		4303.1	845.6	2		6789.75	829.55	2			3.083		5342.5	620.1	2		5507.8	1438.8	2			3.083		4732.3	401	2		2691.95	702.95	2			3.083		5213.3	366.2	2		2234.8	301	2
3.1		4247.9	809.5	2		6811.45	873.85	2			3.1		5244.5	616	2		5200.65	1188.65	2			3.1		4782.1	429.9	2		2693.65	913.95	2			3.1		5163.75	433.25	2		2080.7	333.1	2
3.117		4252.05	826.95	2		6758.1	846.5	2			3.117		5255.75	591.95	2		5539.45	1506.75	2			3.117		4862.5	256.6	2		2585.95	862.95	2			3.117		5206.55	410.15	2		2132.45	356.25	2
3.133		4296.9	845.1	2		6875.8	848.4	2			3.133		5310.45	639.75	2		5157.8	1195.2	2			3.133		4767.8	366.2	2		2783.05	1017.35	2			3.133		5186.8	425.3	2		2244.75	292.85	2
3.15		4290.15	863.15	2		6769.85	766.35	2			3.15		5260.55	707.75	2		5281.05	1279.05	2			3.15		4745.45	240.05	2		2722.35	919.55	2			3.15		5216.6	333	2		2221.5	364.3	2
3.167		4281.2	868.6	2		6784.45	877.45	2			3.167		5267.95	641.95	2		5370.4	1421.8	2			3.167		4860.15	236.85	2		2589.2	933.9	2			3.167		5140.9	416.7	2		2214	337.6	2
3.183		4255.95	832.35	2		6709.15	638.45	2			3.183		5264.15	697.35	2		5185.4	1202.7	2			3.183		4881.9	301.1	2		2765.4	945.2	2			3.183		5184.6	346.9	2		2149.65	335.45	2
3.2		4279.9	873	2		6719.35	844.35	2			3.2		5274.7	660.8	2		5279.1	1281.5	2			3.2		4828.65	426.95	2		2772.95	1001.15	2			3.2		5181.5	383.6	2		2159.45	366.75	2
3.217		4283.85	871.15	2		6674.95	891.75	2			3.217		5236.65	692.55	2		5224.65	1317.35	2			3.217		4794	288.8	2		2842.3	1017.2	2			3.217		5205.15	351.05	2		2341.2	322.9	2
3.233		4179.45	784.15	2		6835.75	759.05	2			3.233		5258.25	672.05	2		5253.8	1361.2	2			3.233		4850.6	268.1	2		2613.4	804.4	2			3.233		5195.55	381.85	2		2278.9	357.5	2
3.25		4247.75	824.85	2		6757.85	730.65	2			3.25		5249.1	638.2	2		5096.15	1169.25	2			3.25		4846.75	292.05	2		2764	1007	2			3.25		5170.05	374.75	2		2056.45	344.65	2
3.267		4195.25	789.95	2		6859.75	854.75	2			3.267		5278.85	721.05	2		5172.7	1294.8	2			3.267		4650.8	420.7	2		2701.3	725.8	2			3.267		5206.5	365.6	2		2183.2	370.6	2
3.283		4218	794	2		6813.5	830.2	2			3.283		5215.85	591.05	2		5145.9	1154.9	2			3.283		4696.65	395.65	2		2713.45	1031.85	2			3.283		5199.5	374	2		2163.7	313.7	2
3.3		4228.3	813.3	2		6757.85	897.15	2			3.3		5227.25	749.05	2		5160	1186.5	2			3.3		4732.8	301.3	2		2703.45	960.35	2			3.3		5218.95	393.75	2		2151.55	375.55	2
3.317		4269.6	828.7	2		6733.35	861.95	2			3.317		5277.75	678.45	2		5054.45	1201.95	2			3.317		4824.9	255.4	2		2678.25	766.25	2			3.317		5179.85	386.45	2		2246.05	331.75	2
3.333		4261.35	849.65	2		6794.3	826.5	2			3.333		5215.3	677.5	2		5193.2	1297.7	2			3.333		4760.35	373.75	2		2888.5	955.8	2			3.333		5173.45	354.75	2		2120.25	330.05	2
3.35		4246.95	836.55	2		6679.5	845.2	2			3.35		5232.6	597	2		5239.25	1384.05	2			3.35		4814.65	327.95	2		2749.9	919.4	2			3.35		5102.3	438.6	2		2199.45	379.05	2
3.367		4238.8	830.2	2		6695.3	838.7	2			3.367		5183.8	684.3	2		5339.5	1400.3	2			3.367		4852.15	290.95	2		2706.7	912.1	2			3.367		5097.45	423.35	2		2034.55	397.35	2
3.383		4292.8	897.3	2		6788.15	765.35	2			3.383		5263.7	652.2	2		5344.6	1367.5	2			3.383		4709.8	294.9	2		2538.15	948.55	2			3.383		5151.45	397.85	2		2267.5	317.3	2
3.4		4299.45	886.95	2		6825.05	908.25	2			3.4		5196.75	631.85	2		5220.65	1362.15	2			3.4		4724.35	303.25	2		2630.3	861.7	2			3.4		5155.15	411.95	2		2162.6	324.9	2
3.417		4263.95	875.55	2		6746.75	897.75	2			3.417		5236.65	708.65	2		5336.45	1402.75	2			3.417		4806.85	329.25	2		2740.65	976.75	2			3.417		5139.8	392.1	2		2151.85	329.15	2
3.433		4259.4	887.2	2		6773.05	707.55	2			3.433		5289.8	712.7	2		5196.6	1260.4	2			3.433		4707.65	380.55	2		2676.35	961.35	2			3.433		5163.3	420	2		2196.85	356.95	2
3.45		4268.65	883.15	2		6821.5	758.2	2			3.45		5222.15	650.05	2		5299.9	1384.4	2			3.45		4831.35	291.85	2		2754.8	1128.3	2			3.45		5192.45	352.75	2		2216.5	336	2
3.467		4228.7	855.5	2		6727.4	885.8	2			3.467		5201.65	668.45	2		5333.05	1363.95	2			3.467		4795.7	208.9	2		2660.4	921	2			3.467		5151.15	397.85	2		2183.8	390.9	2
3.483		4248.95	889.25	2		6901.65	859.95	2			3.483		5170.15	692.55	2		5395.2	1445.2	2			3.483		4839.85	239.95	2		2704.95	1071.95	2			3.483		5145.5	406.7	2		2115.75	356.55	2
3.5		4227.25	853.65	2		6826.85	844.95	2			3.5		5200.45	688.65	2		5196.65	1255.65	2			3.5		4787.25	283.05	2		2669.15	972.55	2			3.5		5181.95	362.55	2		2226.95	393.05	2
3.517		4262.95	894.85	2		6774.6	897.9	2			3.517		5139.45	690.55	2		5327.75	1355.75	2			3.517		4867.1	191.2	2		2768.8	954.1	2			3.517		5137.65	449.45	2		2035.95	322.35	2
3.533		4251.75	870.15	2		6637.2	711.6	2			3.533		5194.9	656.6	2		5263.1	1411.5	2			3.533		4724.3	376	2		2713.8	1056.1	2			3.533		5123.75	464.35	2		2127.8	378.7	2
3.55		4264.95	867.95	2		6727.9	697.3	2			3.55		5177.75	606.45	2		5270.95	1208.25	2			3.55		4628.2	430.2	2		2579.9	1033.9	2			3.55		5150.85	395.45	2		2059.9	408	2
3.567		4226.15	837.25	2		6640.35	721.35	2			3.567		5187	661.5	2		5097.95	1036.35	2			3.567		4714.35	179.85	2		2719.65	1051.15	2			3.567		5165.65	398.95	2		2009.85	401.25	2
3.583		4261.65	888.75	2		6653.45	748.05	2			3.583		5245.35	696.15	2		4870.15	1000.05	2			3.583		4771.4	239.6	2		2851.85	1008.85	2			3.583		5136.4	390.9	2		2192.3	367.8	2
3.6		4252.2	875.6	2		6602.65	640.55	2			3.6		5195.9	625.4	2		5084.55	1229.65	2			3.6		4585.3	401.7	2		2934	1158.2	2			3.6		5131.3	354.2	2		2046.05	428.85	2
3.617		4229.7	851.6	2		6518.65	508.85	2			3.617		5166.85	718.45	2		4955.95	1249.95	2			3.617		4744.15	294.65	2		2710.05	1106.65	2			3.617		5116.1	409.1	2		2227.3	415.9	2
3.633		4178.4	795.9	2		6583	615.1	2			3.633		5159.05	720.95	2		4997.4	1120.2	2			3.633		4645	413.7	2		2695.25	1024.85	2			3.633		5159.35	357.35	2		2161.25	386.45	2
3.65		4205.9	827	2		6632.8	741.2	2			3.65		5218.35	660.65	2		4926.65	994.85	2			3.65		4714.45	297.55	2		2693.1	1064.5	2			3.65		5164.75	372.05	2		2103.5	385.6	2
3.667		4259.3	884.4	2		6756	740	2			3.667		5140.5	688	2		5081.3	1215.3	2			3.667		4656.75	273.65	2		2741.85	938.85	2			3.667		5123	419.1	2		2079.8	399.7	2
3.683		4234.85	845.95	2		6566.2	673.2	2			3.683		5225	707.5	2		5207.05	1407.45	2			3.683		4576.35	355.45	2		2522.85	868.85	2			3.683		5117.2	381.5	2		2150.5	364	2
3.7		4204	829	2		6564.5	654.8	2			3.7		5156.8	678.9	2		4979.35	1070.95	2			3.7		4684.85	317.45	2		2712.2	933.6	2			3.7		5108.95	401.45	2		2078.2	333.3	2
3.717		4235.5	866.4	2		6614.55	585.45	2			3.717		5142.4	696.2	2		5013.45	1122.55	2			3.717		4666.8	405.5	2		2774.75	999.65	2			3.717		5115.65	431.35	2		2148.3	358.4	2
3.733		4252.45	874.05	2		6665.8	696.3	2			3.733		5122.2	697.6	2		5108.45	1245.85	2			3.733		4651.25	407.95	2		2767.5	998.6	2			3.733		5090.45	421.65	2		2179.75	372.25	2
3.75		4194	831.7	2		6643.75	649.95	2			3.75		5120.45	621.75	2		5214.75	1293.15	2			3.75		4697.5	271.9	2		2702.95	839.05	2			3.75		5079.15	458.85	2		2134.1	384.7	2
3.767		4214.1	847.5	2		6601.3	616.4	2			3.767		5066.45	695.65	2		5085.65	1209.95	2			3.767		4600.55	388.45	2		2724.55	969.35	2			3.767		5144.6	412.1	2		2096.85	355.05	2
3.783		4197.4	831.5	2		6474.9	611.8	2			3.783		5180.2	658.6	2		5108	1294.4	2			3.783		4632.3	379.4	2		2703.35	949.35	2			3.783		5064.7	424.8	2		2178.25	358.05	2
3.8		4150.5	819.8	2		6494.6	656.9	2			3.8		5082.35	658.35	2		5023.25	1200.55	2			3.8		4551.85	457.95	2		2679.05	893.65	2			3.8		5050.35	455.25	2		2044.15	391.35	2
3.817		4193.7	834.1	2		6530.25	595.75	2			3.817		5101.9	716.4	2		5122.25	1247.05	2			3.817		4635.45	309.25	2		2648.95	951.25	2			3.817		5096.25	505.75	2		1981.35	395.95	2
3.833		4231.65	879.25	2		6603.35	709.65	2			3.833		5177.35	667.25	2		5140.4	1303.1	2			3.833		4581.6	383.4	2		2730.55	1039.15	2			3.833		5099.75	483.35	2		2222.8	327.3	2
3.85		4218.55	891.65	2		6514.75	658.85	2			3.85		5132.2	677.6	2		5189.15	1357.15	2			3.85		4571.7	380.2	2		2738.5	1046.7	2			3.85		5083.85	446.35	2		1979	432.7	2
3.867		4097.3	770.8	2		6648.35	625.45	2			3.867		5184.05	701.85	2		5018.6	1118.3	2			3.867		4534.45	338.35	2		2803.85	929.65	2			3.867		5079.15	449.95	2		2090.2	401.6	2
3.883		4149	784.2	2		6593.15	775.05	2			3.883		5123.75	700.75	2		5016.4	1157.1	2			3.883		4494.6	382.3	2		2788.1	1102.2	2			3.883		5066	462.3	2		2143.5	376.6	2
3.9		4208.45	866.35	2		6631.05	647.95	2			3.9		5128.45	660.25	2		5102.25	1315.95	2			3.9		4566.05	282.95	2		2766.8	1141.7	2			3.9		5087.25	405.55	2		2231.4	377.7	2
3.917		4202.85	851.45	2		6522.6	615.9	2			3.917		5073.1	611.6	2		5070	1216.6	2			3.917		4684.35	322.75	2		2601.75	959.95	2			3.917		5079.75	428.15	2		2127.6	412.7	2
3.933		4224.45	873.45	2		6733.7	799.1	2			3.933		5171.7	692.7	2		4854.05	1121.65	2			3.933		4453.95	414.55	2		2628.65	1002.45	2			3.933		5028.2	454.2	2		2186.6	337.8	2
3.95		4197.6	856.6	2		6650	833.4	2			3.95		5114.6	654.1	2		5123.6	1274.3	2			3.95		4677.3	377.3	2		2714.4	1062.1	2			3.95		5097.35	420.25	2		2206.6	337.9	2
3.967		4203.4	857.9	2		6724.15	808.85	2			3.967		5120.85	756.95	2		5039.2	1231.1	2			3.967		4635.6	306.2	2		2548.85	846.45	2			3.967		5110.75	433.85	2		2231.3	356.9	2
3.983		4190.4	842.5	2		6577.4	688.5	2			3.983		5117.05	618.45	2		5024.65	1351.15	2			3.983		4549.8	459.6	2		2720.35	1013.75	2			3.983		5107.45	410.45	2		2278.2	273.5	2
4		4200.6	864.2	2		6670.85	665.05	2			4		5101.85	602.25	2		5133.05	1402.55	2			4		4609.2	434.3	2		2560.55	915.55	2			4		5094.7	445.2	2		2176.05	366.05	2
4.017		4165.75	828.35	2		6655.5	719.6	2			4.017		5154.55	716.35	2		5007.4	1280.7	2			4.017		4602.3	304.3	2		2652.5	1066.1	2			4.017		5105.2	451.3	2		2171.65	320.25	2
4.033		4197.1	847.7	2		6662.4	700.2	2			4.033		5157	677.5	2		5084.05	1409.05	2			4.033		4634.55	297.95	2		2649.8	901.9	2			4.033		5146.8	404.6	2		2138.7	374.6	2
4.05		4171	843.8	2		6451.8	669.8	2			4.05		5149.85	702.75	2		4935.8	1138.9	2			4.05		4476	343.9	2		2544.3	972	2			4.05		5040.2	493.4	2		2215.2	320.7	2
4.067		4174.35	862.05	2		6656.15	798.95	2			4.067		5122.45	716.55	2		4836.35	1078.25	2			4.067		4541.95	430.15	2		2448.25	830.35	2			4.067		5057.5	374.1	2		2151.55	330.15	2
4.083		4142.3	828.5	2		6550.75	813.55	2			4.083		5105.35	750.85	2		4818.7	1125.3	2			4.083		4619.5	362.6	2		2528.1	839.7	2			4.083		5051.4	452.8	2		2242.65	262.45	2
4.1		4134.8	817.5	2		6669.4	646.3	2			4.1		5106.65	712.45	2		4863.45	1065.45	2			4.1		4537.3	326.2	2		2737.65	1173.15	2			4.1		5046.3	457.2	2		2086.7	326.3	2
4.117		4154.95	864.25	2		6465.25	668.25	2			4.117		5120.5	622.2	2		5021.45	1143.25	2			4.117		4504.9	431.7	2		2774.45	1183.65	2			4.117		5067.75	453.45	2		2232.6	381.1	2
4.133		4160.9	856.2	2		6461.2	633.8	2			4.133		5063.75	739.95	2		5108.45	1385.45	2			4.133		4567.05	418.85	2		2649.05	1038.65	2			4.133		5034.75	445.95	2		2126.45	422.15	2
4.15		4177.4	880.6	2		6583.6	648.9	2			4.15		5190.8	704.7	2		5227.9	1530.6	2			4.15		4588.1	479	2		2597.65	1032.05	2			4.15		5082.2	454.1	2		2138.5	369	2
4.167		4150.65	837.65	2		6499.95	697.45	2			4.167		5062.05	667.95	2		5028.95	1291.35	2			4.167		4533.85	356.55	2		2637.65	972.95	2			4.167		5024.15	455.85	2		2055.05	383.85	2
4.183		4129.4	830.2	2		6496.8	695.3	2			4.183		5139.7	733.8	2		4805.95	1016.45	2			4.183		4470.9	420.6	2		2774.6	989.8	2			4.183		5059.1	398.4	2		2171.2	344.9	2
4.2		4167.6	880.5	2		6497.4	749.3	2			4.2		5073	668.9	2		5080.75	1192.75	2			4.2		4565.6	322.8	2		2775.7	1103.7	2			4.2		5047.25	464.15	2		2164.25	381.65	2
4.217		4131.45	817.75	2		6505.05	671.65	2			4.217		5049.8	725.6	2		4896.1	1126.3	2			4.217		4643.65	310.95	2		2951.5	1145.3	2			4.217		5040.1	442.2	2		2256.5	368	2
4.233		4192.25	911.45	2		6628.55	860.65	2			4.233		5091.25	735.25	2		4996.1	1264.1	2			4.233		4498.95	306.45	2		2889.4	1180.7	2			4.233		5032.35	432.25	2		2179.65	431.25	2
4.25		4101.6	808.9	2		6540.15	712.55	2			4.25		5052.95	693.55	2		4828.6	985.1	2			4.25		4498.2	518.6	2		2871.8	1271.2	2			4.25		5070.6	455.9	2		2153.45	434.35	2
4.267		4139.25	876.85	2		6701.25	803.25	2			4.267		5074.8	705.3	2		4850.1	1176.3	2			4.267		4563.55	406.35	2		2731.55	1021.15	2			4.267		5035.4	496.8	2		2281.3	408.7	2
4.283		4195.1	889.8	2		6557.2	844.1	2			4.283		5018.9	633.1	2		5059.4	1379.3	2			4.283		4520.2	356.5	2		2798.9	1098.1	2			4.283		4965	482.5	2		2272.3	340.1	2
4.3		4164.25	879.45	2		6623.4	721.7	2			4.3		4975.9	691.4	2		4965.85	1217.15	2			4.3		4567.75	377.75	2		2830.9	1022.9	2			4.3		5005.55	496.85	2		2208.2	386	2
4.317		4123.15	837.55	2		6527.15	767.55	2			4.317		5034	718.5	2		4925.2	1229.4	2			4.317		4542.2	430.1	2		2769.15	1087.85	2			4.317		5012.4	466.3	2		2102	410.5	2
4.333		4089.35	799.15	2		6533.6	717.3	2			4.333		5050.85	713.35	2		5015.15	1323.45	2			4.333		4440.95	452.35	2		2694.75	1019.05	2			4.333		5010.2	475	2		2262.8	362	2
4.35		4088.45	822.45	2		6558.95	621.45	2			4.35		5023.45	689.45	2		4734.8	1115.7	2			4.35		4507.95	417.85	2		2739	1097.9	2			4.35		5032.7	490.8	2		2251.5	339.3	2
4.367		4101.3	837.5	2		6506.4	612.1	2			4.367		4995	678.7	2		4852.25	1160.25	2			4.367		4556.75	273.55	2		2707.4	1050.7	2			4.367		5007.8	530.9	2		2104.1	406.8	2
4.383		4153.9	848.7	2		6583.95	855.25	2			4.383		5082.25	702.15	2		4787.55	1132.75	2			4.383		4501.65	446.35	2		2647.85	950.65	2			4.383		5010	480.1	2		2168.9	372.6	2
4.4		4134.9	882.9	2		6561.4	774.9	2			4.4		5002.95	766.25	2		4863.4	1175.1	2			4.4		4607.85	388.65	2		2609.8	1052.7	2			4.4		5051.25	508.55	2		2100.55	364.25	2
4.417		4168.15	901.75	2		6583.4	797.2	2			4.417		5055.05	672.45	2		4719.6	1099.9	2			4.417		4499.7	451	2		2698.05	941.95	2			4.417		5029.5	429	2		2105.45	374.45	2
4.433		4110.8	842.7	2		6411.85	666.55	2			4.433		5027.8	629.2	2		4859.15	1134.85	2			4.433		4470.35	374.85	2		2553.9	953.3	2			4.433		5011.8	437.1	2		2238.9	329.6	2
4.45		4130.8	881.9	2		6503.1	673.7	2			4.45		5036.1	713.6	2		4909.65	1245.45	2			4.45		4492.5	472.9	2		2690.4	1006.3	2			4.45		5025.3	465.4	2		2197.95	317.85	2
4.467		4116.85	879.55	2		6613.4	821.7	2			4.467		5030.35	703.25	2		4892.05	1212.35	2			4.467		4549.05	449.45	2		2630.05	1114.15	2			4.467		5016.5	453	2		2136.45	371.25	2
4.483		4122.75	866.85	2		6339.15	500.45	2			4.483		5061.7	671.8	2		4892.9	1183	2			4.483		4609.65	314.55	2		2494.85	915.95	2			4.483		4959.9	495.7	2		2207.1	358.4	2
4.5		4067.7	829.4	2		6273.45	682.05	2			4.5		5047.7	702.4	2		4793	1128.6	2			4.5		4383.9	435.6	2		2597.7	1017.3	2			4.5		4954.75	477.15	2		2122.55	453.75	2
4.517		4079	846.6	2		6375.4	679.7	2			4.517		5045.75	703.05	2		4940.65	1148.75	2			4.517		4479.85	373.55	2		2632.9	1134	2			4.517		5010.25	450.45	2		2229.45	334.45	2
4.533		4084.25	857.15	2		6445.6	632.9	2			4.533		5036.8	744.5	2		4838	1031.5	2			4.533		4540.3	453.2	2		2793.35	1091.55	2			4.533		5002.35	507.15	2		2185.2	365.7	2
4.55		4109.9	869.3	2		6350.15	699.35	2			4.55		5002.45	709.25	2		4958.25	1239.15	2			4.55		4471.9	445.9	2		2633.45	1012.55	2			4.55		5018.6	462.8	2		2238.95	374.35	2
4.567		4138.85	894.65	2		6338.25	733.65	2			4.567		5029.6	632.7	2		4901.3	1162.2	2			4.567		4373.75	573.35	2		2906.15	1083.85	2			4.567		4953.75	540.85	2		2212.2	338.9	2
4.583		4097.85	844.35	2		6393.65	729.25	2			4.583		5001.75	669.55	2		4839.25	1056.75	2			4.583		4385.95	505.65	2		2677.35	1054.65	2			4.583		4949.45	493.25	2		2235.8	394.6	2
4.6		4109.55	882.25	2		6429.15	630.15	2			4.6		5058.2	722.6	2		4867.2	1053.3	2			4.6		4434.8	421.5	2		2678.95	1102.65	2			4.6		5024.25	454.95	2		2301.55	327.35	2
4.617		4038.25	787.65	2		6493.05	798.95	2			4.617		5078.05	694.85	2		5055.05	1236.15	2			4.617		4409.45	497.75	2		2566.15	840.45	2			4.617		4950.3	525.5	2		2148.1	252.7	2
4.633		4096.6	858.1	2		6357.7	624.5	2			4.633		4951.2	726.6	2		4941.05	1169.85	2			4.633		4413.4	490	2		2683.7	1130.1	2			4.633		4962.1	508.5	2		2194.9	300.2	2
4.65		4077.3	846.4	2		6402.65	541.55	2			4.65		5041.6	708.1	2		4773.05	1048.55	2			4.65		4327.85	499.35	2		2843.3	1222.2	2			4.65		4972.1	461.1	2		2078	345.3	2
4.667		4107.65	879.05	2		6428.25	723.85	2			4.667		4963.9	638.1	2		5045.05	1192.45	2			4.667		4482.9	456.4	2		2808.65	1048.15	2			4.667		4959.6	520.7	2		2133.85	308.95	2
4.683		4114.1	894.3	2		6323.15	656.05	2			4.683		4995.15	653.25	2		5018.9	1335.5	2			4.683		4349.2	557.9	2		2758.3	1167.5	2			4.683		5000.95	442.35	2		2270.95	294.25	2
4.7		4125.95	893.95	2		6304.2	550.7	2			4.7		4996.8	748	2		5164.7	1422.2	2			4.7		4555.45	373.15	2		2702.4	1150.6	2			4.7		5011.85	490.75	2		2154.15	342.45	2
4.717		4101.4	896.6	2		6288.55	530.65	2			4.717		5048.5	672.6	2		4954.2	1262.3	2			4.717		4522.85	390.85	2		2462.55	949.25	2			4.717		4983.85	454.75	2		2138.95	399.15	2
4.733		4076.95	849.35	2		6377.7	660.8	2			4.733		4971.85	686.95	2		4757.85	1018.15	2			4.733		4481.15	446.15	2		2790	1178.4	2			4.733		4952.9	529.1	2		2161.5	376.8	2
4.75		4074.55	848.85	2		6281.4	520.9	2			4.75		4980.9	701.8	2		4847.95	1205.05	2			4.75		4443	453.2	2		2879	1215.1	2			4.75		4960.15	504.35	2		2274.45	378.85	2
4.767		4109.2	901.6	2		6397.4	625.7	2			4.767		5030.65	717.75	2		4841.5	1133.2	2			4.767		4531.65	392.15	2		2698.05	1024.15	2			4.767		4982.35	508.55	2		2148.7	440.4	2
4.783		4096.8	854.5	2		6372.05	623.75	2			4.783		4974.7	668.5	2		4701.05	932.75	2			4.783		4311.15	588.05	2		2809.55	1121.65	2			4.783		4932.8	541	2		2101.1	452	2
4.8		4088.15	892.45	2		6410.55	612.35	2			4.8		5042.9	795.1	2		4759.65	1082.45	2			4.8		4400.45	537.65	2		2865.25	1260.15	2			4.8		4954.4	493	2		2164.25	405.65	2
4.817		4088.3	909.2	2		6221.1	470.9	2			4.817		4940.25	719.05	2		4799.1	1181.1	2			4.817		4454.25	371.15	2		2818.15	1272.95	2			4.817		4948.8	538	2		2164.65	506.35	2
4.833		4056.1	853.5	2		6140.8	492.1	2			4.833		5033.25	658.45	2		5004.4	1249.7	2			4.833		4392.3	535.3	2		2790.9	1187.5	2			4.833		4952.95	515.15	2		2278.6	400	2
4.85		4060.8	875	2		6352.9	545.3	2			4.85		4937.45	649.95	2		4866.55	1140.75	2			4.85		4458.2	413.2	2		2689.95	1055.15	2			4.85		5007.4	478.9	2		2196.7	404.4	2
4.867		4073.65	880.45	2		6383.25	534.35	2			4.867		4924.7	680.2	2		4938.85	1250.85	2			4.867		4377.5	511.8	2		2741	1202.9	2			4.867		5002.3	460.9	2		2153.45	440.25	2
4.883		4078.6	881.4	2		6278.4	482.6	2			4.883		4984.7	708.2	2		4838.85	1141.15	2			4.883		4414.15	486.35	2		2782.9	1125.4	2			4.883		5019.5	431.3	2		2201.8	396.5	2
4.9		4054.8	834.3	2		6343.1	615.9	2			4.9		4857.2	692	2		4915.2	1163.3	2			4.9		4442.6	434.4	2		2537.25	1016.15	2			4.9		4966.75	466.05	2		2217.3	385.3	2
4.917		4081.95	869.65	2		6188.3	352.4	2			4.917		4980.75	692.75	2		4885.8	1147.3	2			4.917		4272.55	489.05	2		2531.4	1003.1	2			4.917		4967.9	481.9	2		2205.4	324	2
4.933		4030.5	837.2	2		6375	824.6	2			4.933		4897.35	630.95	2		4896.2	1191.3	2			4.933		4432	446.1	2		2613.35	1036.25	2			4.933		4923.05	550.05	2		2191.45	455.35	2
4.95		4018.1	811.2	2		6367.95	651.95	2			4.95		4928.05	700.45	2		4933.45	1165.55	2			4.95		4326.1	517	2		2658.3	1101.4	2			4.95		4953.95	518.55	2		2139.15	492.35	2
4.967		4014.05	816.95	2		6412.4	501.7	2			4.967		4947.2	715.1	2		5067.75	1352.55	2			4.967		4383.1	555.9	2		2639.8	1129.5	2			4.967		4904.95	560.05	2		2159.45	375.75	2
4.983		4018	835.2	2		6331.85	605.85	2			4.983		4931.8	670.6	2		4991.6	1276.1	2			4.983		4436.45	431.45	2		2702	1128.3	2			4.983		4922.4	525.8	2		2262.6	407.8	2
5		4032	839.2	2		6160.85	575.55	2			5		4928.9	742.9	2		5164.95	1481.25	2			5		4353.2	501.7	2		2740.75	1110.05	2			5		4984.8	467.3	2		2241.25	428.95	2

## Sheet: Fig 3D
Figure 3D m-p Ratio
7R B/A ratio				4R B/A ratio				3R B/A ratio				0R B/A ratio
Mean	SEM	n		Mean	SEM	n		Mean	SEM	n		Mean	SEM	n
0.0647418	0.00373332	2		0.0930156	0.0561473	2		0.0736853	0.0340264	2		0.135781	0.049516	2
0.0742898	0.00872118	2		0.0764363	0.0299599	2		0.0655558	0.0321809	2		0.115374	0.0586261	2
0.0751359	0.0150276	2		0.0894615	0.0118957	2		0.0618818	0.0307958	2		0.116612	0.0490679	2
0.0724277	0.0049968	2		0.131862	0.00782522	2		0.0981796	0.0640802	2		0.196479	0.0238022	2
0.0989149	0.00548452	2		0.192878	0.0180773	2		0.142602	0.09	2		0.235599	0.034292	2
0.091086	0.0343303	2		0.238974	0.0669841	2		0.196372	0.143223	2		0.339972	0.00762781	2
0.152244	0.00913324	2		0.310713	0.0723532	2		0.212873	0.124679	2		0.369378	0.0115669	2
0.140539	0.00777578	2		0.385808	0.113665	2		0.301992	0.185308	2		0.388799	0.00659406	2
0.186675	0.00745109	2		0.463808	0.152483	2		0.300593	0.19346	2		0.429859	0.0287362	2
0.198307	0.0145239	2		0.520538	0.16738	2		0.368405	0.221667	2		0.405356	0.0357983	2
0.245404	0.0100471	2		0.598278	0.189904	2		0.36978	0.210825	2		0.396271	0.0559835	2
0.260498	0.0161133	2		0.65378	0.196797	2		0.449748	0.264475	2		0.427576	0.0437049	2
0.295924	0.0308319	2		0.71507	0.180187	2		0.438607	0.25485	2		0.436801	0.0694489	2
0.335297	0.00744927	2		0.737308	0.177803	2		0.487194	0.250641	2		0.404858	0.0792908	2
0.371476	0.00250092	2		0.809586	0.127833	2		0.484363	0.245245	2		0.426465	0.0785137	2
0.418093	0.00578815	2		0.845279	0.119747	2		0.488348	0.226313	2		0.377063	0.0908883	2
0.476477	0.00701199	2		0.909279	0.0959214	2		0.521933	0.26684	2		0.404153	0.074908	2
0.505311	0.00853555	2		0.959797	0.0627283	2		0.526524	0.239092	2		0.428336	0.0830145	2
0.55062	0.00448743	2		1.01272	0.0162771	2		0.504969	0.20625	2		0.406738	0.0826103	2
0.594056	0.036033	2		1.03655	0.0128428	2		0.546808	0.251967	2		0.403866	0.0711382	2
0.644322	0.0292471	2		1.07714	0.0100769	2		0.540099	0.179199	2		0.406851	0.0859598	2
0.672893	0.0229093	2		1.15049	0.0692638	2		0.54318	0.23448	2		0.405523	0.0680847	2
0.723943	0.0206171	2		1.16008	0.0769399	2		0.553194	0.196539	2		0.413805	0.0824795	2
0.732682	0.00737648	2		1.22941	0.11334	2		0.565183	0.199952	2		0.429272	0.0703963	2
0.810709	0.0242655	2		1.22272	0.084504	2		0.547275	0.178385	2		0.40591	0.0792352	2
0.833946	0.0158015	2		1.25944	0.120282	2		0.54141	0.155724	2		0.432199	0.0685379	2
0.899476	0.0268052	2		1.28987	0.164203	2		0.55996	0.174589	2		0.397119	0.0745329	2
0.910706	0.0289846	2		1.31101	0.196103	2		0.556963	0.154025	2		0.417571	0.0696218	2
0.991515	0.043618	2		1.32144	0.181647	2		0.537078	0.158564	2		0.412397	0.067914	2
1.03224	0.0907566	2		1.32555	0.216953	2		0.544239	0.148448	2		0.403071	0.0662812	2
1.08884	0.0457221	2		1.33533	0.236732	2		0.514689	0.140183	2		0.420439	0.0544127	2
1.14826	0.0392637	2		1.31679	0.218949	2		0.539866	0.106779	2		0.399112	0.0581078	2
1.19188	0.0609323	2		1.29387	0.199858	2		0.567343	0.111308	2		0.400903	0.0555549	2
1.18138	0.02834	2		1.31559	0.221929	2		0.569702	0.113009	2		0.433943	0.0535189	2
1.27123	0.0697468	2		1.28232	0.212771	2		0.550381	0.0923436	2		0.414038	0.0552072	2
1.33203	0.13393	2		1.25822	0.202482	2		0.561949	0.107767	2		0.392113	0.0534729	2
1.35394	0.0912345	2		1.24756	0.160077	2		0.537313	0.0885976	2		0.385906	0.0620045	2
1.38993	0.0678872	2		1.23446	0.162399	2		0.555163	0.0904153	2		0.405202	0.0508523	2
1.42194	0.0629797	2		1.25088	0.217089	2		0.568597	0.11284	2		0.389384	0.0580148	2
1.46864	0.0970238	2		1.24962	0.189899	2		0.591441	0.102268	2		0.384965	0.0686608	2
1.4788	0.106463	2		1.22364	0.17767	2		0.557359	0.103017	2		0.382672	0.0689463	2
1.49477	0.0725363	2		1.22712	0.200908	2		0.554693	0.127853	2		0.418741	0.0420938	2
1.55112	0.0979885	2		1.19594	0.169811	2		0.556582	0.102476	2		0.39703	0.0599135	2
1.55922	0.0892418	2		1.16985	0.162845	2		0.588595	0.141558	2		0.378433	0.0628164	2
1.55033	0.0495709	2		1.17365	0.168333	2		0.540997	0.109392	2		0.407858	0.0646248	2
1.58634	0.0729343	2		1.15947	0.178054	2		0.564301	0.129209	2		0.398986	0.0543364	2
1.61279	0.134953	2		1.18665	0.166553	2		0.547158	0.111744	2		0.407436	0.0592151	2
1.65591	0.0974109	2		1.15331	0.171791	2		0.560184	0.138411	2		0.407118	0.0527166	2
1.65938	0.126257	2		1.1811	0.185667	2		0.558846	0.0916958	2		0.414956	0.0551403	2
1.66343	0.0743943	2		1.21396	0.182617	2		0.562426	0.113861	2		0.422112	0.0466448	2
1.67819	0.0904778	2		1.17534	0.171936	2		0.576031	0.10556	2		0.408682	0.0544363	2
1.69026	0.127288	2		1.17833	0.188717	2		0.530404	0.110155	2		0.404491	0.0567571	2
1.65107	0.0714281	2		1.17573	0.196478	2		0.519529	0.11502	2		0.415012	0.0409736	2
1.7296	0.0999787	2		1.14782	0.135375	2		0.551322	0.114606	2		0.393556	0.0494181	2
1.70004	0.114842	2		1.13748	0.136133	2		0.536439	0.135041	2		0.410356	0.0480498	2
1.72141	0.0972712	2		1.13533	0.136908	2		0.544998	0.109592	2		0.421973	0.046234	2
1.72907	0.125963	2		1.14737	0.141444	2		0.572728	0.133892	2		0.41696	0.0436999	2
1.68311	0.130775	2		1.11751	0.115108	2		0.544027	0.142032	2		0.410093	0.0614158	2
1.74486	0.134879	2		1.12105	0.12946	2		0.588438	0.151236	2		0.419867	0.0463186	2
1.74744	0.170045	2		1.1336	0.135739	2		0.579023	0.162796	2		0.448323	0.0445566	2
1.73243	0.109103	2		1.15246	0.14864	2		0.565675	0.156196	2		0.419001	0.0595231	2
1.73681	0.086319	2		1.14508	0.170481	2		0.5477	0.14318	2		0.423061	0.0552888	2
1.72342	0.0600784	2		1.10559	0.146125	2		0.54926	0.125698	2		0.439475	0.0426111	2
1.70447	0.0359759	2		1.09308	0.142694	2		0.531704	0.089022	2		0.391253	0.0592382	2
1.7484	0.0559523	2		1.12926	0.155305	2		0.552393	0.14409	2		0.373347	0.0497166	2
1.70853	0.0111913	2		1.12243	0.142373	2		0.522838	0.127978	2		0.418446	0.0484853	2
1.70792	0.0280652	2		1.10529	0.161353	2		0.520643	0.113977	2		0.414643	0.0431144	2
1.66762	0.000261549	2		1.10888	0.130127	2		0.551138	0.137235	2		0.429298	0.0325807	2
1.7324	0.0183078	2		1.06885	0.10845	2		0.559471	0.128967	2		0.391076	0.0597317	2
1.70633	0.0403852	2		1.12421	0.154476	2		0.551408	0.111005	2		0.391464	0.057272	2
1.70134	0.0407195	2		1.08635	0.139132	2		0.54027	0.127064	2		0.400402	0.0446873	2
1.69406	0.0360293	2		1.10105	0.158914	2		0.540038	0.1514	2		0.418946	0.0475304	2
1.71034	0.0717901	2		1.10949	0.167485	2		0.530188	0.112087	2		0.407932	0.0542016	2
1.73062	0.041384	2		1.10399	0.15312	2		0.571819	0.147634	2		0.407856	0.0453542	2
1.71092	0.066029	2		1.08826	0.125428	2		0.558503	0.151146	2		0.402695	0.0585873	2
1.72794	0.0707939	2		1.08044	0.128339	2		0.556152	0.136692	2		0.399253	0.0630076	2
1.68748	0.0294239	2		1.09373	0.133211	2		0.568242	0.15349	2		0.382084	0.0644745	2
1.68625	0.0632333	2		1.10011	0.166124	2		0.558898	0.117374	2		0.407867	0.0572634	2
1.68706	0.0276505	2		1.09843	0.142929	2		0.494522	0.126519	2		0.392201	0.0513034	2
1.68591	0.0364652	2		1.11008	0.162967	2		0.578195	0.129264	2		0.408003	0.0357362	2
1.67004	0.0114538	2		1.11823	0.146036	2		0.498594	0.12451	2		0.432846	0.0509531	2
1.67526	0.0664844	2		1.10716	0.167625	2		0.534723	0.107583	2		0.425063	0.026155	2
1.65626	0.00885825	2		1.11414	0.147877	2		0.538564	0.140051	2		0.376217	0.0521242	2
1.63067	0.0122289	2		1.07691	0.150905	2		0.547931	0.12378	2		0.413474	0.0442591	2
1.63439	0.0241857	2		1.10571	0.178501	2		0.559735	0.140159	2		0.393776	0.0478055	2
1.68001	0.0288542	2		1.07809	0.149983	2		0.549981	0.131361	2		0.398757	0.0583682	2
1.67691	0.0494959	2		1.04563	0.124856	2		0.557339	0.117193	2		0.387718	0.0580412	2
1.67973	0.00407797	2		1.06441	0.124608	2		0.543019	0.122084	2		0.403144	0.0489406	2
1.67697	0.00447918	2		1.03326	0.118525	2		0.56582	0.145302	2		0.418538	0.0335509	2
1.65385	0.0259825	2		1.04676	0.12674	2		0.516812	0.116101	2		0.387469	0.0589584	2
1.64729	0.0445945	2		1.04949	0.132739	2		0.556607	0.123489	2		0.387646	0.0452309	2
1.66397	0.00888551	2		1.01756	0.120188	2		0.524909	0.141414	2		0.418456	0.042218	2
1.65495	0.00580388	2		1.04876	0.132366	2		0.548149	0.135216	2		0.376401	0.0533229	2
1.66586	0.0256523	2		1.01187	0.083935	2		0.534759	0.114391	2		0.398605	0.0484922	2
1.65676	0.0221653	2		1.00495	0.0838611	2		0.572122	0.140562	2		0.390548	0.0476391	2
1.60903	0.0116063	2		1.04251	0.10966	2		0.562237	0.110763	2		0.410769	0.0501026	2
1.65137	0.0013143	2		1.05276	0.15603	2		0.535867	0.118597	2		0.420882	0.0417624	2
1.60355	0.0252356	2		1.03898	0.105269	2		0.529763	0.113134	2		0.409835	0.037726	2
1.61399	0.0016006	2		1.04137	0.112455	2		0.571104	0.111511	2		0.377966	0.0290713	2
1.6485	0.00563145	2		1.04381	0.12165	2		0.533855	0.107241	2		0.390949	0.0296202	2
1.65112	0.00872172	2		1.03944	0.10519	2		0.565723	0.135469	2		0.419476	0.0279672	2
1.64888	0.0244676	2		1.0286	0.103451	2		0.549961	0.116218	2		0.38252	0.055638	2
1.63244	0.0165237	2		1.04151	0.130736	2		0.585284	0.160941	2		0.407121	0.0410102	2
1.64644	0.0133895	2		1.0318	0.102093	2		0.536877	0.140216	2		0.413638	0.0542518	2
1.66377	0.0121642	2		1.01479	0.0933858	2		0.544054	0.145494	2		0.422553	0.0406579	2
1.68847	0.00102666	2		1.04992	0.108424	2		0.548201	0.13545	2		0.431216	0.038206	2
1.6505	0.0203582	2		1.04647	0.0898545	2		0.554726	0.11932	2		0.405816	0.0449905	2
1.66701	0.0359752	2		1.06122	0.125404	2		0.524193	0.127008	2		0.390087	0.0524795	2
1.7453	0.0663302	2		1.02019	0.0951037	2		0.542541	0.164581	2		0.389971	0.0461903	2
1.65364	0.0503247	2		1.07496	0.161085	2		0.554365	0.147485	2		0.414496	0.0509294	2
1.66609	0.0306319	2		1.05785	0.133869	2		0.585077	0.183982	2		0.416271	0.0435177	2
1.66116	0.00941649	2		1.04558	0.0952164	2		0.561276	0.163848	2		0.41898	0.0579106	2
1.70304	0.0186956	2		1.0434	0.129506	2		0.539477	0.119136	2		0.42807	0.04253	2
1.67275	0.0387975	2		1.0595	0.149526	2		0.532031	0.144478	2		0.421138	0.0369337	2
1.66687	0.0439407	2		1.09466	0.186239	2		0.530344	0.149876	2		0.405548	0.0438935	2
1.63628	0.0121688	2		1.07258	0.151762	2		0.524156	0.166294	2		0.414251	0.0423603	2
1.68852	0.00673228	2		1.07757	0.166141	2		0.518891	0.156774	2		0.386818	0.05319	2
1.61568	0.00506702	2		1.03485	0.113984	2		0.554633	0.126488	2		0.400888	0.0448388	2
1.59604	0.0427516	2		1.04845	0.149749	2		0.521476	0.164743	2		0.409666	0.0407781	2
1.64232	0.0389171	2		1.04283	0.131206	2		0.518312	0.0983539	2		0.408307	0.0410339	2
1.60816	0.0551557	2		1.06545	0.128624	2		0.51483	0.114145	2		0.406462	0.0303274	2
1.63067	0.00789626	2		1.06496	0.137886	2		0.538853	0.128862	2		0.408841	0.0293387	2
1.66988	0.0559774	2		1.01086	0.134025	2		0.525571	0.13345	2		0.401506	0.0405764	2
1.65715	0.0119252	2		1.04596	0.132967	2		0.538695	0.116655	2		0.395356	0.0430576	2
1.65669	0.0484728	2		1.04426	0.128449	2		0.552176	0.131624	2		0.417539	0.0349615	2
1.61743	0.0569325	2		1.05732	0.101593	2		0.535302	0.107156	2		0.373397	0.0561635	2
1.65938	0.0448581	2		1.04192	0.096989	2		0.52548	0.101183	2		0.402149	0.0365975	2
1.67295	0.0203013	2		1.04675	0.141435	2		0.525467	0.120273	2		0.392796	0.0365356	2
1.62407	0.064776	2		1.06826	0.142698	2		0.541705	0.143383	2		0.399588	0.0378276	2
1.62502	0.0550795	2		1.01619	0.0902521	2		0.549257	0.155225	2		0.392789	0.0463613	2
1.64582	0.0854269	2		1.05295	0.123914	2		0.559791	0.125779	2		0.410454	0.0177475	2
1.6265	0.0623289	2		1.05439	0.145926	2		0.537863	0.138699	2		0.409984	0.0417321	2
1.62177	0.0600354	2		1.04325	0.117195	2		0.544013	0.156394	2		0.400441	0.0318439	2
1.62187	0.0856907	2		1.04391	0.1385	2		0.526587	0.144014	2		0.396937	0.0364351	2
1.65908	0.0565752	2		1.04814	0.12592	2		0.527715	0.135442	2		0.418248	0.0353635	2
1.6023	0.0868737	2		1.05002	0.129478	2		0.515826	0.146658	2		0.414841	0.0373301	2
1.64492	0.0870848	2		1.05188	0.133539	2		0.540825	0.147703	2		0.427959	0.0331662	2
1.63288	0.0828002	2		1.07611	0.146164	2		0.515542	0.142737	2		0.404494	0.0450807	2
1.67132	0.0256342	2		1.05689	0.141286	2		0.541543	0.148625	2		0.398473	0.0506448	2
1.66514	0.0585461	2		1.04198	0.126817	2		0.522798	0.115827	2		0.406114	0.0458573	2
1.62823	0.0790884	2		1.05458	0.110702	2		0.543373	0.127505	2		0.397479	0.0503561	2
1.62136	0.0731748	2		1.0587	0.150169	2		0.500107	0.103244	2		0.40965	0.0486572	2
1.61923	0.0912706	2		1.08318	0.153225	2		0.510453	0.161705	2		0.395111	0.0538243	2
1.63541	0.0536838	2		1.04571	0.149826	2		0.542772	0.173563	2		0.423398	0.0537985	2
1.63768	0.070935	2		1.03728	0.107963	2		0.568686	0.148856	2		0.397529	0.0747217	2
1.67234	0.0605192	2		1.01849	0.126647	2		0.57693	0.145828	2		0.408862	0.0596813	2
1.64266	0.107189	2		1.05637	0.168485	2		0.555529	0.153952	2		0.392602	0.0656234	2
1.64436	0.0831817	2		1.04612	0.174992	2		0.529721	0.139334	2		0.406667	0.065412	2
1.65779	0.0885693	2		1.00951	0.128597	2		0.540834	0.148547	2		0.401032	0.0488787	2
1.6385	0.0886475	2		0.986684	0.0749378	2		0.541649	0.152074	2		0.416585	0.0393723	2
1.62828	0.0968255	2		1.00143	0.10391	2		0.519177	0.114089	2		0.417933	0.039865	2
1.62613	0.0901414	2		1.03685	0.151863	2		0.497531	0.129838	2		0.406422	0.0551742	2
1.61488	0.0816119	2		1.00857	0.126933	2		0.525314	0.139905	2		0.433595	0.0187588	2
1.66704	0.112814	2		0.999643	0.109643	2		0.527675	0.0812811	2		0.411132	0.0362501	2
1.64925	0.0781977	2		0.989665	0.108215	2		0.499403	0.0936875	2		0.37932	0.0480823	2
1.65752	0.0750181	2		1.00321	0.122581	2		0.519308	0.127161	2		0.430291	0.013238	2
1.61541	0.107772	2		0.986171	0.0884095	2		0.571023	0.151201	2		0.406008	0.0343478	2
1.64299	0.0865768	2		0.977132	0.121568	2		0.539962	0.110969	2		0.417264	0.030824	2
1.65466	0.108563	2		1.02407	0.145193	2		0.500478	0.145425	2		0.399645	0.0620758	2
1.62982	0.0798078	2		0.976594	0.0817046	2		0.527724	0.112159	2		0.418437	0.0278661	2
1.62886	0.0705756	2		0.968173	0.111255	2		0.547481	0.150582	2		0.420733	0.0255622	2
1.59953	0.0877221	2		0.976162	0.102252	2		0.51743	0.139519	2		0.414093	0.0402965	2
1.62151	0.0804893	2		0.984063	0.111372	2		0.52891	0.0894135	2		0.432654	0.0280708	2
1.66586	0.0807358	2		0.982839	0.117501	2		0.527568	0.115181	2		0.42045	0.0224744	2
1.63864	0.132439	2		0.992121	0.136834	2		0.529585	0.115547	2		0.408671	0.0318995	2
1.65545	0.0939917	2		0.941169	0.0871929	2		0.52046	0.116894	2		0.422613	0.0279231	2
1.62279	0.0914785	2		0.946901	0.0713852	2		0.534478	0.130283	2		0.404127	0.0329598	2
1.59758	0.121806	2		0.940541	0.104453	2		0.550416	0.139155	2		0.408171	0.0358306	2
1.58414	0.118745	2		0.970262	0.105645	2		0.581188	0.131552	2		0.429218	0.0358131	2
1.64542	0.0681868	2		0.956295	0.123476	2		0.615323	0.136599	2		0.436417	0.0363193	2
1.621	0.158427	2		0.968911	0.0700114	2		0.538184	0.106784	2		0.413592	0.0461662	2
1.56923	0.114126	2		0.989868	0.103929	2		0.552664	0.126474	2		0.424977	0.0213841	2
1.56917	0.142008	2		1.00224	0.110217	2		0.521056	0.145592	2		0.413752	0.0349518	2
1.59959	0.0908166	2		1.01476	0.137889	2		0.546116	0.111614	2		0.397987	0.0381147	2
1.603	0.134937	2		0.986869	0.116429	2		0.538358	0.13237	2		0.408408	0.0389076	2
1.58995	0.11712	2		0.978505	0.0871986	2		0.516341	0.102502	2		0.388118	0.0394791	2
1.55484	0.121866	2		0.980464	0.100988	2		0.529803	0.154606	2		0.41456	0.0270536	2
1.55662	0.114181	2		0.995082	0.116673	2		0.51342	0.123839	2		0.436034	0.029936	2
1.56436	0.112999	2		0.957713	0.119435	2		0.546844	0.145005	2		0.408366	0.0305076	2
1.61269	0.13347	2		0.979744	0.112194	2		0.526664	0.131225	2		0.430036	0.0305973	2
1.55447	0.164245	2		0.951803	0.103503	2		0.557022	0.126477	2		0.419273	0.0279845	2
1.59645	0.128784	2		0.981408	0.109781	2		0.571986	0.145265	2		0.404467	0.041841	2
1.56439	0.150592	2		0.976636	0.108395	2		0.54447	0.127295	2		0.400535	0.0467588	2
1.63064	0.149208	2		0.97172	0.119986	2		0.550996	0.147471	2		0.429506	0.029969	2
1.61797	0.121397	2		1.0049	0.130035	2		0.556097	0.113259	2		0.429732	0.0314581	2
1.60185	0.121999	2		1.01333	0.151695	2		0.560282	0.101066	2		0.426723	0.0277625	2
1.62323	0.103617	2		0.978517	0.111714	2		0.550546	0.141626	2		0.40035	0.0309172	2
1.61161	0.11435	2		1.03482	0.170136	2		0.523909	0.149823	2		0.406704	0.036385	2
1.62417	0.121992	2		0.958045	0.10965	2		0.570696	0.169546	2		0.43105	0.021116	2
1.60711	0.144711	2		0.989088	0.110069	2		0.56532	0.165178	2		0.423118	0.0428251	2
1.60937	0.121566	2		1.00143	0.147863	2		0.524622	0.166588	2		0.428154	0.0309651	2
1.60861	0.164587	2		0.971829	0.0997303	2		0.556636	0.159282	2		0.412138	0.0371252	2
1.59615	0.128294	2		0.98587	0.119445	2		0.560318	0.157792	2		0.413789	0.0401468	2
1.58122	0.113387	2		0.981608	0.121745	2		0.582218	0.177108	2		0.447638	0.0318448	2
1.65992	0.12982	2		0.982111	0.133347	2		0.531236	0.136473	2		0.435923	0.0367705	2
1.61856	0.142291	2		0.957939	0.106284	2		0.559792	0.174037	2		0.395005	0.0380309	2
1.65545	0.107974	2		0.964381	0.113554	2		0.571383	0.104373	2		0.416377	0.0419423	2
1.63627	0.11119	2		0.974005	0.111049	2		0.563231	0.172252	2		0.413938	0.0305582	2
1.61727	0.0988984	2		0.974622	0.0873231	2		0.56057	0.167227	2		0.409157	0.0410896	2
1.59806	0.108292	2		0.944014	0.106387	2		0.548219	0.129792	2		0.431235	0.0318734	2
1.62014	0.129079	2		0.979976	0.121521	2		0.594685	0.154093	2		0.407374	0.0358628	2
1.59548	0.115259	2		0.9839	0.15225	2		0.560747	0.152764	2		0.427846	0.0375119	2
1.60224	0.115947	2		1.01201	0.136537	2		0.548536	0.155087	2		0.395384	0.0451136	2
1.61456	0.159196	2		0.998509	0.136078	2		0.528369	0.168316	2		0.438023	0.0277655	2
1.61247	0.121394	2		0.987325	0.142071	2		0.547301	0.147265	2		0.41713	0.0296913	2
1.60679	0.119391	2		1.00114	0.132392	2		0.558859	0.16492	2		0.416201	0.0322887	2
1.62609	0.172587	2		0.967848	0.107871	2		0.555634	0.159295	2		0.422647	0.0347526	2
1.63112	0.159845	2		0.997343	0.140953	2		0.558122	0.199822	2		0.424433	0.0358754	2
1.6146	0.117172	2		1.00821	0.132652	2		0.54742	0.168202	2		0.420592	0.0434015	2
1.65443	0.143859	2		1.02447	0.142299	2		0.549261	0.194253	2		0.408258	0.0370249	2
1.64154	0.131611	2		0.984561	0.111074	2		0.547456	0.170785	2		0.426532	0.0460079	2
1.61618	0.128629	2		1.0196	0.126796	2		0.562047	0.173951	2		0.393805	0.028292	2
1.59354	0.158763	2		0.994676	0.145988	2		0.560191	0.178962	2		0.411967	0.0365754	2
1.61093	0.164341	2		1.00445	0.115707	2		0.541343	0.173073	2		0.396168	0.0487949	2
1.60024	0.14634	2		0.97318	0.0756876	2		0.56921	0.201253	2		0.385379	0.0479132	2
1.59396	0.156882	2		0.91936	0.0686393	2		0.588563	0.181882	2		0.423822	0.0393521	2
1.58912	0.176588	2		0.964051	0.120621	2		0.62252	0.198053	2		0.394852	0.0563198	2
1.58103	0.198018	2		0.943792	0.110683	2		0.558909	0.198553	2		0.431611	0.0467794	2
1.6057	0.158644	2		0.957013	0.0833955	2		0.565079	0.170307	2		0.415706	0.04611	2
1.6044	0.139243	2		0.934951	0.0722786	2		0.55922	0.1905	2		0.403998	0.0455574	2
1.61994	0.162627	2		0.974294	0.106018	2		0.578942	0.16759	2		0.402283	0.0451109	2
1.58188	0.157029	2		0.978022	0.136938	2		0.53979	0.14793	2		0.417265	0.0400245	2
1.59271	0.158315	2		0.954797	0.0819769	2		0.568035	0.16079	2		0.404145	0.0334816	2
1.60038	0.189145	2		0.963022	0.087915	2		0.580342	0.163779	2		0.417004	0.0348979	2
1.60152	0.165437	2		0.982412	0.109429	2		0.580638	0.163769	2		0.425063	0.0379185	2
1.61696	0.165684	2		1.00253	0.130814	2		0.566963	0.145799	2		0.416727	0.0380939	2
1.60185	0.175878	2		0.989657	0.102931	2		0.578557	0.161852	2		0.404651	0.0366002	2
1.57555	0.166358	2		0.969972	0.126554	2		0.570629	0.158205	2		0.42716	0.0348673	2
1.59577	0.156924	2		0.974118	0.110036	2		0.574627	0.138515	2		0.401028	0.0413401	2
1.59188	0.174555	2		0.98917	0.105531	2		0.560258	0.167835	2		0.384866	0.0395004	2
1.59446	0.163595	2		0.976647	0.125823	2		0.581071	0.178184	2		0.433677	0.023076	2
1.58197	0.178193	2		0.993501	0.133267	2		0.58401	0.180384	2		0.384765	0.0513312	2
1.65238	0.158203	2		0.95641	0.0862345	2		0.606422	0.15977	2		0.407721	0.0429493	2
1.61135	0.117756	2		0.966236	0.0936834	2		0.603832	0.193867	2		0.419827	0.0360272	2
1.61228	0.17794	2		0.978067	0.130679	2		0.592732	0.213311	2		0.435475	0.0395289	2
1.58741	0.175048	2		0.984791	0.12109	2		0.543876	0.167454	2		0.41494	0.0462707	2
1.62431	0.146683	2		0.926145	0.092834	2		0.57421	0.171625	2		0.432326	0.0281288	2
1.6108	0.130173	2		0.986023	0.123048	2		0.565699	0.181443	2		0.430352	0.0308091	2
1.62824	0.139892	2		0.969707	0.0970699	2		0.540138	0.146919	2		0.433787	0.0330091	2
1.60133	0.157651	2		0.964113	0.147525	2		0.58133	0.164089	2		0.444622	0.017818	2
1.62425	0.175838	2		0.987423	0.158349	2		0.541623	0.147601	2		0.42408	0.034791	2
1.62768	0.150919	2		0.955375	0.115688	2		0.56349	0.194388	2		0.423141	0.0253244	2
1.61976	0.160318	2		0.966642	0.146238	2		0.561559	0.158502	2		0.412366	0.0403662	2
1.57896	0.158841	2		0.945871	0.0920783	2		0.555023	0.174515	2		0.43747	0.0208032	2
1.62428	0.144037	2		0.932959	0.0799888	2		0.526438	0.132961	2		0.422903	0.0339974	2
1.60641	0.124897	2		0.931586	0.0834063	2		0.536303	0.139677	2		0.442867	0.0122579	2
1.64645	0.169215	2		0.941595	0.0772739	2		0.587815	0.216297	2		0.411026	0.0274218	2
1.59144	0.170194	2		0.967816	0.105668	2		0.59617	0.205617	2		0.437323	0.0360704	2
1.58877	0.174602	2		0.989986	0.128938	2		0.563921	0.175705	2		0.418209	0.0468047	2
1.61503	0.185113	2		0.985275	0.161107	2		0.548667	0.167659	2		0.417629	0.0352907	2
1.59715	0.154289	2		0.976807	0.126212	2		0.568407	0.169896	2		0.40544	0.0396147	2
1.6043	0.15416	2		0.925698	0.0656016	2		0.605119	0.164461	2		0.426443	0.0345921	2
1.59211	0.156577	2		0.987698	0.104884	2		0.593836	0.199757	2		0.425442	0.0364914	2
1.60523	0.155158	2		0.957279	0.0854881	2		0.621872	0.204996	2		0.444727	0.0339957	2
1.61274	0.145336	2		0.965593	0.108843	2		0.627273	0.219712	2		0.428931	0.0488528	2
1.62342	0.146438	2		0.946676	0.065018	2		0.614013	0.211812	2		0.42039	0.047863	2
1.65198	0.155894	2		0.941697	0.100915	2		0.583258	0.171827	2		0.449419	0.036825	2
1.59201	0.136461	2		0.989142	0.150048	2		0.603794	0.195312	2		0.455307	0.0242527	2
1.62648	0.170189	2		0.98297	0.108026	2		0.605379	0.173875	2		0.437809	0.0336575	2
1.61174	0.141242	2		0.963151	0.106749	2		0.592282	0.183415	2		0.415336	0.0432585	2
1.62551	0.142254	2		0.975381	0.124269	2		0.589539	0.169417	2		0.448823	0.0297012	2
1.64005	0.177919	2		0.929567	0.0945187	2		0.590088	0.188851	2		0.445032	0.0240186	2
1.62365	0.18231	2		0.957538	0.102176	2		0.582408	0.195618	2		0.416231	0.0371067	2
1.61015	0.123086	2		0.928952	0.094542	2		0.572889	0.154375	2		0.429734	0.0331906	2
1.62071	0.158656	2		0.958619	0.0880596	2		0.551032	0.181981	2		0.412771	0.0305538	2
1.6136	0.157831	2		0.920994	0.0950688	2		0.584497	0.150753	2		0.415291	0.0390278	2
1.59348	0.164512	2		0.953137	0.106435	2		0.557335	0.166516	2		0.44437	0.0270094	2
1.613	0.181273	2		0.959106	0.111402	2		0.581732	0.16276	2		0.435252	0.0229406	2
1.63857	0.150481	2		0.957528	0.107143	2		0.559416	0.189648	2		0.422648	0.0358398	2
1.58202	0.211248	2		0.952409	0.10731	2		0.530133	0.162528	2		0.442184	0.028067	2
1.57349	0.153158	2		0.936564	0.0932618	2		0.575176	0.174902	2		0.423495	0.0507956	2
1.5972	0.164866	2		0.966207	0.0930403	2		0.57058	0.205556	2		0.442553	0.0269651	2
1.61685	0.184363	2		0.951038	0.0642177	2		0.597187	0.180804	2		0.433883	0.0291176	2
1.57977	0.163981	2		0.975656	0.10938	2		0.571998	0.16939	2		0.443019	0.0337386	2
1.56627	0.161304	2		0.960625	0.11023	2		0.643018	0.163515	2		0.444399	0.0198934	2
1.59113	0.149888	2		0.956367	0.0832538	2		0.590565	0.172376	2		0.448233	0.0350562	2
1.60552	0.191339	2		0.951918	0.0722478	2		0.585734	0.192965	2		0.455927	0.0238694	2
1.63136	0.120347	2		0.98052	0.109262	2		0.567684	0.12652	2		0.433398	0.00503994	2
1.58977	0.180559	2		0.984478	0.0918017	2		0.586885	0.190902	2		0.440762	0.0153307	2
1.61222	0.201857	2		0.935986	0.076519	2		0.632818	0.209389	2		0.415061	0.0309558	2
1.60053	0.166299	2		1.00203	0.111416	2		0.609034	0.171806	2		0.428429	0.0173133	2
1.57679	0.18329	2		0.986665	0.138326	2		0.609808	0.190216	2		0.452439	0.0188191	2
1.57286	0.207311	2		1.01371	0.132874	2		0.576402	0.205362	2		0.427217	0.0264959	2
1.58052	0.216132	2		0.965141	0.121451	2		0.530292	0.164053	2		0.42541	0.0412722	2
1.60001	0.171247	2		0.946737	0.0739743	2		0.602398	0.202993	2		0.433228	0.0297965	2
1.58372	0.202094	2		0.958243	0.106919	2		0.626609	0.20957	2		0.455488	0.0300646	2
1.60049	0.198895	2		0.949592	0.0897758	2		0.580167	0.175794	2		0.426686	0.0448401	2
1.59291	0.179993	2		0.936711	0.0616236	2		0.627888	0.174529	2		0.420959	0.0454633	2
1.61221	0.202162	2		0.933187	0.0675153	2		0.625475	0.209947	2		0.432974	0.0387926	2
1.57391	0.234841	2		0.956903	0.0998004	2		0.613132	0.234694	2		0.431384	0.0554206	2
1.5574	0.20639	2		0.978533	0.120277	2		0.611541	0.19583	2		0.456589	0.0332708	2
1.61027	0.21269	2		0.972071	0.10308	2		0.586473	0.18232	2		0.434945	0.039163	2
1.61401	0.217668	2		0.986613	0.117724	2		0.602261	0.204378	2		0.425999	0.0487589	2
1.58794	0.224834	2		0.957543	0.0928878	2		0.609761	0.187769	2		0.435074	0.0416082	2
1.60086	0.177494	2		0.998078	0.097305	2		0.55405	0.174553	2		0.44305	0.0360027	2
1.56883	0.247905	2		0.967617	0.0957654	2		0.573115	0.169177	2		0.44176	0.0223667	2
1.6086	0.129542	2		0.984771	0.116381	2		0.571915	0.176245	2		0.440303	0.0432986	2
1.61801	0.1644	2		0.987427	0.0961651	2		0.592516	0.183784	2		0.426072	0.0547866	2
1.63998	0.208787	2		1.00586	0.128003	2		0.578897	0.184274	2		0.437212	0.0266851	2
1.61428	0.184767	2		0.995345	0.123408	2		0.589891	0.196957	2		0.456007	0.034136	2
1.56612	0.183219	2		1.0259	0.145896	2		0.608286	0.184892	2		0.445465	0.0442915	2
