# Supplementary material for: Distinct architectural requirements for the parS centromeric sequence of the pSM19035 plasmid partition machinery
Source: eLife. 2022 Sep 5;11:e79480. doi: 10.7554/eLife.79480 (PMC9499535; doi:10.7554/eLife.79480)
Supplement: Figure 4—source data 1. [file elife-79480-fig4-data1.xlsx]

## Sheet: Fig 4A
Figure 4A-a											Figure 4A-b											Figure 4A-c											Figure 4A-d
		ParA-GFP				ParB-7R							ParA-GFP				ParB-7R							ParA-GFP				ParB-7R							ParA-GFP				ParB-7R
Time (min)		Mean	SEM	n		Mean	SEM	n			Time (min)		Mean	SEM	n		Mean	SEM	n			Time (min)		Mean	SEM	n		Mean	SEM	n			Time (min)		Mean	SEM	n		Mean	SEM	n
0		18944.9	3029.22	4		22590.8	3105.26	4			0		33861.1	1337.82	4		25679.6	1650.78	4			0		31512.1	827.728	4		19447.6	821.789	4			0		33401	734.265	4		18874.1	861.996	4
0.017		18451.6	2974.35	4		21444.7	2731.86	4			0.017		32369.5	1153.18	4		23371.1	921.378	4			0.017		30189.7	1210.36	4		17745.9	407.285	4			0.017		32498.3	1250.54	4		18149.9	1060.83	4
0.033		17862.3	2638.8	4		20769.1	2462.88	4			0.033		32372.7	1869.96	4		22809.9	657.173	4			0.033		29678.7	1332.37	4		18001.4	670.721	4			0.033		31600.4	1207.34	4		17555.9	872.631	4
0.05		17442.2	2600.7	4		20666.4	2695.71	4			0.05		32092.9	1803.37	4		22755.3	1143.01	4			0.05		30047.2	1304.75	4		17109.4	551.099	4			0.05		31092.7	1061.47	4		16290.4	1018.05	4
0.067		17314.5	2422.02	4		20183	2337.72	4			0.067		29992.3	1307.94	4		21389.5	1213.9	4			0.067		30117.2	1308.56	4		17454.6	837.711	4			0.067		30585.6	964.363	4		14837.7	1084.02	4
0.083		17108.3	2413.61	4		20139.4	2361.08	4			0.083		29708.5	1267.04	4		20376.1	1448.04	4			0.083		29666.8	1133.44	4		16833.4	1246.7	4			0.083		29921	944.635	4		12842.6	1182.31	4
0.1		16779.6	2430.04	4		19528.1	2258.01	4			0.1		30326.1	2508.16	4		20508.8	1470.53	4			0.1		29207	1324.21	4		16303.1	1184.65	4			0.1		29637.8	849.996	4		11139.8	1080.71	4
0.117		16313.3	2299.96	4		18672.8	2019.7	4			0.117		29802.2	2119.18	4		19842.4	1537.64	4			0.117		28779.6	1289.32	4		15643.8	1579.64	4			0.117		29117.7	784.253	4		10192.8	1292.88	4
0.133		16279.2	2186.17	4		19072.8	2129.76	4			0.133		30063.2	2627.8	4		19039.1	2056.69	4			0.133		29545.9	1271.91	4		15060.7	1615.03	4			0.133		28985.5	861.436	4		9706.7	973.201	4
0.15		15892.1	2231.87	4		18616	2136.82	4			0.15		30722.1	2403.01	4		19030	1956.83	4			0.15		28607.1	1337.86	4		13718.5	1080.58	4			0.15		28620.5	792.507	4		9392.23	918.036	4
0.167		15591.4	2143.74	4		18224	2103.97	4			0.167		28996.7	1842.93	4		19290.6	1990.17	4			0.167		28756.9	1194.79	4		13193.2	1207.67	4			0.167		28327.4	724.986	4		9154.59	1070.56	4
0.183		15287.6	1993.07	4		17817.8	1940.15	4			0.183		28899.1	2285.76	4		18837.6	1933.67	4			0.183		27992.2	1312.93	4		11501	647.401	4			0.183		27758.9	609.05	4		8183.77	1116.18	4
0.2		15156.6	1879.82	4		17499.7	1730.89	4			0.2		28987.7	1740.4	4		18054.9	2495.73	4			0.2		28470.5	1416.58	4		10529.4	429.744	4			0.2		27741.5	723.09	4		7941.93	970.817	4
0.217		14929.4	1993.46	4		17034.3	1652.33	4			0.217		28512.7	1748.19	4		17754.2	2114.78	4			0.217		27670.3	1275.68	4		10477.2	575.334	4			0.217		27524.5	613.927	4		7895.32	697.8	4
0.233		14756.1	1868.25	4		16988	1693.58	4			0.233		28057.1	2231.06	4		17453	2161.35	4			0.233		28191.7	1084.27	4		10087.5	493.746	4			0.233		27164	619.877	4		7865	749.174	4
0.25		14582.4	1850.84	4		16889.9	1675.8	4			0.25		28241.1	2380.39	4		16719.6	2103.47	4			0.25		28423.3	1243.78	4		9625.48	612.136	4			0.25		26874.6	736.652	4		7508.04	813.358	4
0.267		14547.6	1843.36	4		16774.6	1666.79	4			0.267		28239	2498.53	4		17002	2117.66	4			0.267		27593.2	1218.71	4		9128.87	455.491	4			0.267		26818.5	619.448	4		7018.39	835.312	4
0.283		14130.4	1809.35	4		16098.6	1474.4	4			0.283		28061.8	2662.26	4		15974.4	2005.28	4			0.283		27135.1	1264.66	4		8904.12	265.299	4			0.283		26449.9	608.973	4		6861.95	955.977	4
0.3		14017.9	1769.06	4		16194.7	1662.72	4			0.3		27020.1	1582.78	4		16046.4	2003.01	4			0.3		27744.9	1354.4	4		8845.89	292.146	4			0.3		26588.7	716.582	4		6993.17	866.428	4
0.317		13914.3	1665.93	4		16235.8	1646.58	4			0.317		28552.8	2711.01	4		16140.3	2167.97	4			0.317		28172.7	1212.25	4		8048.57	305.736	4			0.317		26151.6	764.036	4		7057.6	751.304	4
0.333		13747.9	1698.09	4		16143.2	1721.83	4			0.333		27343.3	1850.53	4		15565.6	2040.96	4			0.333		27099	1309.36	4		8385.6	335.261	4			0.333		26009.1	658.314	4		6997.21	733.362	4
0.35		13769.2	1673.51	4		15896.8	1529.05	4			0.35		26929.3	1695.14	4		15545.2	2352.94	4			0.35		27123.9	1336.68	4		8593.99	633.928	4			0.35		25782.4	659.006	4		6653.3	784.208	4
0.367		13456.4	1582	4		15333.5	1252.02	4			0.367		26718.5	1954.06	4		15549.6	2066.23	4			0.367		26936.1	1424.84	4		8302.74	371.59	4			0.367		25688.8	698.063	4		6441.3	725.678	4
0.383		13315.5	1625.79	4		14948.1	1195.06	4			0.383		27290.2	2491.95	4		14821.9	1539.44	4			0.383		27500.8	1249.62	4		7455.5	215.359	4			0.383		25637.3	771.798	4		5988.8	774.469	4
0.4		13032.3	1641.6	4		14722.8	1259.53	4			0.4		27853.4	2325.69	4		14254.1	1787.18	4			0.4		27135.6	1569.36	4		8081.09	827.912	4			0.4		25697.6	790.307	4		6461.64	508.366	4
0.417		13000.3	1593.06	4		14473.7	1119.86	4			0.417		26891.2	2051.74	4		14045	1426.58	4			0.417		27319.9	1403.96	4		7459.74	246.196	4			0.417		25455.4	838.284	4		5982.8	739.056	4
0.433		13058.5	1572.37	4		14725	1174.16	4			0.433		25783.7	1855.01	4		14168.7	1544.29	4			0.433		27061.5	1164.64	4		7751.84	474.299	4			0.433		25517	669.761	4		5892.95	561.102	4
0.45		12712	1549.36	4		14180.4	1040.33	4			0.45		25355	1447.28	4		13544.8	1560.92	4			0.45		26922.8	1538.55	4		7122.44	397.375	4			0.45		25196.7	792.637	4		5808.58	578.984	4
0.467		12589.6	1588.44	4		14162.4	1224.74	4			0.467		25092.7	1323.73	4		12893.1	1288.67	4			0.467		26654.7	1392.46	4		6740.93	187.664	4			0.467		25054.2	732.619	4		5724.05	641.984	4
0.483		12443.8	1514.33	4		14109.5	1229.6	4			0.483		24640.8	1378.52	4		13340.6	1661.51	4			0.483		26507.4	1519.51	4		7005	342.765	4			0.483		24979.5	730.296	4		5674.18	577.484	4
0.5		12282	1482.38	4		13947.5	1179.19	4			0.5		24723.4	1457.14	4		13104.6	1476.7	4			0.5		26751.4	1249.04	4		6474.54	99.9411	4			0.5		24515.6	779.232	4		5434.75	680.13	4
0.517		12071.7	1651.51	4		13621.5	1256.7	4			0.517		25912.3	2346.31	4		12901.9	1626.92	4			0.517		26857.8	1257.36	4		6761.08	485.76	4			0.517		24555	785.013	4		5370.42	597.041	4
0.533		12049.6	1468.51	4		13391.9	1036.04	4			0.533		24475.4	1451.19	4		12766.6	1366.51	4			0.533		26563.2	1546.62	4		6655.09	363.551	4			0.533		24597.7	821.125	4		5273.77	504.465	4
0.55		11951.9	1508.71	4		13495.1	1136.37	4			0.55		24537.1	1495.64	4		12102.5	1355.78	4			0.55		26796.4	1330.25	4		6575.19	485.652	4			0.55		24630.7	810.102	4		5383.31	642.691	4
0.567		11749.8	1515.49	4		13372.7	1232.42	4			0.567		25576.1	2023.2	4		12459.5	1672.6	4			0.567		26644.8	1246.79	4		6245.86	541.302	4			0.567		24376.1	796.838	4		5529.24	463.594	4
0.583		11620.7	1501.31	4		13068.7	1138.46	4			0.583		24289.3	1343.38	4		12040.4	1362.44	4			0.583		26514.9	1367.44	4		6175.38	617.499	4			0.583		24320.7	824.376	4		5564.28	441.34	4
0.6		11512.3	1543.06	4		13017.6	1246.56	4			0.6		24249	2009.29	4		12009.2	1623.54	4			0.6		26753.3	1280.28	4		6049.12	316.501	4			0.6		24180.8	837.202	4		5281.59	638.755	4
0.617		11458.4	1490.65	4		13177.2	1348.26	4			0.617		23760.8	1816.34	4		11455.8	1616.35	4			0.617		25992.5	1330.12	4		5724.33	368.414	4			0.617		24061.4	756.559	4		5552.77	584.577	4
0.633		11300	1459.55	4		12983.7	1267.67	4			0.633		24475.5	2055.71	4		11582.2	1455.34	4			0.633		25762.5	1356.21	4		6055.44	366.412	4			0.633		23810.1	773.172	4		4958.16	670.299	4
0.65		11237.8	1481.43	4		12952.7	1323.31	4			0.65		24162.4	1306.66	4		11268.9	1532.65	4			0.65		25930.2	1547.85	4		5270.3	314.764	4			0.65		24069	834.833	4		5465.1	583.139	4
0.667		11010.3	1472.02	4		12282	1066.62	4			0.667		24785	1884.79	4		11474.5	1802.27	4			0.667		26193.8	1435.15	4		5745.83	446.943	4			0.667		23775.3	870.02	4		4944.32	756.102	4
0.683		11044.9	1391.4	4		12437	1063.82	4			0.683		24078.4	1658.11	4		11661.5	1418.11	4			0.683		25784.2	1529.2	4		5931.27	287.483	4			0.683		23681.6	849.308	4		4710.48	652.721	4
0.7		10757	1421.39	4		12208.1	1144.16	4			0.7		24082.2	1500.69	4		11258.3	1431.43	4			0.7		25544.9	1400.64	4		5449.73	655.481	4			0.7		24320.9	690.038	4		4759.53	524.88	4
0.717		10876.6	1425.58	4		12459.1	1216.33	4			0.717		23765.6	1821.78	4		10903.8	1587.82	4			0.717		25966.5	1442.64	4		4720.96	241.703	4			0.717		23646.3	851.418	4		4742.1	722.532	4
0.733		10704.4	1456.91	4		11777.9	892.394	4			0.733		22438.1	1196.99	4		10498.8	1559.7	4			0.733		25815.8	1528.37	4		5271.24	437.523	4			0.733		23628.6	849.052	4		4884.1	391.289	4
0.75		10530.3	1431.06	4		11601.6	929.736	4			0.75		21994.4	1339.96	4		10808.9	1477.88	4			0.75		25707.9	1665.4	4		5670.24	469.128	4			0.75		23453.3	909.412	4		4617.31	530.055	4
0.767		10427	1497.17	4		11537.2	1053.98	4			0.767		23083.2	1694.51	4		10538.7	1684.21	4			0.767		25672	1476.07	4		5203.57	239.725	4			0.767		23370.1	833.258	4		4740.39	348.325	4
0.783		10437.8	1451.23	4		11667.8	1065.7	4			0.783		22799.8	1425.88	4		10377.5	935.908	4			0.783		25700	1458.42	4		5241.62	487.486	4			0.783		23335.7	840.556	4		4742.51	519.482	4
0.8		10385.2	1392.57	4		11691.3	1049.99	4			0.8		22217.2	1278.52	4		10361.9	1332.51	4			0.8		25835.5	1322.39	4		4698.35	259.694	4			0.8		23184.9	844.112	4		4915.88	511.11	4
0.817		10157	1377.14	4		11503.9	1089.52	4			0.817		22313	1344.61	4		9916.42	1396.32	4			0.817		25687	1166.35	4		5076.35	377.099	4			0.817		22947.1	819.731	4		4880.51	581.255	4
0.833		10002	1442.99	4		11428.4	1203.8	4			0.833		21743.9	1347.93	4		10344.1	1290.62	4			0.833		25740.6	1550.2	4		5573.95	724.893	4			0.833		23179.9	932.388	4		4869.41	485.013	4
0.85		9996.29	1422.18	4		11409.8	1214.9	4			0.85		21816.8	940.26	4		10291.6	1388.07	4			0.85		25610.7	1319.15	4		5063.38	280.149	4			0.85		23043.3	862.135	4		4534.85	600.881	4
0.867		9934.02	1416.12	4		11252.8	1122.8	4			0.867		21838.5	1266.33	4		10334.1	1587.6	4			0.867		25613.2	1291.44	4		4846.37	286.906	4			0.867		22961.5	861.179	4		4602.1	523.83	4
0.883		9779.53	1497.65	4		11325.5	1372.01	4			0.883		22276.1	2033.92	4		9838.48	1607.55	4			0.883		25479.5	1399.06	4		4998.05	440.382	4			0.883		22945.5	874.525	4		4343.76	790.293	4
0.9		9707.13	1467.7	4		10801.8	1098.85	4			0.9		22135.8	1475.43	4		9684.62	1163.63	4			0.9		25452.7	1274.2	4		4652.27	225.808	4			0.9		22787.9	837.979	4		4146.15	681.875	4
0.917		9681.93	1526.48	4		10576.4	1002.75	4			0.917		21384.4	1260.55	4		9479.63	1179.49	4			0.917		25172.9	1510.61	4		5450.62	429.04	4			0.917		22802.9	849.485	4		4512.62	412.47	4
0.933		9612.36	1533.54	4		10524.4	1043.97	4			0.933		20337.4	1233.72	4		9776.7	1361.11	4			0.933		25234.6	1483.87	4		5181.26	216.254	4			0.933		22838.4	849.546	4		4394.99	448.94	4
0.95		9556.06	1511.3	4		10568.3	1071.11	4			0.95		21509.4	1634.22	4		9255.95	1438.35	4			0.95		25184.3	1515.92	4		5057.14	116.625	4			0.95		22854	856.897	4		4332.49	415.328	4
0.967		9547.43	1493.62	4		10461.8	991.522	4			0.967		20485.8	1269.16	4		9233.2	1072.24	4			0.967		25436.4	1430.48	4		4595.72	182.37	4			0.967		22749.7	882.603	4		4255.06	500.4	4
0.983		9457.03	1529.08	4		10200.6	955.945	4			0.983		21034.6	1694.55	4		9416.2	1470.95	4			0.983		25294.6	1544.66	4		4626.71	207.278	4			0.983		22744.4	896.894	4		4259.39	345.84	4
1		9389.51	1454.9	4		10483.9	1087.56	4			1		19907.4	963.658	4		9002.88	1296.75	4			1		25418.7	1179.33	4		4742.86	546.448	4			1		22503	825.421	4		4405.43	522.619	4
1.017		9217.96	1457.47	4		10281.1	1060.95	4			1.017		20463.6	1089.68	4		8642.74	1226.67	4			1.017		25216.1	1280.26	4		4882.38	415.243	4			1.017		22431.8	876.057	4		4856.12	440.988	4
1.033		9123.8	1452.25	4		10368.5	1212.94	4			1.033		20606.8	1585.9	4		8750.99	998.446	4			1.033		25220.8	1451.28	4		4834.57	402.274	4			1.033		22425.2	930.413	4		4523.19	599.714	4
1.05		9165.16	1491.43	4		9930.8	932.853	4			1.05		20323.8	1368.75	4		8867.97	1461.38	4			1.05		25127.3	1411.02	4		4175.72	264.856	4			1.05		22453	892.344	4		4530.64	515.727	4
1.067		9106.62	1439.96	4		10261.6	1136.67	4			1.067		20349.4	1775.1	4		8761.45	1250.61	4			1.067		25296.7	1378.97	4		4089.06	483.413	4			1.067		22347.8	922.796	4		4293.71	480.204	4
1.083		8999.38	1435.3	4		9906.58	962.826	4			1.083		20262.8	2069.92	4		8524.53	1209.43	4			1.083		24762.5	1419.08	4		4628.75	362.207	4			1.083		22163.4	846.912	4		4100.39	474.456	4
1.1		8854.63	1497.3	4		9575.89	910.138	4			1.1		20401.1	1871.58	4		8578.4	1322.63	4			1.1		24717.2	1417.71	4		4707.67	598.41	4			1.1		22186.6	852.772	4		4025.69	514.138	4
1.117		8757.72	1472.17	4		9623.44	1021.01	4			1.117		19930.6	965.054	4		8564.83	904.207	4			1.117		24785.8	1578.14	4		3993.14	173.361	4			1.117		22227.6	906.914	4		4181.74	454.175	4
1.133		8794.69	1412.09	4		9631.42	915.849	4			1.133		19614.3	1332.81	4		8506.83	1075.3	4			1.133		24746.7	1400.34	4		4004.31	124.23	4			1.133		21963.4	869.719	4		4528.44	483.755	4
1.15		8829.07	1516.67	4		9905.92	1167.2	4			1.15		19810.1	1675.21	4		8192.8	1014.22	4			1.15		25194.3	1430.8	4		4385.71	317.786	4			1.15		22199.8	919.59	4		4481.27	485.584	4
1.167		8744.13	1494.12	4		9634.41	1017.35	4			1.167		20155.6	1951.61	4		8392.82	1071.38	4			1.167		24888.7	1437.12	4		4084.19	133.135	4			1.167		22119.9	885.549	4		4158.37	464.003	4
1.183		8522.21	1466.19	4		9831.47	1320.6	4			1.183		19209.5	1287.42	4		8468.58	1102.06	4			1.183		25089.5	1350.02	4		4288.41	461.953	4			1.183		21973.4	936.326	4		4310.71	409.386	4
1.2		8475.05	1387.49	4		9722.88	1227.1	4			1.2		19867.3	1748.36	4		8316.37	1159.38	4			1.2		25070.5	1349.54	4		4022.25	236.137	4			1.2		21706.2	937.3	4		4277.46	614.834	4
1.217		8348.81	1359.54	4		9442.82	1089.96	4			1.217		18738.3	1321.54	4		8251.11	1186.65	4			1.217		24980.3	1555.47	4		4328.6	488.371	4			1.217		21835.4	1014.43	4		4022.1	513.632	4
1.233		8419.19	1466.09	4		9032.31	884.376	4			1.233		19488.6	1745.2	4		7511.58	843.307	4			1.233		24932.6	1554.63	4		4527.4	400.845	4			1.233		21948.7	973.883	4		3941.06	512.671	4
1.25		8357.28	1441	4		9423.96	1148.8	4			1.25		19085.1	1295.77	4		7723.09	749.488	4			1.25		24730	1518.37	4		4473.37	574.194	4			1.25		21771.9	955.943	4		3967.45	550.83	4
1.267		8303.92	1486.9	4		9250.49	1130.62	4			1.267		19188.9	1568.3	4		7684.17	1008.52	4			1.267		25043.3	1531.16	4		3947.04	412.933	4			1.267		21959.3	993.665	4		3636.33	564.32	4
1.283		8188.15	1443.3	4		9046.4	1041.89	4			1.283		18231.4	770.85	4		7214.89	1025.29	4			1.283		24750.3	1298.49	4		4102.28	236.75	4			1.283		21611.3	910.149	4		4019.78	345.097	4
1.3		8110.77	1434.43	4		8931.9	1029.14	4			1.3		18899.9	2039.9	4		6743.36	965.35	4			1.3		24723.5	1411.44	4		4893.75	814.562	4			1.3		21624	945.941	4		4135.03	507.058	4
1.317		8067.78	1392.8	4		9062.34	1079.51	4			1.317		18774.6	1815.16	4		7459.52	756.014	4			1.317		24552.2	1372.99	4		4390.96	642.206	4			1.317		21558.6	930.991	4		4528.89	469.085	4
1.333		7964.13	1390.13	4		8713.34	941.344	4			1.333		18478.2	1695.5	4		6861.54	843.431	4			1.333		24555.2	1487.76	4		4436.25	522.06	4			1.333		21528.2	976.357	4		3353.63	846.338	4
1.35		7851.2	1420.53	4		8613.85	989.844	4			1.35		18462.1	1961.88	4		7094.27	897.769	4			1.35		24803.2	1340.58	4		4111.03	772.271	4			1.35		21434.6	947.101	4		3825.58	499.512	4
1.367		7856.36	1531.69	4		8551.46	1033.92	4			1.367		18315.6	1827.01	4		7225.56	687.354	4			1.367		24692.7	1454.27	4		4036.31	292.902	4			1.367		21575	954.326	4		3846.16	549.179	4
1.383		7911.83	1494.34	4		8798.51	1115.57	4			1.383		18854.9	1553.13	4		6909.02	834.436	4			1.383		24487.3	1671.65	4		4469.76	720.393	4			1.383		21699.1	985.812	4		3665.04	512.002	4
1.4		7710.06	1593.38	4		8309.21	1060.8	4			1.4		17999.9	1443.35	4		6714.19	1029.78	4			1.4		24584.1	1591.79	4		4294.6	500.936	4			1.4		21632.7	960.66	4		4018.71	468.78	4
1.417		7678.25	1522.5	4		8484.34	1160.87	4			1.417		17503.1	1235.53	4		7146.37	811.825	4			1.417		24953.2	1242.02	4		4027.09	487.485	4			1.417		21398.1	941.311	4		3728.39	621.462	4
1.433		7710.61	1534.12	4		8509.19	1148.51	4			1.433		17218.7	1037.14	4		6905.3	649.756	4			1.433		24467.8	1437.7	4		4285.47	513.392	4			1.433		21451.1	928.296	4		3722.76	494.443	4
1.45		7693.26	1525.15	4		8715.46	1257.8	4			1.45		17024.9	858.561	4		6527.79	940.296	4			1.45		24442.6	1542.78	4		3808.01	212.468	4			1.45		21422.8	958.052	4		3930.22	424.147	4
1.467		7543.01	1499.04	4		8441.83	1206.86	4			1.467		16754.3	903.091	4		6771.94	702.053	4			1.467		24656.4	1532.18	4		3895.66	304.048	4			1.467		21411.4	1016.32	4		3931.47	465.354	4
1.483		7516.47	1529.03	4		8164.48	1073.64	4			1.483		17640.7	1643.84	4		6653.55	727.999	4			1.483		24608.7	1498.41	4		3996.33	346.808	4			1.483		21449.9	1010.33	4		3791.18	433.319	4
1.5		7499.41	1473.85	4		8131.01	998.706	4			1.5		17843.9	1631.43	4		6809.92	754.565	4			1.5		24381.8	1471.96	4		4013.29	343.555	4			1.5		21191.9	977.499	4		3622.37	387.629	4
1.517		7365.65	1491.85	4		8268.82	1225.53	4			1.517		17157.1	1371.73	4		6852.44	663.922	4			1.517		24417.3	1398.86	4		3679.76	296.636	4			1.517		21067.6	973.273	4		3787.37	421.28	4
1.533		7372.65	1445.42	4		8257.12	1166.39	4			1.533		16697.7	1067.06	4		6309.68	828.194	4			1.533		24332.2	1472.49	4		3866.08	309.958	4			1.533		21063.2	998.202	4		4116.62	630.334	4
1.55		7383.15	1445.93	4		8042.96	991.553	4			1.55		17632.9	1604.39	4		7025.13	472.827	4			1.55		24219.3	1660.57	4		3647.68	422.44	4			1.55		21042.4	1005.45	4		4380.91	592.565	4
1.567		7377.65	1442.96	4		7962.25	926.785	4			1.567		16481.1	1057.62	4		6235.91	831.522	4			1.567		24290.1	1426.91	4		3564.37	358.076	4			1.567		21055.1	956.901	4		4239.88	517.849	4
1.583		7187.3	1393.73	4		7962.27	1050.29	4			1.583		16736	1502.67	4		6834.91	654.376	4			1.583		24225.1	1600.36	4		3513.91	294.747	4			1.583		20941.1	1040.42	4		3928.2	450.215	4
1.6		7160.46	1412.41	4		7909.25	1042.71	4			1.6		15945	979.575	4		6270.39	760.631	4			1.6		24030.8	1448.4	4		4060.75	598.669	4			1.6		20773.3	966.103	4		3373.46	511.586	4
1.617		7127.04	1489.11	4		7866.98	1119.78	4			1.617		16395.4	1240.32	4		6355.56	722.84	4			1.617		24045	1379.7	4		3299.25	137.004	4			1.617		20778.8	937.903	4		3723.1	477.632	4
1.633		7005.7	1398.14	4		7737.64	1081.37	4			1.633		16509.2	1703.2	4		6625.49	661.422	4			1.633		24098.2	1586.26	4		3531.27	343.398	4			1.633		20753.8	1052.7	4		3597.32	629.958	4
1.65		7007.09	1457.53	4		7424.41	906.349	4			1.65		15605.9	896.361	4		6157.61	733.886	4			1.65		24166.2	1526.74	4		3394.23	169.165	4			1.65		20882.6	1025.82	4		3363.2	426.278	4
1.667		6991.64	1421.38	4		7622.74	1004.11	4			1.667		15610.5	902.883	4		6282.48	739.942	4			1.667		24183.8	1448.91	4		3480.25	441.619	4			1.667		20782.8	1006.42	4		3844.97	402.593	4
1.683		6994.14	1447.83	4		7675.63	1055.62	4			1.683		15694.3	1277.78	4		6113.25	652.504	4			1.683		24182.8	1297.63	4		3289.45	383.265	4			1.683		20818.5	963.056	4		3988.16	380.831	4
1.7		6858.08	1471.6	4		7284.67	938.381	4			1.7		15140.2	962.593	4		5958.45	623.339	4			1.7		23837.9	1471.03	4		4053.04	528.629	4			1.7		20644.8	954.899	4		3833.35	323.045	4
1.717		6834.01	1434.89	4		7251.15	913.55	4			1.717		15591.1	1087.11	4		6006.6	612.278	4			1.717		23858.8	1559.41	4		3753.75	448.869	4			1.717		20692.9	1011.27	4		3893.15	413.801	4
1.733		6851.7	1512.58	4		7437.61	1078.51	4			1.733		15175.1	849.97	4		6774.84	589.472	4			1.733		24097.2	1573.65	4		4065.17	431.019	4			1.733		20864	1028.77	4		3879.68	425.553	4
1.75		6736.18	1500.65	4		7361.1	1134.49	4			1.75		15794.5	1201.5	4		6312.96	489.742	4			1.75		23986.8	1292.44	4		3620.8	365.545	4			1.75		20578.5	970.741	4		3579.08	461.623	4
1.767		6757.06	1477	4		7124.13	923.771	4			1.767		15975.9	1816.32	4		6008.44	538.829	4			1.767		24365.9	1341.62	4		3297.8	165.236	4			1.767		20677.6	1002.37	4		3462.65	382.242	4
1.783		6752.69	1511.5	4		7307.89	1075.13	4			1.783		15066.8	971.748	4		5906.94	648.755	4			1.783		23861.6	1307.85	4		3493.17	441.963	4			1.783		20536.8	934.295	4		3390.14	407.212	4
1.8		6584.89	1419.92	4		7393.28	1195.9	4			1.8		14714.2	1106.22	4		6123.82	553.758	4			1.8		23875.6	1696.19	4		3836.03	394.507	4			1.8		20481	1067.77	4		3431.2	497.452	4
1.817		6706.78	1535.06	4		7089.6	983.958	4			1.817		15153.1	1081.82	4		5929.51	599.907	4			1.817		23618.7	1533.89	4		3442.28	374.749	4			1.817		20634.4	940.349	4		3122.83	468.113	4
1.833		6588.34	1468.19	4		7257.44	1128.61	4			1.833		15578.2	1803.99	4		6151.52	773.14	4			1.833		24166	1505.42	4		3424.38	426.355	4			1.833		20586.8	1048.14	4		3335.06	403.747	4
1.85		6515.64	1494.68	4		6701.41	866.663	4			1.85		14892.9	1000.81	4		5966.31	559.464	4			1.85		23939	1508.88	4		3770.13	468.413	4			1.85		20480.2	1017.52	4		3106.24	406.186	4
1.867		6454.37	1495.8	4		7405.5	1374.6	4			1.867		14344.2	780.782	4		5849.88	668.947	4			1.867		24079.9	1628.13	4		3803.72	321.013	4			1.867		20539.9	1068.4	4		3504.33	483.099	4
1.883		6557.92	1451.76	4		7412.21	1229.26	4			1.883		14587.7	1070.65	4		5753.58	454.639	4			1.883		24187.9	1479.06	4		3248.17	187.822	4			1.883		20408.5	1042.3	4		3642.89	323.457	4
1.9		6451.77	1540.5	4		7162.21	1239.58	4			1.9		14627.7	1011.71	4		5538.06	480.601	4			1.9		23971.6	1745.32	4		3972.19	483.803	4			1.9		20616.7	1087.41	4		3866.8	546.399	4
1.917		6430.71	1491.43	4		6762.58	950.352	4			1.917		14288.1	948.522	4		5628.23	389.115	4			1.917		24008.2	1296.37	4		3481.98	394.218	4			1.917		20412.3	983.553	4		3919.97	397.01	4
1.933		6310.53	1416.93	4		7103.51	1205.44	4			1.933		14583.8	1376.86	4		5575.42	542.287	4			1.933		24092.7	1338.92	4		3505.08	262.17	4			1.933		20300.6	1054.03	4		3227.02	688.577	4
1.95		6358.88	1489.55	4		6917.29	1099.76	4			1.95		15031.4	1676.89	4		5545.32	531.868	4			1.95		24123.7	1417.38	4		3121.65	278.97	4			1.95		20346.7	1028.61	4		3452.61	502.473	4
1.967		6312.46	1449.24	4		6994.36	1127.1	4			1.967		14524.5	1380.87	4		5855.14	441.575	4			1.967		23779.6	1514.14	4		3458.8	462.76	4			1.967		20312.5	1029.33	4		3678.97	362.797	4
1.983		6193.17	1509.91	4		6451.48	946.224	4			1.983		13832.7	1121.15	4		5468.28	516.293	4			1.983		23916.5	1406	4		2880.59	121.75	4			1.983		20267	1026.33	4		3210.68	423.07	4
2		6231.22	1460.71	4		6704.7	1041.29	4			2		13908.5	1452.11	4		5316.93	561.049	4			2		23745.5	1452.34	4		3415.37	476.602	4			2		20213.3	1027.04	4		3531.1	520.118	4
2.017		6218.86	1494.67	4		6696.23	1065.88	4			2.017		14210.5	1045.92	4		4982.22	555.766	4			2.017		23862.4	1389.82	4		3673.13	618.805	4			2.017		20339.3	1031	4		3247.95	399.503	4
2.033		6075.96	1426.64	4		6467.17	976.574	4			2.033		14634	1511.37	4		5309.91	457.307	4			2.033		23964.8	1337.23	4		3746.92	265.274	4			2.033		20076.5	1033.88	4		3001.94	405.479	4
2.05		6074.29	1458.21	4		6575.46	1085.32	4			2.05		13559.7	1206.75	4		5481.99	598.466	4			2.05		23772.7	1644.52	4		3142.01	331.88	4			2.05		20279.9	1095.71	4		3681.31	365.12	4
2.067		6094.06	1504.55	4		6406.98	991.23	4			2.067		12860.6	813.757	4		5054.33	417.362	4			2.067		23531.8	1436.13	4		3140.58	285.785	4			2.067		20114.3	1000.5	4		3311.93	455.186	4
2.083		6037.43	1489.33	4		6602.25	1161.36	4			2.083		13553.6	1012.04	4		5599.36	735.879	4			2.083		23389.5	1651.28	4		3310.52	518.177	4			2.083		20071.2	1035.3	4		3728.55	387.326	4
2.1		6043.41	1502.64	4		6550.83	1131.29	4			2.1		13169.9	884.662	4		5451.63	451.287	4			2.1		23275.9	1626.53	4		3770.7	605.19	4			2.1		20110.1	1033.66	4		3748.62	565.203	4
2.117		5907.46	1465.91	4		6678.27	1302.7	4			2.117		13164.7	1135.01	4		5023.77	630.63	4			2.117		23687.2	1475.91	4		3809.89	408.585	4			2.117		20053.9	1066.77	4		3969.85	635.364	4
2.133		5922.49	1416.01	4		6230.39	927.773	4			2.133		13070.7	893.997	4		5224.93	431.958	4			2.133		23501.3	1487.53	4		3498.96	332.983	4			2.133		19984.4	1051.91	4		3039.07	674.001	4
2.15		5942.25	1540.08	4		6180.57	1009.39	4			2.15		13971	1452.84	4		5277.57	542.994	4			2.15		23601.3	1576.1	4		3784.64	653.571	4			2.15		20108.1	1062.54	4		2856.98	261.051	4
2.167		5814.19	1415.1	4		6380.03	1122.28	4			2.167		13866.6	1846.41	4		5210.69	630.757	4			2.167		23315.7	1517.76	4		3236.71	292.471	4			2.167		19860.8	1048.37	4		2983.41	491.778	4
2.183		5878.73	1503.03	4		6427.19	1185.85	4			2.183		13605.3	1528.33	4		5131.94	466.029	4			2.183		23529.3	1387.41	4		3796.51	532.603	4			2.183		19944.5	1003.59	4		3366.09	435.058	4
2.2		5776.64	1420.41	4		6373.01	1159.82	4			2.2		13250.1	1112.53	4		4676.59	471.756	4			2.2		23571.8	1359.83	4		3236.15	277.102	4			2.2		19867.7	1051.34	4		3002.89	525.152	4
2.217		5784.8	1478.31	4		6257.02	1126.43	4			2.217		13221.7	1272.25	4		5133.06	381.429	4			2.217		23217.9	1492.11	4		3460.53	384.731	4			2.217		19879.9	1018.71	4		3173.75	375.92	4
2.233		5774.33	1441.57	4		6299.91	1127.3	4			2.233		13256.6	1152.93	4		5254.19	390.119	4			2.233		23473.3	1413.52	4		2868.18	242.097	4			2.233		19843.1	1042.91	4		3141.62	348.808	4
2.25		5709.4	1506.37	4		5987.06	1022.13	4			2.25		13120.8	1677.38	4		4906.57	381.751	4			2.25		23565.1	1544.52	4		3955.09	679.109	4			2.25		19909.5	1063.67	4		3051.44	279.736	4
2.267		5780.95	1499.56	4		6112.58	1037.23	4			2.267		13177	1554.63	4		4473.54	544.365	4			2.267		23547.4	1381.59	4		2915.74	349.733	4			2.267		19839	1036.59	4		3272.87	335.876	4
2.283		5651.81	1483.59	4		6001.61	1067	4			2.283		13189.5	1496.9	4		4688.57	422.523	4			2.283		23312.1	1354.95	4		2763.73	350.345	4			2.283		19696.6	989.297	4		3441.24	414.534	4
2.3		5692.39	1444.29	4		6132.41	1083.49	4			2.3		13157.1	1498.19	4		5019.8	410.275	4			2.3		23617.3	1589.84	4		3208.41	562.41	4			2.3		19893.6	1107.8	4		3555.83	453.746	4
2.317		5503.09	1452.05	4		5933.88	1121.41	4			2.317		13502.4	1629.61	4		4420.16	486.771	4			2.317		23541.3	1293.79	4		3029.88	578.655	4			2.317		19602.9	1043.39	4		3447.01	404.335	4
2.333		5602.15	1467.57	4		6131.54	1171.96	4			2.333		12477	1079.7	4		5193.97	497.903	4			2.333		23169.1	1456.62	4		3019.53	570.128	4			2.333		19635	988.131	4		3365.77	467.265	4
2.35		5551.21	1444.76	4		5832.31	973.861	4			2.35		12106.8	791.228	4		5077.41	460.673	4			2.35		23692.7	1254.23	4		3059.57	400.022	4			2.35		19668	1044.02	4		3435.4	445.311	4
2.367		5595.18	1463.51	4		5969.35	1034	4			2.367		12244.2	927.675	4		4882.42	516.169	4			2.367		23504.6	1576.66	4		3374.62	537.602	4			2.367		19840	1111.72	4		3186.16	458.622	4
2.383		5464.47	1463.31	4		5791.47	1045.26	4			2.383		12624.9	1446.43	4		4827.23	317.625	4			2.383		23472.9	1452.75	4		2731.74	340.805	4			2.383		19586.7	1052.2	4		3490.21	512.773	4
2.4		5475.31	1459.73	4		5743.97	1013	4			2.4		12160.9	1300.24	4		4831.75	339.483	4			2.4		23431.1	1448.02	4		3399.99	533.106	4			2.4		19726.6	1090.57	4		3215.33	531.348	4
2.417		5413.08	1403.66	4		5761.28	1012.12	4			2.417		12092.8	817.078	4		5043.92	614.555	4			2.417		23443.6	1259.25	4		3405.63	465.97	4			2.417		19494.9	1055.85	4		3230.6	409.815	4
2.433		5384.06	1493.09	4		5880.97	1194.86	4			2.433		11561.1	778.882	4		4434.58	448.039	4			2.433		23047.6	1629.77	4		3670.15	391.478	4			2.433		19624.5	1064.55	4		3113	423.695	4
2.45		5364.71	1500.72	4		5634.18	1070.54	4			2.45		12231	1261.34	4		4838.81	385.124	4			2.45		23514.5	1450.63	4		3333.15	486.991	4			2.45		19615.3	1083.09	4		3081.07	434.619	4
2.467		5377.42	1493.02	4		5679.45	1115.79	4			2.467		11939	1353.23	4		4753.86	397.719	4			2.467		23098.4	1601.5	4		3264.1	377.214	4			2.467		19545.3	1047.75	4		2581	602.855	4
2.483		5396.07	1504.66	4		5759.49	1126.64	4			2.483		11657.2	786.376	4		4760.13	490.02	4			2.483		23252.4	1499.99	4		3543.27	193.745	4			2.483		19603.8	1050.46	4		2762.49	576.573	4
2.5		5288.7	1433.23	4		5375.69	898.985	4			2.5		12315.9	1644.23	4		5024.89	661.917	4			2.5		23156.1	1595.88	4		3963.9	537.911	4			2.5		19461.1	1089.79	4		2626.37	487.472	4
2.517		5315.3	1474.74	4		5487.4	962.837	4			2.517		11588.8	872.023	4		4980.15	458.033	4			2.517		23129.4	1603.69	4		3391.79	458.871	4			2.517		19644.3	1100.34	4		2886.48	319.718	4
2.533		5351.95	1520.95	4		5779.29	1174.1	4			2.533		11964.9	1387.74	4		4762.85	730.582	4			2.533		23270.5	1598.02	4		3595.7	699.02	4			2.533		19653.4	1096.2	4		3503.79	642.966	4
2.55		5195.87	1509.08	4		5516.15	1128.26	4			2.55		11706.4	1202.65	4		4551.07	395.06	4			2.55		23273.9	1436.68	4		3328.5	346.049	4			2.55		19452.4	1049.37	4		3086.63	545.756	4
2.567		5189.66	1499.59	4		5453.02	1085.52	4			2.567		11926.3	1525.6	4		4541.9	450.498	4			2.567		23346.8	1363.35	4		3411.97	510.713	4			2.567		19437.1	1049.75	4		2861.87	369.368	4
2.583		5191.15	1463.26	4		5209.09	894.756	4			2.583		12035.7	1512.32	4		4682.88	693.744	4			2.583		23157.4	1272.79	4		3229.3	269.911	4			2.583		19371.4	1028.09	4		2493.71	420.541	4
2.6		5179.8	1538.11	4		5397.33	1083.77	4			2.6		11227.8	731.596	4		4770.34	618.722	4			2.6		23036.5	1485.93	4		3601.31	666.863	4			2.6		19534.9	1046.44	4		2827.57	439.487	4
2.617		5075.18	1457.35	4		5197.29	970.936	4			2.617		11726.8	1220.82	4		4205.28	242.569	4			2.617		23452	1217.05	4		3446.53	567.954	4			2.617		19228.4	1041.47	4		2888.12	462.476	4
2.633		5150.77	1433.38	4		5571.85	1116.48	4			2.633		12052.3	1756.57	4		4788.63	411.503	4			2.633		23329.3	1312.01	4		3172.78	437.866	4			2.633		19292.4	1053.91	4		2768.93	459.59	4
2.65		5153.41	1481.04	4		5391.13	1022.69	4			2.65		11188.2	1336.44	4		4441.26	397.297	4			2.65		23293.8	1371.63	4		3511.69	662.259	4			2.65		19361.7	1047.08	4		2448.29	486.485	4
2.667		4997.16	1414.99	4		5297.49	1059.89	4			2.667		11590.3	1546.64	4		4338.53	261.841	4			2.667		22991.9	1401.13	4		3492.12	606.361	4			2.667		19120.2	1064.46	4		2511.98	365.903	4
2.683		5085.88	1489.56	4		5235	1012.24	4			2.683		11620.1	1347.72	4		4261.96	259.393	4			2.683		23579.9	1370.56	4		3340.48	408.346	4			2.683		19429.4	1099.72	4		2863.05	511.935	4
2.7		5022.05	1495.06	4		5422.08	1170.91	4			2.7		11742.6	1850.78	4		4567.85	363.138	4			2.7		23320.6	1362.34	4		3074.14	370.162	4			2.7		19245.9	1053.65	4		2833.6	384.282	4
2.717		4941.8	1398.04	4		5222.68	1014.72	4			2.717		11557.7	1602.13	4		4429.24	644.56	4			2.717		23276.6	1392.45	4		3200.93	368.971	4			2.717		19141.4	1110.65	4		2733.53	362.991	4
2.733		5041.78	1527.93	4		5078.72	973.258	4			2.733		10646.5	811.084	4		4536.72	384.936	4			2.733		23150.7	1469.59	4		3448.96	638.974	4			2.733		19262.8	1064.73	4		2842.45	299.594	4
2.75		5007.05	1444.24	4		5091.45	933.017	4			2.75		11032.3	1198.95	4		4437.57	279.321	4			2.75		23149.6	1272.07	4		3688.99	583.897	4			2.75		19138.2	1035.24	4		2768.07	405.586	4
2.767		5024.56	1482.79	4		5149.2	989.383	4			2.767		10795.5	1062.8	4		4763.2	528.731	4			2.767		23350.9	1235.36	4		2842.47	366.359	4			2.767		19292.7	1060.12	4		2614.14	455.541	4
2.783		4874.81	1448.45	4		5071.56	1036.68	4			2.783		10514.4	1180.02	4		4607.58	339.652	4			2.783		22861.4	1550.89	4		2952.64	399.248	4			2.783		19094	1087.94	4		2969.07	474.59	4
2.8		4985.09	1501.98	4		5087.88	993.776	4			2.8		10515	1064.47	4		4368.79	380.631	4			2.8		23048.9	1464.7	4		3261.41	291.897	4			2.8		19285.9	1066.64	4		3075.89	411.662	4
2.817		4904.61	1458.92	4		5141.46	1057.08	4			2.817		10672.9	1185.52	4		4327.26	276.745	4			2.817		22964.7	1195.6	4		3669.32	748.266	4			2.817		19055.2	1022.67	4		2591.11	398.533	4
2.833		4859.05	1464.93	4		5075.11	1051.2	4			2.833		11255.8	1589.62	4		4402.23	363.633	4			2.833		22894.6	1592.67	4		2918.23	389.026	4			2.833		19190	1106.28	4		2562.23	308.952	4
2.85		4840.81	1459.09	4		5289.35	1196.51	4			2.85		9794.32	549.919	4		3956.23	216.232	4			2.85		22965.1	1263.85	4		3232.1	370.946	4			2.85		18949	1032.79	4		2989.93	478.044	4
2.867		4841.17	1437.7	4		5011.12	1001.09	4			2.867		9644.8	737.723	4		4300.54	433.989	4			2.867		22937	1560.69	4		3317.02	354.2	4			2.867		19006.3	1088.45	4		2766.83	445.529	4
2.883		4829.65	1442.28	4		5131.85	1089.69	4			2.883		10593.4	1124.25	4		4455.25	442.399	4			2.883		22790.9	1358.34	4		3593.44	461.26	4			2.883		18929.4	1031.09	4		2902.65	483.975	4
2.9		4732.99	1428.38	4		5195.67	1207.62	4			2.9		9841.1	802.752	4		4406.52	502.145	4			2.9		22892.7	1530.52	4		3052.09	636.005	4			2.9		18973.7	1102.6	4		2879.57	454.22	4
2.917		4780	1448.34	4		4768.12	903.924	4			2.917		10324.6	1199.67	4		4419.87	514.39	4			2.917		22800.5	1393.86	4		3153.37	346.751	4			2.917		18971.1	1060.32	4		2663.48	494.274	4
2.933		4753.26	1512.66	4		4954.45	1106.5	4			2.933		9868.06	638.028	4		4339.54	509.334	4			2.933		23115.9	1515.52	4		3135.26	528.826	4			2.933		19137.3	1112.73	4		2668.05	408.942	4
2.95		4707.22	1472.91	4		5012.72	1151.39	4			2.95		10298	1233.81	4		4272.53	363.862	4			2.95		22956.8	1451.18	4		3004.7	341.891	4			2.95		18989.9	1085.06	4		2967.88	471.123	4
2.967		4672.94	1440.21	4		4835.63	1007.68	4			2.967		10626.8	1310.89	4		3985.16	454.176	4			2.967		22882.4	1398.85	4		2457.61	302.285	4			2.967		18903.3	1086.4	4		3209.62	611.83	4
2.983		4729.68	1468.21	4		4680.97	885.058	4			2.983		10481.6	1610.23	4		4189.88	391.404	4			2.983		22859.2	1578.19	4		2904.81	374.533	4			2.983		18999.4	1092.9	4		2789.47	460.134	4
3		4686.42	1419.89	4		4907.11	1019.51	4			3		10236.3	1382.35	4		4334.26	547.042	4			3		22679.4	1406.93	4		3069.12	475.803	4			3		18822	1063.68	4		2658.91	442.276	4
3.017		4579.06	1444.18	4		4883.77	1117.35	4			3.017		10344.5	1323.03	4		4120.8	438.451	4			3.017		23001.3	1281.57	4		2686.06	183.443	4			3.017		18750.1	1062.23	4		2866.64	449.72	4
3.033		4591.8	1454.19	4		4976.11	1211.62	4			3.033		10221.1	1254.09	4		4130.02	550.406	4			3.033		22548.3	1480.49	4		3086.25	472.659	4			3.033		18849.1	1073.5	4		2968.17	456.631	4
3.05		4573.82	1488.14	4		4826.99	1142.92	4			3.05		9521.42	702.697	4		3958.74	367.692	4			3.05		23073.3	1365	4		2934.52	444.889	4			3.05		18916.1	1091.35	4		2538.73	498.653	4
3.067		4588.38	1424.36	4		5017.3	1187.91	4			3.067		9418.18	867.146	4		4067.41	405.973	4			3.067		22560.4	1441.7	4		2963.53	540.819	4			3.067		18711.1	1044.17	4		2758.23	414.022	4
3.083		4615.5	1465.38	4		4824.03	1076.27	4			3.083		10169.4	1267.45	4		4155.56	408.554	4			3.083		22792.9	1418.13	4		3052.27	494.27	4			3.083		18894.4	1075.8	4		2970.29	520.453	4
3.1		4519.52	1468.8	4		4651.72	1059.71	4			3.1		9215.87	725.926	4		3933.42	530.833	4			3.1		22566.9	1500.38	4		3124.68	594.631	4			3.1		18812.8	1073.95	4		3087.64	447.501	4
3.117		4535.53	1423.84	4		4975.41	1219.04	4			3.117		9918.4	1404.06	4		4414.42	754.868	4			3.117		22657.9	1330.85	4		2997.54	403.815	4			3.117		18727.6	1070.33	4		2698.75	463.013	4
3.133		4482.23	1468.56	4		4383.38	893.893	4			3.133		10482.5	1710.86	4		3833.57	380.51	4			3.133		22854.9	1289.1	4		2901.78	521.025	4			3.133		18789.5	1075.59	4		2490.51	286.284	4
3.15		4488.95	1466.21	4		4864.95	1226.07	4			3.15		9623.58	1160.51	4		3869.86	350.211	4			3.15		22664.6	1506.54	4		2759.05	354.051	4			3.15		18764.3	1079.94	4		2843.47	515.722	4
3.167		4474.27	1457.53	4		4536.11	1012.34	4			3.167		9567.35	856.415	4		4123.16	579.174	4			3.167		22741.3	1274.34	4		2879.14	171.234	4			3.167		18669.5	1047.36	4		2714.79	413.71	4
3.183		4447.27	1495.43	4		4919.53	1312.69	4			3.183		9549.67	1174.46	4		3910.49	434.16	4			3.183		22449	1405.36	4		3058.34	379.661	4			3.183		18684.6	1017.54	4		2791.95	461.736	4
3.2		4476.67	1533.31	4		4820.25	1275.38	4			3.2		9974.5	1577.67	4		3726.87	407.32	4			3.2		22212.2	1298.97	4		2738.88	450.796	4			3.2		18650.9	976.047	4		2921.81	519.63	4
3.217		4418.87	1404.07	4		4628.41	1059.36	4			3.217		9266.45	1091.1	4		3751.64	377.69	4			3.217		22763	1466.34	4		2446.42	108.567	4			3.217		18706	1123.14	4		2768.7	521.655	4
3.233		4495.99	1437.16	4		4755.67	1104.32	4			3.233		9924.46	1713.19	4		3553.62	427.662	4			3.233		22693.4	1322.38	4		3207.38	558.044	4			3.233		18647.2	1056.45	4		2722.47	396.325	4
3.25		4343.7	1440.96	4		4559.63	1108.75	4			3.25		9824.24	1453.14	4		3498.96	263.64	4			3.25		22632.8	1530.85	4		3211.13	531.233	4			3.25		18659.6	1112.22	4		2686.91	298.458	4
3.267		4450.61	1436.23	4		4798.64	1170.36	4			3.267		9175.66	1081.71	4		3673.97	334.808	4			3.267		22750.5	1250.51	4		2962.52	690.189	4			3.267		18613.7	1033.5	4		2456.53	444.07	4
3.283		4432.76	1429.07	4		4471.84	958.231	4			3.283		9247.48	1046.97	4		3904.74	353.532	4			3.283		22613	1349.79	4		2739.18	338.269	4			3.283		18585.4	1069.04	4		2124.47	643.106	4
3.3		4312.58	1458.7	4		4765.08	1301.33	4			3.3		9165.12	1214.28	4		3710.99	338.681	4			3.3		22661.5	1482.98	4		3315.35	569.071	4			3.3		18627.4	1103.89	4		2591.19	619.378	4
3.317		4340.37	1412.2	4		4476.33	1040.35	4			3.317		8830.96	1064.72	4		3835.81	416.024	4			3.317		22799.8	1334.71	4		2918.42	260.13	4			3.317		18587	1096.53	4		2440.87	565.758	4
3.333		4307.19	1368.31	4		4662.47	1143.6	4			3.333		8796.97	1005.23	4		3927.41	481.973	4			3.333		22873.2	1480.32	4		2826.82	362.666	4			3.333		18576.1	1159.94	4		2752.8	455.261	4
3.35		4318.32	1447.51	4		4366.87	992.674	4			3.35		9816.01	1647.5	4		3677.61	556.268	4			3.35		22284	1549.72	4		3180.17	469.435	4			3.35		18555.2	1076.4	4		2715.25	479.849	4
3.367		4295.86	1384.26	4		4537.87	1064.62	4			3.367		9496.94	1527.72	4		3630.99	298.535	4			3.367		22528.3	1310.94	4		2998.09	632.174	4			3.367		18449.3	1062.01	4		2722.64	423.791	4
3.383		4283.23	1410.31	4		4582.91	1138.33	4			3.383		9251.33	1146.71	4		3754.93	352.316	4			3.383		22701.2	1429.57	4		2848.61	374.535	4			3.383		18529.6	1116.23	4		2657.78	401.445	4
3.4		4268.08	1443.82	4		4425.37	1084.82	4			3.4		8925.3	899.56	4		3268.34	264.728	4			3.4		22605.4	1393.72	4		3084.63	459.679	4			3.4		18548.4	1081.57	4		3142.12	532.894	4
3.417		4206.17	1458.38	4		4771.17	1372.31	4			3.417		8492.95	765.637	4		3661.77	393.738	4			3.417		22516.7	1457.34	4		2778.11	481.65	4			3.417		18493.5	1083.18	4		3110.41	537.416	4
3.433		4228.83	1462.48	4		4433.24	1128.85	4			3.433		8706.9	993.473	4		3975.1	663.2	4			3.433		22593.6	1224.97	4		2619.39	348.114	4			3.433		18428.8	1047.32	4		3130.96	409.49	4
3.45		4212.26	1467.36	4		4460.35	1176.57	4			3.45		8279.77	795.524	4		3510.31	249.971	4			3.45		22438.6	1281.17	4		2690.6	433.103	4			3.45		18400.9	1042.08	4		2967.71	438.36	4
3.467		4278.12	1485.45	4		4412.73	1084.16	4			3.467		9217.77	1614.54	4		3408	496.915	4			3.467		22606.1	1388.74	4		3371.09	849.954	4			3.467		18555.5	1081.17	4		2888.82	306.614	4
3.483		4245.65	1480.03	4		4682.7	1297.13	4			3.483		8721.1	871.168	4		3499.35	347.227	4			3.483		22520.7	1322.2	4		2369.24	284.411	4			3.483		18506.1	1053.54	4		2824.76	420.479	4
3.5		4194.97	1426.13	4		4030.54	851.205	4			3.5		8598.83	862.397	4		3390.11	379.766	4			3.5		22016.5	1363.76	4		3078.77	716.294	4			3.5		18368	1030.71	4		2248.96	393.69	4
3.517		4192.62	1449.87	4		4511.87	1191.28	4			3.517		8495.01	903.744	4		3393.11	288.047	4			3.517		22208.7	1548.24	4		2829.31	379.749	4			3.517		18452.9	1084.59	4		2164.15	424.084	4
3.533		4220.05	1446.78	4		4259.71	999.287	4			3.533		8973.04	1494.18	4		3454.56	671.046	4			3.533		22206.8	1454.71	4		2750.53	454.701	4			3.533		18420.1	1060.28	4		2505.33	500.54	4
3.55		4172.66	1531.22	4		4304.06	1154.55	4			3.55		8787.92	1261.17	4		3542.55	548.201	4			3.55		22481.8	1187.86	4		3011.85	328.759	4			3.55		18468.9	1006.48	4		2644.23	567.81	4
3.567		4073.35	1491.51	4		4348.26	1241.61	4			3.567		8391.42	930.606	4		3539.83	313.225	4			3.567		22148.3	1526.82	4		2767.71	490.594	4			3.567		18466.6	1088.18	4		2525.19	432.788	4
3.583		4089.84	1395.68	4		4243	1050.58	4			3.583		9010.28	1513.89	4		3502.02	455.477	4			3.583		22212.2	1432.9	4		2644.88	360.02	4			3.583		18296.3	1087.21	4		2594.14	389.15	4
3.6		4086.87	1429.75	4		4164.57	1026.08	4			3.6		8565.54	966.315	4		4008.06	654.895	4			3.6		22248.6	1543.35	4		2587.64	371.798	4			3.6		18382.1	1107.4	4		2743.02	489.227	4
3.617		4043.43	1436.7	4		4217.51	1120.81	4			3.617		8929.69	1693.19	4		3594.82	513.052	4			3.617		22361.9	1400.54	4		2614.02	356.414	4			3.617		18393	1103.11	4		2752.36	368.658	4
3.633		4076.52	1442.04	4		4268.5	1130.72	4			3.633		8989.37	1855.64	4		3524.84	549.711	4			3.633		22139.9	1525.87	4		2834.83	288.937	4			3.633		18312.1	1068.28	4		2696.64	388.723	4
3.65		4034.99	1382.69	4		4379.42	1174.99	4			3.65		8801.66	1327.16	4		3161.72	234.926	4			3.65		22191.1	1353.54	4		2678.91	456.697	4			3.65		18196.9	1058.78	4		2909.44	454.511	4
3.667		4069.93	1454.83	4		4336.03	1184.98	4			3.667		9040.5	1664.58	4		3286.42	271.611	4			3.667		22086.8	1500.15	4		2779.25	648.257	4			3.667		18332.1	1078.05	4		2782.84	489.696	4
3.683		4032.69	1423.6	4		4025.48	964.823	4			3.683		8605.51	1390.23	4		3442.71	322.174	4			3.683		21824.4	1563.79	4		2446.13	230.214	4			3.683		18223.6	1071.67	4		2689.34	431.591	4
3.7		4069.46	1471.2	4		4336.29	1189.25	4			3.7		8511.03	1236.78	4		2916.9	318.482	4			3.7		22340.9	1384.37	4		2708.74	456.183	4			3.7		18358.4	1067.9	4		2701.02	524.883	4
3.717		4000.03	1463.15	4		4074.31	1066.85	4			3.717		8281.27	1072.56	4		3114.86	251.527	4			3.717		22263.2	1330.36	4		2512.18	534.784	4			3.717		18195.3	1054.56	4		2912.03	548.72	4
3.733		3952.01	1383.83	4		4193.86	1133.85	4			3.733		7718.72	784.438	4		3295.06	382.496	4			3.733		21938	1479.31	4		2590.03	415.025	4			3.733		18032.6	1063.25	4		2932.2	482.778	4
3.75		4022.58	1452.27	4		4035.34	1016.5	4			3.75		8275.97	1269.99	4		3332.72	319.679	4			3.75		22025.6	1485.43	4		2633.26	387.669	4			3.75		18187.4	1041.89	4		3148.16	473.384	4
3.767		3930.8	1391.15	4		4160.13	1122.75	4			3.767		9036.91	1746.96	4		3091.36	377.267	4			3.767		22301.6	1434.01	4		2822.39	559.206	4			3.767		18161.4	1107.74	4		2870.1	356.847	4
3.783		3897.64	1411	4		3715	893.041	4			3.783		8705.54	1554.13	4		3198.44	405.285	4			3.783		22173.9	1589.68	4		2703.86	337.784	4			3.783		18135.6	1136.11	4		2635.64	265.585	4
3.8		3958.21	1408.09	4		3965.6	976.025	4			3.8		7751.62	830.045	4		2715.68	261.423	4			3.8		22295.7	1572.75	4		2629.25	459.7	4			3.8		18290	1143.57	4		2766.33	302.774	4
3.817		3936.9	1463.09	4		3820.26	957.64	4			3.817		8064.48	950.152	4		3140.42	374.939	4			3.817		22248.3	1438.38	4		2728.57	466.129	4			3.817		18230.8	1101.81	4		2411.41	353.038	4
3.833		3895.76	1403	4		3935.45	1012.34	4			3.833		7757.51	1020.57	4		3299.69	452.613	4			3.833		22214.6	1299.66	4		2684.14	601.104	4			3.833		18080.4	1075.44	4		2451.3	348.424	4
3.85		3904.86	1462.12	4		3852.2	1005.25	4			3.85		8302.77	1185.4	4		3054.02	305.463	4			3.85		22181.1	1435.82	4		2968.11	683.696	4			3.85		18220.6	1080.48	4		2461.24	483.885	4
3.867		3823.99	1396.22	4		3971.34	1086	4			3.867		8064.47	1196.68	4		3043.19	293.679	4			3.867		21946.4	1565.91	4		2511.16	473.088	4			3.867		18078.9	1115.94	4		2375.26	419.089	4
3.883		3907.13	1437.45	4		4053.84	1104.55	4			3.883		7281.32	610.538	4		3168.62	442.677	4			3.883		21897.9	1392.72	4		2520.3	596.67	4			3.883		18035.7	1032.48	4		2197.38	396.29	4
3.9		3858.21	1452.41	4		3818.28	996.622	4			3.9		8135.14	1456.59	4		3060.34	330.832	4			3.9		21951	1556.83	4		3130.71	739.367	4			3.9		18172.8	1082.49	4		2432.2	454.88	4
3.917		3878.64	1464.6	4		3870.78	1031.49	4			3.917		8319.4	1490.35	4		3470.54	521.954	4			3.917		22147	1459.38	4		2811.7	592.495	4			3.917		18117.9	1080.54	4		2661.45	509.419	4
3.933		3857.51	1506.24	4		4156.76	1262.98	4			3.933		7632.77	929.966	4		2686.7	219.743	4			3.933		21864.1	1541.21	4		2516.96	628.832	4			3.933		18187.7	1066.29	4		2813.6	460.74	4
3.95		3809.28	1459.25	4		3959.42	1151.54	4			3.95		7826.73	997.881	4		3053.87	384.866	4			3.95		22015.4	1574.28	4		2985.73	556.692	4			3.95		18063.9	1094.74	4		2915.5	522.473	4
3.967		3783.62	1409.14	4		3686.17	928.915	4			3.967		7813.71	1022.03	4		3148.13	338.876	4			3.967		22194.9	1320.86	4		2665.16	560.289	4			3.967		17985.1	1091.37	4		2723.82	387.837	4
3.983		3808.53	1424.23	4		3904.8	1052.1	4			3.983		7282.22	623.642	4		3186.24	332.011	4			3.983		22122.1	1302.58	4		2896.42	544.207	4			3.983		17985.5	1054.76	4		2691.83	308.147	4
4		3791.3	1395.95	4		3877.47	1028.47	4			4		7395.1	776.61	4		3195.07	387.857	4			4		22015.6	1592.18	4		2301.71	476.452	4			4		17956.2	1108.28	4		2615.91	409.426	4
4.017		3766.86	1440.75	4		3758.86	1018.3	4			4.017		6999.15	651.49	4		2864.99	377.178	4			4.017		22045.5	1271.72	4		2535.41	345.766	4			4.017		18054	1067.85	4		2228.35	332.62	4
4.033		3800.69	1440.95	4		3831.45	1049.96	4			4.033		7241.71	1029.08	4		2776.67	200.626	4			4.033		21626.3	1393.3	4		2532.29	610.479	4			4.033		17905.2	1017.45	4		2697.29	426.246	4
4.05		3743	1469.62	4		3985.58	1216.68	4			4.05		8046.11	1508.27	4		3092.55	352.691	4			4.05		22104	1410.61	4		2660.91	496.11	4			4.05		17958.9	1061.47	4		2786.37	629.082	4
4.067		3741.12	1439.83	4		3758.46	1049.36	4			4.067		7816.22	1122.19	4		2880.37	240.29	4			4.067		22283.3	1385.72	4		2983.7	808.506	4			4.067		17941.1	1103.48	4		3093.1	803.388	4
4.083		3763.3	1462.24	4		3699.69	1004.94	4			4.083		7982.53	1388.98	4		3258.04	465.572	4			4.083		21649.8	1324.92	4		2360.12	289.379	4			4.083		17858.4	1001.19	4		2728.23	521.325	4
4.1		3746.46	1433.39	4		3703.65	1014.01	4			4.1		7391.06	947.389	4		3070.93	543.342	4			4.1		21674.5	1509.49	4		2764.47	566.692	4			4.1		17931.6	1077.92	4		2508.06	315.375	4
4.117		3687.51	1416.3	4		3721.54	1045.53	4			4.117		8062.2	1686.02	4		2972.85	513.371	4			4.117		22247.5	1367.36	4		3231.56	499.389	4			4.117		17954	1110.04	4		2188.96	479.131	4
4.133		3706.78	1436.73	4		3699.11	1026.68	4			4.133		7860.36	1456.16	4		2697.47	402.136	4			4.133		21902.9	1262.72	4		2352.23	330.281	4			4.133		17804.2	1032.64	4		2254.05	439.611	4
4.15		3690.07	1396.4	4		3552.67	894.391	4			4.15		7954.06	1678.6	4		2723.95	368.581	4			4.15		21695.6	1557.8	4		2541.63	523.571	4			4.15		17857.3	1094.45	4		2497.13	559.344	4
4.167		3732.52	1475.51	4		3921.17	1171.41	4			4.167		7961.77	1842.06	4		3183.37	422.398	4			4.167		21657.1	1432.99	4		2480.98	510.26	4			4.167		17911.8	1016.53	4		2481.31	505.553	4
4.183		3623.73	1416.63	4		3716.47	1075.9	4			4.183		8385.86	1947.17	4		3191.93	430.352	4			4.183		21854.2	1524.92	4		3530.24	844.653	4			4.183		17924.1	1112.08	4		2255.97	455.504	4
4.2		3691.21	1403.8	4		3982.78	1194.15	4			4.2		7867.65	1470.08	4		2874.43	345.021	4			4.2		21851	1600.46	4		1919.39	376.998	4			4.2		17930.8	1111.94	4		2297.3	519.532	4
4.217		3661.83	1433.93	4		3788.82	1115.09	4			4.217		7029.85	849.356	4		3366.29	475.856	4			4.217		21699.2	1544.23	4		2494.56	389.868	4			4.217		17852.3	1076	4		2285.99	505.976	4
4.233		3672.78	1485.38	4		3804	1159.83	4			4.233		7661.87	1467.72	4		3036.85	443.176	4			4.233		22010	1430.54	4		2320.62	321.925	4			4.233		17971.4	1073.82	4		2549.51	563.025	4
4.25		3627.15	1449.66	4		3833.13	1185.44	4			4.25		6848.74	730.166	4		2987.35	394.608	4			4.25		21668.6	1495.08	4		2978.18	712.23	4			4.25		17821.6	1057.34	4		2597.61	644.804	4
4.267		3656.62	1390.71	4		3482.05	862.091	4			4.267		7255.14	1348.43	4		2394.74	286.254	4			4.267		21974.5	1250.2	4		2551.63	308.699	4			4.267		17777.8	1057.47	4		2466.08	390.205	4
4.283		3630.41	1461.06	4		3733.93	1122.53	4			4.283		7601.22	1652.05	4		2673.94	218.373	4			4.283		21832.4	1280.69	4		2290.71	378.518	4			4.283		17765	1027.8	4		2284.96	416.02	4
4.3		3626.92	1449.12	4		3593.48	1019.4	4			4.3		7587.07	1423.59	4		2802.48	396.023	4			4.3		21882.1	1282.06	4		2346.25	347.909	4			4.3		17770.9	1039.12	4		2618.4	539.057	4
4.317		3670.66	1455.84	4		3804.41	1135.22	4			4.317		7327.86	1298.14	4		3253.61	513.556	4			4.317		21930.9	1549.04	4		2436.81	514.824	4			4.317		17913.5	1089.28	4		2458.74	540.463	4
4.333		3588.45	1391.03	4		3616.31	1006.58	4			4.333		7112.73	1085.56	4		3070.36	497.673	4			4.333		21668.1	1443.87	4		2395.22	277.131	4			4.333		17659	1068.25	4		2251.97	370.536	4
4.35		3500.93	1375.15	4		3289.57	866.574	4			4.35		6472.07	637.956	4		2955.46	328.894	4			4.35		21858.9	1364.47	4		2420.89	507.279	4			4.35		17640.3	1081.73	4		2282.63	387.793	4
4.367		3579.65	1421	4		3717.26	1115.8	4			4.367		7356.32	1255.02	4		2977.02	304.095	4			4.367		21733.5	1258.89	4		2516.94	295.468	4			4.367		17716.6	1029.74	4		2112.08	548.093	4
4.383		3478.23	1372.57	4		3526.79	1024.68	4			4.383		7157.36	1069.77	4		3115.49	476.367	4			4.383		22162.6	1281.43	4		2556.3	611.74	4			4.383		17652	1106.53	4		2052.7	419.932	4
4.4		3543.69	1380.34	4		3474.17	954.329	4			4.4		7695.63	1584.36	4		3024.45	432.457	4			4.4		21801	1309.39	4		2757.79	403.645	4			4.4		17572	1052.73	4		2270.22	597.659	4
4.417		3563.02	1404.79	4		3771.58	1151.61	4			4.417		7265.24	1102.48	4		3092.42	477.285	4			4.417		21846.2	1410.8	4		2812	476.485	4			4.417		17767.3	1101.28	4		2380.13	534.073	4
4.433		3542.62	1397.73	4		3575.12	1020.08	4			4.433		7278.21	1517.95	4		2961.11	614.152	4			4.433		21719.4	1615.53	4		2743.62	540.835	4			4.433		17739	1106.39	4		2475.19	466.505	4
4.45		3547.93	1439.58	4		3645.36	1109.08	4			4.45		6691.95	923.069	4		2695.06	245.809	4			4.45		21857.2	1219.36	4		2421.89	383.248	4			4.45		17623.6	1024.26	4		2488.25	584.948	4
4.467		3596.85	1452.99	4		3324.53	854.484	4			4.467		7242.63	1402.1	4		2635.72	264.458	4			4.467		21805.2	1378.38	4		2838.56	682.152	4			4.467		17776.1	1049.91	4		2837.17	688.337	4
4.483		3515.78	1472.31	4		3433.53	1013.98	4			4.483		7167.34	1357.36	4		3373.04	636.06	4			4.483		21057.5	1504.73	4		2547.62	542.192	4			4.483		17605.2	1011.32	4		2603.43	582.1	4
4.5		3523.32	1452.48	4		3750.93	1204.16	4			4.5		7417.7	1467.03	4		2659.64	316.224	4			4.5		21953.6	1505.11	4		2945.05	764.706	4			4.5		17809.9	1117.61	4		2229.79	559.646	4
4.517		3540.58	1440.42	4		3602.66	1064.9	4			4.517		6850.84	985.373	4		2408.53	196.751	4			4.517		21673	1345.27	4		3052.77	445.59	4			4.517		17733.7	1053.65	4		2013.78	450.249	4
4.533		3465.96	1423.09	4		3596.46	1123.83	4			4.533		6540.56	834.08	4		2636.94	186.255	4			4.533		21928.3	1543.03	4		2801.66	314.81	4			4.533		17630.5	1118.88	4		1995.33	475.282	4
4.55		3538.52	1452.43	4		3444.53	1000.56	4			4.55		7182.12	1366.95	4		2511.06	186.406	4			4.55		21178.1	1548.05	4		1912.17	113.49	4			4.55		17618.2	1025.43	4		2086.28	405.308	4
4.567		3407.69	1425.79	4		3783.68	1297.81	4			4.567		6908.8	1184.33	4		2652.39	486.113	4			4.567		21579.3	1404.98	4		2579.95	594.297	4			4.567		17631.5	1063.9	4		2492.7	689.793	4
4.583		3398.26	1383.8	4		3267.86	933.723	4			4.583		6470.06	894.814	4		2860.3	386.639	4			4.583		21416.4	1428.82	4		2763.42	486.217	4			4.583		17450.7	1066.79	4		2807.38	855.204	4
4.6		3443.58	1401.36	4		3452.17	1017.73	4			4.6		7165.88	1366.23	4		3037.97	563.073	4			4.6		21908.8	1304.86	4		2628.21	398.098	4			4.6		17573.3	1085.37	4		2521.26	504.319	4
4.617		3450.74	1449.71	4		3400.9	1022.57	4			4.617		6935.78	1106.35	4		2752.47	452.063	4			4.617		21586.8	1422.79	4		2365.69	429.251	4			4.617		17619.1	1050.11	4		2729.72	432.955	4
4.633		3405.73	1378.19	4		3370.75	974.916	4			4.633		6916.6	1225.46	4		2736.33	423.241	4			4.633		21525.1	1403.39	4		2063.44	213.063	4			4.633		17446.8	1061.98	4		2099.85	484.948	4
4.65		3343.08	1398.08	4		3366.62	1040.79	4			4.65		6981.34	1405.73	4		2750.04	478.661	4			4.65		21366.6	1419.35	4		2668.21	377.59	4			4.65		17460.8	1049.8	4		2160.26	256.134	4
4.667		3348.18	1395.15	4		3495.01	1121.04	4			4.667		6696.3	1100.92	4		2458.12	207.873	4			4.667		21617.7	1377.81	4		2520.09	467.06	4			4.667		17466.1	1056.35	4		2476.59	624.885	4
4.683		3416.55	1379.29	4		3306.95	919.562	4			4.683		6250.99	776.58	4		2577.38	309.594	4			4.683		21615.4	1244.37	4		3022.07	647.813	4			4.683		17402.8	1019.06	4		2445.02	634.98	4
4.7		3347.04	1374.77	4		3498.69	1073.52	4			4.7		7349.75	1592.63	4		2739.17	436.137	4			4.7		21496.6	1506.09	4		2430.44	567.462	4			4.7		17465.4	1103.5	4		2478.72	509.973	4
4.717		3342.78	1433.46	4		3189.05	949.355	4			4.717		6233.12	709.551	4		2461.25	319.071	4			4.717		21493.6	1508.38	4		2469.92	476.257	4			4.717		17539.1	1089.23	4		2126.04	382.011	4
4.733		3346.52	1430.92	4		3317.37	965.467	4			4.733		6149.62	629.655	4		2729.05	356.404	4			4.733		21854.6	1310.83	4		2455.56	422.284	4			4.733		17483.4	1074.25	4		2130.1	375.98	4
4.75		3335.35	1367.21	4		3339.99	985.802	4			4.75		6954.24	1417.64	4		2559.49	408.859	4			4.75		21811.1	1298.91	4		2718.15	380.219	4			4.75		17420	1081.75	4		2635.89	660.723	4
4.767		3311.14	1450.29	4		3516.96	1143.33	4			4.767		6208.38	836.676	4		2509.96	246.819	4			4.767		21504.5	1484.37	4		2864.28	613.683	4			4.767		17479.9	1062.25	4		2423.95	582.903	4
4.783		3322.87	1384.17	4		3515.59	1130.64	4			4.783		5977.59	652.902	4		2892.98	650.58	4			4.783		21555.9	1308.4	4		2273.04	470.023	4			4.783		17384.3	1041.02	4		2111.68	390.999	4
4.8		3339.76	1381.09	4		3446.17	1077.64	4			4.8		7280.79	1875.38	4		2467.58	271.277	4			4.8		21648.3	1425.19	4		2404.52	475.152	4			4.8		17403.6	1085.11	4		2178.26	454.941	4
4.817		3322.11	1397.75	4		3745.16	1292.87	4			4.817		5981.18	680.661	4		2525.15	470.617	4			4.817		21724.3	1423.61	4		2997.25	809.446	4			4.817		17424.4	1086.29	4		2172.47	453.074	4
4.833		3348.2	1434.3	4		3334.59	1023.86	4			4.833		7186.56	1917.06	4		2198.07	209.378	4			4.833		21402.3	1242.04	4		2837.33	528.691	4			4.833		17414.2	1001.6	4		2061.2	398.542	4
4.85		3337.39	1486.59	4		3328.9	1101.9	4			4.85		6268.75	913.87	4		2723.41	588.065	4			4.85		21394.6	1375.7	4		2503.51	439.453	4			4.85		17419.3	1021.16	4		2648.97	770.319	4
4.867		3240.35	1393.71	4		3410.95	1067.98	4			4.867		6343.87	1111.34	4		2514.25	470.752	4			4.867		21667.3	1350.6	4		2410.7	591.526	4			4.867		17376.1	1073.39	4		2317.94	559.168	4
4.883		3231.27	1417.79	4		3263.77	1025.4	4			4.883		6104.82	927.047	4		2482.59	447.23	4			4.883		21783.5	1319.64	4		2545.04	786.102	4			4.883		17454.9	1085.04	4		2196.78	258.412	4
4.9		3234.92	1376.97	4		3186.58	949.907	4			4.9		6938.81	1594.37	4		2228.8	234.96	4			4.9		21491.2	1273.48	4		2700.31	347.451	4			4.9		17314.1	1041.18	4		2138.21	445.854	4
4.917		3314.03	1467.16	4		2997.46	860.731	4			4.917		5900	741.151	4		2490.39	290.207	4			4.917		21528.3	1306.11	4		2094.4	265.658	4			4.917		17395.6	1028.58	4		2330	422.568	4
4.933		3359.47	1446.81	4		3511.61	1118.68	4			4.933		6085.71	1002.14	4		2505.2	589.876	4			4.933		21658.8	1215.2	4		2656.97	477.174	4			4.933		17470.2	1013.34	4		2163.85	466.394	4
4.95		3314.44	1430.21	4		3240.05	965.189	4			4.95		6252.04	1197.53	4		2552.85	497.181	4			4.95		21460.1	1574.57	4		2236.23	421.328	4			4.95		17503.7	1094.59	4		2062.23	412.21	4
4.967		3208.51	1394.78	4		3095.79	876.673	4			4.967		6427.84	1213.15	4		2623.98	444.935	4			4.967		21370.2	1254.55	4		2525.78	574.717	4			4.967		17247.4	1034.62	4		2197.89	542.942	4
4.983		3284.3	1476.11	4		3165.45	990.058	4			4.983		6710.78	1738.69	4		2818.09	706.701	4			4.983		21518.3	1414.43	4		2189.68	536.423	4			4.983		17480.4	1044.73	4		1553.69	511.691	4
5		3261.83	1447.28	4		3094.77	949.594	4			5		6936.4	1941.81	4		2818.92	695.737	4			5		21522.5	1283.4	4		2584.11	660.68	4			5		17387.3	1038.49	4		1702.2	331.682	4

## Sheet: Fig 4B
Figure 4B
		From 4A-a data				From 4A-b data				From 4A-c data				From 4A-d data
Time(min)		Buffer wash: 7R + ParApSM + ParBpSM				Buffer wash: 4R + ParApSM + ParBpSM				Buffer wash: 3R + ParApSM + ParBpSM				Buffer wash: none + ParApSM + ParBpSM
		B/A	SEM	n		B/A	SEM	n		B/A	SEM	n		B/A	SEM	n
0		1.20675	0.0425947	4		0.756387	0.0215389	4		0.616858	0.0174695	4		0.564951	0.0210982	4
0.017		1.1845	0.0620232	4		0.722278	0.0163104	4		0.59012	0.0233628	4		0.55806	0.0205257	4
0.033		1.18052	0.0526751	4		0.708784	0.0270819	4		0.607405	0.0114215	4		0.555446	0.0156125	4
0.05		1.20173	0.0669242	4		0.71008	0.0134569	4		0.57055	0.013646	4		0.522475	0.0179389	4
0.067		1.17996	0.0458227	4		0.715065	0.0376462	4		0.579303	0.00644967	4		0.483288	0.0227412	4
0.083		1.19354	0.0584592	4		0.687922	0.0473723	4		0.565546	0.023064	4		0.428585	0.034067	4
0.1		1.18706	0.0816597	4		0.682598	0.0442303	4		0.55668	0.0203437	4		0.376317	0.0352138	4
0.117		1.16476	0.0619228	4		0.670721	0.0490043	4		0.541361	0.0400007	4		0.35104	0.0442723	4
0.133		1.18569	0.050316	4		0.635513	0.0485963	4		0.50798	0.0441713	4		0.335972	0.0344875	4
0.15		1.18919	0.0623963	4		0.621396	0.0471278	4		0.479192	0.0292396	4		0.32859	0.0313267	4
0.167		1.18573	0.0644284	4		0.669563	0.0638857	4		0.456928	0.0287126	4		0.323627	0.036928	4
0.183		1.18356	0.0735794	4		0.656727	0.0588677	4		0.410832	0.0127914	4		0.29595	0.0409239	4
0.2		1.17015	0.0585487	4		0.621277	0.0667809	4		0.372133	0.0222908	4		0.28731	0.0357771	4
0.217		1.16209	0.0657679	4		0.621751	0.0559445	4		0.37974	0.0212373	4		0.287514	0.026176	4
0.233		1.16587	0.0493236	4		0.624648	0.0611734	4		0.35767	0.00941003	4		0.290099	0.0279702	4
0.25		1.17355	0.0510958	4		0.597761	0.0680911	4		0.338283	0.0130054	4		0.280104	0.0304887	4
0.267		1.16729	0.0464042	4		0.606813	0.0628613	4		0.330752	0.00651202	4		0.263141	0.0333126	4
0.283		1.15976	0.0652402	4		0.574982	0.0634959	4		0.32892	0.00616545	4		0.260585	0.0370185	4
0.3		1.16989	0.0535852	4		0.594781	0.0627008	4		0.319683	0.00774393	4		0.264308	0.0340914	4
0.317		1.178	0.0459304	4		0.567089	0.0549645	4		0.285966	0.00484235	4		0.270824	0.0296213	4
0.333		1.18494	0.0434895	4		0.570827	0.0633794	4		0.309984	0.00681951	4		0.269933	0.0292598	4
0.35		1.16724	0.0449766	4		0.57615	0.069951	4		0.315867	0.00896447	4		0.258979	0.0313441	4
0.367		1.15749	0.0601583	4		0.57993	0.051868	4		0.308666	0.00360831	4		0.252164	0.0302924	4
0.383		1.14214	0.0596349	4		0.549272	0.0516789	4		0.271705	0.00481088	4		0.235084	0.0316983	4
0.4		1.15035	0.0627557	4		0.514942	0.0552232	4		0.295967	0.0152822	4		0.251476	0.0184362	4
0.417		1.13457	0.0647701	4		0.525894	0.0485301	4		0.273921	0.00713818	4		0.237159	0.0320824	4
0.433		1.14653	0.059407	4		0.553308	0.0536055	4		0.286416	0.0127267	4		0.23175	0.023459	4
0.45		1.13841	0.0687584	4		0.537514	0.0595363	4		0.264626	0.00140169	4		0.232213	0.0262012	4
0.467		1.14513	0.0616338	4		0.517527	0.0547455	4		0.253911	0.0071125	4		0.229381	0.0270147	4
0.483		1.15039	0.0539652	4		0.543553	0.0620434	4		0.264728	0.00419726	4		0.228035	0.0246397	4
0.5		1.15223	0.0525374	4		0.53406	0.059446	4		0.243321	0.0100009	4		0.223221	0.0299428	4
0.517		1.15241	0.0669785	4		0.5067	0.0659703	4		0.250895	0.00618388	4		0.219567	0.0253954	4
0.533		1.13225	0.0650521	4		0.525646	0.0567876	4		0.250832	0.00465618	4		0.216138	0.0239798	4
0.55		1.14935	0.0592558	4		0.500106	0.0633239	4		0.244807	0.00906324	4		0.21993	0.0281189	4
0.567		1.15733	0.0580198	4		0.491777	0.0608624	4		0.233284	0.0105199	4		0.227084	0.0185841	4
0.583		1.1463	0.0642688	4		0.498767	0.0561016	4		0.231285	0.0111522	4		0.230317	0.0221163	4
0.6		1.15258	0.0655789	4		0.502799	0.0702394	4		0.225971	0.00128164	4		0.220318	0.0296852	4
0.617		1.16518	0.0488053	4		0.489861	0.0737582	4		0.220053	0.00738724	4		0.231325	0.0248802	4
0.633		1.16657	0.0562321	4		0.482018	0.0669752	4		0.234792	0.00232343	4		0.210588	0.0321499	4
0.65		1.16944	0.053841	4		0.469529	0.0638447	4		0.203833	0.00936573	4		0.226561	0.0211949	4
0.667		1.13937	0.0660872	4		0.465977	0.067416	4		0.21857	0.00501859	4		0.210909	0.0361328	4
0.683		1.14566	0.0592181	4		0.489303	0.0590461	4		0.230498	0.00335892	4		0.200151	0.0288323	4
0.7		1.15366	0.0521202	4		0.46819	0.0521087	4		0.211147	0.0135714	4		0.197257	0.024919	4
0.717		1.16141	0.046956	4		0.463862	0.066104	4		0.18301	0.0118341	4		0.202049	0.0321699	4
0.733		1.12739	0.0687501	4		0.473012	0.0733115	4		0.203432	0.00522416	4		0.207292	0.0172997	4
0.75		1.12801	0.0680169	4		0.498455	0.0715262	4		0.2199	0.00445216	4		0.199036	0.0264433	4
0.767		1.13197	0.0648075	4		0.460699	0.0702913	4		0.204414	0.0138927	4		0.20342	0.0158112	4
0.783		1.14043	0.0608538	4		0.459967	0.0477287	4		0.202762	0.00712975	4		0.205318	0.0266092	4
0.8		1.14623	0.0584575	4		0.470423	0.0607064	4		0.181844	0.00368847	4		0.213284	0.0242871	4
0.817		1.15202	0.0539381	4		0.449992	0.0675422	4		0.196966	0.00664203	4		0.214202	0.0279847	4
0.833		1.1623	0.0480684	4		0.48291	0.0658302	4		0.214017	0.0147328	4		0.211312	0.0231376	4
0.85		1.15934	0.0514044	4		0.472834	0.0604836	4		0.198374	0.0108537	4		0.198867	0.0297921	4
0.867		1.15337	0.05411	4		0.476214	0.0688813	4		0.189404	0.0082499	4		0.201795	0.025327	4
0.883		1.17511	0.0394253	4		0.449659	0.0751602	4		0.195271	0.00827078	4		0.192435	0.0378801	4
0.9		1.1385	0.0606947	4		0.442326	0.0561199	4		0.182856	0.00178119	4		0.183618	0.0318063	4
0.917		1.12458	0.0707638	4		0.447865	0.0593283	4		0.21606	0.00662136	4		0.198171	0.0176867	4
0.933		1.12614	0.0687091	4		0.486796	0.0702117	4		0.205998	0.00454583	4		0.193928	0.0227996	4
0.95		1.13581	0.0660619	4		0.435946	0.068365	4		0.202252	0.00851357	4		0.191065	0.0215504	4
0.967		1.12734	0.0701253	4		0.456491	0.0601518	4		0.181432	0.00659338	4		0.188654	0.0248714	4
0.983		1.11365	0.0787025	4		0.452255	0.0671446	4		0.183599	0.00536149	4		0.189169	0.0198429	4
1		1.14246	0.062581	4		0.45825	0.0707798	4		0.184879	0.01232	4		0.197136	0.0255343	4
1.017		1.14369	0.0612376	4		0.428494	0.0675157	4		0.1927	0.00703495	4		0.216712	0.018639	4
1.033		1.1591	0.0499374	4		0.43272	0.0601207	4		0.191025	0.00723223	4		0.204622	0.0320528	4
1.05		1.11877	0.0746694	4		0.439276	0.0694226	4		0.165998	0.0012455	4		0.202249	0.0230555	4
1.067		1.15108	0.0574693	4		0.437156	0.0653923	4		0.160109	0.0106079	4		0.194033	0.0253687	4
1.083		1.13198	0.0693304	4		0.431857	0.0717987	4		0.186351	0.00447879	4		0.186729	0.0247516	4
1.1		1.1195	0.0773368	4		0.432236	0.0742691	4		0.188293	0.0126849	4		0.183594	0.0265936	4
1.117		1.13143	0.0687722	4		0.433211	0.0492401	4		0.162109	0.00739065	4		0.189533	0.0228814	4
1.133		1.12761	0.0712261	4		0.439213	0.0599704	4		0.162696	0.00620196	4		0.206911	0.0228717	4
1.15		1.15105	0.0653726	4		0.422517	0.0611543	4		0.173756	0.00507522	4		0.203529	0.0252398	4
1.167		1.13578	0.0719696	4		0.422412	0.0541573	4		0.165204	0.00794349	4		0.189802	0.0246886	4
1.183		1.17513	0.0422565	4		0.444001	0.0551185	4		0.169849	0.0118396	4		0.197805	0.022247	4
1.2		1.16753	0.050387	4		0.422564	0.0550701	4		0.160356	0.00168966	4		0.198936	0.031143	4
1.217		1.15578	0.05464	4		0.448071	0.0690292	4		0.17173	0.00869155	4		0.186383	0.0270833	4
1.233		1.11358	0.0859065	4		0.401107	0.0703829	4		0.181708	0.0131538	4		0.181679	0.0270846	4
1.25		1.15503	0.0551979	4		0.411902	0.0527065	4		0.178816	0.0124687	4		0.184415	0.028491	4
1.267		1.14578	0.0681916	4		0.411129	0.0668921	4		0.156993	0.0115995	4		0.168491	0.0296549	4
1.283		1.13888	0.0769234	4		0.400297	0.0631098	4		0.165769	0.00445794	4		0.186518	0.0162468	4
1.3		1.13544	0.0723454	4		0.38149	0.0841568	4		0.194401	0.020741	4		0.192591	0.0256867	4
1.317		1.15189	0.0605566	4		0.412722	0.0667449	4		0.176719	0.0185924	4		0.211134	0.0231351	4
1.333		1.12974	0.071625	4		0.387108	0.071054	4		0.179008	0.0114155	4		0.160692	0.0437491	4
1.35		1.13354	0.0701977	4		0.402729	0.0764846	4		0.162566	0.0228981	4		0.177416	0.0185337	4
1.367		1.13086	0.0737503	4		0.412216	0.0698035	4		0.16348	0.00768452	4		0.181489	0.0310428	4
1.383		1.14694	0.06311	4		0.378411	0.0637176	4		0.17921	0.0162658	4		0.170692	0.0264319	4
1.4		1.12544	0.0777279	4		0.385029	0.0762356	4		0.173033	0.00885898	4		0.186815	0.023158	4
1.417		1.14263	0.0642338	4		0.416817	0.0598401	4		0.160198	0.0135173	4		0.177834	0.0342225	4
1.433		1.1417	0.0720057	4		0.409554	0.0560572	4		0.173417	0.0110472	4		0.174829	0.0249292	4
1.45		1.1651	0.0543003	4		0.389913	0.0651496	4		0.156064	0.00252023	4		0.185	0.0227265	4
1.467		1.15366	0.0583791	4		0.409825	0.0517508	4		0.157585	0.00305612	4		0.185726	0.0255045	4
1.483		1.12935	0.0751451	4		0.392913	0.0674173	4		0.161691	0.00445208	4		0.178637	0.0236733	4
1.5		1.12713	0.0740306	4		0.391813	0.0589908	4		0.163902	0.00392144	4		0.172757	0.021954	4
1.517		1.15618	0.0593765	4		0.407875	0.0536401	4		0.150182	0.00434143	4		0.180191	0.0196103	4
1.533		1.15284	0.0625972	4		0.385695	0.059879	4		0.158981	0.00973094	4		0.195335	0.0273247	4
1.55		1.13127	0.0759764	4		0.407897	0.0437366	4		0.14925	0.00687377	4		0.208905	0.0284245	4
1.567		1.12434	0.0816833	4		0.387257	0.0643694	4		0.14573	0.00584319	4		0.203306	0.0283638	4
1.583		1.14418	0.0653191	4		0.417811	0.0540379	4		0.144624	0.00284947	4		0.189899	0.0258953	4
1.6		1.14321	0.0730861	4		0.400752	0.0592423	4		0.166482	0.0141044	4		0.165488	0.0299258	4
1.617		1.14604	0.0679274	4		0.397769	0.0621129	4		0.137646	0.00322704	4		0.180213	0.0243219	4
1.633		1.14115	0.0633653	4		0.414794	0.0616869	4		0.147047	0.0136477	4		0.17684	0.0346749	4
1.65		1.11125	0.0849655	4		0.401437	0.0571412	4		0.142637	0.0132182	4		0.163769	0.0248626	4
1.667		1.13343	0.0712161	4		0.408283	0.0577654	4		0.143283	0.015199	4		0.185742	0.0196715	4
1.683		1.13941	0.0704396	4		0.399735	0.0578835	4		0.135289	0.011983	4		0.192976	0.0207895	4
1.7		1.11533	0.0834297	4		0.401905	0.0558699	4		0.168036	0.0113367	4		0.187175	0.0189021	4
1.717		1.11289	0.0920496	4		0.393945	0.0555193	4		0.155747	0.00816325	4		0.188633	0.018943	4
1.733		1.1341	0.0736656	4		0.446689	0.0300729	4		0.167425	0.00678666	4		0.187932	0.0244827	4
1.75		1.1395	0.0714154	4		0.404035	0.0338686	4		0.149902	0.00732089	4		0.176309	0.0268889	4
1.767		1.10958	0.0893902	4		0.391498	0.059033	4		0.135491	0.00184572	4		0.168599	0.0201447	4
1.783		1.13217	0.0745105	4		0.396382	0.0478654	4		0.145245	0.0133175	4		0.167136	0.0241451	4
1.8		1.15815	0.0552413	4		0.422387	0.0437211	4		0.159816	0.00742055	4		0.169457	0.0270505	4
1.817		1.11479	0.0868416	4		0.396526	0.045702	4		0.144718	0.00757717	4		0.154041	0.027325	4
1.833		1.14577	0.0661997	4		0.403225	0.0525265	4		0.141292	0.0151368	4		0.162984	0.0206506	4
1.85		1.09513	0.0988359	4		0.404357	0.0403364	4		0.155855	0.0103472	4		0.155358	0.0266735	4
1.867		1.17911	0.046616	4		0.409613	0.0439597	4		0.157495	0.00274532	4		0.171569	0.0244335	4
1.883		1.16611	0.0585319	4		0.400394	0.0400981	4		0.134514	0.0036077	4		0.17902	0.0151969	4
1.9		1.15674	0.0660874	4		0.384007	0.0412065	4		0.164083	0.00785314	4		0.187346	0.0232901	4
1.917		1.11109	0.0863582	4		0.397894	0.0328242	4		0.143762	0.00840268	4		0.19441	0.0251077	4
1.933		1.16388	0.0585208	4		0.392005	0.0512137	4		0.145176	0.00492651	4		0.164245	0.039757	4
1.95		1.13797	0.0725571	4		0.379945	0.0489615	4		0.130312	0.0130791	4		0.169126	0.0215312	4
1.967		1.1534	0.0659664	4		0.407616	0.0271998	4		0.14397	0.0126637	4		0.183174	0.0221553	4
1.983		1.10918	0.0931797	4		0.40121	0.0434338	4		0.120898	0.00365696	4		0.161536	0.0268065	4
2		1.12919	0.0760056	4		0.394627	0.0569674	4		0.141866	0.0107802	4		0.174749	0.0238903	4
2.017		1.13224	0.0769995	4		0.358267	0.0498834	4		0.151145	0.0164126	4		0.16309	0.0264478	4
2.033		1.12477	0.0920208	4		0.372925	0.0462401	4		0.156311	0.00675391	4		0.15232	0.0249793	4
2.05		1.13533	0.0741204	4		0.409577	0.0454545	4		0.132646	0.0133942	4		0.181782	0.0157987	4
2.067		1.11697	0.0911751	4		0.398952	0.0436149	4		0.133455	0.00967404	4		0.16822	0.0287487	4
2.083		1.14858	0.0840496	4		0.413879	0.0449883	4		0.139924	0.0167032	4		0.185153	0.0132848	4
2.1		1.14239	0.0878496	4		0.415547	0.0289868	4		0.159385	0.0152015	4		0.188202	0.0307792	4
2.117		1.1703	0.0544452	4		0.389869	0.0566654	4		0.159603	0.00758626	4		0.198602	0.030116	4
2.133		1.11251	0.0869521	4		0.403864	0.0358888	4		0.148071	0.0050382	4		0.15753	0.0405493	4
2.15		1.11306	0.0985973	4		0.385	0.0446995	4		0.157219	0.0175397	4		0.143687	0.0162726	4
2.167		1.14737	0.0723939	4		0.386369	0.0498593	4		0.138294	0.00440697	4		0.153052	0.0289164	4
2.183		1.14641	0.069994	4		0.386588	0.043576	4		0.159794	0.016683	4		0.169892	0.0229637	4
2.2		1.14958	0.0629549	4		0.359848	0.0441684	4		0.136696	0.00379612	4		0.155354	0.0323795	4
2.217		1.13768	0.0731713	4		0.396248	0.0394279	4		0.14804	0.00841705	4		0.1599	0.0175614	4
2.233		1.14228	0.068545	4		0.399739	0.0245195	4		0.122258	0.00810654	4		0.160837	0.022554	4
2.25		1.11695	0.0890581	4		0.389593	0.0522003	4		0.164507	0.0169943	4		0.155075	0.0179981	4
2.267		1.12189	0.0848124	4		0.359541	0.0660804	4		0.122651	0.00817371	4		0.166362	0.0192332	4
2.283		1.12711	0.084852	4		0.367601	0.0487078	4		0.117658	0.0106413	4		0.176493	0.0239435	4
2.3		1.13478	0.0777051	4		0.390185	0.0380976	4		0.1333	0.0161796	4		0.180598	0.0252119	4
2.317		1.13782	0.0779494	4		0.340891	0.0530529	4		0.125966	0.0168677	4		0.177935	0.0244064	4
2.333		1.14708	0.0685239	4		0.417796	0.0256556	4		0.12834	0.0200918	4		0.174345	0.0290258	4
2.35		1.1179	0.0867475	4		0.420863	0.0316678	4		0.128074	0.0124436	4		0.177714	0.0286386	4
2.367		1.13109	0.0819252	4		0.401677	0.0384796	4		0.141278	0.0147955	4		0.164893	0.0310856	4
2.383		1.12809	0.0882544	4		0.393576	0.0404753	4		0.11616	0.0128127	4		0.181371	0.0319655	4
2.4		1.11677	0.0848741	4		0.408661	0.0453123	4		0.142962	0.0143151	4		0.166468	0.0322402	4
2.417		1.12614	0.0795222	4		0.416441	0.0369612	4		0.143809	0.0140632	4		0.168423	0.0259078	4
2.433		1.15122	0.0716886	4		0.387246	0.0410009	4		0.158811	0.0118567	4		0.160749	0.0250394	4
2.45		1.12455	0.095437	4		0.401107	0.0290047	4		0.140311	0.0147972	4		0.159419	0.02602	4
2.467		1.12408	0.086374	4		0.408699	0.0443718	4		0.14067	0.0112388	4		0.13736	0.0370307	4
2.483		1.13202	0.0778125	4		0.409114	0.0339116	4		0.152753	0.00317784	4		0.142259	0.0307411	4
2.5		1.09472	0.0968997	4		0.412822	0.0361255	4		0.168939	0.0109144	4		0.13887	0.0297468	4
2.517		1.10985	0.0931096	4		0.429618	0.0230488	4		0.144871	0.0100023	4		0.149168	0.0204285	4
2.533		1.14503	0.0780216	4		0.397138	0.0350971	4		0.151393	0.0214582	4		0.178261	0.0308278	4
2.55		1.13686	0.0965947	4		0.394549	0.0315064	4		0.142313	0.0091146	4		0.161029	0.0314965	4
2.567		1.12361	0.0845865	4		0.388829	0.0347341	4		0.143985	0.0133806	4		0.149484	0.0229811	4
2.583		1.08823	0.100992	4		0.392238	0.0388371	4		0.139507	0.00964643	4		0.132771	0.0278318	4
2.6		1.12312	0.0950474	4		0.423355	0.0391312	4		0.153004	0.0194709	4		0.145667	0.0229161	4
2.617		1.10558	0.0968311	4		0.370155	0.0423602	4		0.144658	0.0168412	4		0.153793	0.0296862	4
2.633		1.14523	0.080829	4		0.408001	0.0313408	4		0.134382	0.0118714	4		0.145789	0.0268735	4
2.65		1.12285	0.0892102	4		0.406768	0.0422761	4		0.147595	0.0197624	4		0.129927	0.0295773	4
2.667		1.13535	0.105471	4		0.389341	0.0429709	4		0.149195	0.0183468	4		0.133431	0.022126	4
2.683		1.10964	0.0919447	4		0.378498	0.0382151	4		0.140671	0.0123482	4		0.152075	0.0340042	4
2.7		1.148	0.0780811	4		0.406586	0.0466665	4		0.130513	0.00819841	4		0.14886	0.0222711	4
2.717		1.12736	0.0835545	4		0.389947	0.0438647	4		0.136226	0.00725873	4		0.145178	0.0228729	4
2.733		1.10106	0.106812	4		0.427667	0.0265261	4		0.145763	0.0182342	4		0.148831	0.0174255	4
2.75		1.10634	0.115838	4		0.40894	0.0247913	4		0.157005	0.0173236	4		0.147552	0.0264368	4
2.767		1.11059	0.102183	4		0.440522	0.0148468	4		0.120455	0.00972216	4		0.137192	0.0253136	4
2.783		1.12318	0.103902	4		0.444207	0.0194697	4		0.127962	0.0118544	4		0.158656	0.0300766	4
2.8		1.10784	0.0981341	4		0.418842	0.0204515	4		0.141043	0.00631377	4		0.160179	0.0207654	4
2.817		1.13186	0.109658	4		0.414313	0.0331327	4		0.156577	0.0252154	4		0.139474	0.0267627	4
2.833		1.12939	0.107869	4		0.400863	0.0259929	4		0.126492	0.0122117	4		0.135546	0.0197534	4
2.85		1.16077	0.0880315	4		0.405677	0.0197619	4		0.139593	0.00947885	4		0.16082	0.0300486	4
2.867		1.1173	0.096727	4		0.448668	0.0410772	4		0.143604	0.00606325	4		0.14882	0.0287111	4
2.883		1.14173	0.104747	4		0.421499	0.00850811	4		0.155837	0.0103768	4		0.155434	0.0282602	4
2.9		1.16584	0.0975177	4		0.446419	0.0263844	4		0.129739	0.0179704	4		0.154213	0.0273903	4
2.917		1.09088	0.10405	4		0.430519	0.0253992	4		0.137153	0.00661064	4		0.143852	0.0308834	4
2.933		1.1308	0.103589	4		0.437649	0.0324904	4		0.133156	0.0146795	4		0.141797	0.02491	4
2.95		1.14136	0.0892582	4		0.421263	0.0225589	4		0.129747	0.00638588	4		0.156989	0.0240198	4
2.967		1.11887	0.091402	4		0.37926	0.0280027	4		0.107331	0.0121061	4		0.169803	0.0293	4
2.983		1.09236	0.115111	4		0.412426	0.0353288	4		0.12577	0.00897545	4		0.151009	0.0319855	4
3		1.13131	0.103699	4		0.426659	0.0254207	4		0.133201	0.0129249	4		0.144535	0.0284262	4
3.017		1.14562	0.0917837	4		0.404715	0.0307469	4		0.11751	0.00927331	4		0.154559	0.0259383	4
3.033		1.15252	0.0781779	4		0.406102	0.0274146	4		0.134965	0.0138967	4		0.159604	0.0269282	4
3.05		1.1381	0.0907172	4		0.415558	0.0217425	4		0.125434	0.0128855	4		0.138589	0.0320382	4
3.067		1.16266	0.0878276	4		0.434717	0.0291393	4		0.12886	0.0169349	4		0.148206	0.0218008	4
3.083		1.13092	0.0974126	4		0.413236	0.0237037	4		0.131616	0.0134612	4		0.159653	0.030655	4
3.1		1.12717	0.122322	4		0.425985	0.0393274	4		0.135231	0.0168446	4		0.16573	0.0252302	4
3.117		1.15963	0.0693131	4		0.442839	0.0222204	4		0.130758	0.0107672	4		0.147899	0.0302428	4
3.133		1.08612	0.110594	4		0.378664	0.0353013	4		0.124548	0.0154438	4		0.135904	0.0219912	4
3.15		1.16362	0.109537	4		0.407513	0.0212727	4		0.120339	0.00712991	4		0.152134	0.0271732	4
3.167		1.10845	0.101879	4		0.426995	0.027042	4		0.127135	0.00753789	4		0.148368	0.0271966	4
3.183		1.17954	0.0974488	4		0.413822	0.0238336	4		0.134957	0.01038	4		0.152407	0.0292067	4
3.2		1.15495	0.0849612	4		0.384754	0.0354149	4		0.121737	0.0156546	4		0.157821	0.0284775	4
3.217		1.12756	0.0860067	4		0.409184	0.0209999	4		0.108169	0.00517828	4		0.150655	0.031148	4
3.233		1.14011	0.0964104	4		0.375492	0.0510446	4		0.138996	0.017887	4		0.148586	0.0254376	4
3.25		1.13575	0.0942475	4		0.376649	0.0502979	4		0.13923	0.0137055	4		0.146253	0.0201236	4
3.267		1.16068	0.113997	4		0.407754	0.0331104	4		0.126521	0.0232361	4		0.136104	0.0298227	4
3.283		1.11327	0.12791	4		0.426449	0.0238381	4		0.120442	0.0115737	4		0.119753	0.0385407	4
3.3		1.1782	0.102268	4		0.412966	0.0270614	4		0.143396	0.0157607	4		0.137838	0.0301962	4
3.317		1.12862	0.127049	4		0.43847	0.0287149	4		0.127519	0.00568818	4		0.135421	0.0359479	4
3.333		1.15363	0.087743	4		0.449297	0.0338854	4		0.122372	0.00955097	4		0.149777	0.0256901	4
3.35		1.11792	0.124141	4		0.380847	0.0314309	4		0.140579	0.0114369	4		0.149033	0.0297007	4
3.367		1.13751	0.0903073	4		0.398944	0.0415836	4		0.129709	0.0196224	4		0.15099	0.028167	4
3.383		1.16007	0.127466	4		0.411004	0.0203904	4		0.123967	0.00843761	4		0.146021	0.0255691	4
3.4		1.13199	0.110856	4		0.37436	0.038465	4		0.135222	0.0161088	4		0.170738	0.0289281	4
3.417		1.20453	0.110805	4		0.43064	0.0184576	4		0.120957	0.0127589	4		0.170379	0.0316924	4
3.433		1.13672	0.0891612	4		0.452196	0.0323435	4		0.115514	0.0136652	4		0.171394	0.023961	4
3.45		1.15205	0.115241	4		0.4304	0.0328581	4		0.118305	0.0142532	4		0.164359	0.0288711	4
3.467		1.13211	0.110213	4		0.386073	0.0558511	4		0.1442	0.0277373	4		0.158052	0.0212433	4
3.483		1.17829	0.0921422	4		0.405811	0.0322618	4		0.106015	0.01412	4		0.154454	0.0250202	4
3.5		1.07835	0.118981	4		0.399217	0.0405146	4		0.135711	0.0236938	4		0.126863	0.0282024	4
3.517		1.15847	0.0910077	4		0.407817	0.0377397	4		0.125803	0.00817449	4		0.120197	0.0262122	4
3.533		1.11976	0.128726	4		0.387549	0.0472047	4		0.121593	0.0122078	4		0.136371	0.0256966	4
3.55		1.14269	0.129342	4		0.406312	0.0340471	4		0.132853	0.00723685	4		0.14661	0.0351092	4
3.567		1.15552	0.094736	4		0.426672	0.0224361	4		0.122586	0.0150244	4		0.138951	0.0261949	4
3.583		1.12759	0.0920597	4		0.398115	0.0322697	4		0.117751	0.0100399	4		0.143479	0.0231486	4
3.6		1.12826	0.126533	4		0.460326	0.0234705	4		0.115094	0.0116284	4		0.151021	0.028212	4
3.617		1.1397	0.108853	4		0.412993	0.0294412	4		0.115389	0.00846027	4		0.151306	0.021859	4
3.633		1.14227	0.108325	4		0.407079	0.0356188	4		0.127323	0.00482321	4		0.150551	0.0273118	4
3.65		1.17158	0.121731	4		0.378054	0.0474927	4		0.118565	0.0135051	4		0.163052	0.0296006	4
3.667		1.15576	0.103048	4		0.38546	0.046421	4		0.121884	0.0207774	4		0.154933	0.0309781	4
3.683		1.11119	0.118435	4		0.414615	0.0380017	4		0.111848	0.00571483	4		0.150463	0.0280775	4
3.7		1.16702	0.131295	4		0.36503	0.059541	4		0.119889	0.0160005	4		0.14918	0.0308119	4
3.717		1.142	0.154874	4		0.389313	0.0445811	4		0.110703	0.0188792	4		0.160033	0.0272827	4
3.733		1.14788	0.10112	4		0.431789	0.0465448	4		0.116334	0.0127859	4		0.165806	0.03179	4
3.75		1.12413	0.141334	4		0.415466	0.0339363	4		0.118158	0.0120544	4		0.173108	0.0229411	4
3.767		1.16363	0.148814	4		0.359213	0.0451733	4		0.123484	0.0166468	4		0.159613	0.0212346	4
3.783		1.0941	0.168437	4		0.379338	0.0369103	4		0.121375	0.0113581	4		0.147858	0.0205851	4
3.8		1.11769	0.13157	4		0.358115	0.0403569	4		0.115498	0.0123437	4		0.15307	0.0192358	4
3.817		1.09669	0.124059	4		0.389548	0.0152874	4		0.120294	0.0125572	4		0.136029	0.0257849	4
3.833		1.12181	0.124391	4		0.425537	0.0256853	4		0.118483	0.0230781	4		0.137862	0.0227055	4
3.85		1.11175	0.1326	4		0.380363	0.0408409	4		0.129832	0.0222497	4		0.137429	0.0292689	4
3.867		1.14019	0.1135	4		0.391229	0.0435433	4		0.112056	0.0151851	4		0.133653	0.025973	4
3.883		1.14288	0.118127	4		0.432943	0.040887	4		0.112571	0.0234148	4		0.123415	0.0239098	4
3.9		1.11778	0.137898	4		0.390777	0.0335851	4		0.137945	0.02347	4		0.134676	0.0244055	4
3.917		1.11982	0.127276	4		0.422687	0.0181666	4		0.123956	0.0202062	4		0.148458	0.0294793	4
3.933		1.17025	0.0891902	4		0.36442	0.0432575	4		0.110947	0.0199385	4		0.156837	0.0280728	4
3.95		1.14907	0.124329	4		0.391612	0.0133926	4		0.132444	0.0151961	4		0.160977	0.0252563	4
3.967		1.09295	0.106316	4		0.408597	0.03176	4		0.117131	0.01794	4		0.154075	0.0264065	4
3.983		1.13823	0.119226	4		0.435982	0.0216264	4		0.128125	0.0164369	4		0.152806	0.0235286	4
4		1.1283	0.102778	4		0.429328	0.0128041	4		0.103525	0.020233	4		0.146407	0.0225625	4
4.017		1.12439	0.134671	4		0.412242	0.0434545	4		0.113557	0.00883273	4		0.127189	0.0254264	4
4.033		1.12181	0.111583	4		0.39943	0.0448837	4		0.113993	0.022961	4		0.15107	0.0225779	4
4.05		1.17141	0.125679	4		0.404868	0.0493832	4		0.118564	0.0181966	4		0.1559	0.0344149	4
4.067		1.12665	0.130472	4		0.385881	0.0465248	4		0.129016	0.0274096	4		0.171071	0.0394093	4
4.083		1.11582	0.137657	4		0.414813	0.0240121	4		0.108282	0.00929798	4		0.156218	0.0347532	4
4.1		1.11018	0.120987	4		0.412236	0.0367065	4		0.124172	0.0172152	4		0.142468	0.0225721	4
4.117		1.12733	0.123107	4		0.384165	0.0492422	4		0.143586	0.0169914	4		0.125455	0.0307682	4
4.133		1.11305	0.0994577	4		0.358102	0.048714	4		0.106093	0.00912749	4		0.126103	0.0214328	4
4.15		1.09579	0.129446	4		0.366106	0.0533347	4		0.114143	0.0166841	4		0.141372	0.0323743	4
4.167		1.15437	0.0950554	4		0.424382	0.0445983	4		0.111705	0.0163283	4		0.141414	0.0321184	4
4.183		1.14403	0.126434	4		0.403115	0.0347233	4		0.156144	0.0272775	4		0.129484	0.0304551	4
4.2		1.18066	0.135147	4		0.392634	0.0602024	4		0.087269	0.0163536	4		0.130977	0.0321614	4
4.217		1.14018	0.0953596	4		0.47489	0.0188493	4		0.113033	0.00978592	4		0.130748	0.0315691	4
4.233		1.15036	0.111597	4		0.406846	0.0225696	4		0.104149	0.00857195	4		0.142992	0.0316384	4
4.25		1.17162	0.13818	4		0.434416	0.0212958	4		0.132809	0.0225538	4		0.147122	0.0368578	4
4.267		1.08745	0.127011	4		0.355756	0.063702	4		0.114929	0.00709356	4		0.14072	0.0247745	4
4.283		1.14726	0.119401	4		0.384573	0.0558253	4		0.103282	0.0119596	4		0.131544	0.0278656	4
4.3		1.12816	0.145239	4		0.380585	0.0330775	4		0.105931	0.0110354	4		0.147345	0.0279333	4
4.317		1.14582	0.104289	4		0.447822	0.0189369	4		0.108513	0.0178995	4		0.140274	0.0341325	4
4.333		1.12301	0.102898	4		0.431576	0.0182752	4		0.110239	0.0100141	4		0.130106	0.0249137	4
4.35		1.08801	0.147452	4		0.4552	0.0167159	4		0.108676	0.0191312	4		0.132492	0.0266493	4
4.367		1.14842	0.108942	4		0.419785	0.0362305	4		0.115028	0.0090984	4		0.122417	0.0341944	4
4.383		1.14441	0.150484	4		0.436555	0.0214333	4		0.111955	0.0204138	4		0.117172	0.0237487	4
4.4		1.10869	0.126397	4		0.407938	0.0297351	4		0.124955	0.0124982	4		0.129932	0.0336219	4
4.417		1.15453	0.0851077	4		0.426728	0.0197689	4		0.126414	0.0141528	4		0.137075	0.0341857	4
4.433		1.13156	0.119324	4		0.413747	0.0364441	4		0.123591	0.0182306	4		0.141354	0.0282221	4
4.45		1.14101	0.100601	4		0.414914	0.0416362	4		0.110458	0.0166735	4		0.142665	0.0343116	4
4.467		1.07928	0.136234	4		0.385524	0.0420361	4		0.126327	0.0238649	4		0.158044	0.0328965	4
4.483		1.11527	0.116621	4		0.471001	0.0157751	4		0.117548	0.0162135	4		0.149423	0.0347228	4
4.5		1.16752	0.0948508	4		0.377184	0.0422532	4		0.129286	0.0258858	4		0.127492	0.0341636	4
4.517		1.14721	0.132067	4		0.369408	0.0500502	4		0.138808	0.011655	4		0.116835	0.0297964	4
4.533		1.1551	0.118968	4		0.413926	0.0319393	4		0.126779	0.00587693	4		0.115415	0.0295285	4
4.55		1.11485	0.136827	4		0.372805	0.0428891	4		0.0912658	0.00681254	4		0.121288	0.027328	4
4.567		1.19351	0.0780638	4		0.389751	0.0409571	4		0.115882	0.0188614	4		0.141378	0.0372369	4
4.583		1.10227	0.129961	4		0.444469	0.019368	4		0.126512	0.0146985	4		0.159705	0.0440754	4
4.6		1.12859	0.114405	4		0.42564	0.0157492	4		0.118315	0.0116694	4		0.14858	0.037111	4
4.617		1.12415	0.124019	4		0.399458	0.0248187	4		0.10871	0.0181465	4		0.154433	0.0205916	4
4.633		1.12517	0.130702	4		0.401087	0.0139466	4		0.0957507	0.00764268	4		0.125221	0.0340027	4
4.65		1.1408	0.133758	4		0.399926	0.014263	4		0.123246	0.0100033	4		0.125144	0.0166603	4
4.667		1.16519	0.132655	4		0.382469	0.0327083	4		0.114233	0.014909	4		0.141404	0.0330293	4
4.683		1.10495	0.122262	4		0.415672	0.0331285	4		0.13628	0.0214883	4		0.141591	0.0365308	4
4.7		1.1579	0.0991611	4		0.384975	0.0197808	4		0.110105	0.0212401	4		0.143556	0.0306283	4
4.717		1.11183	0.143629	4		0.395048	0.019408	4		0.112111	0.0136973	4		0.124173	0.0266668	4
4.733		1.15519	0.132042	4		0.441462	0.0197914	4		0.110412	0.0132453	4		0.124982	0.0264379	4
4.75		1.12711	0.106784	4		0.37734	0.0172836	4		0.123732	0.013991	4		0.151086	0.0352363	4
4.767		1.21389	0.144937	4		0.411804	0.0206294	4		0.129319	0.0200403	4		0.141247	0.0363342	4
4.783		1.16778	0.105262	4		0.473235	0.0634096	4		0.103033	0.0170114	4		0.123427	0.0249892	4
4.8		1.1592	0.140046	4		0.371503	0.0433899	4		0.108496	0.0151278	4		0.126324	0.0270472	4
4.817		1.21795	0.110779	4		0.419047	0.0432292	4		0.132785	0.0280777	4		0.126833	0.0287129	4
4.833		1.13219	0.11226	4		0.349522	0.0634741	4		0.129923	0.0172136	4		0.121326	0.027219	4
4.85		1.14019	0.125994	4		0.42705	0.0354222	4		0.114646	0.0124526	4		0.149443	0.0376619	4
4.867		1.20531	0.136279	4		0.399108	0.0309345	4		0.108241	0.0221572	4		0.138047	0.0390263	4
4.883		1.16908	0.137449	4		0.409053	0.0381651	4		0.111991	0.028692	4		0.127985	0.0184571	4
4.9		1.12616	0.117506	4		0.362223	0.0635665	4		0.124536	0.010756	4		0.124481	0.0258739	4
4.917		1.08136	0.140308	4		0.423365	0.0128814	4		0.0963313	0.00719145	4		0.135683	0.0266795	4
4.933		1.16996	0.110131	4		0.406588	0.0423724	4		0.120481	0.0157027	4		0.126739	0.0304604	4
4.95		1.12906	0.130201	4		0.409549	0.0123305	4		0.101827	0.0125056	4		0.119523	0.0255944	4
4.967		1.14829	0.15674	4		0.413359	0.0112217	4		0.114947	0.0191044	4		0.127319	0.0294748	4
4.983		1.11965	0.119294	4		0.421726	0.00743423	3		0.0991793	0.0209076	4		0.0940042	0.0341677	4
5		1.11832	0.155157	4		0.415868	0.0146725	3		0.11641	0.0241549	4		0.0982178	0.0186419	4

## Sheet: Fig 4C
Figure 4C normalized
		bufferWash				scramDNA				7R-parS				ParB				ParB-7R-parS
Time(min)		Mean	SEM	n		Mean	SEM	n		Mean	SEM	n		Mean	SEM	n		Mean	SEM	n
0		1	0	4		1	0	4		1	0	6		1	0	4		1	0	3
0.0166667		0.959442	0.00802412	4		0.980095	0.00411215	4		0.98756	0.00225308	6		0.991017	0.0042283	4		0.992696	0.00477398	3
0.0333333		0.938454	0.014616	4		0.946546	0.00593482	4		0.970416	0.00590524	6		0.96954	0.00822978	4		0.970884	0.00408281	3
0.05		0.926962	0.0125576	4		0.919999	0.0183145	4		0.952865	0.00764585	6		0.949208	0.00987744	4		0.944484	0.00346111	3
0.0666667		0.915222	0.0128246	4		0.918276	0.0116088	4		0.938569	0.00939542	6		0.932428	0.00922456	4		0.914525	0.010563	3
0.0833333		0.899971	0.0144522	4		0.902853	0.0119853	4		0.926455	0.0109184	6		0.915936	0.00820435	4		0.891548	0.0122423	3
0.1		0.888172	0.0119971	4		0.887349	0.0121204	4		0.911848	0.0119123	6		0.905391	0.00965381	4		0.862382	0.0133119	3
0.116667		0.875664	0.0118777	4		0.876208	0.014019	4		0.898956	0.0137136	6		0.894475	0.0120799	4		0.832146	0.0155364	3
0.133333		0.867052	0.0107849	4		0.862835	0.0158114	4		0.883829	0.0144964	6		0.884069	0.0146856	4		0.804281	0.0205755	3
0.15		0.858487	0.0103461	4		0.84853	0.0198556	4		0.872556	0.0151388	6		0.870786	0.0184158	4		0.772396	0.0239782	3
0.166667		0.847579	0.00759318	4		0.833362	0.0217896	4		0.862792	0.0154409	6		0.85732	0.0221773	4		0.739143	0.0268552	3
0.183333		0.839524	0.00844182	4		0.82739	0.0207047	4		0.851484	0.0166781	6		0.845676	0.022462	4		0.711075	0.0300238	3
0.2		0.830325	0.00627936	4		0.817366	0.0216943	4		0.840007	0.016422	6		0.833923	0.025059	4		0.679187	0.0319762	3
0.216667		0.820215	0.00756576	4		0.799855	0.024455	4		0.831238	0.0174515	6		0.822254	0.0288261	4		0.653803	0.0331825	3
0.233333		0.814238	0.00598634	4		0.798104	0.0213368	4		0.81952	0.0185692	6		0.810943	0.0326146	4		0.625137	0.0361716	3
0.25		0.807482	0.00695336	4		0.790021	0.0221579	4		0.807202	0.0191206	6		0.801254	0.0362798	4		0.594767	0.0361471	3
0.266667		0.796064	0.00731341	4		0.779678	0.0217871	4		0.797627	0.0198465	6		0.788848	0.0378081	4		0.570069	0.0388425	3
0.283333		0.793037	0.00459063	4		0.771711	0.0214997	4		0.787623	0.0198643	6		0.7741	0.0394585	4		0.547478	0.0399142	3
0.3		0.781459	0.00729463	4		0.76235	0.0223522	4		0.77693	0.0200927	6		0.765221	0.044403	4		0.524806	0.0403711	3
0.316667		0.774203	0.00558169	4		0.756675	0.0194813	4		0.764866	0.0208075	6		0.750346	0.0452093	4		0.500669	0.0410997	3
0.333333		0.76969	0.00423819	4		0.749671	0.0197541	4		0.755016	0.0224583	6		0.742328	0.0483246	4		0.477224	0.0432496	3
0.35		0.758428	0.00344217	4		0.740894	0.0188801	4		0.74598	0.0222964	6		0.731638	0.0503583	4		0.456021	0.0432838	3
0.366667		0.748052	0.00332425	4		0.731755	0.0209491	4		0.735128	0.0228747	6		0.721762	0.0518622	4		0.435742	0.0424713	3
0.383333		0.73903	0.00275191	4		0.724474	0.0202274	4		0.725792	0.0233242	6		0.712584	0.0536615	4		0.416958	0.043515	3
0.4		0.731159	0.00413737	4		0.714601	0.0210332	4		0.714649	0.0242179	6		0.701481	0.0553284	4		0.397771	0.0422093	3
0.416667		0.722398	0.00348426	4		0.709022	0.0217375	4		0.707449	0.0249335	6		0.693095	0.0570933	4		0.378157	0.0428323	3
0.433333		0.713376	0.00453162	4		0.704147	0.0228454	4		0.696647	0.0252399	6		0.682273	0.058713	4		0.363586	0.0432289	3
0.45		0.708341	0.00297071	4		0.69398	0.0241419	4		0.687388	0.0263733	6		0.673701	0.0611542	4		0.348252	0.0417126	3
0.466667		0.699389	0.00397928	4		0.684867	0.0240368	4		0.677133	0.0272485	6		0.665355	0.0613162	4		0.33273	0.0410134	3
0.483333		0.69112	0.00485182	4		0.679069	0.0252993	4		0.665755	0.026921	6		0.657931	0.0627655	4		0.319451	0.040962	3
0.5		0.684593	0.00631843	4		0.666182	0.0251359	4		0.655857	0.0277244	6		0.647061	0.0641146	4		0.307784	0.0394536	3
0.516667		0.679352	0.00623706	4		0.662949	0.024491	4		0.649253	0.028512	6		0.63645	0.0636836	4		0.290663	0.039072	3
0.533333		0.670985	0.00744166	4		0.655886	0.0246644	4		0.638398	0.0286628	6		0.627019	0.0643152	4		0.27736	0.038158	3
0.55		0.664636	0.00778545	4		0.649863	0.0259875	4		0.627489	0.0289566	6		0.618071	0.0653518	4		0.264796	0.0382428	3
0.566667		0.655586	0.0102814	4		0.638373	0.0253235	4		0.620692	0.0300315	6		0.605866	0.0652366	4		0.25352	0.0367799	3
0.583333		0.645463	0.0101426	4		0.633085	0.0266806	4		0.609673	0.0301651	6		0.600526	0.0657319	4		0.242187	0.03524	3
0.6		0.637784	0.0108511	4		0.623473	0.0258771	4		0.60135	0.0311435	6		0.595451	0.0674409	4		0.232307	0.0342992	3
0.616667		0.629051	0.0125362	4		0.615837	0.0286354	4		0.591695	0.0320946	6		0.587764	0.0683168	4		0.221895	0.0341081	3
0.633333		0.622029	0.0135866	4		0.605297	0.0276868	4		0.581887	0.0326367	6		0.58202	0.0694995	4		0.211257	0.0322286	3
0.65		0.613538	0.0132609	4		0.60182	0.0277366	4		0.573709	0.0329667	6		0.573477	0.0692303	4		0.202673	0.0304208	3
0.666667		0.606394	0.0129927	4		0.595168	0.0295208	4		0.564341	0.033605	6		0.568979	0.0707079	4		0.194185	0.0294871	3
0.683333		0.600367	0.0144729	4		0.587789	0.0304763	4		0.555943	0.0342523	6		0.561235	0.0715036	4		0.185734	0.0286856	3
0.7		0.591337	0.0148528	4		0.582239	0.0304982	4		0.546328	0.0345578	6		0.552158	0.071323	4		0.178176	0.0274338	3
0.716667		0.585305	0.0168662	4		0.576042	0.0315838	4		0.534854	0.0347788	6		0.543422	0.071445	4		0.17133	0.0265301	3
0.733333		0.57721	0.0181339	4		0.566734	0.0331034	4		0.528716	0.0353643	6		0.536037	0.0721596	4		0.164186	0.0244458	3
0.75		0.573422	0.0203353	4		0.559404	0.0312753	4		0.519314	0.0358637	6		0.528729	0.0714993	4		0.157572	0.0236017	3
0.766667		0.565885	0.0215063	4		0.554391	0.0333351	4		0.509213	0.0367695	6		0.520131	0.0709032	4		0.149948	0.0232401	3
0.783333		0.555964	0.0223611	4		0.544274	0.03327	4		0.50186	0.0373548	6		0.51369	0.0714575	4		0.144255	0.0221383	3
0.8		0.551004	0.0241925	4		0.537361	0.0339814	4		0.49381	0.0377393	6		0.506836	0.0710965	4		0.138995	0.0208295	3
0.816667		0.540733	0.0219956	4		0.532572	0.035331	4		0.484401	0.0384233	6		0.499906	0.0709671	4		0.13321	0.0192577	3
0.833333		0.538539	0.0243099	4		0.525981	0.035007	4		0.474645	0.0384201	6		0.49301	0.0704931	4		0.127808	0.0183148	3
0.85		0.5299	0.0247115	4		0.51991	0.0340521	4		0.467514	0.0392818	6		0.489242	0.0716958	4		0.123396	0.0171134	3
0.866667		0.522444	0.0255276	4		0.515815	0.0361227	4		0.458067	0.0394651	6		0.483665	0.0713788	4		0.11816	0.0161517	3
0.883333		0.513372	0.0271507	4		0.507135	0.0373709	4		0.448746	0.0403339	6		0.477474	0.0710966	4		0.113014	0.0149881	3
0.9		0.507504	0.0284255	4		0.494769	0.0344543	4		0.440801	0.040808	6		0.469672	0.0706462	4		0.108445	0.0143786	3
0.916667		0.499061	0.0283223	4		0.492226	0.0364158	4		0.430922	0.0410049	6		0.463623	0.0706856	4		0.104551	0.0134913	3
0.933333		0.490465	0.0298637	4		0.48307	0.0357681	4		0.423674	0.0425842	6		0.457234	0.0696631	4		0.101214	0.0123118	3
0.95		0.485455	0.0313365	4		0.48014	0.0384839	4		0.414532	0.0433288	6		0.460938	0.0742678	4		0.0972644	0.0107683	3
0.966667		0.478127	0.031415	4		0.473738	0.039282	4		0.407224	0.043271	6		0.454894	0.0750828	4		0.0937996	0.0103532	3
0.983333		0.470535	0.0338782	4		0.470205	0.040529	4		0.396449	0.0435488	6		0.447002	0.0733867	4		0.0908978	0.0100628	3
1		0.464198	0.034432	4		0.461285	0.0382358	4		0.389331	0.0442369	6		0.440433	0.0722082	4		0.0887954	0.00943173	3
1.01667		0.459443	0.0377737	4		0.45799	0.0410626	4		0.38135	0.0446414	6		0.43472	0.0727474	4		0.085816	0.00855992	3
1.03333		0.448286	0.037146	4		0.451565	0.0432941	4		0.373442	0.0454613	6		0.425722	0.0712087	4		0.0827381	0.00798588	3
1.05		0.444394	0.0403628	4		0.442568	0.0420163	4		0.366943	0.0458494	6		0.420485	0.0698992	4		0.0800104	0.00709617	3
1.06667		0.436347	0.041279	4		0.438559	0.0454486	4		0.357885	0.0466843	6		0.41307	0.0689238	4		0.0775486	0.00674343	3
1.08333		0.429494	0.0424812	4		0.432102	0.0439575	4		0.350709	0.0475801	6		0.406757	0.0688953	4		0.075115	0.00597066	3
1.1		0.424965	0.0444525	4		0.425358	0.0430176	4		0.343427	0.048292	6		0.40034	0.067587	4		0.0726232	0.00502154	3
1.11667		0.418172	0.0461689	4		0.419765	0.0450057	4		0.335585	0.048146	6		0.394801	0.0661832	4		0.070616	0.00483597	3
1.13333		0.413324	0.0481677	4		0.413654	0.0448797	4		0.328337	0.0484957	6		0.389276	0.065657	4		0.068196	0.00442231	3
1.15		0.407395	0.0486056	4		0.410799	0.0455287	4		0.321626	0.0488949	6		0.382993	0.0647389	4		0.0664192	0.00399862	3
1.16667		0.399423	0.0501119	4		0.405511	0.0467847	4		0.314805	0.0490393	6		0.378057	0.0646076	4		0.064363	0.00285514	3
1.18333		0.390777	0.0490768	4		0.397764	0.0476314	4		0.307567	0.0493292	6		0.370967	0.0634539	4		0.0627179	0.00247792	3
1.2		0.386033	0.0521704	4		0.391497	0.0483108	4		0.30098	0.0494533	6		0.365571	0.0622129	4		0.0613405	0.00203726	3
1.21667		0.378588	0.0530305	4		0.384378	0.0489088	4		0.293136	0.0491512	6		0.361172	0.0621959	4		0.0603344	0.001578	3
1.23333		0.373944	0.0548164	4		0.380326	0.0496611	4		0.28736	0.0496722	6		0.353787	0.0599929	4		0.0588044	0.00111551	3
1.25		0.366629	0.0543592	4		0.37531	0.0507949	4		0.281387	0.0500281	6		0.347559	0.0589292	4		0.0574373	0.000768346	3
1.26667		0.360962	0.0559875	4		0.368668	0.0510094	4		0.275232	0.0500965	6		0.342826	0.0581688	4		0.0559657	0.000586171	3
1.28333		0.356392	0.0578642	4		0.362408	0.049034	4		0.268347	0.0500149	6		0.337561	0.057051	4		0.0544021	0.00038823	3
1.3		0.346991	0.0580894	4		0.357625	0.0518354	4		0.261756	0.0496315	6		0.331797	0.0564421	4		0.0537606	0.000319763	3
1.31667		0.34392	0.0600639	4		0.348853	0.05039	4		0.255336	0.0492788	6		0.324964	0.0549632	4		0.0522877	0.000570824	3
1.33333		0.336638	0.0600887	4		0.344745	0.0526947	4		0.250139	0.0489388	6		0.320796	0.0543453	4		0.0513414	0.000416086	3
1.35		0.330256	0.0615491	4		0.340548	0.0552375	4		0.244713	0.0485284	6		0.314518	0.0528994	4		0.0504861	0.000869338	3
1.36667		0.325165	0.0621909	4		0.335759	0.0557846	4		0.237637	0.0479374	6		0.312018	0.0526893	4		0.0501023	0.0014454	3
1.38333		0.320042	0.063241	4		0.330138	0.0555597	4		0.234122	0.0483971	6		0.307765	0.0518791	4		0.0485274	0.0012486	3
1.4		0.316744	0.0643971	4		0.322816	0.0534785	4		0.229367	0.0480225	6		0.303569	0.0516959	4		0.0474311	0.001242	3
1.41667		0.310228	0.0653007	4		0.321738	0.0575872	4		0.224419	0.0474786	6		0.299923	0.0507976	4		0.0469117	0.00151287	3
1.43333		0.30511	0.0664984	4		0.316194	0.0577095	4		0.218803	0.046826	6		0.294661	0.0510001	4		0.0458274	0.00147945	3
1.45		0.29799	0.0657398	4		0.312732	0.0591362	4		0.21312	0.0457614	6		0.288936	0.0500111	4		0.0450552	0.00169615	3
1.46667		0.292394	0.066339	4		0.306865	0.0595991	4		0.207208	0.0451855	6		0.284713	0.0490881	4		0.0440806	0.00216597	3
1.48333		0.288099	0.0665976	4		0.302211	0.0593945	4		0.202133	0.0443525	6		0.280419	0.0483006	4		0.0440968	0.00233	3
1.5		0.283918	0.0676627	4		0.297502	0.0600731	4		0.198463	0.0439383	6		0.275462	0.0470203	4		0.0433926	0.00257223	3
1.51667		0.281144	0.0685111	4		0.290323	0.0581449	4		0.193998	0.0435734	6		0.272846	0.0474789	4		0.0424267	0.00217815	3
1.53333		0.276255	0.0697923	4		0.28913	0.0621257	4		0.18969	0.0429101	6		0.266993	0.0458733	4		0.0414742	0.00258658	3
1.55		0.270057	0.0684376	4		0.282739	0.0593005	4		0.185083	0.0423106	6		0.263818	0.0453141	4		0.0415249	0.00290038	3
1.56667		0.267036	0.0706111	4		0.278732	0.0610341	4		0.18125	0.0421424	6		0.258869	0.0445651	4		0.040886	0.00327954	3
1.58333		0.262732	0.0705481	4		0.273788	0.0597884	4		0.176651	0.0415116	6		0.25505	0.043155	4		0.0400431	0.00332206	3
1.6		0.259887	0.0718929	4		0.267947	0.0582113	4		0.172719	0.040928	6		0.250617	0.0426253	4		0.0399847	0.00329767	3
1.61667		0.254107	0.0716337	4		0.267645	0.0620372	4		0.16835	0.0397808	6		0.248354	0.0423306	4		0.038436	0.00303338	3
1.63333		0.251296	0.071764	4		0.262405	0.061621	4		0.163809	0.0389792	6		0.244907	0.0411264	4		0.0390963	0.00326534	3
1.65		0.248289	0.0725802	4		0.260047	0.0629732	4		0.160274	0.038926	6		0.240609	0.0401445	4		0.0386525	0.00332521	3
1.66667		0.245951	0.0736075	4		0.255638	0.0627509	4		0.156035	0.0380177	6		0.237569	0.0394511	4		0.037869	0.00348909	3
1.68333		0.241476	0.0726778	4		0.251455	0.0617972	4		0.153068	0.037323	6		0.232886	0.039037	4		0.0370937	0.00344944	3
1.7		0.241354	0.0747007	4		0.246793	0.06076	4		0.150009	0.0374171	6		0.229473	0.0379863	4		0.0370346	0.00356941	3
1.71667		0.235244	0.0737369	4		0.243224	0.0613716	4		0.146134	0.0364229	6		0.226422	0.0375603	4		0.0372587	0.00392546	3
1.73333		0.233974	0.0757712	4		0.239354	0.0617252	4		0.142504	0.0356586	6		0.224323	0.0373478	4		0.0369212	0.00379145	3
1.75		0.229717	0.073966	4		0.2371	0.0624122	4		0.138108	0.0348346	6		0.221317	0.0367471	4		0.036255	0.00377811	3
1.76667		0.229626	0.0764761	4		0.234493	0.0627547	4		0.135529	0.0346392	6		0.217154	0.0357478	4		0.035962	0.00393762	3
1.78333		0.225076	0.0750967	4		0.23126	0.0629194	4		0.132387	0.0342301	6		0.212902	0.0349078	4		0.0354984	0.00396748	3
1.8		0.221094	0.0741623	4		0.226934	0.0619856	4		0.130071	0.034266	6		0.211267	0.0353434	4		0.0351089	0.00401207	3
1.81667		0.215255	0.0721776	4		0.221621	0.0606525	4		0.126312	0.0331005	6		0.208677	0.034679	4		0.0348031	0.00428613	3
1.83333		0.213004	0.0725925	4		0.219886	0.0615134	4		0.123687	0.0326521	6		0.206188	0.034346	4		0.0345545	0.00410768	3
1.85		0.214462	0.0745456	4		0.216476	0.061368	4		0.121549	0.0325672	6		0.203798	0.0338218	4		0.0339405	0.00395994	3
1.86667		0.211177	0.0734346	4		0.214765	0.0624652	4		0.118133	0.0318582	6		0.201419	0.0333013	4		0.0333324	0.00414177	3
1.88333		0.208848	0.0737061	4		0.211133	0.0611405	4		0.117077	0.0318355	6		0.1988	0.0328723	4		0.0329915	0.00411333	3
1.9		0.207707	0.0744564	4		0.210119	0.0614959	4		0.114034	0.0313926	6		0.195782	0.0325785	4		0.0334593	0.00421385	3
1.91667		0.203695	0.073617	4		0.208333	0.0623401	4		0.111631	0.0310526	6		0.193728	0.0324065	4		0.0331222	0.00424742	3
1.93333		0.19951	0.0716375	4		0.203423	0.0609875	4		0.108476	0.0304638	6		0.190702	0.0317076	4		0.0324312	0.0041602	3
1.95		0.19883	0.0730563	4		0.197074	0.0579046	4		0.106957	0.030694	6		0.187851	0.0310209	4		0.0323992	0.00438401	3
1.96667		0.196463	0.0723148	4		0.196819	0.0596892	4		0.104781	0.0298088	6		0.18487	0.0309641	4		0.0323244	0.00426204	3
1.98333		0.194242	0.0722021	4		0.194887	0.0602592	4		0.102512	0.0294001	6		0.182734	0.0297509	4		0.0319635	0.00431315	3
2		0.191436	0.0719021	4		0.192132	0.0600489	4		0.100685	0.028925	6		0.180339	0.0299083	4		0.0316593	0.00432317	3
2.01667		0.191681	0.0730152	4		0.190527	0.0617714	4		0.0988314	0.0288472	6		0.178076	0.0294977	4		0.0317767	0.00454699	3
2.03333		0.187345	0.0719819	4		0.187678	0.0599001	4		0.0979358	0.0286568	6		0.174998	0.0284089	4		0.0311559	0.00484305	3
2.05		0.18652	0.0710216	4		0.184112	0.0579204	4		0.0959935	0.0284649	6		0.171903	0.0279882	4		0.0311209	0.00479722	3
2.06667		0.182409	0.0695036	4		0.180899	0.0572109	4		0.0940965	0.0282614	6		0.171081	0.0285532	4		0.0304832	0.0043138	3
2.08333		0.181684	0.069763	4		0.181482	0.0591197	4		0.0926913	0.0276084	6		0.168991	0.0278223	4		0.0305572	0.00441016	3
2.1		0.180082	0.0705869	4		0.178716	0.0597088	4		0.0916857	0.0274512	6		0.166691	0.027714	4		0.0305425	0.00451979	3
2.11667		0.176694	0.0686389	4		0.176226	0.0585956	4		0.090261	0.0272731	6		0.164745	0.0279919	4		0.0299819	0.00437009	3
2.13333		0.178562	0.0707477	4		0.17401	0.0593054	4		0.0882128	0.0269387	6		0.162271	0.0276217	4		0.0300381	0.0046057	3
2.15		0.174893	0.0692275	4		0.171997	0.0588815	4		0.0867999	0.0266699	6		0.161704	0.0268231	4		0.029721	0.00453083	3
2.16667		0.173072	0.0690401	4		0.167347	0.0560837	4		0.0851504	0.0260735	6		0.158716	0.0265483	4		0.0296588	0.0044136	3
2.18333		0.171045	0.0677646	4		0.168077	0.0581699	4		0.0846192	0.02599	6		0.157656	0.0265895	4		0.0296439	0.00460684	3
2.2		0.170958	0.069332	4		0.167122	0.058027	4		0.0833493	0.0256523	6		0.155451	0.0261835	4		0.0293565	0.00488619	3
2.21667		0.169656	0.0683095	4		0.166167	0.0578976	4		0.0823072	0.0253175	6		0.153316	0.0260645	4		0.0293842	0.00454581	3
2.23333		0.167896	0.0681442	4		0.162136	0.0559563	4		0.0812149	0.0251798	6		0.150542	0.0258729	4		0.0290462	0.00489642	3
2.25		0.166579	0.0682111	4		0.160736	0.0558046	4		0.0801018	0.0249321	6		0.149786	0.0256786	4		0.0287647	0.00469959	3
2.26667		0.164805	0.0690748	4		0.157584	0.0557272	4		0.0790473	0.0245852	6		0.148596	0.0256966	4		0.0287209	0.00476432	3
2.28333		0.160458	0.0654737	4		0.156119	0.055569	4		0.077871	0.0245619	6		0.146248	0.0251916	4		0.0280964	0.00472266	3
2.3		0.159641	0.0652657	4		0.152924	0.0540388	4		0.0767555	0.0247251	6		0.14382	0.0248823	4		0.0279422	0.00463962	3
2.31667		0.158423	0.0654007	4		0.153034	0.0551609	4		0.0757291	0.0242389	6		0.142514	0.0245915	4		0.0280512	0.00463901	3
2.33333		0.158818	0.0661434	4		0.150016	0.0541449	4		0.0755122	0.0235967	6		0.139891	0.0239304	4		0.0282406	0.00473861	3
2.35		0.157336	0.0671216	4		0.150503	0.055527	4		0.0743165	0.0232828	6		0.138591	0.0239648	4		0.0275648	0.00440785	3
2.36667		0.155569	0.0652439	4		0.146372	0.0527096	4		0.0737432	0.0233405	6		0.136923	0.023657	4		0.0272271	0.00456052	3
2.38333		0.153879	0.0641789	4		0.144475	0.0522268	4		0.073106	0.0227256	6		0.135738	0.0234652	4		0.0272753	0.00461426	3
2.4		0.153887	0.0647817	4		0.144055	0.0536172	4		0.0715385	0.0225197	6		0.134531	0.0237455	4		0.0272707	0.00463898	3
2.41667		0.152207	0.064861	4		0.141771	0.0525832	4		0.0710716	0.0225141	6		0.133173	0.0238259	4		0.0272226	0.00465731	3
2.43333		0.149467	0.062418	4		0.140979	0.0526116	4		0.070733	0.0228113	6		0.13078	0.0233751	4		0.0269016	0.0046827	3
2.45		0.14918	0.0636694	4		0.140097	0.0535754	4		0.0697333	0.0223774	6		0.129423	0.0229607	4		0.0271747	0.00485103	3
2.46667		0.145624	0.0622488	4		0.139404	0.0538664	4		0.0687635	0.0217184	6		0.128357	0.0223168	4		0.0270258	0.00477055	3
2.48333		0.144815	0.0612654	4		0.13744	0.0530452	4		0.0683557	0.0218158	6		0.126707	0.0224554	4		0.0270521	0.00476937	3
2.5		0.146804	0.0632478	4		0.134128	0.0518113	4		0.0669699	0.021589	6		0.125512	0.0225757	4		0.026815	0.00492807	3
2.51667		0.144605	0.0633437	4		0.129694	0.047822	4		0.0662779	0.0211506	6		0.124858	0.0221239	4		0.0266106	0.00490201	3
2.53333		0.142167	0.0615644	4		0.130822	0.0492315	4		0.0659578	0.0210898	6		0.122105	0.0222527	4		0.026666	0.00500995	3
2.55		0.144432	0.0630907	4		0.128058	0.0480194	4		0.0659004	0.021049	6		0.120942	0.0216177	4		0.0265397	0.00484217	3
2.56667		0.142872	0.0632559	4		0.12972	0.051455	4		0.0650437	0.0206528	6		0.120285	0.0222032	4		0.0260133	0.00484446	3
2.58333		0.141452	0.0620177	4		0.126845	0.0491275	4		0.0640702	0.020485	6		0.119665	0.022052	4		0.0260677	0.00435726	3
2.6		0.140948	0.0634357	4		0.125389	0.0501223	4		0.0637558	0.0202858	6		0.117909	0.022313	4		0.0257524	0.00468454	3
2.61667		0.139021	0.062266	4		0.126095	0.0505405	4		0.0626653	0.0199488	6		0.116843	0.0224635	4		0.0258997	0.00450126	3
2.63333		0.134832	0.0593949	4		0.123003	0.0482395	4		0.0622036	0.0197354	6		0.114568	0.0213139	4		0.0254939	0.00461655	3
2.65		0.135856	0.0609029	4		0.122051	0.0499765	4		0.0612086	0.0191979	6		0.113146	0.0219737	4		0.0257795	0.00481443	3
2.66667		0.13374	0.0607268	4		0.122722	0.0505643	4		0.060793	0.019254	6		0.112466	0.02192	4		0.0256971	0.00479423	3
2.68333		0.131328	0.0588781	4		0.11991	0.0471233	4		0.0611518	0.0193324	6		0.111172	0.0210004	4		0.0251324	0.0046933	3
2.7		0.130353	0.0585881	4		0.121852	0.0500345	4		0.0608051	0.0191899	6		0.110204	0.0213143	4		0.0248282	0.00454259	3
2.71667		0.130387	0.0592183	4		0.119759	0.0490725	4		0.0599738	0.0188395	6		0.109292	0.0217128	4		0.024851	0.00451007	3
2.73333		0.130449	0.0596368	4		0.119761	0.0492703	4		0.0595475	0.0187523	6		0.109536	0.0217325	4		0.0247069	0.00467007	3
2.75		0.12955	0.0581602	4		0.115167	0.0456567	4		0.0591799	0.0182922	6		0.107992	0.0218094	4		0.0245373	0.00462472	3
2.76667		0.127761	0.0578458	4		0.116295	0.047464	4		0.0592926	0.0181425	6		0.105576	0.0211526	4		0.0247502	0.00464355	3
2.78333		0.128671	0.0581524	4		0.116455	0.0478901	4		0.0576972	0.0176907	6		0.105644	0.0210959	4		0.0247913	0.00489803	3
2.8		0.127951	0.0588286	4		0.11449	0.0465499	4		0.0575601	0.0176765	6		0.104768	0.0214446	4		0.0246465	0.00483371	3
2.81667		0.126489	0.0571157	4		0.112471	0.0463959	4		0.0569576	0.017454	6		0.103649	0.0208056	4		0.0241892	0.00469763	3
2.83333		0.12608	0.058336	4		0.109586	0.0444712	4		0.0571506	0.0176444	6		0.102764	0.0201426	4		0.0246057	0.00482314	3
2.85		0.124368	0.0571403	4		0.11163	0.0467462	4		0.0560506	0.0171417	6		0.101537	0.0201348	4		0.0240799	0.00476066	3
2.86667		0.122918	0.0568039	4		0.109749	0.0458924	4		0.0562338	0.0171953	6		0.101	0.0204689	4		0.0240359	0.0045232	3
2.88333		0.121754	0.0563966	4		0.110658	0.0469566	4		0.0556924	0.0171687	6		0.100033	0.0204624	4		0.0239717	0.00471582	3
2.9		0.120872	0.0569964	4		0.109345	0.045854	4		0.0552278	0.0169553	6		0.0983077	0.0208896	4		0.0239447	0.00480968	3
2.91667		0.121192	0.056527	4		0.108232	0.0451489	4		0.0547146	0.016698	6		0.0976891	0.0206543	4		0.0237286	0.00469235	3
2.93333		0.11987	0.0554469	4		0.106944	0.0443748	4		0.0542825	0.0167547	6		0.0970771	0.0201394	4		0.0245373	0.004948	3
2.95		0.118406	0.0547216	4		0.105031	0.0445335	4		0.0545268	0.0166235	6		0.0959549	0.0203575	4		0.0240297	0.00471485	3
2.96667		0.118485	0.0555079	4		0.10177	0.0420398	4		0.0539842	0.0165821	6		0.0955515	0.0202279	4		0.0235388	0.00447776	3
2.98333		0.115759	0.0546291	4		0.103081	0.0427584	4		0.0526596	0.0160542	6		0.0944392	0.0199997	4		0.0238145	0.00489214	3
3		0.11569	0.0550506	4		0.106207	0.0462247	4		0.0521209	0.0158527	6		0.0941892	0.0199857	4		0.0239639	0.00513519	3
3.01667		0.113293	0.0548632	4		0.102053	0.0433906	4		0.0521929	0.0156541	6		0.0925562	0.0200871	4		0.0238133	0.00860701	2
3.03333		0.113418	0.0533499	4		0.103044	0.0438624	4		0.0517291	0.015045	6		0.0912688	0.0200856	4		0.0239597	0.00888535	2
3.05		0.113854	0.0543797	4		0.101545	0.0434146	4		0.0511739	0.0148182	6		0.0904854	0.0199105	4		0.0235954	0.00874596	2
3.06667		0.113009	0.0533614	4		0.101932	0.0440483	4		0.0509739	0.014947	6		0.0892822	0.0205408	4		0.0236559	0.00902583	2
3.08333		0.112002	0.0528916	4		0.100891	0.0443792	4		0.0511305	0.015327	6		0.0881278	0.0201165	4		0.0242802	0.00890344	2
3.1		0.113498	0.0552407	4		0.0983065	0.0423632	4		0.05039	0.0151666	6		0.088121	0.0201924	4		0.0237933	0.00910561	2
3.11667		0.113925	0.0551433	4		0.0981894	0.0421237	4		0.0500956	0.0148555	6		0.0876621	0.0203152	4		0.0236387	0.00852206	2
3.13333		0.111914	0.0539668	4		0.0980938	0.042636	4		0.0492149	0.0147957	6		0.0864105	0.0200459	4		0.023673	0.00917229	2
3.15		0.109679	0.0526301	4		0.0966371	0.0425096	4		0.0490175	0.0146567	6		0.085236	0.0197952	4		0.0234716	0.00855382	2
3.16667		0.111474	0.0549386	4		0.095019	0.0411924	4		0.0487908	0.0142283	6		0.084884	0.0198318	4		0.0230557	0.00861397	2
3.18333		0.109387	0.0537164	4		0.0952654	0.0422837	4		0.0486156	0.0142197	6		0.0837526	0.0202683	4		0.0232288	0.00865784	2
3.2		0.10768	0.0531105	4		0.0938332	0.0400172	4		0.0482979	0.014478	6		0.0826684	0.0193434	4		0.0231945	0.00896278	2
3.21667		0.108254	0.0528607	4		0.0949648	0.0420667	4		0.048249	0.0141056	6		0.0816393	0.0196034	4		0.0230575	0.00872923	2
3.23333		0.108588	0.0536492	4		0.0941772	0.0416838	4		0.0486488	0.0139438	6		0.0812323	0.0198011	4		0.0236136	0.0092974	2
3.25		0.107815	0.0521414	4		0.0930768	0.0402739	4		0.0480877	0.013916	6		0.0812783	0.0198812	4		0.0231129	0.00888448	2
3.26667		0.104233	0.0515307	4		0.0924321	0.0400981	4		0.0476076	0.0136994	6		0.0808658	0.0200519	4		0.0311192		1
3.28333		0.106347	0.0529847	4		0.0910439	0.0391305	4		0.0480009	0.0141268	6		0.0802034	0.0201245	4		0.0319971		1
3.3		0.105973	0.0530749	4		0.0905621	0.0386236	4		0.0471958	0.0141194	6		0.0794056	0.0200644	4
3.31667		0.106521	0.0543728	4		0.0882146	0.0365309	4		0.0470715	0.0137488	6		0.0789225	0.0199276	4
3.33333		0.105474	0.0533433	4		0.0901919	0.0391884	4		0.046086	0.0135972	6		0.0775877	0.0201094	4
3.35		0.105508	0.0528625	4		0.0871246	0.0369763	4		0.0464892	0.0134925	6		0.0771875	0.0198916	4
3.36667		0.10347	0.0517805	4		0.0867006	0.0360394	4		0.0460754	0.0135219	6		0.0761784	0.0197957	4
3.38333		0.104587	0.0526349	4		0.0847025	0.0351879	4		0.0453054	0.0133463	6		0.0755409	0.020105	4
3.4		0.102016	0.0512017	4		0.0865606	0.0383575	4		0.0459443	0.0135293	6		0.0755642	0.0198328	4
3.41667		0.100038	0.050541	4		0.0862105	0.0377877	4		0.0453721	0.0130302	6		0.074289	0.0199514	4
3.43333		0.0996936	0.0502621	4		0.0845705	0.0365089	4		0.0453311	0.0129998	6		0.0738712	0.020044	4
3.45		0.100204	0.0515159	4		0.0831444	0.0362454	4		0.0452856	0.0127449	6		0.073286	0.0199514	4
3.46667		0.0992242	0.0509306	4		0.0836506	0.0361536	4		0.0443732	0.0127827	6		0.072356	0.0195134	4
3.48333		0.0993133	0.0515678	4		0.0802662	0.0347551	4		0.0442238	0.0124869	6		0.0713101	0.01962	4
3.5		0.0982037	0.0509321	4		0.0824743	0.0356213	4		0.0444215	0.0125415	6		0.0703819	0.0191645	4
3.51667		0.0995518	0.0519434	4		0.082406	0.0359689	4		0.043666	0.0125058	6		0.0698115	0.0195725	4
3.53333		0.0975465	0.0492801	4		0.0804606	0.034067	4		0.0432893	0.0124121	6		0.0698655	0.0197523	4
3.55		0.0985573	0.0498161	4		0.0818114	0.0353527	4		0.0430507	0.012153	6		0.0695424	0.0198107	4
3.56667		0.0960456	0.0484392	4		0.0813425	0.035227	4		0.0429424	0.0123255	6		0.068689	0.0199844	4
3.58333		0.0973349	0.0501781	4		0.0787674	0.0333506	4		0.0427722	0.0125978	6		0.0683569	0.0199597	4
3.6		0.0950344	0.0486904	4		0.0806399	0.036027	4		0.0421258	0.0122065	6		0.0679627	0.0196678	4
3.61667		0.0958912	0.0505305	4		0.0806435	0.0361757	4		0.0425787	0.0123864	6		0.0663827	0.0196426	4
3.63333		0.0925275	0.0478475	4		0.0769987	0.0328315	4		0.0421396	0.0121187	6		0.0663787	0.0198603	4
3.65		0.0943328	0.0492209	4		0.0787123	0.0342696	4		0.0419161	0.0120549	6		0.0657424	0.0204032	4
3.66667		0.0939901	0.0485958	4		0.0780665	0.0339912	4		0.0419723	0.0121179	6		0.0648042	0.0198247	4
3.68333		0.0940553	0.0485431	4		0.0770268	0.0330682	4		0.0416693	0.0121922	6		0.0643353	0.0197994	4
3.7		0.0949299	0.0494866	4		0.0776951	0.0339393	4		0.0414111	0.0120521	6		0.0637636	0.0204362	4
3.71667		0.092044	0.0476054	4		0.0760884	0.0327468	4		0.0414676	0.0122588	6		0.0631515	0.0204767	4
3.73333		0.0937574	0.0496748	4		0.0753679	0.0324036	4		0.0412749	0.0117624	6		0.063041	0.0198825	4
3.75		0.0909173	0.0472748	4		0.0728104	0.0300693	4		0.0408479	0.0117044	6		0.0615712	0.020357	4
3.76667		0.0902727	0.0475573	4		0.0747845	0.0314299	4		0.0408487	0.0117935	6		0.0607368	0.0201268	4
3.78333		0.0921389	0.0504701	4		0.0718245	0.0293968	4		0.040713	0.0116291	6		0.060592	0.0201275	4
3.8		0.0905448	0.0486673	4		0.0735749	0.0315473	4		0.0410271	0.0114487	6		0.0601953	0.0196592	4
3.81667		0.0895003	0.0474393	4		0.0730371	0.0311718	4		0.0401298	0.0112874	6		0.0604707	0.0196575	4
3.83333		0.0892874	0.0474304	4		0.0712191	0.0291407	4		0.0406453	0.0116994	6		0.0591741	0.0198348	4
3.85		0.0883509	0.046441	4		0.072962	0.0309615	4		0.040253	0.0116075	6		0.057874	0.0198278	4
3.86667		0.0880724	0.0472274	4		0.0725735	0.0313712	4		0.0400831	0.011404	6		0.0579818	0.0198111	4
3.88333		0.0884189	0.0468746	4		0.0711672	0.0297259	4		0.0398337	0.0113187	6		0.0580276	0.0201166	4
3.9		0.0874352	0.0460761	4		0.0703076	0.0296142	4		0.0399114	0.0115782	6		0.0566976	0.0200731	4
3.91667		0.0866154	0.0447776	4		0.0705912	0.029427	4		0.039697	0.0113987	6		0.0566695	0.020026	4
3.93333		0.085895	0.0447826	4		0.0687675	0.0285147	4		0.039538	0.0115524	6		0.0557946	0.0200419	4
3.95		0.0858941	0.045596	4		0.0681119	0.0284132	4		0.039371	0.0114033	6		0.0549847	0.0202426	4
3.96667		0.0844254	0.0451917	4		0.0669587	0.0275291	4		0.0384717	0.0108888	6		0.0548177	0.0199753	4
3.98333		0.0861699	0.0459456	4		0.0693335	0.0294294	4		0.0396005	0.0112688	6		0.0548933	0.0205911	4
4		0.0856674	0.0456505	4		0.0681526	0.0285406	4		0.0387122	0.011228	6		0.0547659	0.0206846	4
