# Supplementary material for: Distinct architectural requirements for the parS centromeric sequence of the pSM19035 plasmid partition machinery
Source: eLife. 2022 Sep 5;11:e79480. doi: 10.7554/eLife.79480 (PMC9499535; doi:10.7554/eLife.79480)
Supplement: Figure 5—source data 1. [file elife-79480-fig5-data1.xlsx]

## Sheet: Fig 5
Figure 5a normalized											Figure 5b normalized											Figure 5c normalized											Figure 5d normalized
		Buffer Wash				ParA Wash							Buffer Wash				ParA Wash							Buffer Wash				ParA Wash							Buffer Wash				ParA Wash
Time (min)		Mean	SEM	n		Mean	SEM	n			Time (min)		Mean	SEM	n		Mean	SEM	n			Time (min)		Mean	SEM	n		Mean	SEM	n			Time (min)		Mean	SEM	n		Mean	SEM	n
0		1	0	3		1	0	3			0		1	0	3		1	0	3			0		1	0	3		1	0	3			0		1	0	3		1	0	3
0.017		0.945159	0.00867735	3		1.02923	0.0394534	3			0.017		0.943727	0.0297038	3		0.94987	0.011879	3			0.017		0.911117	0.0379002	3		0.893477	0.0774982	3			0.017		0.947699	0.0218514	3		0.968861	0.00698291	3
0.033		0.916953	0.0188114	3		0.98501	0.0203345	3			0.033		0.91218	0.0433241	3		0.945674	0.0284602	3			0.033		0.939469	0.0104203	3		0.846849	0.118273	3			0.033		0.920563	0.0126574	3		0.947135	0.01212	3
0.05		0.908304	0.00870883	3		1.00253	0.0240746	3			0.05		0.878409	0.055708	3		0.905454	0.0291635	3			0.05		0.879207	0.0340598	3		0.798564	0.142348	3			0.05		0.826118	0.0449831	3		0.929868	0.0215647	3
0.067		0.892602	0.025716	3		1.03898	0.032152	3			0.067		0.828612	0.0899811	3		0.915734	0.0262418	3			0.067		0.899825	0.0218219	3		0.792806	0.157271	3			0.067		0.764859	0.06207	3		0.876147	0.0295291	3
0.083		0.88606	0.0163161	3		1.03261	0.0151501	3			0.083		0.784385	0.0992575	3		0.912994	0.0228739	3			0.083		0.865173	0.0393773	3		0.774586	0.167651	3			0.083		0.657409	0.0919469	3		0.87565	0.0483822	3
0.1		0.852635	0.0130737	3		0.987743	0.00773534	3			0.1		0.780088	0.0818234	3		0.823512	0.0418498	3			0.1		0.832134	0.0360296	3		0.765242	0.153714	3			0.1		0.579009	0.0918496	3		0.825784	0.0752269	3
0.117		0.822128	0.0260063	3		1.00265	0.0350416	3			0.117		0.756984	0.0942309	3		0.802959	0.0401388	3			0.117		0.783885	0.0653364	3		0.776999	0.161503	3			0.117		0.542332	0.109564	3		0.739282	0.0737569	3
0.133		0.840876	0.024663	3		0.931575	0.0449847	3			0.133		0.704949	0.0977633	3		0.760394	0.0633829	3			0.133		0.750555	0.07266	3		0.773728	0.173813	3			0.133		0.523754	0.0842172	3		0.651835	0.0580802	3
0.15		0.818913	0.0173555	3		0.940065	0.00574622	3			0.15		0.707795	0.0948676	3		0.762422	0.0691396	3			0.15		0.693144	0.0387499	3		0.798632	0.190151	3			0.15		0.493313	0.0774468	3		0.587803	0.0506252	3
0.167		0.800371	0.0156329	3		0.909947	0.00567096	3			0.167		0.714422	0.0908031	3		0.766922	0.0627827	3			0.167		0.664448	0.0462648	3		0.768022	0.183057	3			0.167		0.491126	0.0894523	3		0.562557	0.0463116	3
0.183		0.779569	0.0191563	3		0.914157	0.0387185	3			0.183		0.697026	0.085588	3		0.757657	0.0831881	3			0.183		0.588536	0.011865	3		0.684077	0.159983	3			0.183		0.433067	0.0955462	3		0.510331	0.0359877	3
0.2		0.770037	0.034084	3		0.85522	0.0135882	3			0.2		0.649954	0.102513	3		0.688166	0.0711626	3			0.2		0.542369	0.0248721	3		0.613211	0.146777	3			0.2		0.435792	0.0824625	3		0.501542	0.0492826	3
0.217		0.749223	0.0316054	3		0.843993	0.00251635	3			0.217		0.654173	0.100869	3		0.70384	0.0935389	3			0.217		0.535481	0.0229497	3		0.536422	0.0996698	3			0.217		0.424182	0.0645523	3		0.452409	0.0408387	3
0.233		0.752773	0.0371207	3		0.855535	0.000560055	3			0.233		0.635728	0.0919803	3		0.699142	0.109479	3			0.233		0.517998	0.0057859	3		0.489539	0.0683697	3			0.233		0.419043	0.0650225	3		0.452277	0.043373	3
0.25		0.746778	0.0329561	3		0.838357	0.0454381	3			0.25		0.617499	0.106617	3		0.660102	0.0998998	3			0.25		0.49114	0.0153149	3		0.47078	0.0621805	3			0.25		0.399932	0.068766	3		0.444628	0.0362339	3
0.267		0.744899	0.0377754	3		0.829093	0.0446512	3			0.267		0.622941	0.0981363	3		0.619551	0.0769819	3			0.267		0.470108	0.00697531	3		0.440192	0.0582952	3			0.267		0.369829	0.0727081	3		0.41987	0.0212571	3
0.283		0.708903	0.0346977	3		0.803432	0.0103053	3			0.283		0.587762	0.0974669	3		0.616133	0.0817528	3			0.283		0.465231	0.0190726	3		0.45313	0.058447	3			0.283		0.367175	0.0815065	3		0.423026	0.0338949	3
0.3		0.716113	0.0300716	3		0.833645	0.00611323	3			0.3		0.586512	0.0900008	3		0.577252	0.0756835	3			0.3		0.458422	0.00643626	3		0.425398	0.038217	3			0.3		0.37956	0.0737139	3		0.373525	0.0373961	3
0.317		0.720191	0.0335678	3		0.840743	0.0496359	3			0.317		0.582516	0.0890915	3		0.564814	0.0597492	3			0.317		0.416547	0.00390721	3		0.431493	0.0312546	3			0.317		0.378962	0.0639628	3		0.37198	0.0302033	3
0.333		0.716594	0.0277432	3		0.877556	0.00679553	3			0.333		0.566481	0.090853	3		0.546781	0.0521908	3			0.333		0.438962	0.0230556	3		0.413732	0.0408582	3			0.333		0.372425	0.0634227	3		0.355163	0.0235702	3
0.35		0.708192	0.0413954	3		0.819187	0.0300627	3			0.35		0.554228	0.0952229	3		0.531103	0.047841	3			0.35		0.439643	0.0209846	3		0.413351	0.0398038	3			0.35		0.355821	0.0661769	3		0.360807	0.0199964	3
0.367		0.676429	0.0427493	3		0.800681	0.0177336	3			0.367		0.558697	0.0782132	3		0.526185	0.0582654	3			0.367		0.431937	0.0168555	3		0.393722	0.0315634	3			0.367		0.347805	0.0656776	3		0.352282	0.014093	3
0.383		0.662841	0.0482772	3		0.756995	0.0342701	3			0.383		0.552859	0.0780744	3		0.496237	0.0495159	3			0.383		0.38803	0.00925421	3		0.39073	0.0463913	3			0.383		0.319266	0.0666299	3		0.312406	0.028681	3
0.4		0.650043	0.0383667	3		0.75537	0.0212022	3			0.4		0.525917	0.0893188	3		0.50083	0.0661534	3			0.4		0.409314	0.0353816	3		0.388515	0.0320118	3			0.4		0.354563	0.0355841	3		0.327553	0.0262241	3
0.417		0.64042	0.0483515	3		0.793112	0.0175839	3			0.417		0.527846	0.0783756	3		0.500383	0.0473083	3			0.417		0.387017	0.00551421	3		0.366306	0.0419962	3			0.417		0.308486	0.0616783	3		0.304138	0.0124703	3
0.433		0.650707	0.046304	3		0.782278	0.0267013	3			0.433		0.524058	0.0721554	3		0.461456	0.0373572	3			0.433		0.395821	0.0135651	3		0.364888	0.021692	3			0.433		0.319584	0.0480813	3		0.287051	0.0282628	3
0.45		0.625185	0.0454668	3		0.738858	0.0298354	3			0.45		0.507271	0.0864214	3		0.48219	0.0599782	3			0.45		0.369971	0.0172156	3		0.360743	0.0354869	3			0.45		0.305289	0.0512853	3		0.309243	0.00754375	3
0.467		0.626478	0.0385498	3		0.72885	0.018981	3			0.467		0.498573	0.0883882	3		0.467248	0.0639129	3			0.467		0.353616	0.0165016	3		0.378284	0.0310683	3			0.467		0.303917	0.0518255	3		0.272263	0.0116044	3
0.483		0.628531	0.0434205	3		0.756211	0.00482217	3			0.483		0.496137	0.0887257	3		0.450301	0.0347723	3			0.483		0.364761	0.0158703	3		0.339833	0.0331816	3			0.483		0.29807	0.0466786	3		0.287718	0.0152645	3
0.5		0.62147	0.0437984	3		0.776496	0.0166751	3			0.5		0.493912	0.085522	3		0.476224	0.0742433	3			0.5		0.338221	0.0134987	3		0.338992	0.0373453	3			0.5		0.282618	0.0554788	3		0.277615	0.0200572	3
0.517		0.601086	0.0296116	3		0.696905	0.0252889	3			0.517		0.482363	0.0906735	3		0.458301	0.0602067	3			0.517		0.349619	0.0210484	3		0.347565	0.0186551	3			0.517		0.289349	0.0481157	3		0.285692	0.0169887	3
0.533		0.592743	0.0468377	3		0.793596	0.0225646	3			0.533		0.483489	0.0816973	3		0.442168	0.0786433	3			0.533		0.343508	0.00887712	3		0.327803	0.0186205	3			0.533		0.273511	0.0444272	3		0.285366	0.0226227	3
0.55		0.597282	0.0376552	3		0.732976	0.0455827	3			0.55		0.464566	0.0885347	3		0.442271	0.0584679	3			0.55		0.336033	0.0151837	3		0.336265	0.0174593	3			0.55		0.288712	0.0532771	3		0.262675	0.0123662	3
0.567		0.591154	0.0309171	3		0.733083	0.0176503	3			0.567		0.459094	0.0851103	3		0.406941	0.0434745	3			0.567		0.324835	0.0294806	3		0.342385	0.0161293	3			0.567		0.29543	0.0330583	3		0.251919	0.0148712	3
0.583		0.576845	0.0333327	3		0.739721	0.0302466	3			0.583		0.45795	0.0843449	3		0.44092	0.0691296	3			0.583		0.316268	0.0286407	3		0.337201	0.0243528	3			0.583		0.288284	0.0371856	3		0.267138	0.0014552	3
0.6		0.573995	0.0262217	3		0.722141	0.0484328	3			0.6		0.447962	0.0901795	3		0.440873	0.0753018	3			0.6		0.314587	0.0129653	3		0.315248	0.00180456	3			0.6		0.270534	0.0505124	3		0.240386	0.00890101	3
0.617		0.584969	0.0269541	3		0.726022	0.0383149	3			0.617		0.43232	0.0959217	3		0.409426	0.0465494	3			0.617		0.300762	0.0235709	3		0.299888	0.0350093	3			0.617		0.301942	0.0442131	3		0.235331	0.00466586	3
0.633		0.573659	0.0257485	3		0.693524	0.0237739	3			0.633		0.441204	0.0905435	3		0.422902	0.0742165	3			0.633		0.313062	0.0122171	3		0.311041	0.0311351	3			0.633		0.249263	0.0512326	3		0.270453	0.0252785	3
0.65		0.572427	0.0231612	3		0.669216	0.0326	3			0.65		0.429993	0.0956132	3		0.412659	0.0734729	3			0.65		0.270289	0.00768605	3		0.318877	0.0150627	3			0.65		0.296781	0.0374459	3		0.247273	0.0221138	3
0.667		0.543084	0.0319956	3		0.694358	0.0372473	3			0.667		0.42465	0.0980164	3		0.396522	0.0742782	3			0.667		0.29754	0.0206895	3		0.325856	0.0182556	3			0.667		0.246989	0.056727	3		0.240124	0.0041884	3
0.683		0.550434	0.0357743	3		0.707227	0.0489383	3			0.683		0.436423	0.0789387	3		0.431356	0.0683624	3			0.683		0.309517	0.0139821	3		0.297296	0.0180391	3			0.683		0.253003	0.0522116	3		0.209986	0.0250121	3
0.7		0.544132	0.0311214	3		0.656032	0.0432818	3			0.7		0.421611	0.080761	3		0.412791	0.0790004	3			0.7		0.279562	0.0343318	3		0.308727	0.0266019	3			0.7		0.247601	0.0437575	3		0.246708	0.0179812	3
0.717		0.556199	0.0320013	3		0.679473	0.0343295	3			0.717		0.410379	0.0930536	3		0.405748	0.0753651	3			0.717		0.252968	0.0255386	3		0.307842	0.0272372	3			0.717		0.25293	0.0572323	3		0.236941	0.0154391	3
0.733		0.523836	0.0409083	3		0.709741	0.00731115	3			0.733		0.399511	0.0956155	3		0.374943	0.070315	3			0.733		0.27074	0.0174033	3		0.291885	0.0234179	3			0.733		0.262396	0.0294129	3		0.237663	0.0240562	3
0.75		0.51515	0.0366604	3		0.686785	0.0412889	3			0.75		0.401872	0.0805691	3		0.379978	0.0559875	3			0.75		0.291534	0.0192855	3		0.292993	0.0257647	3			0.75		0.239186	0.0436776	3		0.226937	0.0061532	3
0.767		0.516187	0.03401	3		0.603738	0.090207	3			0.767		0.387525	0.0889559	3		0.348654	0.0492618	3			0.767		0.278442	0.0272512	3		0.298234	0.027007	3			0.767		0.252117	0.0249332	3		0.206017	0.0112976	3
0.783		0.522512	0.0355882	3		0.702362	0.0424508	3			0.783		0.408413	0.0714292	3		0.369683	0.0706752	3			0.783		0.270318	0.0232056	3		0.290051	0.01519	3			0.783		0.241275	0.0404593	3		0.224378	0.00998183	3
0.8		0.524256	0.0372685	3		0.630947	0.052541	3			0.8		0.391446	0.0792565	3		0.341427	0.0648742	3			0.8		0.246217	0.0142726	3		0.281253	0.0181757	3			0.8		0.258888	0.0405707	3		0.225298	0.0185103	3
0.817		0.516371	0.0325571	3		0.61373	0.0642491	3			0.817		0.382055	0.0900264	3		0.371717	0.0546539	3			0.817		0.26443	0.0191676	3		0.277167	0.0256554	3			0.817		0.254532	0.044916	3		0.220893	0.00874413	3
0.833		0.510099	0.022251	3		0.605052	0.066899	3			0.833		0.390283	0.0761606	3		0.34881	0.0645731	3			0.833		0.282757	0.0366116	3		0.285638	0.0174893	3			0.833		0.255168	0.0364459	3		0.213875	0.00308259	3
0.85		0.512545	0.0267766	3		0.63472	0.0446519	3			0.85		0.385643	0.0791875	3		0.364363	0.055468	3			0.85		0.270133	0.026127	3		0.287016	0.0308191	3			0.85		0.230252	0.0449389	3		0.233669	0.00642625	3
0.867		0.5053	0.0291244	3		0.680897	0.0722949	3			0.867		0.379639	0.0826049	3		0.375839	0.078842	3			0.867		0.256908	0.0222959	3		0.28	0.0289735	3			0.867		0.238538	0.0392952	3		0.208874	0.0057098	3
0.883		0.507998	0.0150267	3		0.637927	0.0639622	3			0.883		0.36481	0.0887078	3		0.3669	0.0868184	3			0.883		0.261332	0.025426	3		0.284292	0.0258518	3			0.883		0.221832	0.0613861	3		0.210654	0.00800045	3
0.9		0.482039	0.0236154	3		0.660029	0.0200991	3			0.9		0.371057	0.0744564	3		0.351455	0.073492	3			0.9		0.242857	0.00953458	3		0.271284	0.0332171	3			0.9		0.223623	0.0539241	3		0.2062	0.0111252	3
0.917		0.470835	0.0259762	3		0.609443	0.0470817	3			0.917		0.366225	0.0781217	3		0.322977	0.0647099	3			0.917		0.279252	0.0151674	3		0.281291	0.0173428	3			0.917		0.244561	0.02864	3		0.205634	0.00749299	3
0.933		0.470028	0.0250874	3		0.649679	0.0758548	3			0.933		0.364313	0.0754777	3		0.381314	0.103653	3			0.933		0.269756	0.00680393	3		0.271999	0.0127677	3			0.933		0.226071	0.0346056	3		0.212241	0.0225008	3
0.95		0.469585	0.0212214	3		0.622207	0.0589017	3			0.95		0.349773	0.0856885	3		0.366205	0.0916308	3			0.95		0.264688	0.00819029	3		0.286158	0.0298242	3			0.95		0.224367	0.0318602	3		0.211893	0.0128129	3
0.967		0.46489	0.0249717	3		0.68603	0.0254594	3			0.967		0.359722	0.0741591	3		0.356618	0.089725	3			0.967		0.242835	0.0152864	3		0.282693	0.0176601	3			0.967		0.223582	0.0397087	3		0.200088	0.0145622	3
0.983		0.457837	0.0305499	3		0.625637	0.0584882	3			0.983		0.350926	0.0826835	3		0.331727	0.0839787	3			0.983		0.239993	0.00255953	3		0.263432	0.0242191	3			0.983		0.220721	0.0307842	3		0.199147	0.0153724	3
1		0.471432	0.0259378	3		0.601296	0.0422236	3			1		0.345191	0.0819298	3		0.34114	0.0784174	3			1		0.24247	0.0268083	3		0.258411	0.0259359	3			1		0.231431	0.0408808	3		0.231658	0.00498346	3
1.017		0.458508	0.0207957	3		0.599487	0.0523752	3			1.017		0.342275	0.0851984	3		0.32967	0.0907674	3			1.017		0.253597	0.0209616	3		0.251342	0.0306118	3			1.017		0.257732	0.0263557	3		0.215957	0.0110433	3
1.033		0.463143	0.014295	3		0.59424	0.0536103	3			1.033		0.345594	0.0725842	3		0.344829	0.107976	3			1.033		0.253346	0.0237041	3		0.262421	0.024089	3			1.033		0.225488	0.0435455	3		0.207332	0.00978729	3
1.05		0.442361	0.0253727	3		0.565814	0.073231	3			1.05		0.332404	0.0843353	3		0.350633	0.091752	3			1.05		0.216882	0.00990245	3		0.253751	0.0252035	3			1.05		0.241152	0.035478	3		0.196675	0.0205139	3
1.067		0.461306	0.0214299	3		0.60105	0.0405407	3			1.067		0.337177	0.0801135	3		0.347912	0.0959571	3			1.067		0.212194	0.0270033	3		0.256363	0.0104709	3			1.067		0.21801	0.0353025	3		0.211084	0.00804394	3
1.083		0.445082	0.0270004	3		0.565998	0.0665273	3			1.083		0.334018	0.0819201	3		0.347074	0.0975	3			1.083		0.240004	0.0164647	3		0.244085	0.0261829	3			1.083		0.211612	0.0364589	3		0.209765	0.0119416	3
1.1		0.42958	0.0262091	3		0.621526	0.0459179	3			1.1		0.327147	0.0814826	3		0.334451	0.0749002	3			1.1		0.239586	0.0301371	3		0.25148	0.0224388	3			1.1		0.208809	0.0420392	3		0.201839	0.0211125	3
1.117		0.432219	0.0215389	3		0.575557	0.0430723	3			1.117		0.33291	0.0632152	3		0.325887	0.0918779	3			1.117		0.211581	0.0143468	3		0.253299	0.0189254	3			1.117		0.221142	0.03548	3		0.184157	0.0129299	3
1.133		0.431346	0.0268586	3		0.580236	0.050549	3			1.133		0.330282	0.0723305	3		0.32199	0.0833923	3			1.133		0.21136	0.0107002	3		0.237241	0.0298944	3			1.133		0.237064	0.0329898	3		0.196919	0.00817015	3
1.15		0.448091	0.0187826	3		0.555457	0.068049	3			1.15		0.317756	0.0683244	3		0.347793	0.0879941	3			1.15		0.229907	0.0179888	3		0.243031	0.0213469	3			1.15		0.230645	0.0361439	3		0.189104	0.0176175	3
1.167		0.434217	0.0233051	3		0.562526	0.0839121	3			1.167		0.318064	0.0648819	3		0.337218	0.101774	3			1.167		0.216747	0.0144174	3		0.244197	0.0300668	3			1.167		0.213703	0.0349477	3		0.198165	0.018988	3
1.183		0.441198	0.00868681	3		0.578831	0.0470658	3			1.183		0.318674	0.0642005	3		0.339474	0.0992668	3			1.183		0.225895	0.0293562	3		0.247834	0.0137784	3			1.183		0.221187	0.0284255	3		0.186591	0.0100262	3
1.2		0.4386	0.0133323	3		0.563098	0.0460229	3			1.2		0.313522	0.0684177	3		0.334197	0.0872738	3			1.2		0.209246	0.00845468	3		0.257661	0.0157999	3			1.2		0.219678	0.0459793	3		0.188683	0.0103873	3
1.217		0.42502	0.0167896	3		0.560099	0.0558096	3			1.217		0.313619	0.0725555	3		0.344155	0.0991563	3			1.217		0.223735	0.0259793	3		0.257698	0.0224543	3			1.217		0.207264	0.0391386	3		0.1989	0.0159139	3
1.233		0.407879	0.0267025	3		0.586764	0.0187819	3			1.233		0.316141	0.0667442	3		0.330366	0.0885861	3			1.233		0.242268	0.0311421	3		0.240085	0.0211692	3			1.233		0.20107	0.0381876	3		0.182715	0.00349954	3
1.25		0.424001	0.0133035	3		0.517353	0.0655751	3			1.25		0.315078	0.0615158	3		0.325145	0.10242	3			1.25		0.231556	0.0326202	3		0.24301	0.0158422	3			1.25		0.20756	0.0434768	3		0.200867	0.0120541	3
1.267		0.418639	0.0155026	3		0.559935	0.0639695	3			1.267		0.306707	0.0726646	3		0.31482	0.0849151	3			1.267		0.21027	0.0289796	3		0.247156	0.0245337	3			1.267		0.189006	0.0448758	3		0.191029	0.0192818	3
1.283		0.410385	0.0198854	3		0.525317	0.0296383	3			1.283		0.294915	0.0749093	3		0.349181	0.112441	3			1.283		0.215739	0.0139896	3		0.239361	0.0193118	3			1.283		0.219502	0.0231644	3		0.182379	0.0166806	3
1.3		0.40406	0.0180513	3		0.539536	0.0492113	3			1.3		0.303079	0.0635549	3		0.327096	0.0963694	3			1.3		0.246351	0.0445946	3		0.23556	0.0129642	3			1.3		0.208187	0.031083	3		0.193872	0.00625574	3
1.317		0.408494	0.0151315	3		0.565065	0.0581781	3			1.317		0.309937	0.0617051	3		0.346346	0.103523	3			1.317		0.230617	0.0410729	3		0.220812	0.0216742	3			1.317		0.235453	0.0300127	3		0.180869	0.00349943	3
1.333		0.392143	0.0189004	3		0.531936	0.0864128	3			1.333		0.295478	0.0636113	3		0.321994	0.087417	3			1.333		0.230992	0.0302934	3		0.224366	0.0172557	3			1.333		0.161183	0.0598765	3		0.19588	0.00253822	3
1.35		0.388041	0.0157997	3		0.544109	0.0604575	3			1.35		0.296742	0.0683322	3		0.332939	0.104525	3			1.35		0.212271	0.0475066	3		0.232723	0.0225451	3			1.35		0.21152	0.0222542	3		0.172308	0.0157782	3
1.367		0.38452	0.012337	3		0.528689	0.058575	3			1.367		0.299867	0.0567935	3		0.3367	0.106011	3			1.367		0.213981	0.0204847	3		0.234272	0.010708	3			1.367		0.188863	0.0383132	3		0.168165	0.00746859	3
1.383		0.395269	0.0096497	3		0.537574	0.0664421	3			1.383		0.290451	0.0644226	3		0.322393	0.0875402	3			1.383		0.227077	0.0401059	3		0.230865	0.0256918	3			1.383		0.189731	0.0380748	3		0.172107	0.00959661	3
1.4		0.374247	0.0107993	3		0.529079	0.0783756	3			1.4		0.28018	0.0744052	3		0.315393	0.106654	3			1.4		0.221206	0.0261773	3		0.242175	0.0153041	3			1.4		0.209144	0.0316686	3		0.174373	0.0153912	3
1.417		0.379719	0.00495163	3		0.564784	0.0482468	3			1.417		0.290021	0.0625369	3		0.343425	0.111642	3			1.417		0.210366	0.0289627	3		0.226854	0.019001	3			1.417		0.185297	0.0457654	3		0.165399	0.0101744	3
1.433		0.385124	0.00853849	3		0.541983	0.07008	3			1.433		0.293555	0.0519362	3		0.338084	0.110719	3			1.433		0.222034	0.0285707	3		0.233953	0.00569799	3			1.433		0.197523	0.0370918	3		0.180751	0.0192881	3
1.45		0.392131	0.00659427	3		0.550096	0.0595444	3			1.45		0.274437	0.0692214	3		0.339759	0.114417	3			1.45		0.19918	0.0094655	3		0.220356	0.0120251	3			1.45		0.203432	0.031041	3		0.177327	0.0196618	3
1.467		0.378556	0.00596151	3		0.533663	0.0701016	3			1.467		0.280563	0.0564949	3		0.295618	0.097243	3			1.467		0.202728	0.0143046	3		0.226405	0.0106277	3			1.467		0.203124	0.034986	3		0.173298	0.0113698	3
1.483		0.368452	0.00848503	3		0.507755	0.0517096	3			1.483		0.277106	0.0577113	3		0.327522	0.108091	3			1.483		0.207298	0.0164881	3		0.226554	0.016476	3			1.483		0.197824	0.0326393	3		0.1759	0.0131091	3
1.5		0.365264	0.0105817	3		0.522068	0.0817445	3			1.5		0.270783	0.0560214	3		0.312422	0.106999	3			1.5		0.207376	0.0150119	3		0.225847	0.0195056	3			1.5		0.186135	0.0285694	3		0.160294	0.0106322	3
1.517		0.374452	0.00572623	3		0.536416	0.05151	3			1.517		0.276703	0.0532541	3		0.309869	0.115692	3			1.517		0.192346	0.0154138	3		0.220534	0.0147924	3			1.517		0.198572	0.0265525	3		0.163553	0.00669581	3
1.533		0.373716	0.00543248	3		0.553691	0.0511001	3			1.533		0.26039	0.0618831	3		0.308238	0.100748	3			1.533		0.206332	0.02332	3		0.210426	0.0198523	3			1.533		0.210184	0.0359861	3		0.17289	0.00455274	3
1.55		0.36324	0.0120869	3		0.511951	0.0409981	3			1.55		0.289669	0.0414295	3		0.30908	0.0992633	3			1.55		0.188144	0.0218347	3		0.222064	0.0162164	3			1.55		0.217148	0.0322095	3		0.176293	0.0214888	3
1.567		0.359594	0.0149376	3		0.493726	0.0714421	3			1.567		0.261361	0.0622324	3		0.316234	0.114117	3			1.567		0.184326	0.0174472	3		0.227478	0.0179727	3			1.567		0.210371	0.0309443	3		0.169609	0.00883653	3
1.583		0.359502	0.00872832	3		0.498714	0.0543627	3			1.583		0.276851	0.0516648	3		0.31732	0.102699	3			1.583		0.181993	0.0127486	3		0.211378	0.0182039	3			1.583		0.199989	0.0307091	3		0.15419	0.00740493	3
1.6		0.358608	0.00968339	3		0.509984	0.058866	3			1.6		0.267492	0.0565574	3		0.312644	0.109097	3			1.6		0.205258	0.0312959	3		0.223055	0.0202935	3			1.6		0.165055	0.0350248	3		0.169511	0.00724372	3
1.617		0.352861	0.00845991	3		0.50883	0.0665536	3			1.617		0.265115	0.0558044	3		0.306811	0.102367	3			1.617		0.172923	0.00485829	3		0.223423	0.0138034	3			1.617		0.192207	0.0319078	3		0.157009	0.0128517	3
1.633		0.348465	0.00469027	3		0.485547	0.0501119	3			1.633		0.267294	0.0520347	3		0.320046	0.11314	3			1.633		0.191509	0.0284761	3		0.201889	0.0225343	3			1.633		0.182934	0.0479276	3		0.16477	0.0110149	3
1.65		0.334347	0.0107452	3		0.488552	0.073057	3			1.65		0.256211	0.0562294	3		0.308531	0.108051	3			1.65		0.183453	0.0205796	3		0.230673	0.0298586	3			1.65		0.175051	0.0345155	3		0.165408	0.0130549	3
1.667		0.341734	0.00627051	3		0.485526	0.05879	3			1.667		0.256924	0.0566384	3		0.317535	0.0965392	3			1.667		0.187287	0.0321439	3		0.205227	0.0305699	3			1.667		0.206979	0.0260124	3		0.170762	0.0136744	3
1.683		0.346376	0.00570785	3		0.557006	0.0501921	3			1.683		0.254478	0.0517106	3		0.311417	0.101487	3			1.683		0.17524	0.0259677	3		0.208859	0.0209398	3			1.683		0.206891	0.0242591	3		0.166614	0.012123	3
1.7		0.328056	0.00889547	3		0.494073	0.0458462	3			1.7		0.250638	0.0493068	3		0.327993	0.109606	3			1.7		0.205752	0.0263907	3		0.217677	0.0206262	3			1.7		0.198194	0.0208462	3		0.17443	0.0088646	3
1.717		0.329111	0.0115952	3		0.538108	0.0507932	3			1.717		0.248598	0.0492258	3		0.299219	0.092084	3			1.717		0.19327	0.0233135	3		0.225446	0.00640466	3			1.717		0.200706	0.0206232	3		0.160955	0.00567152	3
1.733		0.335177	0.00671316	3		0.502192	0.0364213	3			1.733		0.259093	0.0354033	3		0.310885	0.108504	3			1.733		0.21039	0.0223696	3		0.215412	0.0265028	3			1.733		0.192824	0.0237613	3		0.153423	0.0126898	3
1.75		0.32986	0.00893331	3		0.509041	0.049377	3			1.75		0.25193	0.0398479	3		0.286916	0.0815573	3			1.75		0.188288	0.019237	3		0.215192	0.0280083	3			1.75		0.179866	0.0319275	3		0.145063	0.009733	3
1.767		0.321848	0.00847296	3		0.535098	0.0752704	3			1.767		0.247219	0.0442779	3		0.338891	0.112433	3			1.767		0.172837	0.00674989	3		0.212903	0.024154	3			1.767		0.179737	0.0253824	3		0.16782	0.0112542	3
1.783		0.328862	0.00643071	3		0.471602	0.0633917	3			1.783		0.238908	0.0500257	3		0.319185	0.105289	3			1.783		0.18488	0.028726	3		0.225748	0.0239696	3			1.783		0.167093	0.0245005	3		0.156665	0.00981327	3
1.8		0.333516	0.00785465	3		0.498531	0.0571814	3			1.8		0.241179	0.0416232	3		0.327248	0.112281	3			1.8		0.201053	0.023218	3		0.212052	0.0200943	3			1.8		0.176524	0.0360648	3		0.162055	0.0106791	3
1.817		0.320124	0.00510563	3		0.488726	0.0310644	3			1.817		0.241301	0.0473269	3		0.307597	0.0999656	3			1.817		0.179462	0.0207461	3		0.222576	0.0201766	3			1.817		0.15451	0.0328033	3		0.155701	0.0118936	3
1.833		0.32693	0.00738752	3		0.512971	0.044282	3			1.833		0.233398	0.0468474	3		0.291127	0.0875187	3			1.833		0.185054	0.0319325	3		0.203677	0.0295492	3			1.833		0.179833	0.0280424	3		0.164269	0.022782	3
1.85		0.299058	0.00738813	3		0.490113	0.059314	3			1.85		0.238147	0.0433596	3		0.309101	0.10584	3			1.85		0.19606	0.0268105	3		0.202046	0.0171341	3			1.85		0.150738	0.0269212	3		0.155384	0.00781199	3
1.867		0.33507	0.0151345	3		0.52599	0.0620425	3			1.867		0.2285	0.0465286	3		0.282487	0.0981405	3			1.867		0.196895	0.0141419	3		0.204884	0.0215373	3			1.867		0.191689	0.0332662	3		0.136565	0.0131053	3
1.883		0.335768	0.00618288	3		0.49632	0.062337	3			1.883		0.235008	0.0387023	3		0.276416	0.0877156	3			1.883		0.168403	0.00404748	3		0.200642	0.0218906	3			1.883		0.190541	0.0171625	3		0.144405	0.00651449	3
1.9		0.322691	0.0148921	3		0.509735	0.037601	3			1.9		0.228658	0.0399004	3		0.303842	0.090547	3			1.9		0.202988	0.024107	3		0.202102	0.0267344	3			1.9		0.198258	0.0298292	3		0.152875	0.00803608	3
1.917		0.303893	0.00356722	3		0.516431	0.0523882	3			1.917		0.227628	0.034343	3		0.278505	0.0804151	3			1.917		0.177512	0.0181881	3		0.208306	0.0215915	3			1.917		0.191941	0.0176909	3		0.154696	0.0133509	3
1.933		0.31887	0.0125444	3		0.478901	0.0635102	3			1.933		0.2287	0.043096	3		0.293081	0.0950191	3			1.933		0.184386	0.0150302	3		0.195664	0.0227599	3			1.933		0.158233	0.0499934	3		0.16515	0.00851271	3
1.95		0.312282	0.00538644	3		0.502389	0.0685666	3			1.95		0.222136	0.0413895	3		0.291636	0.102851	3			1.95		0.170329	0.0248871	3		0.204832	0.0142846	3			1.95		0.187016	0.0286312	3		0.168396	0.0127747	3
1.967		0.314955	0.00842445	3		0.45346	0.0793207	3			1.967		0.227381	0.0306729	3		0.286235	0.102921	3			1.967		0.182356	0.0293721	3		0.201419	0.0238738	3			1.967		0.18769	0.0241348	3		0.153997	0.0208406	3
1.983		0.289272	0.00823209	3		0.478855	0.0510329	3			1.983		0.219895	0.0410594	3		0.304778	0.109389	3			1.983		0.152293	0.00727832	3		0.19705	0.0309419	3			1.983		0.157796	0.0280456	3		0.151632	0.0187438	3
2		0.300925	0.00494879	3		0.466728	0.0527465	3			2		0.212979	0.042867	3		0.272148	0.100527	3			2		0.175097	0.0256528	3		0.196615	0.0224106	3			2		0.187541	0.0315248	3		0.145405	0.00716766	3
2.017		0.301784	0.00775687	3		0.497615	0.0635969	3			2.017		0.214931	0.040559	3		0.272377	0.0806816	3			2.017		0.187028	0.0349853	3		0.198812	0.0307945	3			2.017		0.159179	0.0261652	3		0.165942	0.0101642	3
2.033		0.287935	0.00961468	3		0.48288	0.0720254	3			2.033		0.216167	0.0373064	3		0.317641	0.116971	3			2.033		0.197873	0.0168695	3		0.189078	0.0242078	3			2.033		0.151806	0.0298117	3		0.151072	0.0143046	3
2.05		0.295072	0.00923775	3		0.515574	0.0328049	3			2.05		0.209864	0.0379916	3		0.307854	0.110708	3			2.05		0.170832	0.0268112	3		0.206	0.029813	3			2.05		0.198359	0.0180504	3		0.163808	0.020419	3
2.067		0.286243	0.00818603	3		0.486761	0.066852	3			2.067		0.209821	0.0347609	3		0.303179	0.116231	3			2.067		0.168284	0.0209583	3		0.205656	0.0235776	3			2.067		0.165426	0.0334803	3		0.157776	0.00148023	3
2.083		0.294156	0.0156996	3		0.475147	0.0886204	3			2.083		0.211353	0.0434414	3		0.291111	0.099002	3			2.083		0.17676	0.0353424	3		0.190007	0.0173099	3			2.083		0.200579	0.0147701	3		0.14114	0.00838164	3
2.1		0.291283	0.014037	3		0.49963	0.0655085	3			2.1		0.212854	0.0318797	3		0.304166	0.099002	3			2.1		0.193125	0.0344779	3		0.194606	0.0298613	3			2.1		0.184229	0.0342678	3		0.142166	0.0194571	3
2.117		0.300951	0.0187219	3		0.514079	0.0569714	3			2.117		0.199209	0.0449881	3		0.27455	0.0865156	3			2.117		0.197975	0.022076	3		0.195627	0.025333	3			2.117		0.202252	0.0372829	3		0.149958	0.00229383	3
2.133		0.281533	0.00309721	3		0.486105	0.083978	3			2.133		0.209179	0.0341286	3		0.318973	0.119735	3			2.133		0.182001	0.0169618	3		0.18586	0.024258	3			2.133		0.141757	0.0442037	3		0.144645	0.0129655	3
2.15		0.276326	0.0126358	3		0.479973	0.0664965	3			2.15		0.20713	0.0389159	3		0.28757	0.0928727	3			2.15		0.195853	0.0396553	3		0.182917	0.0236566	3			2.15		0.149555	0.019551	3		0.149745	0.0099729	3
2.167		0.285374	0.0130405	3		0.502355	0.0547433	3			2.167		0.198497	0.0390556	3		0.280411	0.0915607	3			2.167		0.166351	0.0117407	3		0.192688	0.0129356	3			2.167		0.149606	0.0351566	3		0.145196	0.00677181	3
2.183		0.289196	0.014961	3		0.514554	0.0486774	3			2.183		0.202011	0.0343874	3		0.277051	0.0948701	3			2.183		0.201216	0.0353648	3		0.179235	0.0168823	3			2.183		0.175857	0.0287639	3		0.133235	0.0150245	3
2.2		0.287808	0.0127943	3		0.477578	0.0762151	3			2.2		0.191662	0.0373748	3		0.285796	0.0954414	3			2.2		0.167587	0.0118777	3		0.180401	0.0145229	3			2.2		0.148675	0.0381484	3		0.139733	0.0250688	3
2.217		0.282406	0.0135019	3		0.54266	0.0469885	3			2.217		0.204913	0.0307361	3		0.278685	0.083125	3			2.217		0.175563	0.0171368	3		0.176307	0.0218391	3			2.217		0.169716	0.0216498	3		0.137859	0.0160848	3
2.233		0.284447	0.0119082	3		0.456749	0.0687329	3			2.233		0.206708	0.0272449	3		0.283025	0.0934154	3			2.233		0.153509	0.0173876	3		0.202239	0.0271316	3			2.233		0.159344	0.0239553	3		0.132441	0.00951057	3
2.25		0.272157	0.0089163	3		0.476333	0.047412	3			2.25		0.198806	0.0306863	3		0.312517	0.125087	3			2.25		0.199654	0.0376949	3		0.178068	0.0253854	3			2.25		0.155061	0.0172237	3		0.13317	0.0202151	3
2.267		0.277027	0.00796472	3		0.459132	0.0608274	3			2.267		0.197541	0.0338059	3		0.313376	0.123832	3			2.267		0.152583	0.020107	3		0.179961	0.0198391	3			2.267		0.168512	0.0209241	3		0.140496	0.00765294	3
2.283		0.26994	0.0147167	3		0.488231	0.0325765	3			2.283		0.189002	0.0341092	3		0.294337	0.115535	3			2.283		0.14652	0.0223096	3		0.184432	0.0162881	3			2.283		0.172955	0.0245257	3		0.147623	0.0145529	3
2.3		0.274746	0.0122918	3		0.511403	0.0385166	3			2.3		0.198025	0.0304171	3		0.289548	0.0880485	3			2.3		0.168049	0.0354863	3		0.163985	0.0143701	3			2.3		0.183202	0.0293347	3		0.137571	0.0122936	3
2.317		0.267096	0.0173503	3		0.455704	0.0574493	3			2.317		0.181756	0.0380015	3		0.287096	0.107777	3			2.317		0.153915	0.0335312	3		0.178616	0.00919078	3			2.317		0.171314	0.0223112	3		0.151984	0.00629911	3
2.333		0.277855	0.0135606	3		0.44137	0.0621471	3			2.333		0.196093	0.0264612	3		0.29284	0.121159	3			2.333		0.160941	0.0383987	3		0.176154	0.0204587	3			2.333		0.166627	0.0310799	3		0.147767	0.00892685	3
2.35		0.263867	0.00835377	3		0.501021	0.0499502	3			2.35		0.193007	0.0260264	3		0.304931	0.107377	3			2.35		0.162406	0.0261254	3		0.186328	0.0183715	3			2.35		0.166157	0.0240626	3		0.144429	0.0198511	3
2.367		0.268947	0.0106816	3		0.476429	0.0346288	3			2.367		0.186273	0.0319429	3		0.310685	0.118338	3			2.367		0.176963	0.0337618	3		0.183252	0.019199	3			2.367		0.151308	0.0260876	3		0.163064	0.0133388	3
2.383		0.260072	0.0151156	3		0.456235	0.03188	3			2.383		0.196162	0.024488	3		0.270733	0.095756	3			2.383		0.147964	0.0251295	3		0.174605	0.0195781	3			2.383		0.167462	0.0291311	3		0.143021	0.0148252	3
2.4		0.258951	0.0106033	3		0.495071	0.0471994	3			2.4		0.195148	0.0271937	3		0.287804	0.106086	3			2.4		0.175292	0.0308222	3		0.18108	0.0139569	3			2.4		0.158395	0.0364775	3		0.127103	0.0171129	3
2.417		0.260089	0.0107989	3		0.472452	0.0394824	3			2.417		0.184575	0.0269185	3		0.270322	0.0965805	3			2.417		0.179485	0.029525	3		0.17462	0.0147346	3			2.417		0.159644	0.0243575	3		0.161031	0.00233908	3
2.433		0.266069	0.0197372	3		0.436344	0.0337784	3			2.433		0.176007	0.0335949	3		0.282613	0.100064	3			2.433		0.195609	0.0272414	3		0.169436	0.020008	3			2.433		0.156621	0.0280903	3		0.160126	0.0076103	3
2.45		0.252168	0.0173561	3		0.477249	0.0806092	3			2.45		0.18809	0.0252073	3		0.290716	0.091852	3			2.45		0.175154	0.0305044	3		0.167363	0.0176667	3			2.45		0.152651	0.0274742	3		0.168517	0.00708638	3
2.467		0.25468	0.0178584	3		0.491635	0.0369489	3			2.467		0.184024	0.0263306	3		0.283902	0.102094	3			2.467		0.173508	0.0250794	3		0.173908	0.0154163	3			2.467		0.11916	0.0388654	3		0.132765	0.0071211	3
2.483		0.260818	0.0147658	3		0.467716	0.0402568	3			2.483		0.179528	0.0267455	3		0.276359	0.0841993	3			2.483		0.184253	0.00509772	3		0.159641	0.0264983	3			2.483		0.148058	0.041688	3		0.145709	0.0107683	3
2.5		0.243106	0.00858361	3		0.476	0.0364185	3			2.5		0.181835	0.0270929	3		0.292484	0.0900595	3			2.5		0.202873	0.0286611	3		0.162875	0.0155122	3			2.5		0.132235	0.036791	3		0.131878	0.011014	3
2.517		0.24769	0.0108549	3		0.433016	0.0704983	3			2.517		0.189377	0.0240786	3		0.276516	0.0991888	3			2.517		0.174853	0.0251661	3		0.175561	0.0182203	3			2.517		0.148254	0.0224096	3		0.144715	0.0109808	3
2.533		0.260653	0.0193525	3		0.447511	0.0684016	3			2.533		0.170019	0.030575	3		0.270615	0.079279	3			2.533		0.186971	0.0439774	3		0.170825	0.0151736	3			2.533		0.187372	0.0411397	3		0.141402	0.0157071	3
2.55		0.24729	0.0218213	3		0.417788	0.0505983	3			2.55		0.17648	0.0267098	3		0.276365	0.0846676	3			2.55		0.175948	0.0218526	3		0.166361	0.0117609	3			2.55		0.148141	0.03348	3		0.164372	0.0138849	3
2.567		0.245902	0.0164834	3		0.453575	0.057353	3			2.567		0.170674	0.0239009	3		0.281905	0.0976722	3			2.567		0.176159	0.0293111	3		0.169904	0.0173517	3			2.567		0.143032	0.0238244	3		0.156595	0.0137038	3
2.583		0.234997	0.00857673	3		0.422181	0.059163	3			2.583		0.16706	0.0276644	3		0.280578	0.10432	3			2.583		0.172722	0.0198666	3		0.170957	0.0200118	3			2.583		0.120252	0.0284818	3		0.138021	0.00710449	3
2.6		0.242778	0.0190569	3		0.430456	0.0574086	3			2.6		0.172625	0.0250767	3		0.293378	0.103258	3			2.6		0.18629	0.0408852	3		0.182603	0.0151545	3			2.6		0.148708	0.0290578	3		0.127148	0.0173213	3
2.617		0.233578	0.0140288	3		0.45699	0.038141	3			2.617		0.172255	0.0229786	3		0.265553	0.0891767	3			2.617		0.177808	0.0334417	3		0.154926	0.0211853	3			2.617		0.142526	0.0323106	3		0.141208	0.0167837	3
2.633		0.249899	0.0184017	3		0.473295	0.0696574	3			2.633		0.180451	0.0192929	3		0.274274	0.0981974	3			2.633		0.165554	0.0258909	3		0.171967	0.0225193	3			2.633		0.141898	0.0332994	3		0.133258	0.0250165	3
2.65		0.243443	0.0142925	3		0.43876	0.0701681	3			2.65		0.171439	0.0260601	3		0.251476	0.079997	3			2.65		0.18074	0.0400362	3		0.162084	0.0109859	3			2.65		0.120997	0.0353458	3		0.148954	0.0221648	3
2.667		0.236228	0.0206782	3		0.440661	0.0584981	3			2.667		0.174266	0.0225229	3		0.286116	0.100483	3			2.667		0.181896	0.0375997	3		0.168464	0.0158854	3			2.667		0.129423	0.0263426	3		0.130971	0.0210114	3
2.683		0.235888	0.0141506	3		0.469334	0.0448387	3			2.683		0.174521	0.0205312	3		0.26262	0.0994635	3			2.683		0.177643	0.027312	3		0.168344	0.0127636	3			2.683		0.132186	0.028999	3		0.134534	0.0136791	3
2.7		0.245464	0.0217251	3		0.466862	0.0584658	3			2.7		0.17702	0.0234819	3		0.278781	0.101306	3			2.7		0.159302	0.0198069	3		0.169109	0.0249605	3			2.7		0.148352	0.0270807	3		0.12081	0.0193279	3
2.717		0.235685	0.0150253	3		0.428267	0.0599783	3			2.717		0.159293	0.0276203	3		0.289712	0.100063	3			2.717		0.165074	0.0186505	3		0.169201	0.0100642	3			2.717		0.138353	0.0250325	3		0.134579	0.0152254	3
2.733		0.228136	0.0160034	3		0.46339	0.0233525	3			2.733		0.173261	0.0216116	3		0.244407	0.0870969	3			2.733		0.177455	0.0383898	3		0.162267	0.0185293	3			2.733		0.146977	0.0186195	3		0.119231	0.0186532	3
2.75		0.226192	0.0147672	3		0.503993	0.0527744	3			2.75		0.172536	0.0161134	3		0.262089	0.0983446	3			2.75		0.191815	0.0354336	3		0.169723	0.0114827	3			2.75		0.133918	0.0250023	3		0.122283	0.0110638	3
2.767		0.230444	0.015612	3		0.434711	0.0499646	3			2.767		0.173769	0.0176199	3		0.252537	0.0866623	3			2.767		0.14855	0.0211918	3		0.158649	0.0153054	3			2.767		0.128349	0.0281777	3		0.138249	0.017409	3
2.783		0.226954	0.0199861	3		0.442977	0.0386686	3			2.783		0.177346	0.0102	3		0.26106	0.0887291	3			2.783		0.156784	0.0260485	3		0.159811	0.0156666	3			2.783		0.142352	0.0283719	3		0.125669	0.0120557	3
2.8		0.228739	0.015055	3		0.477109	0.0522695	3			2.8		0.163859	0.016685	3		0.284286	0.0960706	3			2.8		0.171981	0.0175548	3		0.156977	0.0099146	3			2.8		0.158694	0.0239262	3		0.132575	0.00300056	3
2.817		0.229312	0.02106	3		0.463795	0.0467586	3			2.817		0.170109	0.0190106	3		0.270103	0.0960794	3			2.817		0.190631	0.0473442	3		0.16006	0.0118033	3			2.817		0.125877	0.0264425	3		0.133503	0.0139219	3
2.833		0.22636	0.0204392	3		0.464833	0.0538666	3			2.833		0.167133	0.0174998	3		0.272001	0.0904849	3			2.833		0.156013	0.0264448	3		0.161522	0.0231233	3			2.833		0.127245	0.0178838	3		0.125165	0.0245956	3
2.85		0.237096	0.0252138	3		0.460224	0.0558175	3			2.85		0.162113	0.0185614	3		0.272736	0.0778518	3			2.85		0.169225	0.021535	3		0.154778	0.0129572	3			2.85		0.146612	0.0316303	3		0.139928	0.0222277	3
2.867		0.224879	0.0169678	3		0.466385	0.055493	3			2.867		0.158838	0.0150676	3		0.257514	0.0892898	3			2.867		0.172417	0.0187154	3		0.160037	0.0267853	3			2.867		0.134654	0.0295481	3		0.14401	0.0172606	3
2.883		0.229093	0.0223422	3		0.427569	0.0717352	3			2.883		0.164848	0.0141153	3		0.2695	0.095434	3			2.883		0.184282	0.0240171	3		0.151694	0.0195666	3			2.883		0.148944	0.0344797	3		0.124415	0.0137361	3
2.9		0.232378	0.0276854	3		0.44026	0.0396197	3			2.9		0.161795	0.0205728	3		0.27805	0.0969334	3			2.9		0.152654	0.0366233	3		0.169456	0.022761	3			2.9		0.144723	0.0310343	3		0.130585	0.0142887	3
2.917		0.214524	0.0126561	3		0.485839	0.0532867	3			2.917		0.16215	0.0211634	3		0.26917	0.0814676	3			2.917		0.163332	0.0177452	3		0.161421	0.00878937	3			2.917		0.130487	0.0344618	3		0.135221	0.00889293	3
2.933		0.222509	0.0239216	3		0.446333	0.0466364	3			2.933		0.158035	0.0192095	3		0.261463	0.0893563	3			2.933		0.163209	0.0322838	3		0.175876	0.0218084	3			2.933		0.135877	0.0292164	3		0.132129	0.0190747	3
2.95		0.22546	0.0244229	3		0.444309	0.0710155	3			2.95		0.161085	0.015608	3		0.286551	0.104895	3			2.95		0.154006	0.0161633	3		0.16259	0.0149911	3			2.95		0.154273	0.0291224	3		0.124886	0.0119231	3
2.967		0.218524	0.0171214	3		0.453588	0.0363351	3			2.967		0.147224	0.021266	3		0.278742	0.10164	3			2.967		0.134141	0.0231026	3		0.151272	0.017017	3			2.967		0.163892	0.0367178	3		0.122904	0.015891	3
2.983		0.209747	0.0143226	3		0.48411	0.0550726	3			2.983		0.15719	0.0185616	3		0.283094	0.100833	3			2.983		0.152256	0.0221984	3		0.158196	0.012483	3			2.983		0.126786	0.0202365	3		0.139329	0.0115818	3
3		0.219424	0.0196494	3		0.444698	0.037235	3			3		0.156667	0.0198517	3		0.27795	0.104523	3			3		0.159348	0.0281038	3		0.159479	0.0148699	3			3		0.131378	0.031119	3		0.119905	0.0156688	3
3.017		0.22005	0.0241588	3		0.435055	0.0603411	3			3.017		0.153361	0.0210001	3		0.283927	0.127944	3			3.017		0.145509	0.016658	3		0.16087	0.0239002	3			3.017		0.148244	0.0313178	3		0.119265	0.0139508	3
3.033		0.224996	0.0273585	3		0.451463	0.0461478	3			3.033		0.147624	0.0187264	3		0.276619	0.113135	3			3.033		0.162392	0.0297736	3		0.155296	0.0168983	3			3.033		0.149997	0.0302495	3		0.123503	0.00840879	3
3.05		0.217961	0.0253086	3		0.435086	0.0670753	3			3.05		0.149541	0.0188414	3		0.284729	0.10423	3			3.05		0.15394	0.0274121	3		0.155398	0.0112148	3			3.05		0.123671	0.0353717	3		0.104421	0.020926	3
3.067		0.225431	0.0267327	3		0.472061	0.02363	3			3.067		0.150653	0.0153492	3		0.281752	0.10849	3			3.067		0.154676	0.0337007	3		0.159944	0.0102378	3			3.067		0.142791	0.0254412	3		0.132902	0.00924069	3
3.083		0.216829	0.0222196	3		0.468091	0.0427437	3			3.083		0.155062	0.0161521	3		0.27272	0.106885	3			3.083		0.157892	0.0290344	3		0.163987	0.0251305	3			3.083		0.147968	0.0351817	3		0.126539	0.000973213	3
3.1		0.207671	0.0247036	3		0.430552	0.0398896	3			3.1		0.142138	0.0222345	3		0.287386	0.106301	3			3.1		0.159778	0.0351068	3		0.157293	0.0108101	3			3.1		0.155445	0.0268831	3		0.122847	0.0188326	3
3.117		0.225053	0.0264897	3		0.459728	0.0665284	3			3.117		0.14917	0.0137675	3		0.27694	0.0991573	3			3.117		0.156692	0.0238443	3		0.158854	0.0109597	3			3.117		0.133277	0.0329309	3		0.133112	0.0103219	3
3.133		0.198486	0.0156771	3		0.441454	0.0640205	3			3.133		0.144234	0.0199198	3		0.283368	0.0863497	3			3.133		0.14932	0.0307482	3		0.163712	0.0275162	3			3.133		0.122497	0.0189802	3		0.106883	0.0161334	3
3.15		0.217906	0.0312312	3		0.44778	0.0641532	3			3.15		0.14513	0.0146195	3		0.260836	0.0851107	3			3.15		0.141869	0.0182134	3		0.152341	0.0190207	3			3.15		0.152925	0.034706	3		0.125394	0.0162519	3
3.167		0.204068	0.0204252	3		0.429273	0.0730749	3			3.167		0.145638	0.0168314	3		0.245544	0.0918424	3			3.167		0.154305	0.0141841	3		0.159538	0.00754363	3			3.167		0.130296	0.0240976	3		0.127427	0.0155105	3
3.183		0.221624	0.0345499	3		0.452607	0.0460767	3			3.183		0.143134	0.0160881	3		0.261138	0.0881698	3			3.183		0.162176	0.0245604	3		0.14981	0.0153704	3			3.183		0.13822	0.0318258	3		0.124897	0.00875783	3
3.2		0.218067	0.0316586	3		0.432977	0.044916	3			3.2		0.138999	0.0207428	3		0.272617	0.0839027	3			3.2		0.145574	0.0296197	3		0.152643	0.00561312	3			3.2		0.151495	0.0348311	3		0.103907	0.00724111	3
3.217		0.20911	0.0212932	3		0.45271	0.0444919	3			3.217		0.138834	0.0151884	3		0.283741	0.0977689	3			3.217		0.13063	0.00856404	3		0.140153	0.0194522	3			3.217		0.133408	0.0328214	3		0.122213	0.00635019	3
3.233		0.213795	0.0244348	3		0.399229	0.0720095	3			3.233		0.134943	0.0258591	3		0.275688	0.102136	3			3.233		0.168228	0.0353663	3		0.16612	0.0143503	3			3.233		0.135764	0.0266171	3		0.118552	0.0119662	3
3.25		0.206098	0.0259731	3		0.43668	0.0633848	3			3.25		0.145891	0.0177663	3		0.300018	0.103956	3			3.25		0.165007	0.0306616	3		0.155152	0.0167152	3			3.25		0.136185	0.0190368	3		0.132137	0.0192863	3
3.267		0.213989	0.0286305	3		0.403761	0.0589579	3			3.267		0.140398	0.0193677	3		0.288371	0.107702	3			3.267		0.152222	0.0430515	3		0.15831	0.0188757	3			3.267		0.118692	0.0304011	3		0.130102	0.0180153	3
3.283		0.198969	0.0205818	3		0.435527	0.0509946	3			3.283		0.150761	0.0164943	3		0.259404	0.0944723	3			3.283		0.147916	0.0244934	3		0.154405	0.0141633	3			3.283		0.104143	0.046925	3		0.116314	0.0181468	3
3.3		0.214487	0.0353579	3		0.4235	0.052825	3			3.3		0.141009	0.0181035	3		0.272025	0.0958676	3			3.3		0.171776	0.0343562	3		0.161184	0.0185676	3			3.3		0.146307	0.0373986	3		0.117759	0.0179476	3
3.317		0.199044	0.0245635	3		0.438913	0.0535457	3			3.317		0.143019	0.0194555	3		0.25985	0.100301	3			3.317		0.153653	0.0147887	3		0.149618	0.00342299	3			3.317		0.109481	0.03346	3		0.120837	0.0104386	3
3.333		0.209683	0.0266725	3		0.421108	0.0758907	3			3.333		0.14334	0.0195306	3		0.270928	0.0939509	3			3.333		0.149126	0.0223987	3		0.158261	0.0140242	3			3.333		0.141766	0.0304169	3		0.114242	0.0140712	3
3.35		0.195191	0.0227951	3		0.422478	0.0672922	3			3.35		0.130273	0.0208501	3		0.285738	0.0977206	3			3.35		0.164617	0.0270178	3		0.153847	0.0130683	3			3.35		0.130403	0.0295878	3		0.111532	0.018938	3
3.367		0.204364	0.0229231	3		0.411118	0.0636384	3			3.367		0.140873	0.0182392	3		0.267767	0.10057	3			3.367		0.15136	0.037153	3		0.157796	0.0124936	3			3.367		0.136597	0.030356	3		0.116694	0.0143802	3
3.383		0.204315	0.0295184	3		0.407644	0.0712282	3			3.383		0.141318	0.0151559	3		0.288917	0.09724	3			3.383		0.147486	0.0204567	3		0.15416	0.0170369	3			3.383		0.132371	0.0265874	3		0.13142	0.00674158	3
3.4		0.198499	0.0262032	3		0.433769	0.0570915	3			3.4		0.132152	0.0213255	3		0.253786	0.0857093	3			3.4		0.165086	0.0315371	3		0.145718	0.0291587	3			3.4		0.159808	0.0335812	3		0.121439	0.00812982	3
3.417		0.214375	0.0389896	3		0.405451	0.0480005	3			3.417		0.135946	0.0181387	3		0.284404	0.111581	3			3.417		0.140016	0.0263633	3		0.145163	0.0214514	3			3.417		0.154883	0.0356568	3		0.128182	0.0164062	3
3.433		0.200652	0.0263231	3		0.399371	0.0805588	3			3.433		0.136141	0.0170984	3		0.273142	0.113326	3			3.433		0.142414	0.0258179	3		0.154034	0.0306791	3			3.433		0.155644	0.0221693	3		0.129264	0.0178926	3
3.45		0.200355	0.0312737	3		0.403414	0.0686839	3			3.45		0.141405	0.0155588	3		0.265535	0.0879634	3			3.45		0.142436	0.0278568	3		0.145879	0.0232746	3			3.45		0.147492	0.0297305	3		0.118949	0.00171503	3
3.467		0.197975	0.0255975	3		0.436479	0.055752	3			3.467		0.125138	0.0254354	3		0.255051	0.0888778	3			3.467		0.169988	0.0522283	3		0.153623	0.0122534	3			3.467		0.145386	0.0189948	3		0.119123	0.0147816	3
3.483		0.211591	0.0345892	3		0.408891	0.0623383	3			3.483		0.132883	0.0198465	3		0.264786	0.0974243	3			3.483		0.13136	0.0240197	3		0.140585	0.0273917	3			3.483		0.147973	0.0293574	3		0.130365	0.0126557	3
3.5		0.181449	0.016146	3		0.432612	0.0357351	3			3.5		0.128779	0.0227508	3		0.275863	0.108927	3			3.5		0.15689	0.043984	3		0.145557	0.0333055	3			3.5		0.105747	0.024347	3		0.122856	0.00979906	3
3.517		0.204125	0.0300936	3		0.412758	0.0633848	3			3.517		0.139453	0.0160313	3		0.280996	0.0969737	3			3.517		0.146541	0.0209462	3		0.142503	0.0212312	3			3.517		0.113988	0.0327354	3		0.110336	0.0215456	3
3.533		0.190106	0.0237402	3		0.383357	0.0834203	3			3.533		0.119341	0.0267347	3		0.28095	0.111844	3			3.533		0.141775	0.0262529	3		0.149465	0.0146979	3			3.533		0.128488	0.0318489	3		0.109583	0.0131014	3
3.55		0.193214	0.0315411	3		0.381202	0.0730104	3			3.55		0.125332	0.0209611	3		0.25909	0.0906642	3			3.55		0.155431	0.0160201	3		0.14336	0.0172309	3			3.55		0.126146	0.0382702	3		0.130547	0.0135488	3
3.567		0.196896	0.0336584	3		0.436722	0.0730481	3			3.567		0.133865	0.0146828	3		0.262173	0.0923511	3			3.567		0.145419	0.031018	3		0.15164	0.0176921	3			3.567		0.128997	0.0304599	3		0.11875	0.011509	3
3.583		0.191701	0.0237473	3		0.430505	0.0847697	3			3.583		0.126205	0.0167828	3		0.274495	0.108598	3			3.583		0.139412	0.0220969	3		0.145142	0.00863033	3			3.583		0.128514	0.0227761	3		0.113508	0.0147593	3
3.6		0.186669	0.0260424	3		0.419345	0.0846556	3			3.6		0.137334	0.0131301	3		0.270057	0.110831	3			3.6		0.137951	0.0244693	3		0.14841	0.0152337	3			3.6		0.137509	0.0321229	3		0.118399	0.0223773	3
3.617		0.189998	0.0293145	3		0.393722	0.0734928	3			3.617		0.126603	0.0144275	3		0.260219	0.097664	3			3.617		0.135522	0.0196945	3		0.133124	0.015514	3			3.617		0.138542	0.0214054	3		0.114961	0.0191262	3
3.633		0.192031	0.0292874	3		0.442429	0.0541506	3			3.633		0.122026	0.0140379	3		0.266131	0.0885626	3			3.633		0.147475	0.0145579	3		0.141771	0.0237811	3			3.633		0.127996	0.0202031	3		0.122134	0.0152081	3
3.65		0.195738	0.0318414	3		0.382488	0.0790839	3			3.65		0.12883	0.0134051	3		0.272297	0.097197	3			3.65		0.13864	0.0269644	3		0.131783	0.0214521	3			3.65		0.145845	0.0313351	3		0.125402	0.0144235	3
3.667		0.195581	0.0314551	3		0.375312	0.0659902	3			3.667		0.127854	0.0145705	3		0.26786	0.094487	3			3.667		0.142581	0.0402067	3		0.135375	0.0129637	3			3.667		0.14049	0.0355122	3		0.12841	0.0140303	3
3.683		0.180942	0.0227069	3		0.396589	0.0873016	3			3.683		0.132807	0.0136339	3		0.275267	0.10276	3			3.683		0.129929	0.0141504	3		0.131753	0.0150249	3			3.683		0.133052	0.0291603	3		0.124726	0.013883	3
3.7		0.194122	0.0331425	3		0.365754	0.0951796	3			3.7		0.12558	0.0142536	3		0.263566	0.0921771	3			3.7		0.14337	0.0294634	3		0.134957	0.0101863	3			3.7		0.139051	0.037548	3		0.102659	0.0132712	3
3.717		0.181342	0.0295963	3		0.385785	0.0653891	3			3.717		0.125138	0.0166991	3		0.287095	0.113937	3			3.717		0.131428	0.0339957	3		0.134218	0.0158315	3			3.717		0.147948	0.0327334	3		0.100418	0.0196392	3
3.733		0.188715	0.0295245	3		0.390789	0.0720486	3			3.733		0.133303	0.0168081	3		0.266542	0.0919872	3			3.733		0.136369	0.02592	3		0.148187	0.0171516	3			3.733		0.140023	0.0280296	3		0.102511	0.00715907	3
3.75		0.180208	0.0267215	3		0.412219	0.0641508	3			3.75		0.129198	0.0125622	3		0.254469	0.098365	3			3.75		0.139709	0.0249448	3		0.147388	0.0130764	3			3.75		0.164746	0.0266025	3		0.112543	0.0173106	3
3.767		0.185129	0.0317414	3		0.406016	0.0611384	3			3.767		0.115915	0.0201824	3		0.258476	0.0979315	3			3.767		0.144527	0.0333269	3		0.135384	0.0195658	3			3.767		0.144357	0.0190689	3		0.110919	0.013033	3
3.783		0.164619	0.023403	3		0.441629	0.0537369	3			3.783		0.117266	0.0179058	3		0.259676	0.0963999	3			3.783		0.144822	0.0230478	3		0.139685	0.0169247	3			3.783		0.127292	0.00709883	3		0.1192	0.0134534	3
3.8		0.176968	0.0241134	3		0.42523	0.0549327	3			3.8		0.108654	0.0188382	3		0.279515	0.102517	3			3.8		0.136088	0.027295	3		0.136688	0.0158387	3			3.8		0.142541	0.0188405	3		0.115967	0.00939148	3
3.817		0.172347	0.0238454	3		0.40095	0.0361626	3			3.817		0.116259	0.016891	3		0.254821	0.0996243	3			3.817		0.139586	0.0264481	3		0.141171	0.00751742	3			3.817		0.116996	0.0230122	3		0.112398	0.0113564	3
3.833		0.176528	0.0261015	3		0.420406	0.0579141	3			3.833		0.118513	0.0155748	3		0.272414	0.102828	3			3.833		0.144388	0.0413632	3		0.134701	0.0159142	3			3.833		0.125101	0.0243793	3		0.118609	0.0224753	3
3.85		0.172986	0.0265464	3		0.386188	0.0873236	3			3.85		0.122675	0.0139033	3		0.255774	0.102919	3			3.85		0.152291	0.0424319	3		0.140426	0.0183605	3			3.85		0.122882	0.033734	3		0.121779	0.0117942	3
3.867		0.178832	0.029162	3		0.395034	0.0545101	3			3.867		0.118627	0.018181	3		0.264497	0.0963458	3			3.867		0.132607	0.0304371	3		0.110925	0.0234333	3			3.867		0.119712	0.029114	3		0.118136	0.0152151	3
3.883		0.1822	0.02961	3		0.401343	0.0436536	3			3.883		0.113455	0.0164493	3		0.241128	0.0838038	3			3.883		0.135884	0.0411338	3		0.141363	0.006446	3			3.883		0.108043	0.0258915	3		0.118935	0.0183654	3
3.9		0.171259	0.0266653	3		0.43509	0.0447701	3			3.9		0.114166	0.0149272	3		0.262475	0.0925108	3			3.9		0.159128	0.0453435	3		0.145763	0.00545059	3			3.9		0.122109	0.0280593	3		0.132175	0.0134185	3
3.917		0.173918	0.0272515	3		0.406136	0.0621482	3			3.917		0.121716	0.0140282	3		0.266092	0.102739	3			3.917		0.147943	0.0384686	3		0.133858	0.0168671	3			3.917		0.127478	0.030116	3		0.117486	0.0133064	3
3.933		0.189702	0.0351588	3		0.4185	0.0556273	3			3.933		0.110037	0.0165259	3		0.237534	0.0953456	3			3.933		0.126915	0.0382403	3		0.141639	0.0208858	3			3.933		0.138977	0.0291976	3		0.127347	0.0124702	3
3.95		0.178531	0.0331162	3		0.393477	0.0560676	3			3.95		0.11054	0.0133701	3		0.275495	0.106943	3			3.95		0.152594	0.0325508	3		0.134544	0.0223704	3			3.95		0.151362	0.0311444	3		0.108672	0.0105001	3
3.967		0.168153	0.020441	3		0.366539	0.0812554	3			3.967		0.12043	0.0132473	3		0.276178	0.10637	3			3.967		0.137059	0.034133	3		0.13024	0.0229192	3			3.967		0.128998	0.0173162	3		0.107413	0.0138508	3
3.983		0.176249	0.02829	3		0.385424	0.0459061	3			3.983		0.12024	0.0118767	3		0.247858	0.100537	3			3.983		0.148016	0.0318306	3		0.137754	0.00390174	3			3.983		0.132854	0.0191879	3		0.127398	0.0114165	3
4		0.175562	0.0258134	3		0.477375	0.0575752	3			4		0.117498	0.0140611	3		0.248941	0.0881758	3			4		0.127367	0.0350604	3		0.135389	0.0252802	3			4		0.139383	0.0266797	3		0.107159	0.023166	3
4.017		0.16914	0.0281277	3		0.403532	0.0651291	3			4.017		0.105799	0.0191544	3		0.239017	0.0916879	3			4.017		0.131329	0.0189286	3		0.130656	0.0238541	3			4.017		0.103494	0.0158656	3		0.120676	0.021313	3
4.033		0.173175	0.0276235	3		0.406104	0.0624432	3			4.033		0.109884	0.0136433	3		0.239308	0.0759504	3			4.033		0.134303	0.0406223	3		0.128059	0.022272	3			4.033		0.14018	0.0260957	3		0.120561	0.017704	3
4.05		0.180144	0.036367	3		0.390109	0.077868	3			4.05		0.120542	0.0148385	3		0.244821	0.0840701	3			4.05		0.142524	0.0336396	3		0.137227	0.0166918	3			4.05		0.137621	0.0412136	3		0.115001	0.0159318	3
4.067		0.168976	0.0290902	3		0.431646	0.0479103	3			4.067		0.118416	0.010798	3		0.261346	0.0862906	3			4.067		0.150839	0.0504235	3		0.135146	0.0166703	3			4.067		0.152977	0.0500252	3		0.117456	0.0323052	3
4.083		0.166166	0.0274705	3		0.388908	0.0669016	3			4.083		0.115044	0.012167	3		0.251302	0.0797983	3			4.083		0.125735	0.0185263	3		0.13267	0.0196787	3			4.083		0.125104	0.028766	3		0.120562	0.0155526	3
4.1		0.167135	0.0271317	3		0.398563	0.0537396	3			4.1		0.104496	0.0153102	3		0.240846	0.096571	3			4.1		0.142123	0.0343705	3		0.128574	0.0242505	3			4.1		0.121705	0.0164823	3		0.0973543	0.0196093	3
4.117		0.16795	0.0290513	3		0.430134	0.0665791	3			4.117		0.103625	0.0192669	3		0.261622	0.0963942	3			4.117		0.17208	0.0335515	3		0.13819	0.0239824	3			4.117		0.109112	0.0351619	3		0.127998	0.0227239	3
4.133		0.169057	0.025757	3		0.399445	0.0553042	3			4.133		0.0978997	0.0191239	3		0.236261	0.0865791	3			4.133		0.118731	0.0165237	3		0.129389	0.0151366	3			4.133		0.117832	0.0263033	3		0.105541	0.0146127	3
4.15		0.160096	0.0224999	3		0.424527	0.0639456	3			4.15		0.0994867	0.0174014	3		0.258865	0.110615	3			4.15		0.132683	0.0329525	3		0.140055	0.0168471	3			4.15		0.11701	0.0333565	3		0.104996	0.0221846	3
4.167		0.179098	0.0322983	3		0.431635	0.0505345	3			4.167		0.115788	0.0124736	3		0.255117	0.094874	3			4.167		0.128239	0.031211	3		0.142808	0.0323448	3			4.167		0.118448	0.0332959	3		0.113011	0.0174998	3
4.183		0.168041	0.0310587	3		0.42756	0.0571027	3			4.183		0.114336	0.0107048	3		0.253746	0.0852503	3			4.183		0.179819	0.0523533	3		0.136996	0.0207733	3			4.183		0.106801	0.0298547	3		0.103578	0.0167348	3
4.2		0.178673	0.0353811	3		0.397101	0.0661388	3			4.2		0.11753	0.0115814	3		0.242436	0.0961276	3			4.2		0.106913	0.0279621	3		0.125705	0.0198501	3			4.2		0.113401	0.0370243	3		0.109919	0.0160978	3
4.217		0.172772	0.030314	3		0.452587	0.0374039	3			4.217		0.12004	0.0113456	3		0.260519	0.092851	3			4.217		0.129172	0.022341	3		0.134385	0.0084614	3			4.217		0.112133	0.0358154	3		0.112882	0.0221536	3
4.233		0.172999	0.0336493	3		0.402261	0.0511325	3			4.233		0.105932	0.00942927	3		0.272783	0.106117	3			4.233		0.121906	0.0190394	3		0.140496	0.0222192	3			4.233		0.125564	0.0372561	3		0.10266	0.0238897	3
4.25		0.172657	0.0359272	3		0.404641	0.0812534	3			4.25		0.107411	0.014216	3		0.279309	0.0888725	3			4.25		0.149633	0.0428574	3		0.125397	0.0216847	3			4.25		0.128664	0.0447524	3		0.111324	0.0142624	3
4.267		0.156719	0.0204426	3		0.392885	0.0504464	3			4.267		0.094218	0.0200776	3		0.282225	0.107494	3			4.267		0.131989	0.0158487	3		0.124622	0.0233729	3			4.267		0.119114	0.0219375	3		0.120598	0.0281459	3
4.283		0.16944	0.0327136	3		0.383897	0.0510982	3			4.283		0.103462	0.0132343	3		0.245109	0.0870149	3			4.283		0.120238	0.023129	3		0.144389	0.00407403	3			4.283		0.109029	0.0265628	3		0.111528	0.0280522	3
4.3		0.161366	0.0291549	3		0.395144	0.0599279	3			4.3		0.0998431	0.014111	3		0.262193	0.10352	3			4.3		0.124081	0.0216853	3		0.136687	0.0174799	3			4.3		0.133575	0.0337927	3		0.12064	0.0139631	3
4.317		0.172644	0.0316381	3		0.378812	0.0775197	3			4.317		0.11316	0.0133275	3		0.242258	0.0946569	3			4.317		0.129154	0.0337835	3		0.139689	0.0131271	3			4.317		0.115526	0.0350944	3		0.124218	0.0196183	3
4.333		0.164781	0.0262015	3		0.422982	0.0513902	3			4.333		0.105611	0.0125221	3		0.258286	0.108534	3			4.333		0.128909	0.0192698	3		0.129146	0.00438787	3			4.333		0.110285	0.0243604	3		0.126588	0.0272361	3
4.35		0.148179	0.0239362	3		0.406677	0.0580464	3			4.35		0.114393	0.0129739	3		0.259608	0.100133	3			4.35		0.129574	0.0341668	3		0.136332	0.013566	3			4.35		0.110237	0.0247647	3		0.12721	0.0211156	3
4.367		0.168395	0.0315498	3		0.399197	0.0451869	3			4.367		0.113282	0.0100688	3		0.283814	0.113375	3			4.367		0.133579	0.0185243	3		0.138486	0.0154113	3			4.367		0.10511	0.0404285	3		0.114319	0.0222166	3
4.383		0.158495	0.0305547	3		0.413693	0.0540271	3			4.383		0.108195	0.0118618	3		0.246916	0.100846	3			4.383		0.129996	0.0373812	3		0.126668	0.0230017	3			4.383		0.104932	0.0281848	3		0.107351	0.0156178	3
4.4		0.156426	0.0255225	3		0.367708	0.0584403	3			4.4		0.106139	0.0106038	3		0.279749	0.117174	3			4.4		0.145158	0.0249985	3		0.130042	0.0266684	3			4.4		0.106932	0.0381366	3		0.101221	0.0223301	3
4.417		0.172729	0.03164	3		0.414878	0.0443538	3			4.417		0.107177	0.011462	3		0.250587	0.0821288	3			4.417		0.146638	0.029066	3		0.125809	0.0201515	3			4.417		0.111213	0.0346262	3		0.118514	0.0062539	3
4.433		0.162006	0.0284603	3		0.397684	0.0473772	3			4.433		0.0962404	0.0117069	3		0.252378	0.0785168	3			4.433		0.1451	0.0353608	3		0.137193	0.0123658	3			4.433		0.122041	0.0306405	3		0.122271	0.0142037	3
4.45		0.166532	0.0312808	3		0.399052	0.0743634	3			4.45		0.10369	0.0148945	3		0.25682	0.103862	3			4.45		0.133031	0.0287111	3		0.135097	0.0188192	3			4.45		0.12117	0.0396458	3		0.114338	0.0153365	3
4.467		0.150174	0.0214952	3		0.425049	0.0483763	3			4.467		0.0971595	0.00921192	3		0.24463	0.0965226	3			4.467		0.147148	0.04348	3		0.130136	0.0239159	3			4.467		0.147594	0.0422657	3		0.116253	0.0109851	3
4.483		0.156818	0.028351	3		0.387262	0.0608763	3			4.483		0.111522	0.00934727	3		0.251332	0.0788208	3			4.483		0.127398	0.0312603	3		0.136218	0.0139516	3			4.483		0.118325	0.0317245	3		0.111252	0.0182318	3
4.5		0.171356	0.0349839	3		0.40699	0.0624764	3			4.5		0.0974727	0.0136358	3		0.243293	0.0790306	3			4.5		0.151142	0.0484623	3		0.126651	0.0107981	3			4.5		0.102774	0.0360994	3		0.109153	0.0196069	3
4.517		0.16281	0.0309239	3		0.399148	0.0758143	3			4.517		0.0959895	0.0153997	3		0.257406	0.0976871	3			4.517		0.157528	0.0250347	3		0.129623	0.0129923	3			4.517		0.0921684	0.0278398	3		0.102025	0.0200461	3
4.533		0.163274	0.0334555	3		0.42255	0.0709608	3			4.533		0.103836	0.00745798	3		0.228633	0.0845461	3			4.533		0.14599	0.0168965	3		0.135334	0.0176241	3			4.533		0.098331	0.0340461	3		0.115257	0.0179629	3
4.55		0.155371	0.0285405	3		0.421169	0.0646412	3			4.55		0.0969498	0.0097565	3		0.2197	0.072369	3			4.55		0.103477	0.00930362	3		0.11894	0.0156444	3			4.55		0.0981262	0.0255667	3		0.0915216	0.0177978	3
4.567		0.174923	0.0384477	3		0.418951	0.0567955	3			4.567		0.0900031	0.014299	3		0.241784	0.0915173	3			4.567		0.129591	0.0352666	3		0.124866	0.0173917	3			4.567		0.12958	0.0473597	3		0.113238	0.0234168	3
4.583		0.148037	0.0262172	3		0.407851	0.0494072	3			4.583		0.101267	0.00977894	3		0.225658	0.0964685	3			4.583		0.143726	0.0295488	3		0.127161	0.0173345	3			4.583		0.136689	0.0549776	3		0.108239	0.0186911	3
4.6		0.15691	0.0285013	3		0.385857	0.0644	3			4.6		0.100927	0.00956421	3		0.234441	0.0862914	3			4.6		0.137007	0.0234667	3		0.124678	0.0301446	3			4.6		0.111059	0.0234237	3		0.0970557	0.00654031	3
4.617		0.154646	0.0295112	3		0.400559	0.0836174	3			4.617		0.0944349	0.0113775	3		0.258553	0.0908955	3			4.617		0.130653	0.0320304	3		0.141353	0.0221289	3			4.617		0.144625	0.0242431	3		0.102382	0.013811	3
4.633		0.153214	0.0267414	3		0.411678	0.0863248	3			4.633		0.0942878	0.00782568	3		0.2202	0.0908098	3			4.633		0.111166	0.0145516	3		0.140609	0.0215961	3			4.633		0.0957791	0.0304774	3		0.125541	0.00932866	3
4.65		0.152443	0.0312085	3		0.384131	0.0715796	3			4.65		0.0928668	0.00966455	3		0.256166	0.0909783	3			4.65		0.139066	0.0218607	3		0.116724	0.0185213	3			4.65		0.110325	0.0156769	3		0.0966503	0.0204993	3
4.667		0.158084	0.0343304	3		0.36146	0.0893782	3			4.667		0.0924407	0.00780564	3		0.251348	0.0919044	3			4.667		0.131242	0.028615	3		0.135283	0.0199674	3			4.667		0.128934	0.0413689	3		0.0957642	0.0142539	3
4.683		0.149658	0.024366	3		0.461379	0.0590827	3			4.683		0.0948162	0.0114191	3		0.254455	0.0862674	3			4.683		0.153528	0.0387613	3		0.123541	0.0186623	3			4.683		0.112499	0.0383688	3		0.10867	0.0281309	3
4.7		0.160427	0.0300597	3		0.40005	0.0543798	3			4.7		0.0936283	0.00632466	3		0.25252	0.0958322	3			4.7		0.129965	0.0382987	3		0.139517	0.0269704	3			4.7		0.119984	0.0325789	3		0.114334	0.0178983	3
4.717		0.144763	0.0282542	3		0.394013	0.0704249	3			4.717		0.087682	0.00847611	3		0.259894	0.0935493	3			4.717		0.126657	0.0280686	3		0.12456	0.013546	3			4.717		0.0988676	0.0216759	3		0.100769	0.0191829	3
4.733		0.149962	0.0270453	3		0.389824	0.0814194	3			4.733		0.0970827	0.00586172	3		0.213727	0.086386	3			4.733		0.128468	0.025851	3		0.125951	0.0205639	3			4.733		0.101653	0.0241078	3		0.114934	0.0143537	3
4.75		0.152697	0.0270211	3		0.365271	0.0786338	3			4.75		0.0873571	0.0056296	3		0.235013	0.0937167	3			4.75		0.14601	0.026289	3		0.130996	0.0263593	3			4.75		0.135603	0.043858	3		0.111133	0.0215131	3
4.767		0.158734	0.0362358	3		0.40416	0.032244	3			4.767		0.0925936	0.00533582	3		0.242788	0.100267	3			4.767		0.149332	0.0390005	3		0.135392	0.0235853	3			4.767		0.115088	0.0394289	3		0.111169	0.0128368	3
4.783		0.160098	0.0333391	3		0.356997	0.0546417	3			4.783		0.0906202	0.00378114	3		0.259731	0.105373	3			4.783		0.121726	0.0315328	3		0.121577	0.0139673	3			4.783		0.101417	0.024089	3		0.114113	0.0109604	3
4.8		0.155595	0.0328469	3		0.363511	0.0769222	3			4.8		0.0895319	0.00612701	3		0.219985	0.0911752	3			4.8		0.125097	0.0292871	3		0.134921	0.0184231	3			4.8		0.105273	0.0289893	3		0.0950779	0.0196244	3
4.817		0.170707	0.0404253	3		0.38277	0.0616594	3			4.817		0.0839778	0.00895444	3		0.23772	0.0939729	3			4.817		0.152186	0.0507828	3		0.135015	0.0152136	3			4.817		0.104346	0.0298646	3		0.0975894	0.0193466	3
4.833		0.152672	0.0289775	3		0.430317	0.0466819	3			4.833		0.0830465	0.0118235	3		0.253326	0.0918895	3			4.833		0.146482	0.0317916	3		0.127739	0.0144013	3			4.833		0.0973658	0.0253729	3		0.100073	0.0180127	3
4.85		0.152037	0.0340043	3		0.421586	0.0487496	3			4.85		0.0869013	0.00817537	3		0.227051	0.0865225	3			4.85		0.127817	0.024866	3		0.11744	0.0155882	3			4.85		0.138724	0.0488394	3		0.102588	0.0200789	3
4.867		0.154777	0.0312234	3		0.396366	0.0543641	3			4.867		0.0839878	0.0107084	3		0.260909	0.0949513	3			4.867		0.127529	0.0390955	3		0.136636	0.0147732	3			4.867		0.10051	0.0302764	3		0.108899	0.00880353	3
4.883		0.147552	0.0310863	3		0.433316	0.0457309	3			4.883		0.0842107	0.0124945	3		0.236397	0.0947789	3			4.883		0.129229	0.0501717	3		0.125167	0.0230323	3			4.883		0.113241	0.0186281	3		0.0988201	0.0123893	3
4.9		0.145242	0.0262784	3		0.403817	0.0503663	3			4.9		0.0921465	0.00698103	3		0.268167	0.12002	3			4.9		0.142685	0.021564	3		0.125677	0.0127091	3			4.9		0.106051	0.0290467	3		0.0975191	0.0253529	3
4.917		0.136567	0.0240266	3		0.440338	0.0524282	3			4.917		0.0919027	0.00802145	3		0.236565	0.0921881	3			4.917		0.110284	0.0152922	3		0.140138	0.00899909	3			4.917		0.112166	0.0261441	3		0.110671	0.0228398	3
4.933		0.16057	0.0322194	3		0.406711	0.0738462	3			4.933		0.0786795	0.0106754	3		0.2608	0.0984266	3			4.933		0.138315	0.0291307	3		0.134343	0.0100936	3			4.933		0.104438	0.0323549	3		0.0987593	0.0179505	3
4.95		0.147587	0.0276948	3		0.399795	0.0634794	3			4.95		0.0838296	0.00852702	3		0.2337	0.087814	3			4.95		0.11661	0.0257516	3		0.12755	0.0188986	3			4.95		0.102144	0.0283739	3		0.103735	0.0222759	3
4.967		0.139343	0.0255872	3		0.36365	0.065218	3			4.967		0.089087	0.00848225	3		0.240769	0.0845474	3			4.967		0.12473	0.0332891	3		0.121685	0.0220582	3			4.967		0.111779	0.0359882	3		0.111876	0.017072	3
4.983		0.145509	0.0280089	3		0.383905	0.0545767	3			4.983		0.0587692	0.0300608	3		0.234218	0.095049	3			4.983		0.117559	0.03635	3		0.116449	0.0230809	3			4.983		0.0647206	0.0296475	3		0.107327	0.0125297	3
5		0.139949	0.0287341	3		0.428086	0.0585459	3			5		0.0591452	0.0302006	3		0.244181	0.0937556	3			5		0.134176	0.0424358	3		0.118395	0.0169023	3			5		0.08942	0.0221423	3		0.0785314	0.039477	3
