# Supplementary material for: Distinct architectural requirements for the parS centromeric sequence of the pSM19035 plasmid partition machinery
Source: eLife journal article supplement (doi:10.7554/elife.79480), 2022-09-05

A

ParA<sub>pSM</sub> - GFP bound to saturatin first,

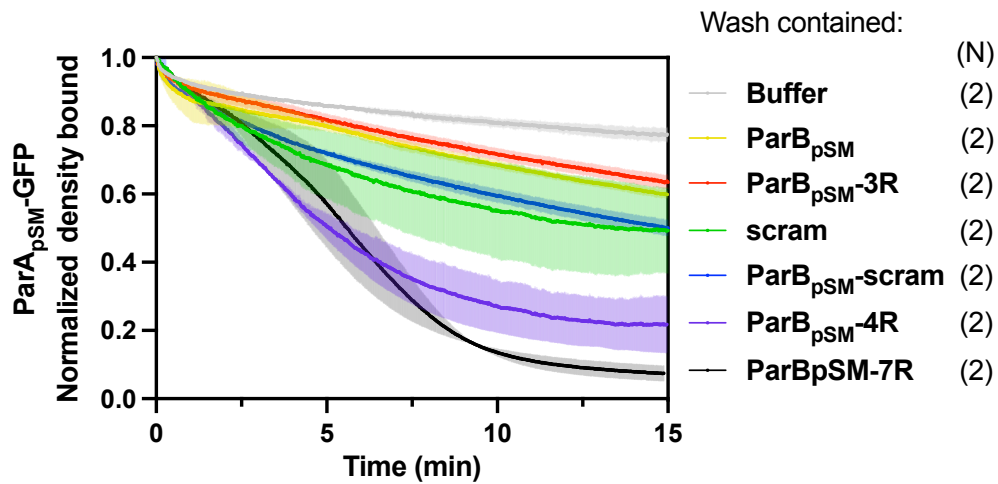

B

ParA<sub>pSM</sub><sup>D60E</sup> - GFP bound to saturatin first,

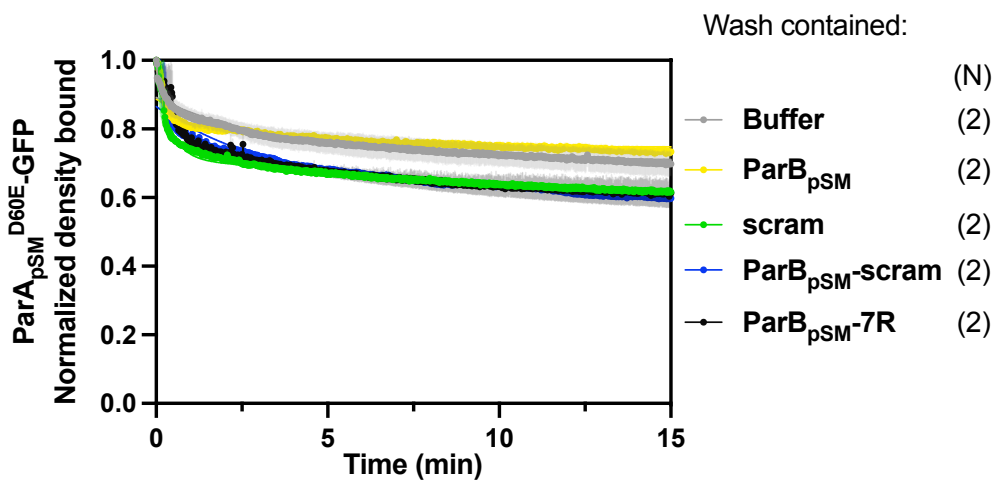

Supplement: supp [file elife-79480-supp-v1.zip]
