# Supplementary material for: Distinct architectural requirements for the parS centromeric sequence of the pSM19035 plasmid partition machinery
Source: eLife journal article supplement (doi:10.7554/elife.79480), 2022-09-05

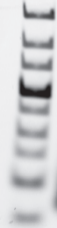

1R

2R

3R(1)

4R(1)

5R

6R

7R

scram

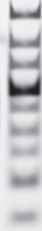

3R-1nc

3R-1nc-3R

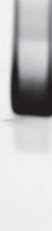

3R-2nc-3R

3R(2)

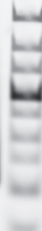

4R(2)

4R(3)

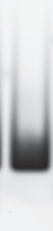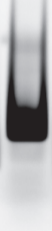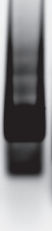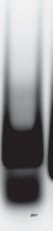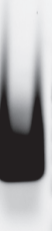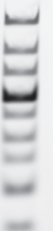

Supplement: supp [file elife-79480-supp-v1.zip]
