# Supplementary material for: Distinct architectural requirements for the parS centromeric sequence of the pSM19035 plasmid partition machinery
Source: eLife journal article supplement (doi:10.7554/elife.79480), 2022-09-05

A

4R  $parS_{pSM}$  ( $\rightarrow\rightarrow\leftarrow\leftarrow$ )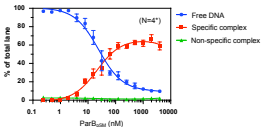

B

3R  $parS_{pSM}$  ( $\rightarrow\rightarrow\leftarrow$ )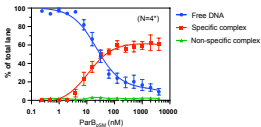

C

nsDNA (55bp)

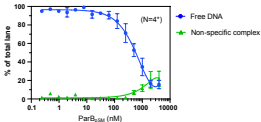

Supplement: supp [file elife-79480-supp-v1.zip]
