# Supplementary material for: Distinct architectural requirements for the parS centromeric sequence of the pSM19035 plasmid partition machinery
Source: eLife journal article supplement (doi:10.7554/elife.79480), 2022-09-05
Supplement: supp [file elife_poa_e79480_Figure_1_source_data_1.xlsx]

## Sheet: Fig 1A-D
Figure 1A baseline corrected data
		7R				6R				5R				4R				3R				2R				1R				scram				no DNA
ParBpSM (μM)		Mean	SEM	n		Mean	SEM	n		Mean	SEM	n		Mean	SEM	n		Mean	SEM	n		Mean	SEM	n		Mean	SEM	n		Mean	SEM	n		Mean	SEM	n
0		1.06758	0.177204	7		1.09206	0.207506	6		1.30713	0.459333	5		0.807299	0.198963	7		1.05844	0.292536	7		0.989227	0.610397	4		0.436227	0.187885	4		0.598227	0.196818	6		0.712061	0.0871597	3
0.063		2.50761	0.620579	4		2.53086	0.655859	4		1.78286	0.791758	3		0.906262	0.419591	5		0.889862	0.210652	4		0.305196	0.231107	3		0.420529	0.146129	3		0.696196	0.310388	3
0.125		4.04507	0.799408	4		3.98532	0.959748	4		2.70874	1.09261	3		1.82667	0.7589	5		1.00957	0.17928	4		0.575408	0.16903	3		0.702074	0.433894	3		0.597074	0.166693	3
0.187		5.55029	1.37928	7																										0.861786	0.290805	6
0.25		6.41028	0.588517	7		6.46625	0.475728	6		5.04662	0.482409	5		3.67822	1.18557	5		1.41199	0.452538	7		1.72692	0.791167	4		1.35667	0.80371	4		0.748088	0.231731	3		0.431421	0.264461	3
0.375		7.62444	0.990905	7																										0.944435	0.303187	6
0.5		9.72869	0.285362	7		9.43628	0.821586	6		7.83412	0.686496	5		5.61426	0.919319	7		2.22354	0.3342	7		3.16712	1.32164	4		1.50987	0.642862	4		1.02178	0.385536	3		0.579449	0.0930356	3
0.75		12.5301	1.24824	7																										1.26581	0.0750421	6
1		15.3839	0.892506	7		15.8877	1.19108	6		14.9107	0.888802	5		8.46407	1.27572	7		2.84379	0.299107	7		2.7745	0.749271	4		1.82025	0.663789	4		1.15884	0.596208	3		0.49717	0.203127	3
1.5		17.3752	0.861792	7																										1.47272	0.45617	6
2		20.3889	0.7073	7		19.8876	0.818756	6		19.1231	1.07572	5		14.1629	1.02853	7		3.19528	0.599524	7		3.88653	1.45717	4		2.34253	1.07168	4		1.19895	0.250967	3		0.458946	0.309082	3
3		21.3781	1.40921	7																										1.34022	0.53496	6
4		21.6625	0.891972	7		21.633	1.11859	6		22.5772	0.854173	5		17.015	1.12307	7		3.63283	0.550912	7		3.63983	1.11674	4		3.35758	1.04336	4		1.83716	0.65301	3		0.757165	0.443558	3
6		21.892	1.05245	7																										2.20055	0.466862	6
8		20.3592	1.32601	4		21.5376	0.83894	6		21.0955	0.840591	5		19.9046	1.07828	6		4.07327	0.819751	6		4.09244	1.47881	4		3.25344	1.28969	4		2.3996	1.06644	3		-0.0200647	0.171182	3
Fig 1B baseline corrected data
		4R-parS(→→←←)				4R-parS(→→←→)				4R-parS(→→→→)
ParBpSM (μM)		Mean	SEM	n		Mean	SEM	n		Mean	SEM	n
0		0.817299	0.201274	7		0.793727	0.370133	3		0.835394	0.183468	3
0.063		0.906262	0.419591	5
0.125		1.82667	0.7589	5
0.25		3.67822	1.18557	5		2.23909	0.599937	3		3.15475	0.400906	3
0.5		5.61426	0.919319	7		5.51312	0.661937	3		6.04045	0.814178	3
1		8.46407	1.27572	7		9.38117	0.71623	3		7.86117	1.429	3
2		14.1629	1.02853	7		12.4866	1.40321	3		10.5386	0.965177	3
4		17.015	1.12307	7		16.2962	0.775321	3		14.0778	0.599388	3
8		19.9213	1.0811	6		18.8979	1.08197	3		14.0169	2.47524	3
Fig 1C baseline corrected data
		3R-parS(→→←)				3R-parS(→→→)				3R-1ncparS(→→←-)				3R-1nc-3RparS(→→→-←←←)				3R-2nc-3RparS(→→→--←←←)
ParBpSM (μM)		Mean	SEM	n		Mean	SEM	n		Mean	SEM	n		Mean	SEM	n		Mean	SEM	n
0		1.0483	0.292145	7		0.486727	0.130287	3		1.09458	0.24218	7		0.682852	0.122776	8		1.62339	0.265766	6
0.063		0.817862	0.142512	4
0.125		1.00957	0.17928	4						2.03632	0.140966	4		1.69274	0.16265	3		1.54187	0.309312	5
0.25		1.46828	0.472431	7		1.20875	0.316548	3		1.85592	0.30284	4		1.72799	0.248635	7		2.31982	0.471443	5
0.5		2.22369	0.334277	7		1.83478	0.509026	3		2.74983	0.261738	7		2.24962	0.305512	8		3.05645	0.508185	6
1		2.84693	0.300615	7		1.88817	0.271835	3		3.01936	0.235246	7		2.76925	0.299912	8		3.0435	0.345212	6
2		3.18614	0.59514	7		2.57728	0.307161	3		3.84228	0.434918	7		4.6859	0.382669	8		3.80478	0.464755	6
4		3.63283	0.550912	7		3.92716	0.684209	3		4.55733	0.550334	6		5.85083	0.409521	8		4.44516	0.527783	6
8		4.0816	0.828842	6		2.9576	0.290014	3		4.27665	0.487761	7		6.88731	0.857307	8		4.88444	0.634322	6
	Figure 1D data
	7R-parS (nM)		Mean	SEM	n
	0		3.309	0.480359	7
	1.2		4.415	0.454889	4
	2.3		5.74733	0.388893	6
	4.7		6.90943	0.535641	7
	9.4		8.59714	0.57912	7
	18.8		12.8279	1.32733	7
	37.5		20.6173	1.44246	7
	75		22.1194	0.778866	7
	150		22.7937	0.801604	3

## Sheet: Fig 1-fig supplement 1
Source Data 1: Figure 1-figure supplement 1A (background subtracted data)
		0.25 mM ParA				0.5 mM ParA				1 mM ParA				2 mM ParA
[ParB] (mM)		Mean	SEM	n		Mean	SEM	n		Mean	SEM	n		Mean	SEM	n
0		1.47006	0.569279	3		0.486727	0.118743	4		1.69698	0.552348	4		2.45139	1.82259	3
0.063
0.125
0.25		5.03509	0.653235	3		4.77042	0.949099	3		2.99842	1.46381	3		8.79842	1.62897	3
0.5		5.71345	0.92019	3		8.35487	1.30014	4		13.8261	4.0852	4		17.3891	5.43596	3
1		7.37484	0.716977	3		10.1305	0.454344	4		17.7835	4.35063	4		34.5315	7.06274	3
2		9.28128	1.12742	3		11.007	1.82371	4		22.851	6.26109	4		50.4623	5.02228	3
4		7.37683	1.25243	3		16.5986	2.34173	4		25.8988	7.99366	4		50.0305	11.2051	3
8		9.20227	0.884998	3		13.1719	1.37941	4		25.6534	6.82618	4		58.5609	7.96971	3
Figure 1-figure supplement 1B
		ParBpSM1-27				ParBpSM1-27K10A				ParBpSM1-27-NOpBR322(60uMbp)				ParBP1-30
Peptide(µM)		Mean	SEM	n		Mean	SEM	n		Mean	SEM	n		Mean	SEM	n
0		0.622	0.12038	5		0.783667	0.0360117	6		0.719	0.18438	3		0.751	0.161163	5
0.125		0.903333	0.147779	3		0.795333	0.100335	3		0.815	0.0511175	3		0.9204	0.0199138	5
0.25		1.03133	0.0845406	3		0.797667	0.0578974	3		0.795333	0.002848	3		0.8788	0.048978	5
0.5		1.23467	0.0491031	3		0.779333	0.116247	3		0.717333	0.0217358	3		0.91625	0.0284323	4
1		1.383	0.044238	3		0.797667	0.0396709	3		0.704667	0.0160451	3		0.636333	0.0840364	3
2		1.859	0.15094	3		0.924	0.018735	3		0.886	0.0654548	3		0.6524	0.172628	5
4		1.86633	0.0879703	3		0.957333	0.0625309	3		0.627333	0.00895048	3		0.37	0.133028	3
8		1.8188	0.247719	5		0.9484	0.0522538	5		0.798	0.0419047	3		0.641	0.140287	5
16		1.9246	0.185226	5		0.844333	0.0620568	6		0.667333	0.0225191	3		0.561333	0.057762	3
32		2.0415	0.115054	4		1.27967	0.164825	6		0.736333	0.0349205	3		0.729	0.160274	5
64		2.24575	0.12185	4		1.4015	0.0417969	6		0.691	0.0295014	3		0.525667	0.0826263	3
128		3.097	0.0992195	4		2.039	0.0984811	6		0.718	0.0280416	3		0.6898	0.0776398	5
256		3.2405	0.126487	4		3.169	0.0279678	6		0.659667	0.0307481	3		0.485667	0.186298	3
Figure 1-figure supplement 1C
		no DNA				7R 150 nM				7R 750 nM
		Mean	SEM	n		Mean	SEM	n		Mean	SEM	n
[ParB]
0		0.940333	0.0833753	3		0.816	0.12282	6		1.018	0.399331	3
0.25		0.679	0.263345	3		3.0035	0.267131	6		2.89367	0.6398	3
0.5		0.846333	0.0900765	3		5.83067	0.316871	6		5.49433	1.52444	3
1		0.802667	0.201961	3		10.8398	1.57155	6		11.5917	0.462478	3
2		0.841667	0.308377	3		9.59167	1.23459	6		15.1393	0.97419	3
4		1.29433	0.442689	3		7.81133	0.59084	6		19.2263	1.24792	3
8		0.826	0.161958	3		6.4025	0.349798	6		15.3203	0.641416	3
16		0.366667	0.140789	3		5.35033	0.343135	6		13.2903	1.47363	3

## Sheet: Fig 1-fig supplement 3
Source Data 1: Figure 1-figur+A1:L73e supplement 3A
	4R parSpSM
	free DNA				specific complex				non-specific complex
[ParBpSM] (nM)
	Mean	SEM	n		Mean	SEM	n		Mean	SEM	n
0	97.6017	1.36503	4		0.213666	0.114175	4		1.16233	0.347132	4
0.24	96.7965	1.8345	3		0.229079	0.0627886	3		3.11487	1.17962	3
0.485	95.931	1.10007	4		0.223443	0.0297323	4		1.99637	0.668065	4
0.975	97.6392	1.5345	4		0.21178	0.0830425	4		2.76197	0.819164	4
1.95	97.5576	1.18858	4		2.09878	1.75698	4		2.44823	0.822868	4
3.905	89.6171	4.14093	4		6.63233	2.13589	4		3.02519	0.872218	4
7.81	83.4658	5.56041	4		20.7258	2.42457	4		2.17372	0.741571	4
15.625	68.3108	7.64203	4		29.0532	4.9519	4		2.21867	0.653742	4
31.25	42.8489	10.8663	4		34.9632	7.63902	4		1.32519	0.458777	4
62.5	29.6528	2.24912	4		50.3971	5.64465	4		0.747732	0.35801	4
125	26.5456	4.35583	4		59.1912	3.40092	4		1.7621	0.697845	4
250	19.5893	2.16751	4		58.4851	2.14854	4		0.874226	0.473257	4
500	15.5457	3.08408	4		62.7563	2.3514	4		1.41574	0.452291	4
1000	12.1299	1.42273	4		61.9236	3.37004	4		1.80964	0.603411	4
2000	10.2109	1.90674	4		67.0176	4.23495	4		2.19115	1.0647	4
4000	9.68948	1.39963	4		59.0169	4.37941	4		1.97138	0.560937	4
Figure 1-figure supplement 3B
	3R parSpSM
	free DNA				specific complex				non-specific complex
[ParBpSM] (nM)
	Mean	SEM	n		Mean	SEM	n		Mean	SEM	n
0	98.237	1.11445	4		0.154248	0.0534342	4		0.934711	0.48817	4
0.24	96.7581	1.15809	3		0.221378	0.0343785	3		1.5242	0.756567	3
0.485	93.8327	1.90906	3		0.181901	0.0240796	3		2.31504	0.268035	3
0.975	97.8937	2.10631	3		0.0670815	0.0234257	3		1.97934	0.783661	3
1.95	94.1678	0.525426	3		0.176702	0.0836502	3		1.82137	1.22015	3
3.905	95.9808	0.492577	3		7.82221	4.09789	3		1.10076	0.872996	3
7.81	81.8709	5.53048	3		23.2939	7.19101	3		1.37193	0.540152	3
15.625	66.3668	7.29018	4		36.3221	5.91491	4		3.3281	1.30685	4
31.25	47.667	6.6437	4		50.068	4.59372	4		3.02428	0.913301	4
62.5	28.4192	4.43447	4		52.569	3.09528	4		2.11773	0.890239	4
125	24.0706	5.49824	4		60.0557	4.60649	4		2.47326	0.876328	4
250	19.428	5.81784	4		55.9822	3.87916	4		1.78238	0.885694	4
500	20.1793	7.14262	4		58.2864	5.80329	4		1.91815	0.587194	4
1000	16.6021	6.05489	4		59.4846	4.2802	4		2.37836	0.837415	4
2000	13.8462	4.02884	4		62.3673	8.47765	4		2.35071	0.263665	4
4000	9.25794	3.5439	4		60.7887	6.65367	4		2.12201	0.727606	4
Figure 1-figure supplement 3C
	nsDNA
	free DNA				specific complex				non-specific complex
[ParBpSM] (nM)
	Mean	SEM	n		Mean	SEM	n		Mean	SEM	n
0	98.5811	0.91689	4						2.00251	1.03987	4
0.24	94.9872	0.37527	2						1.7331	0.381353	2
0.485	97.1635	0.627275	2						5.93768	0.0583303	2
0.975	94.9742	1.28045	2						2.61385	1.21773	2
1.95	93.6554	5.06955	2						1.75171	0.420104	2
3.905	96.3582	0.52377	2						4.75068	1.12667	2
7.81	99.023	0.97699	2						0.497436	0.485436	2
15.625	91.4787	4.09912	4						0.694562	0.308322	4
31.25	92.701	1.89421	4						1.06381	0.429845	4
62.5	90.6299	4.11468	4						1.29599	0.652986	4
125	84.2078	7.97421	4						1.33075	0.50589	4
250	71.2049	10.1992	4						1.81048	1.16791	4
500	52.8072	6.89582	4						7.08038	2.07412	4
1000	34.6067	9.41216	4						11.7398	3.51436	4
2000	16.4543	3.66195	4						20.7329	9.06032	4
4000	15.5543	4.44704	4						21.8979	8.17265	4
8000	11.8448	1.80857	2						9.52817	7.11204	2
