# Supplementary material for: Distinct architectural requirements for the parS centromeric sequence of the pSM19035 plasmid partition machinery
Source: eLife journal article supplement (doi:10.7554/elife.79480), 2022-09-05
Supplement: supp [file elife_poa_e79480_Figure_2_source_data_1.xlsx]

## Sheet: Fig 2B
Figure 2B
		ATP buffer wash				nsDNA wash				ParB wash				ParB-3RparS wash				ParB-4RparS wash				ParB-7RparS wash
Time(min)		Mean	SEM	n		Mean	SEM	n		Mean	SEM	n		Mean	SEM	n		Mean	SEM	n		Mean	SEM	n
0		1	0	3		1	0	3		0.99134	0.00468447	4		1	0	3		0.99956	0.000439744	5		0.999441	0.000559138	6
0.017		0.983086	0.00202204	3		0.949812	0.0229626	3		0.994758	0.00346931	4		0.985467	0.00525885	3		0.986602	0.00283813	5		0.99443	0.00183609	6
0.033		0.988637	0.0006803	3		0.9489	0.024023	3		0.987387	0.00202626	4		0.975621	0.00807591	3		0.986734	0.00386486	5		0.992314	0.00283055	6
0.05		0.978067	0.00808129	3		0.949024	0.018941	3		0.98796	0.00671765	4		0.968925	0.011286	3		0.988192	0.00334424	5		0.98847	0.00361534	6
0.067		0.973958	0.00501531	3		0.943709	0.0208067	3		0.98248	0.00696268	4		0.962644	0.00351198	3		0.983868	0.00450814	5		0.983755	0.00168548	6
0.083		0.977548	0.00235688	3		0.927508	0.0172276	3		0.9758	0.00906563	4		0.95885	0.0108328	3		0.969885	0.00763708	5		0.977747	0.0023715	6
0.1		0.975394	0.0053587	3		0.926639	0.0217631	3		0.969326	0.00928056	4		0.959883	0.00985775	3		0.966727	0.00830028	5		0.979014	0.00483376	6
0.117		0.968301	0.00469418	3		0.923657	0.021862	3		0.969972	0.0101655	4		0.951935	0.00990509	3		0.96642	0.00967639	5		0.972883	0.005145	6
0.133		0.973387	0.0065798	3		0.921657	0.0245135	3		0.967005	0.00741953	4		0.947517	0.00888212	3		0.955015	0.00933791	5		0.963712	0.00264519	6
0.15		0.972758	0.00800273	3		0.918855	0.0209638	3		0.960721	0.00725704	4		0.946313	0.0115286	3		0.947581	0.00969607	5		0.952743	0.00482645	6
0.167		0.971282	0.00585434	3		0.916784	0.0220832	3		0.964559	0.00487172	4		0.943807	0.0102134	3		0.937845	0.0118578	5		0.939831	0.00235738	6
0.183		0.96939	0.00845828	3		0.913602	0.0241272	3		0.96302	0.00660649	4		0.941441	0.00834655	3		0.926615	0.0135795	5		0.927722	0.00419909	6
0.2		0.965373	0.00550852	3		0.910645	0.0232269	3		0.957658	0.00730473	4		0.944774	0.00843913	3		0.917079	0.0129135	5		0.917532	0.00406	6
0.217		0.969555	0.00788265	3		0.909087	0.0234454	3		0.952794	0.00697637	4		0.942404	0.0109215	3		0.898412	0.0160765	5		0.903753	0.00619005	6
0.233		0.968979	0.00738913	3		0.909485	0.0239689	3		0.957407	0.00609699	4		0.930041	0.015919	3		0.882385	0.0174555	5		0.885866	0.00571949	6
0.25		0.967822	0.00707446	3		0.907288	0.0210677	3		0.95288	0.00459843	4		0.930972	0.0131697	3		0.862102	0.019212	5		0.870186	0.00669861	6
0.267		0.963256	0.00872265	3		0.904645	0.0215363	3		0.952498	0.00868395	4		0.931366	0.00924101	3		0.843441	0.0195604	5		0.852584	0.0101024	6
0.283		0.962675	0.00803573	3		0.904698	0.0234801	3		0.94862	0.00836704	4		0.932583	0.0133703	3		0.822822	0.0215411	5		0.835301	0.0109321	6
0.3		0.958904	0.0101149	3		0.89363	0.0191896	3		0.953835	0.00722545	4		0.920094	0.0173958	3		0.805209	0.0232562	5		0.816574	0.011527	6
0.317		0.960097	0.00963603	3		0.894755	0.0218811	3		0.94847	0.00820405	4		0.922835	0.0156399	3		0.785754	0.0248753	5		0.79206	0.0135777	6
0.333		0.96422	0.00871325	3		0.899395	0.0226802	3		0.947737	0.00979827	4		0.922252	0.0160883	3		0.767231	0.0263858	5		0.772343	0.0167434	6
0.35		0.9566	0.0105842	3		0.893293	0.0233112	3		0.949908	0.00887387	4		0.922787	0.00802587	3		0.742393	0.0264518	5		0.753726	0.0197457	6
0.367		0.9572	0.00902165	3		0.892211	0.0209426	3		0.942304	0.0112499	4		0.91443	0.0126767	3		0.722913	0.0264137	5		0.735144	0.0181434	6
0.383		0.959292	0.010357	3		0.88939	0.023131	3		0.941147	0.00971579	4		0.907903	0.0122065	3		0.702908	0.0285076	5		0.714461	0.0200614	6
0.4		0.959329	0.00809151	3		0.88621	0.0189887	3		0.942332	0.0104484	4		0.919762	0.0100454	3		0.68092	0.0275455	5		0.701398	0.0219661	6
0.417		0.959371	0.00996549	3		0.880326	0.0199066	3		0.938627	0.00977748	4		0.917047	0.0129966	3		0.660638	0.0286459	5		0.683498	0.0254482	6
0.433		0.957847	0.00805103	3		0.878544	0.0220144	3		0.939777	0.00784255	4		0.912594	0.0145176	3		0.642018	0.0291359	5		0.651218	0.027899	6
0.45		0.960626	0.00780198	3		0.88341	0.0220067	3		0.934058	0.00940438	4		0.908061	0.0152274	3		0.623976	0.0300401	5		0.633111	0.0304244	6
0.467		0.953752	0.0078767	3		0.877261	0.0193485	3		0.930109	0.0117484	4		0.907592	0.0119499	3		0.60671	0.030211	5		0.613429	0.0318349	6
0.483		0.955817	0.00725109	3		0.873574	0.0220738	3		0.933231	0.0123352	4		0.905983	0.0144193	3		0.592755	0.0349325	5		0.5958	0.033208	6
0.5		0.956978	0.00985359	3		0.876192	0.0212972	3		0.932278	0.0118039	4		0.90107	0.0134376	3		0.577196	0.0374166	5		0.576184	0.0365416	6
0.517		0.956026	0.0122626	3		0.869203	0.0193932	3		0.926562	0.0104522	4		0.903412	0.0100293	3		0.550285	0.0299495	5		0.559907	0.037502	6
0.533		0.958572	0.00893646	3		0.868789	0.0201146	3		0.924665	0.0120369	4		0.903808	0.0130548	3		0.531602	0.0301759	5		0.540933	0.0384994	6
0.55		0.962379	0.00972487	3		0.87359	0.021764	3		0.918096	0.0124829	4		0.896269	0.0177425	3		0.513888	0.0287085	5		0.525614	0.0397692	6
0.567		0.954351	0.00935721	3		0.864345	0.0194013	3		0.918046	0.0108625	4		0.897715	0.0168427	3		0.497414	0.0286039	5		0.510229	0.0406646	6
0.583		0.956265	0.0114125	3		0.872442	0.0256069	3		0.918975	0.0115827	4		0.898353	0.0144055	3		0.484796	0.0284074	5		0.494089	0.0421974	6
0.6		0.947882	0.00825903	3		0.864641	0.0190329	3		0.914454	0.0128787	4		0.882155	0.016596	3		0.464321	0.0292402	5		0.475725	0.0432141	6
0.617		0.950937	0.0143048	3		0.859725	0.0192845	3		0.910258	0.0123602	4		0.900004	0.017161	3		0.447654	0.0288593	5		0.46033	0.0433801	6
0.633		0.949985	0.0124543	3		0.86296	0.023351	3		0.90857	0.0116566	4		0.891265	0.014298	3		0.435178	0.0304155	5		0.447606	0.0448901	6
0.65		0.951386	0.00919152	3		0.861267	0.0202676	3		0.90893	0.014635	4		0.887311	0.0186379	3		0.416596	0.0280266	5		0.434584	0.0456785	6
0.667		0.947924	0.00804691	3		0.857416	0.0203087	3		0.904319	0.012137	4		0.886409	0.0133663	3		0.405157	0.0272462	5		0.420445	0.0478471	6
0.683		0.946927	0.0112582	3		0.852097	0.016875	3		0.905207	0.0119598	4		0.888251	0.0181735	3		0.390652	0.0272123	5		0.404837	0.0485264	6
0.7		0.954264	0.0063345	3		0.856655	0.0225343	3		0.898347	0.0160997	4		0.881083	0.0136571	3		0.37606	0.0262562	5		0.392937	0.0494278	6
0.717		0.951708	0.012295	3		0.848553	0.018566	3		0.899673	0.0169437	4		0.889454	0.0153112	3		0.362958	0.027175	5		0.377462	0.0498558	6
0.733		0.951646	0.0100376	3		0.847686	0.0195908	3		0.895624	0.0142539	4		0.88174	0.0172328	3		0.352098	0.0254286	5		0.362771	0.051238	6
0.75		0.951316	0.0100751	3		0.845012	0.0207791	3		0.892377	0.0146382	4		0.882439	0.0159125	3		0.335295	0.0253545	5		0.353046	0.0511623	6
0.767		0.952995	0.00982559	3		0.849624	0.0198809	3		0.893263	0.0143708	4		0.879832	0.0170172	3		0.327505	0.0243967	5		0.338533	0.0526486	6
0.783		0.946489	0.00826996	3		0.845133	0.0200496	3		0.885933	0.0164588	4		0.873989	0.0149992	3		0.316016	0.0232607	5		0.32636	0.0530869	6
0.8		0.964303	0.00454002	3		0.844858	0.0213089	3		0.885224	0.0148553	4		0.874544	0.0160607	3		0.304327	0.0240902	5		0.315029	0.055066	6
0.817		0.959519	0.00728949	3		0.842325	0.019445	3		0.887461	0.0159085	4		0.875024	0.0173526	3		0.294334	0.0231996	5		0.301518	0.0550135	6
0.833		0.945692	0.00788572	3		0.843959	0.0210676	3		0.879926	0.0163146	4		0.87013	0.0167799	3		0.281226	0.0221965	5		0.293974	0.0553533	6
0.85		0.944485	0.00931859	3		0.846526	0.0239617	3		0.879051	0.0152731	4		0.868204	0.0199715	3		0.275039	0.0218558	5		0.284341	0.0548727	6
0.867		0.943037	0.0107988	3		0.846424	0.0197836	3		0.876969	0.0141568	4		0.868952	0.0179122	3		0.263428	0.0219245	5		0.274997	0.0559821	6
0.883		0.950098	0.0089884	3		0.838133	0.0190776	3		0.872479	0.0149762	4		0.863315	0.0190785	3		0.253812	0.0207019	5		0.265612	0.0543953	6
0.9		0.940956	0.00758409	3		0.834446	0.0193293	3		0.864518	0.0167668	4		0.861604	0.0179016	3		0.244898	0.0209562	5		0.255634	0.0539564	6
0.917		0.94224	0.00430398	3		0.838273	0.0213812	3		0.867371	0.0153941	4		0.860111	0.0159171	3		0.236157	0.0191478	5		0.248313	0.0541851	6
0.933		0.946146	0.0087014	3		0.834252	0.017376	3		0.870994	0.0168072	4		0.858439	0.0179817	3		0.228929	0.0189835	5		0.239816	0.0537302	6
0.95		0.950855	0.0132563	3		0.832722	0.0223099	3		0.862585	0.0166773	4		0.876539	0.0139938	3		0.221193	0.0183198	5		0.23198	0.0539596	6
0.967		0.947113	0.0106036	3		0.834548	0.0211857	3		0.864105	0.0151145	4		0.875942	0.0101137	3		0.212855	0.0165983	5		0.223936	0.0537423	6
0.983		0.948545	0.00278206	3		0.828927	0.018372	3		0.857975	0.013681	4		0.886021	0.0125377	3		0.205214	0.0169152	5		0.217803	0.0527947	6
1		0.951859	0.0106657	3		0.83272	0.0228704	3		0.855838	0.0174416	4		0.858116	0.0158946	3		0.197655	0.0173269	5		0.211477	0.0532863	6
1.017		0.949945	0.00898705	3		0.824108	0.0178628	3		0.85297	0.0141734	4		0.854227	0.0201429	3		0.19136	0.0163857	5		0.204003	0.0515567	6
1.033		0.944816	0.00555091	3		0.823359	0.0172888	3		0.849589	0.0198113	4		0.8527	0.0135069	3		0.18531	0.0157341	5		0.194829	0.0502237	6
1.05		0.952903	0.00762528	3		0.828517	0.0234395	3		0.842516	0.0160808	4		0.850797	0.0181463	3		0.178207	0.0162196	5		0.190453	0.0500749	6
1.067		0.949875	0.00400847	3		0.828291	0.019335	3		0.85019	0.0167122	4		0.857665	0.0158394	3		0.170118	0.0153954	5		0.1833	0.0499363	6
1.083		0.946347	0.00675574	3		0.822281	0.019255	3		0.844241	0.0165057	4		0.849325	0.0172038	3		0.163847	0.0142434	5		0.177602	0.0483966	6
1.1		0.950757	0.00831118	3		0.821233	0.019975	3		0.843023	0.018121	4		0.855521	0.0188412	3		0.159639	0.0135061	5		0.171624	0.0483921	6
1.117		0.952993	0.0104653	3		0.821306	0.0202681	3		0.840067	0.0174777	4		0.849872	0.0179358	3		0.1542	0.0135533	5		0.166942	0.0479657	6
1.133		0.946631	0.00870379	3		0.816641	0.0184892	3		0.835581	0.0161349	4		0.848653	0.0165388	3		0.149719	0.013089	5		0.160836	0.0472972	6
1.15		0.945	0.00709436	3		0.812747	0.019172	3		0.83335	0.0157765	4		0.836763	0.0169341	3		0.1428	0.0124336	5		0.155958	0.0461591	6
1.167		0.949439	0.00723526	3		0.818385	0.0218166	3		0.833893	0.0193891	4		0.836177	0.0172336	3		0.137168	0.0125367	5		0.151833	0.0455371	6
1.183		0.94707	0.00799408	3		0.816369	0.0198374	3		0.830016	0.0198518	4		0.839928	0.0159518	3		0.132918	0.0120983	5		0.14609	0.0450221	6
1.2		0.948827	0.0056536	3		0.810616	0.0186898	3		0.823065	0.0157617	4		0.830918	0.0170711	3		0.129373	0.0117841	5		0.142577	0.0443708	6
1.217		0.948778	0.00691886	3		0.808143	0.0180122	3		0.817376	0.0175424	4		0.831845	0.0167041	3		0.125055	0.0104917	5		0.138389	0.0434411	6
1.233		0.941046	0.00574453	3		0.815312	0.0224926	3		0.820405	0.0182709	4		0.832989	0.0158517	3		0.119381	0.010532	5		0.133307	0.0422914	6
1.25		0.944582	0.00473014	3		0.81225	0.0209295	3		0.819641	0.0182101	4		0.830829	0.0167377	3		0.115386	0.0104752	5		0.131026	0.0425038	6
1.267		0.945559	0.00929605	3		0.810532	0.0185094	3		0.818861	0.0202402	4		0.830574	0.0181059	3		0.111903	0.00971538	5		0.126124	0.0410159	6
1.283		0.947363	0.0136443	3		0.809223	0.0192983	3		0.815801	0.0161364	4		0.82756	0.0165791	3		0.107795	0.00901307	5		0.122248	0.0408887	6
1.3		0.954661	0.0207002	3		0.81135	0.0195443	3		0.814442	0.0181845	4		0.826414	0.0158794	3		0.105316	0.00850347	5		0.119488	0.0400047	6
1.317		0.947591	0.0154046	3		0.807848	0.0189073	3		0.812639	0.0157865	4		0.830455	0.0183263	3		0.101796	0.00855116	5		0.116151	0.0397252	6
1.333		0.938111	0.00807453	3		0.806496	0.0204104	3		0.807692	0.0168956	4		0.825059	0.0201329	3		0.0989405	0.00833976	5		0.112876	0.0390194	6
1.35		0.938787	0.0119495	3		0.805735	0.0205776	3		0.808088	0.0186213	4		0.824368	0.0202192	3		0.0950804	0.00811402	5		0.108659	0.0378335	6
1.367		0.941226	0.00841918	3		0.804002	0.0180907	3		0.804405	0.0163247	4		0.819292	0.0165227	3		0.0923682	0.00781601	5		0.104893	0.0372593	6
1.383		0.94105	0.00920674	3		0.798418	0.017238	3		0.803431	0.0187182	4		0.823519	0.0190776	3		0.0885538	0.00769445	5		0.101783	0.0360263	6
1.4		0.941136	0.00712498	3		0.79797	0.0185108	3		0.797734	0.0175384	4		0.816487	0.0210658	3		0.0859283	0.00688891	5		0.0990632	0.0356173	6
1.417		0.932761	0.0127335	3		0.795377	0.0175804	3		0.805403	0.0197073	4		0.824276	0.0198162	3		0.0837414	0.00606071	5		0.095601	0.0348548	6
1.433		0.934104	0.0100402	3		0.79765	0.0206183	3		0.800603	0.0194566	4		0.812188	0.0215162	3		0.080913	0.00629028	5		0.0933965	0.0345463	6
1.45		0.93713	0.0113621	3		0.794636	0.0191264	3		0.794277	0.019903	4		0.81238	0.018265	3		0.0780472	0.00617728	5		0.0898416	0.0333677	6
1.467		0.938533	0.0058496	3		0.792982	0.0193499	3		0.792301	0.0187423	4		0.816725	0.0224182	3		0.0752532	0.0058325	5		0.0885907	0.0336667	6
1.483		0.941008	0.0067971	3		0.788703	0.0173154	3		0.793218	0.0186488	4		0.815629	0.0205227	3		0.0716698	0.00662482	5		0.0857645	0.0330028	6
1.5		0.940843	0.00644977	3		0.798317	0.0227664	3		0.783888	0.0185821	4		0.814703	0.016269	3		0.0706319	0.00557493	5		0.083507	0.0319795	6
1.517		0.936274	0.0117146	3		0.790848	0.0174604	3		0.784802	0.0198202	4		0.807214	0.0170512	3		0.0677094	0.0052244	5		0.0796702	0.030324	6
1.533		0.939362	0.0029974	3		0.788296	0.0186591	3		0.780816	0.0195907	4		0.803073	0.0208377	3		0.0647587	0.00539812	5		0.0773008	0.029259	6
1.55		0.933569	0.0108054	3		0.789069	0.0185812	3		0.782389	0.0198427	4		0.803183	0.0198424	3		0.0652745	0.00489704	5		0.0751197	0.0284179	6
1.567		0.938114	0.00924027	3		0.790324	0.0199651	3		0.778886	0.0195552	4		0.806902	0.0199611	3		0.0624097	0.00494862	5		0.072372	0.0281062	6
1.583		0.935551	0.0090154	3		0.788119	0.0181685	3		0.774492	0.0193883	4		0.804671	0.0176444	3		0.0595653	0.00449843	5		0.0709459	0.0279089	6
1.6		0.937763	0.00675617	3		0.785308	0.0172439	3		0.775519	0.0178676	4		0.80575	0.0226108	3		0.0579908	0.00487838	5		0.0683215	0.0277366	6
1.617		0.935931	0.0101064	3		0.782329	0.0176015	3		0.769657	0.0199372	4		0.801206	0.0213441	3		0.0567112	0.00427983	5		0.0665306	0.0264351	6
1.633		0.935053	0.0140693	3		0.791936	0.0224303	3		0.769291	0.0181543	4		0.797714	0.0187015	3		0.054643	0.00439867	5		0.0645532	0.0263327	6
1.65		0.932996	0.0105955	3		0.785345	0.0205733	3		0.76834	0.0189639	4		0.802843	0.0180102	3		0.0520903	0.00465389	5		0.0629598	0.0255499	6
1.667		0.931864	0.0114	3		0.783409	0.0201881	3		0.760814	0.0174645	4		0.800461	0.0220047	3		0.0502123	0.00516168	5		0.060907	0.0247793	6
1.683		0.930034	0.00920821	3		0.785922	0.0208137	3		0.766477	0.0187106	4		0.800877	0.0184312	3		0.0490871	0.00403497	5		0.0591419	0.0237272	6
1.7		0.929742	0.0104782	3		0.784677	0.0215886	3		0.760142	0.0186889	4		0.793684	0.0181105	3		0.0483831	0.00399987	5		0.0577653	0.0236697	6
1.717		0.93374	0.0083776	3		0.779814	0.0186415	3		0.757914	0.0205904	4		0.795349	0.0233576	3		0.0463942	0.00365714	5		0.0554739	0.0230493	6
1.733		0.934817	0.0071919	3		0.781559	0.019838	3		0.758751	0.0160851	4		0.790842	0.0196165	3		0.0448219	0.00426493	5		0.0545091	0.0225591	6
1.75		0.927644	0.00917002	3		0.773462	0.0180849	3		0.751516	0.0205222	4		0.790944	0.020783	3		0.0436512	0.00369709	5		0.0533621	0.0221858	6
1.767		0.936651	0.00585101	3		0.777247	0.0197234	3		0.748655	0.0178593	4		0.789718	0.021281	3		0.0427498	0.00362469	5		0.0516734	0.0215283	6
1.783		0.935436	0.0107069	3		0.772188	0.0180478	3		0.752408	0.0182753	4		0.791252	0.0217516	3		0.0418126	0.0034823	5		0.050796	0.0209683	6
1.8		0.935142	0.00772546	3		0.772688	0.0191273	3		0.743357	0.0194947	4		0.787972	0.0231191	3		0.0399419	0.00323226	5		0.0498968	0.0209742	6
1.817		0.931589	0.0109097	3		0.774873	0.0233191	3		0.744982	0.0208013	4		0.782112	0.0211403	3		0.0386946	0.00342367	5		0.0479189	0.0196067	6
1.833		0.931011	0.0075466	3		0.764269	0.0171827	3		0.739357	0.0194553	4		0.785166	0.0234033	3		0.0369157	0.00341166	5		0.0467961	0.0200377	6
1.85		0.931316	0.0108057	3		0.768104	0.0207082	3		0.737387	0.0178526	4		0.779876	0.0231589	3		0.0361488	0.00341804	5		0.0453736	0.0188312	6
1.867		0.929989	0.00932607	3		0.762098	0.0174489	3		0.735986	0.0207806	4		0.777313	0.0218078	3		0.0344164	0.00392326	5		0.0433875	0.0188957	6
1.883		0.931907	0.0118547	3		0.766513	0.0194766	3		0.735376	0.0212261	4		0.776631	0.0245431	3		0.0333377	0.00361082	5		0.0424752	0.0182986	6
1.9		0.930656	0.00721632	3		0.765347	0.0169889	3		0.733181	0.0190769	4		0.775353	0.017868	3		0.0332923	0.0035152	5		0.0406284	0.0181221	6
1.917		0.923958	0.0090797	3		0.765766	0.0207977	3		0.731229	0.018857	4		0.781549	0.0228876	3		0.0318098	0.00325469	5		0.0409221	0.0174283	6
1.933		0.937762	0.00593091	3		0.761279	0.0166819	3		0.729681	0.0184219	4		0.777599	0.0208577	3		0.0305514	0.00367817	5		0.0400367	0.0172144	6
1.95		0.940802	0.00876421	3		0.762315	0.0176677	3		0.726211	0.0198004	4		0.77902	0.0255014	3		0.0293245	0.00314745	5		0.0384539	0.0165261	6
1.967		0.930425	0.00466386	3		0.764392	0.0191675	3		0.726417	0.0201312	4		0.772392	0.0243102	3		0.0290525	0.00343674	5		0.0383939	0.0162956	6
1.983		0.928634	0.0065402	3		0.761395	0.0210673	3		0.723927	0.0167899	4		0.767213	0.0248637	3		0.0270965	0.00329464	5		0.0366302	0.0162121	6
2		0.929033	0.0102056	3		0.760719	0.0177815	3		0.722919	0.0184882	4		0.767296	0.0220516	3		0.0271617	0.00305081	5		0.0365249	0.0159611	6
2.017		0.92643	0.0123118	3		0.756432	0.0183722	3		0.723681	0.0216073	4		0.763123	0.02542	3		0.0251898	0.00341838	5		0.0345143	0.0158476	6
2.033		0.930601	0.0084598	3		0.758444	0.0194208	3		0.719144	0.0184011	4		0.764476	0.0225397	3		0.0245391	0.00316972	5		0.0342444	0.0150456	6
2.05		0.924693	0.00702975	3		0.757194	0.0196962	3		0.713963	0.0227603	4		0.765825	0.0228627	3		0.0243266	0.00282453	5		0.0335714	0.0148685	6
2.067		0.924972	0.00652584	3		0.758328	0.019152	3		0.710552	0.0198056	4		0.756351	0.0230127	3		0.0230718	0.00312076	5		0.0322971	0.0143079	6
2.083		0.930764	0.00865354	3		0.758079	0.0193215	3		0.711534	0.0224415	4		0.763527	0.0244906	3		0.0207287	0.0040082	5		0.0311702	0.0134709	6
2.1		0.926373	0.00782861	3		0.75158	0.0164676	3		0.704199	0.0221609	4		0.759277	0.0237423	3		0.0201863	0.00396307	5		0.031161	0.0135569	6
2.117		0.92984	0.0105492	3		0.754414	0.0188098	3		0.707837	0.0205858	4		0.75416	0.020771	3		0.01934	0.00395746	5		0.0296156	0.0135939	6
2.133		0.92146	0.0113227	3		0.753122	0.0187511	3		0.70452	0.0219772	4		0.759329	0.0230658	3		0.0175243	0.00395457	4		0.0289865	0.0131903	6
2.15		0.925203	0.0125872	3		0.753322	0.0205074	3		0.698848	0.0219063	4		0.751125	0.0227164	3		0.0165272	0.00392994	4		0.0282402	0.0127082	6
2.167		0.928453	0.00707315	3		0.751568	0.0182347	3		0.702899	0.0192196	4		0.754717	0.0245166	3		0.0166498	0.0037709	4		0.0271443	0.0120461	6
2.183		0.929658	0.00536022	3		0.74658	0.0193483	3		0.698639	0.0206188	4		0.750933	0.0244894	3		0.0186921	0.00294688	3		0.0268279	0.0117336	6
2.2		0.921681	0.00951257	3		0.749793	0.0186317	3		0.697088	0.0206906	4		0.749959	0.0216359	3		0.0181744	0.00320676	3		0.02575	0.0117851	6
2.217		0.924974	0.0129658	3		0.748791	0.0207346	3		0.692146	0.0226547	4		0.742165	0.0243097	3		0.0165871	0.00384778	3		0.0252088	0.0112206	6
2.233		0.92375	0.00771651	3		0.74475	0.0195465	3		0.687961	0.0205284	4		0.745083	0.0248234	3		0.0163173	0.00280811	3		0.024814	0.0113389	6
2.25		0.927433	0.00940543	3		0.748581	0.0207842	3		0.690415	0.0214744	4		0.744639	0.0236435	3		0.0142189	0.0031667	3		0.0237536	0.0110887	6
2.267		0.924435	0.00850158	3		0.746519	0.0195418	3		0.686302	0.0207284	4		0.746277	0.0227752	3		0.0151507	0.00269863	3		0.0230631	0.0105416	6
2.283		0.920131	0.00941575	3		0.742984	0.0175205	3		0.69034	0.0216098	4		0.735499	0.0228023	3		0.0136216	0.00370795	3		0.0233179	0.00986681	6
2.3		0.926215	0.00610724	3		0.738679	0.0166485	3		0.684151	0.0241242	4		0.740419	0.0253534	3		0.0128141	0.00311886	3		0.0219792	0.00968818	6
2.317		0.918171	0.00762592	3		0.744432	0.0204037	3		0.685404	0.0206425	4		0.744504	0.0243344	3		0.0117778	0.0036487	3		0.0215287	0.00947122	6
2.333		0.918218	0.00786724	3		0.737027	0.0173873	3		0.681702	0.0192574	4		0.737349	0.0254619	3		0.0121533	0.00275768	3		0.0207507	0.00968323	6
2.35		0.915449	0.0074906	3		0.73763	0.0203912	3		0.678589	0.0203283	4		0.740802	0.026225	3		0.0147909	0.00166768	2		0.0200688	0.00886897	6
2.367		0.922978	0.00681266	3		0.737525	0.0180128	3		0.678974	0.0233965	4		0.736291	0.0256871	3		0.0152276	0.00105481	2		0.0197328	0.0093616	6
2.383		0.915312	0.0110591	3		0.738967	0.0176662	3		0.676368	0.019758	4		0.735731	0.0264812	3		0.014639	0.00171982	2		0.0196551	0.0086424	6
2.4		0.919089	0.0106285	3		0.740527	0.021755	3		0.671498	0.0205241	4		0.731584	0.0272172	3		0.013742	0.0014674	2		0.019048	0.00805489	6
2.417		0.92252	0.00790604	3		0.736391	0.0167799	3		0.672725	0.02082	4		0.727034	0.0297454	3		0.0136927	0.00145471	2		0.0190729	0.00841515	6
2.433		0.920259	0.00839526	3		0.729105	0.0142231	3		0.671031	0.0191713	4		0.728573	0.025194	3		0.0121164	0.00221743	2		0.0177016	0.00765608	6
2.45		0.922132	0.00380806	3		0.730033	0.0180747	3		0.665965	0.0198814	4		0.727981	0.0280611	3		0.0111266	0.00253606	2		0.017605	0.00742539	6
2.467		0.919959	0.00629119	3		0.734194	0.0183926	3		0.665294	0.0219744	4		0.722966	0.0303136	3		0.0107166	0.0018878	2		0.0173797	0.00754453	6
2.483		0.919756	0.0110172	3		0.738088	0.0199701	3		0.660268	0.0205824	4		0.721775	0.0292721	3		0.0108985	0.0017435	2		0.0167372	0.00755444	6
2.5		0.918877	0.00747195	3		0.73121	0.0156544	3		0.658256	0.0185818	4		0.723242	0.0262478	3		0.0106725	0.00163761	2		0.0163964	0.00730438	6
2.517		0.916914	0.0110889	3		0.730653	0.0183633	3		0.659572	0.0201742	4		0.719167	0.027006	3		0.0103251	0.00114006	2		0.0156765	0.00745839	6
2.533		0.918717	0.00952036	3		0.732527	0.0199065	3		0.655123	0.0212947	4		0.717	0.0288962	3		0.0104875	0.00179848	2		0.0141933	0.00670236	6
2.55		0.917196	0.00523751	3		0.727855	0.0161482	3		0.653401	0.0220343	4		0.718698	0.0259926	3		0.00941597	0.00213952	2		0.0174994	0.00664236	5
2.567		0.914328	0.012023	3		0.727416	0.0186993	3		0.649612	0.0204413	4		0.71884	0.0283521	3		0.00952347	0.00155921	2		0.0158678	0.00709597	5
2.583		0.915134	0.00581187	3		0.731846	0.0189987	3		0.651497	0.0197166	4		0.717737	0.0303719	3		0.00911959	0.00178537	2		0.0150802	0.0069345	5
2.6		0.91439	0.0082715	3		0.724296	0.0181264	3		0.64806	0.018094	4		0.719424	0.0289945	3		0.0108547		1		0.0143251	0.00670589	5
2.617		0.91646	0.009406	3		0.724518	0.0176102	3		0.650895	0.0219769	4		0.715028	0.0305513	3		0.0111556		1		0.0143176	0.00692827	5
2.633		0.918291	0.00573272	3		0.727035	0.0195705	3		0.641174	0.0229168	4		0.716746	0.029592	3		0.00992895		1		0.0137891	0.00655965	5
2.65		0.919475	0.00515553	3		0.727859	0.0208917	3		0.645508	0.0191591	4		0.712492	0.0269738	3		0.0103224		1		0.0146652	0.0070513	4
2.667		0.912824	0.00650776	3		0.726249	0.019711	3		0.642876	0.0210344	4		0.718003	0.0319777	3		0.0107159		1		0.01587	0.00669153	4
2.683		0.919267	0.00866018	3		0.724491	0.0191265	3		0.638491	0.0222162	4		0.710151	0.0301411	3		0.010091		1		0.0148906	0.0068583	4
2.7		0.91607	0.00513988	3		0.726309	0.0228037	3		0.6389	0.0222516	4		0.707944	0.0323609	3		0.00988266		1		0.0182471	0.00665887	3
2.717		0.913242	0.0113237	3		0.752326	0.0357664	3		0.636721	0.0213736	4		0.706432	0.0292936	3		0.00999838		1		0.0193217	0.00651782	3
2.733		0.914206	0.0108816	3		0.726943	0.0218633	3		0.634735	0.0226408	4		0.703476	0.0314205	3		0.00923461		1		0.0174388	0.00621939	3
2.75		0.917071	0.0101593	3		0.717418	0.0186059	3		0.632527	0.0210667	4		0.70669	0.0312142	3		0.00872544		1		0.0179595	0.00661664	3
2.767		0.917992	0.0119964	3		0.722815	0.0200407	3		0.629195	0.0228976	4		0.704579	0.0321537	3		0.00823941		1		0.0181106	0.00660085	3
2.783		0.920816	0.00974715	3		0.723287	0.0167474	3		0.627977	0.0205948	4		0.702746	0.0310693	3		0.00816997		1		0.0209649	0.00483347	3
2.8		0.909361	0.00989309	3		0.718614	0.020172	3		0.625714	0.0216464	4		0.702507	0.0307214	3		0.00828569		1		0.0345197	0.00842451	3
2.817		0.911598	0.00935289	3		0.717746	0.0218867	3		0.626523	0.022657	4		0.700788	0.0312667	3		0.00819312		1		0.0331107	0.0085894	3
2.833		0.910955	0.00738879	3		0.713388	0.0196268	3		0.627996	0.0209453	4		0.695881	0.0305346	3		0.00733677		1		0.014497	0.0058184	3
2.85		0.909907	0.0110397	3		0.711581	0.0201375	3		0.621381	0.0200541	4		0.693305	0.0326175	3		0.00717476		1		0.0152792	0.00508185	3
2.867		0.914395	0.00776724	3		0.711936	0.0193236	3		0.618703	0.0209157	4		0.69107	0.0330826	3		0.00738306		1		0.0149404	0.00488115	3
2.883		0.913388	0.0109357	3		0.710819	0.0222336	3		0.613555	0.0223662	4		0.69328	0.0316332	3		0.00738306		1		0.0145313	0.00455805	3
2.9		0.917988	0.00450459	3		0.711235	0.0209405	3		0.615124	0.0227451	4		0.692052	0.0308035	3		0.00689703		1		0.0205466	0.0030954	2
2.917		0.915759	0.00888543	3		0.710416	0.0196355	3		0.613239	0.0210976	4		0.691044	0.034468	3		0.00636471		1		0.01987	0.00337302	2
2.933		0.912457	0.0103505	3		0.707934	0.0207526	3		0.609694	0.0217411	4		0.685445	0.0346873	3		0.00631842		1		0.0191829	0.00248182	2
2.95		0.915968	0.012312	3		0.70465	0.0177993	3		0.612265	0.0217235	4		0.686369	0.0338714	3		0.00654986		1		0.0177297	0.00248479	2
2.967		0.915304	0.0082926	3		0.70452	0.0198468	3		0.607944	0.0234219	4		0.690697	0.0326592	3		0.00615641		1		0.0177661	0.00259935	2
2.983		0.909156	0.00790806	3		0.70465	0.0194424	3		0.608586	0.0211106	4		0.685511	0.035249	3		0.00664244		1		0.0179584	0.00244311	2
3		0.914306	0.00646995	3		0.705008	0.0202991	3		0.606783	0.0211422	4		0.687099	0.0317746	3		0.00608698		1		0.017655	0.00241494	2
3.017		0.908552	0.00749238	3		0.702428	0.0184935	3		0.602943	0.020471	4		0.686987	0.0336964	3		0.00567038		1		0.0152626	0.00187563	2
3.033		0.908719	0.010176	3		0.704794	0.0214876	3		0.60108	0.0215555	4		0.68819	0.0368435	3		0.00678131		1		0.0152292	0.00137523	2
3.05		0.912783	0.00955841	3		0.700587	0.0198369	3		0.597512	0.0218454	4		0.677888	0.0342261	3		0.00490661		1		0.0153392	0.00178621	2
3.067		0.909972	0.00808771	3		0.69877	0.0181888	3		0.597489	0.0228252	4		0.677291	0.0348253	3		0.00460574		1		0.0156672	0.00222951	2
3.083		0.911912	0.0116228	3		0.699884	0.0199672	3		0.596186	0.0200982	4		0.680453	0.0375965	3		0.00530007		1		0.0151807	0.0018551	2
3.1		0.91152	0.00819969	3		0.697943	0.0193637	3		0.594616	0.023555	4		0.676251	0.0402245	3		0.00539264		1		0.0152447	0.00199894	2
3.117		0.910699	0.00901297	3		0.700104	0.0196141	3		0.591725	0.0206793	4		0.673527	0.0370154	3		0.00481403		1		0.0129299	0.00114364	2
3.133		0.910078	0.00979528	3		0.699661	0.0213072	3		0.591508	0.0204079	4		0.670734	0.0339405	3		0.0049529		1		0.0141693	0.00144488	2
3.15		0.912749	0.00846156	3		0.697875	0.0201126	3		0.59157	0.0188167	4		0.667831	0.0351597	3		0.00405027		1		0.0139281	0.00142594	2
3.167		0.910479	0.0125607	3		0.697329	0.0167471	3		0.584179	0.0200914	4		0.668863	0.0382822	3		0.00418914		1		0.0138297	0.00100827	2
3.183		0.915708	0.0101357	3		0.695648	0.0191475	3		0.583692	0.0204446	4		0.669241	0.0350958	3		0.00455945		1		0.0135423	0.00101606	2
3.2		0.91194	0.00816636	3		0.696716	0.019879	3		0.583364	0.021654	4		0.664507	0.0368035	3		0.00442058		1		0.013262	0.000974519	2
3.217		0.907256	0.0121185	3		0.688931	0.0184916	3		0.584094	0.0205625	4		0.668986	0.0364596	3		0.00421228		1		0.0125055	0.00107235	2
3.233		0.911551	0.0066404	3		0.691604	0.0182566	3		0.582282	0.020451	4		0.663536	0.036622	3		0.00446687		1		0.0120171	0.000857212	2
3.25		0.907436	0.00481045	3		0.693702	0.0218138	3		0.579996	0.0215446	4		0.667975	0.0349966	3		0.00492976		1		0.012376	0.001599	2
3.267		0.91004	0.00709763	3		0.691097	0.0184111	3		0.573951	0.0216473	4		0.663259	0.0359716	3		0.00374939		1		0.0122305	0.00114076	2
3.283		0.908874	0.00691322	3		0.691443	0.0195438	3		0.576897	0.0220821	4		0.660235	0.0374858	3		0.00543893		1		0.0123352	0.0014418	2
3.3		0.913991	0.00657427	3		0.693814	0.0215718	3		0.573007	0.0218239	4		0.661037	0.0372573	3		0.00664244		1		0.0116038	0.00136699	2
3.317		0.907137	0.010289	3		0.686183	0.017687	3		0.571776	0.0225265	4		0.660847	0.0366748	3		0.00573981		1		0.0115005	0.00149444	2
3.333		0.908055	0.00633783	3		0.683646	0.0184032	3		0.572816	0.020107	4		0.660111	0.0374604	3		0.00798482		1		0.0111962	0.00139896	2
3.35		0.907797	0.00712894	3		0.679383	0.0180673	3		0.566924	0.0226534	4		0.662014	0.037932	3		0.00678131		1		0.0102208	0.000448237	2
3.367		0.910342	0.00901709	3		0.680665	0.0168477	3		0.566056	0.0223055	4		0.65605	0.03666	3		0.00611012		1		0.00980748	0.000958016	2
3.383		0.906617	0.0076595	3		0.68321	0.0212744	3		0.565469	0.0221665	4		0.658255	0.0378532	3		0.00638785		1		0.010255	0.00101595	2
3.4		0.913634	0.00647791	3		0.681366	0.0205754	3		0.567142	0.0218343	4		0.655123	0.0374594	3		0.00717476		1		0.00904516	0.000584715	2
3.417		0.912248	0.00892267	3		0.678973	0.0166853	3		0.561021	0.0208963	4		0.651506	0.0378886	3		0.00773023		1		0.00850251	0.00037833	2
3.433		0.907646	0.00542665	3		0.674357	0.0167434	3		0.560059	0.0212228	4		0.650266	0.0357168	3		0.00604069		1		0.00827677	3.41646e-05	2
3.45		0.904305	0.00817803	3		0.676426	0.019146	3		0.553944	0.0219492	4		0.64931	0.0359618	3		0.00597125		1		0.00792513	0.000191991	2
3.467		0.91437	0.0120488	3		0.679407	0.0200909	3		0.557751	0.0202692	4		0.641929	0.0370719	3		0.00629528		1		0.00772504	3.63739e-05	2
3.483		0.914027	0.0104808	3		0.684605	0.020968	3		0.552581	0.0204675	4		0.644086	0.0354355	3		0.00791538		1		0.0074605	0.000324675	2
3.5		0.907067	0.00909253	3		0.677785	0.0201101	3		0.554156	0.0206849	4		0.637038	0.0356936	3		0.00611012		1		0.00919396	0.000363237	2
3.517		0.906598	0.00930843	3		0.67932	0.0208182	3		0.552166	0.0201248	4		0.635921	0.037427	3		0.0068276		1		0.00785951	8.64556e-05	2
3.533		0.905042	0.00990039	3		0.674512	0.0173188	3		0.546056	0.020617	4		0.638306	0.036893	3		0.00530007		1		0.0062037		1
3.55		0.905444	0.00643972	3		0.670076	0.0181696	3		0.540529	0.0205919	4		0.637246	0.0351268	3		0.00428171		1		0.00703704		1
3.567		0.912513	0.00428598	3		0.672545	0.0192962	3		0.546148	0.0201001	4		0.642999	0.0372899	3		0.004328		1		0.00756944		1
3.583		0.903038	0.00719799	3		0.672978	0.0189324	3		0.542116	0.0193437	4		0.635394	0.0382987	3		0.00407341		1		0.00673611		1
3.6		0.907555	0.00794571	3		0.675896	0.0211078	3		0.541247	0.0203798	4		0.641475	0.0403522	3		0.0059944		1		0.00740741		1
3.617		0.908744	0.00954178	3		0.672826	0.0185364	3		0.540839	0.0223091	4		0.634682	0.0411924	3		0.0057861		1		0.0062037		1
3.633		0.906036	0.0079661	3		0.674082	0.0199817	3		0.539032	0.0212289	4		0.632852	0.0393912	3		0.00449001		1		0.00664352		1
3.65		0.910136	0.00841697	3		0.672158	0.0194837	3		0.540267	0.0199358	4		0.634399	0.0380233	3		0.00541579		1		0.00701389		1
3.667		0.906644	0.0117026	3		0.669015	0.017981	3		0.537444	0.0217573	4		0.628581	0.0377471	3		0.00509177		1		0.00685185		1
3.683		0.904203	0.0125854	3		0.66912	0.0208361	3		0.536318	0.0200098	4		0.629152	0.0405743	3		0.00275418		1		0.00652778		1
3.7		0.91144	0.0071989	3		0.672537	0.0173894	3		0.531562	0.0191966	4		0.626693	0.039652	3		0.00465202		1		0.00618056		1
3.717		0.899165	0.00402389	3		0.673195	0.0186745	3		0.530299	0.0202951	4		0.628294	0.0379889	3		0.0039114		1		0.00673611		1
3.733		0.906928	0.00693781	3		0.664175	0.0165809	3		0.529665	0.0219366	4		0.623463	0.0397505	3		0.00425857		1		0.00625		1
3.75		0.9064	0.00711063	3		0.664315	0.0176388	3		0.524602	0.0203738	4		0.630231	0.0376324	3		0.00296248		1		0.00627315		1
3.767		0.907467	0.00803945	3		0.663987	0.0179255	3		0.524075	0.0221663	4		0.623183	0.0377779	3		0.00273104		1		0.0055787		1
3.783		0.89871	0.00895162	3		0.662861	0.0192826	3		0.524893	0.0216642	4		0.626338	0.0385412	3		0.00444372		1		0.0062037		1
3.8		0.905179	0.0106351	3		0.664574	0.0199821	3		0.521884	0.0207102	4		0.619684	0.0397601	3		0.00310135		1		0.00601852		1
3.817		0.898265	0.00952814	3		0.659917	0.0186556	3		0.521111	0.0193768	4		0.620661	0.0405422	3		0.00141181		1		0.00664352		1
3.833		0.901001	0.00557759	3		0.656079	0.0179621	3		0.519525	0.020933	4		0.616392	0.0390269	3						0.00597222		1
3.85		0.902747	0.00952905	3		0.653792	0.0174037	3		0.519112	0.0213862	4		0.61809	0.0401021	3						0.0049537		1
3.867		0.908266	0.00406795	3		0.657206	0.0179735	3		0.515625	0.0209704	4		0.61393	0.0431424	3						0.00648148		1
3.883		0.904372	0.00523521	3		0.660167	0.0185541	3		0.512477	0.0206717	4		0.619173	0.0425503	3						0.00662037		1
3.9		0.901193	0.0116324	3		0.654712	0.0157878	3		0.515446	0.0212099	4		0.608842	0.0420796	3						0.00541667		1
3.917		0.909424	0.00809911	3		0.650764	0.0171522	3		0.512233	0.0217246	4		0.610483	0.0367669	3						0.00560185		1
3.933		0.899157	0.00535627	3		0.659897	0.0206422	3		0.510217	0.0212362	4		0.607288	0.04082	3						0.00583333		1
3.95		0.90595	0.00718676	3		0.657806	0.0167427	3		0.508615	0.0193733	4		0.609517	0.0417462	3						0.00534722		1
3.967		0.902394	0.00737663	3		0.655234	0.0187001	3		0.504304	0.0209992	4		0.608765	0.0380679	3						0.00518519		1
3.983		0.899708	0.00962362	3		0.657386	0.0187048	3		0.506086	0.0200711	4		0.610496	0.0403241	3						0.00497685		1
4		0.904535	0.00838793	3		0.652585	0.0171055	3		0.504458	0.0216345	4		0.606403	0.0432138	3						0.00527778		1
4.017		0.904972	0.0109453	3		0.65333	0.0189525	3		0.514961	0.0258079	4		0.606154	0.0381948	3						0.005		1
4.033		0.902808	0.00750944	3		0.654464	0.0187443	3		0.516967	0.0251028	4		0.604683	0.0419428	3						0.00493056		1
4.05		0.90843	0.0111166	3		0.652298	0.0171817	3		0.502322	0.019989	4		0.603585	0.0433808	3						0.00407407		1
4.067		0.899391	0.00633247	3		0.652399	0.0185001	3		0.499823	0.0228558	4		0.613264	0.0490087	3						0.00474537		1
4.083		0.901924	0.00417982	3		0.651518	0.0184937	3		0.496064	0.0224323	4		0.623164	0.065251	3						0.00516204		1
4.1		0.903547	0.00736598	3		0.65073	0.0181802	3		0.493208	0.0224286	4		0.630957	0.071421	3						0.00476852		1
4.117		0.901968	0.00621784	3		0.650524	0.0193512	3		0.494043	0.0208451	4		0.598528	0.0405018	3						0.00518519		1
4.133		0.894863	0.00861046	3		0.642508	0.014313	3		0.493743	0.0202348	4		0.596474	0.0414638	3						0.00483796		1
4.15		0.893708	0.0070351	3		0.648068	0.0200684	3		0.490689	0.0229075	4		0.595357	0.0422295	3						0.00451389		1
4.167		0.897867	0.00728878	3		0.649135	0.0190954	3		0.491564	0.0205151	4		0.594185	0.0437454	3						0.00456019		1
4.183		0.900074	0.0107335	3		0.642302	0.015148	3		0.489552	0.0211485	4		0.593593	0.0418942	3						0.00479167		1
4.2		0.898285	0.00899262	3		0.64332	0.0182318	3		0.488857	0.0194375	4		0.593645	0.0427851	3						0.00439815		1
4.217		0.899092	0.00985659	3		0.637936	0.0149573	3		0.4848	0.0200077	4		0.59483	0.0411774	3						0.00490741		1
4.233		0.897724	0.00580758	3		0.641812	0.016636	3		0.482703	0.0212799	4		0.592497	0.0434292	3						0.00444444		1
4.25		0.904802	0.00581613	3		0.642446	0.0174679	3		0.481432	0.0207886	4		0.592427	0.0455857	3						0.00525463		1
4.267		0.903253	0.00604503	3		0.640845	0.0174975	3		0.483201	0.0188424	4		0.590698	0.047717	3						0.0044213		1
4.283		0.900117	0.00709247	3		0.641481	0.0174412	3		0.480381	0.0206246	4		0.588538	0.0462861	3						0.00446759		1
4.3		0.892566	0.00742589	3		0.636633	0.0132343	3		0.478199	0.0202347	4		0.58788	0.0438713	3						0.00449074		1
4.317		0.898637	0.0087543	3		0.636034	0.0150465	3		0.477816	0.0217209	4		0.585121	0.046273	3						0.00421296		1
4.333		0.897439	0.00592952	3		0.635589	0.0174699	3		0.475557	0.0216499	4		0.589616	0.0457837	3						0.00375		1
4.35		0.90233	0.00900254	3		0.636567	0.0159397	3		0.475138	0.0168394	4		0.58384	0.0459368	3						0.00423611		1
4.367		0.897562	0.005531	3		0.634989	0.0137536	3		0.470817	0.0215267	4		0.589354	0.0468471	3						0.00328704		1
4.383		0.899801	0.00829572	3		0.636905	0.0178912	3		0.469412	0.0186335	4		0.585035	0.0428884	3						0.00386574		1
4.4		0.900936	0.00630924	3		0.633831	0.0142599	3		0.468085	0.0194691	4		0.583984	0.0449425	3						0.0037963		1
4.417		0.906847	0.00586983	3		0.628835	0.0162829	3		0.469676	0.0204981	4		0.586318	0.0493989	3						0.00416667		1
4.433		0.895242	0.00893584	3		0.632373	0.0177938	3		0.465672	0.0197274	4		0.578046	0.0509914	3						0.00456019		1
4.45		0.896767	0.00664707	3		0.63008	0.0138036	3		0.464702	0.0202219	4		0.580235	0.0475624	3						0.00405093		1
4.467		0.900736	0.00831407	3		0.629204	0.0164097	3		0.463153	0.0212158	4		0.577853	0.0454521	3						0.0043287		1
4.483		0.894331	0.0098753	3		0.630257	0.0159985	3		0.465472	0.0196898	4		0.57802	0.0485803	3						0.00435185		1
4.5		0.900884	0.00812544	3		0.6269	0.0149945	3		0.46212	0.0200225	4		0.576375	0.0459466	3						0.00407407		1
4.517		0.89915	0.00704073	3		0.625207	0.0141714	3		0.458636	0.0198745	4		0.57498	0.0491507	3						0.00377315		1
4.533		0.897326	0.00706713	3		0.629281	0.016535	3		0.463205	0.0212054	4		0.572923	0.0459062	3						0.00451389		1
4.55		0.898168	0.00469944	3		0.624643	0.0152982	3		0.454114	0.0201152	4		0.568873	0.0488682	3						0.00372685		1
4.567		0.902425	0.00516257	3		0.619678	0.0140555	3		0.454256	0.0188288	4		0.569485	0.048514	3						0.00377315		1
4.583		0.902983	0.00605527	3		0.620609	0.0145191	3		0.456169	0.0198917	4		0.570038	0.0477955	3
4.6		0.905174	0.00570054	3		0.622415	0.017923	3		0.449451	0.0195426	4		0.566437	0.0485933	3
4.617		0.900317	0.00727325	3		0.623259	0.0174368	3		0.452492	0.0174437	4		0.566663	0.044143	3
4.633		0.90225	0.00487029	3		0.619801	0.0147332	3		0.449938	0.0181244	4		0.565049	0.0466354	3
4.65		0.902936	0.00457181	3		0.619158	0.0168803	3		0.449294	0.0190739	4		0.567645	0.0481303	3
4.667		0.89636	0.00472574	3		0.618884	0.0162653	3		0.445615	0.0198194	4		0.563469	0.0473114	3
4.683		0.898767	0.00813072	3		0.619852	0.0145072	3		0.445521	0.0197603	4		0.559579	0.0447606	3
4.7		0.894687	0.00614069	3		0.612998	0.0154219	3		0.445289	0.0178963	4		0.561825	0.0483528	3
4.717		0.897474	0.00574267	3		0.618663	0.0176621	3		0.442325	0.0193669	4		0.560453	0.0466784	3
4.733		0.897732	0.00657077	3		0.619711	0.0186578	3		0.44639	0.0188388	4		0.559733	0.0472947	3
4.75		0.892969	0.00747498	3		0.615797	0.0131118	3		0.441174	0.0178619	4		0.556973	0.0485726	3
4.767		0.89465	0.00425507	3		0.614136	0.017227	3		0.440801	0.018688	4		0.553212	0.0459529	3
4.783		0.899375	0.00627598	3		0.615164	0.0173998	3		0.439641	0.0179664	4		0.556609	0.0487535	3
4.8		0.903146	0.00431913	3		0.6123	0.0150985	3		0.43655	0.0193857	4		0.552959	0.0490303	3
4.817		0.898129	0.00634742	3		0.611125	0.016879	3		0.432816	0.0195448	4		0.553723	0.0465409	3
4.833		0.896181	0.00285586	3		0.610418	0.0154	3		0.432195	0.0207359	4		0.554178	0.0466938	3
4.85		0.89782	0.00619193	3		0.611354	0.0151174	3		0.436002	0.0182417	4		0.544105	0.0508805	3
4.867		0.896043	0.0106949	3		0.609393	0.0156813	3		0.431035	0.0197308	4		0.547981	0.0462743	3
4.883		0.898422	0.00968507	3		0.606093	0.0147922	3		0.42977	0.0189645	4		0.546731	0.0510092	3
4.9		0.900419	0.0111494	3		0.608743	0.0167908	3		0.431025	0.018741	4		0.5475	0.0473877	3
4.917		0.897224	0.0104275	3		0.608063	0.0163484	3		0.431648	0.0187231	4		0.545299	0.0477011	3
4.933		0.885041	0.00543587	3		0.606311	0.0169241	3		0.427644	0.0190811	4		0.546608	0.0492862	3
4.95		0.893235	0.0104831	3		0.605141	0.0145428	3		0.423383	0.0197727	4		0.541945	0.049001	3
4.967		0.898902	0.00709008	3		0.605735	0.0194206	3		0.422501	0.0190156	4		0.542225	0.0470278	3
4.983		0.894253	0.0108326	3		0.603027	0.0143681	3		0.418639	0.0205	4		0.5407	0.0484459	3
5		0.895902	0.0101325	3		0.605283	0.0173005	3		0.419673	0.0187286	4		0.539967	0.0500218	3

## Sheet: Fig 2-fig supplement 1
Figure 2-figure supplement 1
		ParA-GFP				ParA D60A-GFP
[ParB] (mM)		Mean	SEM	n		Mean	SEM	n
0		1.29173	0.507765	5		1.98933	0.559498	5
0.031		0.611	0.290496	3		2.672	0.0482709	3
0.063		1.07053	0.291519	3		2.50853	0.332283	3
0.125		1.72441	0.355737	3		3.58174	0.385004	3
0.25		2.85609	0.426424	3		2.67142	0.187186	3
0.5		5.26845	0.481453	3		2.17372	0.501155	5
1		13.4673	0.744409	5		1.8813	0.587486	5
2		17.5683	1.01917	5		1.83728	0.615756	5
4		24.5516	2.12904	5		1.79763	0.495584	5

## Sheet: Fig 2-fig supplement 2
Figure 2-figure supplement 1 (A top panel)															Figure 2-figure supplement 1 (A bottom panel)							Figure 2-figure supplement 1 (B top panel)											Figure 2-figure supplement 1 (B bottom panel)
		ParA(apo)-GFP				ParA(ATP)-GFP				ParAD60A(ATP)-GFP							Baseline corrected							ParA(ATP)-GFP				ParAD60A(ATP)-GFP							ParB-Alexa647
Time (min)		Mean	SEM	n		Mean	SEM	n		Mean	SEM	n			Time (min)		Mean	SEM	n			Time (min)		Mean	SEM	n		Mean	SEM	n			Time (min)		Mean	SEM	n
0		0	14.8235	3		0	7.507	4		5.68434e-14	8.96326	3			0		0	32.1539	4			0		43247.1	2262.1	2		38493.7	2728.75	2			0		4108.8	451.735	3
0.017		-21.1333	10.9713	3		27.6	8.29809	4		12.3667	7.27927	3			0.017		59.7	39.5054	4			0.017		42131.7	1284.75	2		38052.4	2690.2	2			0.017		3893.4	542.278	3
0.033		-15.5	11.0343	3		56.2	12.9151	4		30.3333	10.6742	3			0.033		54	38.0383	4			0.033		42011.5	1345.4	2		36652.8	4094.25	2			0.033		3790.53	527.485	3
0.05		-23.8333	10.5642	3		84.825	15.525	4		-27.1333	63.6973	3			0.05		78.825	34.3014	4			0.05		41808.7	1429.25	2		36410.8	4176.9	2			0.05		3853.8	500.229	3
0.067		-8.06667	11.2908	3		96.8	20.4637	4		41.4667	11.0277	3			0.067		151.6	69.3731	4			0.067		41740.3	1534.3	2		36407.6	4175.5	2			0.067		3714.97	465.144	3
0.083		-13.9667	11.209	3		119.45	19.1183	4		35.9	25.375	3			0.083		69.3	50.7885	4			0.083		41297.3	1211.65	2		36191.7	4164.55	2			0.083		3783.5	458.858	3
0.1		0	15.859	3		147.3	27.4665	4		22.5667	47.7976	3			0.1		60.1	41.0125	4			0.1		41162.5	1190.9	2		36046.2	4085	2			0.1		3796.6	472.033	3
0.117		-5.53333	15.8133	3		182.025	24.5037	4		47.9667	38.6625	3			0.117		122.125	66.9389	4			0.117		41043.5	1364.4	2		35939.1	4185.25	2			0.117		3538.67	466.137	3
0.133		-2	17.6579	3		217.7	33.0779	4		66.3333	21.8114	3			0.133		75.875	54.4652	4			0.133		40879.4	1404.65	2		35687.4	4205.05	2			0.133		3541.97	420.39	3
0.15		29.7333	33.1524	3		244.35	30.2966	4		74.7667	25.8833	3			0.15		74.325	53.2145	4			0.15		40766.6	1420.35	2		35453.8	4114.7	2			0.15		3461.63	559.835	3
0.167		15.8667	31.4834	3		250.55	38.2961	4		49.1333	55.6416	3			0.167		144.8	75.5344	4			0.167		40655.2	1506.6	2		35232.4	3985.8	2			0.167		2892.6	582.507	3
0.183		44.1667	63.0476	3		273.725	43.9683	4		56.8	61.9145	3			0.183		192.175	55.2043	4			0.183		40671.3	1361.9	2		35201.6	3949	2			0.183		2640.2	599.863	3
0.2		48.7667	63.2787	3		320.975	52.4036	4		81.8	48.9077	3			0.2		126.125	60.2193	4			0.2		40591.6	1378.05	2		34953.2	3977.9	2			0.2		2446.9	603.25	3
0.217		48.3333	67.618	3		355.2	50.1688	4		85.1667	51.3539	3			0.217		149.775	64.8795	4			0.217		40498	1407.7	2		34999	3847.8	2			0.217		2190.7	570.855	3
0.233		65.5333	88.7514	3		378	47.9755	4		82.9333	67.1537	3			0.233		122.55	48.7258	4			0.233		40458.9	1426.95	2		34810.8	3832.75	2			0.233		2089.77	485.252	3
0.25		70.4667	97.3721	3		414.725	49.5828	4		83.4	79.0297	3			0.25		140.475	54.5228	4			0.25		40412.7	1490.25	2		34620.2	3744.65	2			0.25		2006.87	439.202	3
0.267		78.8333	99.0188	3		443.725	56.7836	4		85.9667	87.4368	3			0.267		197.125	122.354	4			0.267		40387.8	1388.65	2		34439.2	3677.7	2			0.267		1885.5	530.674	3
0.283		39.5333	52.5564	3		473.95	57.0371	4		81.9667	88.2442	3			0.283		208.675	55.094	4			0.283		40333.8	1377.45	2		34410.3	3669.9	2			0.283		1726.43	421.204	3
0.3		69.2667	80.5297	3		523.8	58.6544	4		116.3	75.1928	3			0.3		273.475	70.9832	4			0.3		40200.3	1455.1	2		34323.7	3668.25	2			0.3		1666.7	410.001	3
0.317		60.1667	66.0396	3		552.475	63.5436	4		135.133	69.334	3			0.317		197.075	51.046	4			0.317		40265.7	1440.05	2		34247.3	3664.75	2			0.317		1815.73	500.615	3
0.333		66.7333	80.4147	3		583.025	63.0278	4		105.333	124.298	3			0.333		148.65	26.6222	4			0.333		40192.9	1427.85	2		34271.9	3681.8	2			0.333		1565.17	433.965	3
0.35		74.1667	76.6295	3		624.175	71.2413	4		147.7	106.496	3			0.35		160.275	23.8871	4			0.35		40150.4	1354.65	2		33876.8	3646.15	2			0.35		1576.17	441.503	3
0.367		62.9	68.3764	3		648.7	74.3959	4		189.267	106.199	3			0.367		142.675	75.3936	4			0.367		39992.6	1355.9	2		33883.9	3685.8	2			0.367		1534.63	434.286	3
0.383		106.567	103.706	3		692.05	68.9198	4		189.933	145.697	3			0.383		301.775	55.5131	4			0.383		40074.1	1511.45	2		33838.8	3713.6	2			0.383		1717.17	427.826	3
0.4		91.6333	86.1599	3		714.8	72.5251	4		205.833	188.499	3			0.4		265.8	71.1174	4			0.4		40034.2	1414.5	2		33689.6	3564.6	2			0.4		1679.97	496.413	3
0.417		123.867	114.985	3		746.775	76.9307	4		305.033	177.884	3			0.417		283.5	91.0255	4			0.417		40025.6	1418.95	2		33727.9	3716.15	2			0.417		1485	433.922	3
0.433		128.767	109.321	3		786.75	74.6321	4		329.9	230.911	3			0.433		408.75	101.136	4			0.433		39878.2	1469.6	2		33431.7	3670.9	2			0.433		1485.2	424.325	3
0.45		129.1	108.56	3		829.65	77.7934	4		404.367	244.211	3			0.45		233.05	87.3119	4			0.45		39891.2	1395.65	2		33479.3	3521.9	2			0.45		1572	476.675	3
0.467		134.167	112.683	3		879.85	79.9936	4		476.033	262.131	3			0.467		348.55	72.0006	4			0.467		39872.3	1447.2	2		33454.3	3557.4	2			0.467		1414.2	455.769	3
0.483		150.833	111.797	3		904.225	79.084	4		515.8	312.671	3			0.483		329.625	69.7188	4			0.483		39826	1380.7	2		33387.7	3475.2	2			0.483		1488.37	419.582	3
0.5		152.833	115.645	3		933.475	86.0654	4		588.133	334.151	3			0.5		420.325	164.134	4			0.5		39699.6	1357.05	2		33382.6	3470.9	2			0.5		1449.83	428.023	3
0.517		158.367	120.87	3		982.025	85.1599	4		627.433	365.004	3			0.517		295.175	123.064	4			0.517		39727.3	1345.95	2		33211.7	3361.05	2			0.517		1307.63	390.34	3
0.533		169.967	117.978	3		1024.92	89.7286	4		726.467	374.404	3			0.533		413.5	65.5211	4			0.533		39722.8	1408.7	2		33245.7	3433.6	2			0.533		1404.27	411.313	3
0.55		185.4	133.398	3		1062.35	92.0361	4		760.933	439.891	3			0.55		417.575	68.0371	4			0.55		39689.6	1389	2		33124.3	3360.4	2			0.55		1540.53	418.028	3
0.567		178.267	121.252	3		1094.5	94.1495	4		814.9	465.759	3			0.567		425.65	130.845	4			0.567		39666.6	1442.95	2		33160.6	3363.85	2			0.567		1398.53	501.416	3
0.583		199.7	133.327	3		1127.8	100.67	4		909.9	469.295	3			0.583		290.15	91.1777	4			0.583		39600.6	1393.9	2		33113.1	3356.15	2			0.583		1432.9	495.861	3
0.6		186	128.394	3		1190.28	91.2602	4		935.333	527.503	3			0.6		313.875	30.2912	4			0.6		39690	1389.3	2		33127.5	3328	2			0.6		1340.43	412.517	3
0.617		173.5	109.02	3		1237.35	98.0239	4		1000.77	549.446	3			0.617		431.4	76.9907	4			0.617		39581.8	1319.75	2		33051.8	3263.85	2			0.617		1336.1	438.909	3
0.633		190.633	113.202	3		1278.05	104.957	4		1078.23	570.004	3			0.633		416.675	72.4955	4			0.633		39559.1	1384.45	2		32966.1	3311.3	2			0.633		1324.8	457.621	3
0.65		204.133	137.76	3		1302.78	99.9254	4		1131.97	596.704	3			0.65		519.825	118.91	4			0.65		39500.2	1398.8	2		32819.2	3332.15	2			0.65		1347.1	479.641	3
0.667		202.7	121.156	3		1357.4	105.719	4		1173.03	657.298	3			0.667		498.375	137.03	4			0.667		39474.1	1351.65	2		32936.1	3296.35	2			0.667		1314.1	483.384	3
0.683		211.633	125.936	3		1395.12	109.848	4		1265.77	665.794	3			0.683		556.8	114.235	4			0.683		39488.9	1348.8	2		32942.4	3320.05	2			0.683		1274.37	442.126	3
0.7		200.8	117.969	3		1439.42	104.297	4		1352.43	674.226	3			0.7		489.35	83.9523	4			0.7		39501.4	1302.8	2		32718.5	3180.05	2			0.7		1223.9	467.186	3
0.717		231.167	152.397	3		1489.22	100.44	4		1393.23	736.806	3			0.717		500.15	122.334	4			0.717		39310.3	1272	2		32660.4	3347	2			0.717		1374.7	401.007	3
0.733		231.833	142.151	3		1535.38	99.258	4		1492.87	740.878	3			0.733		317.275	82.1737	4			0.733		39381.4	1306.1	2		32739.5	3315.6	2			0.733		1369.67	430.12	3
0.75		217.233	126.57	3		1584.75	108.935	4		1593	747.567	3			0.75		611.7	178.386	4			0.75		39403.8	1329.85	2		32699.2	3407.45	2			0.75		1306.87	448.463	3
0.767		253.4	163.675	3		1633.05	107.795	4		1694.13	748.339	3			0.767		538	115.626	4			0.767		39370.8	1362.85	2		32714	3300.9	2			0.767		1389.6	420.304	3
0.783		219.867	132.205	3		1698.65	96.0602	4		1781.4	769.571	3			0.783		572	112.457	4			0.783		39306.2	1279.35	2		32574.8	3268.85	2			0.783		1300.7	419.293	3
0.8		250.2	145.95	3		1719.45	98.1444	4		1880.93	755.908	3			0.8		553.45	116.218	4			0.8		39331.2	1201.55	2		32541.3	3336.6	2			0.8		1327.73	496.15	3
0.817		252.3	154.192	3		1776.05	94.8919	4		1996.77	755.086	3			0.817		557.425	93.734	4			0.817		39277.4	1287.6	2		32537.4	3333	2			0.817		1310.7	511.016	3
0.833		235.033	136.222	3		1822.8	89.4282	4		2075.8	760.49	3			0.833		603.325	117.235	4			0.833		39271.5	1316.9	2		32542	3242.8	2			0.833		1271.9	542.083	3
0.85		236.1	137.786	3		1880.92	91.8829	4		2210.97	770.443	3			0.85		562.75	142.232	4			0.85		39174.8	1334.65	2		32470.7	3233	2			0.85		1380.07	518.78	3
0.867		246.267	162.963	3		1923.85	82.1149	4		2282.2	795.908	3			0.867		606.675	137.559	4			0.867		39170.3	1352.85	2		32425.5	3276.95	2			0.867		1352.73	460.153	3
0.883		210.4	124.944	3		1993.12	91.5281	4		2377.57	833.856	3			0.883		580.725	111.041	4			0.883		39219.7	1323	2		32340.7	3292.25	2			0.883		1301.07	484.995	3
0.9		250.7	148.426	3		2050.43	91.9694	4		2475.77	852.428	3			0.9		633.4	157.17	4			0.9		39083.2	1268.9	2		32440.2	3221.6	2			0.9		1339.27	519.497	3
0.917		248.867	153.928	3		2099.97	91.9355	4		2570.87	865.966	3			0.917		708.55	126.825	4			0.917		39098.7	1342.6	2		32315.2	3203.25	2			0.917		1413.8	481.766	3
0.933		272.767	170.873	3		2162.28	82.0026	4		2691.1	851.353	3			0.933		674.475	149.715	4			0.933		39119.8	1365.75	2		32397.3	3310.55	2			0.933		1319.9	426.544	3
0.95		251.633	157.566	3		2217.97	88.7307	4		2795.47	887.604	3			0.95		666.475	164.638	4			0.95		39055.8	1305.65	2		32293.5	3145.45	2			0.95		1216.8	471.836	3
0.967		240.367	131.894	3		2270.6	92.2308	4		2923.37	879.008	3			0.967		635.575	163.267	4			0.967		39027.7	1357.9	2		32228.2	3097.35	2			0.967		1251.17	509.152	3
0.983		251.8	142.463	3		2325.97	89.105	4		3069.3	881.477	3			0.983		683.975	153.635	4			0.983		39009	1386.8	2		32219.3	3214.6	2			0.983		1267.5	540.832	3
1		255.967	157.949	3		2382.2	91.4816	4		3173.87	940.148	3			1		686.475	173.369	4			1		38989.6	1379.35	2		32277.3	3247.95	2			1		1272.53	435.215	3
1.017		261.7	151.026	3		2432.22	77.2155	4		3312.2	925.344	3			1.017		714.3	153.907	4			1.017		38915.7	1349	2		32257	3203.25	2			1.017		1213.77	451.283	3
1.033		245.5	137.836	3		2500.47	85.7526	4		3473.2	909.09	3			1.033		675.525	200.536	4			1.033		38887.3	1295	2		32272.3	3174.6	2			1.033		1267.67	439.243	3
1.05		262	151.132	3		2541.35	84.8382	4		3570.8	938.958	3			1.05		815.025	169.467	4			1.05		38973.2	1323.9	2		32149.5	3321.45	2			1.05		1263.97	441.871	3
1.067		247.667	135.821	3		2606.97	85.6997	4		3724.9	944.195	3			1.067		733.825	168.321	4			1.067		38883.6	1381.1	2		32052.4	3202.4	2			1.067		1326.83	464.885	3
1.083		263.567	157.383	3		2676.07	80.7697	4		3822.53	1000.38	3			1.083		800.725	196.915	4			1.083		38891.4	1346.9	2		32060.9	3128.7	2			1.083		1255.53	451.639	3
1.1		266.833	155.954	3		2744.95	79.6506	4		3992.43	988.593	3			1.1		756.6	177.69	4			1.1		38909.9	1349.95	2		32056.5	3226.05	2			1.1		1217.87	460.737	3
1.117		247.267	150.448	3		2790.97	81.5796	4		4120.47	986.775	3			1.117		817.725	191.783	4			1.117		38832.9	1351	2		32025.8	3297.15	2			1.117		1221.6	416.469	3
1.133		265.633	157.059	3		2854.28	94.6358	4		4249.77	1013.75	3			1.133		757	207.361	4			1.133		38862	1377.4	2		32009.3	3317.2	2			1.133		1259.6	430.401	3
1.15		274	160.334	3		2920.3	82.3501	4		4313.87	1106.7	3			1.15		1046.05	216.685	4			1.15		38785.9	1464.8	2		31946.9	3224.6	2			1.15		1263.83	375.464	3
1.167		266.967	155.828	3		2971.7	81.5089	4		4500.73	1115.02	3			1.167		962.9	209.163	4			1.167		38694.9	1273.5	2		31998.4	3148.6	2			1.167		1279.13	394.98	3
1.183		272.4	157.66	3		3075.82	97.0709	4		4692.4	1106.36	3			1.183		833.125	231.131	4			1.183		38758.5	1388.4	2		32158.8	3021.4	2			1.183		1256.9	420.772	3
1.2		272.4	155.486	3		3124.72	86.9993	4		4821.87	1117.83	3			1.2		884.625	215.414	4			1.2		38762.3	1326.3	2		31989.9	3097.9	2			1.2		1309.3	480.662	3
1.217		267.933	155.592	3		3172.32	93.5931	4		5015.97	1110.77	3			1.217		786.975	225.964	4			1.217		38746.7	1383.95	2		31931.3	3083.8	2			1.217		1320.97	485.842	3
1.233		272.467	154.993	3		3240.38	94.1165	4		5097.57	1191.65	3			1.233		936.05	227.176	4			1.233		38633.2	1252.25	2		31880.4	3213.2	2			1.233		1305.2	466.723	3
1.25		284.667	174.25	3		3306.82	102.836	4		5230.3	1252.45	3			1.25		813.125	242.15	4			1.25		38688.8	1345.75	2		31927.8	3108.25	2			1.25		1195.6	457.357	3
1.267		255.2	149.577	3		3389.38	119.72	4		5423.47	1270.2	3			1.267		848.425	259.243	4			1.267		38711.6	1309.7	2		31757.7	3037.6	2			1.267		1248.2	480.646	3
1.283		251.7	144.424	3		3465.88	112.015	4		5585.97	1289.3	3			1.283		893.3	257.508	4			1.283		38588.3	1346.3	2		31901.6	3159.2	2			1.283		1175.73	491.947	3
1.3		266.133	154.878	3		3539.72	93.9046	4		5689.97	1384.68	3			1.3		875.275	240.741	4			1.3		38590.1	1451	2		31948.8	3038.55	2			1.3		1215.03	410.697	3
1.317		282.633	166.8	3		3595.6	95.0822	4		5917.37	1367.46	3			1.317		797.3	275.366	4			1.317		38585.4	1358.3	2		31853.3	3162.55	2			1.317		1141.97	466.63	3
1.333		257.3	139.184	3		3665.95	128.353	4		6076.33	1393.57	3			1.333		969.5	269.945	4			1.333		38601.4	1386	2		32138.5	3220.75	2			1.333		1264.3	434.079	3
1.35		280.9	172.685	3		3728.43	124.779	4		6243.37	1453.13	3			1.35		967.2	279.271	4			1.35		38541.3	1341.85	2		31985.3	3025.75	2			1.35		1139.77	430.605	3
1.367		274.333	150.265	3		3820.57	118.693	4		6453.63	1418.38	3			1.367		959.85	262.397	4			1.367		38580.4	1293.55	2		31922.8	2980.1	2			1.367		1276.3	438.43	3
1.383		280.467	155.827	3		3870.32	118.534	4		6601.17	1503.14	3			1.383		1021.3	266.872	4			1.383		38521.6	1313.25	2		31758	3050.65	2			1.383		1187.7	489.56	3
1.4		285	176.563	3		3931.43	119.249	4		6754.17	1603.77	3			1.4		995.475	266.534	4			1.4		38547	1179.2	2		31732.8	3037.9	2			1.4		1232.47	412.411	3
1.417		278.633	150.492	3		4043.6	146.68	4		6961.77	1618.86	3			1.417		943.7	267.034	4			1.417		38573.6	1193.35	2		31784.2	2972.45	2			1.417		1163.37	383.03	3
1.433		272.133	165.504	3		4082.15	135.859	4		7161.4	1605.52	3			1.433		845.95	273.723	4			1.433		38516.7	1249.1	2		31729.3	2985.1	2			1.433		1142.5	434.405	3
1.45		299.2	182.609	3		4147.3	136.123	4		7376.6	1651.58	3			1.45		1009.55	300.718	4			1.45		38448.3	1307.55	2		31833	3016.85	2			1.45		1171.27	445.034	3
1.467		274.333	159.602	3		4231.52	145.477	4		7601.83	1679.26	3			1.467		990.75	300.356	4			1.467		38532.4	1274.1	2		31730.7	3067.15	2			1.467		1270.53	442.325	3
1.483		271.4	161.483	3		4335.25	163.722	4		7823.83	1660.11	3			1.483		1104.8	284.857	4			1.483		38396	1285.3	2		31762.3	2971.15	2			1.483		1122.83	393.644	3
1.5		283.933	168.77	3		4393.82	170.163	4		7987.63	1712.33	3			1.5		981.3	296.228	4			1.5		38421.3	1304.2	2		31638.8	3040.05	2			1.5		1042.43	445.71	3
1.517		264.4	151.757	3		4475	173.109	4		8223.97	1776.41	3			1.517		1136.97	295.533	4			1.517		38269.5	1387.7	2		31841.2	3120.2	2			1.517		1114.93	492.642	3
1.533		275.3	155.598	3		4551.52	183.042	4		8406.03	1813.55	3			1.533		1071.7	296.15	4			1.533		38425.6	1295.9	2		31654.5	3164.05	2			1.533		1089.23	499.666	3
1.55		269.967	152.439	3		4611.02	170.572	4		8661	1835.71	3			1.55		1055.88	300.867	4			1.55		38183.3	1349.3	2		31679.2	3146.05	2			1.55		1124.93	393.617	3
1.567		301.933	169.851	3		4714.2	177.212	4		8903.6	1835.49	3			1.567		1217.83	297.795	4			1.567		38377.4	1242.35	2		31901.3	2936.45	2			1.567		1042.03	333.514	3
1.583		283.167	176.178	3		4788.4	165.15	4		9144.53	1910.74	3			1.583		1085.67	305.848	4			1.583		38313	1257.6	2		31707.8	2917.25	2			1.583		1015.93	320.729	3
1.6		292.767	178.75	3		4884	178.906	4		9331.73	1958.81	3			1.6		876.7	302.925	4			1.6		38299.2	1221.55	2		31671.6	3001.1	2			1.6		990.667	358.286	3
1.617		290.3	177.526	3		4956.35	181.985	4		9658.33	1916.63	3			1.617		1034.88	314.21	4			1.617		38202.4	1200.5	2		31715	3101.95	2			1.617		1081.07	359.065	3
1.633		282.467	165.55	3		5052.23	186.779	4		9864.17	1982.72	3			1.633		1283.55	311.217	4			1.633		38305.3	1220.6	2		31539.1	3102.3	2			1.633		1068.43	349.892	3
1.65		279.267	166.517	3		5123.5	172.893	4		10130.7	1997.38	3			1.65		1086.4	301.577	4			1.65		38402.9	1268.05	2		31614.4	3084.2	2			1.65		1079	447.526	3
1.667		285	167.193	3		5199.48	191.285	4		10473	2005.11	3			1.667		1117.28	333.509	4			1.667		38242.1	1288.3	2		31622.8	3121.55	2			1.667		1013.2	367.003	3
1.683		293.133	177.483	3		5281.57	195.072	4		10741.5	2022.15	3			1.683		1022.12	301.05	4			1.683		38220.3	1322.05	2		31598.1	3072.9	2			1.683		1044	371.62	3
1.7		296.167	180.439	3		5343.82	219.614	4		10935.9	2134.86	3			1.7		1120.95	315.218	4			1.7		38248.6	1216.85	2		31628.9	2978	2			1.7		1034.27	390.441	3
1.717		302.367	172.047	3		5453.2	220.749	4		11235.3	2103.93	3			1.717		1192.5	325.961	4			1.717		38285.3	1278.55	2		31483.2	2922.85	2			1.717		1095.83	390.002	3
1.733		280.633	153.385	3		5493.55	192.79	4		11529.5	2180.1	3			1.733		1026	351.41	4			1.733		38292.7	1279.5	2		31567.2	3072.95	2			1.733		1110	375.025	3
1.75		301.4	178.447	3		5617.55	211.788	4		11859	2181.49	3			1.75		930.2	320.653	4			1.75		38265.2	1255.4	2		31434	3016.75	2			1.75		1066.83	376.996	3
1.767		311.333	188.371	3		5694.1	225.871	4		12245.5	2109.02	3			1.767		1042.9	330.316	4			1.767		38242	1261	2		31615.5	3112.3	2			1.767		993.767	410.269	3
1.783		304.033	176.442	3		5753.68	221.116	4		12502.5	2201.78	3			1.783		1092.17	308.976	4			1.783		38140.4	1309.8	2		31446.2	3203.35	2			1.783		1087.73	395.917	3
1.8		292.833	171.494	3		5840.3	227.971	4		12739.6	2257.35	3			1.8		1149.47	334.021	4			1.8		38102.7	1315.7	2		31594.8	3058.85	2			1.8		1057.2	421.654	3
1.817		294.633	176.821	3		5955.93	245.032	4		13051.5	2339.19	3			1.817		1053.05	336.919	4			1.817		38095.6	1206.75	2		31535.1	3055.5	2			1.817		1082.2	443.253	3
1.833		313.167	186.498	3		6037.07	234.837	4		13307.7	2467.19	3			1.833		1150.35	325.54	4			1.833		38163	1239.6	2		31477.5	3025.25	2			1.833		1044.23	456.249	3
1.85		286.067	179.694	3		6113.45	256.712	4		13789.1	2312.71	3			1.85		1257.65	324.595	4			1.85		38174.5	1300	2		31524.9	2963.7	2			1.85		1097.33	419.426	3
1.867		295.733	170.822	3		6225.2	269.362	4		14069.4	2482.75	3			1.867		1244.6	315.825	4			1.867		38083.3	1236.35	2		31358	3091	2			1.867		1070.7	422.95	3
1.883		309.667	193.155	3		6315.57	274.457	4		14536.2	2399.88	3			1.883		1158.4	342.362	4			1.883		38066.8	1235.35	2		31473	3067.05	2			1.883		1105.87	339.406	3
1.9		321.133	196.101	3		6453.95	284.986	4		14748.6	2533.41	3			1.9		1256.78	323.318	4			1.9		38124.7	1142.95	2		31452.8	3109.95	2			1.9		1078.9	456.058	3
1.917		303.967	186.217	3		6516.57	282.538	4		15209.7	2535.38	3			1.917		1123.1	326.444	4			1.917		37961.7	1202.6	2		31421.2	2941	2			1.917		1067.13	360.67	3
1.933		310.733	179.524	3		6627.68	274.267	4		15413.5	2701.65	3			1.933		1131.08	325.22	4			1.933		38043.3	1208.95	2		31457	3043.35	2			1.933		1066.13	302.515	3
1.95		291.7	170.502	3		6722.82	297.132	4		15975.9	2627.66	3			1.95		1184.65	336.548	4			1.95		38021.8	1234.55	2		31332.2	3069.45	2			1.95		1016.27	332.672	3
1.967		297.167	170.445	3		6789.6	308.71	4		16433.8	2562.27	3			1.967		1095.28	323.313	4			1.967		38091.4	1198.45	2		31337	2986.75	2			1.967		967.433	433.014	3
1.983		286.233	164.224	3		6900.6	308.845	4		16777.6	2662.27	3			1.983		1187.8	340.541	4			1.983		38030.2	1142	2		31383.1	2982.7	2			1.983		1129.77	413.696	3
2		329.433	198.761	3		6982.73	309.027	4		17284.7	2529.3	3			2		1215.35	330.432	4			2		38031.8	1293.55	2		31342.8	3054.45	2			2		1154.83	449.174	3
2.017		315.4	185.7	3		7078.05	300.682	4		17667.1	2627.57	3			2.017		1144.35	336.905	4			2.017		37918	1214.6	2		31352	3018.15	2			2.017		1091.83	453.722	3
2.033		296.3	165.546	3		7112.3	331.654	4		18174.8	2618.04	3			2.033		1247.78	341.935	4			2.033		37925.2	1215.3	2		31204.5	3146.35	2			2.033		1107.33	470.043	3
2.05		331.333	197.575	3		7266.35	340.878	4		18793.8	2511.46	3			2.05		1145.9	342.234	4			2.05		37871.7	1235.85	2		31189.4	3058.1	2			2.05		1164.1	402.044	3
2.067		330.5	200.439	3		7365.55	358.446	4		19367.7	2457.91	3			2.067		1109.53	338.349	4			2.067		37969.3	1284.6	2		31185.2	2967.2	2			2.067		1103.9	356.118	3
2.083		307.933	188.772	3		7470.73	337.386	4		19956.1	2306.35	3			2.083		1172.9	322.562	4			2.083		37910.2	1215.15	2		31171.7	3013.85	2			2.083		1072.57	412.322	3
2.1		325.367	197.724	3		7551.57	350.039	4		20708.2	2160.47	3			2.1		1246.58	364.737	4			2.1		37767.2	1339.05	2		31165.7	2984.35	2			2.1		1058.83	407.012	3
2.117		320.167	190.779	3		7639.2	360.405	4		21401.4	1930.22	3			2.117		1272.67	341.396	4			2.117		37811.2	1241.7	2		31134.8	2968.6	2			2.117		1214.9	385.923	3
2.133		296.067	172.052	3		7766.62	397.834	4		22246.6	1723.4	3			2.133		1202.6	326.861	4			2.133		37893.3	1235	2		31213.8	3065.4	2			2.133		1023	376.075	3
2.15		288.333	169.843	3		7863.7	401.762	4		23209.5	1344.77	3			2.15		1265.85	330.186	4			2.15		37874.6	1248.65	2		31101.9	2975.2	2			2.15		1048.23	361.003	3
2.167		313.4	183.419	3		7929.77	346.225	4		24523.2	977.976	3			2.167		1196.33	343.922	4			2.167		37851.1	1239.4	2		31048	3085.95	2			2.167		1047.33	428.271	3
2.183		303.9	184.132	3		8114.4	432.975	4		25880.6	1164.42	3			2.183		1270.03	358.755	4			2.183		37904.1	1209.25	2		31051.2	2984.75	2			2.183		1161.3	386.47	3
2.2		315.033	184.81	3		8176.5	399.501	4		27268.5	1676.27	3			2.2		1166.15	345.314	4			2.2		37787.7	1236.5	2		30976.9	3058.7	2			2.2		1058.57	412.386	3
2.217		322.2	190.777	3		8336	425.426	4		28840.7	2532.72	3			2.217		1190.38	350.094	4			2.217		37763.5	1263	2		30993.7	3019.45	2			2.217		1062	431.271	3
2.233		309.067	173.832	3		8426.8	456.31	4		30286.6	3255.93	3			2.233		1188.7	341.498	4			2.233		37825.2	1211.25	2		31030.3	3099.7	2			2.233		1088.4	444.498	3
2.25		311.867	184.335	3		8512.67	449.652	4		31424	3768.38	3			2.25		1132.65	327.953	4			2.25		37839.2	1277.1	2		31049.2	3054.85	2			2.25		1021.73	414.899	3
2.267		301.433	175.116	3		8648.77	461.98	4		32225.8	3974.4	3			2.267		1062.3	344.888	4			2.267		37766.2	1255.75	2		30969.9	3046.4	2			2.267		916.6	389.542	3
2.283		310.333	175.862	3		8746.95	463.965	4		32944.1	3998.12	3			2.283		1238.15	362.875	4			2.283		37719.9	1159.5	2		30951	2965.95	2			2.283		980.767	373.763	3
2.3		318.967	180.724	3		8890.48	458.86	4		33457	3842.53	3			2.3		1160.8	348.079	4			2.3		37776.6	1248.05	2		30948.3	2944.35	2			2.3		1015.4	357.498	3
2.317		313.467	195.096	3		8995.7	464.991	4		34243.1	3895.55	3			2.317		1079.2	331.672	4			2.317		37727.2	1314.35	2		30977.4	2986.3	2			2.317		1046.97	381.374	3
2.333		330.8	195.881	3		9079.2	503.288	4		34894.6	3802.01	3			2.333		1256.42	340.855	4			2.333		37681.6	1316.7	2		30966.7	3046.9	2			2.333		1001.3	349.352	3
2.35		319.033	184.892	3		9185.42	473.697	4		35480.2	3569.23	3			2.35		1353.45	410.689	4			2.35		37685.8	1367.7	2		30897	3043.5	2			2.35		1023.83	331.095	3
2.367		315.1	190.894	3		9339.33	531.508	4		36252.4	3560.98	3			2.367		1386.5	351.023	4			2.367		37677.9	1276.85	2		30910.6	3062	2			2.367		960.633	349.212	3
2.383		310.067	180.762	3		9464.02	547.694	4		36904.4	3499.03	3			2.383		1206.05	357.05	4			2.383		37812.2	1263.15	2		30860.5	2958.35	2			2.383		1019.2	326.541	3
2.4		305.933	170.489	3		9549.2	560.971	4		37183.7	3185.44	3			2.4		1436.8	357.396	4			2.4		37683.9	1265.45	2		30752	3015.4	2			2.4		1007.73	320.658	3
2.417		311.967	178.576	3		9703.77	580.642	4		37695.6	3181.65	3			2.417		1348	364.622	4			2.417		37624.8	1390.7	2		30703.7	3127.8	2			2.417		1090.9	317.573	3
2.433		320.467	191.765	3		9779.8	547.651	4		38009.7	3072.22	3			2.433		1417.03	340.682	4			2.433		37653.4	1235	2		30760.6	3039.3	2			2.433		1029.67	387.923	3
2.45		309.067	181.797	3		9896.83	588.684	4		38253.7	2987.37	3			2.45		1283.15	364.178	4			2.45		37682.9	1249.1	2		30740.2	3034.85	2			2.45		1023.57	389.843	3
2.467		300.467	179.885	3		9983.9	557.065	4		38399.7	2862.06	3			2.467		1260.7	356.622	4			2.467		37668	1229	2		30725.5	3103.55	2			2.467		1069	372.422	3
2.483		331.133	188.746	3		10161.8	621.833	4		38661.6	2796.18	3			2.483		1252.7	345.549	4			2.483		37648.9	1222.1	2		30750.8	3081.35	2			2.483		996.833	344.687	3
2.5		333.2	205.391	3		10265.2	641.431	4		38948.2	2835.25	3			2.5		1290.3	350.741	4			2.5		37587.9	1224.6	2		30685.8	3059.95	2			2.5		1121.03	401.916	3
2.517		328.633	193.828	3		10362	630.749	4		38943.1	2727.65	3			2.517		1319.25	359.251	4			2.517		37734.5	1283.7	2		30749	3062.7	2			2.517		1039.8	429.802	3
2.533		317.233	187.765	3		10517.4	681.067	4		39221.1	2799.17	3			2.533		1288.95	361.179	4			2.533		37648.4	1237.2	2		30712.2	3009.35	2			2.533		950.033	473.565	3
2.55		332.633	201.492	3		10646.4	669.757	4		39367.8	2784.22	3			2.55		1328.75	346.891	4			2.55		37781.3	1327.15	2		30710.7	3049.2	2			2.55		1000.67	414.892	3
2.567		308.467	177.486	3		10723.9	684.624	4		39480.6	2847.46	3			2.567		1349.28	365.67	4			2.567		37644.9	1273.9	2		30737.8	2993.35	2			2.567		1015.97	397.062	3
2.583		331.5	204.438	3		10917.5	675.399	4		39376.4	2669.29	3			2.583		1412.2	348.698	4			2.583		37619.9	1234.1	2		30648.5	3073.5	2			2.583		1096.97	420.389	3
2.6		335.233	198.078	3		10991	706.605	4		39444.1	2608.37	3			2.6		1259.62	340.369	4			2.6		37524.1	1227.45	2		30729.7	2840.65	2			2.6		1110.37	487.997	3
2.617		345.3	195.578	3		11119.5	745.81	4		39628.8	2716.56	3			2.617		1447	365.349	4			2.617		37482.1	1193.3	2		30585	3093.1	2			2.617		1048.73	477.302	3
2.633		326.567	193.052	3		11281	764.25	4		39544.5	2641.57	3			2.633		1377.65	368.933	4			2.633		37539.3	1192.7	2		30576.9	2967.3	2			2.633		1066.4	431.832	3
2.65		299.6	183.764	3		11450.5	797.23	4		39647.5	2731.01	3			2.65		1202.15	376.923	4			2.65		37579.7	1193.45	2		30700.5	3037.85	2			2.65		1158.93	402.388	3
2.667		351.567	217.271	3		11540.2	784.226	4		39611.4	2614.52	3			2.667		1481.45	342.115	4			2.667		37558.1	1172.5	2		30470.6	3025.9	2			2.667		919.533	304.814	3
2.683		310.767	185.16	3		11692.2	804.309	4		39752.2	2656.78	3			2.683		1373.75	347.008	4			2.683		37480.4	1271.5	2		30504.5	3054.05	2			2.683		915.667	354.145	3
2.7		330.367	204.772	3		11863.9	876.276	4		39801.1	2725.89	3			2.7		1247.55	334.671	4			2.7		37525.5	1182	2		30552.5	3070.7	2			2.7		925.533	396.602	3
2.717		341.367	206.116	3		11908.8	820.907	4		39856	2765.6	3			2.717		1310.17	339.401	4			2.717		37415	1315.6	2		30532.5	3019.05	2			2.717		1008.33	402.729	3
2.733		365.933	219.468	3		12089.1	801.761	4		39984.8	2848.6	3			2.733		1407.08	345.503	4			2.733		37517.1	1258.85	2		30438.1	3128.3	2			2.733		1162.77	413.449	3
2.75		330.067	208.163	3		12170.7	842.837	4		39845.1	2697.18	3			2.75		1492.67	347.579	4			2.75		37442.5	1241.5	2		30312.6	3168.6	2			2.75		1008.2	428.805	3
2.767		313.1	197.175	3		12320.8	821.597	4		40157.9	2912.58	3			2.767		1269.47	340.288	4			2.767		37536	1261.6	2		30381	3130.3	2			2.767		1012.23	395.018	3
2.783		344.8	209.278	3		12419	861.461	4		39839.1	2719.39	3			2.783		1172.6	338.329	4			2.783		37417.2	1267.75	2		30532.1	3157.5	2			2.783		1026.2	418.138	3
2.8		287.567	158.521	3		12619.5	898.834	4		39913	2742.73	3			2.8		1399	341.536	4			2.8		37453.8	1324.85	2		30273.8	3135.15	2			2.8		1028.3	360.978	3
2.817		327.6	182.14	3		12776	919.011	4		39824.7	2630.12	3			2.817		1280.28	341.183	4			2.817		37433.9	1324.4	2		30415.6	2960.7	2			2.817		849.633	376.972	3
2.833		333.567	208.155	3		12880.7	925.696	4		39842.7	2660.62	3			2.833		1538.67	344.183	4			2.833		37402.9	1266.2	2		30343.7	3060.1	2			2.833		1029.73	325.697	3
2.85		347.833	221.199	3		13036.5	948.351	4		40024.2	2793.12	3			2.85		1201.72	343.976	4			2.85		37430.1	1226.95	2		30325.5	3185.15	2			2.85		933.167	382.128	3
2.867		344.3	209.029	3		13174.2	954.565	4		40050.8	2787.39	3			2.867		1351.9	352.148	4			2.867		37425.5	1304.1	2		30334.7	3098.5	2			2.867		1169.4	386.581	3
2.883		335	208.325	3		13334	978.125	4		40119.4	2786	3			2.883		1447.78	340.326	4			2.883		37461.8	1335.25	2		30315.1	3060.8	2			2.883		1098.83	377.245	3
2.9		334.467	199.954	3		13491	951.477	4		39922.7	2667.82	3			2.9		1268.53	358.476	4			2.9		37369.3	1184.45	2		30299.1	3028.3	2			2.9		981.333	359.071	3
2.917		338.1	200.652	3		13578.1	1008.62	4		40187.6	2858.69	3			2.917		1392.08	360.644	4			2.917		37397.4	1226.6	2		30364.3	3123.7	2			2.917		944.3	378.09	3
2.933		328.067	188.494	3		13723.1	972.476	4		40051.2	2740.52	3			2.933		1323	341.973	4			2.933		37340	1199	2		30427.2	3071.15	2			2.933		954.767	337.407	3
2.95		298.767	175.612	3		13910.2	1028.45	4		40182.5	2806.07	3			2.95		1430.85	369.487	4			2.95		37373.9	1218.45	2		30363.3	3198.35	2			2.95		924.8	367.11	3
2.967		333.167	194.575	3		14022.6	1009.36	4		40183.2	2765.67	3			2.967		1305.75	342.295	4			2.967		37188.6	1155.15	2		30242.6	3102.8	2			2.967		957.3	371.942	3
2.983		344.533	224.652	3		14140.7	990.892	4		40188.2	2696.65	3			2.983		1342.6	376.245	4			2.983		37372.9	1236.5	2		30203.8	3171.15	2			2.983		1066.73	340.814	3
3		336.933	209.235	3		14253.1	990.033	4		40284.8	2807.3	3			3		1417.38	365.774	4			3		37272.1	1144.6	2		30218.2	3153.45	2			3		946.1	402.813	3
3.017		326.067	198.245	3		14388.3	958.29	4		40137.3	2722.98	3			3.017		1359.5	347.34	4			3.017		37267.8	1162.6	2		30228.2	3175.3	2			3.017		1001.23	446.754	3
3.033		330.933	184.603	3		14565.3	956.562	4		40007.8	2644.32	3			3.033		1380.58	340.183	4			3.033		37225.8	1120.85	2		30283	3071.45	2			3.033		970.333	381.547	3
3.05		337.6	201.699	3		14726	1044.25	4		40291.3	2738.24	3			3.05		1479.3	345.045	4			3.05		37230.4	1212.45	2		30211.4	3199.9	2			3.05		972.7	363.012	3
3.067		360.533	223.584	3		14809.8	1006.18	4		40300	2780.08	3			3.067		1257.2	360.824	4			3.067		37249.7	1222.75	2		30210.7	3053.5	2			3.067		984.133	384.43	3
3.083		355.167	229.649	3		14976.3	1018.46	4		40168.2	2693.91	3			3.083		1405.08	343.006	4			3.083		37200.7	1273.85	2		30209.8	3273.2	2			3.083		1014.2	347.496	3
3.1		323.867	194.757	3		15108.9	958.281	4		40409.2	2835.34	3			3.1		1369.62	352.734	4			3.1		37305.2	1214.3	2		30142.5	3083.55	2			3.1		949.767	340.208	3
3.117		324.567	191.378	3		15327.7	1047.07	4		40285.3	2716.72	3			3.117		1490.75	367.233	4			3.117		37217.2	1115.55	2		30106.8	3145.7	2			3.117		1004.53	367.305	3
3.133		314.433	180.545	3		15414.7	1057.79	4		40351	2834.03	3			3.133		1359.6	344.246	4			3.133		37262.7	1175.15	2		30174	3136.1	2			3.133		969.567	385.102	3
3.15		349.967	200.55	3		15464.9	943.587	4		40422.3	2840.42	3			3.15		1484.12	359.74	4			3.15		37106.7	1181.3	2		30062.8	3154.5	2			3.15		900.667	360.613	3
3.167		345.7	210.895	3		15617.2	990.888	4		40462.7	2833.71	3			3.167		1289.47	341.87	4			3.167		37244.7	1117.4	2		30130.2	3181.9	2			3.167		792.267	338.137	3
3.183		338.133	197.008	3		15826.7	1023.9	4		40333.9	2820.06	3			3.183		1366.45	353.677	4			3.183		37154.4	1108.35	2		30245.7	3029.7	2			3.183		925.2	377.138	3
3.2		349.567	229.762	3		15994	998.694	4		40408.2	2851.38	3			3.2		1584.88	351.312	4			3.2		37179.2	1047.95	2		30072.6	3051.2	2			3.2		1019.47	383.592	3
3.217		362.633	222.282	3		16219.6	1089.6	4		40557.9	2861.44	3			3.217		1351.72	357.855	4			3.217		37155.3	1031.2	2		30094	3133.65	2			3.217		944.367	412.742	3
3.233		346.7	203.305	3		16295.7	1024.15	4		40361.9	2725.62	3			3.233		1441.1	349.848	4			3.233		37248.8	1059.85	2		30046.3	3092.25	2			3.233		892.4	432.778	3
3.25		349.8	212.971	3		16512.1	1051.88	4		40428.7	2767.34	3			3.25		1426.83	355.366	4			3.25		37161	1110.7	2		30126.3	3146.55	2			3.25		1046.87	364.844	3
3.267		348.433	214.494	3		16592.3	1030.14	4		40316.5	2831.02	3			3.267		1414.15	360.903	4			3.267		37078.6	1068.4	2		30080.2	3150.35	2			3.267		885.067	389.136	3
3.283		362.567	219.873	3		16782	1014.35	4		40387.5	2801.14	3			3.283		1576.97	371.678	4			3.283		37168.6	1117.2	2		30015.8	3137.4	2			3.283		986.967	368.032	3
3.3		362.233	235.316	3		16929.6	1009.67	4		40371	2757.06	3			3.3		1472.08	349.73	4			3.3		37034.4	1047.5	2		29980	3138.9	2			3.3		862.033	345.807	3
3.317		359.533	219.914	3		17057.1	999.631	4		40503.1	2834.36	3			3.317		1350.85	347.843	4			3.317		37131.6	1026.1	2		30024.8	3160.65	2			3.317		929.067	308.093	3
3.333		366.867	220.866	3		17224.6	1023.33	4		40489.5	2778.36	3			3.333		1617.62	363.633	4			3.333		37051.2	1142.15	2		30055.5	3234.05	2			3.333		829.633	317.645	3
3.35		356.567	221.945	3		17373.7	1008.34	4		40484.4	2829.84	3			3.35		1344.67	363.732	4			3.35		37100.8	1078.65	2		30005.4	3211.6	2			3.35		867.167	434.544	3
3.367		348.433	210.637	3		17529.8	994.693	4		40408.9	2808.24	3			3.367		1756.75	359.013	4			3.367		37088.7	1061.45	2		30052.8	3157.55	2			3.367		931.433	378.616	3
3.383		363.167	231.213	3		17644.9	984.693	4		40489	2824.4	3			3.383		1476.28	349.296	4			3.383		37039.4	1192.75	2		30002.7	3228.35	2			3.383		950.133	339.242	3
3.4		352.467	212.621	3		17747.7	998.66	4		40495.4	2831.99	3			3.4		1483.2	349.287	4			3.4		37120.3	1108.95	2		29885.9	3268.1	2			3.4		955.7	309.23	3
3.417		360.767	216.107	3		17916.7	1052.67	4		40525.6	2844.65	3			3.417		1514.65	358.125	4			3.417		37062.6	1035.9	2		30019.2	3182	2			3.417		904.767	323.153	3
3.433		384.033	231.011	3		18054.3	984.502	4		40462.3	2849.56	3			3.433		1500.53	349.55	4			3.433		37094.4	1191.55	2		30079.2	3220.4	2			3.433		836.033	354.595	3
3.45		348.833	220.804	3		18302.9	1010.02	4		40520	2873.77	3			3.45		1500.4	379.722	4			3.45		37045.7	1089.65	2		29905.7	3193.55	2			3.45		861.333	324.618	3
3.467		345.3	213.926	3		18514.5	1039.16	4		40523.4	2860.43	3			3.467		1448.53	359.681	4			3.467		36936.8	1151.8	2		29879	3106.6	2			3.467		859.533	326.505	3
3.483		352.933	212.392	3		18568.3	1050.89	4		40410.7	2792.17	3			3.483		1567.7	369.866	4			3.483		36914.4	1145.85	2		29899.6	3126.7	2			3.483		945.067	300.995	3
3.5		379.8	222.591	3		18704.1	991.725	4		40469.9	2796.67	3			3.5		1549.92	348.917	4			3.5		37029.3	996.4	2		29888.2	3152.15	2			3.5		1036.77	306.78	3
3.517		354.867	232.068	3		18865.1	1007.28	4		40509.5	2839.35	3			3.517		1511.3	377.163	4			3.517		37069.2	1156	2		29808.6	3144	2			3.517		885.667	323.46	3
3.533		365.433	225.508	3		18999.1	965.811	4		40445.6	2678.56	3			3.533		1409.92	347.911	4			3.533		37031.9	1122.15	2		29877.5	3078.15	2			3.533		878.167	320.851	3
3.55		349.033	213.389	3		19242.7	1040.13	4		40346.5	2715.97	3			3.55		1426.6	363.625	4			3.55		37023.1	1089.4	2		29990	3219.3	2			3.55		859.6	370.44	3
3.567		351.833	202.964	3		19368.8	1011.12	4		40276.7	2606.59	3			3.567		1559.25	362.073	4			3.567		37010.6	1063.95	2		29844.6	3171	2			3.567		961.5	359.068	3
3.583		366.233	212.874	3		19592.3	1021.37	4		40426.4	2769.19	3			3.583		1513.33	354.165	4			3.583		36949.6	1085.45	2		29859	3198.65	2			3.583		913.6	388.516	3
3.6		357.033	214.604	3		19727.9	1006.75	4		40510.4	2762.57	3			3.6		1452.92	373.297	4			3.6		36956.1	1107.15	2		29780	3078.8	2			3.6		828.1	320.59	3
3.617		384.933	246.755	3		19920.1	1034.33	4		40525.2	2808.26	3			3.617		1544	351.622	4			3.617		36913.1	1155.5	2		29791.6	3149.3	2			3.617		896.467	354.861	3
3.633		355.733	216.67	3		20143.8	1052.2	4		40585.6	2776.01	3			3.633		1493.8	366.814	4			3.633		36931.2	1126.25	2		29908.6	3137	2			3.633		1020.97	327.072	3
3.65		361.233	215.137	3		20277.7	1053.31	4		40456	2715.49	3			3.65		1493.3	362.464	4			3.65		36971	1107.4	2		29818.9	3257	2			3.65		859.533	367.979	3
3.667		393.533	250.996	3		20411.5	1039.46	4		40563.5	2771.33	3			3.667		1460.35	356.621	4			3.667		36856.2	1109.25	2		29882.1	3341.4	2			3.667		874.067	410.647	3
3.683		389.967	238.944	3		20626.5	1070.76	4		40497.8	2822.89	3			3.683		1400.62	352.865	4			3.683		36886.3	1173.7	2		29844.8	3292.35	2			3.683		945.767	374.808	3
3.7		349.633	217.58	3		20751.4	1067.22	4		40488.5	2925.2	3			3.7		1444.83	372.107	4			3.7		36886.9	1156.95	2		29857.7	3153.65	2			3.7		887.433	380.631	3
3.717		372	230.481	3		20928	1118.63	4		40461.6	2781.03	3			3.717		1541.9	366.038	4			3.717		36906.4	1177.45	2		29833.7	3111	2			3.717		935.933	343.503	3
3.733		378.367	233.909	3		21138.8	1074.7	4		40382.1	2732.35	3			3.733		1478.67	355.464	4			3.733		36808.4	1155.4	2		29812.7	3202.65	2			3.733		889.233	325.976	3
3.75		388.467	233.258	3		21278.9	1101.03	4		40376.9	2738.64	3			3.75		1725.2	368.167	4			3.75		36808.8	1161.05	2		29759.2	3167.65	2			3.75		1007.97	324.977	3
3.767		376.367	226.721	3		21467.9	1122.44	4		40390.8	2821.44	3			3.767		1541.6	354.471	4			3.767		36928	1191.7	2		29872.8	3148.85	2			3.767		876.867	353.338	3
3.783		362.433	216.008	3		21576.2	1126.93	4		40357.3	2864.02	3			3.783		1498.08	351.095	4			3.783		36888.2	1049.05	2		29710.9	3080.2	2			3.783		834	315.424	3
3.8		363	221.705	3		21795.3	1108.2	4		40379.6	2786.24	3			3.8		1537.97	355.537	4			3.8		36903.3	1081.35	2		29849	3177.35	2			3.8		941.633	298.39	3
3.817		368.1	221.874	3		22044.6	1122.18	4		40271.7	2778.13	3			3.817		1391.97	366.565	4			3.817		36868.4	1181.2	2		29771.5	3186.8	2			3.817		988.867	378.251	3
3.833		357	215.895	3		22127.6	1164.18	4		40462.4	2867.45	3			3.833		1471.53	349.791	4			3.833		36898.4	1100.15	2		29823.8	3162.85	2			3.833		902.2	388.609	3
3.85		343.5	201.346	3		22359	1161.58	4		40428.5	2795.67	3			3.85		1587.12	352.965	4			3.85		36849	1126.6	2		29762.1	3145.3	2			3.85		814.133	322.688	3
3.867		368.3	227.147	3		22577.2	1211.92	4		40424.4	2791.88	3			3.867		1527.58	354.345	4			3.867		36903.3	1037	2		29752.2	3241.25	2			3.867		856.6	290.513	3
3.883		374.733	225.59	3		22780.6	1201.5	4		40342.2	2852.16	3			3.883		1560.83	355.157	4			3.883		36885.3	1097.2	2		29688	2992.25	2			3.883		835.5	291.2	3
3.9		384.167	221.495	3		22883.2	1233.12	4		40366.7	2809.54	3			3.9		1606.62	395.586	4			3.9		36833.2	1060.7	2		29739.8	3108.05	2			3.9		876.567	359.261	3
3.917		376.1	228.462	3		23113.4	1233.82	4		40365.8	2778.97	3			3.917		1422.1	351.022	4			3.917		36873.2	1022.75	2		29698.2	3245.25	2			3.917		859.867	369.563	3
3.933		383.833	252.154	3		23317.5	1260.21	4		40437.2	2805.98	3			3.933		1631.4	364.749	4			3.933		36817.4	1025.15	2		29789.7	3314.55	2			3.933		941.7	386.179	3
3.95		371.4	221.069	3		23504	1260.7	4		40415.5	2837.03	3			3.95		1650.25	381.246	4			3.95		36795.1	1085.7	2		29667.6	3035	2			3.95		920.267	395.221	3
3.967		383.133	254.328	3		23663.8	1262.58	4		40441.7	2783.29	3			3.967		1547.38	379.223	4			3.967		36759.2	1087.95	2		29578.7	3122.95	2			3.967		906.367	293.807	3
3.983		379.133	245.871	3		23870	1271.07	4		40465.8	2790.03	3			3.983		1589.17	368.535	4			3.983		36809.6	1098.05	2		29698.7	3225.85	2			3.983		783.433	357.361	3
4		368.933	218.736	3		24078.9	1311.16	4		40426.2	2854.42	3			4		1507.38	374.896	4			4		36691.6	1187.45	2		29655.3	3178.45	2			4		876.667	382.442	3
4.017		371.5	222.654	3		24241.2	1382.74	4		40524	2801.17	3			4.017		1533.88	355.509	4			4.017		36749.4	1119.1	2		29673	3243.95	2			4.017		915.4	380.396	3
4.033		367.5	220.64	3		24473.5	1358.06	4		40509.7	2813.2	3			4.033		1687.85	370.359	4			4.033		36748.2	1194.95	2		29669	3176.3	2			4.033		921.733	344.771	3
4.05		379.433	223.908	3		24699.2	1318.73	4		40421.6	2744.33	3			4.05		1514.25	361.572	4			4.05		36711.9	1147.3	2		29667.5	3267.5	2			4.05		890.667	363.69	3
4.067		355.267	205.965	3		24814.7	1424.99	4		40470.1	2813.59	3			4.067		1717.25	387.626	4			4.067		36662.4	1107.75	2		29759.7	3120.05	2			4.067		880.7	310.427	3
4.083		370.767	233.25	3		25026.2	1427.92	4		40478.7	2870.14	3			4.083		1727.95	371.487	4			4.083		36624.8	1061.95	2		29694	3183.45	2			4.083		886.233	280.019	3
4.1		385.767	226.553	3		25262.4	1440.76	4		40501.2	2827.03	3			4.1		1605.5	362.094	4			4.1		36658	987.8	2		29703.8	3145.8	2			4.1		828.367	351.699	3
4.117		372.633	217.129	3		25409.3	1423.8	4		40487.1	2823.93	3			4.117		1641.35	358.994	4			4.117		36696.1	1046.6	2		29680.5	3237.3	2			4.117		799.567	380.91	3
4.133		381.2	242.909	3		25626.3	1461.96	4		40534	2873.56	3			4.133		1539.58	358.504	4			4.133		36722.3	1025	2		29715.2	3206.3	2			4.133		821.4	315.689	3
4.15		361.9	224.425	3		25876.7	1476.48	4		40496.3	2855.48	3			4.15		1534.47	358.502	4			4.15		36740.2	1051.65	2		29571.5	3341.25	2			4.15		845.567	378.613	3
4.167		385.6	235.08	3		26051.1	1524.2	4		40436.1	2817.97	3			4.167		1566.92	358.939	4			4.167		36703.4	1020.2	2		29799.2	3277.75	2			4.167		829.733	389.009	3
4.183		382.333	225.561	3		26229.5	1543.8	4		40506.9	2851.94	3			4.183		1542.72	359.027	4			4.183		36733.3	949.25	2		29633.2	3141.65	2			4.183		955.933	330.743	3
4.2		391.7	231.878	3		26436.2	1575.56	4		40481.6	2830.09	3			4.2		1752.28	369.226	4			4.2		36607.4	985.4	2		29590.7	3146.55	2			4.2		850.933	341.535	3
4.217		366.533	212.039	3		26707.3	1628	4		40497.1	2816.33	3			4.217		1496.3	353.676	4			4.217		36650.4	980.4	2		29625.7	3080.45	2			4.217		804.933	306.18	3
4.233		389.6	243.841	3		26875.5	1619.34	4		40318.4	2790.85	3			4.233		1592.92	365.676	4			4.233		36671.4	990.45	2		29675.4	3172.2	2			4.233		743	347.339	3
4.25		373.433	229.591	3		27108.6	1644.31	4		40381.9	2753.46	3			4.25		1532.7	355.614	4			4.25		36591.2	953.05	2		29740.7	3250.35	2			4.25		892.633	305.785	3
4.267		393.3	234.522	3		27318.5	1698.06	4		40481.2	2838.37	3			4.267		1577.92	358.142	4			4.267		36522.9	1102.5	2		29543.4	3163.4	2			4.267		832.933	307.12	3
4.283		411.233	259.445	3		27500.1	1718.78	4		40487	2861.67	3			4.283		1541.75	355.63	4			4.283		36645.7	1035.45	2		29590	3159.85	2			4.283		842.633	341.24	3
4.3		399.067	239.188	3		27749.3	1735.02	4		40507.2	2830.09	3			4.3		1575.22	356.483	4			4.3		36581.1	1082.05	2		29646.7	3257.75	2			4.3		857.033	379.756	3
4.317		403.733	254.191	3		27971.7	1787.32	4		40553.5	2866.12	3			4.317		1713.45	365.661	4			4.317		36525.4	1108.45	2		29669.8	3247.55	2			4.317		902.433	330.34	3
4.333		359.8	208.454	3		28061.7	1806.08	4		40471.7	2821.51	3			4.333		1634.17	415.891	4			4.333		36444.7	1154.25	2		29698	3228.3	2			4.333		815.733	291.521	3
4.35		405.567	247.4	3		28339.8	1832.69	4		40446.1	2849.36	3			4.35		1634.47	360.57	4			4.35		36547.6	1128.6	2		29585	3173.8	2			4.35		753.867	270.885	3
4.367		370.633	209.193	3		28681.9	1859.26	4		40497	2868.37	3			4.367		1680.53	361.706	4			4.367		36596.2	1085.65	2		29590.1	3183.5	2			4.367		779.633	323.306	3
4.383		377.4	225.415	3		28864.2	1890.81	4		40426.2	2772.99	3			4.383		1635.8	364.004	4			4.383		36525.9	1142.75	2		29644.4	3216.8	2			4.383		876.133	271.599	3
4.4		375.867	223.014	3		29011.3	1920.34	4		40406.4	2786.63	3			4.4		1479.45	355.661	4			4.4		36530.5	1160.3	2		29685.8	3205.3	2			4.4		825.567	327.548	3
4.417		405.6	244.238	3		29238.2	1944.26	4		40560.7	2830.91	3			4.417		1680.6	364.974	4			4.417		36532.9	1126.15	2		29681.5	3217.5	2			4.417		902.167	318.84	3
4.433		396.633	237.065	3		29483.6	1963.18	4		40422.6	2784.07	3			4.433		1636.33	361.956	4			4.433		36566.2	1047.45	2		29585.7	3131.15	2			4.433		923.833	275.75	3
4.45		378.633	221.206	3		29604.6	2006.56	4		40496.4	2824.05	3			4.45		1854.83	397.17	4			4.45		36561.9	1011.15	2		29597.3	3180.5	2			4.45		761.367	311.616	3
4.467		377.733	231.462	3		29897.8	2025.73	4		40343.6	2803.91	3			4.467		1730.2	364.016	4			4.467		36506.8	1121.1	2		29587.9	3249.7	2			4.467		851.467	281.003	3
4.483		373.167	223.128	3		30045.8	2095.09	4		40383.7	2811.23	3			4.483		1631.58	369.045	4			4.483		36408.4	988.05	2		29544.1	3261.6	2			4.483		796.7	349.289	3
4.5		426.067	274.644	3		30214.5	2101.55	4		40431.1	2836.85	3			4.5		1515.92	397.184	4			4.5		36422.7	1135	2		29582	3180.05	2			4.5		761.667	358.023	3
4.517		392.367	236.43	3		30445.4	2142.67	4		40374.3	2758.03	3			4.517		1549.1	376.183	4			4.517		36466.2	1064.25	2		29561.4	3190.8	2			4.517		849.733	345.877	3
4.533		422.733	264.592	3		30565.4	2168.26	4		40501	2816.14	3			4.533		1667.75	361.814	4			4.533		36509.6	1134.5	2		29630.8	3131.85	2			4.533		879.6	363.711	3
4.55		381.8	228.595	3		30861.8	2198.19	4		40511.8	2823.01	3			4.55		1601.6	366.894	4			4.55		36476	946	2		29503.8	3114.35	2			4.55		867.6	380.177	3
4.567		412.8	256.997	3		31054.2	2188.66	4		40478.6	2791.29	3			4.567		1548.1	369.751	4			4.567		36429.1	956.9	2		29449.8	3141.65	2			4.567		835.867	290.402	3
4.583		390.567	241.167	3		31155.6	2243	4		40502.2	2812.57	3			4.583		1646.5	377.036	4			4.583		36428.7	938.25	2		29575.2	3194.15	2			4.583		787.5	264.417	3
4.6		398.467	234.221	3		31309	2277.77	4		40422.5	2826.4	3			4.6		1583.4	362.401	4			4.6		36252.8	987.05	2		29503.4	3170.3	2			4.6		814.967	340.341	3
4.617		391.733	226.156	3		31611.3	2287.44	4		40384.2	2803	3			4.617		1715.5	367.329	4			4.617		36419.2	1040.25	2		29550.8	3178.35	2			4.617		858.9	298.723	3
4.633		395.3	236.859	3		31751.8	2269.06	4		40456.1	2823.51	3			4.633		1818.15	363.118	4			4.633		36398	1006.3	2		29534.3	3166.95	2			4.633		793.4	343.4	3
4.65		393.8	250.025	3		31853.6	2299.5	4		40440.9	2853.87	3			4.65		1717.72	360.955	4			4.65		36412.3	1142.95	2		29519.5	3209.5	2			4.65		929.1	323.955	3
4.667		396.9	239.084	3		32121.8	2295.28	4		40455.8	2851.76	3			4.667		1636.72	363.07	4			4.667		36336.7	1042.05	2		29479.3	3201.25	2			4.667		881.567	373.573	3
4.683		398.567	250.556	3		32247.6	2302.54	4		40460.9	2789	3			4.683		1612.97	367.038	4			4.683		36405.6	1055.1	2		29431.2	3263.5	2			4.683		905.467	349.549	3
4.7		409.2	238.083	3		32437.1	2349.64	4		40428.5	2868.86	3			4.7		1673.58	375.666	4			4.7		36409.2	1016.6	2		29519.5	3265.35	2			4.7		891.267	342.755	3
4.717		389.7	222.172	3		32620.7	2327.43	4		40336.2	2733.29	3			4.717		1776.05	373.485	4			4.717		36382.3	1105.8	2		29516.8	3240.7	2			4.717		767.9	359.223	3
4.733		429.4	266.543	3		32675	2341.66	4		40469	2839.56	3			4.733		1801.42	379.274	4			4.733		36392.2	1060.75	2		29326.5	3120.75	2			4.733		820.8	240.813	3
4.75		395.667	244.501	3		32917.2	2368.32	4		40469	2822.04	3			4.75		1748.4	370.219	4			4.75		36253.6	1025.25	2		29432.6	3234.5	2			4.75		767.033	291.915	3
4.767		389.2	230.826	3		33072.8	2350.2	4		40489.3	2888.29	3			4.767		1709.65	365.596	4			4.767		36444.9	1006	2		29342	3095.65	2			4.767		777.967	350.974	3
4.783		384.667	234.408	3		33446.7	2441.03	4							4.783		1620.92	367.981	4			4.783		36352.6	987.15	2		29369	3222.1	2			4.783		797.3	372.394	3
4.8		389.7	235.786	3		33562	2483.43	4							4.8		1817.08	369.596	4			4.8		36454.2	1022.95	2		29380.7	3035.2	2			4.8		793.933	398.39	3
4.817		386.9	226.13	3		33653.8	2466.76	4							4.817		1787.75	368.462	4			4.817		36393.2	914.35	2		29494.5	3149.1	2			4.817		739.333	360.213	3
4.833		401.8	239.42	3		33882.2	2459.11	4							4.833		1647.28	368.526	4			4.833		36288.9	973.55	2		29431.3	3150.4	2			4.833		870.1	229.157	3
4.85		392.867	222.408	3		34012.3	2442.24	4							4.85		1739.12	363.431	4			4.85		36340.4	994.85	2		29340.3	3228.25	2			4.85		727.633	273.607	3
4.867		389.833	230.212	3		34162.9	2426.93	4							4.867		1816.17	365.698	4			4.867		36333.4	952.9	2		29389.2	3299.25	2			4.867		763.533	276.477	3
4.883		415.033	250.465	3		34257.6	2371.44	4							4.883		1667.33	360.824	4			4.883		36284.6	928.55	2		29441.7	3140.5	2			4.883		779.067	322.865	3
4.9		419.3	270.362	3		34365.4	2363.5	4							4.9		1791.97	369.483	4			4.9		36267.3	891.5	2		29453.7	3170.05	2			4.9		795.633	281.832	3
4.917		393.167	232.75	3		34331.1	2381.99	4							4.917		1754.5	364.042	4			4.917		36188	828.2	2		29316	3230.45	2			4.917		855.267	344.326	3
4.933		386.633	226.731	3		34684	2379.93	4							4.933		1896.42	379.002	4			4.933		36137.8	932.15	2		29363.8	3280.55	2			4.933		832.333	358.468	3
4.95		400.267	235.773	3		34752.6	2362.74	4							4.95		1585.42	369.865	4			4.95		36171.8	1006.95	2		29391.5	3111	2			4.95		825.5	305.389	3
4.967		395.433	233.042	3		34884.7	2346.69	4							4.967		1725.85	371.664	4			4.967		36214.6	932.25	2		29282.2	3176.55	2			4.967		795.533	316.331	3
4.983		378.933	217.675	3		35014.8	2294.53	4							4.983		1736.15	375.415	4			4.983		36208.1	982.15	2		29362.8	3245.05	2			4.983		732.533	294.832	3
5		392.233	231.116	3		35146.4	2369.9	4							5		1783.58	377.092	4			5		36172.3	1000.75	2		29381	3115.95	2			5		754.167	276.451	3
5.017		426.267	254.755	3		35222.4	2305.81	4							5.017		1795.65	369.654	4			5.017		36218.7	959.7	2		29345.5	3218.9	2			5.017		801	328.989	3
5.033		370	226.498	3		35235	2284.52	4							5.033		1906.05	376.228	4			5.033		36215.2	967.05	2		29336	3196.85	2			5.033		771.967	266.396	3
5.05		402.4	237.401	3		35371.8	2250.49	4							5.05		1572.6	376.155	4			5.05		36169.1	875.2	2		29353	3239.65	2			5.05		861.6	231.063	3
5.067		389.2	226.465	3		35550.4	2242.35	4							5.067		1866.1	371.925	4			5.067		36153.6	867.65	2		29457.9	3180	2			5.067		843.767	200.882	3
5.083		417.5	261.83	3		35701.8	2200.32	4							5.083		1860.33	373.857	4			5.083		36244.8	914.95	2		29376	3163.45	2			5.083		730	248.433	3
5.1		404.1	240.296	3		35821.3	2158.03	4							5.1		1886.25	375.547	4			5.1		36201.1	940.45	2		29361.2	3175.1	2			5.1		843.533	295.753	3
5.117		419.267	262.673	3		35964.2	2170.95	4							5.117		1628.42	376.147	4			5.117		36188	959.1	2		29361.7	3225.8	2			5.117		840.433	291.362	3
5.133		417.567	248.914	3		36069.1	2154.69	4							5.133		1765.8	385.95	4			5.133		36177.8	934.35	2		29322.5	3288.1	2			5.133		801.567	265.456	3
5.15		414.2	238.522	3		36155.1	2138.29	4							5.15		1751.22	377.209	4			5.15		36094.3	918.3	2		29269.4	3179.2	2			5.15		848.733	288.548	3
5.167		389.267	232.715	3		36186.1	2136.87	4							5.167		1781.17	374.636	4			5.167		36174.3	915.9	2		29253.8	3242.45	2			5.167		760.933	329.435	3
5.183		402.333	223.981	3		36475.2	2117.28	4							5.183		1692.8	375.07	4			5.183		36211	936.3	2		29283.1	3240	2			5.183		826.067	309.402	3
5.2		411.4	234.822	3		36432.8	2044.02	4							5.2		1864	379.664	4			5.2		36193	903.8	2		29266.5	3062.75	2			5.2		803.3	302.225	3
5.217		403.267	238.691	3		36664.8	2031.35	4							5.217		1599.12	380.752	4			5.217		36110.9	918.85	2		29161.5	3143.55	2			5.217		645.067	308.545	3
5.233		408.9	245.428	3		36658.7	2035.3	4							5.233		1718.17	372.197	4			5.233		36137.8	886.05	2		29313.9	3150	2			5.233		738.633	265.941	3
5.25		408.767	252.972	3		36862.4	1994.31	4							5.25		1851.78	384.165	4			5.25		36104.6	960.6	2		29369.5	3169.05	2			5.25		604.433	363.021	3
5.267		384.333	221.048	3		36836.5	2003.36	4							5.267		1862.97	379.189	4			5.267		36070.4	934.5	2		29277.4	3288.3	2			5.267		689.133	316.193	3
5.283		408.267	245.205	3		36965	1960.15	4							5.283		1686.45	370.486	4			5.283		36156.9	911.15	2		29427.4	3307.7	2			5.283		802.333	262.171	3
5.3		419.933	269.466	3		37148.7	1941.33	4							5.3		1674.95	379.834	4			5.3		36105.7	968.45	2		29283.2	3272.2	2			5.3		728.733	352.566	3
5.317		407.2	239.597	3		37098.8	1906.9	4							5.317		1798.95	374.195	4			5.317		36101.2	931.05	2		29306.2	3320.55	2			5.317		790.467	359.681	3
5.333		425.8	262.398	3		37301.3	1922.23	4							5.333		1894.83	376.907	4			5.333		36045.1	869.55	2		29279.7	3073.2	2			5.333		901.567	371.34	3
5.35		411.333	240.852	3		37404.3	1864.22	4							5.35		1932.53	402.712	4			5.35		36099.2	942.55	2		29248.2	3216.4	2			5.35		776.867	375.826	3
5.367		437.533	267.61	3		37481.6	1881.65	4							5.367		1776.22	387.868	4			5.367		36062.2	950.9	2		29290.5	3298.65	2			5.367		784.433	316.146	3
5.383		436.933	286.85	3		37497.3	1858.72	4							5.383		1782.53	384.695	4			5.383		36110.5	990.9	2		29286.9	3318.9	2			5.383		762.1	350.944	3
5.4		371.9	212.978	3		37685.3	1787.71	4							5.4		1751.47	373.057	4			5.4		36102.9	931.8	2		29199.2	3205.95	2			5.4		801.733	304.804	3
5.417		393.9	231.327	3		37722.6	1793.14	4							5.417		1969.75	381.007	4			5.417		36172.8	923.75	2		29213.4	3241.9	2			5.417		732.533	375.6	3
5.433		438.7	269.134	3		37892.3	1779.71	4							5.433		1905.2	412.63	4			5.433		36100.6	1013.7	2		29271.5	3285.05	2			5.433		763.5	331.693	3
5.45		431.1	274.88	3		38043.6	1729.12	4							5.45		1811.4	416.96	4			5.45		36104.1	932.45	2		29195.8	3327.35	2			5.45		840.7	270.147	3
5.467		402.567	249.09	3		37994.8	1752.96	4							5.467		1770.28	401.942	4			5.467		36069.1	995.2	2		29274.3	3255.45	2			5.467		875.867	338.165	3
5.483		425.6	255.958	3		38137.8	1706.55	4							5.483		1891.28	383.595	4			5.483		36065.1	972.4	2		29260.4	3222.9	2			5.483		798.733	335.483	3
5.5		439.133	280.488	3		38286.6	1716.5	4							5.5		1795.33	374.778	4			5.5		36122.7	1031.25	2		29244.8	3238.35	2			5.5		746.167	331.557	3
5.517		408.667	241.862	3		38262.3	1596.41	4							5.517		1947.15	399.666	4			5.517		36017.2	899.75	2		29107	3290.7	2			5.517		742.867	259.977	3
5.533		432.467	274.855	3		38453.2	1622.65	4							5.533		1942.53	385.745	4			5.533		36026.7	978.6	2		29090.8	3209.45	2			5.533		741.2	218.002	3
5.55		401.433	232.212	3		38522.9	1627.09	4							5.55		1902.6	396.997	4			5.55		36008.3	885.75	2		29128.3	3217.4	2			5.55		663.233	254.177	3
5.567		414.533	256.663	3		38643.6	1574.56	4							5.567		1817.38	392.431	4			5.567		36027.1	932.8	2		29171.8	3203.55	2			5.567		734.233	202.253	3
5.583		429.167	266.9	3		38701.4	1577	4							5.583		1866.12	391.659	4			5.583		35860.6	1056.25	2		29265.5	3259.9	2			5.583		765.3	261.95	3
5.6		432.5	256.159	3		38722.6	1587.23	4							5.6		1737.12	385.94	4			5.6		35904.4	917.85	2		29240.4	3311.5	2			5.6		763.467	267.496	3
5.617		422.333	247.217	3		38742.1	1586.37	4							5.617		1873.22	387.253	4			5.617		35892.2	979.25	2		29197.7	3332.85	2			5.617		774.033	266.099	3
5.633		427.867	257.326	3		38897.1	1523.6	4							5.633		1849.75	396.93	4			5.633		36005.8	973.55	2		29134.3	3302.8	2			5.633		725.4	246.93	3
5.65		427.667	273.013	3		38886.6	1532.3	4							5.65		2012.67	413.498	4			5.65		35954.6	953.15	2		29259.6	3328.7	2			5.65		763.867	272.447	3
5.667		398.3	234.39	3		38959.6	1538.63	4							5.667		1810.47	392.868	4			5.667		35924.8	983.1	2		29214	3337.35	2			5.667		835.767	255.162	3
5.683		439.467	276.023	3		39041.9	1560.05	4							5.683		1872.83	384.645	4			5.683		35943.8	903.75	2		29104.4	3219.9	2			5.683		749.1	296.021	3
5.7		404.1	252.118	3		39090.4	1484.77	4							5.7		1958.2	390.004	4			5.7		35972.9	958.6	2		29184.8	3337.35	2			5.7		660.167	282.413	3
5.717		426.7	266.167	3		39169.1	1483.88	4							5.717		1886.22	384.23	4			5.717		35922.8	980.8	2		29189	3322.75	2			5.717		741.6	268.604	3
5.733		399.2	227.792	3		39161.3	1412.99	4							5.733		1983.17	390.331	4			5.733		35914.9	911.15	2		29046.9	3233.2	2			5.733		705.333	257.16	3
5.75		442.433	277.297	3		39306.4	1403.25	4							5.75		1888.9	390.258	4			5.75		35959.8	923.75	2		29072.5	3371.45	2			5.75		714.3	276.94	3
5.767		415.8	253.796	3		39343	1409.27	4							5.767		1786.38	381.345	4			5.767		35981.6	906.85	2		29091.2	3256.65	2			5.767		751.5	335.527	3
5.783		409.633	250.516	3		39295.6	1437.32	4							5.783		1953.22	394.42	4			5.783		35982.7	908.35	2		29094	3206.55	2			5.783		755.033	316.489	3
5.8		412.3	245.997	3		39479.7	1373.44	4							5.8		1977.12	393.78	4			5.8		35917.3	867.05	2		29136.8	3237.3	2			5.8		710.467	223.786	3
5.817		434.867	258.983	3		39492.7	1352.5	4							5.817		1950.6	392.437	4			5.817		35913.9	895.85	2		29089	3251.65	2			5.817		706.567	285.105	3
5.833		412.267	250.434	3		39549.8	1348.03	4							5.833		1915.42	388.444	4			5.833		35943.2	877.85	2		29048.3	3340.9	2			5.833		715.733	349.931	3
5.85		426.033	258.639	3		39613.8	1355.2	4							5.85		1970.6	388.617	4			5.85		35846.1	830.7	2		29138.1	3265.8	2			5.85		788.467	331.484	3
5.867		426.2	261.227	3		39686.7	1318.81	4							5.867		1867.35	384.773	4			5.867		35825.7	861.9	2		29120.3	3346.6	2			5.867		674.933	363.196	3
5.883		424.533	256.055	3		39667.4	1339.64	4							5.883		2063.2	390.166	4			5.883		35808.6	894.6	2		29089	3407.25	2			5.883		870.133	284.893	3
5.9		402.167	240.89	3		39747.7	1334.69	4							5.9		1868.83	380.104	4			5.9		35872.1	869.15	2		29134.8	3313.8	2			5.9		783.833	286.235	3
5.917		395.167	221.438	3		39856.7	1299.91	4							5.917		1865.62	393.546	4			5.917		35852.6	890.65	2		29160.5	3308.05	2			5.917		743.667	367.434	3
5.933		413.6	256.473	3		39819.6	1262.73	4							5.933		1918.75	383.93	4			5.933		35771.6	1009.75	2		29074.7	3313.1	2			5.933		786.4	347.14	3
5.95		384	224.045	3		39855.4	1224.95	4							5.95		1969.92	387.132	4			5.95		35738.7	889.05	2		29063	3346.95	2			5.95		726.9	264.63	3
5.967		424.1	264.39	3		39938.3	1305.15	4							5.967		1806.3	380.434	4			5.967		35821.8	941.95	2		29091.5	3366.75	2			5.967		782.867	281.763	3
5.983		385.333	221.896	3		39975.2	1283	4							5.983		1950.47	400.355	4			5.983		35859.6	882.95	2		29046.2	3290.85	2			5.983		812.267	327.273	3
6		412.367	239.586	3		40035.9	1274.54	4							6		1888.65	387.446	4			6		35831.9	887.65	2		29072.5	3241.9	2			6		667.933	305.927	3
6.017		397.433	231.198	3		40040.4	1216.89	4							6.017		1856.28	385.373	4			6.017		35755.5	878	2		29090.2	3317.9	2			6.017		675.5	241.801	3
6.033		402.333	238	3		40125.8	1191.59	4							6.033		1999.6	387.742	4			6.033		35811.6	886.75	2		29151.9	3380.4	2			6.033		701.867	332.213	3
6.05		422.833	236.297	3		40162.9	1155.32	4							6.05		1846.47	388.528	4			6.05		35755.3	854.85	2		29005.7	3337.85	2			6.05		723.233	250.608	3
6.067		415.567	241.011	3		40104.2	1179.2	4							6.067		1823.47	379.874	4			6.067		35761.1	857.8	2		29005.6	3190.9	2			6.067		631.833	235.392	3
6.083		427.033	249.708	3		40153.1	1168.63	4							6.083		1825	399.547	4			6.083		35722.4	849.6	2		29042	3259.9	2			6.083		670.433	250.843	3
6.1		391.067	226.122	3		40161.2	1131.69	4							6.1		1844.88	381.924	4			6.1		35766.6	856.8	2		28961.7	3143.7	2			6.1		677.333	284.862	3
6.117		402.833	239.427	3		40270.5	1152.58	4							6.117		1986.28	392.479	4			6.117		35763.6	808.4	2		29087	3213.35	2			6.117		743.3	257.717	3
6.133		429.767	254.412	3		40397.3	1113.93	4							6.133		2016	399.044	4			6.133		35696.4	803.55	2		29018.4	3313.7	2			6.133		695.167	217.753	3
6.15		410.8	236.761	3		40371	1060.09	4							6.15		1953.35	395.162	4			6.15		35646.6	829.9	2		28944.2	3218.45	2			6.15		762.933	253.994	3
6.167		420.067	243.516	3		40514.8	1137.92	4							6.167		1793.95	382.171	4			6.167		35692.9	792.15	2		28950.8	3224.55	2			6.167		778.867	270.52	3
6.183		412.8	266.278	3		40457	1086.32	4							6.183		1898.53	403.396	4			6.183		35555.5	739.3	2		28898.8	3261.05	2			6.183		698.833	278.849	3
6.2		446.3	279.846	3		40552.6	1102.14	4							6.2		1905.92	385.593	4			6.2		35631.2	781.25	2		28984.8	3343.25	2			6.2		769.667	280.67	3
6.217		423.3	266.138	3		40610.7	1080.63	4							6.217		1937.4	387.284	4			6.217		35732.1	809.8	2		28918.8	3308.5	2			6.217		684.867	266.177	3
6.233		418.867	249.541	3		40570.8	1021.95	4							6.233		1825.38	383.57	4			6.233		35685.4	811.9	2		29023.8	3231.65	2			6.233		737.367	243.4	3
6.25		407.133	232.921	3		40549.6	1016.76	4							6.25		1887.62	407.658	4			6.25		35703.4	761.55	2		28930.7	3334.8	2			6.25		832.9	257.415	3
6.267		408.433	247.731	3		40646.3	1090.21	4							6.267		1920.88	395.676	4			6.267		35692.6	730.6	2		29027.3	3362.2	2			6.267		809.967	307.69	3
6.283		397.367	240.63	3		40551.1	1048.03	4							6.283		1945.53	385.992	4			6.283		35600.3	790.05	2		28915.3	3347.7	2			6.283		693.667	337.438	3
6.3		414.167	250.93	3		40758.6	1063.29	4							6.3		2053.7	388.669	4			6.3		35607.4	746.7	2		28956	3345.45	2			6.3		682.967	332.367	3
6.317		389.7	225.878	3		40678.7	1095.69	4							6.317		1913.42	388.94	4			6.317		35557.6	792.25	2		28974.8	3351.05	2			6.317		734.633	282.914	3
6.333		412.233	242.552	3		40723.2	1087.66	4							6.333		2082.65	393.553	4			6.333		35558.5	726.5	2		28916.8	3271.5	2			6.333		665.5	254.24	3
6.35		425.967	241.628	3		40821.1	1045.83	4							6.35		1907.9	383.138	4			6.35		35554.2	765.95	2		28918.6	3287.5	2			6.35		662	201.91	3
6.367		435.633	267.77	3		40733.2	1033.5	4							6.367		1918.33	389.876	4			6.367		35621.8	776.35	2		29008.2	3289.75	2			6.367		619.967	274.372	3
6.383		430.167	249.279	3		40749.5	1034.6	4							6.383		2040.78	411.157	4			6.383		35599.9	791.35	2		28989.7	3205.35	2			6.383		668.633	329.653	3
6.4		421.2	255.175	3		40741.1	1004.93	4							6.4		1985.12	389.872	4			6.4		35592.7	911.5	2		28845.7	3227.85	2			6.4		806.667	284.376	3
6.417		398.867	225.432	3		40846.8	971.347	4							6.417		2003.42	420.47	4			6.417		35670.4	839.35	2		28858	3201.35	2			6.417		696.2	272.441	3
6.433		418.2	251.9	3		40900.3	1008.26	4							6.433		1946.15	396.687	4			6.433		35635	757.1	2		28841.8	3285.5	2			6.433		725.7	215.876	3
6.45		427.633	262.428	3		41028	977.088	4							6.45		2175.8	399.087	4			6.45		35571.9	727.65	2		28868	3419.65	2			6.45		732.633	250.527	3
6.467		398	224.478	3		41018.7	974.991	4							6.467		2032.53	393.644	4			6.467		35445.5	761.4	2		28871.5	3229.3	2			6.467		828.4	296.545	3
6.483		401.3	231.177	3		40995.4	915.228	4							6.483		2104.6	395.278	4			6.483		35543.6	787.75	2		28839	3196.75	2			6.483		759.8	336.411	3
6.5		159.033	36.1456	3		40985.6	996.558	4							6.5		2131.9	393.024	4			6.5		35543.1	767.65	2		28867.5	3211.25	2			6.5		693.5	329.885	3
6.517		153.767	30.0208	3		40975.6	958.949	4							6.517		2223.7	406.838	4			6.517		35548	720.1	2		28859.8	3289.55	2			6.517		805.7	238.695	3
6.533		441.033	229.243	3		41080.3	934.738	4							6.533		2036.22	403.859	4			6.533		35573.3	786.15	2		28912.2	3268.55	2			6.533		671.967	287.229	3
6.55		446.1	213.917	3		41183.2	908.23	4							6.55		1951.65	421.846	4			6.55		35541.7	736.75	2		28847.7	3331.25	2			6.55		717.067	316.276	3
6.567		393.1	230.117	3		41149.5	892.761	4							6.567		2160.62	410.464	4			6.567		35479.4	778	2		28893.4	3239.1	2			6.567		837.4	228.54	3
6.583		416.433	234.431	3		41139.1	890.315	4							6.583		2210.88	401.144	4			6.583		35456.2	838.75	2		28897.3	3227.15	2			6.583		690.567	274.936	3
6.6		425.567	258.768	3		41153.9	908.544	4							6.6		2181.03	408.309	4			6.6		35410.7	794.8	2		28934.7	3224.75	2			6.6		724.7	260.24	3
6.617		413.5	232.806	3		41225.3	926.265	4							6.617		1943.15	398.066	4			6.617		35477.7	739.5	2		28945.8	3287.05	2			6.617		741.967	331.629	3
6.633		399.5	222.724	3		41097.4	901.44	4							6.633		2054.35	392.557	4			6.633		35495.9	730.45	2		28834.9	3138.7	2			6.633		759.7	348.478	3
6.65		406.4	241.551	3		41243.2	918.114	4							6.65		2141.32	404.825	4			6.65		35387.7	790.2	2		28944.6	3253.7	2			6.65		781.3	309.8	3
6.667		416.167	235.923	3		41322.3	848.32	4							6.667		2077.97	405.734	4			6.667		35376	796.5	2		28934.8	3176.1	2			6.667		797.833	249.218	3
6.683		372.867	204.816	3		41167.7	893.448	4							6.683		1934.55	403.435	4			6.683		35399.2	732.75	2		28827.4	3130.2	2			6.683		682.633	246.674	3
6.7		448.433	273.178	3		41134.5	848.423	4							6.7		2118.5	404.507	4			6.7		35433.9	777.9	2		28805.9	3291.2	2			6.7		651.267	257.713	3
6.717		400.633	231.071	3		41297.5	845.05	4							6.717		2142.72	400.3	4			6.717		35382.3	705.3	2		28775.4	3238.3	2			6.717		660.233	270.322	3
6.733		386.833	214.818	3		41290.2	888.502	4							6.733		2172.65	392.375	4			6.733		35486.3	732.65	2		28888.2	3266.95	2			6.733		667.9	291.107	3
6.75		425.5	247.467	3		41282.3	834.397	4							6.75		2023.15	399.214	4			6.75		35396.4	803.55	2		28944.2	3261.35	2			6.75		672.8	254.991	3
6.767		402.233	217.453	3		41252.2	849.298	4							6.767		2207.6	410.194	4			6.767		35428.8	845.05	2		28756	3223.4	2			6.767		681.133	248.986	3
6.783		403.567	226.996	3		41469.1	804.283	4							6.783		2058.65	388.37	4			6.783		35455.7	774.7	2		28847.2	3280.25	2			6.783		726.633	322.336	3
6.8		432.733	250.506	3		41340.5	903.393	4							6.8		2186.72	397.186	4			6.8		35387.9	805.95	2		28665.9	3389.8	2			6.8		788.2	327.669	3
6.817		418.167	234.824	3		41516.8	814.549	4							6.817		2002	402.709	4			6.817		35413.4	757.8	2		28775.5	3262.9	2			6.817		774.967	251.858	3
6.833		391.833	222.024	3		41439.8	829.146	4							6.833		2140.4	411.103	4			6.833		35329.6	690.7	2		28734.9	3327.6	2			6.833		639.967	253.218	3
6.85		423.7	257.37	3		41499.2	859.93	4							6.85		2138.57	412.374	4			6.85		35326.7	796.55	2		28911.9	3432	2			6.85		709.1	219.862	3
6.867		419	241.787	3		41551.9	837.355	4							6.867		1995.78	394.752	4			6.867		35355.7	685.95	2		28798.3	3277.4	2			6.867		760	218.921	3
6.883		426.8	249.786	3		41534.3	853.597	4							6.883		2065.57	395.217	4			6.883		35414.7	726.5	2		28758.8	3348	2			6.883		634.3	326.808	3
6.9		437.4	260.449	3		41598.9	816.819	4							6.9		2056.43	393.201	4			6.9		35239.8	713.15	2		28895.3	3292.65	2			6.9		665.233	376.916	3
6.917		403.667	244.642	3		41582.3	758.191	4							6.917		1855.4	391.106	4			6.917		35282.7	665.75	2		28803.8	3332.15	2			6.917		656.067	290.385	3
6.933		415.9	247.082	3		41578.6	879.825	4							6.933		2033.4	398.577	4			6.933		35337.8	758.85	2		28850.2	3270.95	2			6.933		732	228.173	3
6.95		418.767	233.482	3		41552.2	843.43	4							6.95		2165.85	403.249	4			6.95		35350.7	748.35	2		28856.7	3327.8	2			6.95		612.3	292.416	3
6.967		405.667	231.775	3		41575.2	822.236	4							6.967		2139.32	393.926	4			6.967		35337	759.9	2		28804.2	3271.35	2			6.967		747.967	272.421	3
6.983		439	260.531	3		41717.5	805.348	4							6.983		2172.88	397.007	4			6.983		35347.8	698.3	2		28779.5	3308.55	2			6.983		749	322.713	3
7		414.733	225.834	3		41621.4	806.172	4							7		2185.18	405.587	4			7		35238.8	690.05	2		28705.3	3244.8	2			7		695.067	316.89	3
7.017		385.7	232.487	3		41544.5	793.148	4							7.017		2070.15	391.222	4			7.017		35323.7	759.15	2		28786.4	3344.1	2			7.017		646.967	286.215	3
7.033		370.6	206.567	3		41607.2	746.476	4							7.033		2089.2	403.103	4			7.033		35361	761.9	2		28777.2	3310.35	2			7.033		636.2	307.856	3
7.05		411.333	244.304	3		41513.8	762.853	4							7.05		1975.33	390.268	4			7.05		35342.4	730.75	2		28747.8	3273.05	2			7.05		587.367	284.763	3
7.067		443.2	270.955	3		41589.8	818.89	4							7.067		2066.1	392.707	4			7.067		35340.8	705.55	2		28815.6	3282	2			7.067		662.433	230.39	3
7.083		427.6	251.944	3		41492.3	788.639	4							7.083		2063.97	417.456	4			7.083		35286.7	673.05	2		28787.2	3248.75	2			7.083		668.5	298.663	3
7.1		414.267	254.781	3		41708	792.367	4							7.1		1976.97	393.052	4			7.1		35356.2	772.9	2		28748.8	3346.85	2			7.1		702.9	282.347	3
7.117		427.7	247.271	3		41685.5	798.755	4							7.117		2100.35	394.075	4			7.117		35262.8	733	2		28598.1	3180.5	2			7.117		676.433	291.112	3
7.133		414.067	229.622	3		41789.7	782.828	4							7.133		2207.3	402.64	4			7.133		35266.2	716.05	2		28732.1	3298.3	2			7.133		706.1	307.158	3
7.15		412.867	247.256	3		41620.6	756.866	4							7.15		2225.8	414.631	4			7.15		35290.1	734.3	2		28712.2	3327.4	2			7.15		727.4	250.035	3
7.167		408.833	233.678	3		41679.1	764.462	4							7.167		2107.62	416.594	4			7.167		35382.6	744.5	2		28797.2	3270.95	2			7.167		643.867	210.451	3
7.183		435.8	254.151	3		41540.1	781.232	4							7.183		2261.05	403.912	4			7.183		35202.8	795.05	2		28762.5	3236.1	2			7.183		532.567	253.383	3
7.2		409.867	222.531	3		41656.8	712.75	4							7.2		2128.05	433.345	4			7.2		35264.8	740.8	2		28724.8	3290.75	2			7.2		583.067	264.186	3
7.217		412.167	228.153	3		41665.9	734.884	4							7.217		1969.6	403.599	4			7.217		35252.9	714.35	2		28687.7	3286.45	2			7.217		678.667	249.593	3
7.233		407.867	236.862	3		41692.2	742.108	4							7.233		2089.6	399.155	4			7.233		35161.7	840.15	2		28715.5	3273.85	2			7.233		739.1	230.054	3
7.25		413.767	229.673	3		41694.7	663.937	4							7.25		2330.75	409.597	4			7.25		35120.8	604.8	2		28658.2	3322.6	2			7.25		688.467	209.179	3
7.267		425.2	240.671	3		41674.3	705.476	4							7.267		2210.95	412.187	4			7.267		35255.2	737.1	2		28766.8	3277.15	2			7.267		696.3	271.684	3
7.283		418.433	236	3		41769.2	682.209	4							7.283		2071.22	399.136	4			7.283		35285.4	731.75	2		28703.9	3192.2	2			7.283		695.867	299.003	3
7.3		400.767	229.463	3		41768.2	668.411	4							7.3		2037.17	385.213	4			7.3		35157.7	674.3	2		28741.5	3167.25	2			7.3		660.467	289.284	3
7.317		424.9	248.41	3		41674.3	670.817	4							7.317		2134.72	397.092	4			7.317		35186	769.9	2		28656.7	3271.75	2			7.317		620.367	345.754	3
7.333		419.567	242.594	3		41705.9	637.155	4							7.333		2204.43	398.013	4			7.333		35162.3	695.85	2		28531.3	3238.65	2			7.333		735.6	236.891	3
7.35		420.867	246.035	3		41659.3	602.243	4							7.35		2114.15	424.671	4			7.35		35120.3	770.8	2		28809.3	3303.85	2			7.35		649.067	205.438	3
7.367		425.9	254.491	3		41677.6	640.072	4							7.367		2164.82	407.615	4			7.367		35136.3	840.9	2		28752.6	3372.8	2			7.367		595.567	242.583	3
7.383		413.3	246.45	3		41809.1	635.35	4							7.383		2307	406.086	4			7.383		35246.9	808.15	2		28735.8	3311.95	2			7.383		589.5	272.751	3
7.4		414.167	243.335	3		41759.2	635.581	4							7.4		2229.62	404.818	4			7.4		35104.4	791	2		28547.7	3189.65	2			7.4		601.867	272.008	3
7.417		435.667	256.373	3		41731.4	578.742	4							7.417		2129.43	413.052	4			7.417		35177.5	721.7	2		28665	3248.15	2			7.417		589.733	262.391	3
7.433		442.233	252.718	3		41715.4	599.039	4							7.433		2209.72	392.51	4			7.433		35145.8	769.05	2		28641.3	3288.55	2			7.433		692.3	245.784	3
7.45		457.033	271.407	3		41765.6	606.554	4							7.45		2182.28	412.153	4			7.45		35104.7	762.25	2		28714.6	3259.4	2			7.45		633.567	264.578	3
7.467		423.533	253.156	3		41743.8	591.876	4							7.467		2174.1	396.164	4			7.467		35076.4	711	2		28593.7	3130.2	2			7.467		596.533	301.502	3
7.483		436.233	262.958	3		41784.3	619.671	4							7.483		2201.6	413.439	4			7.483		35110.4	728.85	2		28501.5	3217.8	2			7.483		618.867	272.969	3
7.5		420.167	249.669	3		41704.7	573.07	4							7.5		2202.9	392.932	4			7.5		35134.6	736.2	2		28561.5	3328.05	2			7.5		692.6	197.996	3
7.517		424.967	254.412	3		41819.6	569.202	4							7.517		2319.32	408.846	4			7.517		35270.4	712.8	2		28625.2	3228.65	2			7.517		630.767	266.724	3
7.533		398.367	230.309	3		42039.3	540.981	4							7.533		2195.6	442.206	4			7.533		35205.2	714.8	2		28624.3	3294.7	2			7.533		656.3	206.442	3
7.55		418.867	249.533	3		42051.5	539.483	4							7.55		2160.75	394.959	4			7.55		35091.4	627.3	2		28504.4	3270	2			7.55		644.833	195.685	3
7.567		453.167	267.577	3		41980.4	627.245	4							7.567		2162.05	397.852	4			7.567		34889.1	587.25	2		28573.8	3258.2	2			7.567		704.6	241.616	3
7.583		450.4	276.543	3		41918.8	607.598	4							7.583		2303.43	407.166	4			7.583		35023.7	712	2		28705	3230.9	2			7.583		683.4	257.1	3
7.6		436.467	263.995	3		41960.3	571.175	4							7.6		2029.15	395.01	4			7.6		35043.3	726	2		28635.3	3251.65	2			7.6		609.133	214.541	3
7.617		430.7	249.127	3		41926.1	593.415	4							7.617		2177.82	403.249	4			7.617		35003	776	2		28558.4	3244.6	2			7.617		686.4	223.239	3
7.633		448.6	256.966	3		41929.6	546.37	4							7.633		2243.35	407.721	4			7.633		34908.2	815.8	2		28615.8	3273.15	2			7.633		570.5	258.231	3
7.65		440.967	247.864	3		41905.2	551.47	4							7.65		2240.35	405.894	4			7.65		34959.1	740.9	2		28645	3262.95	2			7.65		670.067	282.863	3
7.667		432.533	260.703	3		41949.5	559.593	4							7.667		2314.95	411.974	4			7.667		35038.3	761.8	2		28643.2	3204.25	2			7.667		682.8	280.653	3
7.683		428.7	250.275	3		41893.5	564.308	4							7.683		2275.85	427.599	4			7.683		35020.8	748.4	2		28617	3298.3	2			7.683		572.233	266.58	3
7.7		415.867	236.776	3		41915.5	540.919	4							7.7		2190.6	399.342	4			7.7		35075.4	806.25	2		28664.5	3202.2	2			7.7		507.133	250.16	3
7.717		403.4	228.121	3		41967.3	470.427	4							7.717		2238.4	415.268	4			7.717		34968.7	766.65	2		28657.5	3237.05	2			7.717		558.4	262.363	3
7.733		409.4	248.05	3		42023.3	566.901	4							7.733		2144.5	408.631	4			7.733		34901.4	792.7	2		28551.2	3245.25	2			7.733		603.867	217.493	3
7.75		440.5	259.652	3		42064.6	506.37	4							7.75		2178.75	404.192	4			7.75		34955.9	759.15	2		28476.1	3202.1	2			7.75		602.5	265.307	3
7.767		441.8	263.946	3		42054	536.002	4							7.767		2195.75	409.053	4			7.767		35081.4	716	2		28444.5	3298.85	2			7.767		632.533	304.49	3
7.783		443.433	261.452	3		42080.8	442.043	4							7.783		2268.82	406.134	4			7.783		34999.3	632.75	2		28577.6	3226.5	2			7.783		557.867	304.784	3
7.8		429.633	249.408	3		42089.5	528.137	4							7.8		2205.18	403.603	4			7.8		35034.1	645.8	2		28632.2	3236.65	2			7.8		583.9	278.411	3
7.817		428.933	245.814	3		42157.3	562.797	4							7.817		2215.03	405.955	4			7.817		34994.3	715.4	2		28558.8	3277.95	2			7.817		593.6	239.022	3
7.833		425	256.708	3		42275.3	535.646	4							7.833		2176.6	403.498	4			7.833		34891	689.9	2		28508.8	3256.6	2			7.833		581.433	238.181	3
7.85		452.5	275.881	3		42194.5	535.663	4							7.85		2018.92	394.939	4			7.85		34908.3	582.35	2		28560.5	3124.5	2			7.85		667.3	232.859	3
7.867		439.2	269.629	3		42214.3	512.742	4							7.867		2158.85	404.525	4			7.867		34893.6	597.1	2		28430	3204.5	2			7.867		684.833	302.369	3
7.883		431.467	250.163	3		42205.2	519.37	4							7.883		2146.12	401.718	4			7.883		34798.4	708.65	2		28449	3160.4	2			7.883		701.167	306.36	3
7.9		423.633	246.191	3		42258.2	483.068	4							7.9		2310.32	407.829	4			7.9		34819.5	622.8	2		28503.9	3240.4	2			7.9		666.033	295.144	3
7.917		424.9	245.435	3		42222.2	516.515	4							7.917		2283.82	404.946	4			7.917		34790.8	600.25	2		28417.8	3343.7	2			7.917		633.833	228.958	3
7.933		402.3	229.938	3		42177.2	526.196	4							7.933		2337.85	410.114	4			7.933		34821	656.2	2		28540.7	3256.85	2			7.933		546.833	252.461	3
7.95		419.733	238.621	3		42319.3	494.09	4							7.95		2315.85	411.323	4			7.95		34975.7	658.45	2		28378.1	3205.4	2			7.95		664.2	200.343	3
7.967		428.833	254.798	3		42272.6	512.4	4							7.967		2254.15	403.556	4			7.967		34844.2	678.85	2		28518	3278.25	2			7.967		595.033	243.438	3
7.983		425.367	239.947	3		42264.3	529.172	4							7.983		2231.32	401.553	4			7.983		34850.3	651.2	2		28542.5	3193.05	2			7.983		559.133	248.566	3
8		417.067	230.678	3		42291	482.89	4							8		2403.6	403.82	4			8		34886.7	716.15	2		28458.5	3084.6	2			8		640.367	222.57	3
8.017		431.967	263.094	3		42132.2	503.762	4							8.017		2177.88	433.067	4			8.017		34891.2	626.75	2		28514.7	3208.4	2			8.017		570.867	274.731	3
8.033		420.267	244.309	3		42166	436.85	4							8.033		2286.95	423.398	4			8.033		34881.5	762	2		28439	3148.85	2			8.033		556.467	245.159	3
8.05		464.167	286.815	3		42300.4	488.881	4							8.05		2386.53	418.702	4			8.05		34880.3	661.7	2		28401.2	3221.45	2			8.05		625.2	252.103	3
8.067		423.533	243.373	3		42329.4	474.784	4							8.067		2371.25	415.697	4			8.067		34906.2	708.85	2		28589.6	3272.6	2			8.067		689.033	300.5	3
8.083		401.733	247.711	3		42152.1	409.08	4							8.083		2304.43	396.869	4			8.083		34820.8	705.15	2		28436.1	3246.3	2			8.083		673.233	349.631	3
8.1		436.567	265.206	3		42213.3	391.257	4							8.1		2193.9	398.238	4			8.1		34815.8	656.45	2		28505.2	3265.6	2			8.1		675.867	323.754	3
8.117		433.967	266.056	3		42286.7	483.924	4							8.117		2266.45	420.976	4			8.117		34770.8	502.55	2		28424.7	3271.35	2			8.117		536.533	290.569	3
8.133		428.033	238.615	3		42355.2	449.094	4							8.133		2311.4	404.235	4			8.133		34705.5	596.8	2		28342.5	3213.15	2			8.133		556.333	270.501	3
8.15		429.5	258.442	3		42338.3	405.367	4							8.15		2260.03	403.143	4			8.15		34797.6	598.1	2		28437.2	3260.35	2			8.15		676.633	294.393	3
8.167		440.767	253.621	3		42206.4	428.891	4							8.167		2258.85	408.524	4			8.167		34748.8	602.35	2		28363.7	3275.75	2			8.167		676.733	276.62	3
8.183		434.767	268.223	3		42196.9	456.445	4							8.183		2255.43	404.804	4			8.183		34814.3	553.25	2		28390.5	3160.95	2			8.183		620.033	268.678	3
8.2		436.067	265.46	3		42169.3	508.808	3							8.2		2245.25	395.15	4			8.2		34783	607.1	2		28405	3237.65	2			8.2		630.233	280.272	3
8.217		452.833	287.274	3		42231.3	495.522	3							8.217		2224	397.873	4			8.217		34677.5	621.3	2		28298.2	3292.05	2			8.217		532.667	219.209	3
8.233		404.467	246.161	3		42140	578.591	3							8.233		2310.9	421.721	4			8.233		34757.9	586.7	2		28419.4	3310.6	2			8.233		498.7	273.658	3
8.25		446.833	266.719	3		42254.2	521.411	3							8.25		2257.07	399.431	4			8.25		34697.3	640.25	2		28529.8	3240.25	2			8.25		510.833	218.963	3
8.267		435.233	268.939	3		42007.9	516.602	3							8.267		2408.25	417.938	4			8.267		34747.8	624.9	2		28396.8	3272.45	2			8.267		522.7	215.485	3
8.283		444.667	268.115	3		42173.8	437.069	3							8.283		2205.57	399.594	4			8.283		34741	638.8	2		28376.5	3139.75	2			8.283		619.767	246.885	3
8.3		476.367	289.276	3		42184.4	516.272	3							8.3		2275.65	396.623	4			8.3		34780.4	648.95	2		28419.1	3224	2			8.3		550.033	256.806	3
8.317		431.967	276.073	3		42151.3	531.646	3							8.317		2365.7	422.18	4			8.317		34790.4	701.55	2		28415.6	3269.7	2			8.317		605.133	230.466	3
8.333		413.967	230.687	3		41995.1	477.374	3							8.333		2301.93	418.724	4			8.333		34699.7	691.95	2		28368.5	3231.15	2			8.333		592.8	247.266	3
8.35		457.567	281.646	3		42193.4	564.643	3							8.35		2343.9	414.553	4			8.35		34742.8	669.45	2		28307.2	3371.65	2			8.35		489	201.348	3
8.367		443.2	281.669	3		42257.4	600.142	3							8.367		2198.32	391.364	4			8.367		34754.8	671.55	2		28379.3	3194.65	2			8.367		522.233	175.358	3
8.383		440.4	267.296	3		42329.4	607.324	3							8.383		2396.45	404.262	4			8.383		34604.8	614	2		28337	3102.15	2			8.383		621.9	193.971	3
8.4		472.267	292.426	3		42249.2	597.848	3							8.4		2198.78	409.478	4			8.4		34687.1	638.25	2		28309.4	3183	2			8.4		670.167	246.359	3
8.417		477.933	306.067	3		42298.4	576.66	3							8.417		2215.45	390.825	4			8.417		34605.2	565.65	2		28292.5	3290	2			8.417		655.7	314.23	3
8.433		455.467	286.888	3		42177.3	547.602	3							8.433		2348.05	395.767	4			8.433		34638.9	545.4	2		28327.8	3347.65	2			8.433		576	346.729	3
8.45		466.267	298.852	3		42252.8	618.928	3							8.45		2127.25	393.571	4			8.45		34674.2	607.15	2		28387.2	3289.25	2			8.45		658.633	255.881	3
8.467		444.067	262.335	3		42402.1	586.501	3							8.467		2227.38	419.138	4			8.467		34683.6	596.85	2		28215.2	3283.9	2			8.467		536.633	224.416	3
8.483		428.867	255.904	3		42251.1	490.899	3							8.483		2273.55	408.36	4			8.483		34694.3	580.05	2		28394	3267.35	2			8.483		519.133	288.384	3
8.5		460.033	284.018	3		42107.9	479.239	3							8.5		2213.62	421.512	4			8.5		34607.1	595	2		28304.2	3273.05	2			8.5		572.1	333.504	3
8.517		442.033	285.96	3		42182.2	553.336	3							8.517		2308.8	404.919	4			8.517		34554.1	587.55	2		28361.5	3184.75	2			8.517		650.6	263.517	3
8.533		451.033	279.828	3		42319.6	466.344	3							8.533		2239.3	398.274	4			8.533		34611.8	611.5	2		28266.2	3278.1	2			8.533		519.333	307.558	3
8.55		479.533	308.807	3		42321	516.043	3							8.55		2236.43	397.686	4			8.55		34662.6	646.75	2		28253.5	3149.05	2			8.55		530.1	250.916	3
8.567		452.767	269.872	3		42265.8	540.876	3							8.567		2186.57	398.313	4			8.567		34585.1	650.7	2		28368.5	3265.7	2			8.567		543.1	321.801	3
8.583		440.033	278.349	3		42307.2	484.771	3							8.583		2397.2	430.332	4			8.583		34621.5	512	2		28377.2	3191.55	2			8.583		538.867	289.875	3
8.6		485.033	323.871	3		42299.1	564.221	3							8.6		2324.93	431.73	4			8.6		34614.4	651.45	2		28288.3	3289.6	2			8.6		549.8	213.608	3
8.617		477.633	303.335	3		42505.6	544.612	3							8.617		2265.05	410.491	4			8.617		34621.2	595.85	2		28247.6	3129.7	2			8.617		520.467	234.617	3
8.633		490.833	317.602	3		42373.1	503.755	3							8.633		2328.3	434.027	4			8.633		34621.9	601.15	2		28355.4	3177.5	2			8.633		542.133	230.748	3
8.65		478.9	323.428	3		42351.4	558.068	3							8.65		2445.95	413.492	4			8.65		34663.7	536.3	2		28201.8	3160.3	2			8.65		569.667	254.755	3
8.667		478.467	308.273	3		42083.7	516.486	3							8.667		2282.07	402.304	4			8.667		34644.6	655.25	2		28391.2	3188.55	2			8.667		675.533	234.447	3
8.683		467.567	291.427	3		42157.2	503.288	3							8.683		2389.85	408.016	4			8.683		34647.2	671.85	2		28398.8	3230.2	2			8.683		524.867	252.183	3
8.7		500.3	330.659	3		42298.8	487.394	3							8.7		2189.8	397.694	4			8.7		34478.8	632.75	2		28348.5	3254.55	2			8.7		495.533	222.338	3
8.717		479.233	305.987	3		42218.3	463.389	3							8.717		2298.78	404.005	4			8.717		34446.1	532.05	2		28298.8	3214.9	2			8.717		518.8	269.419	3
8.733		455.667	284.013	3		42214.8	489.149	3							8.733		2307	399.695	4			8.733		34476.4	590.35	2		28422.5	3278.25	2			8.733		590	234.666	3
8.75		483.933	307.839	3		42472.4	633.526	3							8.75		2192.12	428.928	4			8.75		34481	515.4	2		28266.6	3244.9	2			8.75		451.867	233.72	3
8.767		489	310.592	3		42302.1	583.426	3							8.767		2280	422.383	4			8.767		34488.2	564.7	2		28246	3317.15	2			8.767		540.033	238.828	3
8.783		499.433	330.248	3		42401.2	587.02	3							8.783		2250.95	410.286	4			8.783		34577.8	620.05	2		28206.6	3233.7	2			8.783		545.933	286.785	3
8.8		477.667	314.713	3		42353.2	622.617	3							8.8		2362.78	413.73	4			8.8		34567.1	528.7	2		28109.6	3112.4	2			8.8		658.9	235.93	3
8.817		469.633	297.526	3		42368.9	539.993	3							8.817		2390.22	410.643	4			8.817		34513.1	657.5	2		28123.8	3329.2	2			8.817		509.033	205.706	3
8.833		496.2	329.613	3		42267.4	528.071	3							8.833		2332.53	408.465	4			8.833		34439.8	594.75	2		28268.8	3148.05	2			8.833		579.833	152.969	3
8.85		480.533	309.242	3		42424.1	564.405	3							8.85		2362.57	411.177	4			8.85		34544.1	561.4	2		28211.8	3287.35	2			8.85		539.367	216.37	3
8.867		503.267	328.714	3		42469.3	569.082	3							8.867		2350	409.459	4			8.867		34563.2	599.75	2		28288.8	3259.9	2			8.867		548.7	256.87	3
8.883		482.867	316.963	3		42418.4	574.301	3							8.883		2356.53	406.464	4			8.883		34547.5	516.2	2		28259.1	3326.2	2			8.883		567.867	236.842	3
8.9		485.933	306.617	3		42318.9	528.077	3							8.9		2348.75	408.689	4			8.9		34531.2	626.5	2		28163.8	3144.6	2			8.9		572.167	165.879	3
8.917		474.833	300.154	3		42420.5	549.858	3							8.917		2370.38	414.291	4			8.917		34532.7	587.9	2		28373	3206.75	2			8.917		576.9	214.052	3
8.933		470.767	304.457	3		42220.2	540.438	3							8.933		2401.43	420.485	4			8.933		34493.8	595.5	2		28337.3	3150.4	2			8.933		577.733	234.766	3
8.95		477.2	300.817	3		42447.3	639.845	3							8.95		2362.82	422.607	4			8.95		34552.6	587.55	2		28195.3	3110.2	2			8.95		559.467	255.172	3
8.967		487.733	313.471	3		42366.4	536.793	3							8.967		2232.88	402.37	4			8.967		34518.1	632.1	2		28353.4	3210.5	2			8.967		504.8	222.535	3
8.983		485.5	319.981	3		42322.9	511.652	3							8.983		2306.22	399.154	4			8.983		34415.8	653.75	2		28215.2	3235.7	2			8.983		549.7	245.589	3
9		490.9	306.459	3		42415.7	565.382	3							9		2384.32	424.887	4			9		34427.8	663	2		28336.4	3349.1	2			9		619.5	310.803	3
9.017		445	282.678	3		42429.6	629.168	3							9.017		2444.35	446.162	4			9.017		34392.9	632.95	2		28272.4	3213.4	2			9.017		603.867	329.555	3
9.033		510.5	340.876	3		42125.4	570.02	3							9.033		2256.75	406.214	4			9.033		34403.4	637.55	2		28217.3	3251.7	2			9.033		512.367	248.969	3
9.05		496.4	314.071	3		42357	566.632	3							9.05		2371	405.018	4			9.05		34437.3	651	2		28260.5	3255.85	2			9.05		577.633	185.885	3
9.067		481.033	313.862	3		42380.2	562.883	3							9.067		2467.57	422.701	4			9.067		34449.2	627.85	2		28236	3199.2	2			9.067		533.967	263.466	3
9.083		479.767	313.179	3		42210.2	524.299	3							9.083		2479.6	445.544	4			9.083		34440.3	543.7	2		28192.3	3158.9	2			9.083		445.433	186.925	3
9.1		512.8	348.705	3		42395.9	622.609	3							9.1		2329.9	413.324	4			9.1		34371.7	634.35	2		28155.8	3343.05	2			9.1		559.1	152.153	3
9.117		483.733	318.567	3		42377.2	536.941	3							9.117		2547.7	424.434	4			9.117		34342.2	682.4	2		28158.7	3080.45	2			9.117		579.533	221.234	3
9.133		495.167	318.071	3		42314.2	508.623	3							9.133		2398.2	404.095	4			9.133		34489.9	613.7	2		28237.3	3176.1	2			9.133		535.467	236.188	3
9.15		521.167	343.219	3		42392.3	607.803	3							9.15		2393.25	415.074	4			9.15		34478.7	532.7	2		28208.8	3306.15	2			9.15		523.9	204.035	3
9.167		488.567	315.015	3		42429.2	540.125	3							9.167		2400.12	413.061	4			9.167		34509.3	607.7	2		28192.9	3359.7	2			9.167		475.833	227.304	3
9.183		492.5	322.486	3		42364.7	582.448	3							9.183		2354.57	428.034	4			9.183		34376	536.2	2		28209.5	3223.85	2			9.183		474.233	193.645	3
9.2		511.867	345.818	3		42316.7	511.921	3							9.2		2335.55	404.998	4			9.2		34398.8	592.95	2		28216.7	3219.3	2			9.2		454.2	245	3
9.217		510.867	331.091	3		42326.2	514.833	3							9.217		2403.03	413.995	4			9.217		34440.9	604.25	2		28285.9	3280.1	2			9.217		467.667	285.105	3
9.233		496.933	326.106	3		42343.7	515.716	3							9.233		2274.35	412.737	4			9.233		34331.2	607	2		28245.7	3199.3	2			9.233		627.9	167.602	3
9.25		502.2	336.939	3		42343.2	563.555	3							9.25		2495.12	449.474	4			9.25		34377.4	646.1	2		28185.5	3155.65	2			9.25		509.2	238.089	3
9.267		521.067	343.979	3		42300.1	558.937	3							9.267		2450.03	434.523	4			9.267		34398.4	610.65	2		28102	3265.15	2			9.267		577.367	291.803	3
9.283		530.2	349.808	3		42353	587.456	3							9.283		2356.68	418.413	4			9.283		34361.7	543.85	2		28298.8	3137.9	2			9.283		580.2	283.557	3
9.3		493.7	325.739	3		42264.8	532.561	3							9.3		2242.03	394.623	4			9.3		34380.4	641.15	2		28124.3	3128.35	2			9.3		495.633	207.21	3
9.317		502.667	326.648	3		42340.5	533.615	3							9.317		2665.45	424.298	4			9.317		34308.6	633.95	2		28188	3045.2	2			9.317		472.367	220.946	3
9.333		495.267	320.218	3		42252	524.766	3							9.333		2381.7	405.747	4			9.333		34298.2	537.25	2		28174.8	3317.4	2			9.333		604.7	155.106	3
9.35		480.333	312.596	3		42315.1	612.84	3							9.35		2430.85	418.034	4			9.35		34434.2	571.6	2		28264.9	3215.5	2			9.35		452.433	227.843	3
9.367		483.667	313	3		42250.6	551.491	3							9.367		2278.72	414.34	4			9.367		34388.7	551.2	2		28217.3	3299.35	2			9.367		490.067	182.997	3
9.383		510.233	336.2	3		42242.1	512.819	3							9.383		2505.3	422.418	4			9.383		34320.9	559.45	2		28278.6	3139.5	2			9.383		562.067	194.1	3
9.4		482.267	307.702	3		42253.5	535.145	3							9.4		2284.57	405.36	4			9.4		34368.9	634.5	2		28078.2	3217.6	2			9.4		598.433	226.634	3
9.417		455.9	302.69	3		42278.6	587.124	3							9.417		2355.43	421.822	4			9.417		34386.5	512.6	2		28059.7	3220.6	2			9.417		481.233	206.254	3
9.433		512.6	336.033	3		42307.3	498.39	3							9.433		2416.3	415.75	4			9.433		34337.4	597.2	2		28127.7	3246.25	2			9.433		623.433	198.195	3
9.45		498.9	328.733	3		42248.6	502.158	3							9.45		2336.28	398.977	4			9.45		34309.8	546.25	2		28118.5	3260	2			9.45		529.6	248.075	3
9.467		488.1	322.389	3		42273.6	564.12	3							9.467		2440.53	434.397	4			9.467		34301.8	619.8	2		28225.5	3150.55	2			9.467		551.367	168.627	3
9.483		509.167	333.872	3		42269	563.408	3							9.483		2588.6	425.357	4			9.483		34296.3	492.5	2		28102.5	3208.85	2			9.483		545.433	227.778	3
9.5		459.367	288.491	3		42303.9	573.52	3							9.5		2418.45	406.249	4			9.5		34313.6	552	2		28207.3	3149.45	2			9.5		516.5	294.553	3
9.517		476.633	301.398	3		42334.7	509.645	3							9.517		2371.12	424.189	4			9.517		34340.8	488.85	2		28260.1	3098.3	2			9.517		610.367	191.437	3
9.533		487.333	311.849	3		42242.5	535.469	3							9.533		2408.18	441.956	4			9.533		34328.8	519.65	2		28256.5	3149.95	2			9.533		484.4	268.144	3
9.55		489.6	315.217	3		42284.8	535.473	3							9.55		2555.8	420.331	4			9.55		34340.8	488.35	2		28073.8	3147.05	2			9.55		557.733	273.761	3
9.567		478.667	313.173	3		42327.4	545.006	3							9.567		2470.88	421.991	4			9.567		34333.2	523.85	2		28137.1	3268.7	2			9.567		444.8	304.156	3
9.583		482.833	320.707	3		42219.3	596.404	3							9.583		2417.38	415.497	4			9.583		34361.4	585.9	2		28132.3	3279.2	2			9.583		550.3	259.563	3
9.6		473.7	319.055	3		42198.1	522.08	3							9.6		2461.82	428.303	4			9.6		34321.4	487.5	2		28127.1	3161.2	2			9.6		482.067	279.285	3
9.617		489.7	313.214	3		42180.1	550.376	3							9.617		2486.53	425.326	4			9.617		34260.4	533.35	2		28108.5	3189.9	2			9.617		602.5	262.709	3
9.633		523.567	351.869	3		42217.8	543.92	3							9.633		2327.7	399.469	4			9.633		34284.3	583.4	2		28164.2	3231.95	2			9.633		548.333	263.127	3
9.65		502.4	325.246	3		42198.9	594.6	3							9.65		2448.45	405.364	4			9.65		34280	528.4	2		28236	3091.3	2			9.65		487.9	311.079	3
9.667		486.767	321.046	3		42183.8	555.19	3							9.667		2401.07	412.192	4			9.667		34300.4	567.7	2		28200.8	3225.1	2			9.667		530.167	287.026	3
9.683		530.767	352.004	3		42198.2	543.379	3							9.683		2499.9	461.453	4			9.683		34280.4	519.95	2		27992.7	3112.45	2			9.683		451.8	276.704	3
9.7		522.1	348.365	3		42213.9	512.682	3							9.7		2465.18	413.151	4			9.7		34329.7	621.7	2		28017.8	3140.75	2			9.7		505.8	269.921	3
9.717		493.3	328.856	3		42260.1	401.977	3							9.717		2282.7	422.662	4			9.717		34268.3	543.2	2		28201.3	3159.7	2			9.717		496.533	279.087	3
9.733		467.6	304.634	3		42104.1	570.409	3							9.733		2432.62	424.84	4			9.733		34214.4	586.7	2		28146.1	3214.4	2			9.733		519.5	215.444	3
9.75		495.2	324.979	3		42175.1	526.805	3							9.75		2472.65	463.727	4			9.75		34246	541.2	2		28146	3153.85	2			9.75		493.767	216.761	3
9.767		506.133	346.51	3		42175.1	484.503	3							9.767		2455.47	425.183	4			9.767		34266.1	504.75	2		28149.5	3221.15	2			9.767		466.233	198.54	3
9.783		480.6	326.55	3		42085.9	525.997	3							9.783		2448.57	461.27	4			9.783		34168.1	542.65	2		28107.8	3228.25	2			9.783		565.1	261.701	3
9.8		512.1	345.484	3		42109.6	534.599	3							9.8		2336.75	411.582	4			9.8		34102.6	449.1	2		28057.3	3293.75	2			9.8		554.167	206.567	3
9.817		502.333	331.815	3		42086.3	563.915	3							9.817		2434.43	415.914	4			9.817		34102.6	386	2		28060	3144.65	2			9.817		453.9	250.818	3
9.833		497.233	332.622	3		42242.4	552.477	3							9.833		2627.5	428.912	4			9.833		34209.8	517.15	2		28145.7	3215.95	2			9.833		601.8	243.753	3
9.85		492.6	324.716	3		42156.9	594.746	3							9.85		2369.5	420.943	4			9.85		34193.9	566.15	2		28052.3	3304.8	2			9.85		576.467	215.469	3
9.867		510.533	339.084	3		42133.4	508.844	3							9.867		2554.88	412.273	4			9.867		34068.6	536.5	2		28111	3224.65	2			9.867		534.867	229.222	3
9.883		488.5	318.328	3		42159.5	585.802	3							9.883		2488.28	435.134	4			9.883		34120.6	636.85	2		28045.5	3166.45	2			9.883		501.467	205.241	3
9.9		492.967	321.249	3		42152.3	574.041	3							9.9		2441.65	413.728	4			9.9		34208.8	551.4	2		28050.7	3128.8	2			9.9		539.3	128.112	3
9.917		479.8	308.758	3		42066.7	558.519	3							9.917		2447.68	414.134	4			9.917		34110.8	600.15	2		28132.5	3141.35	2			9.917		472.667	157.53	3
9.933		492.733	313.587	3		42111.5	505.549	3							9.933		2681.07	431.891	4			9.933		34122.7	530.9	2		28084.2	3210.2	2			9.933		447.567	157.708	3
9.95		493.033	319.409	3		42109	523.656	3							9.95		2468.2	422.053	4			9.95		34103.7	537.25	2		28048	3183.35	2			9.95		455.867	231.787	3
9.967		484.767	318.863	3		42123	616.171	3							9.967		2388.88	412.947	4			9.967		34139.4	642.8	2		28066.5	3198.65	2			9.967		535.267	235.797	3
9.983		484.733	310.381	3		42133.6	498.617	3							9.983		2616.05	436.52	4			9.983		34122.5	547.7	2		27926.7	3218.05	2			9.983		547.4	184.483	3
10		524.2	349.125	3		42083.3	597.434	3							10		2480.75	424.348	4			10		34066.8	649.95	2		28027.8	3198.15	2			10		527.7	208.801	3
10.017		529.933	355.859	3		42121.6	569.432	3							10.017		2534.47	450.521	4			10.017		34043.5	609.3	2		28019.4	3243.5	2			10.017		512.4	231.948	3
10.033		511.1	328.992	3		42051.8	570.474	3							10.033		2442.8	408.173	4			10.033		34161.4	512.25	2		28053.9	3200.9	2			10.033		391.5	303.802	3
10.05		527.333	341.702	3		42050.2	538.956	3							10.05		2444.43	410.392	4			10.05		34042	570.3	2		28034.3	3141.1	2			10.05		540.867	228.029	3
10.067		527.733	354.775	3		42066.8	547.382	3							10.067		2386.9	424.135	4			10.067		34152	557.6	2		27977.2	3087.75	2			10.067		549.7	211.313	3
10.083		509.7	337.219	3		42071.2	601.66	3							10.083		2503.55	408.927	4			10.083		34073.9	494.05	2		28051	3182.15	2			10.083		513.067	225.69	3
10.1		500.4	335.74	3		42113.9	484.517	3							10.1		2487.95	430.83	4			10.1		34109.2	488.6	2		27937.1	3141.9	2			10.1		499.467	308.729	3
10.117		489.233	324.381	3		42119.8	542.851	3							10.117		2440.47	406.26	4			10.117		34024.5	619.7	2		27969.7	3159	2			10.117		552.233	316.253	3
10.133		487.767	315.121	3		42151.7	507.76	3							10.133		2563.1	460.376	4			10.133		34051.9	584.45	2		28001.4	3130.5	2			10.133		554.067	258.903	3
10.15		505.567	324.249	3		42118.3	521.396	3							10.15		2497.05	444.48	4			10.15		34030.6	605.7	2		28040.5	3283.75	2			10.15		491.4	190.383	3
10.167		499.3	330.693	3		42163.9	562.97	3							10.167		2449.47	431.432	4			10.167		34036	507	2		28078.3	3248.75	2			10.167		504.567	264.48	3
10.183		519.267	339.114	3		42054.2	535.985	3							10.183		2407.6	415.309	4			10.183		33964.9	605.7	2		27931.3	3274.7	2			10.183		478.833	215.931	3
10.2		497.767	319.401	3		42082.2	569.322	3							10.2		2560.6	440.847	4			10.2		33913.3	489.1	2		27992.2	3064.25	2			10.2		516.333	247.241	3
10.217		514.567	337.171	3		42045	573.94	3							10.217		2512.25	456.919	4			10.217		34099.3	600.25	2		28063.2	3249.15	2			10.217		491.733	218.618	3
10.233		497.267	321.686	3		42087.6	503.086	3							10.233		2609.95	446.245	4			10.233		34024.8	546.55	2		27916.3	3214.5	2			10.233		402.3	263.305	3
10.25		495.2	328.445	3		42094.2	552.101	3							10.25		2567.7	419.467	4			10.25		33977.2	537.35	2		28059	3174.55	2			10.25		466.867	293.857	3
10.267		513.067	331.764	3		42092.4	530.658	3							10.267		2430.9	411.722	4			10.267		34005.4	616.95	2		28019.2	3260.95	2			10.267		495.4	232.78	3
10.283		512.467	343.785	3		42156.6	512.163	3							10.283		2471.47	446.507	4			10.283		34002.2	605.75	2		27984.6	3169.4	2			10.283		517.2	246.665	3
10.3		504.333	341.507	3		42117.9	511.961	3							10.3		2597.65	418.16	4			10.3		34091.4	474.05	2		27987.5	3155.6	2			10.3		522.967	234.261	3
10.317		475.867	305.165	3		42045.4	589.368	3							10.317		2560.82	418.694	4			10.317		34057.9	582.35	2		27987.7	3148.35	2			10.317		515.733	195.252	3
10.333		503.067	340.354	3		42019.6	563.536	3							10.333		2569.1	446.477	4			10.333		34074.7	578.05	2		28035.9	3138.1	2			10.333		491.1	202.758	3
10.35		502.7	336.201	3		42135.4	478.107	3							10.35		2415.4	407.741	4			10.35		34069.2	574.45	2		28000.5	3139.5	2			10.35		522.267	229.818	3
10.367		523.267	347.494	3		42088.6	490.819	3							10.367		2470.2	433.099	4			10.367		34028.7	560.25	2		27940.8	3097.75	2			10.367		499.767	267.48	3
10.383		518.633	350.509	3		42142.1	515.086	3							10.383		2552.95	423.523	4			10.383		33932.7	601.6	2		27930.4	3148.8	2			10.383		356.433	221.561	3
10.4		468.7	303.516	3		42158.2	469.248	3							10.4		2468	423.949	4			10.4		33976.2	465.55	2		28000.3	3219.5	2			10.4		493.067	173.699	3
10.417		504.767	327.752	3		42109.2	495.703	3							10.417		2581.38	432.676	4			10.417		33992.4	530.05	2		27991.3	3232.75	2			10.417		424.067	169.692	3
10.433		475.533	299.584	3		42164.2	481.02	3							10.433		2526.82	430.125	4			10.433		34037.8	498.45	2		27969.7	3142.8	2			10.433		430.133	208.227	3
10.45		502.267	339.137	3		42158.1	460.843	3							10.45		2386.15	432.185	4			10.45		33973.4	604.7	2		27972.8	3189.65	2			10.45		495.533	228.213	3
10.467		502	325.558	3		42081.2	441.646	3							10.467		2529.97	419.408	4			10.467		33919.1	510.55	2		27927.8	3095.55	2			10.467		341.033	212.224	3
10.483		480.633	320.046	3		42101.3	514.049	3							10.483		2484	424.62	4			10.483		33884.2	445	2		27879	3068.75	2			10.483		394.767	242.623	3
10.5		487.9	314.751	3		42148.2	540.374	3							10.5		2479.72	421.791	4			10.5		33933.6	458.15	2		27953.7	3164.6	2			10.5		467.267	224.969	3
10.517		516.1	338.085	3		42092.2	524.09	3							10.517		2493.2	429.311	4			10.517		33960.3	471.95	2		27925	3227.25	2			10.517		479.633	250.805	3
10.533		496.033	327.809	3		42157.3	511.062	3							10.533		2548.5	487.663	4			10.533		33884.4	519.75	2		27956.5	3182.6	2			10.533		510.267	257.071	3
10.55		501.867	322.519	3		42086.1	562.303	3							10.55		2509.43	443.672	4			10.55		33896.3	351.05	2		27998.8	3119.1	2			10.55		444.5	246.251	3
10.567		502.133	331.042	3		42202.5	556.335	3							10.567		2404.85	430.207	4			10.567		33929.2	493.35	2		27960.3	3231.25	2			10.567		502.6	180.607	3
10.583		495.3	309.237	3		42164.6	523.321	3							10.583		2410.12	415.039	4			10.583		33914.4	518.55	2		27921.4	3226.3	2			10.583		449.067	243.031	3
10.6		522.8	346.638	3		42219.5	542.323	3							10.6		2683.38	464.052	4			10.6		33902.7	515.65	2		27925.2	3291.05	2			10.6		522.1	245.486	3
10.617		504.667	335.417	3		42235.4	480.797	3							10.617		2409.53	436.062	4			10.617		33937.9	548.35	2		27987.5	3201.75	2			10.617		531.7	241.306	3
10.633		486.633	302.223	3		42131	545.297	3							10.633		2539.82	426.281	4			10.633		33826.8	489.8	2		27876.2	3177.9	2			10.633		502.633	303.697	3
10.65		512.733	340.702	3		42111.6	486.146	3							10.65		2537.7	428.041	4			10.65		33885.2	578.65	2		28007	3260.35	2			10.65		505.233	231.367	3
10.667		499.5	337.046	3		42127.1	507.833	3							10.667		2526.8	445.905	4			10.667		33908.2	629.5	2		27987.4	3187	2			10.667		453.267	223.283	3
10.683		529.967	354.587	3		42109.9	532.319	3							10.683		2528.93	440	4			10.683		33899.3	571.15	2		27975.2	3179.05	2			10.683		563.7	258.034	3
10.7		515.933	341.023	3		42103.2	539.207	3							10.7		2410.97	421.252	4			10.7		34015.4	581.4	2		27885	3204.25	2			10.7		618.5	248.233	3
10.717		491.533	310.943	3		42159.4	512.527	3							10.717		2644.12	418.05	4			10.717		33950.4	493.5	2		27781.5	3201.3	2			10.717		525.567	229.192	3
10.733		512.733	344.721	3		42177.1	501.772	3							10.733		2544.3	440.355	4			10.733		33901.1	538.05	2		27788.7	3286.7	2			10.733		385.533	278.267	3
10.75		494	343.412	3		42219.5	493.053	3							10.75		2540.47	420.95	4			10.75		33962.1	494	2		27903	3159.2	2			10.75		442.233	276.217	3
10.767		503.6	330.568	3		42290.7	445.827	3							10.767		2566.38	429.212	4			10.767		33836.3	499.65	2		27798.8	3104.05	2			10.767		595.3	249.336	3
10.783		507.867	345.979	3		42096.4	520.989	3							10.783		2502.68	409.692	4			10.783		33833.1	468.6	2		27738.8	3128.45	2			10.783		512.933	276.98	3
10.8		480.7	310.195	3		42135.7	486.231	3							10.8		2709.35	465.11	4			10.8		33895.9	517.5	2		27754.4	3190.4	2			10.8		487.933	243.346	3
10.817		502.867	329.069	3		42105.2	503.33	3							10.817		2426.43	423.111	4			10.817		33859.4	484.4	2		27805.2	3211.05	2			10.817		452.467	202.811	3
10.833		483.567	317.192	3		42182.2	498.825	3							10.833		2535.03	435.391	4			10.833		33847.1	518.1	2		27843.8	3188.95	2			10.833		456.1	211.783	3
10.85		491.967	326.933	3		42165.2	488.782	3							10.85		2538.43	438.6	4			10.85		33848.8	513.1	2		27823	3256.45	2			10.85		590.267	230.169	3
10.867		514.933	340.138	3		42190.2	474.181	3							10.867		2500.8	422.969	4			10.867		33851.1	519.9	2		27806.7	3219.85	2			10.867		504.733	250.577	3
10.883		511.467	332.723	3		42239.4	444.991	3							10.883		2609.53	434.923	4			10.883		33796.6	505.8	2		27895	3242	2			10.883		483.4	271.93	3
10.9		496.967	316.979	3		42199	550.324	3							10.9		2636.53	498.602	4			10.9		33833.6	607.6	2		27910.5	3239	2			10.9		438.1	334.168	3
10.917		502.7	328.025	3		42273.4	492.655	3							10.917		2714.4	423.997	4			10.917		33837.4	493.75	2		27994.2	3304.15	2			10.917		416.667	290.318	3
10.933		510	323.034	3		42220.6	476.333	3							10.933		2547.05	429.478	4			10.933		33818.5	474.4	2		28014	3279.85	2			10.933		473.267	280.252	3
10.95		500.7	335.278	3		42166	450.443	3							10.95		2615.05	441.029	4			10.95		33796.5	537	2		27827.7	3275.45	2			10.95		489.733	281.504	3
10.967		481.9	336.776	3		42203	472.029	3							10.967		2670.85	440.412	4			10.967		33734.3	469.5	2		27850.8	3214	2			10.967		408.5	274.973	3
10.983		510.1	333.317	3		42219.2	465.657	3							10.983		2678.4	473.162	4			10.983		33794.6	557.65	2		27901.3	3159.9	2			10.983		445.4	213.318	3
11		529.6	344.742	3		42223.2	506.827	3							11		2696.43	456.668	4			11		33782.8	512.2	2		27818.2	3261.55	2			11		388.567	214.632	3
11.017		515.133	336.469	3		42236.9	448.699	3							11.017		2776.82	424.578	4			11.017		33815.9	492.85	2		27730.9	3147	2			11.017		479.5	188.456	3
11.033		496	330.623	3		42222.5	500.649	3							11.033		2515.7	424.893	4			11.033		33864.7	513.7	2		27742.5	3274.75	2			11.033		402.567	210.697	3
11.05		517.433	343.641	3		42210	534.957	3							11.05		2646.45	456.035	4			11.05		33851.6	498.05	2		27839.1	3185	2			11.05		329.367	194.725	3
11.067		478.133	299.213	3		42087.8	548.264	3							11.067		2631.32	428.265	4			11.067		33778.8	547.75	2		27746.2	3098.7	2			11.067		444.033	176.795	3
11.083		508.9	340.118	3		42237.5	479.924	3							11.083		2623.2	449.809	4			11.083		33756.1	466.3	2		27866.5	3357.35	2			11.083		376.167	213.444	3
11.1		522.567	349.54	3		42199.3	506.114	3							11.1		2545.57	468.447	4			11.1		33806.2	524.15	2		27778.5	3225.45	2			11.1		454.833	228.357	3
11.117		499.533	329.716	3		42169.5	550.268	3							11.117		2700.65	432.345	4			11.117		33799.4	504.3	2		27876.3	3251.95	2			11.117		414.4	292.014	3
11.133		477.3	325.035	3		42191.7	544.732	3							11.133		2597.95	449.337	4			11.133		33781.6	522.1	2		27958.2	3234.95	2			11.133		519.933	232.313	3
11.15		529.467	358.941	3		42177.7	510.877	3							11.15		2563.5	439.93	4			11.15		33735.1	525.3	2		27852.5	3283.75	2			11.15		424.433	209.087	3
11.167		509.967	335.687	3		42220.6	513.421	3							11.167		2633.05	419.547	4			11.167		33795.7	524.65	2		27842	3207.65	2			11.167		488.633	222.641	3
11.183		501.167	338.751	3		42219.7	490.543	3							11.183		2606.35	457.932	4			11.183		33729.6	533.6	2		27803.7	3309.85	2			11.183		434.6	185.567	3
11.2		513.4	328.414	3		42153.5	556.011	3							11.2		2822.57	468.615	4			11.2		33669.2	499.4	2		27854.1	3240.6	2			11.2		397.9	231.152	3
11.217		509.833	340.618	3		42204.1	520.618	3							11.217		2704.8	436.051	4			11.217		33617.2	416.95	2		27877.8	3341.25	2			11.217		455.933	218.949	3
11.233		510.3	344.828	3		42219.4	516.827	3							11.233		2651.07	433.235	4			11.233		33614.2	470.15	2		27975	3301.9	2			11.233		458.8	184.356	3
11.25		516.133	333.341	3		42192.5	528.879	3							11.25		2548.1	421.112	4			11.25		33583.6	405.1	2		27863.8	3235.55	2			11.25		462.433	178.96	3
11.267		502.2	326.788	3		42197.4	536.916	3							11.267		2650.9	448.38	4			11.267		33728.2	351.45	2		27825.5	3244.8	2			11.267		418.733	199.305	3
11.283		518.633	344.564	3		42228.4	484.388	3							11.283		2500.85	434.712	4			11.283		33649.9	418.35	2		27771.8	3306.25	2			11.283		383.833	201.288	3
11.3		522.4	346.218	3		42170	589.472	3							11.3		2638.7	418.324	4			11.3		33695.2	499.1	2		27722.8	3285.95	2			11.3		426.2	229.611	3
11.317		499.433	335.536	3		42149.2	572.495	3							11.317		2744.47	418.665	4			11.317		33635.9	522.95	2		27877.1	3318.9	2			11.317		483.567	235.521	3
11.333		512.667	342.428	3		42209.9	553.33	3							11.333		2669.03	425.094	4			11.333		33681.4	492.55	2		27837.6	3264.3	2			11.333		416.967	260.873	3
11.35		514.733	336.085	3		42176.2	533.076	3							11.35		2528.55	432.039	4			11.35		33702.5	526	2		27682.8	3170.25	2			11.35		442.367	229.548	3
11.367		500.933	319.017	3		42190.8	501.641	3							11.367		2555.53	428.673	4			11.367		33691.4	539.25	2		27793	3195.75	2			11.367		461.067	240.456	3
11.383		533.833	353.919	3		42092.3	563.698	3							11.383		2641.07	419.089	4			11.383		33649.9	451.05	2		27759.2	3202.35	2			11.383		464.633	237.989	3
11.4		512.7	336.724	3		42218.2	500.056	3							11.4		2633.03	442.355	4			11.4		33613.3	528.5	2		27718.3	3251.25	2			11.4		384	227.611	3
11.417		538.867	366.077	3		42156	546.109	3							11.417		2598.38	449.449	4			11.417		33735.2	441.85	2		27754.8	3177.65	2			11.417		520.867	252.17	3
11.433		508.8	338.423	3		42204.1	489.565	3							11.433		2578.1	436.017	4			11.433		33649.4	517.6	2		27811.2	3225.45	2			11.433		448.267	213.275	3
11.45		516.933	346.219	3		42256.4	506.478	3							11.45		2613.32	438.103	4			11.45		33590.3	487.2	2		27723.2	3242.2	2			11.45		447	252.296	3
11.467		512.767	336.471	3		42216.3	533.825	3							11.467		2631.55	447.615	4			11.467		33621.4	450.85	2		27635.3	3153.5	2			11.467		383.6	278.756	3
11.483		511.9	351.217	3		42187.4	514.947	3							11.483		2675.62	462.389	4			11.483		33565.9	482.3	2		27695.2	3269.95	2			11.483		422.567	259.051	3
11.5		549.233	375.436	3		42145.4	475.135	3							11.5		2519.2	420.908	4			11.5		33617.5	495	2		27666.5	3222.95	2			11.5		499.367	286.367	3
11.517		496.433	326.009	3		42231	442.914	3							11.517		2664.35	434.993	4			11.517		33588.3	498.6	2		27711.5	3265	2			11.517		375.133	135.29	3
11.533		506.633	342.959	3		42244.9	453.201	3							11.533		2504.32	420.004	4			11.533		33602.3	528.85	2		27695.7	3214.95	2			11.533		450.1	196.76	3
11.55		541.3	367.973	3		42094.6	517.167	3							11.55		2685.53	441.184	4			11.55		33518.2	436.25	2		27666.5	3283.15	2			11.55		371.8	219.33	3
11.567		548	368.275	3		42168.6	532.03	3							11.567		2731.93	460.502	4			11.567		33521.3	408.25	2		27719.2	3282.85	2			11.567		390.5	267.435	3
11.583		563.9	387.875	3		42171.2	542.339	3							11.583		2659.2	457.088	4			11.583		33533.2	489.3	2		27614.7	3182.95	2			11.583		506.167	229.302	3
11.6		553.167	389.699	3		42140.2	537.546	3							11.6		2728.6	455.189	4			11.6		33653.8	502.65	2		27709.8	3216.1	2			11.6		582	217.29	3
11.617		552.667	375.593	3		42194.4	580.256	3							11.617		2562.97	452.986	4			11.617		33579.7	485.1	2		27737.6	3235	2			11.617		515.567	251.812	3
11.633		541.667	370.792	3		42204.6	581.206	3							11.633		2614.8	436.752	4			11.633		33557.4	503.1	2		27733.9	3270.7	2			11.633		497.133	226.661	3
11.65		540.8	370.048	3		42196.9	499.384	3							11.65		2609.93	473.117	4			11.65		33533.5	478.3	2		27767.4	3216.8	2			11.65		522.5	198.717	3
11.667		540.5	368.014	3		42204.4	522.559	3							11.667		2763.6	504.967	4			11.667		33526	478.5	2		27702.2	3177	2			11.667		459	194.016	3
11.683		549.8	378.255	3		42204.7	483.335	3							11.683		2718.12	446.583	4			11.683		33554.3	511.65	2		27759.5	3292.65	2			11.683		416.367	210.985	3
11.7		533.767	356.168	3		42259.1	541.164	3							11.7		2724.35	461.533	4			11.7		33587.7	412	2		27653	3208.45	2			11.7		469.5	260.888	3
11.717		553.533	379.779	3		42231	494.037	3							11.717		2681.93	432.082	4			11.717		33538.2	475	2		27660.2	3164.85	2			11.717		403.567	232.6	3
11.733		523.933	359.575	3		42061.2	614.235	3							11.733		2698.55	447.009	4			11.733		33556.4	453	2		27645.2	3148.35	2			11.733		490.4	135.104	3
11.75		565.533	380.666	3		42136.8	558.545	3							11.75		2736.25	466.172	4			11.75		33592.7	455.85	2		27785.3	3304.45	2			11.75		340.567	216.439	3
11.767		552.033	372.185	3		42190.1	505.681	3							11.767		2695.55	440.31	4			11.767		33538.3	429.1	2		27691.8	3234	2			11.767		409.7	194.344	3
11.783		552.667	390.144	3		42124.9	534.298	3							11.783		2840.97	441.396	4			11.783		33580.9	444.6	2		27657	3175.25	2			11.783		448.467	207.587	3
11.8		542.1	368.841	3		42204.4	487.895	3							11.8		2798.97	448.417	4			11.8		33602.8	472.75	2		27559.2	3192.8	2			11.8		450.467	204.418	3
11.817		566.267	405.469	3		42155.1	517.767	3							11.817		2808.4	441.939	4			11.817		33552.9	453.8	2		27648.8	3300.65	2			11.817		357.133	246.033	3
11.833		545.233	371.547	3		42209	524.875	3							11.833		2653.5	448.902	4			11.833		33472.2	464.5	2		27733.2	3243.25	2			11.833		524.433	194.842	3
11.85		549.967	384.133	3		42273.8	485.646	3							11.85		2853.03	466.131	4			11.85		33416.9	452.35	2		27735.2	3217.35	2			11.85		435.067	164.072	3
11.867		525.467	353.573	3		42262.9	526.088	3							11.867		2668.72	429.707	4			11.867		33542.9	486.15	2		27746.5	3303.45	2			11.867		438.533	235.921	3
11.883		546.133	375.616	3		42164.2	530.261	3							11.883		2686.88	476.01	4			11.883		33411.6	448.95	2		27699.8	3271.55	2			11.883		352.167	239.551	3
11.9		532.067	353.471	3		42209.8	551.857	3							11.9		2538.72	449.048	4			11.9		33500.2	478.25	2		27680.5	3450.05	2			11.9		427.633	210.777	3
11.917		559.7	369.508	3		42108.2	527.726	3							11.917		2853.07	478.743	4			11.917		33533.9	490.8	2		27645	3318.45	2			11.917		339.333	149.902	3
11.933		572.167	381.24	3		42201.3	504.554	3							11.933		2563.45	424.653	4			11.933		33301.1	410.6	2		27580	3233.95	2			11.933		446.667	189.367	3
11.95		554.967	378.49	3		42151.9	562.318	3							11.95		2667.1	449.077	4			11.95		33376.8	410.15	2		27506	3310.35	2			11.95		442.267	181.467	3
11.967		565.467	397.169	3		42190.4	557.395	3							11.967		2732.03	433.935	4			11.967		33375.3	388.95	2		27720.7	3256.55	2			11.967		439.7	194.785	3
11.983		534.533	357.937	3		42260.1	492.666	3							11.983		2698.55	449.867	4			11.983		33438.9	403.95	2		27481	3145.7	2			11.983		375.1	256.525	3
12		538.6	374.129	3		42184.1	520.077	3							12		2735.15	439.39	4			12		33486.8	443.5	2		27684.3	3285	2			12		455.933	166.535	3
12.017		524.633	357.318	3		42225.1	582.886	3							12.017		2741.22	465.961	4			12.017		33495.8	427.55	2		27622.3	3206.4	2			12.017		528.333	208.146	3
12.033		553.967	374.324	3		42383.7	504.157	3							12.033		2691.88	425.807	4			12.033		33465.4	454.15	2		27550.8	3245.25	2			12.033		433.133	218.496	3
12.05		539	367.215	3		42216.7	520.777	3							12.05		2497.55	453.257	4			12.05		33456.9	486.4	2		27671	3186.85	2			12.05		464.1	160.634	3
12.067		546.8	380.053	3		42224	516.563	3							12.067		2766.35	482.643	4			12.067		33440.4	449.3	2		27560	3236	2			12.067		470.867	184.629	3
12.083		535.467	356.117	3		42229.7	475.385	3							12.083		2662.18	446.864	4			12.083		33482.7	417.05	2		27620.3	3197.8	2			12.083		523.1	216.134	3
12.1		551.833	373.516	3		42221.7	489.31	3							12.1		2864.85	474.747	4			12.1		33359.2	267.95	2		27691	3086.45	2			12.1		480.2	230.066	3
12.117		531.033	357.199	3		42198.3	533.634	3							12.117		2743	447.2	4			12.117		33460.9	407.1	2		27839.6	3101.1	2			12.117		412.367	201.611	3
12.133		550.733	377.068	3		42222.4	479.421	3							12.133		2695.97	439.243	4			12.133		33265.4	339.6	2		27681.7	3244.55	2			12.133		385.667	191.361	3
12.15		529.833	359.327	3		42275.6	471.353	3							12.15		2741.38	466.749	4			12.15		33421.9	408.65	2		27669.5	3250.55	2			12.15		368.033	260.554	3
12.167		565.933	384.384	3		42280.8	529.422	3							12.167		2873.55	478.441	4			12.167		33310.2	390.5	2		27707.8	3222.05	2			12.167		419.633	148.185	3
12.183		539.833	367.428	3		42266.5	522.06	3							12.183		2741.45	455.334	4			12.183		33353.2	404.95	2		27616.9	3330.1	2			12.183		423.033	168.661	3
12.2		544.333	374.559	3		42274.9	474.063	3							12.2		2816	464.778	4			12.2		33345.9	476.4	2		27509	3266.55	2			12.2		409.667	196.379	3
12.217		542.067	366.577	3		42308.1	526.938	3							12.217		2831.65	445.357	4			12.217		33350.3	408.2	2		27589.2	3317.85	2			12.217		423.367	158.707	3
12.233		539.367	371.743	3		42196	514.439	3							12.233		2788.57	482.125	4			12.233		33306.3	396.85	2		27549.6	3373.5	2			12.233		340.7	189.543	3
12.25		519.567	336.597	3		42271.3	489.601	3							12.25		2821.8	462.571	4			12.25		33362.9	343.5	2		27463.8	3340.5	2			12.25		477.4	211.202	3
12.267		527.767	349.274	3		42381.7	449.602	3							12.267		2884.22	450.241	4			12.267		33320.7	463	2		27586.9	3241.7	2			12.267		574.967	196.77	3
12.283		525.033	365.028	3		42262	488.752	3							12.283		2816.3	432.223	4			12.283		33426.2	404	2		27529.3	3311.15	2			12.283		461.033	212.414	3
12.3		534.6	353.646	3		42336.1	489.667	3							12.3		2935.8	503.922	4			12.3		33382.1	351.95	2		27528.7	3157.85	2			12.3		401.7	195.61	3
12.317		520.367	354.823	3		42343.4	475.337	3							12.317		2771.47	443.575	4			12.317		33382.6	367.2	2		27501	3257.65	2			12.317		417.933	190.726	3
12.333		495.1	323.305	3		42314.8	487.259	3							12.333		2839.85	480.86	4			12.333		33365.5	347.8	2		27568.2	3260.05	2			12.333		388.467	183.454	3
12.35		512.6	327.165	3		42334.9	468.186	3							12.35		2749.2	429.574	4			12.35		33267.1	372.25	2		27566.8	3281	2			12.35		381.6	223.298	3
12.367		515.2	342.966	3		42348.7	461.022	3							12.367		2846.4	435.572	4			12.367		33299.2	372.15	2		27564.5	3216.45	2			12.367		468.833	237.538	3
12.383		511.233	345.617	3		42289.8	475.658	3							12.383		2892.25	452.703	4			12.383		33304.3	372.9	2		27463	3192.8	2			12.383		412.633	206.196	3
12.4		533.7	361.292	3		42350.7	446.799	3							12.4		2848.6	448.557	4			12.4		33307.9	379.75	2		27429.5	3263.85	2			12.4		458.033	181.08	3
12.417		503.267	330.57	3		42278.7	456.971	3							12.417		2761.93	454.258	4			12.417		33296.8	388.95	2		27609.7	3273.45	2			12.417		503.1	190.082	3
12.433		518.167	360.457	3		42378.4	512.097	3							12.433		2903.85	453.041	4			12.433		33342	402.2	2		27579.8	3246.75	2			12.433		530.633	228.217	3
12.45		524.033	344.832	3		42286	465.556	3							12.45		2958.68	495.817	4			12.45		33366.9	346.65	2		27657.1	3258.4	2			12.45		585.933	217.153	3
12.467		500.333	320.279	3		42358.1	450.389	3							12.467		2889.88	477.347	4			12.467		33230.4	357.05	2		27584.5	3299.95	2			12.467		460.2	205.905	3
12.483		510.4	332.307	3		42384.1	481.13	3							12.483		2890.3	500.464	4			12.483		33266.9	409.25	2		27472.5	3205.4	2			12.483		408.333	249.83	3
12.5		537.367	360.236	3		42369.5	470.702	3							12.5		2884.5	489.288	4			12.5		33265	440	2		27411	3330.65	2			12.5		437.267	316.098	3
12.517		529.867	351.512	3		42365.1	457.732	3							12.517		2842.07	465.803	4			12.517		33257.2	343.9	2		27474.5	3286	2			12.517		330.267	164.873	3
12.533		535.6	364.078	3		42448.8	477.987	3							12.533		2925.15	484.9	4			12.533		33187.1	197.65	2		27597.3	3284.9	2			12.533		353.533	253.241	3
12.55		529.167	353.62	3		42361.2	457.421	3							12.55		2720.4	439.467	4			12.55		33242.2	388.15	2		27740.6	2966.4	2			12.55		520.767	171.018	3
12.567		513.2	333.651	3		42328	536.865	3							12.567		2922.4	453.407	4			12.567		33222.4	342.35	2		28032.6	2870.1	2			12.567		431.4	251.992	3
12.583		533.767	362.223	3		42308.8	547.365	3							12.583		2835.6	438.597	4			12.583		33170.7	243.25	2		27751.2	3014.8	2			12.583		411.867	81.3482	3
12.6		550.533	379.723	3		42341.8	502.597	3							12.6		3010.55	470.645	4			12.6		33222.9	358.2	2		27591.7	3329.8	2			12.6		517.467	144.899	3
12.617		521.533	347.977	3		42268	556.683	3							12.617		2984.07	471.65	4			12.617		33267.8	345.5	2		27558.2	3236.15	2			12.617		369.5	240.068	3
12.633		519.267	351.346	3		42341.3	459.318	3							12.633		2909.9	450.592	4			12.633		33179.1	292.75	2		27539	3264.5	2			12.633		452.233	240.431	3
12.65		500.067	326.835	3		42290.8	576.383	3							12.65		2914.1	462.303	4			12.65		33255.1	369.45	2		27574.8	3279.45	2			12.65		421.667	199.877	3
12.667		531.2	354.359	3		42377.3	489.218	3							12.667		2939.35	442.262	4			12.667		33273.1	410.15	2		27515.4	3396	2			12.667		417.1	209.899	3
12.683		542.933	366.948	3		42283.6	625.212	3							12.683		2779.1	457.815	4			12.683		33164.9	389.8	2		27379.2	3177.2	2			12.683		410.733	173.18	3
12.7		550.133	359.063	3		42392.5	495.712	3							12.7		2962.7	470.048	4			12.7		33180.6	353.7	2		27484.3	3228.15	2			12.7		472.333	218.887	3
12.717		529.767	366.106	3		42401.4	523.56	3							12.717		2681.75	436.196	4			12.717		33189.6	399.9	2		27518.2	3189.15	2			12.717		400.967	201.522	3
12.733		522.767	344.217	3		42343.2	489.917	3							12.733		2879.12	454.023	4			12.733		33098.2	301.8	2		27380	3296.6	2			12.733		445.567	196.656	3
12.75		526.133	359.817	3		42372.2	470.372	3							12.75		2892.1	507.626	4			12.75		33183.1	428.35	2		27515.8	3264.2	2			12.75		392.167	164.083	3
12.767		533.833	336.23	3		42442.8	482.062	3							12.767		2886.65	450.783	4			12.767		33260.7	392.15	2		27569.5	3309.25	2			12.767		366	213.677	3
12.783		519.333	357.006	3		42274	576.262	3							12.783		2854.4	462.852	4			12.783		33103.4	335.2	2		27488.8	3302.45	2			12.783		411.2	273.783	3
12.8		545.533	381.319	3		42344.6	488.917	3							12.8		2739.97	432.659	4			12.8		33166.2	344	2		27496	3347.05	2			12.8		507	212.197	3
12.817		515.633	338.657	3		42247.3	573.646	3							12.817		2834.65	459.75	4			12.817		33247.2	311.45	2		27527	3250.2	2			12.817		563.167	122.169	3
12.833		522.967	342.716	3		42296.7	533.678	3							12.833		2945.68	461.143	4			12.833		33163.8	354.45	2		27510.7	3226.9	2			12.833		458.4	153.211	3
12.85		544.667	360.261	3		42311.2	545.465	3							12.85		2788.38	492.839	4			12.85		33022.2	361.55	2		27483.3	3202.8	2			12.85		475.7	210.574	3
12.867		547.2	366.151	3		42267.8	550.766	3							12.867		2776.1	520.538	4			12.867		33237.1	373.2	2		27540.3	3301.85	2			12.867		418.733	193.305	3
12.883		511.067	330.286	3		42330.9	559.021	3							12.883		3016.47	452.796	4			12.883		33184.1	295.05	2		27560.7	3277	2			12.883		444.233	177.536	3
12.9		523.433	337.093	3		42337.3	541.253	3							12.9		2739.55	456.306	4			12.9		33185.6	323	2		27453.2	3302.55	2			12.9		397.5	177.845	3
12.917		540.2	357.658	3		42436.8	470.584	3							12.917		2964.9	449.279	4			12.917		33138	320	2		27441.2	3181.55	2			12.917		282.667	144.717	3
12.933		540.567	363.451	3		42314.1	595.177	3							12.933		2904.22	444.607	4			12.933		33124.2	293.45	2		27522.4	3316.9	2			12.933		421.067	214.961	3
12.95		541	365.195	3		42382.4	488.461	3							12.95		2831.55	504.895	4			12.95		33225.6	294.45	2		27426.9	3213.2	2			12.95		504.467	208.581	3
12.967		526.2	334.415	3		42307.1	542.619	3							12.967		2814.43	460.848	4			12.967		33105.2	320.55	2		27374.5	3298.05	2			12.967		414.6	178.202	3
12.983		515.867	339.197	3		42370.3	525.471	3							12.983		2884.5	473.384	4			12.983		33167.3	270.5	2		27397.6	3237.7	2			12.983		383.067	252.964	3
13		511.467	343.184	3		42393.1	460.366	3							13		2871.8	442.753	4			13		33187.7	253.85	2		27443.5	3220.75	2			13		553.1	203.078	3
13.017		530.4	356.33	3		42365.4	476.364	3							13.017		2916.9	450.128	4			13.017		33065.7	298.35	2		27580.2	3315.3	2			13.017		314.867	216.127	3
13.033		538.5	358.414	3		42369.1	522.962	3							13.033		3055.65	478.794	4			13.033		33177.6	347.45	2		27394.8	3235.15	2			13.033		479.767	211.208	3
13.05		529.133	347.882	3		42266.8	555.026	3							13.05		2912.25	452.089	4			13.05		33165.3	329.95	2		27452.3	3339.15	2			13.05		370.4	163.391	3
13.067		543.533	360.605	3		42331.6	513.184	3							13.067		2985.65	485.567	4			13.067		33156.6	384.45	2		27394.5	3304.25	2			13.067		485.667	116.535	3
13.083		525.767	368.991	3		42392.3	505.018	3							13.083		2848.85	441.006	4			13.083		33133.1	346.45	2		27352	3254.75	2			13.083		513.933	177.212	3
13.1		535.133	367.844	3		42390.8	523.96	3							13.1		2986.75	511.51	4			13.1		32989.1	291.2	2		27465.5	3300.6	2			13.1		457.133	260.508	3
13.117		540.333	364.328	3		42276.7	532.078	3							13.117		2981.68	443.279	4			13.117		32982.4	346	2		27445.8	3155.8	2			13.117		417.033	189.598	3
13.133		526.633	344.668	3		42341.5	567.337	3							13.133		2857.3	485	4			13.133		33078.1	349.9	2		27411.5	3370.65	2			13.133		494	159.798	3
13.15		533.1	347.886	3		42375	492.825	3							13.15		3040.35	461.145	4			13.15		32987.6	267.6	2		27521.6	3249.1	2			13.15		408.067	170.12	3
13.167		543.933	361.403	3		42376.7	610.66	3							13.167		2868.45	472.612	4			13.167		32996.2	281.55	2		27394	3378.85	2			13.167		400.967	138.132	3
13.183		532.067	361.538	3		42321.5	553.207	3							13.183		2896.75	459.811	4			13.183		33050.3	326.8	2		27445.2	3231.65	2			13.183		467.367	175.829	3
13.2		510.6	339.225	3		42382.2	532.609	3							13.2		3018.78	454.876	4			13.2		33037.3	341.3	2		27388	3317.95	2			13.2		458.467	211.225	3
13.217		533.5	357.634	3		42397.3	501.071	3							13.217		2974.35	473.755	4			13.217		32936.6	286.8	2		27498.1	3277.9	2			13.217		471.733	207.238	3
13.233		514.5	343.381	3		42409	489.722	3							13.233		3031.1	480.342	4			13.233		32914.1	350.85	2		27405.9	3283.1	2			13.233		469.567	218.497	3
13.25		542.533	352.521	3		42378	539.178	3							13.25		2931.2	491.672	4			13.25		32957.9	290.85	2		27430	3310.45	2			13.25		509.733	212.648	3
13.267		532.333	355.415	3		42457.2	511.193	3							13.267		3175.32	490.173	4			13.267		33034.1	319	2		27387.9	3275.8	2			13.267		471.4	258.704	3
13.283		547.067	371.011	3		42291.4	568.805	3							13.283		2924.9	468.097	4			13.283		33078.4	298	2		27410	3250.75	2			13.283		439.4	287.938	3
13.3		552.733	375.984	3		42419	488.179	3							13.3		3076.38	465.734	4			13.3		32947.4	292.45	2		27444.8	3291.85	2			13.3		340.467	167.133	3
13.317		552.467	379.472	3		42392.2	449.766	3							13.317		2982.15	457.272	4			13.317		33031.7	289.2	2		27329.1	3146.9	2			13.317		446.4	172.268	3
13.333		555.533	367.535	3		42380.1	514.761	3							13.333		2993.15	473.429	4			13.333		33053.2	300.75	2		27361	3220.85	2			13.333		418.1	178.298	3
13.35		551.567	371.442	3		42359.2	498.09	3							13.35		3057.05	487.829	4			13.35		32988.8	226.35	2		27365.2	3375.45	2			13.35		324.2	169.755	3
13.367		547.033	368.056	3		42356.4	492.563	3							13.367		2925.28	478.994	4			13.367		32990.2	213.75	2		27360.3	3211.9	2			13.367		437.1	223.994	3
13.383		538.167	372.126	3		42454.9	444.871	3							13.383		3121.43	509.604	4			13.383		33026.9	285.6	2		27376.8	3191.4	2			13.383		396.7	121.882	3
13.4		571.833	379.507	3		42441.9	481.739	3							13.4		3016.62	485.17	4			13.4		32924.9	199.6	2		27348.5	3169.65	2			13.4		375.667	245.993	3
13.417		541.933	369.293	3		42440.1	529.733	3							13.417		3006.53	477.082	4			13.417		32952.8	275.9	2		27252.5	3225.15	2			13.417		429.033	190.515	3
13.433		548.167	371.369	3		42366.4	560.356	3							13.433		3168.85	470.266	4			13.433		32991.9	234.6	2		27377.9	3256.8	2			13.433		360.967	236.33	3
13.45		532.433	348.555	3		42461	520.981	3							13.45		2954.97	482.607	4			13.45		32900.6	268.05	2		27341.2	3223.3	2			13.45		460.8	212.179	3
13.467		538.233	369.53	3		42415.3	454.56	3							13.467		2962.5	460.009	4			13.467		32859.1	320.6	2		27476	3288.65	2			13.467		467.567	178.848	3
13.483		561.467	379.564	3		42378.2	542.334	3							13.483		2968.7	459.493	4			13.483		32896.8	298.15	2		27473.2	3299.65	2			13.483		465.1	208.5	3
13.5		525.4	344.076	3		42502.9	553.454	3							13.5		3005.95	474.624	4			13.5		32946.6	241.65	2		27354.2	3324.75	2			13.5		429.133	207.504	3
13.517		534.233	352.507	3		42483.9	510.044	3							13.517		3093.65	478.776	4			13.517		32901	286.2	2		27363	3304.15	2			13.517		388.3	229.256	3
13.533		533.533	364.299	3		42481.3	493.864	3							13.533		2790.32	443.871	4			13.533		32894.9	223.55	2		27398.5	3267.55	2			13.533		517.267	181.175	3
13.55		565.433	377.571	3		42411.3	496.061	3							13.55		3092.07	461.621	4			13.55		32908.8	249.4	2		27365.8	3265.25	2			13.55		308.133	194.842	3
13.567		548.8	367.632	3		42516.4	524.166	3							13.567		2982.32	483.745	4			13.567		32947.5	320.2	2		27292.8	3177.9	2			13.567		366.033	226.76	3
13.583		526.033	348.238	3		42470	477.771	3							13.583		3024.75	469.312	4			13.583		32979.6	310.85	2		27311	3236.25	2			13.583		327.367	197.292	3
13.6		540.933	353.794	3		42426.6	534.312	3							13.6		2939.85	498.069	4			13.6		32904.2	203.45	2		27366	3227.05	2			13.6		381.333	159.636	3
13.617		531.2	356.635	3		42391.8	503.118	3							13.617		2875.85	477.349	4			13.617		32901.1	341.85	2		27394.5	3210.65	2			13.617		433.7	141.518	3
13.633		503.133	334.796	3		42421.6	540.947	3							13.633		2994.82	460.361	4			13.633		32923.8	269.45	2		27321.8	3217.35	2			13.633		362.033	185.579	3
13.65		554.333	369.153	3		42452.8	557.167	3							13.65		2960.97	459.072	4			13.65		33036.4	317.65	2		27355.3	3270.8	2			13.65		421.333	226.249	3
13.667		526.3	351.683	3		42463	461.633	3							13.667		3030.05	513.023	4			13.667		32899.4	354.9	2		27179	3208.6	2			13.667		430.933	165.747	3
13.683		531.933	366.339	3		42433.9	454.134	3							13.683		2948	454.694	4			13.683		32918.9	267.65	2		27246	3115.25	2			13.683		314.633	168.588	3
13.7		539.733	341.137	3		42523.8	500.596	3							13.7		3108.6	513.903	4			13.7		32983.2	318.35	2		27321.8	3338.55	2			13.7		354.433	96.4745	3
13.717		553.467	374.165	3		42446.9	569.129	3							13.717		2924.6	514.917	4			13.717		32939.4	317.85	2		27307.4	3193.7	2			13.717		429.3	183.254	3
13.733		572.3	392.849	3		42551	442.983	3							13.733		3005.5	478.167	4			13.733		32826.1	324.75	2		27256.8	3228.45	2			13.733		276.867	231.258	3
13.75		528.533	349.739	3		42547.6	421.654	3							13.75		3041.22	484.767	4			13.75		32848.9	318.25	2		27330	3258.55	2			13.75		378.633	214.233	3
13.767		552.633	385.131	3		42504.8	466.829	3							13.767		2844.12	453.078	4			13.767		32848.9	369.85	2		27256.4	3161.8	2			13.767		377.533	185.352	3
13.783		549.5	374.134	3		42434.4	477.245	3							13.783		3080.85	492.448	4			13.783		32904.1	263.2	2		27324.7	3378.8	2			13.783		465.167	165.805	3
13.8		538.267	376.137	3		42489.9	465.428	3							13.8		2946.28	528.44	4			13.8		32691.5	319.1	2		27290.7	3308.05	2			13.8		373.5	187.828	3
13.817		569	383.992	3		42493.8	505.404	3							13.817		3045.75	487.095	4			13.817		32914.5	296.5	2		27241	3258.25	2			13.817		402.6	210.091	3
13.833		551.367	377.409	3		42476.9	467.854	3							13.833		2823.62	455.105	4			13.833		32834.5	295.7	2		27189.8	3427.35	2			13.833		353.267	193.968	3
13.85		573.1	403.604	3		42514.9	521.257	3							13.85		3006.85	457.4	4			13.85		32932.6	276.85	2		27323.8	3305.65	2			13.85		345.867	239.197	3
13.867		563.933	387.395	3		42516.7	492.934	3							13.867		2903.15	458.811	4			13.867		32830.8	335.75	2		27297.7	3340.2	2			13.867		348.933	299.962	3
13.883		561.3	370.134	3		42516.4	481.954	3							13.883		3116.1	466.498	4			13.883		32780.9	286.25	2		27292	3307	2			13.883		352.567	251.05	3
13.9		536.567	357.514	3		42474	541.589	3							13.9		3064	491.092	4			13.9		32845.2	285.8	2		27234.5	3338.35	2			13.9		397.167	227.434	3
13.917		539.733	354.475	3		42618.9	501.494	3							13.917		3087.07	482.759	4			13.917		32814.8	206.55	2		27325.2	3451.95	2			13.917		382.9	168.736	3
13.933		556.133	383.317	3		42610.4	475.288	3							13.933		3097.72	500.486	4			13.933		32847.2	327.25	2		27286	3282.65	2			13.933		393.5	251.443	3
13.95		534.767	358.305	3		42529.5	500.099	3							13.95		2955.65	459.748	4			13.95		32902.5	280.1	2		27274.8	3371.8	2			13.95		424.4	260.77	3
13.967		532.367	363.17	3		42527.7	525.522	3							13.967		3021.15	540.135	4			13.967		32876.3	291.9	2		27251.2	3320.9	2			13.967		326.933	179.357	3
13.983		545.767	374.29	3		42491.6	527.617	3							13.983		3007	461.878	4			13.983		32966	271.8	2		27277	3319.75	2			13.983		452.9	199.145	3
14		557.333	394.957	3		42535.5	475.998	3							14		2889.65	445.032	4			14		32928.2	212.9	2		27218.3	3278.85	2			14		369.767	249.033	3
14.017		560.2	378.89	3		42524.8	530.056	3							14.017		2963.12	481.064	4			14.017		32788.4	215.4	2		27236.5	3260.6	2			14.017		445.067	225.353	3
14.033		534.667	363.973	3		42491.9	502.874	3							14.033		2994.43	451.917	4			14.033		32842.8	201.05	2		27203	3316.9	2			14.033		392.3	189.698	3
14.05		548.933	368.443	3		42533.6	516.108	3							14.05		3128.45	485.592	4			14.05		32835.2	286.2	2		27257.2	3193.75	2			14.05		345.7	269.793	3
14.067		536.2	356.891	3		42518.1	510.039	3							14.067		3071.68	449.003	4			14.067		32803.8	286.55	2		27142	3165.5	2			14.067		435.633	253.048	3
14.083		542	357.578	3		42574.4	533.476	3							14.083		3155.22	479.439	4			14.083		32807.7	309.8	2		27190.5	3357.95	2			14.083		407.233	159.69	3
14.1		546.4	370.483	3		42476.7	563.895	3							14.1		3002.22	470.446	4			14.1		32717.9	320.5	2		27248.4	3292.8	2			14.1		580.55	281.75	2
14.117		559.6	378.122	3		42533	555.398	3							14.117		3029.82	460.217	4			14.117		32621.5	275.35	2		27190.4	3262.1	2			14.117		512.35	263.55	2
14.133		534.467	362.871	3		42589.9	512.091	3							14.133		3056.35	472.1	4			14.133		32701.9	201.4	2		27344.8	3346.75	2			14.133		408.3	281.3	2
14.15		536.733	373.832	3		42517.2	478.591	3							14.15		2867.32	450.605	4			14.15		32699.2	236.55	2		27149.8	3309.75	2			14.15		433.15	192.65	2
14.167		554.533	368.187	3		42572.7	510.325	3							14.167		3019.95	458.752	4			14.167		32776.6	367.7	2		27236.7	3238.45	2			14.167		434.35	234.45	2
14.183		543.033	372.661	3		42529.2	503.94	3							14.183		3108	471.737	4			14.183		32759.5	281	2		27184.3	3316.15	2			14.183		557.65	381.95	2
14.2		520.767	346.472	3		42525.1	531.708	3							14.2		2985.68	444.188	4			14.2		32678.5	253.25	2		27193.8	3266.55	2			14.2		430.15	140.25	2
14.217		564.567	388.254	3		42551.8	466.742	3							14.217		3151.88	465.947	4			14.217		32728	339.85	2		27188.8	3313.3	2			14.217		481.15	245.65	2
14.233		537.1	358.991	3		42483.6	546.165	3							14.233		3065.72	465.137	4			14.233		32808.2	323.65	2		27129.2	3388.2	2			14.233		369.45	321.45	2
14.25		553.4	372.984	3		42564.8	519.836	3							14.25		2928.62	444.433	4			14.25		32789.3	357.4	2		27207.8	3354.55	2			14.25		527.95	309.55	2
14.267		550.8	379.362	3		42505.4	507.604	3							14.267		3167.85	453.681	4			14.267		32765.4	252	2		27155.4	3369.1	2			14.267		394.5	292.1	2
14.283		563.867	392.809	3		42597.3	406.131	3							14.283		3004.75	473.285	4			14.283		32790.9	210.35	2		27135	3336.15	2			14.283		433.1	380	2
14.3		582.033	398.597	3		42570.6	444.037	3							14.3		2965.88	487.145	4			14.3		32840.8	335.45	2		27236	3277.9	2			14.3		450.65	332.65	2
14.317		567.033	394.952	3		42530.6	511.549	3							14.317		3006.53	457.867	4			14.317		32718.8	250.7	2		27112.5	3302.1	2			14.317		455.3	349.8	2
14.333		537.233	370.448	3		42586.4	483.879	3							14.333		3053.05	489.634	4			14.333		32778.2	284.6	2		27203.3	3257.4	2			14.333		465.7	277.6	2
14.35		553.8	384.548	3		42519.7	537.211	3							14.35		3027.15	463.354	4			14.35		32780.8	335	2		27199.8	3253.3	2			14.35		209		1
14.367		593.567	403.846	3		42557.1	481.413	3							14.367		3070.75	445.744	4			14.367		32742.1	214.6	2		27094.9	3283.3	2			14.367		228.3		1
14.383		531.867	359.72	3		42513.2	494.964	3							14.383		2893.57	451.099	4			14.383		32757	255.55	2		27146.3	3326.9	2			14.383		76.6		1
14.4		537.567	348.278	3		42492.5	548.184	3							14.4		2916.68	433.32	4			14.4		32660.3	332.6	2		27249.1	3320.2	2			14.4		247.4		1
14.417		548.467	378.941	3		42559.1	510.361	3							14.417		2969.15	442.972	4			14.417		32724.8	248.45	2		27224.9	3304	2			14.417		216.4		1
14.433		555.933	365.172	3		42510.6	610.53	3							14.433		3028.95	449.69	4			14.433		32745.2	289.45	2		27180.7	3159.85	2			14.433		127.1		1
14.45		566.067	385.432	3		42523.9	539.34	3							14.45		3012.97	468.245	4			14.45		32731	195.65	2		27244.5	3191.75	2			14.45		154.8		1
14.467		551.333	383.567	3		42474.2	596.778	3							14.467		3012.7	495.698	4			14.467		32695	255.7	2		27096.8	3356.75	2			14.467		396		1
14.483		569.267	389.417	3		42488.5	604.026	3							14.483		2995.6	444.526	4			14.483		32698.1	260.9	2		27153.3	3322.6	2			14.483		315.6		1
14.5		564.4	377.719	3		42553.4	570.109	3							14.5		2928.97	450.748	4			14.5		32586.4	174.9	2		27103.2	3277.85	2			14.5		107.7		1
14.517		556.533	364.344	3		42581.2	536.539	3							14.517		3015.38	453.919	4			14.517		32589.8	242.05	2		27089.5	3269.25	2			14.517		68		1
14.533		562.6	377.501	3		42486.7	524.533	3							14.533		3038.57	446.318	4			14.533		32573.1	111.4	2		27120	3221.3	2			14.533		161.7		1
14.55		566.033	387.615	3		42490.1	586.891	3							14.55		3071	459.809	4			14.55		32657.9	190.7	2		27161.6	3264.8	2			14.55		133.5		1
14.567		553.1	373.525	3		42457.8	611.778	3							14.567		3047.9	441.861	4			14.567		32720.3	207.35	2		27115	3181.25	2			14.567		279.2		1
14.583		591.733	404.613	3		42465.3	603.278	3							14.583		2996.47	480.39	4			14.583		32652.8	176.4	2		27037.5	3208.05	2			14.583		223.2		1
14.6		566.533	386.774	3		42511.8	552.857	3							14.6		3021.57	474.641	4			14.6		32785.3	191.35	2		27172	3204.45	2			14.6		122.6		1
14.617		566.633	373.944	3		42487.2	449.72	3							14.617		3116.55	462.5	4			14.617		32716.7	217.45	2		27163.4	3166.1	2			14.617		203.9		1
14.633		563.4	380.537	3		42512.5	502.751	3							14.633		3030.82	451.144	4			14.633		32706.1	200.4	2		27223.5	3172.15	2			14.633		92.4		1
14.65		565.4	382.389	3		42473.4	511.693	3							14.65		2999.25	468.038	4			14.65		32671.5	176.45	2		27048.5	3198.75	2			14.65		159.5		1
14.667		560.867	387.117	3		42527.6	520.075	3							14.667		2893.82	441.51	4			14.667		32695.5	213.75	2		27123.7	3194.95	2			14.667		43.5		1
14.683		562.267	389.528	3		42449.3	499.077	3							14.683		3099.7	451.774	4			14.683		32673.2	265.45	2		27120	3110.9	2			14.683		191.5		1
14.7		589.9	396.435	3		42447.2	515.984	3							14.7		3078.82	418.67	4			14.7		32654.8	311.05	2		27101.2	3145.65	2			14.7		294.1		1
14.717		570.1	387.312	3		42515.2	516.147	3							14.717		3037.38	422.528	4			14.717		32661	227.25	2		27083.8	3158.7	2			14.717		187		1
14.733		563.633	389.915	3		42463.5	578.309	3							14.733		3154.97	464.266	4			14.733		32592.7	183.8	2		27129.6	3225.9	2			14.733		108.2		1
14.75		568.2	382.824	3		42533.8	497.067	3							14.75		3073.25	423.373	4			14.75		32522.8	178	2		27066.3	3284.85	2			14.75		95.5		1
14.767		575.167	394.527	3		42442	494.848	3							14.767		3072.05	403.843	4			14.767		32615.8	247.4	2		27141.8	3202.5	2			14.767		89.9		1
14.783		584.4	392.591	3		42403.7	530.1	3							14.783		3137.43	411.257	4			14.783		32695	271.25	2		27131.5	3266.3	2			14.783		131		1
14.8		561.9	378.868	3		42489.4	492.113	3							14.8		3060.65	414.763	4			14.8		32586.3	185.5	2		27249.5	3283.05	2			14.8		105.9		1
14.817		576.333	391.898	3		42484.7	583.378	3							14.817		3039.2	416.772	4			14.817		32722.7	219.3	2		27102.2	3296.15	2			14.817		119.9		1
14.833		579.333	396.173	3		42557.7	614.809	3							14.833		3077.45	477.659	4			14.833		32608	257.95	2		27013.2	3182.95	2			14.833		251		1
14.85		573.333	388.238	3		42461.1	617.293	3							14.85		3187.62	436.147	4			14.85		32688.5	203.2	2		26915.7	3209.45	2			14.85		112		1
14.867		575.233	401.982	3		42487.7	531.647	3							14.867		3175.88	398.703	4			14.867		32679.5	224.55	2		27185.7	3318.4	2			14.867		105.7		1
14.883		549.867	385.358	3		42436.1	562.49	3							14.883		2995.43	434.698	4			14.883		32689.5	197.05	2		27118	3203.15	2			14.883		225.4		1
14.9		590.5	402.499	3		42463.1	598.708	3							14.9		3077.22	397.36	4			14.9		32617	238.25	2		27027.4	3328	2			14.9		182.1		1
14.917		561.2	380.599	3		42480.6	538.728	3							14.917		3200.22	388.873	4			14.917		32645.7	236.4	2		27071.5	3266.9	2			14.917		33.3		1
14.933		568.167	379.78	3		42424.2	509.57	3							14.933		3133.8	439.192	4			14.933		32627.8	195.55	2		26987	3203.25	2			14.933		2.5		1
14.95		589.633	400.616	3		42467.9	534.141	3							14.95		2940.47	389.212	4			14.95		32633	234	2		27113.5	3342.95	2			14.95		40.9		1
14.967		579.433	412.647	3		42455.6	531.941	3							14.967		3164.7	430.578	4			14.967		32621.5	213.75	2		27107.5	3211.55	2			14.967		107.5		1
14.983		600.233	421.773	3		42482.9	572.503	3							14.983		3188	423.828	4			14.983		32572.8	139.7	2		27061.6	3223.8	2			14.983		205.5		1
15		596.767	412.131	3		42447.2	515.148	3							15		3199.88	448.674	4			15		32678	164.05	2		27037.8	3217.6	2			15		173.2		1

## Sheet: Fig 2-fig supplement 3
Figure 2-figure supplement 3 (A)																															Figure 2-figure supplement 3 (B)
		Buffer				nsDNA				ParB				ParB-3R				ParB-4R				ParB-7R				ParB-nsDNA							Buffer				nsDNA				ParB				ParB-7R				ParB-nsDNA
Time(min)		Mean	SEM	n		Mean	SEM	n		Mean	SEM	n		Mean	SEM	n		Mean	SEM	n		Mean	SEM	n		Mean	SEM	n			Time(min)		Mean	SEM	n		Mean	SEM	n		Mean	SEM	n		Mean	SEM	n		Mean
0		1	0	2		1	0	2		1	0	2		1	0	2		1	0	2		1	0	2		1	0	2			0		1	0	2		1	0	2		1	0	2		1	0	2		1
0.017		0.9975	0.0015	2		0.9925	0.0015	2		0.9945	0.0005	2		0.991	0	2		0.9935	0.0035	2		0.9965	0.0015	2		0.983	0.012	2			0.017		0.9885	0.0005	2		0.99	0.005	2		0.996	0	2		0.989	0.005	2		0.991
0.033		0.992	0.004	2		0.995	0.001	2		0.99	0.009	2		0.981	0.002	2		0.9945	0.0005	2		0.9935	0.0005	2		0.9795	0.0155	2			0.033		0.949	0.039	2		0.988	0.009	2		0.9875	0.0015	2		0.9925	0.0145	2		0.991
0.05		0.9905	0.0065	2		0.993	0	2		0.9795	0.0135	2		0.9785	0.0035	2		0.9915	0.0005	2		0.9915	0.0005	2		0.9775	0.0185	2			0.05		0.943	0.042	2		0.9795	0.0185	2		0.992	0	2		0.968	0.018	2		0.995
0.067		0.98	0.001	2		0.9885	0.0035	2		0.9715	0.0095	2		0.9715	0.0025	2		0.9875	0.0045	2		0.99	0.001	2		0.975	0.021	2			0.067		0.9425	0.0415	2		0.9535	0.0415	2		0.98	0.001	2		0.96	0.023	2		0.97
0.083		0.9765	0.0015	2		0.9945	0.0015	2		0.9655	0.0085	2		0.971	0.003	2		0.9905	0.0015	2		0.9885	0.0025	2		0.975	0.02	2			0.083		0.937	0.042	2		0.9345	0.0615	2		0.9735	0.0015	2		0.956	0.031	2		0.957
0.1		0.974	0.003	2		0.9895	0.0045	2		0.9625	0.0125	2		0.9695	0.0025	2		0.985	0.001	2		0.9845	0.0015	2		0.972	0.025	2			0.1		0.933	0.04	2		0.928	0.068	2		0.9675	0.0015	2		0.95	0.035	2		0.9475
0.117		0.97	0.004	2		0.982	0.001	2		0.958	0.013	2		0.9685	0.0015	2		0.9825	0.0035	2		0.9825	0.0005	2		0.972	0.026	2			0.117		0.93	0.043	2		0.921	0.074	2		0.959	0.002	2		0.9475	0.0405	2		0.9445
0.133		0.9675	0.0045	2		0.98	0.001	2		0.951	0.014	2		0.9645	0.0005	2		0.98	0.003	2		0.981	0	2		0.968	0.026	2			0.133		0.9235	0.0445	2		0.9155	0.0795	2		0.9505	0.0025	2		0.943	0.043	2		0.9365
0.15		0.9645	0.0065	2		0.982	0.003	2		0.9505	0.0145	2		0.9625	0.0005	2		0.982	0.001	2		0.9805	0.0015	2		0.967	0.031	2			0.15		0.9175	0.0425	2		0.9135	0.0865	2		0.936	0.003	2		0.944	0.054	2		0.9315
0.167		0.965	0.003	2		0.9775	0.0005	2		0.9465	0.0145	2		0.9595	0.0015	2		0.978	0.002	2		0.98	0.002	2		0.966	0.029	2			0.167		0.912	0.039	2		0.911	0.085	2		0.9285	0.0035	2		0.936	0.051	2		0.926
0.183		0.963	0.003	2		0.976	0.001	2		0.9455	0.0165	2		0.959	0.001	2		0.975	0.001	2		0.976	0.001	2		0.9635	0.0305	2			0.183		0.911	0.038	2		0.9065	0.0895	2		0.914	0.004	2		0.931	0.052	2		0.924
0.2		0.961	0.004	2		0.9735	0.0005	2		0.9405	0.0195	2		0.9545	0.0015	2		0.973	0.002	2		0.9745	0.0015	2		0.9645	0.0315	2			0.2		0.9045	0.0395	2		0.9075	0.0915	2		0.908	0.004	2		0.93	0.054	2		0.9245
0.217		0.96	0.005	2		0.972	0.004	2		0.9385	0.0205	2		0.9565	0.0015	2		0.972	0.001	2		0.972	0.002	2		0.961	0.031	2			0.217		0.906	0.036	2		0.908	0.091	2		0.8985	0.0045	2		0.9305	0.0605	2		0.921
0.233		0.959	0.006	2		0.973	0.005	2		0.936	0.021	2		0.954	0.002	2		0.9735	0.0025	2		0.971	0.002	2		0.9605	0.0335	2			0.233		0.901	0.036	2		0.8535	0.0455	2		0.897	0.005	2		0.9395	0.0605	2		0.921
0.25		0.958	0.004	2		0.971	0.004	2		0.934	0.023	2		0.952	0.003	2		0.9695	0.0025	2		0.968	0.001	2		0.9615	0.0335	2			0.25		0.896	0.034	2		0.8345	0.0325	2		0.8835	0.0055	2		0.921	0.063	2		0.924
0.267		0.957	0.004	2		0.969	0.008	2		0.9345	0.0255	2		0.953	0.002	2		0.9705	0.0035	2		0.966	0.002	2		0.961	0.036	2			0.267		0.8915	0.0325	2		0.821	0.019	2		0.8745	0.0055	2		0.9185	0.0595	2		0.909
0.283		0.9535	0.0055	2		0.9665	0.0025	2		0.931	0.027	2		0.953	0.002	2		0.9645	0.0005	2		0.9645	0.0015	2		0.9585	0.0325	2			0.283		0.891	0.032	2		0.813	0.011	2		0.8705	0.0055	2		0.92	0.066	2		0.899
0.3		0.955	0.005	2		0.9685	0.0045	2		0.929	0.028	2		0.945	0.004	2		0.966	0.004	2		0.962	0.002	2		0.94	0.017	2			0.3		0.8885	0.0325	2		0.809	0.008	2		0.8675	0.0065	2		0.9185	0.0695	2		0.882
0.317		0.9535	0.0045	2		0.968	0.005	2		0.924	0.028	2		0.9475	0.0035	2		0.966	0.004	2		0.9615	0.0005	2		0.938	0.015	2			0.317		0.8865	0.0325	2		0.802	0.006	2		0.8605	0.0065	2		0.9105	0.0615	2		0.867
0.333		0.9525	0.0035	2		0.9675	0.0065	2		0.925	0.03	2		0.9455	0.0045	2		0.9645	0.0065	2		0.9615	0.0005	2		0.9355	0.0135	2			0.333		0.887	0.033	2		0.798	0.006	2		0.854	0.007	2		0.9115	0.0675	2		0.8595
0.35		0.949	0.003	2		0.962	0.003	2		0.9215	0.0295	2		0.9455	0.0035	2		0.9585	0.0035	2		0.9585	0.0015	2		0.9345	0.0145	2			0.35		0.877	0.033	2		0.797	0.004	2		0.855	0.007	2		0.913	0.074	2		0.854
0.367		0.951	0.007	2		0.9585	0.0045	2		0.92	0.031	2		0.9445	0.0055	2		0.9585	0.0005	2		0.9565	0.0015	2		0.933	0.012	2			0.367		0.877	0.034	2		0.79	0.002	2		0.846	0.007	2		0.913	0.077	2		0.843
0.383		0.9495	0.0045	2		0.9575	0.0025	2		0.919	0.033	2		0.94	0.006	2		0.955	0	2		0.9575	0.0025	2		0.9305	0.0145	2			0.383		0.8755	0.0345	2		0.789	0.002	2		0.8435	0.0075	2		0.9085	0.0745	2		0.838
0.4		0.9495	0.0045	2		0.9575	0.0065	2		0.9155	0.0335	2		0.9385	0.0065	2		0.956	0.004	2		0.9545	0.0005	2		0.9255	0.0105	2			0.4		0.872	0.031	2		0.782	0.003	2		0.846	0.007	2		0.907	0.077	2		0.8305
0.417		0.946	0.006	2		0.9555	0.0045	2		0.9155	0.0345	2		0.9395	0.0075	2		0.9525	0.0025	2		0.953	0	2		0.9245	0.0115	2			0.417		0.873	0.035	2		0.78	0.004	2		0.8365	0.0075	2		0.9005	0.0705	2		0.8285
0.433		0.9465	0.0045	2		0.952	0.004	2		0.9135	0.0335	2		0.939	0.007	2		0.9495	0.0015	2		0.952	0.001	2		0.9255	0.0115	2			0.433		0.865	0.034	2		0.7755	0.0015	2		0.8495	0.0075	2		0.9215	0.0795	2		0.826
0.45		0.9455	0.0055	2		0.953	0.004	2		0.912	0.035	2		0.938	0.007	2		0.9485	0.0045	2		0.952	0.001	2		0.9205	0.0105	2			0.45		0.867	0.03	2		0.775	0.002	2		0.8385	0.0075	2		0.905	0.083	2		0.8335
0.467		0.945	0.004	2		0.946	0.004	2		0.91	0.036	2		0.936	0.008	2		0.9455	0.0005	2		0.948	0.001	2		0.9185	0.0095	2			0.467		0.866	0.031	2		0.771	0.004	2		0.8325	0.0075	2		0.8945	0.0745	2		0.8195
0.483		0.9415	0.0035	2		0.945	0.005	2		0.907	0.038	2		0.9345	0.0085	2		0.943	0.001	2		0.944	0.001	2		0.918	0.009	2			0.483		0.8645	0.0295	2		0.774	0.003	2		0.8315	0.0075	2		0.8655	0.0485	2		0.814
0.5		0.9425	0.0035	2		0.9405	0.0025	2		0.909	0.04	2		0.936	0.008	2		0.9405	0.0035	2		0.9425	0.0025	2		0.919	0.01	2			0.5		0.864	0.029	2		0.772	0.002	2		0.8325	0.0075	2		0.848	0.033	2		0.818
0.517		0.9425	0.0045	2		0.943	0.006	2		0.9075	0.0385	2		0.935	0.009	2		0.9425	0.0005	2		0.9425	0.0005	2		0.9125	0.0075	2			0.517		0.8605	0.0265	2		0.7705	0.0025	2		0.825	0.008	2		0.836	0.021	2		0.8095
0.533		0.9415	0.0045	2		0.9355	0.0025	2		0.906	0.039	2		0.9315	0.0095	2		0.9365	0.0055	2		0.942	0.001	2		0.9115	0.0075	2			0.533		0.8605	0.0285	2		0.771	0.002	2		0.83	0.008	2		0.835	0.019	2		0.807
0.55		0.941	0.006	2		0.9355	0.0045	2		0.903	0.041	2		0.931	0.009	2		0.9375	0.0045	2		0.9405	0.0025	2		0.9135	0.0085	2			0.55		0.8575	0.0265	2		0.7655	0.0035	2		0.826	0.008	2		0.825	0.014	2		0.8035
0.567		0.9395	0.0045	2		0.937	0.005	2		0.9035	0.0405	2		0.9305	0.0085	2		0.9365	0.0015	2		0.9375	0.0015	2		0.91	0.009	2			0.567		0.8585	0.0265	2		0.7635	0.0025	2		0.826	0.008	2		0.822	0.014	2		0.8005
0.583		0.9415	0.0045	2		0.934	0.004	2		0.9025	0.0415	2		0.931	0.01	2		0.933	0.002	2		0.9385	0.0005	2		0.91	0.008	2			0.583		0.8575	0.0265	2		0.7645	0.0025	2		0.825	0.01	2		0.8145	0.0065	2		0.8005
0.6		0.939	0.003	2		0.9335	0.0055	2		0.8975	0.0435	2		0.929	0.01	2		0.933	0.001	2		0.9375	0.0005	2		0.908	0.009	2			0.6		0.858	0.026	2		0.764	0.004	2		0.824	0.008	2		0.8125	0.0075	2		0.8
0.617		0.9385	0.0045	2		0.928	0.003	2		0.8985	0.0425	2		0.928	0.011	2		0.9285	0.0045	2		0.936	0.001	2		0.9065	0.0075	2			0.617		0.856	0.024	2		0.762	0.004	2		0.822	0.008	2		0.81	0.003	2		0.7945
0.633		0.937	0.005	2		0.9275	0.0035	2		0.898	0.045	2		0.9235	0.0115	2		0.9275	0.0035	2		0.933	0.001	2		0.904	0.007	2			0.633		0.8535	0.0255	2		0.7625	0.0025	2		0.831	0.008	2		0.8165	0.0035	2		0.7935
0.65		0.9375	0.0025	2		0.925	0.002	2		0.8945	0.0465	2		0.927	0.012	2		0.9245	0.0055	2		0.933	0.003	2		0.9035	0.0065	2			0.65		0.8495	0.0265	2		0.7575	0.0015	2		0.8225	0.0085	2		0.796	0.007	2		0.8025
0.667		0.9365	0.0035	2		0.9255	0.0025	2		0.895	0.046	2		0.9265	0.0115	2		0.923	0.003	2		0.928	0.003	2		0.9045	0.0065	2			0.667		0.853	0.025	2		0.757	0.006	2		0.8205	0.0085	2		0.8	0.002	2		0.791
0.683		0.9375	0.0025	2		0.922	0.001	2		0.8955	0.0475	2		0.9255	0.0115	2		0.9195	0.0045	2		0.9265	0.0025	2		0.9035	0.0075	2			0.683		0.853	0.026	2		0.7555	0.0045	2		0.8185	0.0085	2		0.7985	0.0045	2		0.788
0.7		0.9325	0.0015	2		0.923	0.003	2		0.893	0.048	2		0.924	0.012	2		0.922	0.004	2		0.929	0.002	2		0.902	0.007	2			0.7		0.8475	0.0225	2		0.7535	0.0045	2		0.8195	0.0085	2		0.792	0.008	2		0.7875
0.717		0.9345	0.0025	2		0.9165	0.0005	2		0.894	0.047	2		0.9215	0.0125	2		0.9145	0.0075	2		0.9285	0.0005	2		0.904	0.007	2			0.717		0.8455	0.0275	2		0.753	0.003	2		0.8175	0.0085	2		0.792	0.008	2		0.785
0.733		0.9335	0.0045	2		0.916	0	2		0.8945	0.0475	2		0.9225	0.0125	2		0.9155	0.0085	2		0.927	0.002	2		0.901	0.006	2			0.733		0.848	0.026	2		0.753	0.006	2		0.8225	0.0085	2		0.797	0.001	2		0.785
0.75		0.934	0.004	2		0.9145	0.0015	2		0.8915	0.0475	2		0.9225	0.0125	2		0.913	0.009	2		0.924	0.004	2		0.9005	0.0065	2			0.75		0.8465	0.0285	2		0.753	0.003	2		0.8185	0.0085	2		0.788	0.01	2		0.786
0.767		0.9325	0.0015	2		0.914	0	2		0.89	0.049	2		0.922	0.013	2		0.9125	0.0085	2		0.9225	0.0025	2		0.8985	0.0065	2			0.767		0.847	0.026	2		0.754	0.001	2		0.8165	0.0085	2		0.787	0.007	2		0.7815
0.783		0.933	0	2		0.912	0	2		0.8875	0.0485	2		0.9225	0.0125	2		0.9115	0.0095	2		0.9215	0.0045	2		0.9	0.008	2			0.783		0.8435	0.0255	2		0.754	0.006	2		0.8135	0.0085	2		0.786	0.009	2		0.783
0.8		0.932	0.002	2		0.9095	0.0005	2		0.887	0.05	2		0.918	0.014	2		0.9075	0.0085	2		0.9215	0.0045	2		0.899	0.01	2			0.8		0.8425	0.0275	2		0.7515	0.0015	2		0.8155	0.0085	2		0.7825	0.0085	2		0.78
0.817		0.932	0.003	2		0.9095	0.0015	2		0.886	0.052	2		0.9185	0.0145	2		0.9085	0.0075	2		0.9185	0.0025	2		0.8965	0.0055	2			0.817		0.842	0.027	2		0.7505	0.0035	2		0.812	0.009	2		0.785	0.007	2		0.7815
0.833		0.9295	0.0035	2		0.912	0.004	2		0.885	0.052	2		0.9175	0.0145	2		0.912	0.005	2		0.916	0.003	2		0.895	0.009	2			0.833		0.8425	0.0245	2		0.749	0.004	2		0.819	0.009	2		0.796	0.009	2		0.784
0.85		0.929	0.004	2		0.911	0.004	2		0.884	0.053	2		0.917	0.014	2		0.911	0.005	2		0.915	0.005	2		0.8945	0.0075	2			0.85		0.8405	0.0245	2		0.7475	0.0065	2		0.81	0.009	2		0.782	0.006	2		0.793
0.867		0.93	0.003	2		0.9055	0.0005	2		0.883	0.053	2		0.916	0.015	2		0.9035	0.0095	2		0.9165	0.0015	2		0.8935	0.0075	2			0.867		0.8395	0.0255	2		0.7475	0.0055	2		0.8125	0.0085	2		0.781	0.007	2		0.783
0.883		0.927	0.002	2		0.906	0.001	2		0.882	0.054	2		0.915	0.014	2		0.905	0.008	2		0.914	0.002	2		0.891	0.006	2			0.883		0.8375	0.0265	2		0.7465	0.0055	2		0.8125	0.0085	2		0.776	0.01	2		0.777
0.9		0.9275	0.0035	2		0.9045	0.0015	2		0.882	0.054	2		0.914	0.015	2		0.9005	0.0085	2		0.9155	0.0035	2		0.891	0.007	2			0.9		0.84	0.024	2		0.741	0.007	2		0.8125	0.0085	2		0.7725	0.0115	2		0.776
0.917		0.928	0.004	2		0.9025	0.0025	2		0.881	0.054	2		0.916	0.016	2		0.9005	0.0115	2		0.912	0.002	2		0.888	0.007	2			0.917		0.837	0.024	2		0.7445	0.0045	2		0.8075	0.0085	2		0.767	0.017	2		0.7735
0.933		0.9265	0.0025	2		0.9035	0.0025	2		0.8815	0.0565	2		0.914	0.016	2		0.902	0.007	2		0.912	0.003	2		0.8885	0.0065	2			0.933		0.8385	0.0265	2		0.7435	0.0055	2		0.8105	0.0085	2		0.768	0.014	2		0.774
0.95		0.926	0.004	2		0.899	0.004	2		0.882	0.056	2		0.9135	0.0155	2		0.894	0.01	2		0.911	0.005	2		0.889	0.008	2			0.95		0.8365	0.0225	2		0.74	0.007	2		0.809	0.009	2		0.772	0.009	2		0.773
0.967		0.9255	0.0045	2		0.901	0.003	2		0.88	0.058	2		0.9125	0.0165	2		0.896	0.01	2		0.9085	0.0025	2		0.8885	0.0065	2			0.967		0.8345	0.0215	2		0.7425	0.0055	2		0.8105	0.0085	2		0.7645	0.0145	2		0.773
0.983		0.9245	0.0045	2		0.8985	0.0035	2		0.876	0.058	2		0.9105	0.0165	2		0.894	0.011	2		0.908	0.003	2		0.8875	0.0075	2			0.983		0.8345	0.0245	2		0.7425	0.0035	2		0.8105	0.0085	2		0.7685	0.0115	2		0.773
1		0.923	0.004	2		0.8945	0.0045	2		0.875	0.059	2		0.9085	0.0165	2		0.89	0.012	2		0.9065	0.0045	2		0.888	0.006	2			1		0.8355	0.0255	2		0.74	0.003	2		0.807	0.009	2		0.7605	0.0185	2		0.771
1.017		0.9225	0.0025	2		0.895	0.005	2		0.876	0.059	2		0.9095	0.0165	2		0.888	0.011	2		0.9055	0.0035	2		0.8865	0.0065	2			1.017		0.835	0.024	2		0.7425	0.0015	2		0.804	0.009	2		0.7595	0.0185	2		0.772
1.033		0.9245	0.0035	2		0.895	0.004	2		0.8755	0.0595	2		0.9095	0.0165	2		0.8905	0.0115	2		0.9045	0.0035	2		0.886	0.007	2			1.033		0.8355	0.0235	2		0.7365	0.0045	2		0.807	0.009	2		0.7745	0.0195	2		0.7725
1.05		0.9225	0.0045	2		0.894	0.002	2		0.8735	0.0615	2		0.9085	0.0175	2		0.89	0.01	2		0.9035	0.0015	2		0.8855	0.0095	2			1.05		0.8325	0.0275	2		0.7395	0.0035	2		0.808	0.009	2		0.757	0.017	2		0.786
1.067		0.9225	0.0035	2		0.892	0.006	2		0.874	0.062	2		0.9095	0.0175	2		0.885	0.012	2		0.9005	0.0025	2		0.8845	0.0055	2			1.067		0.8295	0.0245	2		0.738	0.006	2		0.809	0.009	2		0.7545	0.0195	2		0.774
1.083		0.923	0.004	2		0.8895	0.0055	2		0.8715	0.0575	2		0.9075	0.0175	2		0.8845	0.0135	2		0.9005	0.0065	2		0.884	0.008	2			1.083		0.8305	0.0225	2		0.7375	0.0045	2		0.805	0.009	2		0.759	0.012	2		0.775
1.1		0.921	0.004	2		0.888	0.006	2		0.872	0.063	2		0.909	0.016	2		0.884	0.015	2		0.9015	0.0075	2		0.8815	0.0085	2			1.1		0.83	0.025	2		0.7385	0.0025	2		0.805	0.009	2		0.7555	0.0165	2		0.7725
1.117		0.9215	0.0045	2		0.887	0.007	2		0.871	0.061	2		0.91	0.017	2		0.8805	0.0135	2		0.8985	0.0035	2		0.881	0.007	2			1.117		0.829	0.027	2		0.7335	0.0015	2		0.806	0.009	2		0.758	0.013	2		0.768
1.133		0.92	0.007	2		0.8845	0.0075	2		0.8705	0.0595	2		0.908	0.017	2		0.878	0.015	2		0.8995	0.0045	2		0.8775	0.0055	2			1.133		0.8285	0.0275	2		0.734	0	2		0.807	0.009	2		0.756	0.014	2		0.767
1.15		0.918	0.002	2		0.884	0.009	2		0.8725	0.0625	2		0.9075	0.0175	2		0.8775	0.0165	2		0.896	0.004	2		0.878	0.006	2			1.15		0.827	0.025	2		0.7355	0.0035	2		0.8015	0.0095	2		0.7505	0.0145	2		0.769
1.167		0.919	0.005	2		0.8825	0.0085	2		0.87	0.06	2		0.904	0.017	2		0.8765	0.0165	2		0.8945	0.0035	2		0.8755	0.0065	2			1.167		0.8285	0.0235	2		0.7325	0.0015	2		0.804	0.009	2		0.755	0.012	2		0.7645
1.183		0.9195	0.0035	2		0.8775	0.0115	2		0.8705	0.0625	2		0.906	0.017	2		0.871	0.02	2		0.8945	0.0035	2		0.8725	0.0035	2			1.183		0.833	0.02	2		0.7355	0.0005	2		0.804	0.009	2		0.7525	0.0155	2		0.7635
1.2		0.919	0.005	2		0.876	0.012	2		0.87	0.061	2		0.9055	0.0175	2		0.8695	0.0205	2		0.8935	0.0055	2		0.8725	0.0055	2			1.2		0.8285	0.0215	2		0.7375	0.0005	2		0.806	0.009	2		0.752	0.012	2		0.7645
1.217		0.9165	0.0015	2		0.8795	0.0105	2		0.8715	0.0615	2		0.9025	0.0175	2		0.871	0.016	2		0.892	0.005	2		0.8735	0.0055	2			1.217		0.827	0.022	2		0.7325	0.0005	2		0.804	0.009	2		0.7565	0.0095	2		0.7635
1.233		0.918	0.004	2		0.8755	0.0115	2		0.871	0.063	2		0.904	0.019	2		0.867	0.018	2		0.8905	0.0045	2		0.872	0.005	2			1.233		0.825	0.025	2		0.733	0.001	2		0.807	0.009	2		0.765	0.013	2		0.7625
1.25		0.918	0.003	2		0.881	0.009	2		0.8705	0.0595	2		0.9045	0.0175	2		0.8715	0.0135	2		0.8915	0.0065	2		0.875	0.009	2			1.25		0.827	0.022	2		0.732	0.001	2		0.801	0.009	2		0.7455	0.0135	2		0.775
1.267		0.915	0.004	2		0.873	0.014	2		0.867	0.06	2		0.9035	0.0175	2		0.862	0.018	2		0.889	0.006	2		0.8735	0.0055	2			1.267		0.8225	0.0205	2		0.731	0.001	2		0.805	0.009	2		0.747	0.013	2		0.764
1.283		0.9155	0.0065	2		0.876	0.012	2		0.8695	0.0615	2		0.8995	0.0185	2		0.865	0.016	2		0.8885	0.0075	2		0.872	0.004	2			1.283		0.826	0.024	2		0.733	0.006	2		0.804	0.009	2		0.7435	0.0165	2		0.7625
1.3		0.9155	0.0045	2		0.871	0.014	2		0.866	0.06	2		0.8985	0.0185	2		0.8605	0.0195	2		0.8845	0.0045	2		0.8695	0.0045	2			1.3		0.8275	0.0205	2		0.7295	0.0005	2		0.804	0.009	2		0.744	0.016	2		0.762
1.317		0.916	0.005	2		0.8745	0.0105	2		0.869	0.062	2		0.902	0.019	2		0.863	0.014	2		0.884	0.007	2		0.8705	0.0075	2			1.317		0.825	0.024	2		0.7295	0.0005	2		0.805	0.009	2		0.743	0.016	2		0.7615
1.333		0.914	0.004	2		0.873	0.012	2		0.8705	0.0625	2		0.903	0.019	2		0.862	0.016	2		0.884	0.008	2		0.8675	0.0075	2			1.333		0.832	0.025	2		0.7235	0.0025	2		0.807	0.009	2		0.747	0.013	2		0.7595
1.35		0.915	0.003	2		0.87	0.014	2		0.8685	0.0625	2		0.9015	0.0185	2		0.859	0.019	2		0.8825	0.0075	2		0.87	0.003	2			1.35		0.828	0.02	2		0.7255	0.0005	2		0.802	0.009	2		0.743	0.012	2		0.76
1.367		0.9135	0.0035	2		0.8675	0.0145	2		0.8655	0.0605	2		0.9015	0.0175	2		0.853	0.017	2		0.884	0.008	2		0.8675	0.0025	2			1.367		0.827	0.019	2		0.7265	0.0025	2		0.803	0.009	2		0.7425	0.0115	2		0.7565
1.383		0.9145	0.0005	2		0.8695	0.0145	2		0.869	0.062	2		0.9005	0.0175	2		0.855	0.016	2		0.883	0.006	2		0.867	0.008	2			1.383		0.8225	0.0215	2		0.7235	0.0005	2		0.802	0.009	2		0.744	0.012	2		0.7565
1.4		0.915	0	2		0.8665	0.0155	2		0.87	0.063	2		0.8985	0.0185	2		0.854	0.02	2		0.8815	0.0065	2		0.864	0.005	2			1.4		0.822	0.021	2		0.726	0	2		0.804	0.009	2		0.743	0.012	2		0.756
1.417		0.9135	0.0015	2		0.868	0.014	2		0.8685	0.0635	2		0.899	0.018	2		0.854	0.016	2		0.882	0.007	2		0.864	0.004	2			1.417		0.823	0.019	2		0.728	0.001	2		0.802	0.009	2		0.7415	0.0125	2		0.7535
1.433		0.912	0.003	2		0.8655	0.0145	2		0.8695	0.0615	2		0.9	0.017	2		0.8515	0.0175	2		0.8805	0.0075	2		0.864	0.007	2			1.433		0.8215	0.0195	2		0.73	0	2		0.7975	0.0095	2		0.7565	0.0115	2		0.7515
1.45		0.914	0.002	2		0.8595	0.0165	2		0.8665	0.0605	2		0.8995	0.0175	2		0.8465	0.0215	2		0.878	0.008	2		0.859	0.004	2			1.45		0.8245	0.0205	2		0.724	0.004	2		0.8	0.009	2		0.7475	0.0055	2		0.764
1.467		0.9105	0.0025	2		0.8595	0.0185	2		0.866	0.063	2		0.9	0.018	2		0.843	0.02	2		0.8765	0.0075	2		0.8615	0.0035	2			1.467		0.8215	0.0215	2		0.7225	0.0045	2		0.7975	0.0095	2		0.74	0.011	2		0.753
1.483		0.9115	0.0035	2		0.8565	0.0185	2		0.866	0.06	2		0.895	0.018	2		0.8435	0.0235	2		0.8755	0.0075	2		0.8605	0.0045	2			1.483		0.823	0.019	2		0.7265	0.0025	2		0.8	0.009	2		0.742	0.009	2		0.7545
1.5		0.9075	0.0055	2		0.8535	0.0225	2		0.867	0.064	2		0.8985	0.0175	2		0.8405	0.0285	2		0.874	0.008	2		0.8615	0.0045	2			1.5		0.819	0.021	2		0.7245	0.0005	2		0.7955	0.0095	2		0.746	0.005	2		0.752
1.517		0.911	0.003	2		0.855	0.02	2		0.867	0.063	2		0.8955	0.0185	2		0.842	0.025	2		0.8725	0.0075	2		0.859	0.005	2			1.517		0.8245	0.0225	2		0.7235	0.0005	2		0.8	0.009	2		0.743	0.006	2		0.751
1.533		0.9055	0.0045	2		0.8525	0.0235	2		0.8635	0.0625	2		0.896	0.018	2		0.8355	0.0255	2		0.872	0.009	2		0.859	0.003	2			1.533		0.8195	0.0245	2		0.721	0.002	2		0.7955	0.0095	2		0.7435	0.0065	2		0.7495
1.55		0.9105	0.0015	2		0.851	0.021	2		0.866	0.063	2		0.8955	0.0185	2		0.8365	0.0255	2		0.87	0.008	2		0.857	0.002	2			1.55		0.82	0.024	2		0.722	0.002	2		0.801	0.009	2		0.742	0.005	2		0.7505
1.567		0.909	0.002	2		0.851	0.022	2		0.865	0.062	2		0.896	0.018	2		0.836	0.026	2		0.871	0.01	2		0.855	0.006	2			1.567		0.8265	0.0175	2		0.7245	0.0005	2		0.799	0.009	2		0.7415	0.0045	2		0.7465
1.583		0.9085	0.0015	2		0.851	0.023	2		0.8665	0.0605	2		0.8925	0.0195	2		0.8325	0.0235	2		0.8705	0.0075	2		0.857	0.004	2			1.583		0.8215	0.0175	2		0.72	0.001	2		0.8	0.009	2		0.738	0.009	2		0.749
1.6		0.906	0.001	2		0.85	0.023	2		0.866	0.061	2		0.8965	0.0175	2		0.832	0.025	2		0.87	0.008	2		0.8545	0.0035	2			1.6		0.82	0.02	2		0.7195	0.0005	2		0.7985	0.0085	2		0.746	0.001	2		0.748
1.617		0.9085	0.0015	2		0.85	0.025	2		0.8635	0.0595	2		0.8925	0.0185	2		0.8305	0.0245	2		0.8685	0.0105	2		0.8565	0.0035	2			1.617		0.8215	0.0225	2		0.717	0.002	2		0.804	0.009	2		0.735	0.009	2		0.7455
1.633		0.911	0.002	2		0.851	0.022	2		0.8645	0.0585	2		0.8935	0.0175	2		0.8315	0.0215	2		0.8675	0.0105	2		0.854	0.007	2			1.633		0.8165	0.0225	2		0.718	0.001	2		0.801	0.009	2		0.739	0.006	2		0.7475
1.65		0.907	0.003	2		0.8495	0.0225	2		0.862	0.06	2		0.894	0.017	2		0.831	0.023	2		0.865	0.009	2		0.853	0.006	2			1.65		0.8185	0.0225	2		0.7195	0.0015	2		0.802	0.009	2		0.7375	0.0055	2		0.7475
1.667		0.9065	0.0035	2		0.8485	0.0235	2		0.865	0.059	2		0.8925	0.0185	2		0.826	0.02	2		0.865	0.013	2		0.8515	0.0075	2			1.667		0.819	0.023	2		0.72	0.002	2		0.803	0.009	2		0.7365	0.0045	2		0.745
1.683		0.907	0.001	2		0.8465	0.0235	2		0.863	0.059	2		0.8935	0.0175	2		0.826	0.023	2		0.8645	0.0085	2		0.8515	0.0065	2			1.683		0.818	0.022	2		0.716	0.001	2		0.8025	0.0085	2		0.73	0.01	2		0.7445
1.7		0.908	0.003	2		0.8435	0.0255	2		0.863	0.06	2		0.8915	0.0185	2		0.8215	0.0235	2		0.863	0.012	2		0.851	0.004	2			1.7		0.8195	0.0195	2		0.7155	0.0025	2		0.7965	0.0095	2		0.731	0.008	2		0.7505
1.717		0.9085	0.0025	2		0.8425	0.0255	2		0.861	0.059	2		0.8915	0.0185	2		0.821	0.025	2		0.862	0.012	2		0.852	0.004	2			1.717		0.8155	0.0185	2		0.7165	0.0025	2		0.799	0.009	2		0.7305	0.0105	2		0.7435
1.733		0.908	0.002	2		0.838	0.026	2		0.864	0.059	2		0.8915	0.0175	2		0.8175	0.0265	2		0.861	0.013	2		0.8505	0.0035	2			1.733		0.817	0.022	2		0.716	0.001	2		0.7965	0.0095	2		0.7375	0.0025	2		0.743
1.75		0.907	0.002	2		0.8415	0.0255	2		0.862	0.058	2		0.893	0.017	2		0.82	0.024	2		0.859	0.011	2		0.8485	0.0045	2			1.75		0.814	0.021	2		0.716	0.004	2		0.7955	0.0095	2		0.73	0.008	2		0.7455
1.767		0.9045	0.0035	2		0.837	0.028	2		0.861	0.058	2		0.8925	0.0165	2		0.8155	0.0275	2		0.858	0.012	2		0.85	0.004	2			1.767		0.819	0.023	2		0.719	0	2		0.7975	0.0095	2		0.7335	0.0035	2		0.744
1.783		0.9035	0.0035	2		0.837	0.028	2		0.861	0.059	2		0.8905	0.0175	2		0.813	0.025	2		0.859	0.015	2		0.846	0.005	2			1.783		0.814	0.026	2		0.719	0.001	2		0.7945	0.0095	2		0.7265	0.0095	2		0.7415
1.8		0.904	0.001	2		0.8355	0.0295	2		0.86	0.058	2		0.893	0.017	2		0.8115	0.0275	2		0.857	0.014	2		0.849	0.005	2			1.8		0.8185	0.0215	2		0.717	0.003	2		0.799	0.009	2		0.73	0.006	2		0.7415
1.817		0.905	0.002	2		0.835	0.029	2		0.8615	0.0595	2		0.8885	0.0175	2		0.8105	0.0255	2		0.8555	0.0135	2		0.847	0.003	2			1.817		0.8165	0.0215	2		0.718	0.002	2		0.7935	0.0095	2		0.725	0.011	2		0.7415
1.833		0.9055	0.0035	2		0.8345	0.0295	2		0.861	0.059	2		0.886	0.019	2		0.8095	0.0265	2		0.854	0.012	2		0.847	0.002	2			1.833		0.815	0.021	2		0.7175	0.0035	2		0.7975	0.0095	2		0.733	0.004	2		0.7415
1.85		0.9035	0.0015	2		0.833	0.03	2		0.8605	0.0575	2		0.888	0.019	2		0.808	0.027	2		0.852	0.013	2		0.845	0.002	2			1.85		0.8165	0.0195	2		0.7165	0.0005	2		0.7955	0.0095	2		0.729	0.008	2		0.74
1.867		0.903	0.002	2		0.836	0.029	2		0.861	0.058	2		0.8905	0.0185	2		0.809	0.023	2		0.8515	0.0165	2		0.8435	0.0035	2			1.867		0.812	0.023	2		0.716	0	2		0.7965	0.0095	2		0.731	0.003	2		0.741
1.883		0.9045	0.0005	2		0.8355	0.0295	2		0.8615	0.0585	2		0.8895	0.0175	2		0.809	0.024	2		0.851	0.014	2		0.8415	0.0045	2			1.883		0.815	0.022	2		0.7165	0.0055	2		0.7975	0.0095	2		0.7335	0.0005	2		0.7365
1.9		0.9005	0.0015	2		0.83	0.031	2		0.859	0.056	2		0.8875	0.0185	2		0.8045	0.0275	2		0.849	0.014	2		0.8405	0.0045	2			1.9		0.8145	0.0235	2		0.7145	0.0045	2		0.7935	0.0095	2		0.7275	0.0035	2		0.7395
1.917		0.9025	0.0015	2		0.8325	0.0295	2		0.8595	0.0575	2		0.888	0.018	2		0.805	0.024	2		0.85	0.016	2		0.8405	0.0045	2			1.917		0.814	0.019	2		0.7135	0.0005	2		0.7945	0.0095	2		0.727	0.005	2		0.74
1.933		0.902	0.002	2		0.829	0.029	2		0.8565	0.0565	2		0.8855	0.0185	2		0.8025	0.0245	2		0.8485	0.0175	2		0.8415	0.0055	2			1.933		0.8145	0.0215	2		0.7095	0.0015	2		0.7945	0.0095	2		0.7285	0.0035	2		0.739
1.95		0.9035	0.0005	2		0.829	0.032	2		0.86	0.057	2		0.888	0.019	2		0.7995	0.0255	2		0.849	0.016	2		0.8415	0.0055	2			1.95		0.8115	0.0225	2		0.711	0	2		0.7935	0.0095	2		0.73	0.001	2		0.741
1.967		0.9025	0.0005	2		0.8295	0.0295	2		0.8585	0.0565	2		0.887	0.019	2		0.8	0.022	2		0.8455	0.0185	2		0.838	0.003	2			1.967		0.8115	0.0205	2		0.7125	0.0015	2		0.806	0.009	2		0.727	0.002	2		0.7445
1.983		0.902	0.003	2		0.8265	0.0315	2		0.8605	0.0565	2		0.884	0.019	2		0.797	0.024	2		0.843	0.022	2		0.839	0.004	2			1.983		0.813	0.02	2		0.71	0.003	2		0.803	0.009	2		0.73	0.001	2		0.7385
2		0.8995	0.0015	2		0.8225	0.0315	2		0.8585	0.0545	2		0.8865	0.0175	2		0.7935	0.0255	2		0.8455	0.0185	2		0.8375	0.0035	2			2		0.8115	0.0215	2		0.7105	0.0005	2		0.7945	0.0095	2		0.726	0.003	2		0.7395
2.017		0.8995	0.0015	2		0.827	0.034	2		0.8565	0.0565	2		0.886	0.017	2		0.7955	0.0255	2		0.8445	0.0165	2		0.835	0.002	2			2.017		0.812	0.021	2		0.7105	0.0015	2		0.7945	0.0095	2		0.7225	0.0065	2		0.739
2.033		0.898	0.002	2		0.822	0.034	2		0.8575	0.0555	2		0.8835	0.0185	2		0.791	0.027	2		0.844	0.02	2		0.834	0.004	2			2.033		0.8075	0.0245	2		0.7095	0.0035	2		0.7955	0.0095	2		0.733	0.005	2		0.7395
2.05		0.901	0.003	2		0.82	0.035	2		0.857	0.056	2		0.885	0.018	2		0.789	0.028	2		0.841	0.02	2		0.835	0.006	2			2.05		0.8075	0.0225	2		0.713	0.002	2		0.7965	0.0095	2		0.7265	0.0015	2		0.7385
2.067		0.8995	0.0015	2		0.8205	0.0335	2		0.855	0.055	2		0.883	0.018	2		0.7895	0.0255	2		0.8375	0.0215	2		0.8345	0.0045	2			2.067		0.808	0.02	2		0.7245	0.0125	2		0.7975	0.0095	2		0.7285	0.0005	2		0.738
2.083		0.8955	0.0045	2		0.8195	0.0335	2		0.8545	0.0545	2		0.8795	0.0185	2		0.7885	0.0255	2		0.838	0.021	2		0.831	0.003	2			2.083		0.807	0.021	2		0.722	0.007	2		0.799	0.009	2		0.725	0	2		0.7355
2.1		0.897	0.002	2		0.82	0.033	2		0.857	0.053	2		0.8835	0.0175	2		0.7885	0.0255	2		0.8395	0.0215	2		0.832	0.003	2			2.1		0.807	0.02	2		0.711	0.003	2		0.7975	0.0095	2		0.7265	0.0005	2		0.7375
2.117		0.899	0.002	2		0.818	0.037	2		0.8545	0.0545	2		0.8815	0.0185	2		0.783	0.027	2		0.838	0.022	2		0.831	0.002	2			2.117		0.806	0.02	2		0.7115	0.0045	2		0.7975	0.0095	2		0.724	0	2		0.736
2.133		0.8985	0.0025	2		0.819	0.036	2		0.8565	0.0555	2		0.8805	0.0185	2		0.7825	0.0235	2		0.8335	0.0215	2		0.8305	0.0005	2			2.133		0.8085	0.0225	2		0.711	0.003	2		0.798	0.01	2		0.7245	0.0005	2		0.7375
2.15		0.898	0.002	2		0.816	0.037	2		0.8525	0.0525	2		0.8805	0.0185	2		0.781	0.026	2		0.8325	0.0185	2		0.8305	0.0005	2			2.15		0.8055	0.0205	2		0.7115	0.0035	2		0.8	0.009	2		0.728	0.004	2		0.741
2.167		0.899	0.001	2		0.816	0.038	2		0.855	0.055	2		0.882	0.018	2		0.7795	0.0255	2		0.831	0.021	2		0.831	0.001	2			2.167		0.8035	0.0235	2		0.711	0.007	2		0.801	0.009	2		0.753	0.029	2		0.74
2.183		0.896	0.002	2		0.8145	0.0365	2		0.853	0.053	2		0.8815	0.0175	2		0.7775	0.0245	2		0.832	0.021	2		0.83	0	2			2.183		0.804	0.021	2		0.712	0.001	2		0.8	0.009	2		0.735	0.013	2		0.737
2.2		0.8955	0.0025	2		0.816	0.036	2		0.852	0.054	2		0.882	0.018	2		0.776	0.021	2		0.8325	0.0225	2		0.8265	0.0005	2			2.2		0.802	0.023	2		0.711	0.004	2		0.802	0.009	2		0.7255	0.0065	2		0.739
2.217		0.8975	0.0015	2		0.8145	0.0385	2		0.851	0.054	2		0.8795	0.0185	2		0.776	0.025	2		0.829	0.023	2		0.8275	0.0025	2			2.217		0.8025	0.0215	2		0.7095	0.0035	2		0.802	0.009	2		0.7245	0.0045	2		0.736
2.233		0.897	0.003	2		0.8155	0.0355	2		0.852	0.053	2		0.8795	0.0185	2		0.7755	0.0205	2		0.829	0.024	2		0.826	0.004	2			2.233		0.803	0.024	2		0.7105	0.0015	2		0.7965	0.0095	2		0.7455	0.0255	2		0.741
2.25		0.8955	0.0025	2		0.8115	0.0375	2		0.853	0.052	2		0.8815	0.0175	2		0.7725	0.0235	2		0.824	0.024	2		0.824	0.002	2			2.25		0.8035	0.0225	2		0.7065	0.0005	2		0.7975	0.0095	2		0.7275	0.0055	2		0.7385
2.267		0.8945	0.0005	2		0.809	0.041	2		0.8525	0.0535	2		0.8785	0.0185	2		0.768	0.025	2		0.825	0.025	2		0.824	0.003	2			2.267		0.8015	0.0225	2		0.707	0.005	2		0.8	0.009	2		0.7235	0.0035	2		0.7395
2.283		0.896	0.002	2		0.8105	0.0415	2		0.8505	0.0505	2		0.879	0.017	2		0.767	0.024	2		0.8235	0.0285	2		0.8225	0.0035	2			2.283		0.8015	0.0205	2		0.7105	0.0005	2		0.796	0.009	2		0.7205	0.0015	2		0.7375
2.3		0.895	0.004	2		0.8085	0.0425	2		0.852	0.051	2		0.88	0.018	2		0.7655	0.0255	2		0.8235	0.0275	2		0.8205	0.0035	2			2.3		0.8015	0.0195	2		0.707	0.007	2		0.799	0.009	2		0.721	0.003	2		0.7415
2.317		0.894	0.004	2		0.804	0.041	2		0.8505	0.0505	2		0.878	0.018	2		0.76	0.024	2		0.8205	0.0285	2		0.8205	0.0025	2			2.317		0.802	0.021	2		0.7065	0.0015	2		0.7965	0.0095	2		0.7225	0.0055	2		0.7365
2.333		0.8935	0.0055	2		0.8045	0.0405	2		0.8485	0.0485	2		0.8775	0.0185	2		0.761	0.023	2		0.821	0.029	2		0.82	0.001	2			2.333		0.8015	0.0225	2		0.704	0	2		0.797	0.009	2		0.7205	0.0045	2		0.737
2.35		0.894	0.003	2		0.8045	0.0425	2		0.85	0.05	2		0.877	0.018	2		0.759	0.023	2		0.8215	0.0295	2		0.8205	0.0025	2			2.35		0.7995	0.0225	2		0.708	0.001	2		0.7935	0.0115	2		0.7215	0.0045	2		0.738
2.367		0.8965	0.0025	2		0.803	0.042	2		0.849	0.049	2		0.874	0.019	2		0.757	0.023	2		0.8175	0.0305	2		0.819	0.002	2			2.367		0.8	0.023	2		0.7065	0.0035	2		0.7965	0.0095	2		0.72	0.003	2		0.7395
2.383		0.894	0.003	2		0.7985	0.0435	2		0.8485	0.0485	2		0.876	0.017	2		0.7535	0.0255	2		0.8185	0.0315	2		0.8185	0.0025	2			2.383		0.799	0.02	2		0.704	0.002	2		0.7975	0.0095	2		0.7245	0.0075	2		0.737
2.4		0.892	0.006	2		0.799	0.044	2		0.848	0.049	2		0.8775	0.0165	2		0.7515	0.0245	2		0.812	0.032	2		0.816	0.004	2			2.4		0.796	0.022	2		0.7095	0.0035	2		0.799	0.009	2		0.722	0.003	2		0.738
2.417		0.893	0.002	2		0.802	0.045	2		0.8485	0.0485	2		0.876	0.017	2		0.7535	0.0235	2		0.812	0.031	2		0.8165	0.0015	2			2.417		0.795	0.025	2		0.7095	0.0065	2		0.7975	0.0095	2		0.719	0.004	2		0.735
2.433		0.8935	0.0025	2		0.801	0.044	2		0.847	0.048	2		0.8775	0.0175	2		0.752	0.022	2		0.8135	0.0325	2		0.8155	0.0015	2			2.433		0.7965	0.0225	2		0.706	0.001	2		0.7955	0.0095	2		0.722	0.007	2		0.735
2.45		0.893	0.002	2		0.7995	0.0455	2		0.848	0.048	2		0.8765	0.0175	2		0.7495	0.0225	2		0.811	0.035	2		0.814	0.001	2			2.45		0.7955	0.0225	2		0.7015	0.0005	2		0.7955	0.0095	2		0.7185	0.0065	2		0.736
2.467		0.893	0.002	2		0.8015	0.0435	2		0.847	0.049	2		0.875	0.017	2		0.7495	0.0185	2		0.8105	0.0345	2		0.816	0.001	2			2.467		0.7955	0.0245	2		0.702	0.002	2		0.7965	0.0095	2		0.7225	0.0075	2		0.7365
2.483		0.8915	0.0015	2		0.8005	0.0465	2		0.8475	0.0495	2		0.8745	0.0175	2		0.7465	0.0195	2		0.8095	0.0345	2		0.8135	0.0005	2			2.483		0.796	0.024	2		0.7	0.001	2		0.7975	0.0095	2		0.7245	0.0105	2		0.7335
2.5		0.895	0.003	2		0.8005	0.0425	2		0.846	0.049	2		0.875	0.017	2		0.7485	0.0175	2		0.8045	0.0335	2		0.8095	0.0015	2			2.5		0.7945	0.0235	2		0.7	0	2		0.7935	0.0095	2		0.7255	0.0105	2		0.7365
2.517		0.893	0.002	2		0.7995	0.0465	2		0.8475	0.0485	2		0.8725	0.0175	2		0.744	0.018	2		0.8045	0.0345	2		0.8135	0.0025	2			2.517		0.796	0.023	2		0.6995	0.0015	2		0.7955	0.0095	2		0.7175	0.0075	2		0.7345
2.533		0.896	0.004	2		0.799	0.047	2		0.8455	0.0485	2		0.8725	0.0175	2		0.743	0.019	2		0.801	0.038	2		0.813	0.001	2			2.533		0.795	0.022	2		0.697	0.001	2		0.7915	0.0095	2		0.755	0.032	2		0.732
2.55		0.893	0.003	2		0.795	0.05	2		0.8425	0.0485	2		0.874	0.017	2		0.7375	0.0215	2		0.8035	0.0375	2		0.8115	0.0005	2			2.55		0.795	0.023	2		0.696	0.002	2		0.7975	0.0095	2		0.7135	0.0025	2		0.736
2.567		0.892	0.002	2		0.795	0.048	2		0.8435	0.0465	2		0.8745	0.0165	2		0.739	0.02	2		0.8005	0.0365	2		0.8095	0.0005	2			2.567		0.7955	0.0215	2		0.699	0.005	2		0.7955	0.0095	2		0.715	0.005	2		0.731
2.583		0.89	0.002	2		0.7945	0.0515	2		0.8445	0.0475	2		0.8725	0.0175	2		0.7355	0.0205	2		0.7995	0.0375	2		0.8085	0.0005	2			2.583		0.793	0.024	2		0.6995	0.0035	2		0.7945	0.0095	2		0.716	0.007	2		0.7315
2.6		0.889	0.001	2		0.793	0.05	2		0.8455	0.0475	2		0.872	0.018	2		0.733	0.019	2		0.797	0.04	2		0.8095	0.0005	2			2.6		0.7955	0.0175	2		0.6965	0.0015	2		0.7925	0.0095	2		0.716	0.004	2		0.732
2.617		0.8905	0.0015	2		0.7915	0.0495	2		0.841	0.048	2		0.8675	0.0185	2		0.731	0.018	2		0.7975	0.0425	2		0.8095	0.0015	2			2.617		0.7915	0.0245	2		0.699	0.003	2		0.7955	0.0095	2		0.7125	0.0035	2		0.731
2.633		0.891	0.001	2		0.789	0.047	2		0.8435	0.0455	2		0.8705	0.0175	2		0.7305	0.0165	2		0.796	0.04	2		0.808	0.001	2			2.633		0.7915	0.0215	2		0.6965	0.0055	2		0.7935	0.0095	2		0.7125	0.0045	2		0.7295
2.65		0.8905	0.0005	2		0.79	0.049	2		0.8415	0.0455	2		0.8705	0.0185	2		0.728	0.016	2		0.7925	0.0415	2		0.8065	0.0005	2			2.65		0.7945	0.0225	2		0.6975	0.0005	2		0.7945	0.0095	2		0.7185	0.0085	2		0.731
2.667		0.889	0.003	2		0.787	0.049	2		0.842	0.044	2		0.869	0.018	2		0.7275	0.0185	2		0.7925	0.0425	2		0.8055	0.0005	2			2.667		0.789	0.023	2		0.694	0.001	2		0.7965	0.0095	2		0.7145	0.0075	2		0.7285
2.683		0.89	0.001	2		0.789	0.05	2		0.842	0.046	2		0.868	0.018	2		0.7245	0.0145	2		0.7915	0.0455	2		0.8055	0.0005	2			2.683		0.7895	0.0235	2		0.698	0.005	2		0.7935	0.0095	2		0.713	0.004	2		0.7295
2.7		0.887	0.004	2		0.7865	0.0505	2		0.8385	0.0435	2		0.871	0.018	2		0.7245	0.0185	2		0.7895	0.0455	2		0.8045	0.0005	2			2.7		0.791	0.024	2		0.6965	0.0025	2		0.7925	0.0095	2		0.712	0.002	2		0.731
2.717		0.89	0.003	2		0.7845	0.0495	2		0.8395	0.0455	2		0.8715	0.0165	2		0.72	0.015	2		0.788	0.047	2		0.8055	0.0005	2			2.717		0.7905	0.0225	2		0.695	0	2		0.7895	0.0095	2		0.714	0.003	2		0.73
2.733		0.888	0.002	2		0.7845	0.0535	2		0.841	0.043	2		0.871	0.017	2		0.7175	0.0165	2		0.7865	0.0465	2		0.8015	0.0005	2			2.733		0.7875	0.0255	2		0.6945	0.0005	2		0.7935	0.0095	2		0.7145	0.0075	2		0.7285
2.75		0.89	0.003	2		0.7825	0.0525	2		0.8405	0.0455	2		0.8685	0.0175	2		0.717	0.017	2		0.785	0.049	2		0.8005	0.0015	2			2.75		0.784	0.027	2		0.6965	0.0015	2		0.7935	0.0095	2		0.716	0.011	2		0.7285
2.767		0.887	0.003	2		0.7835	0.0535	2		0.841	0.044	2		0.869	0.017	2		0.7155	0.0155	2		0.783	0.045	2		0.8015	0.0005	2			2.767		0.786	0.026	2		0.696	0.005	2		0.7895	0.0095	2		0.7105	0.0025	2		0.728
2.783		0.8885	0.0045	2		0.7835	0.0535	2		0.839	0.045	2		0.8685	0.0165	2		0.7145	0.0145	2		0.7815	0.0475	2		0.8005	0.0005	2			2.783		0.79	0.026	2		0.695	0.002	2		0.7895	0.0095	2		0.712	0.007	2		0.7265
2.8		0.8875	0.0045	2		0.7815	0.0535	2		0.8395	0.0445	2		0.865	0.018	2		0.711	0.013	2		0.78	0.05	2		0.8015	0.0015	2			2.8		0.783	0.026	2		0.697	0.002	2		0.785	0.01	2		0.7125	0.0045	2		0.7255
2.817		0.887	0.003	2		0.7835	0.0535	2		0.838	0.045	2		0.8665	0.0175	2		0.7125	0.0125	2		0.78	0.048	2		0.7995	0.0005	2			2.817		0.7875	0.0215	2		0.6975	0.0035	2		0.7845	0.0095	2		0.7095	0.0035	2		0.7245
2.833		0.888	0.002	2		0.783	0.053	2		0.8395	0.0445	2		0.8685	0.0165	2		0.7125	0.0125	2		0.7775	0.0485	2		0.7975	0.0005	2			2.833		0.785	0.024	2		0.697	0.003	2		0.786	0.01	2		0.7095	0.0095	2		0.725
2.85		0.8875	0.0035	2		0.783	0.053	2		0.8375	0.0435	2		0.8675	0.0175	2		0.7105	0.0105	2		0.775	0.053	2		0.798	0	2			2.85		0.7845	0.0275	2		0.698	0.004	2		0.787	0.01	2		0.7065	0.0025	2		0.7255
2.867		0.8885	0.0045	2		0.7805	0.0525	2		0.8385	0.0435	2		0.865	0.018	2		0.7085	0.0115	2		0.773	0.053	2		0.796	0.002	2			2.867		0.785	0.025	2		0.6975	0.0065	2		0.788	0.01	2		0.71	0.009	2		0.7255
2.883		0.886	0.001	2		0.781	0.056	2		0.84	0.043	2		0.8665	0.0165	2		0.7055	0.0115	2		0.7755	0.0535	2		0.7965	0.0005	2			2.883		0.7845	0.0245	2		0.697	0.006	2		0.7915	0.0095	2		0.7085	0.0065	2		0.7225
2.9		0.887	0.002	2		0.7825	0.0525	2		0.837	0.04	2		0.867	0.017	2		0.7065	0.0065	2		0.772	0.054	2		0.7955	0.0015	2			2.9		0.784	0.023	2		0.6955	0.0035	2		0.7925	0.0095	2		0.7055	0.0045	2		0.7225
2.917		0.8855	0.0015	2		0.7785	0.0545	2		0.8375	0.0415	2		0.867	0.017	2		0.7025	0.0095	2		0.7715	0.0555	2		0.7945	0.0015	2			2.917		0.7855	0.0255	2		0.694	0	2		0.7885	0.0105	2		0.71	0.009	2		0.7225
2.933		0.886	0.002	2		0.778	0.054	2		0.837	0.041	2		0.8685	0.0165	2		0.7005	0.0075	2		0.77	0.057	2		0.794	0.001	2			2.933		0.7875	0.0245	2		0.694	0.003	2		0.792	0.009	2		0.706	0.001	2		0.7235
2.95		0.882	0.001	2		0.7765	0.0555	2		0.837	0.043	2		0.8665	0.0185	2		0.698	0.008	2		0.7655	0.0575	2		0.7925	0.0015	2			2.95		0.7855	0.0275	2		0.695	0.003	2		0.794	0.01	2		0.709	0.008	2		0.724
2.967		0.8865	0.0025	2		0.775	0.056	2		0.837	0.041	2		0.8655	0.0165	2		0.6985	0.0105	2		0.7655	0.0575	2		0.7915	0.0005	2			2.967		0.7825	0.0255	2		0.692	0.001	2		0.7885	0.0095	2		0.708	0.009	2		0.7225
2.983		0.884	0	2		0.7745	0.0565	2		0.8385	0.0425	2		0.863	0.017	2		0.6955	0.0085	2		0.7655	0.0585	2		0.7905	0.0005	2			2.983		0.7815	0.0275	2		0.692	0.003	2		0.789	0.009	2		0.7065	0.0085	2		0.7185
3		0.884	0.001	2		0.7745	0.0575	2		0.837	0.042	2		0.863	0.018	2		0.6925	0.0065	2		0.764	0.058	2		0.7915	0.0005	2			3		0.7815	0.0265	2		0.693	0.003	2		0.7875	0.0085	2		0.701	0.002	2		0.7195
3.017		0.883	0	2		0.7735	0.0575	2		0.8345	0.0405	2		0.864	0.017	2		0.691	0.007	2		0.7595	0.0565	2		0.7905	0.0015	2			3.017		0.782	0.027	2		0.695	0.001	2		0.7865	0.0115	2		0.7075	0.0075	2		0.719
3.033		0.883	0.002	2		0.7705	0.0575	2		0.8335	0.0415	2		0.8645	0.0175	2		0.688	0.007	2		0.759	0.06	2		0.79	0.001	2			3.033		0.7835	0.0245	2		0.693	0.003	2		0.786	0.008	2		0.7045	0.0045	2		0.717
3.05		0.8835	0.0025	2		0.77	0.058	2		0.8355	0.0415	2		0.8615	0.0175	2		0.6875	0.0075	2		0.76	0.063	2		0.7885	0.0015	2			3.05		0.7815	0.0275	2		0.69	0.001	2		0.7855	0.0105	2		0.696	0.001	2		0.7195
3.067		0.8825	0.0035	2		0.769	0.059	2		0.8345	0.0375	2		0.8635	0.0165	2		0.686	0.008	2		0.7585	0.0635	2		0.789	0.002	2			3.067		0.782	0.024	2		0.6915	0.0015	2		0.787	0.01	2		0.7025	0.0065	2		0.72
3.083		0.885	0.002	2		0.771	0.058	2		0.835	0.039	2		0.861	0.018	2		0.685	0.004	2		0.7555	0.0635	2		0.7865	0.0015	2			3.083		0.7815	0.0295	2		0.6895	0.0015	2		0.788	0.01	2		0.7095	0.0125	2		0.718
3.1		0.8825	0.0005	2		0.77	0.058	2		0.836	0.041	2		0.861	0.017	2		0.6845	0.0045	2		0.7545	0.0645	2		0.787	0.002	2			3.1		0.78	0.025	2		0.6925	0.0025	2		0.787	0.008	2		0.703	0.006	2		0.72
3.117		0.884	0.001	2		0.7705	0.0595	2		0.8335	0.0395	2		0.862	0.017	2		0.6835	0.0045	2		0.7535	0.0645	2		0.7825	0.0045	2			3.117		0.779	0.027	2		0.6895	0.0015	2		0.783	0.009	2		0.7055	0.0065	2		0.7145
3.133		0.88	0.001	2		0.7665	0.0605	2		0.834	0.038	2		0.857	0.017	2		0.679	0.006	2		0.752	0.067	2		0.785	0.002	2			3.133		0.7805	0.0265	2		0.693	0	2		0.7875	0.0095	2		0.7045	0.0055	2		0.7155
3.15		0.8835	0.0005	2		0.768	0.058	2		0.835	0.037	2		0.857	0.018	2		0.6795	0.0025	2		0.7505	0.0665	2		0.7845	0.0015	2			3.15		0.778	0.027	2		0.69	0	2		0.7865	0.0105	2		0.7035	0.0055	2		0.719
3.167		0.8815	0.0005	2		0.7635	0.0615	2		0.8335	0.0375	2		0.8605	0.0165	2		0.676	0.007	2		0.7475	0.0665	2		0.784	0.003	2			3.167		0.7795	0.0275	2		0.6895	0.0015	2		0.7895	0.0095	2		0.705	0.01	2		0.717
3.183		0.882	0.002	2		0.7635	0.0595	2		0.832	0.04	2		0.8595	0.0165	2		0.6755	0.0045	2		0.746	0.07	2		0.7815	0.0045	2			3.183		0.7825	0.0235	2		0.692	0.002	2		0.7875	0.0105	2		0.705	0.011	2		0.715
3.2		0.8815	0.0025	2		0.7675	0.0585	2		0.831	0.038	2		0.8585	0.0175	2		0.677	0	2		0.7455	0.0685	2		0.781	0.002	2			3.2		0.778	0.024	2		0.6895	0.0005	2		0.784	0.009	2		0.696	0.005	2		0.7135
3.217		0.8835	0.0015	2		0.765	0.062	2		0.832	0.038	2		0.859	0.017	2		0.672	0.002	2		0.742	0.071	2		0.782	0.001	2			3.217		0.7785	0.0265	2		0.6905	0.0025	2		0.7795	0.0085	2		0.7055	0.0125	2		0.714
3.233		0.8815	0.0005	2		0.7635	0.0625	2		0.8325	0.0385	2		0.8565	0.0175	2		0.6705	0.0035	2		0.7415	0.0705	2		0.7815	0.0015	2			3.233		0.7775	0.0255	2		0.6885	0.0055	2		0.781	0.01	2		0.7015	0.0065	2		0.715
3.25		0.8795	0.0015	2		0.7595	0.0635	2		0.8315	0.0345	2		0.8575	0.0175	2		0.667	0.005	2		0.7395	0.0715	2		0.7815	0.0025	2			3.25		0.7795	0.0265	2		0.685	0.002	2		0.782	0.009	2		0.7	0.006	2		0.7135
3.267		0.8815	0.0005	2		0.7595	0.0615	2		0.832	0.039	2		0.858	0.017	2		0.666	0.002	2		0.74	0.072	2		0.7785	0.0025	2			3.267		0.778	0.027	2		0.6875	0.0035	2		0.7845	0.0085	2		0.7005	0.0075	2		0.7165
3.283		0.878	0.002	2		0.76	0.064	2		0.8315	0.0375	2		0.859	0.017	2		0.664	0.002	2		0.7375	0.0725	2		0.7785	0.0015	2			3.283		0.7765	0.0265	2		0.6885	0.0025	2		0.7835	0.0105	2		0.6985	0.0075	2		0.713
3.3		0.8805	0.0025	2		0.7575	0.0625	2		0.8315	0.0335	2		0.8595	0.0175	2		0.663	0.002	2		0.7375	0.0735	2		0.7795	0.0035	2			3.3		0.7755	0.0265	2		0.6905	0.0045	2		0.7845	0.0105	2		0.708	0.013	2		0.712
3.317		0.8785	0.0005	2		0.7585	0.0665	2		0.829	0.036	2		0.8575	0.0185	2		0.6595	0.0015	2		0.734	0.075	2		0.779	0.001	2			3.317		0.7765	0.0275	2		0.687	0.004	2		0.7845	0.0105	2		0.6975	0.0065	2		0.716
3.333		0.88	0.001	2		0.757	0.065	2		0.829	0.035	2		0.856	0.017	2		0.6585	0.0015	2		0.7335	0.0745	2		0.7775	0.0005	2			3.333		0.777	0.029	2		0.6885	0.0015	2		0.7855	0.0105	2		0.6985	0.0045	2		0.7145
3.35		0.8795	0.0015	2		0.757	0.065	2		0.8285	0.0355	2		0.8545	0.0175	2		0.6575	0.0005	2		0.732	0.076	2		0.774	0.001	2			3.35		0.776	0.029	2		0.6865	0.0045	2		0.7845	0.0085	2		0.705	0.011	2		0.713
3.367		0.8785	0.0015	2		0.7565	0.0655	2		0.829	0.036	2		0.8565	0.0175	2		0.657	0	2		0.7295	0.0755	2		0.7775	0.0035	2			3.367		0.7775	0.0275	2		0.6865	0.0045	2		0.782	0.009	2		0.7	0.006	2		0.7145
3.383		0.8805	0.0005	2		0.7565	0.0665	2		0.8285	0.0375	2		0.8525	0.0185	2		0.655	0.001	2		0.7285	0.0785	2		0.775	0.003	2			3.383		0.776	0.029	2		0.6865	0.0025	2		0.784	0.01	2		0.696	0.005	2		0.7135
3.4		0.879	0.002	2		0.753	0.067	2		0.83	0.034	2		0.8565	0.0175	2		0.65	0.001	2		0.726	0.078	2		0.7755	0.0035	2			3.4		0.773	0.03	2		0.6835	0.0015	2		0.7785	0.0105	2		0.7005	0.0105	2		0.7145
3.417		0.8795	0.0015	2		0.754	0.067	2		0.829	0.035	2		0.854	0.018	2		0.6495	0.0025	2		0.7285	0.0785	2		0.773	0	2			3.417		0.7765	0.0275	2		0.6845	0.0005	2		0.782	0.01	2		0.698	0.009	2		0.7125
3.433		0.879	0.001	2		0.7545	0.0665	2		0.8295	0.0335	2		0.853	0.017	2		0.6505	0.0025	2		0.7235	0.0805	2		0.7735	0.0015	2			3.433		0.778	0.029	2		0.6875	0.0045	2		0.7815	0.0095	2		0.6935	0.0045	2		0.7135
3.45		0.876	0.001	2		0.7495	0.0685	2		0.8285	0.0355	2		0.8525	0.0175	2		0.646	0	2		0.7245	0.0825	2		0.7735	0.0015	2			3.45		0.7735	0.0285	2		0.682	0.001	2		0.781	0.01	2		0.6945	0.0025	2		0.712
3.467		0.8755	0.0005	2		0.7505	0.0695	2		0.8285	0.0355	2		0.8515	0.0185	2		0.644	0.001	2		0.722	0.079	2		0.771	0.003	2			3.467		0.773	0.026	2		0.6865	0.0015	2		0.7815	0.0095	2		0.697	0.006	2		0.7125
3.483		0.878	0.003	2		0.7505	0.0685	2		0.8285	0.0355	2		0.852	0.018	2		0.6435	0.0035	2		0.7215	0.0835	2		0.769	0.004	2			3.483		0.7735	0.0265	2		0.687	0.001	2		0.7795	0.0125	2		0.6995	0.0105	2		0.7115
3.5		0.8795	0.0005	2		0.7515	0.0685	2		0.8275	0.0345	2		0.8535	0.0175	2		0.6435	0.0045	2		0.7185	0.0845	2		0.7695	0.0035	2			3.5		0.773	0.027	2		0.6835	0.0015	2		0.7815	0.0105	2		0.695	0.008	2		0.71
3.517		0.878	0	2		0.75	0.069	2		0.827	0.033	2		0.851	0.019	2		0.6415	0.0045	2		0.7165	0.0835	2		0.768	0.004	2			3.517		0.771	0.027	2		0.686	0.002	2		0.7795	0.0135	2		0.697	0.008	2		0.708
3.533		0.878	0.001	2		0.7495	0.0685	2		0.8275	0.0325	2		0.8515	0.0165	2		0.6395	0.0065	2		0.7145	0.0835	2		0.769	0.005	2			3.533		0.773	0.025	2		0.687	0.001	2		0.78	0.013	2		0.695	0.009	2		0.708
3.55		0.8775	0.0015	2		0.7485	0.0705	2		0.8275	0.0335	2		0.8525	0.0165	2		0.6365	0.0055	2		0.716	0.086	2		0.7705	0.0015	2			3.55		0.7755	0.0285	2		0.6835	0.0035	2		0.7815	0.0135	2		0.698	0.011	2		0.7075
3.567		0.876	0.001	2		0.7465	0.0705	2		0.826	0.033	2		0.851	0.017	2		0.635	0.004	2		0.7145	0.0855	2		0.7695	0.0025	2			3.567		0.772	0.028	2		0.684	0.003	2		0.7845	0.0095	2		0.6955	0.0095	2		0.706
3.583		0.8765	0.0005	2		0.747	0.071	2		0.828	0.031	2		0.8525	0.0175	2		0.6335	0.0065	2		0.7115	0.0875	2		0.766	0.005	2			3.583		0.7725	0.0285	2		0.685	0.004	2		0.783	0.009	2		0.6935	0.0045	2		0.707
3.6		0.8755	0.0005	2		0.7495	0.0685	2		0.8265	0.0335	2		0.8515	0.0175	2		0.6355	0.0095	2		0.7105	0.0875	2		0.7645	0.0015	2			3.6		0.7705	0.0255	2		0.683	0.003	2		0.7795	0.0105	2		0.6965	0.0105	2		0.7045
3.617		0.876	0	2		0.7465	0.0695	2		0.8255	0.0315	2		0.8505	0.0185	2		0.6335	0.0075	2		0.709	0.088	2		0.7665	0.0015	2			3.617		0.7705	0.0275	2		0.685	0.004	2		0.7845	0.0095	2		0.696	0.012	2		0.7045
3.633		0.8765	0.0005	2		0.7445	0.0695	2		0.8245	0.0315	2		0.8475	0.0185	2		0.6305	0.0085	2		0.7085	0.0905	2		0.7625	0.0025	2			3.633		0.7735	0.0265	2		0.684	0.004	2		0.7815	0.0105	2		0.695	0.01	2		0.702
3.65		0.874	0	2		0.7425	0.0685	2		0.8245	0.0325	2		0.851	0.017	2		0.629	0.009	2		0.706	0.09	2		0.764	0.001	2			3.65		0.771	0.03	2		0.682	0.003	2		0.779	0.01	2		0.6915	0.0065	2		0.703
3.667		0.875	0.001	2		0.7415	0.0715	2		0.824	0.028	2		0.8485	0.0165	2		0.6265	0.0065	2		0.7025	0.0905	2		0.7615	0.0025	2			3.667		0.7725	0.0325	2		0.6845	0.0035	2		0.778	0.009	2		0.6945	0.0075	2		0.7025
3.683		0.875	0.001	2		0.7385	0.0685	2		0.8245	0.0295	2		0.849	0.017	2		0.6245	0.0085	2		0.702	0.092	2		0.763	0.003	2			3.683		0.772	0.031	2		0.682	0	2		0.7755	0.0095	2		0.694	0.008	2		0.7025
3.7		0.8755	0.0015	2		0.742	0.069	2		0.8225	0.0315	2		0.8475	0.0165	2		0.6255	0.0115	2		0.702	0.092	2		0.7605	0.0015	2			3.7		0.7725	0.0275	2		0.684	0.005	2		0.7755	0.0095	2		0.6915	0.0075	2		0.7025
3.717		0.873	0.001	2		0.7415	0.0705	2		0.8225	0.0305	2		0.8475	0.0175	2		0.622	0.012	2		0.6985	0.0935	2		0.7615	0.0035	2			3.717		0.7715	0.0265	2		0.6835	0.0035	2		0.7765	0.0095	2		0.691	0.008	2		0.702
3.733		0.873	0.001	2		0.739	0.071	2		0.825	0.028	2		0.8475	0.0175	2		0.621	0.01	2		0.6975	0.0955	2		0.762	0.003	2			3.733		0.771	0.029	2		0.6835	0.0035	2		0.776	0.011	2		0.69	0.006	2		0.7015
3.75		0.8755	0.0015	2		0.7385	0.0745	2		0.8205	0.0285	2		0.8475	0.0185	2		0.617	0.01	2		0.6975	0.0935	2		0.761	0.001	2			3.75		0.77	0.028	2		0.6805	0.0025	2		0.777	0.011	2		0.6925	0.0085	2		0.6995
3.767		0.875	0.002	2		0.7385	0.0715	2		0.8215	0.0315	2		0.8465	0.0165	2		0.619	0.011	2		0.695	0.095	2		0.761	0.004	2			3.767		0.773	0.027	2		0.684	0.005	2		0.7765	0.0105	2		0.6905	0.0075	2		0.7005
3.783		0.875	0.001	2		0.7355	0.0755	2		0.8225	0.0295	2		0.846	0.018	2		0.614	0.008	2		0.694	0.096	2		0.7575	0.0025	2			3.783		0.7685	0.0255	2		0.6775	0.0035	2		0.7775	0.0095	2		0.692	0.008	2		0.7015
3.8		0.8745	0.0015	2		0.734	0.075	2		0.821	0.028	2		0.8445	0.0185	2		0.612	0.009	2		0.6935	0.0965	2		0.7575	0.0015	2			3.8		0.772	0.028	2		0.6765	0.0015	2		0.7765	0.0095	2		0.6955	0.0115	2		0.7005
3.817		0.8755	0.0005	2		0.736	0.074	2		0.8215	0.0295	2		0.846	0.018	2		0.6115	0.0125	2		0.6905	0.0955	2		0.7575	0.0025	2			3.817		0.77	0.028	2		0.6815	0.0015	2		0.78	0.011	2		0.691	0.01	2		0.697
3.833		0.874	0	2		0.7365	0.0755	2		0.8215	0.0295	2		0.843	0.018	2		0.611	0.012	2		0.6865	0.0965	2		0.754	0.002	2			3.833		0.7715	0.0275	2		0.6825	0.0035	2		0.777	0.01	2		0.691	0.012	2		0.699
3.85		0.875	0.002	2		0.7335	0.0755	2		0.8235	0.0275	2		0.8435	0.0165	2		0.609	0.011	2		0.6885	0.0995	2		0.7575	0.0015	2			3.85		0.77	0.027	2		0.683	0.004	2		0.779	0.01	2		0.6905	0.0095	2		0.6955
3.867		0.8745	0.0005	2		0.7355	0.0745	2		0.823	0.031	2		0.844	0.017	2		0.608	0.016	2		0.686	0.099	2		0.7555	0.0025	2			3.867		0.7695	0.0295	2		0.681	0.004	2		0.7765	0.0095	2		0.6905	0.0115	2		0.6975
3.883		0.8735	0.0015	2		0.733	0.076	2		0.8225	0.0265	2		0.8445	0.0175	2		0.6055	0.0135	2		0.685	0.1	2		0.7545	0.0015	2			3.883		0.7685	0.0235	2		0.679	0.003	2		0.778	0.01	2		0.6935	0.0115	2		0.696
3.9		0.8745	0.0025	2		0.73	0.076	2		0.822	0.028	2		0.843	0.018	2		0.6035	0.0125	2		0.685	0.1	2		0.753	0.002	2			3.9		0.7695	0.0265	2		0.679	0.001	2		0.779	0.011	2		0.695	0.009	2		0.695
3.917		0.8735	0.0025	2		0.733	0.076	2		0.8205	0.0275	2		0.844	0.017	2		0.604	0.015	2		0.6825	0.1015	2		0.7535	0.0025	2			3.917		0.768	0.03	2		0.681	0.006	2		0.7805	0.0095	2		0.6875	0.0085	2		0.696
3.933		0.8725	0.0005	2		0.7285	0.0775	2		0.821	0.025	2		0.841	0.018	2		0.6005	0.0125	2		0.6815	0.1035	2		0.7525	0.0035	2			3.933		0.7705	0.0315	2		0.684	0.003	2		0.779	0.01	2		0.684	0.005	2		0.695
3.95		0.872	0.001	2		0.7295	0.0795	2		0.821	0.027	2		0.8415	0.0165	2		0.597	0.014	2		0.68	0.102	2		0.753	0.002	2			3.95		0.7675	0.0245	2		0.68	0	2		0.776	0.011	2		0.6875	0.0075	2		0.6945
3.967		0.873	0.001	2		0.7295	0.0775	2		0.8185	0.0265	2		0.843	0.018	2		0.598	0.015	2		0.6755	0.1005	2		0.752	0.002	2			3.967		0.765	0.027	2		0.681	0.003	2		0.7765	0.0105	2		0.689	0.01	2		0.695
3.983		0.87	0.002	2		0.725	0.077	2		0.817	0.023	2		0.843	0.018	2		0.5945	0.0145	2		0.676	0.104	2		0.7495	0.0025	2			3.983		0.768	0.03	2		0.6795	0.0035	2		0.778	0.01	2		0.687	0.007	2		0.6955
4		0.872	0	2		0.725	0.081	2		0.8195	0.0235	2		0.8395	0.0185	2		0.5915	0.0125	2		0.673	0.104	2		0.749	0.004	2			4		0.767	0.028	2		0.681	0.003	2		0.78	0.01	2		0.6905	0.0125	2		0.696
4.017		0.8715	0.0015	2		0.724	0.079	2		0.818	0.026	2		0.8425	0.0175	2		0.592	0.014	2		0.673	0.106	2		0.749	0.002	2			4.017		0.767	0.03	2		0.6795	0.0025	2		0.7745	0.0095	2		0.692	0.014	2		0.6945
4.033		0.8705	0.0005	2		0.725	0.08	2		0.818	0.026	2		0.8415	0.0185	2		0.5905	0.0145	2		0.671	0.105	2		0.75	0.002	2			4.033		0.7675	0.0285	2		0.679	0.003	2		0.775	0.01	2		0.688	0.012	2		0.6945
4.05		0.8695	0.0005	2		0.7195	0.0835	2		0.8165	0.0245	2		0.8405	0.0175	2		0.583	0.012	2		0.669	0.105	2		0.7475	0.0035	2			4.05		0.767	0.031	2		0.678	0	2		0.7785	0.0105	2		0.683	0.006	2		0.695
4.067		0.8685	0.0015	2		0.7205	0.0825	2		0.8165	0.0245	2		0.838	0.018	2		0.585	0.013	2		0.668	0.107	2		0.747	0.004	2			4.067		0.7695	0.0265	2		0.675	0.004	2		0.7755	0.0095	2		0.6835	0.0075	2		0.6925
4.083		0.8695	0.0035	2		0.7225	0.0815	2		0.8165	0.0255	2		0.8385	0.0175	2		0.586	0.015	2		0.6635	0.1075	2		0.7485	0.0035	2			4.083		0.768	0.028	2		0.68	0.002	2		0.776	0.01	2		0.682	0.008	2		0.696
4.1		0.8705	0.0015	2		0.718	0.082	2		0.819	0.024	2		0.8365	0.0175	2		0.5805	0.0155	2		0.665	0.108	2		0.748	0.004	2			4.1		0.7685	0.0275	2		0.681	0.003	2		0.7745	0.0115	2		0.6875	0.0115	2		0.6915
4.117		0.871	0.002	2		0.72	0.083	2		0.816	0.026	2		0.839	0.017	2		0.58	0.017	2		0.663	0.108	2		0.7485	0.0015	2			4.117		0.7675	0.0295	2		0.6785	0.0015	2		0.7735	0.0105	2		0.691	0.015	2		0.6925
4.133		0.8715	0.0015	2		0.717	0.083	2		0.8155	0.0245	2		0.8385	0.0175	2		0.578	0.016	2		0.6625	0.1085	2		0.7485	0.0035	2			4.133		0.768	0.029	2		0.676	0.001	2		0.7745	0.0105	2		0.6825	0.0075	2		0.6935
4.15		0.8705	0.0025	2		0.719	0.082	2		0.8165	0.0245	2		0.8375	0.0165	2		0.5785	0.0175	2		0.6575	0.1095	2		0.7465	0.0025	2			4.15		0.7645	0.0325	2		0.6805	0.0035	2		0.777	0.012	2		0.6915	0.0165	2		0.691
4.167		0.871	0.004	2		0.718	0.083	2		0.8175	0.0245	2		0.837	0.018	2		0.578	0.016	2		0.6565	0.1075	2		0.7455	0.0025	2			4.167		0.7705	0.0305	2		0.6775	0.0015	2		0.7755	0.0095	2		0.688	0.014	2		0.6915
4.183		0.868	0.003	2		0.719	0.083	2		0.8165	0.0225	2		0.838	0.017	2		0.5765	0.0185	2		0.657	0.11	2		0.7445	0.0045	2			4.183		0.7665	0.0275	2		0.678	0.002	2		0.776	0.008	2		0.682	0.009	2		0.6915
4.2		0.8695	0.0035	2		0.721	0.084	2		0.8165	0.0235	2		0.835	0.017	2		0.576	0.021	2		0.654	0.111	2		0.7435	0.0045	2			4.2		0.7655	0.0275	2		0.677	0.001	2		0.7755	0.0105	2		0.684	0.009	2		0.691
4.217		0.87	0.003	2		0.715	0.086	2		0.814	0.023	2		0.835	0.018	2		0.571	0.017	2		0.6525	0.1105	2		0.743	0.003	2			4.217		0.7665	0.0255	2		0.674	0.003	2		0.778	0.01	2		0.682	0.008	2		0.692
4.233		0.868	0.004	2		0.7145	0.0865	2		0.814	0.023	2		0.8355	0.0175	2		0.5685	0.0185	2		0.651	0.112	2		0.7425	0.0025	2			4.233		0.7675	0.0285	2		0.674	0.004	2		0.775	0.01	2		0.6895	0.0145	2		0.691
4.25		0.866	0	2		0.71	0.087	2		0.814	0.023	2		0.8355	0.0175	2		0.565	0.016	2		0.6495	0.1125	2		0.7425	0.0025	2			4.25		0.769	0.03	2		0.678	0.003	2		0.777	0.01	2		0.6855	0.0135	2		0.692
4.267		0.869	0.002	2		0.7085	0.0885	2		0.8125	0.0205	2		0.8345	0.0165	2		0.5625	0.0155	2		0.649	0.113	2		0.7425	0.0035	2			4.267		0.764	0.028	2		0.676	0.001	2		0.7795	0.0105	2		0.684	0.014	2		0.6935
4.283		0.8675	0.0005	2		0.712	0.088	2		0.8135	0.0185	2		0.834	0.017	2		0.5645	0.0175	2		0.646	0.114	2		0.742	0.002	2			4.283		0.765	0.028	2		0.6755	0.0005	2		0.7755	0.0105	2		0.685	0.014	2		0.6905
4.3		0.866	0	2		0.7075	0.0915	2		0.8135	0.0215	2		0.833	0.019	2		0.5595	0.0135	2		0.6445	0.1135	2		0.7405	0.0035	2			4.3		0.7665	0.0305	2		0.6775	0.0015	2		0.7745	0.0105	2		0.6855	0.0155	2		0.6915
4.317		0.864	0.001	2		0.712	0.088	2		0.8115	0.0215	2		0.8325	0.0175	2		0.563	0.019	2		0.644	0.114	2		0.7395	0.0055	2			4.317		0.767	0.03	2		0.678	0.002	2		0.7755	0.0105	2		0.6805	0.0095	2		0.6905
4.333		0.8665	0.0005	2		0.7065	0.0895	2		0.812	0.021	2		0.8335	0.0185	2		0.5585	0.0165	2		0.6435	0.1155	2		0.74	0.005	2			4.333		0.768	0.03	2		0.678	0.004	2		0.776	0.01	2		0.686	0.014	2		0.6915
4.35		0.868	0.001	2		0.708	0.089	2		0.813	0.021	2		0.831	0.017	2		0.559	0.018	2		0.6415	0.1155	2		0.7395	0.0045	2			4.35		0.7655	0.0285	2		0.6745	0.0025	2		0.777	0.01	2		0.68	0.009	2		0.6895
4.367		0.866	0.001	2		0.706	0.092	2		0.8125	0.0205	2		0.8315	0.0175	2		0.5535	0.0175	2		0.639	0.118	2		0.739	0.005	2			4.367		0.7655	0.0285	2		0.6785	0.0005	2		0.7785	0.0095	2		0.6815	0.0105	2		0.692
4.383		0.866	0.001	2		0.7065	0.0915	2		0.814	0.02	2		0.8285	0.0185	2		0.5535	0.0185	2		0.6385	0.1175	2		0.736	0.006	2			4.383		0.7665	0.0295	2		0.678	0.005	2		0.777	0.011	2		0.6795	0.0075	2		0.6905
4.4		0.8665	0.0005	2		0.7045	0.0935	2		0.811	0.02	2		0.83	0.017	2		0.5505	0.0175	2		0.637	0.117	2		0.738	0.004	2			4.4		0.768	0.029	2		0.679	0.003	2		0.778	0.011	2		0.678	0.01	2		0.6915
4.417		0.8675	0.0015	2		0.706	0.091	2		0.811	0.021	2		0.83	0.018	2		0.5505	0.0215	2		0.6355	0.1175	2		0.7365	0.0055	2			4.417		0.7675	0.0295	2		0.673	0.001	2		0.775	0.011	2		0.6845	0.0125	2		0.692
4.433		0.8675	0.0025	2		0.7045	0.0915	2		0.812	0.02	2		0.83	0.018	2		0.5495	0.0205	2		0.631	0.121	2		0.7365	0.0055	2			4.433		0.765	0.027	2		0.675	0.006	2		0.778	0.01	2		0.685	0.013	2		0.6865
4.45		0.866	0	2		0.7055	0.0915	2		0.8105	0.0195	2		0.829	0.017	2		0.5505	0.0205	2		0.632	0.121	2		0.7345	0.0035	2			4.45		0.7655	0.0285	2		0.6755	0.0015	2		0.779	0.01	2		0.6835	0.0115	2		0.6885
4.467		0.8635	0.0025	2		0.7035	0.0925	2		0.808	0.019	2		0.829	0.018	2		0.547	0.02	2		0.6295	0.1195	2		0.7375	0.0045	2			4.467		0.765	0.03	2		0.6765	0.0025	2		0.778	0.008	2		0.6865	0.0165	2		0.6905
4.483		0.8635	0.0005	2		0.706	0.09	2		0.8105	0.0205	2		0.8275	0.0175	2		0.5485	0.0255	2		0.626	0.119	2		0.733	0.007	2			4.483		0.764	0.031	2		0.6765	0.0015	2		0.777	0.012	2		0.68	0.013	2		0.6905
4.5		0.865	0.001	2		0.7025	0.0925	2		0.8075	0.0205	2		0.8295	0.0185	2		0.5445	0.0215	2		0.625	0.12	2		0.7335	0.0055	2			4.5		0.765	0.029	2		0.676	0.002	2		0.7745	0.0105	2		0.675	0.008	2		0.691
4.517		0.8655	0.0005	2		0.7045	0.0925	2		0.807	0.018	2		0.8295	0.0185	2		0.546	0.023	2		0.6245	0.1215	2		0.7315	0.0045	2			4.517		0.7645	0.0285	2		0.6715	0.0005	2		0.771	0.01	2		0.684	0.016	2		0.6885
4.533		0.865	0.004	2		0.696	0.094	2		0.8085	0.0195	2		0.8285	0.0175	2		0.539	0.019	2		0.6235	0.1215	2		0.734	0.005	2			4.533		0.7665	0.0275	2		0.676	0.002	2		0.7755	0.0105	2		0.681	0.013	2		0.688
4.55		0.864	0.004	2		0.7005	0.0945	2		0.807	0.015	2		0.8275	0.0175	2		0.5385	0.0235	2		0.622	0.122	2		0.733	0.005	2			4.55		0.763	0.027	2		0.6725	0.0035	2		0.777	0.01	2		0.6825	0.0135	2		0.6895
4.567		0.864	0.004	2		0.699	0.096	2		0.8075	0.0165	2		0.8285	0.0165	2		0.5365	0.0215	2		0.6165	0.1205	2		0.733	0.006	2			4.567		0.7615	0.0275	2		0.6755	0.0035	2		0.7785	0.0105	2		0.682	0.015	2		0.687
4.583		0.86	0.003	2		0.701	0.093	2		0.806	0.018	2		0.828	0.016	2		0.5395	0.0245	2		0.618	0.124	2		0.7325	0.0055	2			4.583		0.765	0.029	2		0.677	0.005	2		0.78	0.01	2		0.6765	0.0095	2		0.6875
4.6		0.8635	0.0015	2		0.697	0.096	2		0.8075	0.0175	2		0.825	0.017	2		0.5345	0.0225	2		0.6145	0.1235	2		0.732	0.007	2			4.6		0.763	0.028	2		0.676	0.004	2		0.7805	0.0105	2		0.6875	0.0195	2		0.6865
4.617		0.8635	0.0025	2		0.7005	0.0945	2		0.8085	0.0165	2		0.824	0.017	2		0.5365	0.0255	2		0.615	0.123	2		0.732	0.008	2			4.617		0.7645	0.0285	2		0.6775	0.0015	2		0.7755	0.0105	2		0.672	0.006	2		0.6875
4.633		0.8635	0.0005	2		0.697	0.096	2		0.807	0.016	2		0.8275	0.0175	2		0.5325	0.0245	2		0.6115	0.1225	2		0.7325	0.0075	2			4.633		0.7635	0.0285	2		0.678	0	2		0.777	0.01	2		0.679	0.011	2		0.6835
4.65		0.8615	0.0015	2		0.6965	0.0955	2		0.8045	0.0185	2		0.825	0.017	2		0.532	0.025	2		0.61	0.123	2		0.7295	0.0055	2			4.65		0.7635	0.0295	2		0.673	0.001	2		0.774	0.01	2		0.6795	0.0125	2		0.6855
4.667		0.8635	0.0015	2		0.697	0.097	2		0.8035	0.0175	2		0.8255	0.0165	2		0.5305	0.0255	2		0.6085	0.1265	2		0.7295	0.0045	2			4.667		0.7625	0.0295	2		0.6695	0.0005	2		0.7735	0.0105	2		0.679	0.01	2		0.683
4.683		0.8635	0.0025	2		0.698	0.096	2		0.805	0.016	2		0.825	0.018	2		0.53	0.028	2		0.605	0.124	2		0.7285	0.0065	2			4.683		0.761	0.031	2		0.6755	0.0015	2		0.773	0.01	2		0.6775	0.0125	2		0.685
4.7		0.863	0	2		0.694	0.097	2		0.807	0.018	2		0.826	0.017	2		0.527	0.026	2		0.6045	0.1235	2		0.726	0.007	2			4.7		0.763	0.031	2		0.673	0.001	2		0.7735	0.0105	2		0.6785	0.0125	2		0.6815
4.717		0.863	0.001	2		0.695	0.096	2		0.806	0.017	2		0.823	0.017	2		0.5275	0.0275	2		0.601	0.122	2		0.7265	0.0075	2			4.717		0.763	0.03	2		0.6775	0.0025	2		0.7735	0.0105	2		0.673	0.01	2		0.6835
4.733		0.86	0.002	2		0.695	0.095	2		0.8035	0.0185	2		0.823	0.016	2		0.527	0.029	2		0.5995	0.1255	2		0.7275	0.0075	2			4.733		0.7585	0.0275	2		0.6745	0.0015	2		0.7735	0.0105	2		0.679	0.014	2		0.684
4.75		0.8645	0.0025	2		0.695	0.095	2		0.804	0.016	2		0.8215	0.0165	2		0.5265	0.0295	2		0.6	0.124	2		0.7265	0.0055	2			4.75		0.761	0.03	2		0.673	0.002	2		0.7735	0.0105	2		0.6755	0.0105	2		0.685
4.767		0.862	0.003	2		0.694	0.096	2		0.804	0.015	2		0.824	0.018	2		0.524	0.029	2		0.597	0.126	2		0.7265	0.0075	2			4.767		0.759	0.027	2		0.672	0.002	2		0.7685	0.0105	2		0.6805	0.0135	2		0.6825
4.783		0.8645	0.0025	2		0.692	0.096	2		0.803	0.014	2		0.8235	0.0175	2		0.522	0.03	2		0.5955	0.1255	2		0.7255	0.0065	2			4.783		0.759	0.03	2		0.671	0.002	2		0.7695	0.0105	2		0.6735	0.0095	2		0.6855
4.8		0.8635	0.0045	2		0.6915	0.0945	2		0.802	0.017	2		0.8215	0.0175	2		0.5205	0.0315	2		0.5925	0.1245	2		0.727	0.006	2			4.8		0.76	0.025	2		0.677	0.003	2		0.7705	0.0105	2		0.675	0.012	2		0.6825
4.817		0.8605	0.0035	2		0.691	0.098	2		0.803	0.014	2		0.8235	0.0165	2		0.5185	0.0295	2		0.5925	0.1255	2		0.725	0.006	2			4.817		0.763	0.028	2		0.67	0.001	2		0.7715	0.0105	2		0.6755	0.0105	2		0.6815
4.833		0.862	0.003	2		0.6915	0.0955	2		0.8025	0.0145	2		0.821	0.018	2		0.52	0.032	2		0.5905	0.1255	2		0.724	0.006	2			4.833		0.761	0.028	2		0.6735	0.0025	2		0.7745	0.0125	2		0.6795	0.0175	2		0.6835
4.85		0.8615	0.0035	2		0.6905	0.0955	2		0.803	0.016	2		0.82	0.016	2		0.5175	0.0325	2		0.589	0.126	2		0.7245	0.0065	2			4.85		0.7585	0.0305	2		0.672	0.004	2		0.769	0.011	2		0.6755	0.0105	2		0.683
4.867		0.8605	0.0045	2		0.6915	0.0955	2		0.803	0.015	2		0.8145	0.0185	2		0.518	0.033	2		0.587	0.128	2		0.724	0.006	2			4.867		0.76	0.032	2		0.671	0.006	2		0.7725	0.0105	2		0.679	0.014	2		0.68
4.883		0.86	0.005	2		0.6895	0.0955	2		0.8025	0.0145	2		0.818	0.017	2		0.5155	0.0335	2		0.583	0.125	2		0.723	0.006	2			4.883		0.7615	0.0275	2		0.671	0.003	2		0.7705	0.0105	2		0.6785	0.0115	2		0.6795
4.9		0.8585	0.0065	2		0.6875	0.0985	2		0.802	0.015	2		0.8205	0.0165	2		0.5115	0.0315	2		0.5845	0.1265	2		0.7235	0.0065	2			4.9		0.7615	0.0285	2		0.6725	0.0035	2		0.773	0.012	2		0.673	0.012	2		0.682
4.917		0.857	0.004	2		0.689	0.098	2		0.802	0.014	2		0.819	0.017	2		0.5125	0.0335	2		0.583	0.127	2		0.723	0.005	2			4.917		0.758	0.03	2		0.67	0.002	2		0.774	0.01	2		0.6715	0.0095	2		0.6805
4.933		0.858	0.002	2		0.6895	0.0955	2		0.7985	0.0145	2		0.819	0.015	2		0.513	0.036	2		0.577	0.125	2		0.723	0.008	2			4.933		0.759	0.032	2		0.675	0.002	2		0.7755	0.0105	2		0.6775	0.0165	2		0.6785
4.95		0.859	0.004	2		0.6855	0.0975	2		0.8005	0.0135	2		0.8185	0.0165	2		0.509	0.034	2		0.5775	0.1265	2		0.7205	0.0075	2			4.95		0.76	0.027	2		0.671	0.004	2		0.7715	0.0105	2		0.673	0.011	2		0.6805
4.967		0.859	0.003	2		0.689	0.097	2		0.8	0.012	2		0.8185	0.0175	2		0.51	0.037	2		0.574	0.129	2		0.721	0.01	2			4.967		0.757	0.029	2		0.668	0	2		0.7735	0.0105	2		0.678	0.015	2		0.681
4.983		0.8575	0.0025	2		0.685	0.097	2		0.7995	0.0135	2		0.818	0.016	2		0.5065	0.0355	2		0.574	0.127	2		0.719	0.007	2			4.983		0.759	0.031	2		0.6675	0.0005	2		0.7715	0.0115	2		0.6775	0.0155	2		0.681
5		0.859	0.003	2		0.684	0.098	2		0.7995	0.0145	2		0.8155	0.0175	2		0.504	0.036	2		0.571	0.126	2		0.72	0.01	2			5		0.76	0.027	2		0.669	0.001	2		0.7725	0.0115	2		0.678	0.016	2		0.679
5.017		0.859	0.003	2		0.6835	0.0965	2		0.7995	0.0125	2		0.818	0.017	2		0.505	0.036	2		0.5685	0.1245	2		0.72	0.008	2			5.017		0.759	0.03	2		0.6705	0.0025	2		0.77	0.008	2		0.6735	0.0145	2		0.6785
5.033		0.8575	0.0055	2		0.6835	0.0975	2		0.796	0.014	2		0.8175	0.0175	2		0.502	0.038	2		0.566	0.128	2		0.716	0.007	2			5.033		0.7585	0.0295	2		0.671	0.001	2		0.774	0.011	2		0.6735	0.0125	2		0.68
5.05		0.8575	0.0055	2		0.686	0.098	2		0.7965	0.0135	2		0.813	0.017	2		0.5025	0.0395	2		0.5655	0.1255	2		0.7175	0.0065	2			5.05		0.7585	0.0305	2		0.6705	0.0025	2		0.768	0.011	2		0.67	0.005	2		0.684
5.067		0.8595	0.0045	2		0.6835	0.0985	2		0.796	0.013	2		0.8155	0.0165	2		0.5005	0.0385	2		0.5645	0.1275	2		0.717	0.009	2			5.067		0.762	0.029	2		0.6675	0.0035	2		0.767	0.01	2		0.6735	0.0125	2		0.6825
5.083		0.8585	0.0035	2		0.6805	0.0995	2		0.795	0.014	2		0.8145	0.0175	2		0.498	0.037	2		0.5605	0.1265	2		0.7175	0.0075	2			5.083		0.7595	0.0285	2		0.672	0.002	2		0.7695	0.0105	2		0.676	0.014	2		0.6785
5.1		0.8585	0.0035	2		0.6825	0.0985	2		0.7965	0.0125	2		0.815	0.018	2		0.498	0.04	2		0.559	0.127	2		0.716	0.006	2			5.1		0.759	0.029	2		0.6685	0.0005	2		0.7695	0.0105	2		0.673	0.012	2		0.6795
5.117		0.858	0.004	2		0.685	0.097	2		0.7975	0.0135	2		0.8125	0.0165	2		0.5	0.042	2		0.559	0.128	2		0.7175	0.0075	2			5.117		0.759	0.03	2		0.672	0	2		0.7695	0.0105	2		0.6755	0.0155	2		0.6825
5.133		0.856	0.004	2		0.681	0.098	2		0.796	0.015	2		0.8115	0.0175	2		0.4965	0.0405	2		0.5555	0.1255	2		0.714	0.008	2			5.133		0.758	0.032	2		0.6715	0.0025	2		0.77	0.011	2		0.673	0.013	2		0.681
5.15		0.8575	0.0045	2		0.679	0.099	2		0.794	0.014	2		0.814	0.016	2		0.493	0.04	2		0.553	0.125	2		0.7135	0.0075	2			5.15		0.757	0.029	2		0.671	0.002	2		0.7695	0.0105	2		0.6705	0.0115	2		0.68
5.167		0.859	0.004	2		0.68	0.099	2		0.795	0.014	2		0.8135	0.0165	2		0.4925	0.0415	2		0.5515	0.1285	2		0.715	0.007	2			5.167		0.756	0.031	2		0.6685	0.0015	2		0.765	0.011	2		0.6765	0.0195	2		0.682
5.183		0.8585	0.0045	2		0.6775	0.1005	2		0.795	0.012	2		0.813	0.017	2		0.491	0.039	2		0.55	0.127	2		0.7145	0.0085	2			5.183		0.757	0.031	2		0.67	0.002	2		0.7715	0.0105	2		0.672	0.011	2		0.679
5.2		0.8565	0.0045	2		0.68	0.102	2		0.791	0.012	2		0.813	0.016	2		0.489	0.042	2		0.548	0.127	2		0.718	0.008	2			5.2		0.757	0.026	2		0.668	0	2		0.7695	0.0105	2		0.6725	0.0145	2		0.68
5.217		0.857	0.005	2		0.677	0.102	2		0.7945	0.0125	2		0.813	0.017	2		0.488	0.04	2		0.5455	0.1265	2		0.714	0.008	2			5.217		0.754	0.028	2		0.671	0.004	2		0.7705	0.0105	2		0.671	0.014	2		0.68
5.233		0.8565	0.0035	2		0.676	0.102	2		0.792	0.014	2		0.812	0.016	2		0.486	0.041	2		0.5425	0.1255	2		0.7115	0.0095	2			5.233		0.758	0.028	2		0.673	0.002	2		0.7715	0.0105	2		0.6695	0.0115	2		0.6785
5.25		0.8555	0.0035	2		0.679	0.102	2		0.792	0.012	2		0.8135	0.0175	2		0.4875	0.0425	2		0.5395	0.1265	2		0.712	0.007	2			5.25		0.7595	0.0285	2		0.6705	0.0035	2		0.7725	0.0105	2		0.6705	0.0135	2		0.677
5.267		0.8575	0.0045	2		0.676	0.103	2		0.791	0.012	2		0.8105	0.0165	2		0.485	0.041	2		0.5385	0.1275	2		0.7105	0.0095	2			5.267		0.757	0.032	2		0.6685	0.0015	2		0.7715	0.0105	2		0.6745	0.0175	2		0.678
5.283		0.856	0.003	2		0.6765	0.1015	2		0.791	0.015	2		0.8095	0.0165	2		0.4845	0.0435	2		0.5375	0.1265	2		0.7105	0.0085	2			5.283		0.761	0.032	2		0.669	0.001	2		0.7715	0.0105	2		0.674	0.018	2		0.6795
5.3		0.856	0.004	2		0.6715	0.1045	2		0.7915	0.0115	2		0.8085	0.0175	2		0.4795	0.0395	2		0.5355	0.1255	2		0.7105	0.0075	2			5.3		0.757	0.032	2		0.667	0.004	2		0.7685	0.0105	2		0.6685	0.0115	2		0.676
5.317		0.8545	0.0055	2		0.6705	0.1025	2		0.791	0.014	2		0.811	0.017	2		0.477	0.043	2		0.534	0.125	2		0.71	0.008	2			5.317		0.7575	0.0325	2		0.6705	0.0005	2		0.768	0.011	2		0.6725	0.0155	2		0.676
5.333		0.856	0.004	2		0.675	0.102	2		0.79	0.012	2		0.8095	0.0175	2		0.48	0.045	2		0.5305	0.1255	2		0.709	0.008	2			5.333		0.7575	0.0265	2		0.6685	0.0005	2		0.768	0.011	2		0.671	0.015	2		0.6765
5.35		0.8555	0.0035	2		0.676	0.101	2		0.7875	0.0105	2		0.8095	0.0165	2		0.4815	0.0465	2		0.532	0.126	2		0.708	0.009	2			5.35		0.756	0.03	2		0.6695	0.0005	2		0.767	0.01	2		0.672	0.015	2		0.677
5.367		0.8565	0.0025	2		0.675	0.103	2		0.789	0.012	2		0.811	0.016	2		0.479	0.046	2		0.5295	0.1245	2		0.709	0.009	2			5.367		0.757	0.032	2		0.6675	0.0025	2		0.7675	0.0105	2		0.6735	0.0175	2		0.6745
5.383		0.856	0.004	2		0.672	0.101	2		0.7885	0.0125	2		0.809	0.016	2		0.4775	0.0455	2		0.5275	0.1245	2		0.7085	0.0115	2			5.383		0.757	0.033	2		0.669	0.001	2		0.765	0.011	2		0.67	0.016	2		0.6755
5.4		0.858	0.004	2		0.6715	0.1035	2		0.79	0.012	2		0.8085	0.0165	2		0.475	0.045	2		0.524	0.127	2		0.709	0.01	2			5.4		0.755	0.03	2		0.669	0.001	2		0.7685	0.0105	2		0.673	0.019	2		0.678
5.417		0.856	0.002	2		0.6715	0.1015	2		0.788	0.012	2		0.8075	0.0165	2		0.476	0.047	2		0.5205	0.1235	2		0.7085	0.0105	2			5.417		0.755	0.031	2		0.668	0.004	2		0.767	0.01	2		0.668	0.014	2		0.676
5.433		0.856	0.004	2		0.672	0.104	2		0.787	0.013	2		0.8065	0.0165	2		0.474	0.046	2		0.519	0.124	2		0.7065	0.0075	2			5.433		0.757	0.032	2		0.669	0.003	2		0.768	0.011	2		0.672	0.016	2		0.6735
5.45		0.8555	0.0025	2		0.67	0.104	2		0.788	0.013	2		0.8065	0.0165	2		0.4725	0.0455	2		0.5175	0.1245	2		0.706	0.007	2			5.45		0.7545	0.0335	2		0.665	0.001	2		0.769	0.011	2		0.673	0.018	2		0.6745
5.467		0.855	0.003	2		0.672	0.103	2		0.7855	0.0125	2		0.806	0.016	2		0.472	0.049	2		0.5155	0.1225	2		0.706	0.009	2			5.467		0.757	0.031	2		0.6685	0.0045	2		0.767	0.01	2		0.6685	0.0165	2		0.676
5.483		0.8565	0.0015	2		0.671	0.102	2		0.787	0.012	2		0.805	0.018	2		0.4715	0.0495	2		0.512	0.124	2		0.7055	0.0095	2			5.483		0.7565	0.0305	2		0.6655	0.0005	2		0.7685	0.0085	2		0.6745	0.0215	2		0.673
5.5		0.854	0.005	2		0.6705	0.1055	2		0.7865	0.0105	2		0.8065	0.0175	2		0.468	0.049	2		0.5115	0.1235	2		0.7045	0.0105	2			5.5		0.756	0.031	2		0.6665	0.0035	2		0.766	0.011	2		0.666	0.014	2		0.6725
5.517		0.8545	0.0025	2		0.67	0.105	2		0.787	0.011	2		0.8085	0.0155	2		0.4685	0.0485	2		0.5085	0.1235	2		0.706	0.008	2			5.517		0.7525	0.0325	2		0.669	0.001	2		0.7645	0.0105	2		0.6705	0.0165	2		0.675
5.533		0.854	0.005	2		0.667	0.106	2		0.7865	0.0105	2		0.8075	0.0155	2		0.465	0.048	2		0.5045	0.1215	2		0.701	0.007	2			5.533		0.752	0.03	2		0.6675	0.0015	2		0.766	0.01	2		0.671	0.018	2		0.673
5.55		0.854	0.004	2		0.6695	0.1055	2		0.7855	0.0115	2		0.8055	0.0165	2		0.466	0.049	2		0.5055	0.1235	2		0.7025	0.0075	2			5.55		0.753	0.03	2		0.6695	0.0005	2		0.767	0.01	2		0.668	0.014	2		0.6725
5.567		0.85	0.001	2		0.6675	0.1055	2		0.7835	0.0115	2		0.806	0.016	2		0.464	0.049	2		0.503	0.121	2		0.703	0.008	2			5.567		0.754	0.03	2		0.6675	0.0005	2		0.772	0.011	2		0.6685	0.0165	2		0.6705
5.583		0.8515	0.0045	2		0.67	0.104	2		0.787	0.012	2		0.8035	0.0175	2		0.466	0.051	2		0.5015	0.1225	2		0.703	0.01	2			5.583		0.7565	0.0315	2		0.6675	0.0015	2		0.7665	0.0105	2		0.67	0.018	2		0.674
5.6		0.851	0.003	2		0.669	0.104	2		0.7815	0.0115	2		0.8045	0.0165	2		0.4645	0.0525	2		0.4995	0.1225	2		0.7025	0.0085	2			5.6		0.7555	0.0325	2		0.6665	0.0005	2		0.764	0.01	2		0.668	0.016	2		0.673
5.617		0.854	0.003	2		0.6655	0.1065	2		0.783	0.011	2		0.803	0.016	2		0.46	0.05	2		0.4975	0.1235	2		0.699	0.011	2			5.617		0.7545	0.0335	2		0.6675	0.0015	2		0.766	0.011	2		0.6695	0.0175	2		0.6725
5.633		0.8525	0.0035	2		0.667	0.107	2		0.7835	0.0115	2		0.801	0.018	2		0.461	0.051	2		0.496	0.122	2		0.6985	0.0075	2			5.633		0.753	0.033	2		0.6645	0.0025	2		0.765	0.011	2		0.6695	0.0155	2		0.669
5.65		0.852	0.003	2		0.6645	0.1075	2		0.783	0.013	2		0.803	0.017	2		0.4575	0.0505	2		0.4945	0.1215	2		0.701	0.009	2			5.65		0.756	0.033	2		0.6655	0.0015	2		0.7665	0.0105	2		0.667	0.014	2		0.6705
5.667		0.8525	0.0045	2		0.664	0.108	2		0.7805	0.0125	2		0.804	0.016	2		0.4565	0.0505	2		0.4915	0.1205	2		0.701	0.008	2			5.667		0.755	0.033	2		0.665	0	2		0.7675	0.0105	2		0.667	0.016	2		0.6735
5.683		0.853	0.003	2		0.662	0.107	2		0.78	0.012	2		0.8035	0.0155	2		0.4535	0.0515	2		0.4885	0.1205	2		0.6985	0.0095	2			5.683		0.7525	0.0305	2		0.6645	0.0005	2		0.7685	0.0105	2		0.6625	0.0125	2		0.6715
5.7		0.852	0.003	2		0.6635	0.1095	2		0.782	0.013	2		0.805	0.016	2		0.454	0.051	2		0.4855	0.1195	2		0.698	0.01	2			5.7		0.7545	0.0335	2		0.6645	0.0015	2		0.766	0.011	2		0.6695	0.0195	2		0.6725
5.717		0.8515	0.0045	2		0.6585	0.1085	2		0.78	0.012	2		0.802	0.016	2		0.4505	0.0495	2		0.4835	0.1195	2		0.6995	0.0085	2			5.717		0.754	0.033	2		0.661	0.003	2		0.765	0.011	2		0.6695	0.0185	2		0.6715
5.733		0.853	0.004	2		0.663	0.111	2		0.7795	0.0125	2		0.799	0.017	2		0.451	0.051	2		0.4825	0.1195	2		0.698	0.009	2			5.733		0.751	0.031	2		0.668	0.002	2		0.7655	0.0105	2		0.6705	0.0195	2		0.672
5.75		0.8535	0.0045	2		0.6555	0.1085	2		0.7775	0.0105	2		0.799	0.017	2		0.4475	0.0495	2		0.4785	0.1175	2		0.6975	0.0085	2			5.75		0.7515	0.0345	2		0.663	0.002	2		0.764	0.011	2		0.6645	0.0145	2		0.672
5.767		0.8535	0.0045	2		0.659	0.111	2		0.779	0.011	2		0.7985	0.0165	2		0.4475	0.0505	2		0.478	0.119	2		0.6965	0.0095	2			5.767		0.7515	0.0315	2		0.668	0.001	2		0.766	0.011	2		0.667	0.019	2		0.674
5.783		0.8515	0.0055	2		0.657	0.111	2		0.7805	0.0115	2		0.8005	0.0165	2		0.4455	0.0505	2		0.476	0.117	2		0.697	0.011	2			5.783		0.752	0.03	2		0.663	0.002	2		0.7615	0.0115	2		0.6675	0.0195	2		0.6725
5.8		0.8515	0.0045	2		0.657	0.111	2		0.779	0.011	2		0.797	0.017	2		0.444	0.051	2		0.473	0.119	2		0.697	0.01	2			5.8		0.753	0.031	2		0.6635	0.0015	2		0.7685	0.0105	2		0.665	0.016	2		0.671
5.817		0.8525	0.0055	2		0.6525	0.1125	2		0.779	0.01	2		0.7975	0.0165	2		0.441	0.048	2		0.4705	0.1175	2		0.693	0.008	2			5.817		0.752	0.031	2		0.664	0.001	2		0.76	0.011	2		0.6655	0.0165	2		0.6735
5.833		0.85	0.006	2		0.658	0.111	2		0.7795	0.0115	2		0.797	0.016	2		0.443	0.054	2		0.4695	0.1165	2		0.6915	0.0105	2			5.833		0.7505	0.0335	2		0.664	0.001	2		0.7635	0.0135	2		0.6715	0.0215	2		0.6745
5.85		0.8495	0.0055	2		0.6575	0.1125	2		0.7765	0.0105	2		0.799	0.015	2		0.442	0.053	2		0.4685	0.1185	2		0.694	0.01	2			5.85		0.7535	0.0315	2		0.664	0	2		0.765	0.01	2		0.666	0.019	2		0.673
5.867		0.8495	0.0045	2		0.655	0.11	2		0.7785	0.0115	2		0.7965	0.0165	2		0.4415	0.0525	2		0.4665	0.1165	2		0.6935	0.0115	2			5.867		0.7525	0.0335	2		0.6635	0.0005	2		0.766	0.01	2		0.6625	0.0145	2		0.672
5.883		0.8505	0.0055	2		0.654	0.111	2		0.777	0.011	2		0.7995	0.0155	2		0.4395	0.0535	2		0.463	0.118	2		0.692	0.009	2			5.883		0.7515	0.0355	2		0.6615	0.0025	2		0.7675	0.0095	2		0.669	0.021	2		0.6725
5.9		0.85	0.005	2		0.655	0.113	2		0.7775	0.0095	2		0.798	0.016	2		0.438	0.053	2		0.463	0.116	2		0.6925	0.0095	2			5.9		0.753	0.033	2		0.666	0.003	2		0.766	0.011	2		0.6665	0.0195	2		0.674
5.917		0.848	0.002	2		0.651	0.113	2		0.7775	0.0105	2		0.797	0.016	2		0.436	0.051	2		0.4595	0.1165	2		0.694	0.01	2			5.917		0.7535	0.0325	2		0.663	0.003	2		0.765	0.011	2		0.662	0.017	2		0.672
5.933		0.8475	0.0045	2		0.655	0.111	2		0.7775	0.0115	2		0.796	0.015	2		0.438	0.056	2		0.4585	0.1155	2		0.692	0.009	2			5.933		0.751	0.033	2		0.663	0	2		0.7655	0.0105	2		0.665	0.016	2		0.6715
5.95		0.8495	0.0035	2		0.654	0.113	2		0.7745	0.0095	2		0.796	0.017	2		0.435	0.055	2		0.4555	0.1135	2		0.692	0.01	2			5.95		0.751	0.034	2		0.662	0	2		0.764	0.011	2		0.661	0.012	2		0.6705
5.967		0.85	0.005	2		0.6545	0.1115	2		0.7735	0.0115	2		0.797	0.016	2		0.436	0.056	2		0.455	0.115	2		0.6925	0.0105	2			5.967		0.7515	0.0345	2		0.663	0.002	2		0.767	0.011	2		0.6645	0.0175	2		0.6705
5.983		0.85	0.005	2		0.651	0.112	2		0.773	0.013	2		0.7945	0.0165	2		0.433	0.055	2		0.4525	0.1145	2		0.693	0.01	2			5.983		0.7505	0.0325	2		0.661	0	2		0.761	0.011	2		0.662	0.017	2		0.67
6		0.848	0.005	2		0.6495	0.1135	2		0.7735	0.0125	2		0.797	0.015	2		0.4305	0.0535	2		0.4525	0.1115	2		0.6885	0.0095	2			6		0.7515	0.0315	2		0.6615	0.0015	2		0.763	0.011	2		0.6635	0.0165	2		0.671
6.017		0.849	0.005	2		0.649	0.112	2		0.7745	0.0135	2		0.7945	0.0155	2		0.4315	0.0545	2		0.449	0.112	2		0.6905	0.0105	2			6.017		0.752	0.033	2		0.663	0.002	2		0.765	0.011	2		0.662	0.015	2		0.6695
6.033		0.848	0.006	2		0.6505	0.1145	2		0.7725	0.0135	2		0.7965	0.0155	2		0.4305	0.0545	2		0.448	0.113	2		0.689	0.009	2			6.033		0.7535	0.0345	2		0.665	0.007	2		0.762	0.007	2		0.6655	0.0185	2		0.6705
6.05		0.8485	0.0055	2		0.6485	0.1135	2		0.773	0.014	2		0.7945	0.0155	2		0.4285	0.0555	2		0.444	0.112	2		0.6875	0.0095	2			6.05		0.7495	0.0335	2		0.6595	0.0025	2		0.7605	0.0115	2		0.664	0.018	2		0.6685
6.067		0.847	0.006	2		0.6505	0.1125	2		0.771	0.012	2		0.7955	0.0165	2		0.43	0.056	2		0.4425	0.1115	2		0.688	0.01	2			6.067		0.75	0.03	2		0.6655	0.0035	2		0.759	0.01	2		0.663	0.017	2		0.6685
6.083		0.8485	0.0055	2		0.6475	0.1125	2		0.7725	0.0125	2		0.7925	0.0155	2		0.4275	0.0565	2		0.441	0.111	2		0.6895	0.0095	2			6.083		0.7505	0.0315	2		0.6585	0.0015	2		0.7595	0.0105	2		0.6635	0.0205	2		0.6695
6.1		0.848	0.007	2		0.649	0.112	2		0.77	0.013	2		0.7925	0.0155	2		0.4265	0.0585	2		0.4385	0.1115	2		0.686	0.009	2			6.1		0.749	0.029	2		0.6595	0.0005	2		0.7605	0.0105	2		0.6615	0.0165	2		0.6675
6.117		0.8465	0.0065	2		0.646	0.112	2		0.768	0.012	2		0.791	0.016	2		0.4255	0.0565	2		0.437	0.11	2		0.687	0.01	2			6.117		0.752	0.03	2		0.662	0.005	2		0.763	0.013	2		0.6615	0.0185	2		0.666
6.133		0.8455	0.0065	2		0.646	0.113	2		0.771	0.012	2		0.793	0.016	2		0.424	0.057	2		0.433	0.109	2		0.6875	0.0095	2			6.133		0.75	0.033	2		0.665	0.003	2		0.7655	0.0095	2		0.6635	0.0195	2		0.668
6.15		0.8465	0.0075	2		0.6465	0.1115	2		0.7685	0.0135	2		0.79	0.016	2		0.424	0.059	2		0.4335	0.1105	2		0.6875	0.0105	2			6.15		0.748	0.031	2		0.6615	0.0005	2		0.763	0.011	2		0.6635	0.0175	2		0.6675
6.167		0.843	0.008	2		0.647	0.112	2		0.7695	0.0115	2		0.7935	0.0145	2		0.424	0.059	2		0.4305	0.1075	2		0.685	0.011	2			6.167		0.748	0.031	2		0.664	0.004	2		0.761	0.011	2		0.66	0.016	2		0.6655
6.183		0.845	0.007	2		0.647	0.113	2		0.7675	0.0105	2		0.792	0.016	2		0.423	0.059	2		0.43	0.109	2		0.6855	0.0095	2			6.183		0.747	0.032	2		0.6615	0.0035	2		0.7615	0.0115	2		0.662	0.019	2		0.665
6.2		0.8475	0.0065	2		0.646	0.114	2		0.7695	0.0095	2		0.7905	0.0165	2		0.4215	0.0585	2		0.427	0.109	2		0.684	0.011	2			6.2		0.749	0.034	2		0.6605	0.0015	2		0.7615	0.0115	2		0.6585	0.0155	2		0.6675
6.217		0.8465	0.0065	2		0.644	0.112	2		0.769	0.011	2		0.7895	0.0155	2		0.419	0.061	2		0.426	0.108	2		0.6865	0.0095	2			6.217		0.7475	0.0335	2		0.659	0.001	2		0.7615	0.0095	2		0.662	0.018	2		0.666
6.233		0.847	0.008	2		0.6425	0.1135	2		0.7655	0.0135	2		0.788	0.017	2		0.418	0.059	2		0.423	0.107	2		0.684	0.011	2			6.233		0.75	0.031	2		0.661	0.005	2		0.76	0.01	2		0.664	0.02	2		0.6645
6.25		0.8465	0.0085	2		0.642	0.113	2		0.765	0.012	2		0.7885	0.0165	2		0.416	0.06	2		0.422	0.107	2		0.684	0.011	2			6.25		0.7475	0.0335	2		0.6595	0.0005	2		0.759	0.011	2		0.6595	0.0185	2		0.6675
6.267		0.844	0.007	2		0.6415	0.1145	2		0.764	0.014	2		0.7875	0.0175	2		0.415	0.06	2		0.42	0.106	2		0.6845	0.0125	2			6.267		0.75	0.034	2		0.656	0.001	2		0.765	0.011	2		0.661	0.02	2		0.6675
6.283		0.8445	0.0085	2		0.6405	0.1145	2		0.768	0.013	2		0.788	0.017	2		0.4125	0.0605	2		0.418	0.107	2		0.6845	0.0115	2			6.283		0.747	0.034	2		0.663	0.001	2		0.758	0.01	2		0.6595	0.0165	2		0.6655
6.3		0.843	0.007	2		0.6395	0.1145	2		0.766	0.011	2		0.7895	0.0165	2		0.4125	0.0595	2		0.416	0.106	2		0.6805	0.0115	2			6.3		0.748	0.034	2		0.6595	0.0005	2		0.759	0.01	2		0.66	0.018	2		0.664
6.317		0.8435	0.0085	2		0.6415	0.1155	2		0.7655	0.0125	2		0.788	0.016	2		0.4125	0.0605	2		0.4145	0.1055	2		0.682	0.011	2			6.317		0.749	0.034	2		0.658	0	2		0.761	0.009	2		0.6615	0.0175	2		0.6675
6.333		0.8435	0.0075	2		0.639	0.115	2		0.763	0.013	2		0.787	0.016	2		0.4105	0.0615	2		0.412	0.104	2		0.6805	0.0115	2			6.333		0.7475	0.0325	2		0.659	0.002	2		0.762	0.009	2		0.665	0.024	2		0.6645
6.35		0.8445	0.0075	2		0.6395	0.1155	2		0.7645	0.0125	2		0.786	0.017	2		0.409	0.062	2		0.411	0.104	2		0.6805	0.0115	2			6.35		0.7475	0.0325	2		0.658	0.002	2		0.762	0.013	2		0.6595	0.0185	2		0.664
6.367		0.844	0.007	2		0.6335	0.1155	2		0.7645	0.0105	2		0.787	0.016	2		0.406	0.058	2		0.4085	0.1035	2		0.6785	0.0115	2			6.367		0.7495	0.0325	2		0.659	0.002	2		0.7625	0.0115	2		0.662	0.021	2		0.665
6.383		0.844	0.004	2		0.638	0.113	2		0.763	0.013	2		0.786	0.016	2		0.409	0.063	2		0.4065	0.1025	2		0.6805	0.0115	2			6.383		0.7495	0.0305	2		0.66	0.006	2		0.7615	0.0115	2		0.6625	0.0195	2		0.6635
6.4		0.846	0.006	2		0.6375	0.1155	2		0.7645	0.0125	2		0.7865	0.0155	2		0.407	0.062	2		0.4035	0.1015	2		0.681	0.011	2			6.4		0.7455	0.0315	2		0.6595	0.0005	2		0.7605	0.0115	2		0.6585	0.0165	2		0.664
6.417		0.845	0.008	2		0.6405	0.1155	2		0.763	0.013	2		0.7855	0.0155	2		0.408	0.065	2		0.403	0.102	2		0.6815	0.0125	2			6.417		0.7455	0.0305	2		0.661	0.002	2		0.7615	0.0115	2		0.663	0.02	2		0.662
6.433		0.8435	0.0085	2		0.6405	0.1135	2		0.7615	0.0125	2		0.7845	0.0165	2		0.4085	0.0665	2		0.401	0.101	2		0.677	0.01	2			6.433		0.7455	0.0325	2		0.658	0.002	2		0.7605	0.0115	2		0.6635	0.0235	2		0.663
6.45		0.8405	0.0075	2		0.641	0.112	2		0.7625	0.0125	2		0.786	0.016	2		0.4085	0.0675	2		0.399	0.101	2		0.6775	0.0105	2			6.45		0.746	0.036	2		0.6545	0.0025	2		0.7605	0.0105	2		0.6605	0.0195	2		0.6615
6.467		0.843	0.007	2		0.64	0.115	2		0.7615	0.0125	2		0.7865	0.0155	2		0.406	0.066	2		0.3975	0.1005	2		0.679	0.012	2			6.467		0.746	0.031	2		0.6545	0.0015	2		0.7605	0.0115	2		0.661	0.023	2		0.6645
6.483		0.8425	0.0075	2		0.639	0.114	2		0.7605	0.0115	2		0.7885	0.0145	2		0.406	0.067	2		0.3945	0.1005	2		0.677	0.012	2			6.483		0.7455	0.0305	2		0.6595	0.0055	2		0.761	0.011	2		0.6565	0.0175	2		0.662
6.5		0.843	0.009	2		0.6375	0.1165	2		0.7615	0.0115	2		0.785	0.015	2		0.402	0.065	2		0.3925	0.0995	2		0.6775	0.0135	2			6.5		0.746	0.031	2		0.6575	0.0025	2		0.76	0.011	2		0.657	0.015	2		0.664
6.517		0.844	0.007	2		0.6365	0.1145	2		0.76	0.012	2		0.786	0.016	2		0.4025	0.0665	2		0.392	0.099	2		0.6765	0.0135	2			6.517		0.746	0.033	2		0.6585	0.0025	2		0.761	0.011	2		0.658	0.019	2		0.6625
6.533		0.843	0.008	2		0.6365	0.1145	2		0.7595	0.0135	2		0.783	0.016	2		0.4025	0.0665	2		0.3905	0.0985	2		0.677	0.011	2			6.533		0.747	0.032	2		0.659	0.003	2		0.761	0.011	2		0.6615	0.0225	2		0.663
6.55		0.8415	0.0075	2		0.6345	0.1135	2		0.76	0.011	2		0.7835	0.0155	2		0.401	0.067	2		0.388	0.097	2		0.6745	0.0125	2			6.55		0.7455	0.0335	2		0.6565	0.0035	2		0.7615	0.0105	2		0.6565	0.0175	2		0.6635
6.567		0.841	0.006	2		0.636	0.114	2		0.7605	0.0135	2		0.781	0.017	2		0.401	0.068	2		0.385	0.096	2		0.6735	0.0125	2			6.567		0.7465	0.0315	2		0.658	0.005	2		0.7625	0.0105	2		0.6585	0.0195	2		0.665
6.583		0.84	0.007	2		0.6335	0.1135	2		0.7575	0.0135	2		0.782	0.017	2		0.399	0.067	2		0.383	0.096	2		0.677	0.011	2			6.583		0.747	0.031	2		0.6585	0.0055	2		0.7615	0.0115	2		0.6625	0.0235	2		0.662
6.6		0.8415	0.0085	2		0.631	0.118	2		0.757	0.014	2		0.7845	0.0155	2		0.3945	0.0635	2		0.382	0.096	2		0.6745	0.0155	2			6.6		0.748	0.031	2		0.6575	0.0025	2		0.7645	0.0105	2		0.6565	0.0205	2		0.663
6.617		0.8415	0.0085	2		0.6335	0.1165	2		0.7575	0.0125	2		0.783	0.015	2		0.3965	0.0665	2		0.381	0.094	2		0.675	0.013	2			6.617		0.7485	0.0325	2		0.6565	0.0015	2		0.761	0.011	2		0.6635	0.0245	2		0.6645
6.633		0.839	0.007	2		0.631	0.117	2		0.7575	0.0135	2		0.782	0.016	2		0.395	0.065	2		0.378	0.093	2		0.674	0.013	2			6.633		0.7455	0.0285	2		0.659	0.005	2		0.76	0.01	2		0.659	0.022	2		0.6625
6.65		0.839	0.007	2		0.6285	0.1155	2		0.7575	0.0115	2		0.7815	0.0165	2		0.3935	0.0655	2		0.3755	0.0935	2		0.673	0.012	2			6.65		0.748	0.032	2		0.656	0.002	2		0.762	0.011	2		0.658	0.02	2		0.659
6.667		0.8395	0.0085	2		0.628	0.117	2		0.7575	0.0125	2		0.7775	0.0175	2		0.391	0.066	2		0.374	0.094	2		0.6735	0.0125	2			6.667		0.748	0.03	2		0.6555	0.0035	2		0.7565	0.0105	2		0.6555	0.0175	2		0.663
6.683		0.8405	0.0075	2		0.6295	0.1165	2		0.7585	0.0145	2		0.78	0.016	2		0.3925	0.0665	2		0.373	0.093	2		0.6725	0.0105	2			6.683		0.7455	0.0285	2		0.658	0.006	2		0.7595	0.0095	2		0.655	0.019	2		0.6625
6.7		0.839	0.009	2		0.6295	0.1165	2		0.7535	0.0105	2		0.7795	0.0155	2		0.3915	0.0675	2		0.371	0.092	2		0.669	0.009	2			6.7		0.744	0.033	2		0.6535	0.0045	2		0.7595	0.0135	2		0.657	0.02	2		0.666
6.717		0.8415	0.0085	2		0.6305	0.1165	2		0.7555	0.0125	2		0.78	0.016	2		0.391	0.068	2		0.3675	0.0905	2		0.6695	0.0115	2			6.717		0.7435	0.0315	2		0.6575	0.0025	2		0.758	0.011	2		0.657	0.02	2		0.662
6.733		0.8395	0.0065	2		0.632	0.116	2		0.7545	0.0135	2		0.7815	0.0155	2		0.392	0.07	2		0.3675	0.0915	2		0.6725	0.0135	2			6.733		0.7465	0.0325	2		0.659	0.005	2		0.76	0.012	2		0.654	0.018	2		0.658
6.75		0.8405	0.0055	2		0.6275	0.1165	2		0.7535	0.0155	2		0.7775	0.0155	2		0.389	0.068	2		0.365	0.09	2		0.6725	0.0115	2			6.75		0.748	0.032	2		0.657	0.002	2		0.7595	0.0105	2		0.66	0.022	2		0.663
6.767		0.841	0.007	2		0.63	0.118	2		0.7545	0.0135	2		0.7805	0.0155	2		0.388	0.07	2		0.363	0.09	2		0.671	0.012	2			6.767		0.743	0.031	2		0.655	0.003	2		0.7595	0.0125	2		0.6625	0.0245	2		0.662
6.783		0.8395	0.0065	2		0.6285	0.1175	2		0.7525	0.0145	2		0.779	0.015	2		0.3875	0.0685	2		0.361	0.088	2		0.671	0.011	2			6.783		0.7455	0.0325	2		0.655	0.003	2		0.7605	0.0105	2		0.656	0.019	2		0.665
6.8		0.84	0.008	2		0.6265	0.1185	2		0.7515	0.0135	2		0.7765	0.0165	2		0.3855	0.0675	2		0.3605	0.0885	2		0.6705	0.0115	2			6.8		0.7405	0.0355	2		0.6555	0.0025	2		0.757	0.011	2		0.6545	0.0175	2		0.6615
6.817		0.838	0.009	2		0.625	0.117	2		0.751	0.012	2		0.7785	0.0165	2		0.385	0.068	2		0.3575	0.0885	2		0.668	0.011	2			6.817		0.7435	0.0325	2		0.656	0.005	2		0.756	0.011	2		0.6555	0.0175	2		0.66
6.833		0.8375	0.0065	2		0.624	0.117	2		0.751	0.014	2		0.7775	0.0165	2		0.3845	0.0675	2		0.357	0.089	2		0.668	0.013	2			6.833		0.7425	0.0345	2		0.6555	0.0065	2		0.7575	0.0115	2		0.6625	0.0265	2		0.6595
6.85		0.8385	0.0095	2		0.6265	0.1165	2		0.7495	0.0155	2		0.775	0.017	2		0.385	0.07	2		0.3545	0.0885	2		0.6695	0.0135	2			6.85		0.747	0.036	2		0.6545	0.0035	2		0.759	0.012	2		0.6555	0.0195	2		0.66
6.867		0.84	0.008	2		0.623	0.118	2		0.7515	0.0145	2		0.7785	0.0155	2		0.3825	0.0675	2		0.3525	0.0865	2		0.669	0.011	2			6.867		0.7445	0.0325	2		0.657	0.005	2		0.759	0.011	2		0.6545	0.0195	2		0.66
6.883		0.8355	0.0085	2		0.624	0.121	2		0.751	0.013	2		0.774	0.017	2		0.381	0.067	2		0.3515	0.0865	2		0.669	0.012	2			6.883		0.7435	0.0345	2		0.6525	0.0025	2		0.755	0.011	2		0.6555	0.0205	2		0.659
6.9		0.837	0.01	2		0.626	0.119	2		0.7505	0.0135	2		0.775	0.016	2		0.382	0.07	2		0.3505	0.0865	2		0.666	0.013	2			6.9		0.747	0.033	2		0.652	0.001	2		0.7575	0.0105	2		0.655	0.02	2		0.66
6.917		0.838	0.008	2		0.6245	0.1195	2		0.751	0.012	2		0.7765	0.0165	2		0.38	0.07	2		0.348	0.085	2		0.667	0.012	2			6.917		0.744	0.034	2		0.656	0.006	2		0.7625	0.0105	2		0.6555	0.0215	2		0.6575
6.933		0.8385	0.0075	2		0.6245	0.1205	2		0.7505	0.0145	2		0.7755	0.0175	2		0.38	0.069	2		0.347	0.085	2		0.664	0.012	2			6.933		0.7455	0.0325	2		0.6555	0.0025	2		0.755	0.011	2		0.6545	0.0195	2		0.6585
6.95		0.838	0.008	2		0.6245	0.1205	2		0.749	0.014	2		0.7745	0.0165	2		0.379	0.07	2		0.3455	0.0845	2		0.6655	0.0125	2			6.95		0.7455	0.0335	2		0.6535	0.0015	2		0.757	0.01	2		0.653	0.019	2		0.6575
6.967		0.838	0.009	2		0.621	0.119	2		0.748	0.015	2		0.774	0.017	2		0.3775	0.0695	2		0.343	0.083	2		0.6635	0.0145	2			6.967		0.7445	0.0325	2		0.655	0.004	2		0.7595	0.0085	2		0.652	0.018	2		0.6585
6.983		0.836	0.009	2		0.62	0.121	2		0.747	0.015	2		0.7735	0.0175	2		0.376	0.068	2		0.3415	0.0835	2		0.6645	0.0135	2			6.983		0.7435	0.0335	2		0.6555	0.0075	2		0.7605	0.0115	2		0.6555	0.0215	2		0.656
7		0.8375	0.0075	2		0.6235	0.1215	2		0.746	0.015	2		0.775	0.016	2		0.376	0.071	2		0.34	0.083	2		0.6665	0.0135	2			7		0.742	0.032	2		0.656	0.005	2		0.7685	0.0105	2		0.6515	0.0175	2		0.6585
7.017		0.8385	0.0075	2		0.621	0.122	2		0.7475	0.0145	2		0.774	0.016	2		0.374	0.07	2		0.337	0.081	2		0.6655	0.0135	2			7.017		0.7435	0.0345	2		0.6545	0.0035	2		0.758	0.011	2		0.653	0.017	2		0.656
7.033		0.838	0.008	2		0.6205	0.1215	2		0.747	0.013	2		0.7725	0.0165	2		0.374	0.069	2		0.3345	0.0795	2		0.6635	0.0135	2			7.033		0.7435	0.0335	2		0.6545	0.0035	2		0.759	0.012	2		0.6575	0.0235	2		0.657
7.05		0.838	0.009	2		0.62	0.122	2		0.747	0.016	2		0.772	0.016	2		0.372	0.07	2		0.334	0.08	2		0.6625	0.0135	2			7.05		0.7425	0.0325	2		0.655	0.005	2		0.7585	0.0115	2		0.6575	0.0235	2		0.6575
7.067		0.837	0.01	2		0.6185	0.1215	2		0.7445	0.0135	2		0.771	0.016	2		0.372	0.07	2		0.332	0.078	2		0.664	0.012	2			7.067		0.7445	0.0325	2		0.6555	0.0035	2		0.7595	0.0115	2		0.652	0.019	2		0.6575
7.083		0.8385	0.0075	2		0.619	0.123	2		0.7455	0.0135	2		0.769	0.016	2		0.371	0.069	2		0.3305	0.0785	2		0.6635	0.0105	2			7.083		0.744	0.032	2		0.658	0.005	2		0.7585	0.0085	2		0.653	0.02	2		0.6585
7.1		0.836	0.008	2		0.6195	0.1215	2		0.7465	0.0125	2		0.7705	0.0165	2		0.3705	0.0715	2		0.3275	0.0765	2		0.662	0.011	2			7.1		0.7425	0.0345	2		0.6555	0.0065	2		0.757	0.012	2		0.659	0.025	2		0.6525
7.117		0.8365	0.0085	2		0.621	0.121	2		0.746	0.014	2		0.7715	0.0165	2		0.372	0.072	2		0.327	0.076	2		0.6615	0.0115	2			7.117		0.7395	0.0305	2		0.654	0.004	2		0.756	0.011	2		0.6525	0.0185	2		0.656
7.133		0.837	0.008	2		0.62	0.121	2		0.742	0.015	2		0.77	0.016	2		0.3715	0.0715	2		0.324	0.077	2		0.662	0.014	2			7.133		0.7425	0.0335	2		0.6515	0.0045	2		0.758	0.011	2		0.6525	0.0225	2		0.6545
7.15		0.839	0.008	2		0.618	0.121	2		0.744	0.013	2		0.7685	0.0165	2		0.3695	0.0715	2		0.3235	0.0755	2		0.659	0.013	2			7.15		0.742	0.034	2		0.6525	0.0045	2		0.75	0.011	2		0.6515	0.0205	2		0.6565
7.167		0.8345	0.0065	2		0.6165	0.1235	2		0.741	0.015	2		0.77	0.018	2		0.3665	0.0705	2		0.3215	0.0755	2		0.66	0.013	2			7.167		0.7445	0.0325	2		0.6525	0.0045	2		0.753	0.012	2		0.6505	0.0205	2		0.6545
7.183		0.836	0.008	2		0.618	0.124	2		0.743	0.015	2		0.7695	0.0165	2		0.366	0.071	2		0.321	0.075	2		0.66	0.011	2			7.183		0.7435	0.0315	2		0.651	0.003	2		0.7545	0.0115	2		0.653	0.02	2		0.654
7.2		0.836	0.009	2		0.616	0.124	2		0.7415	0.0155	2		0.771	0.017	2		0.3645	0.0705	2		0.319	0.074	2		0.659	0.014	2			7.2		0.742	0.033	2		0.6565	0.0045	2		0.7575	0.0115	2		0.6515	0.0205	2		0.6545
7.217		0.8335	0.0055	2		0.613	0.125	2		0.744	0.014	2		0.7675	0.0175	2		0.3625	0.0685	2		0.3175	0.0735	2		0.6585	0.0135	2			7.217		0.741	0.033	2		0.6535	0.0045	2		0.7575	0.0095	2		0.6555	0.0225	2		0.655
7.233		0.833	0.011	2		0.6155	0.1255	2		0.741	0.013	2		0.7695	0.0165	2		0.3625	0.0705	2		0.3155	0.0735	2		0.6605	0.0135	2			7.233		0.742	0.033	2		0.654	0.002	2		0.757	0.013	2		0.654	0.023	2		0.6535
7.25		0.836	0.008	2		0.6135	0.1255	2		0.7425	0.0145	2		0.77	0.016	2		0.362	0.069	2		0.314	0.072	2		0.6575	0.0125	2			7.25		0.7405	0.0345	2		0.655	0.002	2		0.763	0.011	2		0.655	0.023	2		0.652
7.267		0.837	0.008	2		0.614	0.125	2		0.7425	0.0135	2		0.767	0.017	2		0.3615	0.0715	2		0.312	0.073	2		0.657	0.013	2			7.267		0.7435	0.0325	2		0.6545	0.0035	2		0.759	0.011	2		0.6565	0.0245	2		0.6555
7.283		0.8335	0.0095	2		0.61	0.124	2		0.742	0.015	2		0.7675	0.0175	2		0.359	0.07	2		0.311	0.071	2		0.6555	0.0115	2			7.283		0.7415	0.0305	2		0.6535	0.0045	2		0.762	0.011	2		0.651	0.019	2		0.6545
7.3		0.8345	0.0075	2		0.6115	0.1255	2		0.743	0.013	2		0.7685	0.0165	2		0.3595	0.0695	2		0.309	0.07	2		0.6545	0.0125	2			7.3		0.743	0.03	2		0.655	0.005	2		0.763	0.011	2		0.657	0.025	2		0.6535
7.317		0.834	0.009	2		0.612	0.124	2		0.74	0.013	2		0.767	0.017	2		0.3595	0.0715	2		0.308	0.07	2		0.6565	0.0145	2			7.317		0.7405	0.0325	2		0.654	0.004	2		0.7585	0.0105	2		0.6505	0.0195	2		0.6525
7.333		0.833	0.007	2		0.612	0.124	2		0.7415	0.0135	2		0.768	0.017	2		0.359	0.072	2		0.3055	0.0675	2		0.655	0.014	2			7.333		0.737	0.032	2		0.6515	0.0045	2		0.758	0.013	2		0.6515	0.0205	2		0.655
7.35		0.8335	0.0055	2		0.611	0.126	2		0.74	0.016	2		0.7675	0.0175	2		0.3565	0.0705	2		0.3025	0.0675	2		0.6535	0.0145	2			7.35		0.7445	0.0335	2		0.6545	0.0045	2		0.758	0.009	2		0.652	0.022	2		0.652
7.367		0.836	0.006	2		0.611	0.126	2		0.7405	0.0125	2		0.764	0.017	2		0.3565	0.0715	2		0.3015	0.0665	2		0.6545	0.0135	2			7.367		0.743	0.035	2		0.649	0.003	2		0.752	0.011	2		0.6495	0.0195	2		0.6535
7.383		0.8325	0.0065	2		0.6105	0.1245	2		0.739	0.012	2		0.767	0.016	2		0.3565	0.0725	2		0.301	0.067	2		0.652	0.014	2			7.383		0.7425	0.0335	2		0.648	0.007	2		0.7535	0.0115	2		0.653	0.022	2		0.652
7.4		0.8345	0.0085	2		0.608	0.124	2		0.7395	0.0125	2		0.767	0.016	2		0.3555	0.0715	2		0.2985	0.0665	2		0.6535	0.0145	2			7.4		0.738	0.031	2		0.653	0.006	2		0.754	0.011	2		0.6565	0.0245	2		0.6525
7.417		0.8335	0.0075	2		0.61	0.125	2		0.7365	0.0125	2		0.7625	0.0175	2		0.3555	0.0715	2		0.297	0.065	2		0.655	0.014	2			7.417		0.741	0.032	2		0.6525	0.0045	2		0.7555	0.0115	2		0.656	0.028	2		0.6525
7.433		0.8325	0.0075	2		0.611	0.124	2		0.738	0.016	2		0.7655	0.0165	2		0.356	0.074	2		0.2955	0.0635	2		0.654	0.013	2			7.433		0.74	0.033	2		0.6555	0.0085	2		0.759	0.011	2		0.655	0.026	2		0.6495
7.45		0.8315	0.0085	2		0.6085	0.1255	2		0.7365	0.0155	2		0.7655	0.0165	2		0.353	0.073	2		0.294	0.064	2		0.6505	0.0145	2			7.45		0.742	0.032	2		0.6505	0.0015	2		0.7545	0.0115	2		0.6545	0.0255	2		0.6495
7.467		0.833	0.008	2		0.607	0.126	2		0.7365	0.0125	2		0.7625	0.0175	2		0.3515	0.0715	2		0.2925	0.0625	2		0.6525	0.0135	2			7.467		0.739	0.029	2		0.6495	0.0025	2		0.754	0.012	2		0.651	0.022	2		0.6505
7.483		0.833	0.008	2		0.6105	0.1235	2		0.7365	0.0135	2		0.7615	0.0185	2		0.3545	0.0755	2		0.29	0.062	2		0.6505	0.0145	2			7.483		0.7365	0.0315	2		0.652	0.005	2		0.7575	0.0105	2		0.651	0.024	2		0.6525
7.5		0.8365	0.0085	2		0.6075	0.1245	2		0.737	0.015	2		0.766	0.016	2		0.352	0.073	2		0.2885	0.0615	2		0.65	0.014	2			7.5		0.738	0.034	2		0.653	0.005	2		0.7575	0.0115	2		0.653	0.025	2		0.652
7.517		0.8345	0.0085	2		0.6065	0.1245	2		0.7345	0.0145	2		0.7625	0.0175	2		0.351	0.073	2		0.287	0.061	2		0.6505	0.0145	2			7.517		0.7395	0.0315	2		0.6505	0.0055	2		0.756	0.009	2		0.6525	0.0245	2		0.649
7.533		0.8325	0.0105	2		0.605	0.127	2		0.7345	0.0115	2		0.764	0.017	2		0.348	0.072	2		0.2865	0.0605	2		0.6525	0.0135	2			7.533		0.7395	0.0335	2		0.6535	0.0085	2		0.7545	0.0115	2		0.655	0.025	2		0.6495
7.55		0.8275	0.0115	2		0.6055	0.1245	2		0.734	0.013	2		0.7615	0.0175	2		0.349	0.074	2		0.286	0.06	2		0.651	0.015	2			7.55		0.7365	0.0325	2		0.6515	0.0005	2		0.757	0.011	2		0.652	0.024	2		0.649
7.567		0.8305	0.0085	2		0.605	0.126	2		0.7345	0.0125	2		0.7595	0.0185	2		0.3485	0.0725	2		0.283	0.059	2		0.65	0.014	2			7.567		0.7385	0.0325	2		0.6535	0.0025	2		0.759	0.011	2		0.6475	0.0205	2		0.651
7.583		0.831	0.008	2		0.6045	0.1265	2		0.734	0.012	2		0.7605	0.0175	2		0.3465	0.0735	2		0.281	0.058	2		0.6495	0.0145	2			7.583		0.7415	0.0315	2		0.6545	0.0075	2		0.7585	0.0115	2		0.653	0.026	2		0.6505
7.6		0.83	0.007	2		0.6065	0.1265	2		0.737	0.013	2		0.762	0.016	2		0.348	0.074	2		0.2805	0.0575	2		0.6505	0.0155	2			7.6		0.74	0.032	2		0.652	0.003	2		0.7595	0.0115	2		0.649	0.021	2		0.649
7.617		0.828	0.006	2		0.6055	0.1275	2		0.736	0.012	2		0.761	0.016	2		0.346	0.074	2		0.279	0.057	2		0.6475	0.0155	2			7.617		0.738	0.032	2		0.649	0.003	2		0.76	0.012	2		0.653	0.024	2		0.6475
7.633		0.829	0.008	2		0.605	0.127	2		0.734	0.013	2		0.761	0.017	2		0.345	0.075	2		0.276	0.056	2		0.6485	0.0135	2			7.633		0.7395	0.0325	2		0.653	0.003	2		0.76	0.009	2		0.6535	0.0235	2		0.649
7.65		0.831	0.007	2		0.6035	0.1285	2		0.735	0.014	2		0.7605	0.0165	2		0.344	0.073	2		0.276	0.056	2		0.6485	0.0145	2			7.65		0.7405	0.0325	2		0.653	0.004	2		0.758	0.012	2		0.6475	0.0225	2		0.6465
7.667		0.8305	0.0075	2		0.604	0.128	2		0.733	0.013	2		0.7615	0.0155	2		0.3435	0.0745	2		0.2745	0.0545	2		0.648	0.014	2			7.667		0.74	0.031	2		0.6525	0.0045	2		0.758	0.011	2		0.652	0.027	2		0.6485
7.683		0.832	0.006	2		0.6055	0.1265	2		0.733	0.014	2		0.758	0.018	2		0.3445	0.0765	2		0.2725	0.0535	2		0.648	0.015	2			7.683		0.7395	0.0335	2		0.653	0.004	2		0.757	0.01	2		0.654	0.027	2		0.648
7.7		0.829	0.007	2		0.6055	0.1295	2		0.734	0.013	2		0.757	0.018	2		0.343	0.075	2		0.27	0.053	2		0.648	0.015	2			7.7		0.741	0.031	2		0.6515	0.0045	2		0.758	0.011	2		0.647	0.021	2		0.649
7.717		0.8275	0.0065	2		0.6025	0.1275	2		0.732	0.013	2		0.76	0.017	2		0.342	0.075	2		0.269	0.054	2		0.647	0.014	2			7.717		0.7405	0.0315	2		0.651	0.002	2		0.7575	0.0105	2		0.652	0.025	2		0.647
7.733		0.829	0.007	2		0.606	0.128	2		0.7325	0.0135	2		0.76	0.017	2		0.343	0.077	2		0.268	0.051	2		0.647	0.015	2			7.733		0.738	0.032	2		0.653	0.003	2		0.7595	0.0115	2		0.6505	0.0245	2		0.648
7.75		0.832	0.008	2		0.6	0.128	2		0.728	0.014	2		0.7585	0.0165	2		0.3405	0.0735	2		0.266	0.05	2		0.6455	0.0145	2			7.75		0.736	0.031	2		0.6535	0.0065	2		0.7575	0.0105	2		0.646	0.022	2		0.647
7.767		0.83	0.01	2		0.5985	0.1285	2		0.731	0.013	2		0.758	0.017	2		0.338	0.074	2		0.265	0.051	2		0.644	0.014	2			7.767		0.735	0.034	2		0.652	0.006	2		0.759	0.011	2		0.649	0.024	2		0.6475
7.783		0.831	0.01	2		0.6035	0.1285	2		0.7285	0.0105	2		0.755	0.018	2		0.3405	0.0765	2		0.263	0.05	2		0.645	0.014	2			7.783		0.7385	0.0315	2		0.6495	0.0015	2		0.7595	0.0105	2		0.648	0.022	2		0.6485
7.8		0.83	0.008	2		0.602	0.129	2		0.729	0.013	2		0.756	0.018	2		0.3395	0.0755	2		0.261	0.049	2		0.645	0.014	2			7.8		0.74	0.032	2		0.6515	0.0045	2		0.756	0.012	2		0.6485	0.0235	2		0.6465
7.817		0.8275	0.0085	2		0.5995	0.1285	2		0.7285	0.0115	2		0.757	0.017	2		0.3375	0.0745	2		0.2615	0.0485	2		0.6435	0.0155	2			7.817		0.738	0.033	2		0.6495	0.0085	2		0.7575	0.0105	2		0.6525	0.0255	2		0.644
7.833		0.8275	0.0115	2		0.5995	0.1315	2		0.73	0.014	2		0.7595	0.0165	2		0.3355	0.0735	2		0.2595	0.0475	2		0.6435	0.0165	2			7.833		0.7365	0.0325	2		0.65	0.005	2		0.7585	0.0115	2		0.649	0.025	2		0.644
7.85		0.8275	0.0115	2		0.6025	0.1295	2		0.728	0.012	2		0.7555	0.0175	2		0.3375	0.0765	2		0.2575	0.0475	2		0.6445	0.0175	2			7.85		0.738	0.029	2		0.6485	0.0055	2		0.757	0.01	2		0.652	0.027	2		0.6475
7.867		0.8255	0.0085	2		0.5985	0.1295	2		0.73	0.012	2		0.755	0.017	2		0.3345	0.0745	2		0.2565	0.0465	2		0.643	0.015	2			7.867		0.7345	0.0315	2		0.6485	0.0035	2		0.7565	0.0115	2		0.646	0.02	2		0.648
7.883		0.8255	0.0105	2		0.598	0.131	2		0.729	0.013	2		0.756	0.017	2		0.334	0.073	2		0.256	0.046	2		0.643	0.015	2			7.883		0.735	0.03	2		0.6495	0.0035	2		0.757	0.012	2		0.6495	0.0265	2		0.646
7.9		0.825	0.011	2		0.5965	0.1305	2		0.7275	0.0145	2		0.756	0.018	2		0.333	0.074	2		0.2535	0.0455	2		0.642	0.015	2			7.9		0.7365	0.0325	2		0.6505	0.0045	2		0.761	0.011	2		0.6505	0.0245	2		0.6465
7.917		0.8255	0.0095	2		0.5975	0.1305	2		0.728	0.015	2		0.7565	0.0165	2		0.333	0.075	2		0.2525	0.0445	2		0.6415	0.0155	2			7.917		0.734	0.035	2		0.651	0.004	2		0.7565	0.0115	2		0.647	0.023	2		0.646
7.933		0.8295	0.0095	2		0.5975	0.1315	2		0.727	0.014	2		0.754	0.017	2		0.333	0.074	2		0.25	0.043	2		0.642	0.016	2			7.933		0.7375	0.0325	2		0.6525	0.0065	2		0.757	0.011	2		0.647	0.024	2		0.6455
7.95		0.826	0.009	2		0.596	0.13	2		0.7265	0.0135	2		0.756	0.017	2		0.332	0.075	2		0.2505	0.0435	2		0.641	0.018	2			7.95		0.7335	0.0315	2		0.6505	0.0055	2		0.757	0.011	2		0.647	0.024	2		0.649
7.967		0.8265	0.0095	2		0.594	0.131	2		0.724	0.013	2		0.7555	0.0175	2		0.3305	0.0735	2		0.2485	0.0435	2		0.639	0.016	2			7.967		0.737	0.033	2		0.656	0.002	2		0.758	0.011	2		0.6455	0.0235	2		0.645
7.983		0.8275	0.0085	2		0.5935	0.1295	2		0.7265	0.0115	2		0.753	0.016	2		0.3305	0.0745	2		0.2475	0.0425	2		0.6385	0.0145	2			7.983		0.738	0.031	2		0.648	0.005	2		0.754	0.011	2		0.6445	0.0215	2		0.642
8		0.8275	0.0105	2		0.5925	0.1305	2		0.7245	0.0125	2		0.754	0.017	2		0.3285	0.0735	2		0.245	0.042	2		0.64	0.015	2			8		0.736	0.028	2		0.6505	0.0055	2		0.756	0.01	2		0.6455	0.0225	2		0.6455
8.017		0.827	0.007	2		0.5945	0.1305	2		0.7255	0.0135	2		0.7545	0.0165	2		0.3285	0.0755	2		0.244	0.04	2		0.638	0.013	2			8.017		0.737	0.031	2		0.6515	0.0025	2		0.757	0.011	2		0.6455	0.0225	2		0.644
8.033		0.8275	0.0095	2		0.592	0.132	2		0.7235	0.0145	2		0.754	0.016	2		0.327	0.073	2		0.242	0.039	2		0.6395	0.0155	2			8.033		0.735	0.03	2		0.652	0.003	2		0.758	0.011	2		0.6475	0.0265	2		0.6405
8.05		0.8275	0.0085	2		0.594	0.131	2		0.724	0.013	2		0.7535	0.0165	2		0.3275	0.0755	2		0.24	0.04	2		0.6385	0.0155	2			8.05		0.734	0.032	2		0.653	0.003	2		0.76	0.011	2		0.6415	0.0205	2		0.644
8.067		0.8255	0.0085	2		0.5945	0.1305	2		0.724	0.012	2		0.7515	0.0175	2		0.328	0.076	2		0.24	0.038	2		0.6385	0.0145	2			8.067		0.739	0.033	2		0.65	0.004	2		0.759	0.011	2		0.6445	0.0225	2		0.643
8.083		0.8255	0.0095	2		0.592	0.13	2		0.724	0.012	2		0.7495	0.0175	2		0.3275	0.0755	2		0.238	0.038	2		0.637	0.014	2			8.083		0.7345	0.0325	2		0.6515	0.0035	2		0.76	0.011	2		0.644	0.021	2		0.644
8.1		0.8245	0.0135	2		0.593	0.132	2		0.7215	0.0115	2		0.753	0.017	2		0.3255	0.0755	2		0.2375	0.0365	2		0.634	0.015	2			8.1		0.7365	0.0325	2		0.649	0.005	2		0.756	0.011	2		0.6495	0.0285	2		0.64
8.117		0.823	0.011	2		0.5925	0.1315	2		0.722	0.011	2		0.752	0.017	2		0.326	0.076	2		0.2355	0.0365	2		0.6375	0.0155	2			8.117		0.7345	0.0335	2		0.6495	0.0065	2		0.761	0.011	2		0.644	0.022	2		0.6435
8.133		0.825	0.011	2		0.595	0.131	2		0.7245	0.0115	2		0.752	0.017	2		0.327	0.078	2		0.235	0.036	2		0.6365	0.0145	2			8.133		0.7325	0.0315	2		0.652	0.005	2		0.7525	0.0115	2		0.643	0.022	2		0.641
8.15		0.824	0.011	2		0.594	0.131	2		0.7235	0.0105	2		0.751	0.017	2		0.3255	0.0775	2		0.233	0.035	2		0.636	0.016	2			8.15		0.735	0.033	2		0.65	0.006	2		0.757	0.011	2		0.6435	0.0215	2		0.642
8.167		0.826	0.012	2		0.593	0.129	2		0.721	0.012	2		0.753	0.016	2		0.3255	0.0785	2		0.232	0.035	2		0.636	0.014	2			8.167		0.7325	0.0335	2		0.65	0.004	2		0.7585	0.0105	2		0.643	0.024	2		0.639
8.183		0.825	0.011	2		0.5905	0.1315	2		0.7205	0.0095	2		0.7505	0.0165	2		0.3235	0.0755	2		0.2305	0.0345	2		0.636	0.015	2			8.183		0.7335	0.0305	2		0.647	0	2		0.755	0.011	2		0.6475	0.0275	2		0.64
8.2		0.8225	0.0105	2		0.59	0.13	2		0.7215	0.0125	2		0.75	0.017	2		0.3225	0.0775	2		0.23	0.033	2		0.635	0.015	2			8.2		0.734	0.032	2		0.647	0.002	2		0.7525	0.0115	2		0.6485	0.0295	2		0.6405
8.217		0.8245	0.0115	2		0.5895	0.1315	2		0.7205	0.0135	2		0.7505	0.0175	2		0.3215	0.0765	2		0.228	0.033	2		0.6345	0.0155	2			8.217		0.731	0.034	2		0.649	0.003	2		0.7565	0.0085	2		0.6435	0.0225	2		0.6425
8.233		0.823	0.01	2		0.5885	0.1305	2		0.719	0.012	2		0.7495	0.0165	2		0.321	0.076	2		0.2265	0.0325	2		0.635	0.015	2			8.233		0.734	0.034	2		0.6475	0.0005	2		0.758	0.012	2		0.6435	0.0245	2		0.639
8.25		0.824	0.01	2		0.59	0.131	2		0.7175	0.0105	2		0.749	0.016	2		0.321	0.077	2		0.225	0.032	2		0.6345	0.0145	2			8.25		0.737	0.032	2		0.6435	0.0035	2		0.7595	0.0125	2		0.6415	0.0215	2		0.642
8.267		0.824	0.01	2		0.5895	0.1305	2		0.7175	0.0105	2		0.7485	0.0155	2		0.3215	0.0775	2		0.224	0.032	2		0.6355	0.0165	2			8.267		0.734	0.033	2		0.6485	0.0025	2		0.758	0.01	2		0.6405	0.0225	2		0.6395
8.283		0.825	0.01	2		0.586	0.131	2		0.7195	0.0135	2		0.7455	0.0175	2		0.3195	0.0755	2		0.2225	0.0305	2		0.633	0.018	2			8.283		0.7335	0.0295	2		0.648	0.005	2		0.7585	0.0095	2		0.6485	0.0275	2		0.6385
8.3		0.825	0.009	2		0.5885	0.1295	2		0.718	0.014	2		0.748	0.017	2		0.3205	0.0785	2		0.222	0.03	2		0.634	0.017	2			8.3		0.7345	0.0315	2		0.648	0.003	2		0.7575	0.0115	2		0.65	0.029	2		0.6375
8.317		0.823	0.009	2		0.585	0.131	2		0.7165	0.0145	2		0.748	0.017	2		0.318	0.076	2		0.2205	0.0295	2		0.633	0.015	2			8.317		0.734	0.033	2		0.6485	0.0055	2		0.757	0.011	2		0.6455	0.0275	2		0.64
8.333		0.824	0.009	2		0.591	0.129	2		0.7165	0.0115	2		0.7485	0.0165	2		0.3215	0.0805	2		0.219	0.029	2		0.6315	0.0155	2			8.333		0.733	0.032	2		0.6475	0.0035	2		0.756	0.011	2		0.639	0.023	2		0.6385
8.35		0.824	0.009	2		0.5855	0.1325	2		0.718	0.01	2		0.7455	0.0175	2		0.317	0.076	2		0.2175	0.0285	2		0.6325	0.0155	2			8.35		0.731	0.036	2		0.6455	0.0005	2		0.756	0.011	2		0.6415	0.0235	2		0.6405
8.367		0.8205	0.0105	2		0.589	0.13	2		0.719	0.013	2		0.747	0.017	2		0.319	0.08	2		0.216	0.027	2		0.6305	0.0165	2			8.367		0.7335	0.0315	2		0.646	0.003	2		0.756	0.011	2		0.6435	0.0235	2		0.639
8.383		0.823	0.01	2		0.59	0.129	2		0.717	0.013	2		0.745	0.017	2		0.3205	0.0805	2		0.2155	0.0265	2		0.6325	0.0165	2			8.383		0.7325	0.0285	2		0.647	0.004	2		0.756	0.011	2		0.644	0.025	2		0.636
8.4		0.8205	0.0115	2		0.588	0.13	2		0.716	0.012	2		0.745	0.017	2		0.318	0.079	2		0.214	0.026	2		0.6315	0.0155	2			8.4		0.732	0.031	2		0.6465	0.0045	2		0.754	0.011	2		0.6475	0.0285	2		0.6395
8.417		0.8215	0.0125	2		0.5875	0.1305	2		0.7175	0.0115	2		0.748	0.016	2		0.317	0.08	2		0.2135	0.0255	2		0.633	0.015	2			8.417		0.731	0.034	2		0.65	0.005	2		0.7555	0.0105	2		0.6415	0.0235	2		0.6425
8.433		0.8225	0.0105	2		0.5865	0.1315	2		0.7155	0.0115	2		0.747	0.017	2		0.317	0.078	2		0.212	0.025	2		0.629	0.016	2			8.433		0.7315	0.0355	2		0.6485	0.0055	2		0.756	0.011	2		0.64	0.021	2		0.6405
8.45		0.823	0.011	2		0.5895	0.1295	2		0.7155	0.0125	2		0.747	0.017	2		0.3185	0.0815	2		0.211	0.025	2		0.63	0.017	2			8.45		0.7335	0.0335	2		0.649	0.005	2		0.7535	0.0105	2		0.6415	0.0225	2		0.6415
8.467		0.8225	0.0115	2		0.5855	0.1295	2		0.7145	0.0115	2		0.7455	0.0165	2		0.316	0.079	2		0.21	0.023	2		0.6285	0.0185	2			8.467		0.729	0.034	2		0.6455	0.0055	2		0.7545	0.0105	2		0.648	0.029	2		0.641
8.483		0.821	0.011	2		0.5855	0.1315	2		0.7145	0.0115	2		0.7445	0.0165	2		0.3145	0.0785	2		0.2085	0.0235	2		0.6295	0.0165	2			8.483		0.734	0.033	2		0.645	0.003	2		0.755	0.011	2		0.6415	0.0245	2		0.6395
8.5		0.8195	0.0115	2		0.585	0.132	2		0.714	0.011	2		0.747	0.017	2		0.3145	0.0775	2		0.2075	0.0235	2		0.626	0.016	2			8.5		0.7315	0.0335	2		0.6475	0.0025	2		0.757	0.011	2		0.6425	0.0265	2		0.6395
8.517		0.8205	0.0105	2		0.5845	0.1335	2		0.714	0.012	2		0.7435	0.0165	2		0.3125	0.0775	2		0.2065	0.0225	2		0.6285	0.0165	2			8.517		0.733	0.031	2		0.6465	0.0045	2		0.7565	0.0115	2		0.6435	0.0285	2		0.639
8.533		0.822	0.01	2		0.584	0.133	2		0.712	0.012	2		0.7435	0.0155	2		0.311	0.078	2		0.205	0.022	2		0.628	0.018	2			8.533		0.7305	0.0335	2		0.6495	0.0045	2		0.756	0.011	2		0.6405	0.0225	2		0.6425
8.55		0.8205	0.0095	2		0.5815	0.1325	2		0.713	0.01	2		0.747	0.016	2		0.311	0.077	2		0.2035	0.0215	2		0.6285	0.0165	2			8.55		0.73	0.03	2		0.645	0.004	2		0.755	0.012	2		0.64	0.023	2		0.6395
8.567		0.821	0.013	2		0.582	0.132	2		0.7125	0.0125	2		0.7445	0.0165	2		0.311	0.078	2		0.203	0.02	2		0.6255	0.0155	2			8.567		0.733	0.033	2		0.6465	0.0055	2		0.7555	0.0115	2		0.645	0.026	2		0.64
8.583		0.8205	0.0095	2		0.5795	0.1315	2		0.711	0.013	2		0.7405	0.0175	2		0.31	0.077	2		0.2025	0.0215	2		0.626	0.015	2			8.583		0.733	0.031	2		0.6445	0.0025	2		0.7545	0.0115	2		0.6415	0.0255	2		0.6375
8.6		0.821	0.011	2		0.5815	0.1315	2		0.713	0.012	2		0.7435	0.0165	2		0.311	0.078	2		0.2015	0.0205	2		0.626	0.016	2			8.6		0.731	0.034	2		0.646	0.004	2		0.7535	0.0095	2		0.6425	0.0265	2		0.638
8.617		0.821	0.011	2		0.5805	0.1325	2		0.711	0.013	2		0.7435	0.0155	2		0.309	0.078	2		0.1995	0.0205	2		0.625	0.019	2			8.617		0.73	0.03	2		0.6445	0.0035	2		0.753	0.013	2		0.6425	0.0255	2		0.6375
8.633		0.8225	0.0125	2		0.5795	0.1335	2		0.7105	0.0115	2		0.743	0.017	2		0.3085	0.0765	2		0.199	0.019	2		0.625	0.016	2			8.633		0.733	0.031	2		0.6445	0.0055	2		0.7585	0.0115	2		0.6365	0.0205	2		0.6435
8.65		0.8215	0.0095	2		0.581	0.133	2		0.711	0.011	2		0.7405	0.0175	2		0.3085	0.0785	2		0.1975	0.0175	2		0.626	0.017	2			8.65		0.7285	0.0305	2		0.6425	0.0045	2		0.7555	0.0115	2		0.644	0.029	2		0.6405
8.667		0.8215	0.0095	2		0.578	0.134	2		0.712	0.012	2		0.7415	0.0165	2		0.306	0.076	2		0.1965	0.0175	2		0.6235	0.0165	2			8.667		0.734	0.031	2		0.6435	0.0015	2		0.754	0.012	2		0.643	0.029	2		0.644
8.683		0.818	0.01	2		0.581	0.131	2		0.7115	0.0125	2		0.741	0.017	2		0.309	0.08	2		0.1945	0.0165	2		0.625	0.018	2			8.683		0.734	0.032	2		0.647	0.004	2		0.755	0.012	2		0.638	0.023	2		0.636
8.7		0.817	0.012	2		0.5805	0.1315	2		0.7115	0.0125	2		0.74	0.017	2		0.308	0.079	2		0.1945	0.0155	2		0.6235	0.0165	2			8.7		0.7325	0.0325	2		0.644	0	2		0.756	0.011	2		0.6455	0.0315	2		0.64
8.717		0.818	0.011	2		0.578	0.129	2		0.7105	0.0125	2		0.7405	0.0165	2		0.3075	0.0795	2		0.193	0.016	2		0.624	0.018	2			8.717		0.731	0.032	2		0.6465	0.0025	2		0.7555	0.0115	2		0.6435	0.0285	2		0.6425
8.733		0.818	0.013	2		0.5795	0.1305	2		0.7085	0.0105	2		0.739	0.017	2		0.308	0.08	2		0.1925	0.0155	2		0.623	0.017	2			8.733		0.7345	0.0335	2		0.6455	0.0035	2		0.756	0.011	2		0.641	0.026	2		0.64
8.75		0.818	0.012	2		0.58	0.131	2		0.71	0.01	2		0.7395	0.0165	2		0.307	0.081	2		0.1905	0.0145	2		0.6215	0.0165	2			8.75		0.7305	0.0325	2		0.6475	0.0055	2		0.7555	0.0135	2		0.64	0.022	2		0.639
8.767		0.82	0.01	2		0.579	0.132	2		0.709	0.01	2		0.741	0.017	2		0.307	0.079	2		0.1895	0.0145	2		0.62	0.016	2			8.767		0.7295	0.0345	2		0.6455	0.0025	2		0.7535	0.0115	2		0.637	0.023	2		0.6405
8.783		0.8195	0.0125	2		0.5805	0.1325	2		0.7085	0.0085	2		0.7395	0.0165	2		0.3065	0.0805	2		0.1895	0.0145	2		0.6175	0.0155	2			8.783		0.7285	0.0325	2		0.6455	0.0035	2		0.7545	0.0115	2		0.6375	0.0235	2		0.6415
8.8		0.8185	0.0095	2		0.5765	0.1335	2		0.707	0.012	2		0.7405	0.0165	2		0.303	0.078	2		0.188	0.014	2		0.6215	0.0175	2			8.8		0.7265	0.0295	2		0.6445	0.0045	2		0.7575	0.0115	2		0.6405	0.0245	2		0.6415
8.817		0.817	0.011	2		0.5775	0.1315	2		0.7085	0.0115	2		0.738	0.017	2		0.304	0.08	2		0.187	0.013	2		0.6215	0.0175	2			8.817		0.7265	0.0355	2		0.642	0.002	2		0.7565	0.0115	2		0.64	0.026	2		0.641
8.833		0.8195	0.0115	2		0.576	0.133	2		0.707	0.013	2		0.7385	0.0175	2		0.3025	0.0785	2		0.1865	0.0125	2		0.621	0.016	2			8.833		0.7305	0.0305	2		0.6415	0.0035	2		0.7545	0.0115	2		0.6415	0.0255	2		0.638
8.85		0.82	0.011	2		0.576	0.134	2		0.706	0.014	2		0.74	0.016	2		0.3015	0.0775	2		0.186	0.012	2		0.6205	0.0165	2			8.85		0.729	0.034	2		0.6465	0.0015	2		0.753	0.01	2		0.641	0.027	2		0.6415
8.867		0.8195	0.0125	2		0.575	0.133	2		0.7065	0.0125	2		0.738	0.016	2		0.3	0.079	2		0.1845	0.0115	2		0.622	0.018	2			8.867		0.731	0.033	2		0.6425	0.0005	2		0.7555	0.0115	2		0.638	0.024	2		0.641
8.883		0.819	0.01	2		0.5765	0.1355	2		0.707	0.014	2		0.7385	0.0165	2		0.301	0.078	2		0.1835	0.0115	2		0.6185	0.0175	2			8.883		0.73	0.035	2		0.6445	0.0055	2		0.7505	0.0105	2		0.6385	0.0255	2		0.639
8.9		0.819	0.011	2		0.575	0.134	2		0.7065	0.0135	2		0.7375	0.0165	2		0.3015	0.0775	2		0.183	0.011	2		0.6185	0.0185	2			8.9		0.728	0.03	2		0.648	0.005	2		0.751	0.011	2		0.641	0.028	2		0.643
8.917		0.818	0.011	2		0.574	0.135	2		0.7065	0.0115	2		0.735	0.017	2		0.2995	0.0775	2		0.182	0.01	2		0.618	0.019	2			8.917		0.7335	0.0315	2		0.646	0.006	2		0.7545	0.0125	2		0.643	0.029	2		0.6385
8.933		0.8195	0.0115	2		0.5745	0.1335	2		0.7055	0.0115	2		0.7385	0.0165	2		0.3	0.079	2		0.181	0.01	2		0.617	0.018	2			8.933		0.732	0.03	2		0.6455	0.0045	2		0.7555	0.0115	2		0.6395	0.0255	2		0.6395
8.95		0.819	0.01	2		0.576	0.134	2		0.7065	0.0125	2		0.739	0.017	2		0.3005	0.0795	2		0.18	0.01	2		0.6185	0.0175	2			8.95		0.7285	0.0295	2		0.644	0.007	2		0.755	0.01	2		0.6365	0.0225	2		0.6425
8.967		0.8165	0.0095	2		0.573	0.133	2		0.7035	0.0125	2		0.7365	0.0175	2		0.299	0.079	2		0.1785	0.0095	2		0.6185	0.0185	2			8.967		0.7325	0.0315	2		0.642	0.002	2		0.757	0.012	2		0.6365	0.0215	2		0.6405
8.983		0.8165	0.0095	2		0.5735	0.1345	2		0.706	0.012	2		0.7355	0.0175	2		0.2975	0.0785	2		0.1775	0.0085	2		0.6185	0.0175	2			8.983		0.729	0.033	2		0.645	0.004	2		0.755	0.012	2		0.638	0.025	2		0.6405
9		0.8155	0.0095	2		0.5725	0.1355	2		0.7065	0.0115	2		0.7335	0.0175	2		0.2965	0.0775	2		0.177	0.007	2		0.618	0.016	2			9		0.732	0.035	2		0.645	0.001	2		0.755	0.01	2		0.6385	0.0255	2		0.6405
9.017		0.816	0.01	2		0.574	0.135	2		0.7065	0.0125	2		0.7355	0.0165	2		0.2975	0.0795	2		0.1755	0.0075	2		0.6155	0.0145	2			9.017		0.7305	0.0315	2		0.646	0.004	2		0.7545	0.0105	2		0.6425	0.0285	2		0.6415
9.033		0.8165	0.0095	2		0.5725	0.1345	2		0.703	0.012	2		0.733	0.018	2		0.297	0.079	2		0.1755	0.0065	2		0.616	0.016	2			9.033		0.729	0.033	2		0.6435	0.0055	2		0.752	0.011	2		0.64	0.028	2		0.6425
9.05		0.817	0.01	2		0.571	0.136	2		0.706	0.011	2		0.7345	0.0165	2		0.295	0.077	2		0.1735	0.0065	2		0.617	0.017	2			9.05		0.73	0.033	2		0.6425	0.0025	2		0.755	0.009	2		0.6355	0.0225	2		0.6395
9.067		0.817	0.012	2		0.574	0.134	2		0.7025	0.0125	2		0.734	0.016	2		0.2965	0.0805	2		0.1735	0.0065	2		0.615	0.018	2			9.067		0.7295	0.0315	2		0.645	0.005	2		0.754	0.014	2		0.6365	0.0245	2		0.6395
9.083		0.815	0.01	2		0.5695	0.1355	2		0.7005	0.0135	2		0.7315	0.0175	2		0.2935	0.0775	2		0.172	0.006	2		0.6155	0.0175	2			9.083		0.7285	0.0305	2		0.641	0.002	2		0.752	0.012	2		0.6405	0.0305	2		0.6375
9.1		0.8145	0.0085	2		0.5715	0.1355	2		0.703	0.013	2		0.73	0.017	2		0.295	0.079	2		0.171	0.006	2		0.614	0.016	2			9.1		0.7275	0.0355	2		0.6425	0.0035	2		0.753	0.012	2		0.639	0.028	2		0.6435
9.117		0.8175	0.0105	2		0.571	0.133	2		0.702	0.012	2		0.7325	0.0165	2		0.296	0.079	2		0.171	0.005	2		0.614	0.017	2			9.117		0.7275	0.0285	2		0.642	0.005	2		0.7555	0.0125	2		0.6375	0.0265	2		0.642
9.133		0.8175	0.0125	2		0.5705	0.1355	2		0.7025	0.0135	2		0.7305	0.0165	2		0.2935	0.0785	2		0.1705	0.0045	2		0.6145	0.0175	2			9.133		0.73	0.031	2		0.6415	0.0035	2		0.754	0.01	2		0.639	0.027	2		0.6425
9.15		0.8185	0.0105	2		0.571	0.136	2		0.7005	0.0145	2		0.7355	0.0165	2		0.2935	0.0785	2		0.1695	0.0045	2		0.615	0.016	2			9.15		0.7285	0.0345	2		0.6445	0.0045	2		0.7535	0.0125	2		0.6375	0.0255	2		0.6395
9.167		0.815	0.012	2		0.5695	0.1365	2		0.7015	0.0125	2		0.7305	0.0165	2		0.2915	0.0775	2		0.168	0.004	2		0.6145	0.0175	2			9.167		0.728	0.036	2		0.645	0.007	2		0.755	0.011	2		0.635	0.024	2		0.6405
9.183		0.816	0.011	2		0.571	0.135	2		0.7005	0.0105	2		0.7335	0.0165	2		0.293	0.08	2		0.1675	0.0045	2		0.6125	0.0195	2			9.183		0.729	0.032	2		0.643	0.004	2		0.756	0.011	2		0.639	0.029	2		0.641
9.2		0.8165	0.0105	2		0.5705	0.1345	2		0.6995	0.0105	2		0.733	0.017	2		0.2935	0.0805	2		0.1665	0.0035	2		0.6105	0.0165	2			9.2		0.729	0.032	2		0.6465	0.0035	2		0.7535	0.0115	2		0.6335	0.0235	2		0.64
9.217		0.8145	0.0105	2		0.57	0.134	2		0.7005	0.0105	2		0.731	0.017	2		0.293	0.08	2		0.166	0.003	2		0.611	0.018	2			9.217		0.7305	0.0335	2		0.6415	0.0035	2		0.7545	0.0115	2		0.638	0.029	2		0.6445
9.233		0.8155	0.0095	2		0.569	0.136	2		0.6975	0.0105	2		0.7315	0.0165	2		0.2915	0.0785	2		0.1655	0.0015	2		0.6105	0.0165	2			9.233		0.7295	0.0315	2		0.6425	0.0035	2		0.75	0.011	2		0.636	0.026	2		0.6395
9.25		0.8155	0.0105	2		0.568	0.135	2		0.7	0.012	2		0.73	0.017	2		0.2915	0.0785	2		0.164	0.002	2		0.6115	0.0155	2			9.25		0.7285	0.0305	2		0.6405	0.0045	2		0.7535	0.0115	2		0.6365	0.0275	2		0.6375
9.267		0.815	0.012	2		0.5655	0.1345	2		0.7015	0.0115	2		0.7315	0.0165	2		0.2895	0.0775	2		0.1635	0.0015	2		0.6095	0.0175	2			9.267		0.726	0.034	2		0.6415	0.0035	2		0.752	0.011	2		0.6385	0.0295	2		0.639
9.283		0.8155	0.0095	2		0.569	0.136	2		0.7	0.01	2		0.7275	0.0175	2		0.291	0.079	2		0.163	0.001	2		0.6115	0.0185	2			9.283		0.7315	0.0295	2		0.6395	0.0025	2		0.7505	0.0105	2		0.637	0.026	2		0.6395
9.3		0.8135	0.0095	2		0.567	0.137	2		0.6995	0.0115	2		0.73	0.017	2		0.289	0.078	2		0.162	0	2		0.6085	0.0185	2			9.3		0.727	0.03	2		0.643	0.005	2		0.7515	0.0115	2		0.637	0.028	2		0.642
9.317		0.8135	0.0125	2		0.567	0.136	2		0.698	0.012	2		0.729	0.018	2		0.2895	0.0785	2		0.16	0	2		0.611	0.02	2			9.317		0.7285	0.0275	2		0.641	0	2		0.749	0.011	2		0.639	0.03	2		0.6415
9.333		0.8165	0.0115	2		0.565	0.135	2		0.6985	0.0115	2		0.73	0.017	2		0.288	0.078	2		0.16	0	2		0.611	0.019	2			9.333		0.728	0.035	2		0.6405	0.0055	2		0.75	0.011	2		0.634	0.026	2		0.6395
9.35		0.8155	0.0115	2		0.5685	0.1355	2		0.697	0.013	2		0.7275	0.0165	2		0.289	0.08	2		0.1595	0.0005	2		0.609	0.018	2			9.35		0.73	0.032	2		0.6435	0.0075	2		0.752	0.011	2		0.635	0.026	2		0.642
9.367		0.814	0.012	2		0.567	0.135	2		0.6975	0.0125	2		0.726	0.018	2		0.289	0.08	2		0.159	0.001	2		0.61	0.018	2			9.367		0.729	0.034	2		0.644	0.007	2		0.752	0.011	2		0.637	0.029	2		0.641
9.383		0.815	0.01	2		0.567	0.137	2		0.6975	0.0095	2		0.729	0.016	2		0.2885	0.0785	2		0.158	0.001	2		0.6095	0.0165	2			9.383		0.731	0.03	2		0.641	0.003	2		0.754	0.011	2		0.6385	0.0295	2		0.64
9.4		0.8155	0.0125	2		0.5655	0.1365	2		0.6975	0.0145	2		0.7285	0.0165	2		0.2875	0.0785	2		0.157	0.001	2		0.607	0.018	2			9.4		0.7255	0.0325	2		0.644	0.005	2		0.7515	0.0115	2		0.639	0.028	2		0.639
9.417		0.8145	0.0105	2		0.565	0.139	2		0.696	0.013	2		0.7255	0.0185	2		0.2855	0.0775	2		0.1565	0.0015	2		0.608	0.019	2			9.417		0.7245	0.0325	2		0.6435	0.0055	2		0.755	0.011	2		0.636	0.029	2		0.641
9.433		0.814	0.012	2		0.564	0.137	2		0.698	0.011	2		0.7265	0.0175	2		0.285	0.078	2		0.1565	0.0015	2		0.606	0.02	2			9.433		0.727	0.033	2		0.641	0.003	2		0.752	0.011	2		0.631	0.022	2		0.641
9.45		0.8135	0.0105	2		0.5675	0.1385	2		0.694	0.011	2		0.724	0.018	2		0.2865	0.0795	2		0.155	0.002	2		0.6045	0.0185	2			9.45		0.7265	0.0335	2		0.6365	0.0035	2		0.7485	0.0125	2		0.636	0.027	2		0.6405
9.467		0.8135	0.0135	2		0.5665	0.1365	2		0.694	0.011	2		0.7245	0.0175	2		0.286	0.08	2		0.1545	0.0025	2		0.6045	0.0175	2			9.467		0.7295	0.0305	2		0.642	0.002	2		0.7455	0.0115	2		0.637	0.028	2		0.639
9.483		0.814	0.012	2		0.5635	0.1375	2		0.695	0.011	2		0.7255	0.0175	2		0.284	0.078	2		0.153	0.003	2		0.6055	0.0175	2			9.483		0.726	0.032	2		0.6395	0.0035	2		0.748	0.011	2		0.6355	0.0265	2		0.6355
9.5		0.8145	0.0135	2		0.561	0.138	2		0.695	0.012	2		0.7265	0.0165	2		0.2825	0.0765	2		0.1535	0.0035	2		0.606	0.017	2			9.5		0.729	0.03	2		0.642	0.004	2		0.749	0.012	2		0.6365	0.0275	2		0.6395
9.517		0.8145	0.0125	2		0.562	0.137	2		0.693	0.013	2		0.726	0.017	2		0.283	0.078	2		0.1525	0.0035	2		0.604	0.018	2			9.517		0.7305	0.0285	2		0.6415	0.0065	2		0.7505	0.0115	2		0.6375	0.0285	2		0.639
9.533		0.8145	0.0135	2		0.564	0.137	2		0.6945	0.0115	2		0.726	0.017	2		0.284	0.08	2		0.1515	0.0035	2		0.604	0.018	2			9.533		0.7305	0.0305	2		0.6425	0.0065	2		0.75	0.012	2		0.636	0.029	2		0.641
9.55		0.8145	0.0125	2		0.5625	0.1355	2		0.6935	0.0105	2		0.726	0.017	2		0.2835	0.0795	2		0.151	0.004	2		0.604	0.019	2			9.55		0.7255	0.0305	2		0.6385	0.0015	2		0.7515	0.0115	2		0.6365	0.0285	2		0.6385
9.567		0.815	0.011	2		0.561	0.135	2		0.694	0.011	2		0.725	0.017	2		0.283	0.079	2		0.15	0.004	2		0.6035	0.0165	2			9.567		0.7265	0.0335	2		0.6425	0.0055	2		0.752	0.011	2		0.633	0.024	2		0.6385
9.583		0.814	0.013	2		0.561	0.137	2		0.695	0.013	2		0.7245	0.0175	2		0.2815	0.0785	2		0.15	0.004	2		0.6035	0.0195	2			9.583		0.727	0.034	2		0.638	0.001	2		0.753	0.011	2		0.6345	0.0275	2		0.6355
9.6		0.8125	0.0125	2		0.5615	0.1355	2		0.693	0.011	2		0.7255	0.0165	2		0.2825	0.0795	2		0.149	0.005	2		0.604	0.017	2			9.6		0.727	0.031	2		0.638	0.004	2		0.7495	0.0115	2		0.6365	0.0295	2		0.64
9.617		0.813	0.011	2		0.5605	0.1375	2		0.692	0.011	2		0.7255	0.0165	2		0.281	0.078	2		0.1485	0.0055	2		0.6035	0.0175	2			9.617		0.7265	0.0315	2		0.6405	0.0025	2		0.7485	0.0115	2		0.637	0.028	2		0.642
9.633		0.813	0.012	2		0.56	0.136	2		0.693	0.012	2		0.7235	0.0165	2		0.2815	0.0785	2		0.148	0.006	2		0.6025	0.0175	2			9.633		0.7275	0.0325	2		0.636	0.004	2		0.748	0.011	2		0.636	0.03	2		0.6365
9.65		0.8135	0.0115	2		0.561	0.136	2		0.693	0.013	2		0.7225	0.0175	2		0.281	0.08	2		0.1465	0.0055	2		0.6015	0.0195	2			9.65		0.73	0.029	2		0.6405	0.0035	2		0.7505	0.0115	2		0.635	0.028	2		0.6375
9.667		0.813	0.013	2		0.56	0.136	2		0.6915	0.0125	2		0.7245	0.0165	2		0.2805	0.0795	2		0.1465	0.0065	2		0.6	0.019	2			9.667		0.7285	0.0325	2		0.639	0.006	2		0.75	0.011	2		0.6365	0.0325	2		0.639
9.683		0.814	0.01	2		0.5585	0.1355	2		0.6925	0.0115	2		0.7235	0.0155	2		0.28	0.079	2		0.146	0.006	2		0.6025	0.0195	2			9.683		0.7235	0.0295	2		0.6385	0.0065	2		0.75	0.012	2		0.637	0.03	2		0.636
9.7		0.813	0.012	2		0.559	0.137	2		0.6935	0.0115	2		0.7225	0.0165	2		0.279	0.079	2		0.145	0.006	2		0.6005	0.0185	2			9.7		0.724	0.03	2		0.6425	0.0045	2		0.7485	0.0125	2		0.637	0.032	2		0.637
9.717		0.811	0.011	2		0.56	0.135	2		0.69	0.012	2		0.722	0.016	2		0.281	0.081	2		0.1445	0.0075	2		0.6015	0.0175	2			9.717		0.7285	0.0305	2		0.642	0.007	2		0.748	0.012	2		0.6375	0.0325	2		0.638
9.733		0.812	0.012	2		0.557	0.137	2		0.6905	0.0115	2		0.7215	0.0165	2		0.2775	0.0775	2		0.144	0.007	2		0.601	0.019	2			9.733		0.727	0.032	2		0.6395	0.0045	2		0.753	0.012	2		0.633	0.03	2		0.6355
9.75		0.813	0.013	2		0.561	0.135	2		0.6895	0.0105	2		0.719	0.017	2		0.281	0.082	2		0.144	0.007	2		0.601	0.018	2			9.75		0.7275	0.0305	2		0.6405	0.0055	2		0.7465	0.0125	2		0.636	0.03	2		0.6385
9.767		0.81	0.012	2		0.557	0.136	2		0.6895	0.0095	2		0.7205	0.0165	2		0.278	0.079	2		0.1425	0.0075	2		0.6	0.018	2			9.767		0.7275	0.0325	2		0.6395	0.0045	2		0.7485	0.0115	2		0.6405	0.0345	2		0.637
9.783		0.809	0.014	2		0.557	0.135	2		0.6895	0.0105	2		0.719	0.017	2		0.2785	0.0795	2		0.142	0.007	2		0.5995	0.0175	2			9.783		0.7265	0.0325	2		0.64	0.004	2		0.749	0.011	2		0.633	0.03	2		0.6395
9.8		0.8085	0.0155	2		0.557	0.136	2		0.689	0.012	2		0.72	0.017	2		0.278	0.079	2		0.142	0.008	2		0.598	0.018	2			9.8		0.7245	0.0345	2		0.6405	0.0055	2		0.7455	0.0155	2		0.6355	0.0295	2		0.635
9.817		0.8115	0.0125	2		0.5545	0.1365	2		0.6875	0.0105	2		0.721	0.016	2		0.276	0.077	2		0.141	0.008	2		0.599	0.018	2			9.817		0.7255	0.0305	2		0.638	0.004	2		0.744	0.01	2		0.6305	0.0245	2		0.6375
9.833		0.811	0.011	2		0.5515	0.1375	2		0.688	0.012	2		0.7205	0.0155	2		0.274	0.075	2		0.14	0.008	2		0.599	0.018	2			9.833		0.727	0.032	2		0.642	0.006	2		0.748	0.011	2		0.6335	0.0265	2		0.635
9.85		0.808	0.012	2		0.551	0.138	2		0.6875	0.0115	2		0.72	0.016	2		0.2735	0.0745	2		0.14	0.008	2		0.597	0.02	2			9.85		0.7245	0.0345	2		0.637	0.002	2		0.749	0.012	2		0.6335	0.0295	2		0.6375
9.867		0.809	0.01	2		0.5505	0.1385	2		0.688	0.011	2		0.719	0.016	2		0.273	0.074	2		0.14	0.009	2		0.5985	0.0195	2			9.867		0.7265	0.0325	2		0.6405	0.0045	2		0.748	0.011	2		0.6325	0.0275	2		0.637
9.883		0.8115	0.0115	2		0.553	0.137	2		0.688	0.011	2		0.7185	0.0165	2		0.274	0.077	2		0.139	0.009	2		0.597	0.019	2			9.883		0.725	0.031	2		0.6385	0.0055	2		0.7495	0.0115	2		0.633	0.029	2		0.6355
9.9		0.8085	0.0105	2		0.551	0.139	2		0.6865	0.0125	2		0.7205	0.0165	2		0.2715	0.0745	2		0.1385	0.0095	2		0.5965	0.0185	2			9.9		0.725	0.03	2		0.6375	0.0015	2		0.752	0.009	2		0.6405	0.0355	2		0.6315
9.917		0.809	0.012	2		0.552	0.138	2		0.6865	0.0125	2		0.7185	0.0165	2		0.273	0.076	2		0.1385	0.0095	2		0.5975	0.0185	2			9.917		0.727	0.03	2		0.64	0.004	2		0.7505	0.0115	2		0.6325	0.0275	2		0.6375
9.933		0.809	0.012	2		0.5505	0.1365	2		0.687	0.011	2		0.7175	0.0165	2		0.273	0.076	2		0.137	0.009	2		0.5955	0.0165	2			9.933		0.7255	0.0325	2		0.6405	0.0025	2		0.7505	0.0125	2		0.632	0.028	2		0.636
9.95		0.8095	0.0095	2		0.554	0.138	2		0.6885	0.0115	2		0.7185	0.0165	2		0.2735	0.0775	2		0.1365	0.0095	2		0.596	0.018	2			9.95		0.7245	0.0315	2		0.6395	0.0045	2		0.7505	0.0115	2		0.6355	0.0315	2		0.634
9.967		0.809	0.012	2		0.55	0.138	2		0.6865	0.0115	2		0.7175	0.0165	2		0.2715	0.0755	2		0.137	0.01	2		0.594	0.018	2			9.967		0.725	0.032	2		0.638	0.004	2		0.75	0.012	2		0.6335	0.0315	2		0.6365
9.983		0.808	0.009	2		0.551	0.139	2		0.687	0.01	2		0.7165	0.0165	2		0.2705	0.0765	2		0.136	0.01	2		0.594	0.018	2			9.983		0.7215	0.0325	2		0.637	0.004	2		0.7525	0.0125	2		0.6345	0.0305	2		0.637
10		0.807	0.01	2		0.5525	0.1385	2		0.6845	0.0095	2		0.7165	0.0165	2		0.272	0.077	2		0.1345	0.0105	2		0.593	0.019	2			10		0.724	0.032	2		0.639	0.005	2		0.752	0.01	2		0.635	0.031	2		0.6335
10.017		0.8105	0.0125	2		0.5495	0.1395	2		0.6855	0.0125	2		0.7165	0.0175	2		0.2695	0.0755	2		0.135	0.011	2		0.5945	0.0195	2			10.017		0.724	0.033	2		0.637	0.004	2		0.7515	0.0115	2		0.632	0.029	2		0.632
10.033		0.807	0.011	2		0.55	0.141	2		0.6845	0.0125	2		0.7145	0.0175	2		0.2685	0.0745	2		0.134	0.01	2		0.5945	0.0175	2			10.033		0.725	0.032	2		0.6395	0.0065	2		0.7515	0.0125	2		0.6335	0.0295	2		0.635
10.05		0.8095	0.0115	2		0.55	0.142	2		0.6845	0.0105	2		0.714	0.017	2		0.268	0.074	2		0.1335	0.0105	2		0.596	0.018	2			10.05		0.7245	0.0305	2		0.6375	0.0055	2		0.747	0.012	2		0.6325	0.0275	2		0.6325
10.067		0.808	0.013	2		0.55	0.139	2		0.685	0.012	2		0.7165	0.0165	2		0.269	0.076	2		0.133	0.011	2		0.5935	0.0185	2			10.067		0.723	0.029	2		0.638	0.002	2		0.749	0.012	2		0.634	0.031	2		0.6315
10.083		0.809	0.013	2		0.5505	0.1415	2		0.6835	0.0115	2		0.715	0.016	2		0.268	0.075	2		0.1325	0.0115	2		0.593	0.019	2			10.083		0.7245	0.0315	2		0.637	0.001	2		0.7455	0.0115	2		0.6285	0.0255	2		0.6325
10.1		0.807	0.01	2		0.546	0.142	2		0.6845	0.0105	2		0.716	0.016	2		0.265	0.072	2		0.132	0.012	2		0.5945	0.0175	2			10.1		0.722	0.031	2		0.6385	0.0045	2		0.751	0.012	2		0.6325	0.0285	2		0.635
10.117		0.8075	0.0105	2		0.5495	0.1425	2		0.683	0.012	2		0.7155	0.0165	2		0.2665	0.0745	2		0.132	0.011	2		0.5925	0.0185	2			10.117		0.723	0.031	2		0.6385	0.0055	2		0.7475	0.0115	2		0.6335	0.0315	2		0.6335
10.133		0.807	0.01	2		0.547	0.142	2		0.684	0.012	2		0.7135	0.0165	2		0.2655	0.0735	2		0.132	0.012	2		0.593	0.019	2			10.133		0.7235	0.0305	2		0.638	0.003	2		0.744	0.009	2		0.6345	0.0325	2		0.6345
10.15		0.8075	0.0125	2		0.5465	0.1405	2		0.6815	0.0095	2		0.7135	0.0175	2		0.266	0.074	2		0.131	0.012	2		0.5925	0.0175	2			10.15		0.7245	0.0345	2		0.638	0.005	2		0.7475	0.0115	2		0.6315	0.0295	2		0.631
10.167		0.8055	0.0105	2		0.5475	0.1405	2		0.6815	0.0105	2		0.7135	0.0165	2		0.2655	0.0755	2		0.13	0.012	2		0.592	0.019	2			10.167		0.7255	0.0335	2		0.6355	0.0015	2		0.7475	0.0095	2		0.6255	0.0235	2		0.6335
10.183		0.804	0.013	2		0.549	0.141	2		0.6825	0.0095	2		0.7135	0.0175	2		0.2665	0.0755	2		0.1295	0.0125	2		0.5905	0.0185	2			10.183		0.7215	0.0345	2		0.638	0.001	2		0.7465	0.0105	2		0.6325	0.0325	2		0.635
10.2		0.8085	0.0105	2		0.548	0.14	2		0.681	0.01	2		0.714	0.016	2		0.2665	0.0755	2		0.1295	0.0125	2		0.589	0.018	2			10.2		0.7235	0.0285	2		0.6365	0.0025	2		0.749	0.012	2		0.6335	0.0325	2		0.6325
10.217		0.807	0.012	2		0.548	0.14	2		0.681	0.012	2		0.7135	0.0165	2		0.2665	0.0755	2		0.129	0.013	2		0.5895	0.0175	2			10.217		0.725	0.033	2		0.637	0.006	2		0.7485	0.0115	2		0.631	0.027	2		0.6315
10.233		0.806	0.012	2		0.5455	0.1395	2		0.68	0.014	2		0.7115	0.0165	2		0.265	0.075	2		0.129	0.013	2		0.5905	0.0195	2			10.233		0.7215	0.0325	2		0.6335	0.0015	2		0.75	0.013	2		0.636	0.032	2		0.634
10.25		0.806	0.01	2		0.5465	0.1395	2		0.6795	0.0115	2		0.712	0.016	2		0.265	0.076	2		0.1285	0.0135	2		0.5905	0.0175	2			10.25		0.725	0.031	2		0.636	0.002	2		0.7495	0.0125	2		0.6305	0.0285	2		0.632
10.267		0.8065	0.0105	2		0.546	0.14	2		0.6805	0.0095	2		0.711	0.016	2		0.2645	0.0755	2		0.128	0.013	2		0.59	0.019	2			10.267		0.7235	0.0335	2		0.6365	0.0005	2		0.752	0.011	2		0.635	0.032	2		0.6315
10.283		0.8085	0.0135	2		0.548	0.138	2		0.678	0.01	2		0.7105	0.0175	2		0.267	0.077	2		0.1275	0.0135	2		0.5895	0.0195	2			10.283		0.723	0.031	2		0.6335	0.0005	2		0.7455	0.0095	2		0.6365	0.0345	2		0.6315
10.3		0.8075	0.0105	2		0.5465	0.1395	2		0.679	0.011	2		0.7115	0.0175	2		0.265	0.076	2		0.1265	0.0135	2		0.588	0.018	2			10.3		0.723	0.031	2		0.6355	0.0025	2		0.7495	0.0115	2		0.6325	0.0235	2		0.6345
10.317		0.808	0.011	2		0.5475	0.1385	2		0.679	0.012	2		0.7095	0.0175	2		0.2655	0.0775	2		0.127	0.014	2		0.5885	0.0175	2			10.317		0.723	0.031	2		0.638	0.004	2		0.7505	0.0115	2		0.6345	0.0325	2		0.631
10.333		0.808	0.011	2		0.548	0.14	2		0.6795	0.0125	2		0.7115	0.0165	2		0.2655	0.0775	2		0.126	0.014	2		0.589	0.019	2			10.333		0.7245	0.0305	2		0.638	0.005	2		0.7455	0.0115	2		0.636	0.035	2		0.6325
10.35		0.807	0.011	2		0.5455	0.1395	2		0.68	0.011	2		0.7095	0.0165	2		0.263	0.077	2		0.1245	0.0145	2		0.5885	0.0185	2			10.35		0.7235	0.0305	2		0.6375	0.0025	2		0.7475	0.0115	2		0.6275	0.0265	2		0.632
10.367		0.8045	0.0105	2		0.5495	0.1395	2		0.678	0.013	2		0.708	0.017	2		0.266	0.079	2		0.125	0.014	2		0.588	0.019	2			10.367		0.7225	0.0295	2		0.6405	0.0055	2		0.747	0.012	2		0.633	0.03	2		0.631
10.383		0.8055	0.0135	2		0.547	0.14	2		0.677	0.013	2		0.7095	0.0165	2		0.264	0.077	2		0.125	0.014	2		0.587	0.018	2			10.383		0.722	0.031	2		0.6355	0.0025	2		0.749	0.011	2		0.631	0.031	2		0.629
10.4		0.806	0.012	2		0.5485	0.1415	2		0.6785	0.0115	2		0.709	0.016	2		0.2635	0.0775	2		0.124	0.015	2		0.5865	0.0165	2			10.4		0.7235	0.0325	2		0.64	0.008	2		0.746	0.011	2		0.6345	0.0325	2		0.6315
10.417		0.807	0.013	2		0.546	0.139	2		0.6785	0.0115	2		0.71	0.018	2		0.2635	0.0775	2		0.124	0.014	2		0.5865	0.0195	2			10.417		0.723	0.033	2		0.637	0.007	2		0.747	0.012	2		0.627	0.026	2		0.63
10.433		0.8055	0.0105	2		0.5475	0.1385	2		0.6765	0.0105	2		0.708	0.017	2		0.2645	0.0785	2		0.123	0.015	2		0.5835	0.0195	2			10.433		0.7225	0.0305	2		0.6365	0.0055	2		0.75	0.01	2		0.6325	0.0325	2		0.632
10.45		0.8045	0.0125	2		0.545	0.139	2		0.677	0.012	2		0.709	0.017	2		0.263	0.077	2		0.1225	0.0145	2		0.5855	0.0185	2			10.45		0.723	0.032	2		0.633	0.003	2		0.75	0.012	2		0.632	0.03	2		0.6325
10.467		0.804	0.014	2		0.543	0.14	2		0.675	0.011	2		0.707	0.016	2		0.2615	0.0755	2		0.1225	0.0155	2		0.5855	0.0185	2			10.467		0.7215	0.0295	2		0.6335	0.0035	2		0.7485	0.0125	2		0.63	0.031	2		0.6305
10.483		0.8045	0.0135	2		0.5465	0.1395	2		0.676	0.012	2		0.711	0.016	2		0.263	0.078	2		0.122	0.015	2		0.5855	0.0195	2			10.483		0.7205	0.0285	2		0.633	0.003	2		0.7475	0.0115	2		0.632	0.03	2		0.6305
10.5		0.8055	0.0135	2		0.544	0.14	2		0.6755	0.0105	2		0.7065	0.0185	2		0.2615	0.0765	2		0.1215	0.0155	2		0.584	0.018	2			10.5		0.722	0.031	2		0.637	0.006	2		0.7465	0.0115	2		0.6275	0.0275	2		0.631
10.517		0.8035	0.0125	2		0.546	0.139	2		0.6765	0.0115	2		0.707	0.017	2		0.263	0.078	2		0.1215	0.0155	2		0.5825	0.0195	2			10.517		0.7215	0.0325	2		0.637	0.004	2		0.7485	0.0115	2		0.634	0.034	2		0.6315
10.533		0.804	0.016	2		0.546	0.139	2		0.676	0.01	2		0.706	0.016	2		0.2625	0.0785	2		0.121	0.015	2		0.5835	0.0195	2			10.533		0.7225	0.0315	2		0.638	0.005	2		0.7505	0.0115	2		0.6345	0.0345	2		0.632
10.55		0.805	0.013	2		0.5455	0.1405	2		0.673	0.012	2		0.7065	0.0165	2		0.261	0.078	2		0.1205	0.0155	2		0.582	0.019	2			10.55		0.7235	0.0295	2		0.6335	0.0005	2		0.7475	0.0075	2		0.6325	0.0325	2		0.6295
10.567		0.8045	0.0125	2		0.5455	0.1395	2		0.6725	0.0105	2		0.705	0.016	2		0.2615	0.0785	2		0.12	0.015	2		0.582	0.019	2			10.567		0.722	0.033	2		0.636	0.007	2		0.746	0.014	2		0.6315	0.0305	2		0.6285
10.583		0.804	0.012	2		0.5455	0.1395	2		0.6735	0.0125	2		0.7055	0.0165	2		0.262	0.078	2		0.1205	0.0155	2		0.5825	0.0195	2			10.583		0.721	0.033	2		0.635	0.005	2		0.749	0.012	2		0.632	0.033	2		0.63
10.6		0.8045	0.0115	2		0.543	0.14	2		0.6745	0.0105	2		0.707	0.016	2		0.2595	0.0765	2		0.1195	0.0155	2		0.5805	0.0185	2			10.6		0.7215	0.0345	2		0.636	0.005	2		0.746	0.013	2		0.6315	0.0335	2		0.629
10.617		0.802	0.013	2		0.5425	0.1385	2		0.6755	0.0105	2		0.703	0.017	2		0.2605	0.0775	2		0.119	0.016	2		0.58	0.019	2			10.617		0.723	0.032	2		0.638	0.005	2		0.747	0.01	2		0.6345	0.0365	2		0.6315
10.633		0.8035	0.0105	2		0.542	0.139	2		0.674	0.011	2		0.7055	0.0165	2		0.2595	0.0775	2		0.119	0.016	2		0.5825	0.0205	2			10.633		0.7205	0.0315	2		0.6355	0.0065	2		0.7475	0.0105	2		0.6325	0.0315	2		0.631
10.65		0.804	0.01	2		0.543	0.14	2		0.6735	0.0095	2		0.706	0.016	2		0.2595	0.0775	2		0.118	0.017	2		0.5825	0.0185	2			10.65		0.7235	0.0335	2		0.6345	0.0025	2		0.75	0.01	2		0.6255	0.0265	2		0.6295
10.667		0.804	0.011	2		0.5435	0.1375	2		0.6715	0.0105	2		0.705	0.017	2		0.2605	0.0795	2		0.117	0.016	2		0.5825	0.0195	2			10.667		0.723	0.032	2		0.637	0.005	2		0.7505	0.0105	2		0.635	0.036	2		0.63
10.683		0.8065	0.0105	2		0.5435	0.1385	2		0.6725	0.0095	2		0.7055	0.0165	2		0.26	0.079	2		0.1175	0.0165	2		0.581	0.018	2			10.683		0.7225	0.0315	2		0.6345	0.0045	2		0.75	0.013	2		0.636	0.037	2		0.6295
10.7		0.805	0.013	2		0.5435	0.1405	2		0.671	0.011	2		0.7025	0.0175	2		0.2585	0.0785	2		0.1175	0.0165	2		0.582	0.019	2			10.7		0.7205	0.0325	2		0.633	0.002	2		0.748	0.012	2		0.628	0.028	2		0.629
10.717		0.804	0.012	2		0.5435	0.1395	2		0.672	0.01	2		0.704	0.017	2		0.259	0.079	2		0.1165	0.0165	2		0.5795	0.0195	2			10.717		0.7175	0.0325	2		0.633	0.004	2		0.7485	0.0115	2		0.626	0.026	2		0.627
10.733		0.805	0.013	2		0.543	0.14	2		0.672	0.009	2		0.7025	0.0165	2		0.2585	0.0785	2		0.1165	0.0175	2		0.5795	0.0175	2			10.733		0.7175	0.0345	2		0.634	0.005	2		0.743	0.012	2		0.6305	0.0325	2		0.6305
10.75		0.8025	0.0125	2		0.542	0.141	2		0.671	0.011	2		0.7025	0.0165	2		0.257	0.078	2		0.1155	0.0175	2		0.5785	0.0175	2			10.75		0.721	0.031	2		0.6335	0.0075	2		0.745	0.012	2		0.631	0.034	2		0.6295
10.767		0.8025	0.0135	2		0.5415	0.1405	2		0.671	0.01	2		0.703	0.017	2		0.257	0.078	2		0.115	0.017	2		0.578	0.018	2			10.767		0.718	0.03	2		0.632	0.004	2		0.7455	0.0125	2		0.6355	0.0375	2		0.628
10.783		0.804	0.012	2		0.54	0.142	2		0.6695	0.0115	2		0.7025	0.0165	2		0.255	0.076	2		0.115	0.017	2		0.5785	0.0185	2			10.783		0.7165	0.0305	2		0.634	0.009	2		0.744	0.011	2		0.6285	0.0315	2		0.628
10.8		0.803	0.013	2		0.542	0.138	2		0.6685	0.0105	2		0.702	0.016	2		0.2585	0.0795	2		0.115	0.017	2		0.578	0.02	2			10.8		0.717	0.032	2		0.636	0.006	2		0.746	0.012	2		0.63	0.032	2		0.6285
10.817		0.8025	0.0125	2		0.54	0.137	2		0.6695	0.0105	2		0.703	0.016	2		0.258	0.078	2		0.115	0.017	2		0.5755	0.0195	2			10.817		0.7185	0.0325	2		0.633	0.004	2		0.7505	0.0115	2		0.63	0.032	2		0.628
10.833		0.8025	0.0125	2		0.5375	0.1385	2		0.667	0.01	2		0.703	0.016	2		0.256	0.077	2		0.1145	0.0175	2		0.576	0.02	2			10.833		0.719	0.032	2		0.6355	0.0035	2		0.7445	0.0125	2		0.628	0.031	2		0.63
10.85		0.803	0.012	2		0.537	0.138	2		0.6685	0.0105	2		0.7015	0.0165	2		0.2555	0.0775	2		0.1145	0.0175	2		0.577	0.02	2			10.85		0.719	0.034	2		0.637	0.002	2		0.745	0.012	2		0.628	0.031	2		0.631
10.867		0.8015	0.0125	2		0.5375	0.1385	2		0.6675	0.0105	2		0.702	0.017	2		0.255	0.077	2		0.1135	0.0175	2		0.5745	0.0195	2			10.867		0.718	0.033	2		0.634	0.003	2		0.746	0.012	2		0.6315	0.0345	2		0.629
10.883		0.802	0.01	2		0.5385	0.1375	2		0.668	0.01	2		0.702	0.016	2		0.2565	0.0785	2		0.1135	0.0175	2		0.5765	0.0205	2			10.883		0.7205	0.0335	2		0.632	0	2		0.747	0.012	2		0.63	0.033	2		0.627
10.9		0.8025	0.0125	2		0.5375	0.1385	2		0.6675	0.0115	2		0.701	0.017	2		0.2545	0.0775	2		0.113	0.018	2		0.575	0.02	2			10.9		0.721	0.033	2		0.6355	0.0065	2		0.7475	0.0125	2		0.6305	0.0335	2		0.6275
10.917		0.802	0.013	2		0.537	0.139	2		0.668	0.009	2		0.7	0.017	2		0.254	0.077	2		0.113	0.018	2		0.575	0.02	2			10.917		0.723	0.035	2		0.634	0.006	2		0.7495	0.0115	2		0.627	0.03	2		0.628
10.933		0.8015	0.0115	2		0.5365	0.1385	2		0.6665	0.0115	2		0.7005	0.0175	2		0.253	0.078	2		0.113	0.018	2		0.5755	0.0195	2			10.933		0.724	0.034	2		0.637	0.004	2		0.747	0.011	2		0.6315	0.0345	2		0.629
10.95		0.8	0.013	2		0.537	0.139	2		0.6675	0.0105	2		0.6995	0.0165	2		0.254	0.077	2		0.1125	0.0185	2		0.575	0.021	2			10.95		0.7185	0.0345	2		0.6365	0.0035	2		0.746	0.012	2		0.6265	0.0295	2		0.6295
10.967		0.8015	0.0115	2		0.5365	0.1395	2		0.666	0.011	2		0.7	0.017	2		0.2525	0.0775	2		0.112	0.018	2		0.5745	0.0175	2			10.967		0.7195	0.0325	2		0.6315	0.0005	2		0.748	0.011	2		0.6255	0.0305	2		0.626
10.983		0.801	0.012	2		0.534	0.14	2		0.667	0.01	2		0.7005	0.0165	2		0.251	0.075	2		0.1115	0.0185	2		0.574	0.019	2			10.983		0.721	0.031	2		0.633	0.006	2		0.749	0.011	2		0.6325	0.0365	2		0.6265
11		0.802	0.013	2		0.5315	0.1405	2		0.6665	0.0085	2		0.699	0.017	2		0.2495	0.0745	2		0.1115	0.0185	2		0.574	0.017	2			11		0.719	0.034	2		0.631	0.004	2		0.7435	0.0115	2		0.6315	0.0355	2		0.627
11.017		0.803	0.012	2		0.5315	0.1415	2		0.665	0.007	2		0.6985	0.0165	2		0.249	0.074	2		0.111	0.018	2		0.575	0.018	2			11.017		0.7165	0.0315	2		0.6335	0.0055	2		0.7445	0.0105	2		0.6285	0.0325	2		0.627
11.033		0.8025	0.0125	2		0.532	0.142	2		0.6655	0.0095	2		0.6985	0.0165	2		0.249	0.073	2		0.1105	0.0185	2		0.575	0.018	2			11.033		0.7165	0.0345	2		0.635	0.004	2		0.7465	0.0105	2		0.6295	0.0345	2		0.626
11.05		0.8005	0.0115	2		0.5315	0.1415	2		0.6665	0.0095	2		0.6985	0.0165	2		0.248	0.074	2		0.11	0.018	2		0.5725	0.0175	2			11.05		0.719	0.032	2		0.6335	0.0055	2		0.747	0.013	2		0.629	0.033	2		0.6255
11.067		0.8005	0.0135	2		0.5315	0.1405	2		0.665	0.01	2		0.698	0.017	2		0.2485	0.0745	2		0.1095	0.0185	2		0.572	0.017	2			11.067		0.717	0.03	2		0.6345	0.0055	2		0.746	0.011	2		0.629	0.033	2		0.6285
11.083		0.802	0.012	2		0.5315	0.1425	2		0.665	0.011	2		0.696	0.017	2		0.2475	0.0735	2		0.11	0.019	2		0.5725	0.0175	2			11.083		0.7195	0.0365	2		0.632	0.004	2		0.7435	0.0145	2		0.6295	0.0345	2		0.6255
11.1		0.8015	0.0125	2		0.534	0.138	2		0.666	0.01	2		0.697	0.017	2		0.251	0.077	2		0.109	0.019	2		0.5725	0.0175	2			11.1		0.7175	0.0335	2		0.634	0.004	2		0.744	0.015	2		0.6275	0.0315	2		0.626
11.117		0.801	0.012	2		0.5325	0.1415	2		0.663	0.01	2		0.697	0.016	2		0.2485	0.0745	2		0.1085	0.0185	2		0.573	0.019	2			11.117		0.72	0.034	2		0.6325	0.0065	2		0.7435	0.0135	2		0.633	0.036	2		0.626
11.133		0.8	0.012	2		0.5275	0.1405	2		0.664	0.01	2		0.698	0.016	2		0.2465	0.0725	2		0.109	0.019	2		0.57	0.021	2			11.133		0.722	0.033	2		0.6315	0.0055	2		0.7465	0.0115	2		0.627	0.029	2		0.6275
11.15		0.801	0.012	2		0.531	0.139	2		0.664	0.01	2		0.6975	0.0165	2		0.2495	0.0755	2		0.109	0.019	2		0.571	0.019	2			11.15		0.7195	0.0345	2		0.631	0.006	2		0.746	0.011	2		0.6275	0.0335	2		0.626
11.167		0.8	0.012	2		0.5295	0.1415	2		0.663	0.01	2		0.6965	0.0155	2		0.247	0.073	2		0.1085	0.0195	2		0.5705	0.0185	2			11.167		0.7195	0.0325	2		0.6335	0.0035	2		0.749	0.011	2		0.628	0.034	2		0.629
11.183		0.7985	0.0125	2		0.529	0.141	2		0.663	0.012	2		0.6945	0.0165	2		0.2465	0.0735	2		0.108	0.019	2		0.57	0.02	2			11.183		0.718	0.035	2		0.6325	0.0065	2		0.7475	0.0115	2		0.628	0.032	2		0.6295
11.2		0.7975	0.0145	2		0.528	0.142	2		0.663	0.009	2		0.697	0.017	2		0.2455	0.0715	2		0.1075	0.0185	2		0.57	0.019	2			11.2		0.7195	0.0335	2		0.632	0	2		0.7455	0.0115	2		0.6305	0.0365	2		0.6265
11.217		0.797	0.013	2		0.527	0.142	2		0.663	0.009	2		0.696	0.017	2		0.245	0.072	2		0.1075	0.0195	2		0.569	0.022	2			11.217		0.72	0.036	2		0.635	0.006	2		0.747	0.011	2		0.6275	0.0315	2		0.622
11.233		0.7965	0.0145	2		0.5295	0.1415	2		0.66	0.011	2		0.696	0.016	2		0.246	0.074	2		0.1075	0.0195	2		0.5715	0.0195	2			11.233		0.7225	0.0345	2		0.6325	0.0035	2		0.745	0.012	2		0.6275	0.0315	2		0.625
11.25		0.8	0.016	2		0.5255	0.1425	2		0.6635	0.0085	2		0.6945	0.0165	2		0.243	0.072	2		0.1065	0.0195	2		0.5675	0.0195	2			11.25		0.72	0.033	2		0.6345	0.0055	2		0.746	0.012	2		0.6275	0.0335	2		0.623
11.267		0.798	0.014	2		0.5265	0.1415	2		0.662	0.008	2		0.6975	0.0165	2		0.244	0.073	2		0.1065	0.0185	2		0.567	0.02	2			11.267		0.7185	0.0335	2		0.6315	0.0035	2		0.7475	0.0115	2		0.625	0.032	2		0.625
11.283		0.799	0.013	2		0.527	0.141	2		0.6605	0.0085	2		0.6945	0.0165	2		0.2445	0.0725	2		0.106	0.02	2		0.568	0.021	2			11.283		0.717	0.035	2		0.6345	0.0025	2		0.7485	0.0115	2		0.63	0.036	2		0.625
11.3		0.798	0.012	2		0.5295	0.1405	2		0.6615	0.0085	2		0.6935	0.0165	2		0.246	0.075	2		0.105	0.019	2		0.567	0.019	2			11.3		0.716	0.035	2		0.631	0.005	2		0.7505	0.0115	2		0.6295	0.0385	2		0.623
11.317		0.7985	0.0125	2		0.528	0.14	2		0.6615	0.0095	2		0.689	0.018	2		0.245	0.075	2		0.106	0.019	2		0.5675	0.0185	2			11.317		0.72	0.035	2		0.6305	0.0045	2		0.7505	0.0115	2		0.627	0.035	2		0.624
11.333		0.799	0.012	2		0.528	0.139	2		0.6595	0.0075	2		0.6945	0.0185	2		0.2455	0.0755	2		0.1055	0.0195	2		0.5685	0.0195	2			11.333		0.719	0.034	2		0.6295	0.0055	2		0.7465	0.0115	2		0.6275	0.0325	2		0.625
11.35		0.799	0.012	2		0.5285	0.1395	2		0.66	0.01	2		0.693	0.018	2		0.247	0.075	2		0.1055	0.0195	2		0.5675	0.0195	2			11.35		0.715	0.032	2		0.633	0.004	2		0.7485	0.0115	2		0.624	0.029	2		0.6265
11.367		0.798	0.014	2		0.5275	0.1395	2		0.6605	0.0095	2		0.693	0.017	2		0.245	0.075	2		0.105	0.02	2		0.567	0.019	2			11.367		0.718	0.032	2		0.6285	0.0045	2		0.7475	0.0115	2		0.6265	0.0325	2		0.624
11.383		0.797	0.012	2		0.5275	0.1405	2		0.66	0.011	2		0.694	0.017	2		0.2445	0.0745	2		0.1045	0.0195	2		0.565	0.018	2			11.383		0.7175	0.0325	2		0.632	0.007	2		0.7455	0.0115	2		0.6285	0.0355	2		0.627
11.4		0.8	0.014	2		0.526	0.141	2		0.6575	0.0115	2		0.692	0.018	2		0.2425	0.0735	2		0.1045	0.0205	2		0.5645	0.0175	2			11.4		0.716	0.034	2		0.63	0.004	2		0.7465	0.0115	2		0.622	0.03	2		0.624
11.417		0.798	0.012	2		0.526	0.141	2		0.6585	0.0105	2		0.6925	0.0165	2		0.2435	0.0735	2		0.1045	0.0205	2		0.565	0.02	2			11.417		0.717	0.032	2		0.633	0.006	2		0.745	0.012	2		0.624	0.031	2		0.623
11.433		0.7965	0.0125	2		0.526	0.141	2		0.6575	0.0115	2		0.692	0.017	2		0.2435	0.0735	2		0.104	0.02	2		0.5665	0.0185	2			11.433		0.718	0.033	2		0.63	0.004	2		0.7415	0.0115	2		0.6275	0.0345	2		0.6235
11.45		0.7975	0.0135	2		0.524	0.141	2		0.6575	0.0105	2		0.6925	0.0175	2		0.242	0.072	2		0.104	0.02	2		0.564	0.018	2			11.45		0.716	0.034	2		0.6335	0.0065	2		0.7405	0.0115	2		0.626	0.032	2		0.6235
11.467		0.796	0.013	2		0.5235	0.1415	2		0.657	0.01	2		0.6915	0.0175	2		0.2415	0.0715	2		0.103	0.02	2		0.564	0.021	2			11.467		0.7135	0.0315	2		0.6315	0.0015	2		0.7435	0.0115	2		0.63	0.039	2		0.6245
11.483		0.7975	0.0125	2		0.522	0.141	2		0.656	0.009	2		0.691	0.018	2		0.241	0.072	2		0.1035	0.0205	2		0.563	0.018	2			11.483		0.7155	0.0345	2		0.63	0.005	2		0.7445	0.0115	2		0.624	0.031	2		0.623
11.5		0.7965	0.0125	2		0.5245	0.1405	2		0.657	0.009	2		0.6915	0.0185	2		0.242	0.073	2		0.103	0.02	2		0.5625	0.0185	2			11.5		0.7145	0.0335	2		0.629	0.004	2		0.745	0.012	2		0.6255	0.0325	2		0.627
11.517		0.797	0.012	2		0.522	0.14	2		0.6585	0.0085	2		0.6925	0.0175	2		0.2405	0.0725	2		0.1025	0.0205	2		0.562	0.019	2			11.517		0.7155	0.0345	2		0.6315	0.0055	2		0.746	0.011	2		0.623	0.032	2		0.622
11.533		0.795	0.014	2		0.5215	0.1405	2		0.6555	0.0105	2		0.6915	0.0175	2		0.24	0.072	2		0.102	0.02	2		0.5635	0.0215	2			11.533		0.715	0.033	2		0.632	0.005	2		0.7475	0.0115	2		0.6265	0.0335	2		0.6215
11.55		0.795	0.015	2		0.5235	0.1405	2		0.6555	0.0085	2		0.6895	0.0185	2		0.2405	0.0735	2		0.1025	0.0205	2		0.5605	0.0195	2			11.55		0.7145	0.0345	2		0.628	0.002	2		0.7435	0.0115	2		0.624	0.03	2		0.622
11.567		0.795	0.013	2		0.52	0.142	2		0.655	0.009	2		0.69	0.018	2		0.2375	0.0705	2		0.1025	0.0205	2		0.561	0.021	2			11.567		0.716	0.035	2		0.629	0.007	2		0.746	0.011	2		0.6285	0.0345	2		0.619
11.583		0.798	0.012	2		0.5195	0.1415	2		0.656	0.008	2		0.689	0.018	2		0.2375	0.0715	2		0.1015	0.0205	2		0.562	0.021	2			11.583		0.7135	0.0325	2		0.631	0.006	2		0.7445	0.0135	2		0.624	0.032	2		0.6235
11.6		0.796	0.013	2		0.5175	0.1425	2		0.656	0.009	2		0.689	0.017	2		0.236	0.07	2		0.1015	0.0205	2		0.5615	0.0205	2			11.6		0.716	0.033	2		0.632	0.007	2		0.7405	0.0115	2		0.6285	0.0365	2		0.6235
11.617		0.7955	0.0125	2		0.5195	0.1425	2		0.6535	0.0095	2		0.688	0.017	2		0.2375	0.0705	2		0.1015	0.0205	2		0.5615	0.0185	2			11.617		0.7165	0.0335	2		0.6315	0.0045	2		0.7395	0.0125	2		0.627	0.037	2		0.6195
11.633		0.795	0.013	2		0.518	0.142	2		0.653	0.011	2		0.691	0.017	2		0.2365	0.0705	2		0.1005	0.0205	2		0.5625	0.0195	2			11.633		0.7165	0.0345	2		0.6295	0.0055	2		0.7415	0.0135	2		0.622	0.032	2		0.62
11.65		0.795	0.013	2		0.5185	0.1415	2		0.655	0.009	2		0.6885	0.0175	2		0.2375	0.0705	2		0.1005	0.0205	2		0.562	0.02	2			11.65		0.717	0.033	2		0.6295	0.0055	2		0.744	0.012	2		0.6275	0.0365	2		0.6205
11.667		0.7955	0.0125	2		0.52	0.139	2		0.6535	0.0105	2		0.689	0.018	2		0.2385	0.0735	2		0.1005	0.0205	2		0.5605	0.0195	2			11.667		0.716	0.032	2		0.632	0.006	2		0.7415	0.0115	2		0.6255	0.0335	2		0.6195
11.683		0.7965	0.0145	2		0.5175	0.1405	2		0.653	0.01	2		0.69	0.017	2		0.2365	0.0715	2		0.1	0.021	2		0.5615	0.0195	2			11.683		0.717	0.035	2		0.6285	0.0025	2		0.7465	0.0115	2		0.6295	0.0375	2		0.6215
11.7		0.795	0.013	2		0.5195	0.1395	2		0.652	0.01	2		0.687	0.018	2		0.238	0.073	2		0.1005	0.0205	2		0.559	0.019	2			11.7		0.714	0.033	2		0.6295	0.0025	2		0.7375	0.0115	2		0.6215	0.0315	2		0.6205
11.717		0.7955	0.0135	2		0.518	0.141	2		0.6515	0.0095	2		0.688	0.018	2		0.236	0.071	2		0.1005	0.0205	2		0.5595	0.0195	2			11.717		0.7145	0.0315	2		0.628	0.004	2		0.739	0.012	2		0.621	0.031	2		0.6185
11.733		0.7965	0.0135	2		0.52	0.14	2		0.651	0.01	2		0.6845	0.0185	2		0.238	0.073	2		0.1	0.021	2		0.558	0.019	2			11.733		0.7145	0.0315	2		0.63	0.004	2		0.74	0.012	2		0.6265	0.0355	2		0.6185
11.75		0.795	0.014	2		0.522	0.141	2		0.6545	0.0085	2		0.684	0.018	2		0.2385	0.0735	2		0.0995	0.0205	2		0.5585	0.0195	2			11.75		0.7175	0.0355	2		0.6285	0.0045	2		0.741	0.012	2		0.6255	0.0345	2		0.6205
11.767		0.7965	0.0135	2		0.5225	0.1395	2		0.653	0.009	2		0.686	0.017	2		0.239	0.075	2		0.099	0.021	2		0.558	0.019	2			11.767		0.7155	0.0335	2		0.6295	0.0055	2		0.7445	0.0115	2		0.623	0.033	2		0.618
11.783		0.797	0.013	2		0.521	0.14	2		0.6525	0.0095	2		0.685	0.018	2		0.238	0.074	2		0.0995	0.0215	2		0.5565	0.0195	2			11.783		0.714	0.032	2		0.627	0.004	2		0.7495	0.0115	2		0.6255	0.0345	2		0.6205
11.8		0.7955	0.0135	2		0.5185	0.1405	2		0.6515	0.0105	2		0.685	0.018	2		0.237	0.072	2		0.0985	0.0205	2		0.558	0.019	2			11.8		0.712	0.033	2		0.6285	0.0005	2		0.7415	0.0125	2		0.6245	0.0355	2		0.618
11.817		0.7935	0.0135	2		0.5185	0.1415	2		0.6525	0.0115	2		0.6855	0.0175	2		0.236	0.072	2		0.099	0.021	2		0.5575	0.0215	2			11.817		0.714	0.035	2		0.63	0.005	2		0.7415	0.0115	2		0.629	0.039	2		0.6205
11.833		0.7925	0.0135	2		0.519	0.141	2		0.651	0.009	2		0.6855	0.0175	2		0.2365	0.0725	2		0.0985	0.0205	2		0.5565	0.0205	2			11.833		0.7165	0.0335	2		0.629	0.005	2		0.7445	0.0125	2		0.622	0.032	2		0.6175
11.85		0.7955	0.0125	2		0.5175	0.1395	2		0.65	0.009	2		0.685	0.017	2		0.236	0.073	2		0.098	0.021	2		0.556	0.02	2			11.85		0.716	0.033	2		0.628	0.004	2		0.7445	0.0115	2		0.629	0.039	2		0.6165
11.867		0.7925	0.0135	2		0.517	0.141	2		0.6505	0.0095	2		0.6845	0.0175	2		0.235	0.072	2		0.098	0.021	2		0.5555	0.0185	2			11.867		0.7165	0.0355	2		0.626	0.006	2		0.746	0.012	2		0.6205	0.0295	2		0.6175
11.883		0.794	0.013	2		0.519	0.139	2		0.6475	0.0075	2		0.684	0.018	2		0.237	0.074	2		0.098	0.021	2		0.556	0.022	2			11.883		0.7155	0.0345	2		0.6305	0.0045	2		0.743	0.012	2		0.6225	0.0315	2		0.618
11.9		0.7955	0.0125	2		0.5185	0.1405	2		0.65	0.009	2		0.6855	0.0175	2		0.236	0.073	2		0.098	0.021	2		0.555	0.02	2			11.9		0.7145	0.0395	2		0.627	0.002	2		0.747	0.011	2		0.625	0.036	2		0.619
11.917		0.7895	0.0145	2		0.5185	0.1385	2		0.6485	0.0085	2		0.683	0.018	2		0.2365	0.0745	2		0.097	0.021	2		0.5555	0.0195	2			11.917		0.714	0.036	2		0.63	0.004	2		0.746	0.013	2		0.628	0.038	2		0.617
11.933		0.7915	0.0145	2		0.518	0.141	2		0.6465	0.0085	2		0.6825	0.0175	2		0.235	0.073	2		0.0975	0.0205	2		0.5555	0.0205	2			11.933		0.7125	0.0335	2		0.6305	0.0045	2		0.7465	0.0125	2		0.6235	0.0365	2		0.6135
11.95		0.791	0.015	2		0.5175	0.1405	2		0.648	0.008	2		0.6825	0.0175	2		0.235	0.073	2		0.097	0.021	2		0.5535	0.0195	2			11.95		0.71	0.036	2		0.627	0.003	2		0.747	0.012	2		0.626	0.036	2		0.615
11.967		0.793	0.015	2		0.5185	0.1385	2		0.6485	0.0085	2		0.683	0.017	2		0.236	0.075	2		0.097	0.021	2		0.555	0.021	2			11.967		0.716	0.034	2		0.628	0.004	2		0.7475	0.0115	2		0.621	0.032	2		0.6155
11.983		0.794	0.014	2		0.5195	0.1395	2		0.647	0.008	2		0.6835	0.0165	2		0.237	0.075	2		0.097	0.021	2		0.5545	0.0215	2			11.983		0.7095	0.0315	2		0.6245	0.0015	2		0.7475	0.0115	2		0.625	0.035	2		0.614
12		0.794	0.014	2		0.516	0.139	2		0.648	0.01	2		0.682	0.018	2		0.234	0.073	2		0.097	0.021	2		0.554	0.021	2			12		0.715	0.035	2		0.6285	0.0045	2		0.746	0.012	2		0.6235	0.0355	2		0.6155
12.017		0.7935	0.0135	2		0.5155	0.1405	2		0.647	0.01	2		0.6805	0.0175	2		0.2325	0.0725	2		0.0965	0.0215	2		0.552	0.018	2			12.017		0.7135	0.0325	2		0.629	0.005	2		0.744	0.012	2		0.623	0.035	2		0.617
12.033		0.7935	0.0125	2		0.5175	0.1385	2		0.648	0.009	2		0.682	0.017	2		0.235	0.075	2		0.0965	0.0215	2		0.5535	0.0185	2			12.033		0.7115	0.0345	2		0.628	0.004	2		0.7445	0.0115	2		0.6225	0.0345	2		0.6145
12.05		0.793	0.014	2		0.515	0.14	2		0.6445	0.0105	2		0.683	0.018	2		0.2325	0.0725	2		0.096	0.021	2		0.553	0.02	2			12.05		0.7145	0.0325	2		0.6295	0.0065	2		0.7465	0.0115	2		0.6245	0.0355	2		0.6155
12.067		0.794	0.014	2		0.516	0.138	2		0.646	0.007	2		0.682	0.018	2		0.234	0.075	2		0.0965	0.0215	2		0.5525	0.0185	2			12.067		0.712	0.034	2		0.63	0.004	2		0.7425	0.0115	2		0.6215	0.0335	2		0.616
12.083		0.791	0.018	2		0.516	0.14	2		0.646	0.007	2		0.6805	0.0185	2		0.2325	0.0735	2		0.0955	0.0215	2		0.5515	0.0175	2			12.083		0.7135	0.0325	2		0.625	0.002	2		0.7425	0.0115	2		0.6205	0.0335	2		0.613
12.1		0.7935	0.0145	2		0.5135	0.1405	2		0.646	0.009	2		0.68	0.018	2		0.2315	0.0715	2		0.095	0.021	2		0.5525	0.0195	2			12.1		0.7155	0.0295	2		0.628	0.004	2		0.7425	0.0115	2		0.623	0.034	2		0.6145
12.117		0.789	0.016	2		0.5145	0.1385	2		0.646	0.009	2		0.6815	0.0175	2		0.2325	0.0735	2		0.095	0.021	2		0.552	0.02	2			12.117		0.7195	0.0295	2		0.629	0.005	2		0.7445	0.0115	2		0.6205	0.0335	2		0.6135
12.133		0.7925	0.0145	2		0.514	0.139	2		0.645	0.01	2		0.6815	0.0175	2		0.232	0.073	2		0.0955	0.0215	2		0.552	0.019	2			12.133		0.715	0.034	2		0.63	0.002	2		0.743	0.011	2		0.618	0.03	2		0.612
12.15		0.79	0.015	2		0.5145	0.1395	2		0.6455	0.0085	2		0.6795	0.0185	2		0.232	0.073	2		0.095	0.022	2		0.551	0.02	2			12.15		0.715	0.034	2		0.6305	0.0045	2		0.7445	0.0115	2		0.619	0.032	2		0.613
12.167		0.791	0.015	2		0.5135	0.1395	2		0.645	0.01	2		0.6805	0.0175	2		0.2315	0.0735	2		0.0945	0.0215	2		0.55	0.021	2			12.167		0.716	0.033	2		0.6275	0.0045	2		0.7455	0.0115	2		0.623	0.036	2		0.6105
12.183		0.791	0.013	2		0.515	0.138	2		0.644	0.011	2		0.678	0.017	2		0.233	0.074	2		0.095	0.021	2		0.551	0.02	2			12.183		0.713	0.036	2		0.626	0.008	2		0.7455	0.0115	2		0.622	0.034	2		0.6115
12.2		0.7905	0.0145	2		0.5125	0.1385	2		0.6435	0.0105	2		0.6785	0.0185	2		0.2315	0.0735	2		0.094	0.021	2		0.5495	0.0195	2			12.2		0.7105	0.0345	2		0.6265	0.0075	2		0.7445	0.0105	2		0.6215	0.0335	2		0.612
12.217		0.79	0.015	2		0.513	0.139	2		0.6435	0.0085	2		0.6785	0.0175	2		0.2315	0.0735	2		0.094	0.021	2		0.5495	0.0205	2			12.217		0.712	0.036	2		0.627	0.006	2		0.7465	0.0115	2		0.625	0.037	2		0.6125
12.233		0.791	0.016	2		0.515	0.14	2		0.642	0.009	2		0.678	0.017	2		0.232	0.074	2		0.0945	0.0215	2		0.549	0.019	2			12.233		0.7115	0.0375	2		0.631	0.005	2		0.7435	0.0115	2		0.619	0.031	2		0.613
12.25		0.79	0.013	2		0.5135	0.1385	2		0.6445	0.0105	2		0.6805	0.0175	2		0.232	0.074	2		0.094	0.022	2		0.55	0.02	2			12.25		0.709	0.037	2		0.628	0.006	2		0.7445	0.0125	2		0.625	0.038	2		0.61
12.267		0.7925	0.0145	2		0.514	0.139	2		0.642	0.009	2		0.6785	0.0175	2		0.2315	0.0745	2		0.0935	0.0215	2		0.5495	0.0205	2			12.267		0.7125	0.0335	2		0.627	0.004	2		0.742	0.014	2		0.623	0.035	2		0.613
12.283		0.792	0.016	2		0.515	0.139	2		0.6415	0.0105	2		0.6785	0.0165	2		0.2325	0.0745	2		0.0935	0.0215	2		0.5495	0.0195	2			12.283		0.711	0.036	2		0.63	0.008	2		0.742	0.013	2		0.6265	0.0395	2		0.613
12.3		0.7915	0.0155	2		0.514	0.139	2		0.6395	0.0095	2		0.6775	0.0175	2		0.2315	0.0735	2		0.0935	0.0215	2		0.5475	0.0175	2			12.3		0.711	0.032	2		0.6285	0.0075	2		0.7445	0.0135	2		0.623	0.037	2		0.6105
12.317		0.791	0.016	2		0.5145	0.1385	2		0.641	0.008	2		0.6765	0.0165	2		0.2325	0.0745	2		0.0935	0.0215	2		0.547	0.021	2			12.317		0.7105	0.0345	2		0.63	0.003	2		0.7405	0.0125	2		0.623	0.035	2		0.6105
12.333		0.789	0.015	2		0.513	0.14	2		0.641	0.009	2		0.6775	0.0175	2		0.2305	0.0735	2		0.0925	0.0215	2		0.5485	0.0195	2			12.333		0.712	0.034	2		0.626	0.007	2		0.7485	0.0115	2		0.618	0.032	2		0.6125
12.35		0.7895	0.0155	2		0.512	0.14	2		0.6415	0.0115	2		0.6775	0.0175	2		0.229	0.073	2		0.0925	0.0215	2		0.548	0.02	2			12.35		0.712	0.035	2		0.6285	0.0045	2		0.7435	0.0125	2		0.621	0.036	2		0.6115
12.367		0.7895	0.0155	2		0.512	0.138	2		0.642	0.01	2		0.679	0.018	2		0.2305	0.0745	2		0.0925	0.0215	2		0.547	0.019	2			12.367		0.712	0.033	2		0.625	0.004	2		0.7445	0.0125	2		0.6225	0.0355	2		0.614
12.383		0.79	0.015	2		0.514	0.139	2		0.6415	0.0105	2		0.677	0.017	2		0.2305	0.0745	2		0.0925	0.0215	2		0.548	0.02	2			12.383		0.709	0.033	2		0.627	0.008	2		0.7455	0.0115	2		0.6195	0.0335	2		0.613
12.4		0.79	0.015	2		0.514	0.14	2		0.639	0.009	2		0.6745	0.0175	2		0.23	0.074	2		0.092	0.021	2		0.547	0.021	2			12.4		0.7085	0.0345	2		0.626	0.005	2		0.7455	0.0125	2		0.6235	0.0385	2		0.609
12.417		0.7905	0.0145	2		0.512	0.139	2		0.6395	0.0095	2		0.6755	0.0175	2		0.23	0.074	2		0.0915	0.0215	2		0.5455	0.0195	2			12.417		0.713	0.035	2		0.631	0.004	2		0.7465	0.0125	2		0.617	0.032	2		0.613
12.433		0.791	0.016	2		0.5125	0.1405	2		0.638	0.011	2		0.6755	0.0185	2		0.2285	0.0735	2		0.0915	0.0215	2		0.545	0.02	2			12.433		0.712	0.034	2		0.6265	0.0045	2		0.744	0.012	2		0.619	0.031	2		0.6095
12.45		0.788	0.016	2		0.511	0.14	2		0.6395	0.0105	2		0.676	0.018	2		0.229	0.073	2		0.0915	0.0215	2		0.5445	0.0215	2			12.45		0.7145	0.0345	2		0.628	0.005	2		0.745	0.012	2		0.6175	0.0325	2		0.609
12.467		0.7885	0.0145	2		0.5115	0.1405	2		0.638	0.011	2		0.6755	0.0175	2		0.228	0.073	2		0.091	0.021	2		0.5445	0.0215	2			12.467		0.7125	0.0355	2		0.6265	0.0085	2		0.745	0.01	2		0.619	0.034	2		0.6125
12.483		0.7885	0.0135	2		0.5105	0.1405	2		0.639	0.01	2		0.675	0.018	2		0.228	0.072	2		0.0915	0.0215	2		0.544	0.021	2			12.483		0.7095	0.0335	2		0.6265	0.0085	2		0.745	0.012	2		0.622	0.037	2		0.61
12.5		0.789	0.016	2		0.51	0.139	2		0.6375	0.0095	2		0.673	0.019	2		0.228	0.073	2		0.091	0.021	2		0.5435	0.0215	2			12.5		0.7075	0.0365	2		0.628	0.009	2		0.7465	0.0115	2		0.622	0.034	2		0.6085
12.517		0.7875	0.0195	2		0.51	0.141	2		0.638	0.009	2		0.674	0.019	2		0.227	0.072	2		0.0915	0.0215	2		0.5445	0.0215	2			12.517		0.7095	0.0355	2		0.6255	0.0055	2		0.7465	0.0115	2		0.6215	0.0375	2		0.6075
12.533		0.788	0.015	2		0.51	0.138	2		0.6375	0.0085	2		0.671	0.018	2		0.229	0.073	2		0.0905	0.0215	2		0.544	0.021	2			12.533		0.713	0.035	2		0.626	0.005	2		0.7435	0.0115	2		0.621	0.035	2		0.609
12.55		0.788	0.016	2		0.5105	0.1395	2		0.637	0.009	2		0.6755	0.0175	2		0.228	0.073	2		0.0905	0.0215	2		0.544	0.022	2			12.55		0.717	0.026	2		0.6275	0.0075	2		0.7455	0.0115	2		0.622	0.037	2		0.6095
12.567		0.7865	0.0185	2		0.5085	0.1395	2		0.6365	0.0085	2		0.674	0.017	2		0.2275	0.0715	2		0.0905	0.0215	2		0.542	0.021	2			12.567		0.725	0.023	2		0.625	0.005	2		0.7415	0.0115	2		0.6205	0.0375	2		0.61
12.583		0.7875	0.0155	2		0.5095	0.1385	2		0.6365	0.0095	2		0.6735	0.0165	2		0.228	0.073	2		0.0905	0.0215	2		0.543	0.021	2			12.583		0.7175	0.0275	2		0.6265	0.0045	2		0.743	0.012	2		0.6215	0.0365	2		0.6115
12.6		0.789	0.016	2		0.511	0.14	2		0.6365	0.0095	2		0.6725	0.0175	2		0.228	0.073	2		0.0905	0.0215	2		0.542	0.021	2			12.6		0.7125	0.0365	2		0.625	0.006	2		0.744	0.012	2		0.621	0.036	2		0.612
12.617		0.787	0.017	2		0.511	0.14	2		0.635	0.009	2		0.67	0.018	2		0.228	0.073	2		0.09	0.022	2		0.542	0.021	2			12.617		0.712	0.034	2		0.6275	0.0065	2		0.745	0.012	2		0.623	0.037	2		0.6065
12.633		0.7885	0.0155	2		0.5095	0.1395	2		0.637	0.01	2		0.672	0.017	2		0.2275	0.0725	2		0.09	0.022	2		0.5415	0.0205	2			12.633		0.7115	0.0345	2		0.626	0.008	2		0.744	0.012	2		0.618	0.033	2		0.6085
12.65		0.789	0.014	2		0.508	0.14	2		0.636	0.008	2		0.673	0.017	2		0.2265	0.0715	2		0.09	0.022	2		0.5425	0.0205	2			12.65		0.712	0.035	2		0.6255	0.0065	2		0.7425	0.0115	2		0.621	0.035	2		0.6085
12.667		0.7865	0.0145	2		0.5085	0.1395	2		0.6355	0.0085	2		0.6735	0.0165	2		0.2265	0.0715	2		0.0895	0.0215	2		0.543	0.021	2			12.667		0.71	0.038	2		0.625	0.006	2		0.743	0.012	2		0.6185	0.0335	2		0.6075
12.683		0.787	0.016	2		0.5095	0.1385	2		0.6355	0.0085	2		0.672	0.017	2		0.2285	0.0725	2		0.0895	0.0215	2		0.5415	0.0205	2			12.683		0.7075	0.0325	2		0.628	0.006	2		0.741	0.012	2		0.6195	0.0365	2		0.611
12.7		0.787	0.015	2		0.514	0.138	2		0.6355	0.0095	2		0.67	0.018	2		0.231	0.076	2		0.0895	0.0215	2		0.539	0.02	2			12.7		0.71	0.034	2		0.626	0.009	2		0.742	0.012	2		0.6205	0.0365	2		0.608
12.717		0.785	0.017	2		0.51	0.138	2		0.6345	0.0105	2		0.67	0.019	2		0.228	0.074	2		0.089	0.022	2		0.54	0.021	2			12.717		0.7105	0.0325	2		0.625	0.007	2		0.7435	0.0105	2		0.6165	0.0345	2		0.6085
12.733		0.787	0.014	2		0.509	0.14	2		0.634	0.009	2		0.6715	0.0175	2		0.2265	0.0725	2		0.089	0.022	2		0.54	0.02	2			12.733		0.707	0.036	2		0.6245	0.0045	2		0.7405	0.0115	2		0.621	0.037	2		0.6065
12.75		0.789	0.015	2		0.508	0.14	2		0.634	0.009	2		0.673	0.018	2		0.2265	0.0715	2		0.0885	0.0225	2		0.5395	0.0215	2			12.75		0.7105	0.0345	2		0.6295	0.0055	2		0.7405	0.0115	2		0.617	0.031	2		0.6065
12.767		0.785	0.016	2		0.5075	0.1385	2		0.6355	0.0095	2		0.671	0.018	2		0.2265	0.0725	2		0.089	0.022	2		0.539	0.022	2			12.767		0.712	0.036	2		0.626	0.006	2		0.741	0.012	2		0.62	0.036	2		0.609
12.783		0.7865	0.0155	2		0.51	0.139	2		0.6345	0.0095	2		0.672	0.018	2		0.2275	0.0735	2		0.0885	0.0215	2		0.538	0.019	2			12.783		0.7095	0.0355	2		0.628	0.007	2		0.7395	0.0115	2		0.621	0.036	2		0.6095
12.8		0.7885	0.0165	2		0.508	0.14	2		0.6315	0.0085	2		0.6695	0.0185	2		0.226	0.072	2		0.089	0.022	2		0.537	0.02	2			12.8		0.71	0.037	2		0.6275	0.0045	2		0.742	0.011	2		0.621	0.036	2		0.6095
12.817		0.7865	0.0155	2		0.509	0.14	2		0.633	0.011	2		0.668	0.018	2		0.2265	0.0725	2		0.089	0.022	2		0.5385	0.0205	2			12.817		0.711	0.034	2		0.6215	0.0035	2		0.7415	0.0125	2		0.623	0.041	2		0.6085
12.833		0.783	0.015	2		0.5065	0.1395	2		0.633	0.008	2		0.6695	0.0185	2		0.2255	0.0715	2		0.088	0.022	2		0.537	0.02	2			12.833		0.7105	0.0335	2		0.6255	0.0065	2		0.7425	0.0125	2		0.6185	0.0355	2		0.6075
12.85		0.788	0.015	2		0.503	0.139	2		0.6325	0.0105	2		0.67	0.018	2		0.224	0.069	2		0.0875	0.0215	2		0.5365	0.0195	2			12.85		0.71	0.033	2		0.622	0.007	2		0.741	0.012	2		0.6215	0.0365	2		0.607
12.867		0.787	0.017	2		0.505	0.14	2		0.631	0.01	2		0.668	0.018	2		0.225	0.07	2		0.088	0.022	2		0.536	0.021	2			12.867		0.7115	0.0355	2		0.624	0.004	2		0.741	0.012	2		0.62	0.035	2		0.609
12.883		0.787	0.016	2		0.5045	0.1395	2		0.6325	0.0095	2		0.6695	0.0175	2		0.2245	0.0705	2		0.0875	0.0215	2		0.537	0.02	2			12.883		0.712	0.035	2		0.622	0.003	2		0.74	0.012	2		0.6215	0.0385	2		0.607
12.9		0.7855	0.0165	2		0.5035	0.1415	2		0.633	0.01	2		0.6685	0.0175	2		0.223	0.068	2		0.088	0.022	2		0.538	0.021	2			12.9		0.709	0.036	2		0.625	0.003	2		0.739	0.012	2		0.619	0.037	2		0.6115
12.917		0.7855	0.0175	2		0.505	0.14	2		0.631	0.009	2		0.6685	0.0175	2		0.224	0.07	2		0.0875	0.0225	2		0.5375	0.0215	2			12.917		0.7085	0.0325	2		0.6215	0.0035	2		0.743	0.012	2		0.619	0.037	2		0.6065
12.933		0.788	0.017	2		0.505	0.139	2		0.632	0.009	2		0.666	0.017	2		0.2245	0.0705	2		0.0875	0.0215	2		0.536	0.021	2			12.933		0.711	0.036	2		0.621	0.004	2		0.739	0.012	2		0.622	0.039	2		0.6045
12.95		0.785	0.016	2		0.507	0.138	2		0.631	0.009	2		0.668	0.018	2		0.2265	0.0725	2		0.087	0.022	2		0.537	0.022	2			12.95		0.7085	0.0335	2		0.623	0.006	2		0.74	0.012	2		0.6205	0.0395	2		0.606
12.967		0.7865	0.0175	2		0.505	0.139	2		0.6315	0.0105	2		0.6665	0.0185	2		0.2245	0.0705	2		0.0875	0.0225	2		0.536	0.021	2			12.967		0.707	0.036	2		0.624	0.006	2		0.7435	0.0125	2		0.6195	0.0355	2		0.6065
12.983		0.787	0.018	2		0.507	0.137	2		0.6325	0.0105	2		0.665	0.019	2		0.2265	0.0735	2		0.0875	0.0225	2		0.536	0.022	2			12.983		0.7075	0.0345	2		0.6245	0.0055	2		0.737	0.012	2		0.619	0.036	2		0.606
13		0.784	0.017	2		0.5045	0.1395	2		0.6295	0.0095	2		0.6685	0.0185	2		0.2245	0.0705	2		0.0875	0.0235	2		0.5365	0.0205	2			13		0.7085	0.0335	2		0.626	0.007	2		0.7385	0.0125	2		0.6185	0.0355	2		0.6065
13.017		0.787	0.016	2		0.504	0.137	2		0.6305	0.0105	2		0.664	0.018	2		0.225	0.072	2		0.0875	0.0225	2		0.5345	0.0225	2			13.017		0.712	0.036	2		0.6255	0.0035	2		0.7395	0.0125	2		0.6235	0.0385	2		0.6035
13.033		0.7865	0.0165	2		0.505	0.137	2		0.631	0.009	2		0.6655	0.0175	2		0.2255	0.0725	2		0.086	0.022	2		0.535	0.022	2			13.033		0.7075	0.0345	2		0.6265	0.0035	2		0.741	0.013	2		0.623	0.041	2		0.6085
13.05		0.786	0.015	2		0.503	0.139	2		0.629	0.01	2		0.665	0.018	2		0.223	0.071	2		0.086	0.022	2		0.5325	0.0205	2			13.05		0.709	0.037	2		0.626	0.007	2		0.7375	0.0165	2		0.616	0.034	2		0.6045
13.067		0.786	0.016	2		0.5045	0.1375	2		0.6285	0.0085	2		0.6675	0.0175	2		0.225	0.072	2		0.086	0.022	2		0.532	0.022	2			13.067		0.707	0.036	2		0.623	0.003	2		0.7425	0.0115	2		0.617	0.034	2		0.6065
13.083		0.782	0.017	2		0.505	0.139	2		0.6295	0.0115	2		0.665	0.018	2		0.2235	0.0715	2		0.0855	0.0215	2		0.534	0.021	2			13.083		0.7065	0.0345	2		0.6215	0.0065	2		0.7415	0.0125	2		0.617	0.034	2		0.607
13.1		0.782	0.016	2		0.504	0.137	2		0.6295	0.0105	2		0.664	0.018	2		0.2235	0.0725	2		0.086	0.022	2		0.5325	0.0225	2			13.1		0.7095	0.0355	2		0.623	0.007	2		0.7435	0.0115	2		0.615	0.034	2		0.6075
13.117		0.7845	0.0155	2		0.5055	0.1375	2		0.628	0.009	2		0.6635	0.0185	2		0.2245	0.0735	2		0.086	0.022	2		0.531	0.021	2			13.117		0.709	0.032	2		0.624	0.007	2		0.7375	0.0115	2		0.6235	0.0415	2		0.606
13.133		0.7825	0.0175	2		0.5005	0.1375	2		0.6285	0.0105	2		0.663	0.018	2		0.222	0.071	2		0.0855	0.0215	2		0.531	0.019	2			13.133		0.7075	0.0375	2		0.623	0.006	2		0.7405	0.0125	2		0.6165	0.0355	2		0.606
13.15		0.7825	0.0175	2		0.5035	0.1385	2		0.6285	0.0095	2		0.665	0.017	2		0.222	0.072	2		0.0855	0.0225	2		0.533	0.021	2			13.15		0.711	0.034	2		0.6235	0.0045	2		0.7415	0.0115	2		0.6195	0.0385	2		0.6055
13.167		0.784	0.016	2		0.5025	0.1375	2		0.626	0.01	2		0.6635	0.0175	2		0.222	0.072	2		0.0855	0.0225	2		0.531	0.022	2			13.167		0.707	0.038	2		0.6235	0.0035	2		0.737	0.012	2		0.617	0.034	2		0.6045
13.183		0.7835	0.0155	2		0.5035	0.1385	2		0.6285	0.0105	2		0.6615	0.0185	2		0.2225	0.0725	2		0.0855	0.0225	2		0.5325	0.0205	2			13.183		0.709	0.034	2		0.6225	0.0055	2		0.7365	0.0125	2		0.6195	0.0365	2		0.6075
13.2		0.781	0.017	2		0.5035	0.1385	2		0.629	0.008	2		0.664	0.017	2		0.222	0.073	2		0.085	0.022	2		0.531	0.021	2			13.2		0.707	0.036	2		0.621	0.005	2		0.7375	0.0115	2		0.6195	0.0395	2		0.6045
13.217		0.7805	0.0155	2		0.501	0.138	2		0.627	0.01	2		0.663	0.018	2		0.221	0.071	2		0.085	0.022	2		0.5315	0.0205	2			13.217		0.71	0.035	2		0.6225	0.0015	2		0.7365	0.0145	2		0.618	0.037	2		0.6075
13.233		0.782	0.017	2		0.5025	0.1375	2		0.627	0.009	2		0.662	0.018	2		0.2215	0.0725	2		0.0845	0.0225	2		0.5295	0.0205	2			13.233		0.7075	0.0355	2		0.6215	0.0045	2		0.736	0.012	2		0.6195	0.0385	2		0.6065
13.25		0.7835	0.0165	2		0.5025	0.1375	2		0.6285	0.0105	2		0.661	0.017	2		0.221	0.073	2		0.085	0.022	2		0.5305	0.0205	2			13.25		0.708	0.036	2		0.6215	0.0055	2		0.737	0.012	2		0.6175	0.0375	2		0.604
13.267		0.784	0.017	2		0.503	0.137	2		0.626	0.01	2		0.662	0.018	2		0.2225	0.0735	2		0.0845	0.0225	2		0.53	0.02	2			13.267		0.707	0.035	2		0.625	0.006	2		0.738	0.012	2		0.623	0.043	2		0.604
13.283		0.781	0.017	2		0.504	0.137	2		0.6265	0.0105	2		0.6645	0.0175	2		0.222	0.074	2		0.085	0.022	2		0.5295	0.0195	2			13.283		0.7075	0.0345	2		0.62	0.001	2		0.742	0.012	2		0.616	0.035	2		0.6035
13.3		0.783	0.017	2		0.5035	0.1375	2		0.627	0.01	2		0.6625	0.0185	2		0.2215	0.0735	2		0.0845	0.0225	2		0.529	0.022	2			13.3		0.7085	0.0355	2		0.625	0.009	2		0.739	0.012	2		0.6205	0.0385	2		0.606
13.317		0.784	0.017	2		0.503	0.137	2		0.626	0.011	2		0.661	0.017	2		0.2215	0.0735	2		0.0845	0.0225	2		0.529	0.021	2			13.317		0.706	0.032	2		0.622	0.007	2		0.739	0.012	2		0.6105	0.0305	2		0.604
13.333		0.7825	0.0185	2		0.5005	0.1375	2		0.6255	0.0115	2		0.66	0.017	2		0.22	0.072	2		0.0845	0.0215	2		0.5295	0.0215	2			13.333		0.7065	0.0335	2		0.624	0.007	2		0.74	0.011	2		0.617	0.036	2		0.6055
13.35		0.782	0.019	2		0.5005	0.1375	2		0.626	0.012	2		0.659	0.019	2		0.2195	0.0725	2		0.084	0.022	2		0.5285	0.0215	2			13.35		0.7065	0.0375	2		0.6225	0.0065	2		0.738	0.012	2		0.614	0.035	2		0.603
13.367		0.783	0.017	2		0.5005	0.1385	2		0.626	0.01	2		0.66	0.018	2		0.2185	0.0725	2		0.0835	0.0215	2		0.5285	0.0195	2			13.367		0.7065	0.0335	2		0.624	0.006	2		0.74	0.012	2		0.6165	0.0355	2		0.605
13.383		0.781	0.019	2		0.5035	0.1365	2		0.6255	0.0105	2		0.6595	0.0175	2		0.221	0.075	2		0.0835	0.0215	2		0.5285	0.0205	2			13.383		0.707	0.033	2		0.621	0.003	2		0.738	0.012	2		0.619	0.04	2		0.6045
13.4		0.7815	0.0175	2		0.501	0.138	2		0.625	0.009	2		0.6585	0.0185	2		0.219	0.073	2		0.0835	0.0225	2		0.528	0.022	2			13.4		0.7065	0.0325	2		0.6215	0.0065	2		0.7385	0.0115	2		0.6195	0.0395	2		0.602
13.417		0.7825	0.0185	2		0.502	0.137	2		0.624	0.009	2		0.6585	0.0185	2		0.22	0.075	2		0.083	0.022	2		0.526	0.021	2			13.417		0.704	0.034	2		0.6235	0.0065	2		0.735	0.012	2		0.615	0.036	2		0.605
13.433		0.7805	0.0175	2		0.499	0.138	2		0.623	0.01	2		0.6595	0.0185	2		0.2175	0.0725	2		0.0835	0.0215	2		0.527	0.022	2			13.433		0.707	0.035	2		0.621	0.003	2		0.7355	0.0125	2		0.617	0.037	2		0.6045
13.45		0.779	0.016	2		0.498	0.138	2		0.624	0.012	2		0.66	0.018	2		0.2175	0.0715	2		0.0825	0.0215	2		0.527	0.02	2			13.45		0.706	0.034	2		0.6225	0.0075	2		0.737	0.012	2		0.618	0.038	2		0.607
13.467		0.78	0.017	2		0.498	0.137	2		0.624	0.009	2		0.6595	0.0165	2		0.2175	0.0725	2		0.083	0.022	2		0.524	0.022	2			13.467		0.7095	0.0355	2		0.621	0.005	2		0.738	0.012	2		0.6155	0.0375	2		0.6055
13.483		0.7815	0.0185	2		0.499	0.138	2		0.6245	0.0115	2		0.659	0.02	2		0.2175	0.0725	2		0.083	0.022	2		0.526	0.022	2			13.483		0.7095	0.0355	2		0.621	0.008	2		0.739	0.012	2		0.6205	0.0395	2		0.602
13.5		0.78	0.017	2		0.499	0.136	2		0.623	0.01	2		0.659	0.018	2		0.2185	0.0735	2		0.083	0.022	2		0.5265	0.0205	2			13.5		0.7065	0.0365	2		0.6225	0.0055	2		0.7375	0.0125	2		0.6155	0.0345	2		0.607
13.517		0.7805	0.0185	2		0.501	0.137	2		0.6235	0.0105	2		0.6585	0.0185	2		0.219	0.075	2		0.083	0.022	2		0.527	0.022	2			13.517		0.7065	0.0355	2		0.6215	0.0095	2		0.739	0.012	2		0.621	0.041	2		0.604
13.533		0.78	0.018	2		0.497	0.136	2		0.6215	0.0095	2		0.6595	0.0175	2		0.2175	0.0725	2		0.0825	0.0215	2		0.5255	0.0205	2			13.533		0.7075	0.0345	2		0.6235	0.0055	2		0.738	0.012	2		0.619	0.04	2		0.6055
13.55		0.7815	0.0165	2		0.498	0.136	2		0.623	0.011	2		0.658	0.019	2		0.217	0.074	2		0.082	0.022	2		0.5245	0.0205	2			13.55		0.707	0.035	2		0.6235	0.0045	2		0.7355	0.0125	2		0.6195	0.0415	2		0.608
13.567		0.782	0.017	2		0.5005	0.1355	2		0.6205	0.0095	2		0.659	0.019	2		0.2195	0.0755	2		0.0825	0.0225	2		0.525	0.021	2			13.567		0.705	0.033	2		0.622	0.001	2		0.735	0.012	2		0.61	0.031	2		0.602
13.583		0.78	0.019	2		0.501	0.135	2		0.6225	0.0095	2		0.6555	0.0185	2		0.2205	0.0755	2		0.0815	0.0215	2		0.5235	0.0205	2			13.583		0.7055	0.0345	2		0.619	0.004	2		0.736	0.012	2		0.6205	0.0415	2		0.605
13.6		0.78	0.016	2		0.5005	0.1345	2		0.622	0.01	2		0.6575	0.0185	2		0.2195	0.0755	2		0.0815	0.0215	2		0.523	0.021	2			13.6		0.707	0.034	2		0.624	0.008	2		0.74	0.012	2		0.615	0.035	2		0.604
13.617		0.7805	0.0175	2		0.499	0.136	2		0.619	0.01	2		0.6545	0.0185	2		0.218	0.074	2		0.0815	0.0215	2		0.524	0.022	2			13.617		0.7075	0.0335	2		0.625	0.003	2		0.7385	0.0125	2		0.62	0.039	2		0.6055
13.633		0.7835	0.0165	2		0.5005	0.1345	2		0.6205	0.0085	2		0.6565	0.0185	2		0.2195	0.0755	2		0.0815	0.0215	2		0.5245	0.0215	2			13.633		0.7055	0.0335	2		0.624	0.007	2		0.7395	0.0125	2		0.617	0.04	2		0.604
13.65		0.7805	0.0155	2		0.5	0.133	2		0.6185	0.0085	2		0.6565	0.0185	2		0.221	0.076	2		0.081	0.022	2		0.525	0.023	2			13.65		0.706	0.035	2		0.621	0.008	2		0.737	0.013	2		0.6175	0.0395	2		0.6035
13.667		0.7805	0.0175	2		0.499	0.134	2		0.619	0.011	2		0.655	0.018	2		0.219	0.075	2		0.0815	0.0215	2		0.5215	0.0205	2			13.667		0.702	0.034	2		0.623	0.005	2		0.7385	0.0125	2		0.619	0.038	2		0.6035
13.683		0.7825	0.0165	2		0.5	0.135	2		0.619	0.01	2		0.6525	0.0185	2		0.2195	0.0755	2		0.0815	0.0215	2		0.5235	0.0215	2			13.683		0.704	0.031	2		0.6215	0.0045	2		0.739	0.012	2		0.616	0.037	2		0.6055
13.7		0.781	0.016	2		0.499	0.136	2		0.6185	0.0095	2		0.654	0.018	2		0.218	0.074	2		0.0815	0.0215	2		0.5225	0.0225	2			13.7		0.705	0.037	2		0.622	0.004	2		0.74	0.012	2		0.616	0.038	2		0.603
13.717		0.778	0.016	2		0.4975	0.1355	2		0.618	0.01	2		0.655	0.018	2		0.2175	0.0735	2		0.0815	0.0215	2		0.523	0.021	2			13.717		0.705	0.033	2		0.62	0.01	2		0.7385	0.0125	2		0.6195	0.0395	2		0.599
13.733		0.779	0.016	2		0.497	0.137	2		0.617	0.01	2		0.6555	0.0175	2		0.216	0.072	2		0.081	0.022	2		0.5225	0.0215	2			13.733		0.704	0.034	2		0.623	0.006	2		0.7375	0.0125	2		0.6195	0.0385	2		0.605
13.75		0.779	0.015	2		0.4995	0.1335	2		0.6205	0.0095	2		0.6515	0.0195	2		0.22	0.075	2		0.0805	0.0215	2		0.521	0.021	2			13.75		0.706	0.035	2		0.6205	0.0045	2		0.7385	0.0125	2		0.618	0.039	2		0.603
13.767		0.7805	0.0175	2		0.498	0.137	2		0.6185	0.0105	2		0.653	0.018	2		0.2175	0.0725	2		0.081	0.022	2		0.5215	0.0225	2			13.767		0.704	0.032	2		0.619	0.004	2		0.74	0.012	2		0.62	0.04	2		0.6065
13.783		0.775	0.016	2		0.496	0.135	2		0.62	0.009	2		0.651	0.018	2		0.217	0.073	2		0.0815	0.0215	2		0.5205	0.0205	2			13.783		0.705	0.038	2		0.619	0.005	2		0.74	0.012	2		0.618	0.041	2		0.6035
13.8		0.7805	0.0165	2		0.4965	0.1355	2		0.618	0.01	2		0.6535	0.0185	2		0.217	0.073	2		0.0805	0.0215	2		0.5205	0.0205	2			13.8		0.7045	0.0365	2		0.6215	0.0085	2		0.7385	0.0095	2		0.6145	0.0365	2		0.604
13.817		0.7785	0.0165	2		0.497	0.136	2		0.6175	0.0105	2		0.651	0.018	2		0.217	0.073	2		0.0805	0.0215	2		0.5205	0.0205	2			13.817		0.703	0.035	2		0.62	0.007	2		0.7365	0.0115	2		0.617	0.038	2		0.605
13.833		0.781	0.017	2		0.496	0.136	2		0.616	0.011	2		0.6535	0.0175	2		0.2165	0.0725	2		0.0805	0.0215	2		0.52	0.022	2			13.833		0.7015	0.0395	2		0.6195	0.0055	2		0.736	0.012	2		0.6165	0.0375	2		0.606
13.85		0.7785	0.0155	2		0.4945	0.1355	2		0.6175	0.0105	2		0.652	0.018	2		0.2155	0.0725	2		0.0805	0.0215	2		0.52	0.021	2			13.85		0.7055	0.0365	2		0.62	0.005	2		0.7385	0.0105	2		0.617	0.035	2		0.603
13.867		0.777	0.017	2		0.497	0.135	2		0.6175	0.0125	2		0.652	0.019	2		0.2175	0.0735	2		0.0795	0.0215	2		0.519	0.022	2			13.867		0.705	0.037	2		0.622	0.007	2		0.739	0.013	2		0.6155	0.0345	2		0.6045
13.883		0.779	0.017	2		0.496	0.135	2		0.618	0.012	2		0.6495	0.0175	2		0.2175	0.0735	2		0.08	0.022	2		0.517	0.023	2			13.883		0.7045	0.0365	2		0.622	0.008	2		0.738	0.012	2		0.6135	0.0355	2		0.602
13.9		0.778	0.019	2		0.4975	0.1335	2		0.615	0.012	2		0.6515	0.0175	2		0.218	0.075	2		0.08	0.022	2		0.5185	0.0215	2			13.9		0.703	0.037	2		0.618	0.004	2		0.739	0.012	2		0.615	0.037	2		0.605
13.917		0.779	0.016	2		0.498	0.133	2		0.6155	0.0115	2		0.649	0.019	2		0.2185	0.0755	2		0.08	0.022	2		0.5185	0.0215	2			13.917		0.705	0.04	2		0.617	0.007	2		0.737	0.013	2		0.616	0.039	2		0.605
13.933		0.78	0.017	2		0.497	0.134	2		0.615	0.012	2		0.6495	0.0195	2		0.2175	0.0745	2		0.0795	0.0225	2		0.5185	0.0215	2			13.933		0.7045	0.0355	2		0.618	0.009	2		0.732	0.012	2		0.613	0.036	2		0.6035
13.95		0.78	0.017	2		0.496	0.133	2		0.615	0.011	2		0.651	0.019	2		0.217	0.075	2		0.0795	0.0215	2		0.519	0.021	2			13.95		0.704	0.038	2		0.622	0.006	2		0.7355	0.0095	2		0.615	0.036	2		0.603
13.967		0.7815	0.0175	2		0.497	0.133	2		0.6155	0.0105	2		0.65	0.019	2		0.2175	0.0755	2		0.0795	0.0215	2		0.518	0.022	2			13.967		0.7035	0.0365	2		0.622	0.009	2		0.739	0.012	2		0.616	0.04	2		0.604
13.983		0.781	0.019	2		0.5005	0.1325	2		0.6145	0.0105	2		0.651	0.019	2		0.2195	0.0775	2		0.0795	0.0215	2		0.5185	0.0215	2			13.983		0.7045	0.0365	2		0.6215	0.0065	2		0.737	0.011	2		0.619	0.042	2		0.6065
14		0.7775	0.0185	2		0.498	0.134	2		0.615	0.01	2		0.6505	0.0185	2		0.2185	0.0755	2		0.079	0.022	2		0.5155	0.0205	2			14		0.7025	0.0355	2		0.6215	0.0065	2		0.7405	0.0115	2		0.6145	0.0385	2		0.603
14.017		0.779	0.019	2		0.4995	0.1315	2		0.613	0.011	2		0.649	0.019	2		0.2205	0.0775	2		0.079	0.022	2		0.516	0.021	2			14.017		0.703	0.035	2		0.6215	0.0065	2		0.74	0.013	2		0.612	0.037	2		0.6045
14.033		0.779	0.017	2		0.496	0.132	2		0.612	0.012	2		0.6495	0.0195	2		0.218	0.076	2		0.0785	0.0215	2		0.5165	0.0215	2			14.033		0.7025	0.0365	2		0.62	0.006	2		0.739	0.012	2		0.6135	0.0365	2		0.603
14.05		0.778	0.017	2		0.497	0.131	2		0.614	0.012	2		0.6485	0.0185	2		0.219	0.077	2		0.079	0.022	2		0.517	0.022	2			14.05		0.704	0.033	2		0.621	0.009	2		0.7375	0.0115	2		0.616	0.038	2		0.6055
14.067		0.7775	0.0165	2		0.496	0.132	2		0.6115	0.0095	2		0.648	0.019	2		0.2175	0.0755	2		0.0795	0.0215	2		0.516	0.023	2			14.067		0.701	0.033	2		0.618	0.005	2		0.737	0.011	2		0.613	0.038	2		0.6025
14.083		0.776	0.016	2		0.4985	0.1305	2		0.614	0.012	2		0.648	0.019	2		0.2195	0.0785	2		0.0785	0.0215	2		0.5155	0.0225	2			14.083		0.702	0.038	2		0.6185	0.0065	2		0.732	0.012	2		0.6175	0.0405	2		0.6025
14.1		0.7735	0.0175	2		0.496	0.132	2		0.6105	0.0115	2		0.647	0.019	2		0.217	0.076	2		0.0785	0.0215	2		0.514	0.02	2			14.1		0.7035	0.0355	2		0.6185	0.0075	2		0.7325	0.0115	2		0.6165	0.0395	2		0.603
14.117		0.7755	0.0185	2		0.4975	0.1305	2		0.611	0.011	2		0.6475	0.0195	2		0.219	0.078	2		0.079	0.022	2		0.5165	0.0215	2			14.117		0.702	0.035	2		0.6185	0.0045	2		0.7355	0.0095	2		0.617	0.04	2		0.6025
14.133		0.7755	0.0185	2		0.4955	0.1305	2		0.613	0.012	2		0.648	0.019	2		0.218	0.076	2		0.078	0.022	2		0.5145	0.0225	2			14.133		0.706	0.037	2		0.621	0.009	2		0.7365	0.0135	2		0.618	0.041	2		0.6035
14.15		0.777	0.015	2		0.496	0.13	2		0.6115	0.0115	2		0.6465	0.0185	2		0.2185	0.0775	2		0.0785	0.0215	2		0.5145	0.0225	2			14.15		0.7005	0.0365	2		0.617	0.004	2		0.739	0.012	2		0.616	0.039	2		0.604
14.167		0.777	0.017	2		0.4975	0.1275	2		0.613	0.013	2		0.6485	0.0185	2		0.22	0.08	2		0.0785	0.0215	2		0.514	0.022	2			14.167		0.7035	0.0345	2		0.6155	0.0035	2		0.735	0.012	2		0.617	0.039	2		0.603
14.183		0.775	0.018	2		0.496	0.129	2		0.6115	0.0115	2		0.6465	0.0195	2		0.218	0.078	2		0.078	0.022	2		0.5135	0.0215	2			14.183		0.7015	0.0365	2		0.619	0.005	2		0.737	0.012	2		0.6145	0.0385	2		0.6025
14.2		0.776	0.016	2		0.5	0.126	2		0.6105	0.0125	2		0.6465	0.0195	2		0.2215	0.0825	2		0.078	0.022	2		0.514	0.021	2			14.2		0.702	0.035	2		0.62	0.009	2		0.737	0.012	2		0.618	0.041	2		0.6045
14.217		0.778	0.016	2		0.498	0.127	2		0.6105	0.0095	2		0.647	0.019	2		0.2205	0.0805	2		0.078	0.022	2		0.514	0.021	2			14.217		0.7015	0.0365	2		0.6175	0.0065	2		0.737	0.012	2		0.6145	0.0375	2		0.6015
14.233		0.7775	0.0155	2		0.4955	0.1285	2		0.611	0.01	2		0.6465	0.0195	2		0.2175	0.0785	2		0.078	0.022	2		0.514	0.022	2			14.233		0.7005	0.0385	2		0.618	0.002	2		0.7355	0.0115	2		0.6155	0.0375	2		0.602
14.25		0.777	0.018	2		0.497	0.127	2		0.609	0.011	2		0.6465	0.0185	2		0.22	0.08	2		0.0775	0.0215	2		0.514	0.021	2			14.25		0.7025	0.0375	2		0.621	0.006	2		0.7345	0.0125	2		0.6195	0.0425	2		0.6025
14.267		0.7775	0.0185	2		0.4965	0.1295	2		0.6095	0.0125	2		0.6425	0.0195	2		0.218	0.079	2		0.078	0.022	2		0.512	0.02	2			14.267		0.701	0.038	2		0.617	0.006	2		0.732	0.012	2		0.615	0.038	2		0.602
14.283		0.779	0.016	2		0.493	0.13	2		0.608	0.011	2		0.6455	0.0195	2		0.2155	0.0775	2		0.0775	0.0215	2		0.512	0.022	2			14.283		0.7005	0.0375	2		0.619	0.009	2		0.7345	0.0105	2		0.6155	0.0405	2		0.6025
14.3		0.776	0.018	2		0.495	0.129	2		0.6075	0.0105	2		0.6445	0.0195	2		0.217	0.078	2		0.0775	0.0215	2		0.5115	0.0225	2			14.3		0.7035	0.0355	2		0.6195	0.0045	2		0.738	0.012	2		0.6195	0.0415	2		0.6045
14.317		0.777	0.017	2		0.4955	0.1295	2		0.609	0.01	2		0.643	0.02	2		0.217	0.078	2		0.0775	0.0215	2		0.5135	0.0225	2			14.317		0.7	0.036	2		0.6205	0.0045	2		0.7325	0.0125	2		0.6145	0.0395	2		0.5995
14.333		0.777	0.016	2		0.4955	0.1285	2		0.609	0.01	2		0.643	0.019	2		0.217	0.079	2		0.0775	0.0215	2		0.5125	0.0215	2			14.333		0.702	0.035	2		0.621	0.007	2		0.7335	0.0125	2		0.6125	0.0375	2		0.6025
14.35		0.7765	0.0185	2		0.4965	0.1295	2		0.608	0.011	2		0.6465	0.0185	2		0.2175	0.0795	2		0.077	0.021	2		0.5115	0.0225	2			14.35		0.702	0.035	2		0.6215	0.0065	2		0.735	0.013	2		0.611	0.036	2		0.6015
14.367		0.777	0.018	2		0.494	0.13	2		0.6075	0.0105	2		0.645	0.02	2		0.2155	0.0775	2		0.077	0.022	2		0.5115	0.0215	2			14.367		0.6995	0.0355	2		0.6205	0.0065	2		0.736	0.012	2		0.615	0.041	2		0.602
14.383		0.7745	0.0155	2		0.4945	0.1285	2		0.6085	0.0115	2		0.6445	0.0195	2		0.2175	0.0785	2		0.0765	0.0215	2		0.5105	0.0215	2			14.383		0.701	0.037	2		0.6195	0.0065	2		0.736	0.013	2		0.6175	0.0425	2		0.601
14.4		0.776	0.018	2		0.4945	0.1275	2		0.607	0.012	2		0.644	0.019	2		0.2175	0.0795	2		0.0765	0.0215	2		0.51	0.022	2			14.4		0.7035	0.0365	2		0.6205	0.0055	2		0.7345	0.0115	2		0.6175	0.0425	2		0.6005
14.417		0.7765	0.0165	2		0.494	0.129	2		0.6065	0.0095	2		0.6435	0.0195	2		0.216	0.078	2		0.0765	0.0215	2		0.509	0.022	2			14.417		0.703	0.036	2		0.6225	0.0075	2		0.735	0.013	2		0.6065	0.0315	2		0.602
14.433		0.776	0.019	2		0.4945	0.1255	2		0.6055	0.0095	2		0.643	0.019	2		0.2175	0.0815	2		0.0765	0.0215	2		0.51	0.023	2			14.433		0.7015	0.0325	2		0.617	0.007	2		0.736	0.012	2		0.6125	0.0375	2		0.6
14.45		0.7755	0.0175	2		0.493	0.128	2		0.6075	0.0115	2		0.6425	0.0195	2		0.2165	0.0785	2		0.0765	0.0215	2		0.51	0.022	2			14.45		0.7035	0.0335	2		0.619	0.005	2		0.7355	0.0115	2		0.612	0.038	2		0.6
14.467		0.7755	0.0175	2		0.493	0.129	2		0.6065	0.0105	2		0.6415	0.0205	2		0.216	0.078	2		0.076	0.021	2		0.5085	0.0205	2			14.467		0.6995	0.0375	2		0.6185	0.0055	2		0.7345	0.0125	2		0.6135	0.0385	2		0.601
14.483		0.7725	0.0195	2		0.494	0.127	2		0.608	0.01	2		0.6425	0.0195	2		0.2175	0.0795	2		0.0765	0.0215	2		0.51	0.023	2			14.483		0.701	0.037	2		0.622	0.006	2		0.7355	0.0125	2		0.6145	0.0395	2		0.601
14.5		0.773	0.018	2		0.4945	0.1265	2		0.606	0.011	2		0.6425	0.0195	2		0.2175	0.0805	2		0.076	0.022	2		0.509	0.022	2			14.5		0.6995	0.0355	2		0.617	0.006	2		0.737	0.012	2		0.6135	0.0385	2		0.602
14.517		0.7725	0.0215	2		0.494	0.126	2		0.6055	0.0125	2		0.642	0.019	2		0.217	0.08	2		0.0755	0.0215	2		0.5095	0.0215	2			14.517		0.6995	0.0355	2		0.6185	0.0055	2		0.7295	0.0125	2		0.6095	0.0365	2		0.6
14.533		0.7745	0.0195	2		0.492	0.127	2		0.606	0.011	2		0.6435	0.0185	2		0.216	0.078	2		0.0765	0.0215	2		0.5105	0.0225	2			14.533		0.7005	0.0345	2		0.6185	0.0045	2		0.7305	0.0125	2		0.6155	0.0405	2		0.602
14.55		0.776	0.019	2		0.4935	0.1265	2		0.606	0.011	2		0.64	0.019	2		0.217	0.08	2		0.0765	0.0215	2		0.509	0.022	2			14.55		0.7015	0.0355	2		0.6155	0.0055	2		0.7315	0.0125	2		0.6135	0.0405	2		0.6005
14.567		0.7745	0.0195	2		0.4945	0.1265	2		0.6065	0.0105	2		0.639	0.02	2		0.2175	0.0805	2		0.076	0.022	2		0.509	0.022	2			14.567		0.7	0.033	2		0.619	0.006	2		0.7325	0.0125	2		0.6125	0.0385	2		0.6
14.583		0.7775	0.0195	2		0.4965	0.1245	2		0.605	0.011	2		0.641	0.02	2		0.2195	0.0825	2		0.0755	0.0215	2		0.507	0.024	2			14.583		0.698	0.034	2		0.618	0.008	2		0.7325	0.0125	2		0.617	0.043	2		0.599
14.6		0.7755	0.0185	2		0.496	0.125	2		0.6045	0.0115	2		0.6425	0.0195	2		0.219	0.082	2		0.0755	0.0215	2		0.5065	0.0235	2			14.6		0.7015	0.0335	2		0.6175	0.0085	2		0.7345	0.0125	2		0.612	0.037	2		0.599
14.617		0.776	0.019	2		0.494	0.125	2		0.6035	0.0125	2		0.639	0.02	2		0.218	0.081	2		0.075	0.021	2		0.5085	0.0235	2			14.617		0.7015	0.0325	2		0.616	0.008	2		0.737	0.012	2		0.612	0.039	2		0.601
14.633		0.7745	0.0195	2		0.4935	0.1235	2		0.603	0.012	2		0.6395	0.0205	2		0.2185	0.0815	2		0.0755	0.0215	2		0.507	0.023	2			14.633		0.703	0.033	2		0.619	0.007	2		0.736	0.012	2		0.611	0.039	2		0.598
14.65		0.7755	0.0185	2		0.497	0.125	2		0.602	0.012	2		0.64	0.02	2		0.219	0.083	2		0.0755	0.0215	2		0.5065	0.0225	2			14.65		0.6985	0.0335	2		0.616	0.009	2		0.735	0.012	2		0.613	0.04	2		0.596
14.667		0.7745	0.0175	2		0.497	0.125	2		0.602	0.012	2		0.639	0.019	2		0.2195	0.0825	2		0.0755	0.0215	2		0.505	0.021	2			14.667		0.7005	0.0335	2		0.6185	0.0085	2		0.735	0.013	2		0.612	0.039	2		0.5995
14.683		0.7745	0.0165	2		0.4965	0.1255	2		0.6015	0.0105	2		0.64	0.019	2		0.219	0.082	2		0.0755	0.0215	2		0.5055	0.0215	2			14.683		0.7005	0.0315	2		0.6175	0.0055	2		0.736	0.013	2		0.6145	0.0415	2		0.5975
14.7		0.7745	0.0185	2		0.4965	0.1245	2		0.602	0.01	2		0.64	0.019	2		0.219	0.083	2		0.0755	0.0215	2		0.5065	0.0225	2			14.7		0.7	0.032	2		0.6185	0.0075	2		0.7355	0.0105	2		0.6175	0.0395	2		0.5985
14.717		0.773	0.019	2		0.497	0.125	2		0.602	0.009	2		0.638	0.02	2		0.219	0.083	2		0.075	0.021	2		0.505	0.021	2			14.717		0.6995	0.0325	2		0.6195	0.0045	2		0.7345	0.0125	2		0.613	0.036	2		0.599
14.733		0.7715	0.0195	2		0.492	0.124	2		0.602	0.011	2		0.637	0.019	2		0.217	0.08	2		0.075	0.022	2		0.503	0.022	2			14.733		0.7005	0.0345	2		0.616	0.007	2		0.736	0.012	2		0.6115	0.0385	2		0.6005
14.75		0.7735	0.0175	2		0.495	0.124	2		0.6015	0.0115	2		0.636	0.019	2		0.219	0.082	2		0.075	0.022	2		0.505	0.022	2			14.75		0.699	0.036	2		0.618	0.006	2		0.737	0.012	2		0.6105	0.0375	2		0.599
14.767		0.7755	0.0175	2		0.493	0.125	2		0.601	0.01	2		0.637	0.02	2		0.2165	0.0805	2		0.0745	0.0215	2		0.5045	0.0225	2			14.767		0.701	0.034	2		0.616	0.008	2		0.7375	0.0125	2		0.611	0.039	2		0.5985
14.783		0.7725	0.0195	2		0.495	0.124	2		0.6005	0.0085	2		0.6385	0.0195	2		0.2185	0.0825	2		0.0745	0.0215	2		0.503	0.02	2			14.783		0.7005	0.0355	2		0.6185	0.0065	2		0.7365	0.0135	2		0.6155	0.0425	2		0.6005
14.8		0.776	0.019	2		0.4935	0.1245	2		0.6005	0.0115	2		0.6385	0.0195	2		0.217	0.082	2		0.0745	0.0215	2		0.503	0.022	2			14.8		0.7035	0.0355	2		0.618	0.009	2		0.736	0.013	2		0.6105	0.0375	2		0.5975
14.817		0.7735	0.0175	2		0.494	0.124	2		0.6015	0.0115	2		0.6375	0.0185	2		0.218	0.082	2		0.0745	0.0215	2		0.505	0.023	2			14.817		0.6995	0.0365	2		0.617	0.007	2		0.738	0.012	2		0.613	0.04	2		0.5985
14.833		0.775	0.019	2		0.495	0.124	2		0.6015	0.0115	2		0.6355	0.0195	2		0.219	0.083	2		0.074	0.021	2		0.5025	0.0235	2			14.833		0.6975	0.0335	2		0.6185	0.0075	2		0.7355	0.0115	2		0.612	0.04	2		0.5985
14.85		0.775	0.018	2		0.4955	0.1235	2		0.6005	0.0105	2		0.6355	0.0205	2		0.219	0.083	2		0.074	0.021	2		0.502	0.023	2			14.85		0.695	0.034	2		0.618	0.007	2		0.729	0.013	2		0.614	0.043	2		0.6025
14.867		0.775	0.019	2		0.4925	0.1245	2		0.6015	0.0095	2		0.6355	0.0195	2		0.2165	0.0815	2		0.0745	0.0215	2		0.503	0.023	2			14.867		0.7015	0.0365	2		0.616	0.007	2		0.7305	0.0135	2		0.614	0.043	2		0.599
14.883		0.773	0.018	2		0.495	0.123	2		0.5995	0.0095	2		0.635	0.02	2		0.2195	0.0825	2		0.0745	0.0215	2		0.503	0.023	2			14.883		0.7	0.034	2		0.6155	0.0065	2		0.733	0.012	2		0.6135	0.0415	2		0.5965
14.9		0.774	0.018	2		0.4935	0.1255	2		0.601	0.011	2		0.633	0.02	2		0.217	0.081	2						0.5015	0.0205	2			14.9		0.6975	0.0375	2		0.6205	0.0085	2		0.7355	0.0125	2		0.613	0.042	2		0.5975
14.917		0.774	0.019	2		0.4935	0.1225	2		0.5985	0.0105	2		0.635	0.019	2		0.218	0.083	2						0.5005	0.0215	2			14.917		0.6985	0.0355	2		0.6175	0.0085	2		0.7325	0.0125	2		0.6085	0.0365	2		0.598
14.933		0.774	0.018	2		0.4945	0.1245	2		0.599	0.011	2		0.6365	0.0195	2		0.217	0.083	2						0.502	0.022	2			14.933		0.697	0.034	2		0.6155	0.0085	2		0.735	0.012	2		0.611	0.039	2		0.6005
14.95		0.7735	0.0185	2		0.4915	0.1245	2		0.5995	0.0105	2		0.6355	0.0195	2		0.216	0.081	2						0.5025	0.0235	2			14.95		0.6995	0.0375	2		0.619	0.009	2		0.7305	0.0125	2		0.6035	0.0325	2		0.597
14.967		0.7725	0.0205	2		0.4935	0.1245	2		0.599	0.009	2		0.638	0.019	2		0.2175	0.0815	2						0.5015	0.0225	2			14.967		0.7	0.034	2		0.6195	0.0075	2		0.7315	0.0125	2		0.612	0.042	2		0.5965
14.983		0.775	0.02	2		0.4925	0.1245	2		0.5985	0.0105	2		0.637	0.02	2										0.501	0.023	2			14.983		0.6985	0.0345	2		0.616	0.004	2		0.7325	0.0125	2		0.611	0.04	2		0.6
15						0.493	0.124	2						0.6345	0.0185	2										0.5	0.022	2			15		0.698	0.034	2		0.616	0.008	2		0.7335	0.0125	2		0.613	0.042	2		0.598
[truncated: 2 more columns]
