# Supplementary figures and images for: Distinct architectural requirements for the parS centromeric sequence of the pSM19035 plasmid partition machinery
Source: eLife journal article supplement (doi:10.7554/elife.79480), 2022-09-05

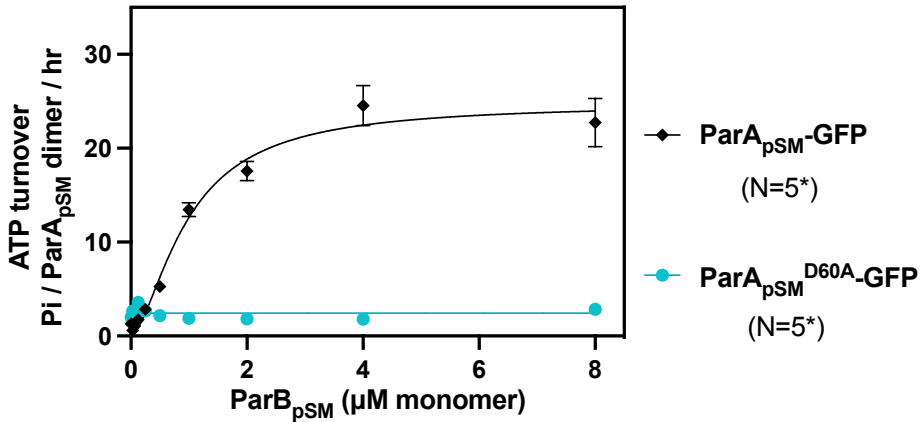

Supplement: supp [file elife-79480-supp-v1.zip]

A

## Binding

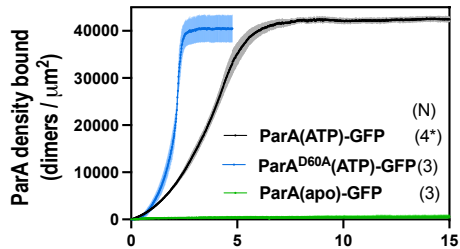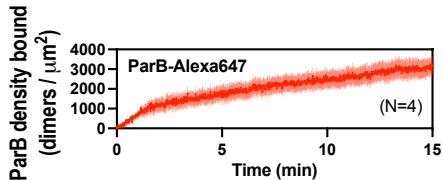

B

## Washing

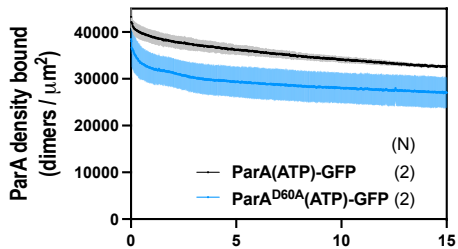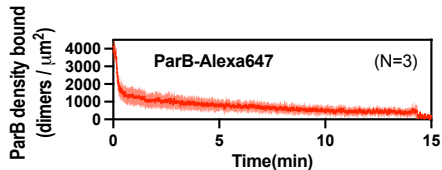

Supplement: supp [file elife-79480-supp-v1.zip]

A

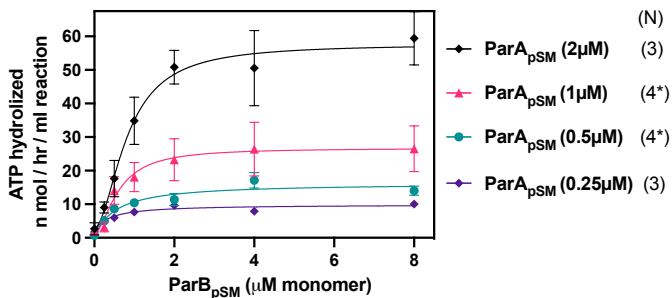

B

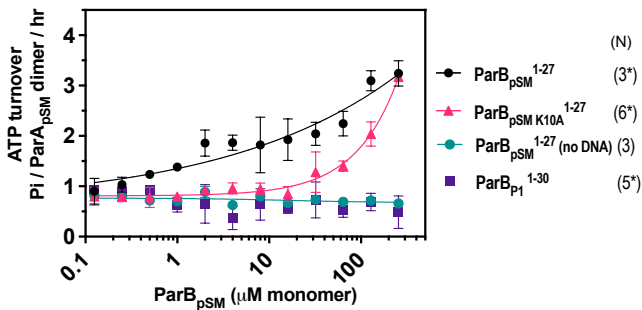

C

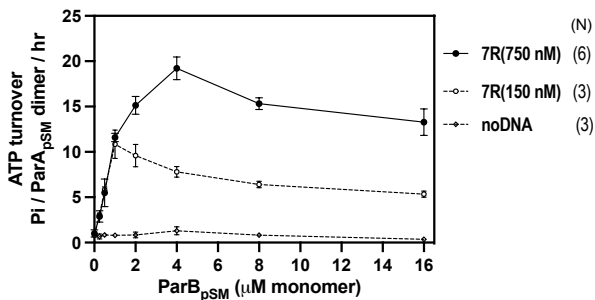

Supplement: supp [file elife-79480-supp-v1.zip]

Size  
(bp)

300  
200  
150  
100  
75  
50  
35  
20  
10

1R

2R

3R (1)

4R (1)

5R

6R

7R

scram

3R-1nc

3R-1nc-3R

3R-2nc-3R

3R (2)

4R (2)

4R (3)

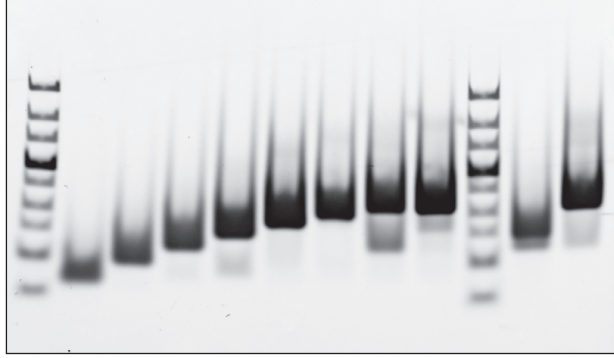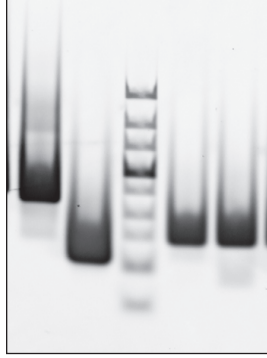

Supplement: supp [file elife-79480-supp-v1.zip]
